# Supplementary material for: A comprehensive assessment of fungal communities in various habitats from an ice-free area of maritime Antarctica: diversity, distribution, and ecological trait
Source: Environ Microbiome. 2022 Nov 15;17:54. doi: 10.1186/s40793-022-00450-0 (PMC9667611; doi:10.1186/s40793-022-00450-0)
Supplement: Supplementary file 2 — Additional file 2. Table S2. Representative sequence of fungal ASV detected in the 213 samples. [file 40793_2022_450_MOESM2_ESM.xlsx]

## Sheet: Recovered_Sheet1
Table S2. Representative sequence of fungal ASV detected in the 213 samples.
>77a66cab2bee5b4f193a7d6190dae934
TAAAAGTCGTAACAAGGTTTCCGTAGGTGAACCTGCGGAAGGATCATTAAAGAGACGTTGCCCTTCGGGGTATACCTCCCACCCATTGTTTATTTACCTTTGTTGCTTTGGCAGTCCCGGCTTCGGCCCACCGGCTCCGGCTGGTCAGTGACTGTCGAAGATACCAAAACTCTGTTTGTTAATATTGTCTGAGTACTATATAATAGTTAAAACTTTCAACAACGGATCTCTTGGTTCTGG
>31c4a98b3b3597bcef019f9160b30b08
CCAGAACCAAGAGATCCGTTGTTGAAAGTTTTAACTATTATATAGTACTCAGACAATATTAACAAACAGAGTTTTGGTATCTTCGACAGTCACTGACCAGCCGGAGCCGGTGGGCCGAAGCCGGGACTGCCAAAGCAACAAAGGTAAATAAACAATGGGTGGGAGGTATACCCCGAAGGGCAACGTCTCTTTAATGATCCTTCCGCAGGTTCACCTACGGAAACCTTGTTACGACTTTTA
>db379b6c51448539ed6a616c4314e53b
GTAAAAGTCGTAACAAGGTTTCCGTAGGTGAACCTGCGGAAGGATCATTAATACGTATCCACGTTTCAACCCCCTGTGCACATGTCGTACGAGCCGGCCCCGGTAAAGTCCTTTGCGGGACTGGGGATTAAAAATGGTCGTATCTGGTATTCATTTACCTTATTTTTAACACCTTTTTCACACACCTGTACTAATCTTGACTGCTTTCGAGCGTCAAAAATACGAAACTAAAACAACTCTTAGCAACGGATATCTTGGTTCCCGC
>12ec5dabcdcb2624b75f6d46e1e08542
GCGGGAACCAAGATATCCGTTGCTAAGAGTTGTTTTAGTTTCGTATTTTTGACGCTCGAAAGCAGTCAAGATTAGTACAGGTGTGTGAAAAAGGTGTTAAAAATAAGGTAAATGAATACCAGATACGACCATTTTTAATCCCCAGTCCCGCAAAGGACTTTACCGGGGCCGGCTCGTACGACATGTGCACAGGGGGTTGAAACGTGGATACGTATTAATGATCCTTCCGCAGGTTCACCTACGGAAACCTTGTTACGACTTTTAC
>af4ba33571c87fd54660c2abd08d3026
AAAAGTCGTAACAAGGTTTCCGTAGGTGAACCTGCGGAAGGATCATTAATACGTATCCACGTTTCAACCCCCTGTGCACATGTCGTACGAGCCGGCCCCGGTAAAGTCCTTTGCGGGACTGGGGATTAAAAATGGTCGTATCTGGTATTCATTTACCTTATTTTTAACACCTTTTTCACACACCTGTACTAATCTTGACTGCTTTCGAGCGTCAAAAATACGAAACTAAAACAACTCTTAGCAACGGATATCTTGGTTCCC
>06eda4f86df80dca1988f69b528e4545
GGGAACCAAGATATCCGTTGCTAAGAGTTGTTTTAGTTTCGTATTTTTGACGCTCGAAAGCAGTCAAGATTAGTACAGGTGTGTGAAAAAGGTGTTAAAAATAAGGTAAATGAATACCAGATACGACCATTTTTAATCCCCAGTCCCGCAAAGGACTTTACCGGGGCCGGCTCGTACGACATGTGCACAGGGGGTTGAAACGTGGATACGTATTAATGATCCTTCCGCAGGTTCACCTACGGAAACCTTGTTACGACTTTT
>18a473b795c4f701d3c519c7a4678a6a
GCGGGAGCCAAGAAATCCGTTGCTAACAGTTGTTCTTAGTTTCGTAAATCTCTCGACCGCGGACTATAGGCGTTCGTCCAGGAAGTGAGCTACATCAGTCAAGTTTTTGTAAAAAGTGGTAAAAAATAAAGATACAAGCTCGCCCAGGCTCAGCCTCTCCACAAGTGAAGAAACCTCCTCCAAACTAACAGGGCTTCCGAAGAAGCAGTCACTGCCGAAGCAGCGTTACAGTAAAATGCACGGGGTGTAACGTTAAGTTACGTGTTAATGATCCTTCCGCAGGTTCACCTACGGAAACCTTGTTACGACTTTTAC
>12a4016027f4f80dc67a798e0521950b
TAAAAGTCGTAACAAGGTAACCGTAGGTGAACCTGCGGTTGGATCATTAATAAAGATGGGCCTTTGGGCCCTCTAAACGCCAAGGCTGCCTTAAAAACAGCCGAGGTAAACACTTTGTGAACCGTTTATTGTCTCTGGCGGAAGTGCTGAAGCGCCTAGCGTGGATGTAGCCGTCAGTCTTTTTAACACCCTTTGTAAACACCGTCTTAATCAAATTAAAATTTGAAACAACTTTTGACAACGGATCTCTTGGCTCTCG
>05c0a9698e4423c4dd3f8ba1f5f838d8
GTAAAAGTCGTAACAAGGTTTCCGTAGGTGAACCTGCGGAAGGATCATTAACACGTAACTTAACGTTACACCCCGTGCATTTTACTGTAACGCTGCTTCGGCAGTGACTGCTTCTTCGGAAGCCCTGTTAGTTTGGAGGAGGTTTCTTCACTTGTGGAGAGGCTGAGCCTGGGCGAGCTTGTATCTTTATTTTTTACCACTTTTTACAAAAACTTGACTGATGTAGCTCACTTCCTGGACGAACGCCTATAGTCCGCGGTCGAGAGATTTACGAAACTAAGAACAACTGTTAGCAACGGATTTCTTGGCTCCCGC
>a4d6128a8153256c0a0339005afcb154
GGAACCAAGATATCCGTTGCTAAGAGTTGTTTTAGTTTCGTATTTTTGACGCTCGAAAGCAGTCAAGATTAGTACAGGTGTGTGAAAAAGGTGTTAAAAATAAGGTAAATGAATACCAGATACGACCATTTTTAATCCCCAGTCCCGCAAAGGACTTTACCGGGGCCGGCTCGTACGACATGTGCACAGGGGGTTGAAACGTGGATACGTATTAATGATCCTTCCGCAGGTTCACCTACGGAAACCTTGTTACGACTTT
>482797122ebaf5fc6ebf0469a918d621
GTAAAAGTCGTAACAAGGTTTCCGTAGGTGAACCTGCGGAAGGATCATTAATAGAGCAATGAACAGTCAGCGCCCCGGGAGCAATCCTGGGGGTTACCCTCCTCGGAGGGTTTAGAGACGTCGGGCCTCTCGGAGAAGCTCGGTTCAGACCTCCACCCTTGAATAAATTACCTTTGTTGCTTTGGCAGGACGCCTCGTGCCAGCGGCTTCGGCTGCTGAGTGCCTGCCAGAGGACCACAACTCTTGAAATACATGATGTCTGAGTACTATATAATAGTTAAAACTTTCAACAACGGATCTCTTGGTTCTGGC
>be11a8c7bbdc2ef453fe1e1de6cbe4e6
AAAGTCGTAACAAGGTTTCCGTAGGTGAACCTGCGGAAGGATCATTAATACGTATCCACGTTTCAACCCCCTGTGCACATGTCGTACGAGCCGGCCCCGGTAAAGTCCTTTGCGGGACTGGGGATTAAAAATGGTCGTATCTGGTATTCATTTACCTTATTTTTAACACCTTTTTCACACACCTGTACTAATCTTGACTGCTTTCGAGCGTCAAAAATACGAAACTAAAACAACTCTTAGCAACGGATATCTTGGTTCC
>b49836e38175aecc42a2b97802913b82
CGAGAGCCAAGAGATCCGTTGTCAAAAGTTGTTTCAAATTTTAATTTGATTAAGACGGTGTTTACAAAGGGTGTTAAAAAGACTGACGGCTACATCCACGCTAGGCGCTTCAGCACTTCCGCCAGAGACAATAAACGGTTCACAAAGTGTTTACCTCGGCTGTTTTTAAGGCAGCCTTGGCGTTTAGAGGGCCCAAAGGCCCATCTTTATTAATGATCCAACCGCAGGTTCACCTACGGTTACCTTGTTACGACTTTTA
>687e6208bd4d00c8c3a3b53a8c24e097
GCCAGAACCAAGAGATCCGTTGTTGAAAGTTTTAACTATTATATAGTACTCAGACATCATGTATTTCAAGAGTTGTGGTCCTCTGGCAGGCACTCAGCAGCCGAAGCCGCTGGCACGAGGCGTCCTGCCAAAGCAACAAAGGTAATTTATTCAAGGGTGGAGGTCTGAACCGAGCTTCTCCGAGAGGCCCGACGTCTCTAAACCCTCCGAGGAGGGTAACCCCCAGGATTGCTCCCGGGGCGCTGACTGTTCATTGCTCTATTAATGATCCTTCCGCAGGTTCACCTACGGAAACCTTGTTACGACTTTTAC
>aef158a4dfffe16af9d0e8710138c59b
AAAGTCGTAACAAGGTTTCCGTAGGTGAACCTGCGGAAGGATCATTAAAGAGACGTTGCCCTTCGGGGTATACCTCCCACCCATTGTTTATTTACCTTTGTTGCTTTGGCAGTCCCGGCTTCGGCCCACCGGCTCCGGCTGGTCAGTGACTGTCGAAGATACCAAAACTCTGTTTGTTAATATTGTCTGAGTACTATATAATAGTTAAAACTTTCAACAACGGATCTCTTGGTTCT
>a971d490b7a0132415027f3643924a98
AGAACCAAGAGATCCGTTGTTGAAAGTTTTAACTATTATATAGTACTCAGACAATATTAACAAACAGAGTTTTGGTATCTTCGACAGTCACTGACCAGCCGGAGCCGGTGGGCCGAAGCCGGGACTGCCAAAGCAACAAAGGTAAATAAACAATGGGTGGGAGGTATACCCCGAAGGGCAACGTCTCTTTAATGATCCTTCCGCAGGTTCACCTACGGAAACCTTGTTACGACTTT
>bbe5a8043d62e341e8541021ee5d83bd
GTAAAAGTCGTAACAAGGTAACCGTAGGTGAACCTGCGGTTGGATCATTAATAAAGATGGGCCTTTGGGCCCTCTAAACGCCAAGGCTGCCTTAAAAACAGCCGAGGTAAACACTTTGTGAACCGTTTATTGTCTCTGGCGGAAGTGCTGAAGCGCCTAGCGTGGATGTAGCCGTCAGTCTTTTTAACACCCTTTGTAAACACCGTCTTAATCAAATTAAAATTTGAAACAACTTTTGACAACGGATCTCTTGGCTCTCGC
>15a9161a23e4aca17e428c3a367a8bdf
GGAACCAAGAGATCCGTTGTTGAAAGTTTTATGCTGTTCTATCTGATACTCGGACGTCACTGATCAAACGGAATTGAATGGGCCTCTGACGGGCGCTGGCCAGCCCGGAAGCCGACGCGGGGCGAGCCCCGGGGCCCGCCAAAGCAACGAAGGTAAGTAGACAATGGGTGAAGAGTCGGGGGCCGAAACCCCCGGGGGCGCGAGGGCCCTCTCTCAGTAATGATCCTTCCGCAGGTTCACCTACGGAAACCTTGTTACGACTTT
>b60cd4c9e083b3264a25214f45dc607c
CGGGAACCAAGATATCCGTTGCTAAGAGTTGTTTTAGTTTCGTATTTTTGACGCTCGAAAGCAGTCAAGATTAGTACAGGTGTGTGAAAAAGGTGTTAAAAATAAGGTAAATGAATACCAGATACGACCATTTTTAATCCCCAGTCCCGCAAAGGACTTTACCGGGGCCGGCTCGTACGACATGTGCACAGGGGGTTGAAACGTGGATACGTATTAATGATCCTTCCGCAGGTTCACCTACGGAAACCTTGTTACGACTTTTA
>fcd6c5aa395c58522fdd9e7c2f41f41a
AAAGTCGTAACAAGGTTTCCGTAGGTGAACCTGCGGAAGGATCATTACTGAGAGAGGGCCCTCGCGCCCCCGGGGGTTTCGGCCCCCGACTCTTCACCCATTGTCTACTTACCTTCGTTGCTTTGGCGGGCCCCGGGGCTCGCCCCGCGTCGGCTTCCGGGCTGGCCAGCGCCCGTCAGAGGCCCATTCAATTCCGTTTGATCAGTGACGTCCGAGTATCAGATAGAACAGCATAAAACTTTCAACAACGGATCTCTTGGTTCC
>a69c7da171f1e67fce2bbec638cf55ac
AAAAGTCGTAACAAGGTTTCCGTAGGTGAACCTGCGGAAGGATCATTCATAATAAGTGTTTTATGGCACTTTTTAAATCCATATCCACCTTGTGTGCAATGTCGGTTGGTCTTCTTCATGGAGATCGACCAAACATCAACCTAATTTTTAACTCTTTGTCTGAAAAATATTATGAATAAATAATTCAAATACAACTTTCAACAACGGATCTCTTGGCTCTC
>7e129d5bff361f7ae820a77fba9ece71
AAAAGTCGTAACAAGGTTTCCGTAGGTGAACCTGCGGAAGGATCATTAGTGAATTATAGGGCGTCTACTTGTAGAGCCTGACCTCCACTTCTAACACTGTGCACTTGATGGCGAGGTAATGGAACTTTCGAGTGAAACTACCTTGCGGCTTCATTTTAAACATTAGTCAAAGTATGTAATGAAATAAAAAACAAAAAAAAACTTTCAACAACGGATCTCTTGGCTCTC
>36aa8cbf9ec3a861583e98a1d666dbb5
TAAAAGTCGTAACAAGGTTTCCGTAGGTGAACCTGCGGAAGGATCATTAATACGTATCCACGTTTCAACCCCCTGTGCACATGTCGTACGAGCCGGCCCCGGTAAAGTCCTTTGCGGGACTGGGGATTAAAAATGGTCGTATCTGGTATTCATTTACCTTATTTTTAACACCTTTTTCACACACCTGTACTAATCTTGACTGCTTTCGAGCGTCAAAAATACGAAACTAAAACAACTCTTAGCAACGGATATCTTGGTTCCCG
>e579e7b3b4dfdb7c92cbd2105d57fb84
GTAAAAGTCGTAACAAGGTTTCCGTAGGTGAACCTGCGGAAGGATCATTACAGTAGTCGCCCGGGTTGCCGCAAGGCCTCCCGGGTAACCTACCACCCTTTGTTTATTACACTTTGTTGCTTTGGCAAGCCTGCCCTCGGGCTGCTGGCTCCGGCCGGCGAGCGCTTGCCAGAGGACCTAAACTCTGTTTGTCTATACTGTCTGAGTACTATATAATAGTTAAAACTTTCAACAACGGATCTCTTGGTTCTGGC
>a4bb0f0ad42b03ce5900d49067b05f82
TAAAAGTCGTAACAAGGTTTCCGTAGGTGAACCTGCGGAAGGATCATTAACGAGTGTGCGGGTCCCTCCGGGCCCCATCTCCCATCCTTGACTACCCTACCCCGACATCGTCACGCACACGCGGCCCCCGGGGGGGACTTTCCCCCCGACCGGTGCCCGTGCCGCGGGTGGATGAACGAGCTCTTCTCCCCATTCTTTGACTACAGCAGACGTCTTAAAAACGTAACCATTAATAAAACTTTCAACAACGGATCTCTTGGTTCTGG
>e83ef4ed36d6d57fb5e8fc44fdc171e9
GAGAGCCAAGAGATCCGTTGTTGAAAGTTGTATTTGAATTATTTATTCATAATATTTTTCAGACAAAGAGTTAAAAATTAGGTTGATGTTTGGTCGATCTCCATGAAGAAGACCAACCGACATTGCACACAAGGTGGATATGGATTTAAAAAGTGCCATAAAACACTTATTATGAATGATCCTTCCGCAGGTTCACCTACGGAAACCTTGTTACGACTTTT
>6d49ea1dce857148e92bef5e956fc205
CCAGAACCAAGAGATCCGTTGTTGAAAGTTTTATTAATGGTTACGTTTTTAAGACGTCTGCTGTAGTCAAAGAATGGGGAGAAGAGCTCGTTCATCCACCCGCGGCACGGGCACCGGTCGGGGGGAAAGTCCCCCCCGGGGGCCGCGTGTGCGTGACGATGTCGGGGTAGGGTAGTCAAGGATGGGAGATGGGGCCCGGAGGGACCCGCACACTCGTTAATGATCCTTCCGCAGGTTCACCTACGGAAACCTTGTTACGACTTTTA
>d0d4f2da9f39b767224ecbab7988c9e7
GCCAGAACCAAGAGATCCGTTGTTGAAAGTTTTAACTATTATATAGTACTCAGACAGTATAGACAAACAGAGTTTAGGTCCTCTGGCAAGCGCTCGCCGGCCGGAGCCAGCAGCCCGAGGGCAGGCTTGCCAAAGCAACAAAGTGTAATAAACAAAGGGTGGTAGGTTACCCGGGAGGCCTTGCGGCAACCCGGGCGACTACTGTAATGATCCTTCCGCAGGTTCACCTACGGAAACCTTGTTACGACTTTTAC
>27fef6e0bfa46f6d3ef6493dc6187fff
AAAAGTCGTAACAAGGTTTCCGTAGGTGAACCTGCGGAAGGATCATTAAAGAGACGTTGCCCTTCGGGGTATACCTCCCACCCATTGTTTATTTACCTTTGTTGCTTTGGCAGTCCCGGCTTCGGCCCACCGGCTCCGGCTGGTCAGTGACTGTCGAAGATACCAAAACTCTGTTTGTTAATATTGTCTGAGTACTATATAATAGTTAAAACTTTCAACAACGGATCTCTTGGTTCTG
>866aca96f6210774d2c91dcc15d024a1
ATCGATGCCAGAACCAAGAGATCCGTTGTTGAAAGTTTTATAGTATTATAAAAGTACTCAGACGACACTGATTCAGAATAATCCTGCCCGAAGGCAAGGCAACCGGTCAAACAACAAGAAAGGGAGATTGTGTTTCCACAACTCGGTAATGATCCCTCCGCAGGTTCACCTACGGAGACCTTGTTACGACTTTTACTTCCTCTAAATGACCA
>cb2e56fabc31eb913a1f71892d1fba03
CAGAACCAAGAGATCCGTTGTTGAAAGTTTTAACTATTATATAGTACTCAGACAATATTAACAAACAGAGTTTTGGTATCTTCGACAGTCACTGACCAGCCGGAGCCGGTGGGCCGAAGCCGGGACTGCCAAAGCAACAAAGGTAAATAAACAATGGGTGGGAGGTATACCCCGAAGGGCAACGTCTCTTTAATGATCCTTCCGCAGGTTCACCTACGGAAACCTTGTTACGACTTTT
>5c4c8a8833c8eef94d64bb76f49a3b5a
GAGGAAGTAAAAGTCGTAACAAGGTCTCCGTAGGTGAACCTGCGGAGGGATCATTACCGAGTTGTGGAAACACAATCTCCCTTTCTTGTTGTTTGACCGGTTGCCTTGCCTTCGGGCAGGATTATTCTGAATCAGTGTCGTCTGAGTACTTTTATAATACTATAAAACTTTCAACAACGGATCTCTTGGTTCTGGCATCGATGAAGAACGCA
>920ad607efaf95497d851b1ac4a248b8
CCAGAACCAAGAGATCCGTTGTTGAAAGTTTTAACTATTATATAGTACTCAGACAGTATAGACAAACAGAGTTTAGGTCCTCTGGCAAGCGCTCGCCGGCCGGAGCCAGCAGCCCGAGGGCAGGCTTGCCAAAGCAACAAAGTGTAATAAACAAAGGGTGGTAGGTTACCCGGGAGGCCTTGCGGCAACCCGGGCGACTACTGTAATGATCCTTCCGCAGGTTCACCTACGGAAACCTTGTTACGACTTTTA
>ee7b24ca89212c91051bbb10ce4a5bb0
TAAAAGTCGTAACAAGGTTTCCGTAGGTGAACCTGCGGAAGGATCATTACAGTAGTCGCCCGGGTTGCCGCAAGGCCTCCCGGGTAACCTACCACCCTTTGTTTATTACACTTTGTTGCTTTGGCAAGCCTGCCCTCGGGCTGCTGGCTCCGGCCGGCGAGCGCTTGCCAGAGGACCTAAACTCTGTTTGTCTATACTGTCTGAGTACTATATAATAGTTAAAACTTTCAACAACGGATCTCTTGGTTCTGG
>85db97dfea045031e0281dcd33e33852
GTAAAAGTCGTAACAAGGTTTCCGTAGGTGAACCTGCGGAAGGATCATTAGTGAATATTAGCGCATCTACTTCTAGAGCGTGACCTCCACTTTCTAACTCTGTGCATTTATTGGCGGATGAATTGGTGAAAGCCTTGACATCTCGCGGCTCATTTTATAACACTAGTTAAAGTATGTAACGAAATATCGAAACAAAAAAAAACTTTCAACAACGGATCTCTTGGCTTGCGC
>fc92f99fa6b84040c41cdcdaf62572e0
AAAGTCGTAACAAGGTTTCCGTAGGTGAACCTGCGGAAGGATCATTAGTGAATTATAGGGCGTCTACTTGTAGAGCCTGACCTCCACTTCTAACACTGTGCACTTGATGGAAAGGTAATTAGATTGAGCCTTCGGGCTTATGAAGAGAACCTTTCGGCTTCATTTTAAACATTAGTCAAAGTATGTAAAGAAATTTAAAACAAAAAAAAACTTTCAACAACGGATCTCTTGGCTCT
>510e6fd92580a7fd8e1ba60e81635367
TAAAAGTCGTAACAAGGTTTCCGTAGGTGAACCTGCGGAAGGATCATTAAAGAGACGTTGCCCTTCGGGGTATACCTCCCACCCTTTGTTTATTATACCTTTGTTGCTTTGGCGGGCCCGTCCTCGGACCACCGGCTTCGGCTGGTCAGCGCCCGCCAGAGGACCTAAAACTCTGTTTGTTCATATTGTCTGAGTACTATATAATAGTTAAAACTTTCAACAACGGATCTCTTGGTTCTGG
>408b470f5b1585406872b6daa073061a
TAAAAGTCGTAACAAGGTTTCCGTAGGTGAACCTGCGGAAGGATCATTCATAATAAGTGTTTTATGGCACTTTTTAAATCCATATCCACCTTGTGTGCAATGTCAGTCGGTCTTCTTTATGGAGATCGGCCAAACATCAACCTAATTTTTTAACTCTTTGTCTGAAAAATATTATGAATAAAATAATTCAAAATACAACTTTCAACAACGGATCTCTTGGCTCTCG
>11f63cfb42bfbc766ff5281b3c9e53b3
TAAAAGTCGTAACAAGGTTTCCGTAGGTGAACCTGCGGAAGGATCATTAATAGAGCAATGAACAGTCAGCGCCCCGGGAGCAATCCTGGGGGTTACCCTCCTCGGAGGGTTTAGAGACGTCGGGCCTCTCGGAGAAGCTCGGTTCAGACCTCCACCCTTGAATAAATTACCTTTGTTGCTTTGGCAGGACGCCTCGTGCCAGCGGCCTCGGCTGCTGAGTGCCTGCCAGAGGACCACAACTCTTGAAATACATGATGTCTGAGTACTATATAATAGTTAAAACTTTCAACAACGGATCTCTTGGTTCTGG
>64398710cdee98e3d4adae67ce4a76e0
AGAACCAAGATATCCGTTGCTAAGAGTTGTTCAGCGTTTCGTAATTCCACTTCCTTTAAACTCGCAATCAAGTAATTAATAAATTAACCAAAGGATATACGGCAGAGCAAGCTTCATTTTTAGTACAATTTTTCTGTAAAAAGGGGTTAAAAAAATGAGAAGAGTGTCACCATTTTAAGCTCCGTTCCCCCGAAAGGAACTTCACCACTGAATCCGGTGTTAAGTTGTAAGTGCACAGGGGGTTGATACGTGAGTACGTGTTAATGATCCTTCCGCAGGTTCACCTACGGAAACCTTGTTACGACTTT
>b393a91afb838d98bc8d37e2376cbd34
AAAGTCGTAACAAGGTAACCGTAGGTGAACCTGCGGTTGGATCATTAATAAAGATGGGCCTTTGGGCCCTCTAAACGCCAAGGCTGCCTTAAAAACAGCCGAGGTAAACACTTTGTGAACCGTTTATTGTCTCTGGCGGAAGTGCTGAAGCGCCTAGCGTGGATGTAGCCGTCAGTCTTTTTAACACCCTTTGTAAACACCGTCTTAATCAAATTAAAATTTGAAACAACTTTTGACAACGGATCTCTTGGCTCT
>cc456cc4e362bfebffc40bf9051a93cc
GTAAAAGTCGTAACAAGGTCTCCGTAGGTGAACCTGCGGAGGGATCATTACAGAGAACATCGCCCGCAAGGGTGACTCTCCAACCCTATGTTAATTATACCTTTGTTGCTTTGGCGAGCCGCTTCGGCCACCGGCTCACGCTGGTGAGCGCTCGCCAGAGGACCCTAAACTCTGTTTATACATGTCGTCTGAGTACTATATAATAGTTAAAACTTTCAACAACGGATCTCTTGGTTCTGGC
>ead338fd25d843ec315d43c09efea2a8
GCGAGAGCCAAGAGATCCGTTGTCAAAAGTTGTTTCAAATTTTAATTTGATTAAGACGGTGTTTACAAAGGGTGTTAAAAAGACTGACGGCTACATCCACGCTAGGCGCTTCAGCACTTCCGCCAGAGACAATAAACGGTTCACAAAGTGTTTACCTCGGCTGTTTTTAAGGCAGCCTTGGCGTTTAGAGGGCCCAAAGGCCCATCTTTATTAATGATCCAACCGCAGGTTCACCTACGGTTACCTTGTTACGACTTTTAC
>6eb56dba82e7ff93b3351b374a80d2ba
CCAGAACCAAGAGATCCGTTGTTGAAAGTTTTAACTATTATATAGTACTCAGACAATATGAACAAACAGAGTTTTAGGTCCTCTGGCGGGCGCTGACCAGCCGAAGCCGGTGGTCCGAGGACGGGCCCGCCAAAGCAACAAAGGTATAATAAACAAAGGGTGGGAGGTATACCCCGAAGGGCAACGTCTCTTTAATGATCCTTCCGCAGGTTCACCTACGGAAACCTTGTTACGACTTTTA
>4fa6e08f872e58d97395303992f10f26
GAGAGCCAAGAGATCCGTTGTTGAAAGTTTTTTTTTGTTTTTTATTTCATTACATACTTTGACTAATGTTTAAAATGAAGCCGCAAGGTAGTTTCACTCGAAAGTTCCATTACCTCGCCATCAAGTGCACAGTGTTAGAAGTGGAGGTCAGGCTCTACAAGTAGACGCCCTATAATTCACTAATGATCCTTCCGCAGGTTCACCTACGGAAACCTTGTTACGACTTTT
>5c3e2621a51a24f1dd38ee5f7519b25b
GCGCAAGCCAAGAGATCCGTTGTTGAAAGTTTTTTTTTGTTTCGATATTTCGTTACATACTTTAACTAGTGTTATAAAATGAGCCGCGAGATGTCAAGGCTTTCACCAATTCATCCGCCAATAAATGCACAGAGTTAGAAAGTGGAGGTCACGCTCTAGAAGTAGATGCGCTAATATTCACTAATGATCCTTCCGCAGGTTCACCTACGGAAACCTTGTTACGACTTTTAC
>27996db936b9380626af796aba4dcd88
GTAAAAGTCGTAACAAGGTTTCCGTAGGTGAACCTGCGGAAGGATCATTACTGAGAGAGGGCCCTCGCGCCCCCGGGGGTTTCGGCCCCCGACTCTTCACCCATTGTCTACTTACCTTCGTTGCTTTGGCGGGCCCCGGGGCTCGCCCCGCGTCGGCTTCCGGGCTGGCCAGCGCCCGTCAGAGGCCCATTCAATTCCGTTTGATCAGTGACGTCCGAGTATCAGATAGAACAGCATAAAACTTTCAACAACGGATCTCTTGGTTCCAGC
>50dd1311cf3aac2622a55043f191f8e4
AAAGTCGTAACAAGGTTTCCGTAGGTGAACCTGCGGAAGGATCATTAACACGTACTCACGTATCAACCCCCTGTGCACTTACAACTTAACACCGGATTCAGTGGTGAAGTTCCTTTCGGGGGAACGGAGCTTAAAATGGTGACACTCTTCTCATTTTTTTAACCCCTTTTTACAGAAAAATTGTACTAAAAATGAAGCTTGCTCTGCCGTATATCCTTTGGTTAATTTATTAATTACTTGATTGCGAGTTTAAAGGAAGTGGAATTACGAAACGCTGAACAACTCTTAGCAACGGATATCTTGGTTCT
>f9bc77225cb1050796429271780bf19e
AAAGTCGTAACAAGGTTTCCGTAGGTGAACCTGCGGAAGGATCATTACAGTAGTCGCCCGGGTTGCCGCAAGGCCTCCCGGGTAACCTACCACCCTTTGTTTATTACACTTTGTTGCTTTGGCAAGCCTGCCCTCGGGCTGCTGGCTCCGGCCGGCGAGCGCTTGCCAGAGGACCTAAACTCTGTTTGTCTATACTGTCTGAGTACTATATAATAGTTAAAACTTTCAACAACGGATCTCTTGGTTCT
>ebe784d538482507a653e2e04de36f02
AGAACCAAGAGATCCGTTGTTGAAAGTTTTAACTATTATATAGTACTCAGACAGTATAGACAAACAGAGTTTAGGTCCTCTGGCAAGCGCTCGCCGGCCGGAGCCAGCAGCCCGAGGGCAGGCTTGCCAAAGCAACAAAGTGTAATAAACAAAGGGTGGTAGGTTACCCGGGAGGCCTTGCGGCAACCCGGGCGACTACTGTAATGATCCTTCCGCAGGTTCACCTACGGAAACCTTGTTACGACTTT
>f0393e6a2a7916710e350998ea11b528
AGAGCCAAGAGATCCGTTGTCAAAAGTTGTTTCAAATTTTAATTTGATTAAGACGGTGTTTACAAAGGGTGTTAAAAAGACTGACGGCTACATCCACGCTAGGCGCTTCAGCACTTCCGCCAGAGACAATAAACGGTTCACAAAGTGTTTACCTCGGCTGTTTTTAAGGCAGCCTTGGCGTTTAGAGGGCCCAAAGGCCCATCTTTATTAATGATCCAACCGCAGGTTCACCTACGGTTACCTTGTTACGACTTT
>e9cf1e0bb70e5d230042a55b595c56f8
CCAGAACCAAGAGATCCGTTGTTGAAAGTTTTAACTATTATATAGTACTCAGACATCATGTATTTCAAGAGTTGTGGTCCTCTGGCAGGCACTCAGCAGCCGAGGCCGCTGGCACGAGGCGTCCTGCCAAAGCAACAAAGGTAATTTATTCAAGGGTGGAGGTCTGAACCGAGCTTCTCCGAGAGGCCCGACGTCTCTAAACCCTCCGAGGAGGGTAACCCCCAGGATTGCTCCCGGGGCGCTGACTGTTCATTGCTCTATTAATGATCCTTCCGCAGGTTCACCTACGGAAACCTTGTTACGACTTTTA
>a85a4bf22dc5216e47c51d7f212051ea
GGAGCCAAGAAATCCGTTGCTAACAGTTGTTCTTAGTTTCGTAAATCTCTCGACCGCGGACTATAGGCGTTCGTCCAGGAAGTGAGCTACATCAGTCAAGTTTTTGTAAAAAGTGGTAAAAAATAAAGATACAAGCTCGCCCAGGCTCAGCCTCTCCACAAGTGAAGAAACCTCCTCCAAACTAACAGGGCTTCCGAAGAAGCAGTCACTGCCGAAGCAGCGTTACAGTAAAATGCACGGGGTGTAACGTTAAGTTACGTGTTAATGATCCTTCCGCAGGTTCACCTACGGAAACCTTGTTACGACTTT
>24eb13081d8d590e609316dcdf4b4399
TAAAAGTCGTAACAAGGTTTCCGTAGGTGAACCTGCGGAAGGATCATTACCATTACCTCAACTGGCGGGTTTCAATTGTTCTTCGGTTCAATTGACTCTCACCTGTTTGACGTTACCCATGCCTTTTTGCGTACAGTTTGTTTTCCCAGCAGGGCATTACGCCCCTACGGGATATCAATCCACCCATTGTATTTGCAGTCAATGTCTGAAAAATAATAATAATTACAACTTTTAACAACGGATCTCTTGGTTCTGG
>646ba9442a9da262ca5d6e38e1082d8d
AAAGTCGTAACAAGGTTTCCGTAGGTGAACCTGCGGAAGGATCATTAACGAGTGTGTGGGTCCCCCCGGGCCCCATCTCCCATCCTTGACTACCCCACTCCGACATCGCCACGCACGCGGGTCCCCCGGGGAGGACATCGTCCCCTCGACCGGGGCCCGCGCCGCGGGTGGATGGCCGATCTCTTCTCCCTCTTCTTTGACTACAGCAGACGTCTTAAAAACGTAACCATTAATAAAACTTTCAACAACGGATCTCTTGGTTCT
>e688648ea6cc9371e194424f381c7590
CGAGAGCCAAGAGATCCGTTGTTGAAAGTTGTATTTTGAATTATTTTATTCATAATATTTTTCAGACAAAGAGTTAAAAAATTAGGTTGATGTTTGGCCGATCTCCATAAAGAAGACCGACTGACATTGCACACAAGGTGGATATGGATTTAAAAAGTGCCATAAAACACTTATTATGAATGATCCTTCCGCAGGTTCACCTACGGAAACCTTGTTACGACTTTTA
>82be52e3dd92831051c072e386ed2384
CCAGAACCAAGAGATCCGTTGTTAAAAGTTGTAATTATTATTATTTTTCAGACATTGACTGCAAATACAATGGGTGGATTGATATCCCGTAGGGGCGTAATGCCCTGCTGGGAAAACAAACTGTACGCAAAAAGGCATGGGTAACGTCAAACAGGTGAGAGTCAATTGAACCGAAGAACAATTGAAACCCGCCAGTTGAGGTAATGGTAATGATCCTTCCGCAGGTTCACCTACGGAAACCTTGTTACGACTTTTA
>7d10ddc8ef9f374a084b04d01756e780
AGAGCCAAGAGATCCGTTGTTGAAAGTTTTTTTTTGTTTTAAATTTCTTTACATACTTTGACTAATGTTTAAAATGAAGCCGAAAGGTTCTCTTCATAAGCCCGAAGGCTCAATCTAATTACCTTTCCATCAAGTGCACAGTGTTAGAAGTGGAGGTCAGGCTCTACAAGTAGACGCCCTATAATTCACTAATGATCCTTCCGCAGGTTCACCTACGGAAACCTTGTTACGACTTT
>d7a24fdd231b536f2e3777e7238debf8
AGAACCAAGAGATCCGTTGTTGAAAGTTTTAACTATTATATAGTACTCAGACTGCATTAACAAACAGAGTTTTAGGTCCTCTGGCAGGCACGGACCGGCCGGAGCCGGTGGTCCGAAGACGGGCCTGCCAAAGCAACAGAGGTATGATAAACATAGGGTGGGAGGTCGACCCCGAAGGGCAACGTCTCTTTAATGATCCTTCCGCAGGTTCACCTACGGAAACCTTGTTACGACTTT
>c4d3fc69c0a53b33387985d712ffd81b
AGAACCAAGAGATCCGTTGTTGAAAGTTTTATTAATGGTTACGTTTTTAAGACGTCTGCTGTAGTCAAAGAAGAGGGAGAAGAGATCGGCCATCCACCCGCGGCGCGGGCCCCGGTCGAGGGGACGATGTCCTCCCCGGGGGACCCGCGTGCGTGGCGATGTCGGAGTGGGGTAGTCAAGGATGGGAGATGGGGCCCGGGGGGACCCACACACTCGTTAATGATCCTTCCGCAGGTTCACCTACGGAAACCTTGTTACGACTTT
>0c6020cfe4b707b544995253d40ca496
GTAAAAGTCGTAACAAGGTTTCCGTAGGTGAACCTGCGGAAGGATCATTCGTAGTGGGATGACAGGCGAAAGCGGCGATTCCGTCGTTTTCAGCCAGTCTTTCTATCATGTTTCGCGCACAACTTTTCAACATACTTTTTTTAACAAAACAAAAACCCAAAACTTAATAAACAATAACAAACCAAAATAACCAAACAGAAAACTCGTGACGGTGGATGTCTAGGCTCCAGC
>5a43b3665758f1c65266fab2b94757d9
AAAAGTCGTAACAAGGTTTCCGTAGGTGAACCTGCGGAAGGATCATTACAGAGTTCATGCCCTAACGGGTAGATCTCCCACCCTTGAATACATACCTTTGTTGCTTTGGCGGGTCGCATCGTCCACCGGCTTCGGCTGGTGAGTGCCCGCCAGAGAACCCTAAATTCTGAATTAAAGTGTCGTCTGAGTACTATATAATAGTTAAAACTTTCAACAACGGATCTCTTGGTTCTG
>4122df06735c81cec069fc8eaf2a50e2
AAAAGTCGTAACAAGGTTTCCGTAGGTGAACCTGCGGAAGGATCATTAATAGAGCAATGAACAGTCAGCGCCCCGGGAGCAATCCTGGGGGTTACCCTCCTCGGAGGGTTTAGAGACGTCGGGCCTCTCGGAGAAGCTCGGTTCAGACCTCCACCCTTGAATAAATTACCTTTGTTGCTTTGGCAGGACGCCTCGTGCCAGCGGCCTCGGCTGCTGAGTGCCTGCCAGAGGACCACAACTCTTGAAATACATGATGTCTGAGTACTATATAATAGTTAAAACTTTCAACAACGGATCTCTTGGTTCTG
>08d3f75f9d093ccc71180cb39085f286
AAAGTCGTAACAAGGTTTCCGTAGGTGAACCTGCGGAAGGATCATTAACACGTAACTTAACGTTACACCCCGTGCATTTTACTGTAACGCTGCTTCGGCAGTGACTGCTTCTTCGGAAGCCCTGTTAGTTTGGAGGAGGTTTCTTCACTTGTGGAGAGGCTGAGCCTGGGCGAGCTTGTATCTTTATTTTTTACCACTTTTTACAAAAACTTGACTGATGTAGCTCACTTCCTGGACGAACGCCTATAGTCCGCGGTCGAGAGATTTACGAAACTAAGAACAACTGTTAGCAACGGATTTCTTGGCTCC
>bf3995f66c1acd2dfba117eaeba9df22
GCGCAAGCCAAGAGATCCGTTGTTGAAAGTTTTTTTTTGTTTCGATATTTCGTTACATACTTTAACTAGTGTTATAAAATGAGCCGCAGGAAATTAATAGTTCGAGTATTTCTACTGATCTAATATTTTCCCGCCAAATAAATGCACAGAGTTAGAAAGTGGAGGTCACGCTCTCCGAAGAGATGCGCTAATATTCACTAATGATCCTTCCGCAGGTTCACCTACGGAAACCTTGTTACGACTTTTAC
>0dad8ec4183db72678942594d629e514
CAGAACCAAGAGATCCGTTGTTGAAAGTTTTAACTATTATATAGTACTCAGACGACACTTTAATTCAGAATTTAGGGTTCTCTGGCGGGCACTCACCAGCCGAAGCCGGTGGACGATGCGACCCGCCAAAGCAACAAAGGTATGTATTCAAGGGTGGGAGATCTACCCGTTAGGGCATGAACTCTGTAATGATCCTTCCGCAGGTTCACCTACGGAAACCTTGTTACGACTTTT
>7de4fc3d679c1815ca6e01b133595c73
GTAAAAGTCGTAACAAGGTTTCCGTAGGTGAACCTGCGGAAGGATCATTAGTGAATATTAGCGCATCTCTTCGGAGAGCGTGACCTCCACTTTCTAACTCTGTGCATTTATTTGGCGGGAAAATATTAGATCAGTAGAAATACTCGAACTATTAATTTCCTGCGGCTCATTTTATAACACTAGTTAAAGTATGTAACGAAATATCGAAACAAAAAAAAACTTTCAACAACGGATCTCTTGGCTTGCGC
>7ffae869eacb4973e9a41a58902dbaae
TAAAAGTCGTAACAAGGTTTCCGTAGGTGAACCTGCGGAAGGATCATTAACAAATCTGCTATGCGGCCGAGCCCTCGGGCTTGACGCATATATTTACCCCGAGCCTGGCAGCAATGCCGGCTTTGGTTGGGTGGGACGCAAGTCCTGCTCCGGTTGTGTGAGGGCGCAAGTCCTTGCCAGCCACATAGACGCTTGTATGTTTGACAGAGTTACAGTTGTAAAACTAAAATGACAACTTTTAACAATGGATCTCTTGGCTCTTG
>0f2a86f38367aab88439175ff5c355f2
CAGAACCAAGAGATCCGTTGTTGAAAGTTTTAACTATTATATAGTACTCAGACATCATGTATTTCAAGAGTTGTGGTCCTCTGGCAGGCACTCAGCAGCCGAGGCCGCTGGCACGAGGCGTCCTGCCAAAGCAACAAAGGTAATTTATTCAAGGGTGGAGGTCTGAACCGAGCTTCTCCGAGAGGCCCGACGTCTCTAAACCCTCCGAGGAGGGTAACCCCCAGGATTGCTCCCGGGGCGCTGACTGTTCATTGCTCTATTAATGATCCTTCCGCAGGTTCACCTACGGAAACCTTGTTACGACTTTT
>130baa9b69d39cbb92643ccbb8ba51c1
CAAGAGCCAAGAGATCCATTGTTAAAAGTTGTCATTTTAGTTTTACAACTGTAACTCTGTCAAACATACAAGCGTCTATGTGGCTGGCAAGGACTTGCGCCCTCACACAACCGGAGCAGGACTTGCGTCCCACCCAACCAAAGCCGGCATTGCTGCCAGGCTCGGGGTAAATATATGCGTCAAGCCCGAGGGCTCGGCCGCATAGCAGATTTGTTAATGATCCTTCCGCAGGTTCACCTACGGAAACCTTGTTACGACTTTTA
>4c6c474be790750eda4bf1a82cc6755c
AAAAGTCGTAACAAGGTTTCCGTAGGTGAACCTGCGGAAGGATCATTAAAGAGACGTTGCCCTTCGGGGTATACCTCCCACCCTTTGTTTATTTATACCTTTGTTGCTTTGGCAGACCCGGCTTCGGCCCACCGGCTCCGGCTGGTCAGTGTCTGCCAGAGGACCTAAAACTCTGTTTGTTAATATTGTCTGAGTACTATATAATAGTTAAAACTTTCAACAACGGATCTCTTGGTTCTG
>522b8ed5fd9869ca1bf709a97fd12057
GTAAAAGTCGTAACAAGGTTTCCGTAGGTGAACCTGCGGAAGGATCATTACAGTAGTCGCCCGGGACGCCGCAAGGCCTCCCGGGTAACCTACCACCCTTTGTTTATTACACTTTGTTGCTTTGGCAGGCCTGCCCTCGGGCTGCTGGCTCCGGCCGGCGAGCGCCTGCCAGAGGACCTAAACTCTGTTTGTCTATACTGTCTGAGTACTATATAATAGTTAAAACTTTCAACAACGGATCTCTTGGTTCTGGC
>6641dd99f95625cc8fd28fd41dc9ebe7
GCTGGAGCCTAGACATCCACCGTCACGAGTTTTCTGTTTGGTTATTTTGGTTTGTTATTGTTTATTAAGTTTTGGGTTTTTGTTTTGTTAAAAAAAGTATGTTGAAAAGTTGTGCGCGAAACATGATAGAAAGACTGGCTGAAAACGACGGAATCGCCGCTTTCGCCTGTCATCCCACTACGAATGATCCTTCCGCAGGTTCACCTACGGAAACCTTGTTACGACTTTTAC
>6ee9fe78918fc2ec12aafa5ccbd9e7b6
TAAAAGTCGTAACAAGGTAACCGTAGGTGAACCTGCGGTTGGATCATTAACAATTTTGGGCTTTAGAGCTCTTAATACTGGGGCCGCCTTAAAACGGCCTTGGTCAACACTTGTGAACTATAGATGCTACCGCATTCTTAACCCCTTTATAAAACCCGTCTTAATCAAATAACAAAATTTGAAACAACTTTTGACAACGGATCTCTTGGCTCTCG
>7e022f2e7255aaa8682961d1bb695056
AAAAGTCGTAACAAGGTAACCGTAGGTGAACCTGCGGTTGGATCATTAATAAAGATGGGCCTTTGGGCCCTCTAAACGCCAAGGCTGCCTTAAAAACAGCCGAGGTAAACACTTTGTGAACCGTTTATTGTCTCTGGCGGAAGTGCTGAAGCGCCTAGCGTGGATGTAGCCGTCAGTCTTTTTAACACCCTTTGTAAACACCGTCTTAATCAAATTAAAATTTGAAACAACTTTTGACAACGGATCTCTTGGCTCTC
>6292f625d922d0d89dca8b90119abd67
CAGAACCAAGAGATCCGTTGTTGAAAGTTTTAACTATTATATAGTACTCAGACAATATTAACAAACAGAGTTTTAGGTCCTCTGGCAGACACTGACCAGCCGGAGCCGGTGGGCCGAAGCCGGGTCTGCCAAAGCAACAAAGGTATAAATAAACAAAGGGTGGGAGGTATACCCCGAAGGGCAACGTCTCTTTAATGATCCTTCCGCAGGTTCACCTACGGAAACCTTGTTACGACTTTT
>a91b4f230959ca017601fc27d047535a
TAAAAGTCGTAACAAGGTTTCCGTAGGTGAACCTGCGGAAGGATCATTACCGAGAGAGGGCCCCGCGCCCCGGGGGCTCCGGCCCCCACTCTTCACCCTGTGTTTATACGTCCATGTTGCTTTGGCGGGTCTTGGGGTCATGCCCATGCCGGCTCCGGGCGTCTGCCCGCGCCGGTGCGTGCCCGCCGGAGGCCCTTTACCATTCTGTTTACGTGAAGTCCGAGTCCATCATAATGAATTAAAACTTTCAACAACGGATCTCTTGGTTCTGG
>e47e6904177e09368f13a6e79359a595
AAAGTCGTAACAAGGTTTCCGTAGGTGAACCTGCGGAAGGATCATTAAAGAGACGTTGCCCTTCGGGGTCGACCTCCCACCCTATGTTTATCATACCTCTGTTGCTTTGGCAGGCCCGTCTTCGGACCACCGGCTCCGGCCGGTCCGTGCCTGCCAGAGGACCTAAAACTCTGTTTGTTAATGCAGTCTGAGTACTATATAATAGTTAAAACTTTCAACAACGGATCTCTTGGTTCT
>7a223147e9811e71cfec2008b8eb018a
TAAAAGTCGTAACAAGGTTTCCGTAGGTGAACCTGCGGAAGGATCATTCATAATAAGTGTTTTATGGCACTTTTTTAAATCCATATCCACCTTGTGTGCAATGTCAGGGTTGGTCTCTTGAAAAAGAGATCAGCCCCAAACATCAACCCAATCTTAACTCTTTGTCTGAAAAATATTATGAATAAAACAATTCAAAATACAACTTTCAACAACGGATCTCTTGGCTCTCG
>4d955d77678f518e5aa961810071157c
TAAAAGTCGTAACAAGGTCTCCGTTGGTGAACCAGCGGAGGGATCATTATCGAGTTTATCCAACTCCCAACCCTATGTGAACCTACCTTTATGTTGCTTCGGCGGTCTCGCGCCGGGTTGCTCCCCTGGGGGCTCCCGGGACCACGCGTCCGCCGGAGACCACAAACTCTTGATTTTGCGAAAGCAGTATTATTCTGAGTGGCCGAAAGGCAAAAAACAAATGAATCAAAACTTTCAACAACGGATCTCTTGGTTCTGG
>eb80e39cd2a6fdad0ccc7d51def36d6b
TAAAAGTCGTAACAAGGTTTCCGTAGGTGAACCTGCGGAAGGATCATTAACAAATCATGTTGCATGTCGAGCCCGCAAGGGACCTCGTACATGTATATATACCCCGAGTCTGATGATCCTCACGGATTGTCGGCTTTGGTTGGGCAGGCTAGGCTTTCGGGCCTGGACTGCTCCGGACAGTGTGCTTGGAGACACCTTTAGGGGTGACTTTGGGTGCCTGGCCACGTAGACGCTTATTAGTTTGACAGAGTTTAGGTTGAAACCAATAAAAATGACAACTTTTAACAATGGATCTCTTGGCTCTTG
>0d649ac2b1f318dee9be91bf4dc78ce4
GCCAGAACCAAGAGATCCGTTGTTGAAAGTTTTAACTATTATATAGTACTCAGACGACATGTATAAACAGAGTTTAGGGTCCTCTGGCGAGCGCTCACCAGCGTGAGCCGGTGGCCGAAGCGGCTCGCCAAAGCAACAAAGGTATAATTAACATAGGGTTGGAGAGTCACCCTTGCGGGCGATGTTCTCTGTAATGATCCCTCCGCAGGTTCACCTACGGAGACCTTGTTACGACTTTTAC
>4d573b1899f088fd43ff213c2b20b299
CCAGAACCAAGAGATCCGTTGTTGAAAGTTTTAATTCATTATGATGGACTCGGACTTCACGTAAACAGAATGGTAAAGGGCCTCCGGCGGGCACGCACCGGCGCGGGCAGACGCCCGGAGCCGGCATGGGCATGACCCCAAGACCCGCCAAAGCAACATGGACGTATAAACACAGGGTGAAGAGTGGGGGCCGGAGCCCCCGGGGCGCGGGGCCCTCTCTCGGTAATGATCCTTCCGCAGGTTCACCTACGGAAACCTTGTTACGACTTTTA
>5fd19be1f27d76883f51cc3ae131a98a
GAGAGCCAAGAGATCCGTTGTCAAAAGTTGTTTCAAATTTTAATTTGATTAAGACGGTGTTTACAAAGGGTGTTAAAAAGACTGACGGCTACATCCACGCTAGGCGCTTCAGCACTTCCGCCAGAGACAATAAACGGTTCACAAAGTGTTTACCTCGGCTGTTTTTAAGGCAGCCTTGGCGTTTAGAGGGCCCAAAGGCCCATCTTTATTAATGATCCAACCGCAGGTTCACCTACGGTTACCTTGTTACGACTTTT
>d9f96c543ac5ce807c2b57c0c5062493
CAAGAGCCAAGAGATCCATTGTTAAAAGTTGTCATTTTTATTGGTTTCAACCTAAACTCTGTCAAACTAATAAGCGTCTACGTGGCCAGGCACCCAAAGTCACCCCTAAAGGTGTCTCCAAGCACACTGTCCGGAGCAGTCCAGGCCCGAAAGCCTAGCCTGCCCAACCAAAGCCGACAATCCGTGAGGATCATCAGACTCGGGGTATATATACATGTACGAGGTCCCTTGCGGGCTCGACATGCAACATGATTTGTTAATGATCCTTCCGCAGGTTCACCTACGGAAACCTTGTTACGACTTTTA
>fbf11feac1820de959f7fa8c44a6592e
GAGAGCCAAGAGATCCGTTGTCAAAAGTTGTTAAGTTCAATTAAAACTTTATAATGAATTCTTAGGCTAATGAAAATAAAGAATTTGGTTGGTGTGTCCCGTAAAGAGACACAGATACAATAACATATTCACAAGGGGTTGAAAGACCGTGAACTCGAAAGAACACGATCCCATTAAATTTCATTAATGATCCAACCGCAGGTTCACCTACGGTTACCTTGTTACGACTTTT
>f712f6484b2fb0667853b66361f88f8b
AAAGTCGTAACAAGGTTTCCGTAGGTGAACCTGCGGAAGGATCATTAACGAGTGAGGGTCCCACCGGGCCCCATCTCCCATCCGTGTCTATCCTACCCTGCCCCCGATCCGACGGACGCTTAAGCGGGAGGAGGTTGGACTCATCCCCTCCGCTCGCTGCCGACCCTATGGACGGATGGCTTACCTTTTCTCTAAAATCTTGACTATAGAGAACGTCCTAAAAACGTAATCGCAATATAAAACTTTCAACAACGGATCTCTTGGTTCT
>2bbd0f8a68550a277921c1faf16a2c64
AAAGTCGTAACAAGGTTTCCGTAGGTGAACCTGCGGAAGGATCATTAATAGAGCAATGAACAGTCAGCGCCCCGGGAGCAATCCTGGGGGTTACCCTCCTCGGAGGGTTTAGAGACGTCGGGCCTCTCGGAGAAGCTCGGTTCAGACCTCCACCCTTGAATAAATTACCTTTGTTGCTTTGGCAGGACGCCTCGTGCCAGCGGCTTCGGCTGCTGAGTGCCTGCCAGAGGACCACAACTCTTGAAATACATGATGTCTGAGTACTATATAATAGTTAAAACTTTCAACAACGGATCTCTTGGTTCT
>e09fb890efd22c58a5be89ae3c96fc0a
AAAAGTCGTAACAAGGTTTCCGTAGGTGAACCTGCGGAAGGATCATTAACGTACGCGAGGAGCAGCCTCACAGCTCTCTTCTGCACCAGCTCGTGCGCGACGCGGGCCGTCCCTCTCCGGGGGAGCGGCTCGCCGAGCCCAAAGGAACCGTAACCGACCGGTCGGGTGCCCTTCTGACAGCGGAGGGCGGCGAGGCGGCGCGCAAGCGTCCGCCCGACCGAACTTTTTTACACACTATCATTTGTTGTTGCCGGAGGAATGAACGATAAAGATCTCTTAGCGGTGGATCACTCGGCTCGG
>08a5828eb208632b543d57ac5eeca77a
AAAAGTCGTAACAAGGTTTCCGTAGGTGAACCTGCGGAAGGATCATTAATAGAGCAATGAACAGTCAGCGCCCCGGGAGCAATCCTGGGGGTTACCCTCCTCGGAGGGTTTAGAGACGTCGGGCCTCTCGGAGAAGCTCGGTTCAGACCTCCACCCTTGAATAAATTACCTTTGTTGCTTTGGCAGGACGCCTCGTGCCAGCGGCTTCGGCTGCTGAGTGCCTGCCAGAGGACCACAACTCTTGAAATACATGATGTCTGAGTACTATATAATAGTTAAAACTTTCAACAACGGATCTCTTGGTTCTG
>1c20758477d28fefe0169fa87648039c
GCCAGAACCAAGAGATCCGTTGTTGAAAGTTTTAACTATTATATAGTACTCAGACAGTATAGACAAACAGAGTTTAGGTCCTCTGGCAGGCGCTCGCCGGCCGGAGCCAGCAGCCCGAGGGCAGGCCTGCCAAAGCAACAAAGTGTAATAAACAAAGGGTGGTAGGTTACCCGGGAGGCCTTGCGGCGTCCCGGGCGACTACTGTAATGATCCTTCCGCAGGTTCACCTACGGAAACCTTGTTACGACTTTTAC
>097197c25df992123345bb2f2b925357
AGAACCAAGAGATCCGTTGTTGAAAGTTTTAACTATTATATAGTACTCAGACATCATGTATTTCAAGAGTTGTGGTCCTCTGGCAGGCACTCAGCAGCCGAAGCCGCTGGCACGAGGCGTCCTGCCAAAGCAACAAAGGTAATTTATTCAAGGGTGGAGGTCTGAACCGAGCTTCTCCGAGAGGCCCGACGTCTCTAAACCCTCCGAGGAGGGTAACCCCCAGGATTGCTCCCGGGGCGCTGACTGTTCATTGCTCTATTAATGATCCTTCCGCAGGTTCACCTACGGAAACCTTGTTACGACTTT
>93be222b85ace4b0bd8dca8e9d00ca5a
CGAGAGCCAAGAGATCCGTTGTCAAAAGTTGTTTCAAATTTTGTTATTTGATTAAGACGGGTTTTATAAAGGGGTTAAGAATGCGGTAGCATCTATAGTTCACAAGTGTTGACCAAGGCCGTTTTAAGGCGGCCCCAGTATTAAGAGCTCTAAAGCCCAAAATTGTTAATGATCCAACCGCAGGTTCACCTACGGTTACCTTGTTACGACTTTTA
>ba4126a51cba293d0455437ca48fc131
GTAAAAGTCGTAACAAGGTTTCCGTAGGTGAACCTGCGGAAGGATCATTAAAGAGACGTTGCCCTTCGGGGTATACCTCCCACCCTTTGTTTATTATACCTTTGTTGCTTTGGCGGGCCCGTCCTCGGACCACCGGCTTCGGCTGGTCAGCGCCCGCCAGAGGACCTAAAACTCTGTTTGTTCATATTGTCTGAGTACTATATAATAGTTAAAACTTTCAACAACGGATCTCTTGGTTCTGGC
>cd1a27d0161494cdd45a34258724a26d
CGAGAGCCAAGAGATCCGTTGTCAAAAGTTGTTAAGTTCAATTAAAACTTTATAATGAATTCTTAGGCTAATGAAAATAAAGAATTTGGTTGGTGTGTCCCGTAAAGAGACACAGATACAATAACATATTCACAAGGGGTTGAAAGACCGTGAACTCGAAAGAACACGATCCCATTAAATTTCATTAATGATCCAACCGCAGGTTCACCTACGGTTACCTTGTTACGACTTTTA
>ffb5bde9da3a671209c5edfa3872b980
GTAAAAGTCGTAACAAGGTTTCCGTAGGTGAACCTGCGGAAGGATCATTAACAAATCTGCTATGCGGCCGAGCCCTCGGGCTTGACGCATATATTTACCCCGAGCCTGGCAGCAATGCCGGCTTTGGTTGGGTGGGACGCAAGTCCTGCTCCGGTTGTGTGAGGGCGCAAGTCCTTGCCAGCCACATAGACGCTTGTATGTTTGACAGAGTTACAGTTGTAAAACTAAAATGACAACTTTTAACAATGGATCTCTTGGCTCTTGC
>5319ac6185527a86d4d12e61866ac34d
CCAGAACCAAGAGATCCGTTGTTGAAAGTTTTGATTCATTTGTTTTTTGCCTTTCGGCCACTCAGAATAATACTGCTTTCGCAAAATCAAGAGTTTGTGGTCTCCGGCGGACGCGTGGTCCCGGGAGCCCCCAGGGGAGCAACCCGGCGCGAGACCGCCGAAGCAACATAAAGGTAGGTTCACATAGGGTTGGGAGTTGGATAAACTCGATAATGATCCCTCCGCTGGTTCACCAACGGAGACCTTGTTACGACTTTTA
>8c88ba3f18fda89018e24761c814bdec
GCTGGAACCAAGAGATCCGTTGTTGAAAGTTTTATGCTGTTCTATCTGATACTCGGACGTCACTGATCAAACGGAATTGAATGGGCCTCTGACGGGCGCTGGCCAGCCCGGAAGCCGACGCGGGGCGAGCCCCGGGGCCCGCCAAAGCAACGAAGGTAAGTAGACAATGGGTGAAGAGTCGGGGGCCGAAACCCCCGGGGGCGCGAGGGCCCTCTCTCAGTAATGATCCTTCCGCAGGTTCACCTACGGAAACCTTGTTACGACTTTTAC
>166803fe4b2c82bb055b354c8c879f78
CAGAACCAAGAGATCCGTTGTTGAAAGTTGTAACTATTATGTTTTTTCAGACGCTGATTGCAACTGCAAAGGGTTTGAATGTTGTCCAATCGGCGGGCGGACCCGCCGAGGAAACGAAGGTACTCAAAAGACATGGGTAAGAGGTAGCAGACCGAAGTCTACAAACTCTAGGTAATGATCCTTCCGCAGGTTCACCTACGGAAACCTTGTTACGACTTTT
>eddcc71a0e027cd1d26c7c549d894357
GTAAAAGTCGTAACAAGGTCTCCGTTGGTGAACCAGCGGAGGGATCATTATCGAGTTTATCAACTCCCAACCCTATGTGAACCTACCTTTATGTTGCTTCGGCGGTGTCGCGCCGGGTTGCCCCCAGCGGGCTCCCGGGACCACGCGCCCGCCGGAGACCACAAACTCTTGATTTTGCGAAAGCAGTATTCTTCTGAGTGGCCGAAAGGCAAAAAACAAATGAATCAAAACTTTCAACAACGGATCTCTTGGTTCTGGC
>231cbdf95af20eeaed694cb6d303e530
TAAAAGTCGTAACAAGGTAACCGTAGGTGAACCTGCGGTTGGATCATTAATGAAATTTAATGGGATCGTGTTCTTTCGAGTTCACGGTCTTTCAACCCCTTGTGAATATGTTATTGTATCTGTGTCTCTTTACGGGACACACCAACCAAATTCTTTATTTTCATTAGCCTAAGAATTCATTATAAAGTTTTAATTGAACTTAACAACTTTTGACAACGGATCTCTTGGCTCTCG
>73c89c4a0083519765f187b768b970ea
CAGAACCAAGAGATCCGTTGTTGAAAGTTTTAACTATTATATAGTACTCAGACATCATGTATTTCAAGAGTTGTGGTCCTCTGGCAGGCACTCAGCAGCCGAAGCCGCTGGCACGAGGCGTCCTGCCAAAGCAACAAAGGTAATTTATTCAAGGGTGGAGGTCTGAACCGAGCTTCTCCGAGAGGCCCGACGTCTCTAAACCCTCCGAGGAGGGTAACCCCCAGGATTGCTCCCGGGGCGCTGACTGTTCATTGCTCTATTAATGATCCTTCCGCAGGTTCACCTACGGAAACCTTGTTACGACTTTT
>d8421914962dff90eea55a33efa0c5be
GTAAAAGTCGTAACAAGGTTTCCGTAGGTGAACCTGCGGAAGGATCATTAAAAATCCTTCACCCTGGATCCAGTATCCGGGTGGACCAGCCTCCGGGGCTCTAATCCGTACGTAATGCCACATGCAGCGCCCTTCATGGGATGCGGTGGTACTCGTTACTTCAAACCATTGTGAACCTTCCTGTTGCTTCGGCGGCATGCTTCGTGCTGTCAGCCCGTCTGAGGCCCACCATGAAACCATTTCTGTAAACTTCTGTCAGTATACGAAAAGTAAATCGTTAAAACTTTCAACAACGGATCTCTTGGTTCTCGC
>0570d3f8b37172a757634c2d1134bdac
TAAAAGTCGTAACAAGGTTTCCGTAGGTGAACCTGCGGAAGGATCATTACAGAGTGGGGCTCCGCGCTCCAGGGGGTTCGCCCCCGCCTCTCAACCCCGTGAATATTATACCTTTGTTGCTTTGGCGGGCCTTGGGGTCACGCTCATGCCGGGCCTTGCCCGGTGAGTGCCCGCCAGAAGCCCACCAAAACTCGTTTGATCCATGCCGTCTGATGTCTAAAACAAAATAAAGCAAAACTTTCAACAACGGATCTCTTGGCTCTGG
>b093452a5df036bc75ab5372a7b01e20
CGAGAGCCAAGAGATCCGTTGTTGAAAGTTGTATTTTGAATTGTTTTATTCATAATATTTTTCAGACAAAGAGTTAAGATTGGGTTGATGTTTGGGGCTGATCTCTTTTTCAAGAGACCAACCCTGACATTGCACACAAGGTGGATATGGATTTAAAAAAGTGCCATAAAACACTTATTATGAATGATCCTTCCGCAGGTTCACCTACGGAAACCTTGTTACGACTTTTA
>6f25bf772713ea2e4dbf7dce6719dba7
TAAAAGTCGTAACAAGGTTTCCGTAGGTGAACCTGCGGAAGGATCATTAGTGAATTTAAGGGCGTAGACTTCGGTCTGGCCTGAACCCCCACTTTCTAACTCTGTGCATTTATCGGTGGAGGACTTGGACAAGCACGATAACGGACTTCGGTAGAATCCGTATGACATGCGAATCCTTGCTTTCTACGGCTCATTTTAAACACTAGTCAAAGTATGTAACGAAATATCGAAATAAAAAAAAACTTTCAACAACGGATCTCTTGGCTCTCG
>da8ccb8d60a0ee658b7a68bee80c476e
GTAAAAGTCGTAACAAGGTTTCCGTAGGTGAACCTGCGGAAGGATCATTAATACGTATCCACGTTTCAACCCCCTGTGCACATGTCGTACGAGCCGGCCCCGGTAAAGTCCTTTGCGGGACTGGGGATTAAAAATGGTCGTATCTGGTGAGAGAATTCACGTTCTCCTGCCTTTTTTTAACACCTTTTTCAAACAACTGTACTAATCTTGACTGCTTTCGAGCGTCAAAAATACGAAACCAAAACAACTCTTAGCAACGGATATCTTGGTTCCCGC
>48ebafeb9fa7c625638f2451ded243bb
CGAGAACCAAGAGATCCGTTGTCAAAAGTTGTTTAAAGATTAATTTCTTTATGTAAGACTAGATGGAAATGAGTTTAATAACCAGCGAGTGCCAAAGAACAAGAGCTCTTTAACGGTCTCACTGGATAAAAGACAGGGGTTGCGTAAGGGAGCTTCCTTGAAGGGTCACTCCCCACACCCTCAGCCCACCCTCCGAAGAAGTTGAGCTGAGAATCAATGAAAATTCATTAATGATCCAACCGCAGGTTCACCTACGGTTACCTTGTTACGACTTTTA
>f0f975e9b07e75f30c58bdd538ad0cba
AAAAGTCGTAACAAGGTTTCCGTAGGTGAACCTGCGGAAGGATCATTACAGTAGTCGCCCGGGTTGCCGCAAGGCCTCCCGGGTAACCTACCACCCTTTGTTTATTACACTTTGTTGCTTTGGCAAGCCTGCCCTCGGGCTGCTGGCTCCGGCCGGCGAGCGCTTGCCAGAGGACCTAAACTCTGTTTGTCTATACTGTCTGAGTACTATATAATAGTTAAAACTTTCAACAACGGATCTCTTGGTTCTG
>a1aed57d8f97ce45b7763a6d43bc02b3
GCCAGAACCAAGAGATCCGTTGTTGAAAGTTTTAATTCATTATGATGGACTCGGACTTCACGTAAACAGAATGGTAAAGGGCCTCCGGCGGGCACGCACCGGCGCGGGCAGACGCCCGGAGCCGGCATGGGCATGACCCCAAGACCCGCCAAAGCAACATGGACGTATAAACACAGGGTGAAGAGTGGGGGCCGGAGCCCCCGGGGCGCGGGGCCCTCTCTCGGTAATGATCCTTCCGCAGGTTCACCTACGGAAACCTTGTTACGACTTTTAC
>eceef7a5e7ba47a116aa689c91cacfb7
CCAGAGCCAAGAGATCCGTTGTTGAAAGTTTTGCTTTATTTTGTTTTAGACATCAGACGGCATGGATCAAACGAGTTTTGGTGGGCTTCTGGCGGGCACTCACCGGGCAAGGCCCGGCATGAGCGTGACCCCAAGGCCCGCCAAAGCAACAAAGGTATAATATTCACGGGGTTGAGAGGCGGGGGCGAACCCCCTGGAGCGCGGAGCCCCACTCTGTAATGATCCTTCCGCAGGTTCACCTACGGAAACCTTGTTACGACTTTTA
>7ba4a3566f12feff25944c25600c5e60
TAAAAGTCGTAACAAGGTAACCGTAGGTGAACCTGCGGTTGGATCATTAATGAATTTTCATTGATTCTCAGCTCAACTTCTTCGGAGGGTGGGCTGAGGGTGTGGGGAGTGACCCTTCAAGGAAGCTCCCTTACGCAACCCCTGTCTTTTATCCAGTGAGACCGTTAAAGAGCTCTTGTTCTTTGGCACTCGCTGGTTATTAAACTCATTTCCATCTAGTCTTACATAAAGAAATTAATCTTTAAACAACTTTTGACAACGGATCTCTTGGTTCTCG
>9f1a58de07baca5124d282e84068a5ea
CAGAACCAAGAGATCCGTTGTTGAAAGTTTTAACTATTATATAGTACTCAGACAGTATAGACAAACAGAGTTTAGGTCCTCTGGCAAGCGCTCGCCGGCCGGAGCCAGCAGCCCGAGGGCAGGCTTGCCAAAGCAACAAAGTGTAATAAACAAAGGGTGGTAGGTTACCCGGGAGGCCTTGCGGCAACCCGGGCGACTACTGTAATGATCCTTCCGCAGGTTCACCTACGGAAACCTTGTTACGACTTTT
>3c275be4a03395f48a67a3dfb331ef2e
GAGAGCCAAGAGATCCGTTGTTGAAAGTTTTTTTTTATTTCGATATTTCGTTACATACTTTGACTAGTGTTTAAAATGAGCCGTAGAAAGCAAGGATTCGCATGTCATACGGATTCTACCGAAGTCCGTTATCGTGCTTGTCCAAGTCCTCCACCGATAAATGCACAGAGTTAGAAAGTGGGGGTTCAGGCCAGACCGAAGTCTACGCCCTTAAATTCACTAATGATCCTTCCGCAGGTTCACCTACGGAAACCTTGTTACGACTTTT
>d5ebfe2a2731e3defe9f229f2140f1f3
GTAAAAGTCGTAACAAGGTTTCCGTAGGTGAACCTGCGGAAGGATCATTAGTGAATTATAGGGCGTCTACTTGTAGAGCCTGACCTCCACTTCTAACACTGTGCACTTGATGGCGAGGTAATGGAACTTTCGAGTGAAACTACCTTGCGGCTTCATTTTAAACATTAGTCAAAGTATGTCATGAAATAAAAAACAAAAAAAAACTTTCAACAACGGATCTCTTGGCTCTCGC
>d6b869c02a889ede7914fba9ac8bb2ca
CCGAGCCGAGTGATCCACCGCTAAGAGATCTTTATCGTTCATTCCTCCGGCAACAACAAATGATAGTGTGTAAAAAAGTTCGGTCGGGCGGACGCTTGCGCGCCGCCTCGCCGCCCTCCGCTGTCAGAAGGGCACCCGACCGGTCGGTTACGGTTCCTTTGGGCTCGGCGAGCCGCTCCCCCGGAGAGGGACGGCCCGCGTCGCGCACGAGCTGGTGCAGAAGAGAGCTGTGAGGCTGCTCCTCGCGTACGTTAATGATCCTTCCGCAGGTTCACCTACGGAAACCTTGTTACGACTTTT
>36c336f8a7386a4028986bbb4a2fe572
GTAAAAGTCGTAACAAGGTTTCCGTAGGTGAACCTGCGGAAGGATCATTAATAGAGCAATGAACAGTCAGCGCCCCGGGAGCAATCCTGGGGGTTACCCTCCTCGGAGGGTTTAGAGACGTCGGGCCTCTCGGAGAAGCTCGGTTCAGACCTCCACCCTTGAATAAATTACCTTTGTTGCTTTGGCAGGACGCCTCGTGCCAGCGGCCTCGGCTGCTGAGTGCCTGCCAGAGGACCACAACTCTTGAAATACATGATGTCTGAGTACTATATAATAGTTAAAACTTTCAACAACGGATCTCTTGGTTCTGGC
>0351b7070a3f2e83549bd913794da89a
AAAAGTCGTAACAAGGTTTCCGTAGGTGAACCTGCGGAAGGATCATTACCTAGAGTTTGTAGACTTCGGTCTGCTACCTCTTACCCATGTCTTTTGAGTACCTTCGTTTCCTCGGCGGGTCCGCCCGCCGATTGGACAACATTCAAACCCTTTGCAGTTGCAATCAGCGTCTGAAAAAACATAATAGTTACAACTTTCAACAACGGATCTCTTGGTTCTG
>39a3a8528837c177dadd6646ad9abeed
AAAAGTCGTAACAAGGTTTCCGTAGGTGAACCTGCGGAAGGATCATTAAAAATGAAGCCGGGAAACCGGTCCTTCTAACCCTTGATTATCTCAATTTGTTGCTTTGGTGGGCCGCGCAAGCACCGGCTTCGGCTGGATCGTGCCCGCCAGAGGACCACAACTCTGTATTAAATGTCGTCTGAGTACTATAAAATAGTTAAAACTTTCAACAACGGATCTCTTGGTTCTG
>8d7760ae535f454bc14f394273f86464
AAAGTCGTAACAAGGTTTCCGTAGGTGAACCTGCGGAAGGATCATTAATAAACCTAGTCGTTCGCGTACACAGGGGCAACCCTCGCGCGATGTCAGCAATACCTAGGTCACCCTTGAATAAACTACCCTTGTTGCTTTGGCGGGCCGCCCCTCGGGGCCAGCGGCTTCGGCTGCTGCGCGCCCGCCAGAGGACCACAACTCTTGTTTTTAGTGATGTCTGAGTACTATATAATAGTTAAAACTTTCAACAACGGATCTCTTGGTTCT
>187f9662d0cf239f2b33a93948e5386d
AAAAGTCGTAACAAGGTTTCCGTAGGTGAACCTGCGGAAGGATCATTATCGAGTACGGGTCCCTTGGGCCCCATCTCCAACCCCTGCCTATACTACCACGTTGCTTTGACGGGCCCGTCCTTGACTGGACCGCCGGGGGTTTGTCCTCTGGTCCGTGCCCGTCAGTAGGCCCCACAAAATCGTTGAGCAGTGATGTCTAAATATCAAACAAATAACTAAAACTTTCAACAACGGATCTCTTGGTTCTG
>4cda56cff650d6aeef8619299ea5950a
AAAGTCGTAACAAGGTCTCCGTTGGTGAACCAGCGGAGGGATCATTACTGAGTTACCGCTCATCAACCCTTTGTGAACATACCTTAACTGTTGCTTCGGCGGGTAGGCGTCCCCTAAAAAGGACGTCTCCCGGCCCTCTCCCGTCCGCGGGTGGGGCGCCCGCCGGAGGATAACCAAACTCTGATTTAACGACGTTTCTTCTGAGTGACACAAGCAAATAATCAAAACTTTTAACAACGGATCTCTTGGTTCT
>bd238d6a4d1a5b51803cfd58ae568134
TAAAAGTCGTAACAAGGTTTCCGTAGGTGAACCTGCGGAAGGATCATTCATAATAAGTGTTTTACTGCACTTTTTAAAAATAGTACTCACCTTGTGTGCAATGTTGTGTTTCTTTTCGGAGAAACACCTACACCAACCTATAACCTTGAACCACTTTGTCTGAAAAACTATTATGAATACTTAATTCAAAATACAACTTTCAACAACGGATCTCTTGGCTCTCG
>935b09a26ced08ad35b63430812b53e4
GCAAGAGCCAAGAGATCCATTGTTAAAAGTTGTCATTTTAGTTTTACAACTGTAACTCTGTCAAACATACAAGCGTCTATGTGGCTGGCAAGGACTTGCGCCCTCACACAACCGGAGCAGGACTTGCGTCCCACCCAACCAAAGCCGGCATTGCTGCCAGGCTCGGGGTAAATATATGCGTCAAGCCCGAGGGCTCGGCCGCATAGCAGATTTGTTAATGATCCTTCCGCAGGTTCACCTACGGAAACCTTGTTACGACTTTTAC
>2257fc14833ba01331bb073147448e6a
GTAAAAGTCGTAACAAGGTTTCCGTAGGTGAACCTGCGGAAGGATCATTACCGAGAGAGGGCCCCGCGCCCCGGGGGCTCCGGCCCCCACTCTTCACCCTGTGTTTATACGTCCATGTTGCTTTGGCGGGTCTTGGGGTCATGCCCATGCCGGCTCCGGGCGTCTGCCCGCGCCGGTGCGTGCCCGCCGGAGGCCCTTTACCATTCTGTTTACGTGAAGTCCGAGTCCATCATAATGAATTAAAACTTTCAACAACGGATCTCTTGGTTCTGGC
>11ef31940d223c4b086896362d28e630
AAAGTCGTAACAAGGTTTCCGTAGGTGAACCTGCGGAAGGATCATTAATAGAGCAATGAACAGTCAGCGCCCCGGGAGCAATCCTGGGGGTTACCCTCCTCGGAGGGTTTAGAGACGTCGGGCCTCTCGGAGAAGCTCGGTTCAGACCTCCACCCTTGAATAAATTACCTTTGTTGCTTTGGCAGGACGCCTCGTGCCAGCGGCCTCGGCTGCTGAGTGCCTGCCAGAGGACCACAACTCTTGAAATACATGATGTCTGAGTACTATATAATAGTTAAAACTTTCAACAACGGATCTCTTGGTTCT
>8215a3df6781c33bc2042d87849cd94b
AAAGTCGTAACAAGGTTTCCGTAGGTGAACCTGCGGAAGGATCATTAATGAATTCTGAGTAGGCTCTGCCTCTCACCCTTCATATCCATAAACACCTGTGCACAGTCGGACCCTTGAGTCTTTCGGGACTCCTGGTGTCTTGACGATCTTATCAAACAACAATGTAACCAATGTAATCATTATTATAACATAATAAAACTTTTAACAACGGATCTCTTGGCTCT
>b795c2dea205141cee371e07e0e41729
AAAAGTCGTAACAAGGTTTCCGTAGGTGAACCTGCGGAAGGATCATTACCAGAGAGGAGCCAGTTCTCCTCGGGGCTCGGCCCCGCGGGCTCCGTCCCGTTTCTCCCCCCCGTGTCTACCTACCTTTGTTGCTTTGGCGGGCCGGGGGCCTCTGCCCCCCCCCACGGCTTGGACGGTGGCCTCGCGTTCGCGCGGATGGCCACCGCCGGCGGGGGTTGTGCCCGTCCATCGCCCTTATCCAACCCTGTTTATCAGTGTCGTCCGAGTCCACAAGAACAATCGTGAAAACTTTCAACAACGGATCTCTTGGTTCTG
>7e65a39b2411cf54593561a633b25a4e
CAGAACCAAGAGATCCGTTGTTGAAAGTTTTCACGATTGTTCTTGTGGACTCGGACGACACTGATAAACAGGGTTGGATAAGGGCGATGGACGGGCACAACCCCCGCCGGCGGTGGCCATCCGCGCGAACGCGAGGCCACCGTCCAAGCCGTGGGGGGGGGCAGAGGCCCCCGGCCCGCCAAAGCAACAAAGGTAGGTAGACACGGGGGGGAGAAACGGGACGGAGCCCGCGGGGCCGAGCCCCGAGGAGAACTGGCTCCTCTCTGGTAATGATCCTTCCGCAGGTTCACCTACGGAAACCTTGTTACGACTTTT
>ecd3747d56d9808d6f792aaa65475cc0
CGGGAGCCAAGAAATCCGTTGCTAACAGTTGTTCTTAGTTTCGTAAATCTCTCGACCGCGGACTATAGGCGTTCGTCCAGGAAGTGAGCTACATCAGTCAAGTTTTTGTAAAAAGTGGTAAAAAATAAAGATACAAGCTCGCCCAGGCTCAGCCTCTCCACAAGTGAAGAAACCTCCTCCAAACTAACAGGGCTTCCGAAGAAGCAGTCACTGCCGAAGCAGCGTTACAGTAAAATGCACGGGGTGTAACGTTAAGTTACGTGTTAATGATCCTTCCGCAGGTTCACCTACGGAAACCTTGTTACGACTTTTA
>063d2bdd76df2bde5636a8614ec4be16
TAAAAGTCGTAACAAGGTTTCCGTAGGTGAACCTGCGGAAGGATCATTACAGAGTTCATGCCCTAACGGGTAGATCTCCCACCCTTGAATACATACCTTTGTTGCTTTGGCGGGTCGCATCGTCCACCGGCTTCGGCTGGTGAGTGCCCGCCAGAGAACCCTAAATTCTGAATTAAAGTGTCGTCTGAGTACTATATAATAGTTAAAACTTTCAACAACGGATCTCTTGGTTCTGG
>a0b8f2c3fe6a8422b66b6ff678fa918e
AAAAGTCGTAACAAGGTTTCCGTAGGTGAACCTGCGGAAGGATCATTAACAGATGCTGCTAGTCAGATATCTTACCCCGTGTGAACTGTTCTTTTGACTTGGTGTCCAAGCACTGAATCTTCCAAGACTTTCTTGGCGGATTTACGTCTGGGCACCATCCGTTTTTACCCTTTGACTTTGAATGCCGAGTAAATTACAAAAGACTAGAAAACTTTTAGCAACGGATCTCTAGGCTCTT
>cadac09b774d1627f6edc64953431758
AGAACCAAGAGATCCGTTGTTGAAAGTTTTAACTATTATATAGTACTCAGACATCACTAAAAACAAGAGTTGTGGTCCTCTGGCGGGCGCGCAGCAGCCGAAGCCGCTGGCCCCGAGGGGCGGCCCGCCAAAGCAACAAGGGTAGTTTATTCAAGGGTGACCTAGGTATTGCTGACATCGCGCGAGGGTTGCCCCTGTGTACGCGAACGACTAGGTTTATTAATGATCCTTCCGCAGGTTCACCTACGGAAACCTTGTTACGACTTT
>ca908038d979e0bd3b533b72f813fe1e
TAAAAGTCGTAACAAGGTTTCCGTAGGTGAACCTGCGGAAGGATCATTAACACGTAACTTAACGTTACACCCCGTGCATTTTACTGTAACGCTGCTTCGGCAGTGACTGCTTCTTCGGAAGCCCTGTTAGTTTGGAGGAGGTTTCTTCACTTGTGGAGAGGCTGAGCCTGGGCGAGCTTGTATCTTTATTTTTTACCACTTTTTACAAAAACTTGACTGATGTAGCTCACTTCCTGGACGAACGCCTATAGTCCGCGGTCGAGAGATTTACGAAACTAAGAACAACTGTTAGCAACGGATTTCTTGGCTCCCG
>4c3951b618ac250b713fe93c58eb2483
AAGAGCCTAGAGATCCGTTGCTAAAAGTTTTCTAGTCTTTTGTAATTTACTCGGCATTCAAAGTCAAAGGGTAAAAACGGATGGTGCCCAGACGTAAATCCGCCAAGAAAGTCTTGGAAGATTCAGTGCTTGGACACCAAGTCAAAAGAACAGTTCACACGGGGTAAGATATCTGACTAGCAGCATCTGTTAATGATCCTTCCGCAGGTTCACCTACGGAAACCTTGTTACGACTTTT
>b3210b0fcbfe0ac68d7a5199f149d73c
GCCAGAACCAAGAGATCCGTTGTTGAAAGTTTTATTAATGGTTACGTTTTTAAGACGTCTGCTGTAGTCAAAGAATGGGGAGAAGAGCTCGTTCATCCACCCGCGGCACGGGCACCGGTCGGGGGGAAAGTCCCCCCCGGGGGCCGCGTGTGCGTGACGATGTCGGGGTAGGGTAGTCAAGGATGGGAGATGGGGCCCGGAGGGACCCGCACACTCGTTAATGATCCTTCCGCAGGTTCACCTACGGAAACCTTGTTACGACTTTTAC
>ccba12642b4c893c9351792f4414d793
AGAGCCAAGAGATCCGTTGTTAAAAGTTTTATTATGTTATAATAATGATTACATTGGTTACATTGTTGTTTGATAAGATCGTCAAGACACCAGGAGTCCCGAAAGACTCAAGGGTCCGACTGTGCACAGGTGTTTATGGATATGAAGGGTGAGAGGCAGAGCCTACTCAGAATTCATTAATGATCCTTCCGCAGGTTCACCTACGGAAACCTTGTTACGACTTT
>0e9e64c3a13d0ce6751cc6c538e027f1
CGAGAGCCAAGAGATCCGTTGTTGAAAGTTGTATTTAGAATTATATATTCGAAATAGCTTCAGACAAAAAATTTACAATAAAAGGTTGGTATTATGCTGCCGAGTCGAAAAAACGACTCGGAGCAAACATTGCACACAAGGTGAGTACTTGTTTAAAAAGTGCAGTAAAACACTTATTATGAATGATCCTTCCGCAGGTTCACCTACGGAAACCTTGTTACGACTTTTA
>23b3e01f03bc337fc057c3e014fa4d67
CCAGAACCAAGAGATCCGTTGTTGAAAGTTTTAACTATTATATAGTACTCGGACGACACTGTAAAACAGGGTTTAAGGTTCTCTGGCGGGCGCGCACCAGCCGGGGCCGGTGGCCAAAAGGCGGCCCGCCAAAGCAACAAAGGCAAGGTATACAAAGGGTGGGAGGTCTACCCCGAAGGGCATGAACTCTGTAATGATCCTTCCGCAGGTTCACCTACGGAAACCTTGTTACGACTTTTA
>c02a62e211a1cc3bc26d90dc9c313d3f
GCGAGAACCAAGAGATCCGTTGTTGAAAGTTTTAACGATTTACTTTTCGTATACTGACAGAAGTTTACAGAAATGGTTTCATGGTGGGCCTCAGACGGGCTGACAGCACGAAGCATGCCGCCGAAGCAACAGGAAGGTTCACAATGGTTTGAAGTAACGAGTACCACCGCATCCCATGAAGGGCGCTGCATGTGGCATTACGTACGGATTAGAGCCCCGGAGGCTGGTCCACCCGGATACTGGATCCAGGGTGAAGGATTTTTAATGATCCTTCCGCAGGTTCACCTACGGAAACCTTGTTACGACTTTTAC
>7b17efa3def5b94811ce233f5cfaa42b
AGAACCAAGAGATCCGTTGTTGAAAGTTTTAACTATTATATAGTACTCAGACATCATGTATTTCAAGAGTTGTGGTCCTCTGGCAGGCACTCAGCAGCCGAGGCCGCTGGCACGAGGCGTCCTGCCAAAGCAACAAAGGTAATTTATTCAAGGGTGGAGGTCTGAACCGAGCTTCTCCGAGAGGCCCGACGTCTCTAAACCCTCCGAGGAGGGTAACCCCCAGGATTGCTCCCGGGGCGCTGACTGTTCATTGCTCTATTAATGATCCTTCCGCAGGTTCACCTACGGAAACCTTGTTACGACTTT
>f602144ab10ef91cc65836fcbbac3402
TAAAAGTCGTAACAAGGTTTCCGTAGGTGAACCTGCGGAAGGATCATTACAAATCCATCCACGTCTCTCTCTGAGACCACGTTGAAATGTTCCCCAGACCAGGAGGGTCTCCGCTTCCTTTCCGGCTGCCTTGACTTCCCGTCTTGGTGCGCCTGCCTGGGAGAGGAGGCCTCCCCTGGCCTGGGCTGTGAAACGAGTGTTACTTTGTTGCCCAAATGTATCTTGATTTCCATCAAACGAAAACTTGTACAACTTATAACAATGGATCTCTAGGCTCTTG
>05913f19c906d7052713df12218cf059
AGAACCAAGAGATCCGTTGTTAAAAGTTTTGATTATTTGCTTGTGTCACTCAGAAGAAACGTCGTTAAATCAGAGTTTGGTTATCCTCCGGCGGGCGCCCCACCCGCGGACGGGAGAGGGCCGGGAGACGTCCTTTTTAGGGGACGCCTACCCGCCGAAGCAACAGTTAAGGTATGTTCACAAAGGGTTGATGAGCGGTAACTCAGTAATGATCCCTCCGCTGGTTCACCAACGGAGACCTTGTTACGACTTT
>0f3fbbfadd2eefdaedd52052ca3c4efb
GCCAGAACCAAGAGATCCGTTGTTGAAAGTTTTAACTATTATATAGTACTCAGACATCATGTATTTCAAGAGTTGTGGTCCTCTGGCAGGCACTCAGCAGCCGAGGCCGCTGGCACGAGGCGTCCTGCCAAAGCAACAAAGGTAATTTATTCAAGGGTGGAGGTCTGAACCGAGCTTCTCCGAGAGGCCCGACGTCTCTAAACCCTCCGAGGAGGGTAACCCCCAGGATTGCTCCCGGGGCGCTGACTGTTCATTGCTCTATTAATGATCCTTCCGCAGGTTCACCTACGGAAACCTTGTTACGACTTTTAC
>19845528e627faaad1b38e29667e73e4
CAAGAGCCTAGAGATCCATTGTTATAAGTTGTACAAGTTTTCGTTTGATGGAAATCAAGATACATTTGGGCAACAAAGTAACACTCGTTTCACAGCCCAGGCCAGGGGAGGCCTCCTCTCCCAGGCAGGCGCACCAAGACGGGAAGTCAAGGCAGCCGGAAAGGAAGCGGAGACCCTCCTGGTCTGGGGAACATTTCAACGTGGTCTCAGAGAGAGACGTGGATGGATTTGTAATGATCCTTCCGCAGGTTCACCTACGGAAACCTTGTTACGACTTTTA
>c84d8064d1c01921b440f430191ebe16
TAAAAGTCGTAACAAGGTTTCCGTAGGTGAACCTGCGGAAGGATCATTAAAGAGACGTTGCCCTTCGGGGTCGACCTCCCACCCTATGTTTATCATACCTCTGTTGCTTTGGCAGGCCCGTCTTCGGACCACCGGCTCCGGCCGGTCCGTGCCTGCCAGAGGACCTAAAACTCTGTTTGTTAATGCAGTCTGAGTACTATATAATAGTTAAAACTTTCAACAACGGATCTCTTGGTTCTGG
>f55f72f8873f9d0baad56810d86c5fe9
GCCAGAACCAAGAGATCCGTTGTTGAAAGTTTTGATTCATTTGTTTTTTGCCTTTCGGCCACTCAGAAGAATACTGCTTTCGCAAAATCAAGAGTTTGTGGTCTCCGGCGGGCGCGTGGTCCCGGGAGCCCGCTGGGGGCAACCCGGCGCGACACCGCCGAAGCAACATAAAGGTAGGTTCACATAGGGTTGGGAGTTGATAAACTCGATAATGATCCCTCCGCTGGTTCACCAACGGAGACCTTGTTACGACTTTTAC
>54f039c8926266cc8fa69e248e485e98
CCAGAACCAAGAGATCCGTTGTTGAAAGTTTTAATTTATTTGCTTGTATTACTCAGAAGATACTCATGAAGACAAGAGTTTGGGTCCTCCGGCGGGCGCCTGGGTCCGGGCCCGAGGGCGCCGGGGCGATCCCGCCGAAGCAACAATAGGTATGTTCACAGGGGTTTGGGAGTTGTAAACTCGGTAATGATCCCTCCGCTGGTTCACCAACGGAGACCTTGTTACGACTTTTA
>6d7e500ce1691781b311c99b5e6e0bdb
GCGAGAGCCAAGAGATCCGTTGTTGAAAGTTTTTTTTTGTTTTTTATTTCATGACATACTTTGACTAATGTTTAAAATGAAGCCGCAAGGTAGTTTCACTCGAAAGTTCCATTACCTCGCCATCAAGTGCACAGTGTTAGAAGTGGAGGTCAGGCTCTACAAGTAGACGCCCTATAATTCACTAATGATCCTTCCGCAGGTTCACCTACGGAAACCTTGTTACGACTTTTAC
>b4561fd867dbf84dad7b40d2b8a1104f
AAAAGTCGTAACAAGGTTTCCGTAGGTGAACCTGCGGAAGGATCATTAACGTGCATCTAAAATCTTACCGACTGTGAATCTAAACCAACCATATGTTTTTTTTTCTATCTTCGGATAGAAAATACACCACATAAACCTTAAACCAATTCATTCTGAAACCTAGTTCCTAGCTTTACTGCTAAAGAACTAACTAAAATCGACGACTTTTAACGATGGATCTCTAGGCTCGT
>f29085b7d791a8d4549a373d5fc5e73b
GTAAAAGTCGTAACAAGGTCTCCGTTGGTGAACCAGCGGAGGGATCATTACAGAGCTTAACAACTCCCAAACCCCTGTGAACATACCACCGTTGCTTCGGCGGGTACGCCCCGGGCGCGCGCAAGCGTGCCCCGGAACCAGGCGCCCGCCGGGGGAAACAAACTCTTGTCTTACTTTTGTATCGTCTGAGTGGATTATTAAATAAATCAAAACTTTCAACAACGGATCTCTTGGCTCTGGC
>8022396f2e9b16d96c399beffe4c26fa
CCAGAACCAAGAGATCCGTTGTTGAAAGTTTTAACTATTATATAGTACTCAGACGACACTTTAATTCAGAATTTAGGGTTCTCTGGCGGGCACTCACCAGCCGAAGCCGGTGGACGATGCGACCCGCCAAAGCAACAAAGGTATGTATTCAAGGGTGGGAGATCTACCCGTTAGGGCATGAACTCTGTAATGATCCTTCCGCAGGTTCACCTACGGAAACCTTGTTACGACTTTTA
>ff6b17351e77361a83e030eea25e76fa
CGAGAGCCAAGAGATCCGTTGTTGAAAGTTGTATTTTGAATTAAGTATTCATAATAGTTTTTCAGACAAAGTGGTTCAAGGTTATAGGTTGGTGTAGGTGTTTCTCCGAAAAGAAACACAACATTGCACACAAGGTGAGTACTATTTTTAAAAAGTGCAGTAAAACACTTATTATGAATGATCCTTCCGCAGGTTCACCTACGGAAACCTTGTTACGACTTTTA
>d0c24a18350e59bbb0143f63dedc3d53
CCAGAACCAAGAGATCCGTTGTTGAAAGTTTTAACTATTATATAGTACTCAGACTGCATTAACAAACAGAGTTTTAGGTCCTCTGGCAGGCACGGACCGGCCGGAGCCGGTGGTCCGAAGACGGGCCTGCCAAAGCAACAGAGGTATGATAAACATAGGGTGGGAGGTCGACCCCGAAGGGCAACGTCTCTTTAATGATCCTTCCGCAGGTTCACCTACGGAAACCTTGTTACGACTTTTA
>48cfdf54dc6765441bcd298245c3ddda
AGAACCAAGAGATCCGTTGTTGAAAGTTTTATATTGCGATTACGTTTTTAGGACGTTCTCTATAGTCAAGATTTTAGAGAAAAGGTAAGCCATCCGTCCATAGGGTCGGCAGCGAGCGGAGGGGATGAGTCCAACCTCCTCCCGCTTAAGCGTCCGTCGGATCGGGGGCAGGGTAGGATAGACACGGATGGGAGATGGGGCCCGGTGGGACCCTCACTCGTTAATGATCCTTCCGCAGGTTCACCTACGGAAACCTTGTTACGACTTT
>0f13a5b375310da5599a2081ca191fae
GTAAAAGTCGTAACAAGGTTTCCGTAGGTGAACCTGCGGAAGGATCATTAACGAGTGTGCGGGTCCCTCCGGGCCCCATCTCCCATCCTTGACTACCCTACCCCGACATCGTCACGCACACGCGGCCCCCGGGGGGGACTTTCCCCCCGACCGGTGCCCGTGCCGCGGGTGGATGAACGAGCTCTTCTCCCCATTCTTTGACTACAGCAGACGTCTTAAAAACGTAACCATTAATAAAACTTTCAACAACGGATCTCTTGGTTCTGGC
>4ab49bde25fa4dfdfd5b8bbd9f4bae79
CAGAACCAAGAGATCCGTTGTTGAAAGTTTTATTAATGGTTACGTTTTTAAGACGTCTGCTGTAGTCAAAGAATGGGGAGAAGAGCTCGTTCATCCACCCGCGGCACGGGCACCGGTCGGGGGGAAAGTCCCCCCCGGGGGCCGCGTGTGCGTGACGATGTCGGGGTAGGGTAGTCAAGGATGGGAGATGGGGCCCGGAGGGACCCGCACACTCGTTAATGATCCTTCCGCAGGTTCACCTACGGAAACCTTGTTACGACTTTT
>2fb543c2503b9e85b5e31ded85efa710
AAAAGTCGTAACAAGGTTTCCGTAGGTGAACCTGCGGAAGGATCATTAACAAATCATGTTGCATGTCGAGCCCGCAAGGGACCTCGTACATGTATATATACCCCGAGTCTGATGATCCTCACGGATTGTCGGCTTTGGTTGGGCAGGCTAGGCTTTCGGGCCTGGACTGCTCCGGACAGTGTGCTTGGAGACACCTTTAGGGGTGACTTTGGGTGCCTGGCCACATAGACGCTTATTAGTTTGACAGAGTTTAGGTTGAAACCAATAAAAATGACAACTTTTAACAATGGATCTCTTGGCTCTT
>047fa1ed9c6c243ecde77178c12e5216
GCGGGAACCAAGATATCCGTTGCTAAGAGTTGTTTTGGTTTCGTATTTTTGACGCTCGAAAGCAGTCAAGATTAGTACAGTTGTTTGAAAAAGGTGTTAAAAAAAGGCAGGAGAACGTGAATTCTCTCACCAGATACGACCATTTTTAATCCCCAGTCCCGCAAAGGACTTTACCGGGGCCGGCTCGTACGACATGTGCACAGGGGGTTGAAACGTGGATACGTATTAATGATCCTTCCGCAGGTTCACCTACGGAAACCTTGTTACGACTTTTAC
>de476d949c2c0a131bc137e995ce0d23
GTAAAAGTCGTAACAAGGTTTCCGTAGGTGAACCTGCGGAAGGATCATTACCGTGGGGTTTCGGCCCCATTGAGATAGCACCCTTTGTTTATGAGTACCCTTGTTTCCTCGGCGGGCTTGCCCGCCATGAGGACATCAAAAACCCTTTGTAGTAGCAGTAACTTCAGTTAATAATAAATATTAAAACTTTCAACAACGGATCTCTTGGTTCTGGC
>f0fe318e52a8b25af9ead1395b1a7691
AAAGTCGTAACAAGGTTTCCGTAGGTGAACCTGCGGAAGGATCATTAAAGAGACGTTGCCCTTCGGGGTATACCTCCCACCCTTTGTTTATTATACCTTTGTTGCTTTGGCGGGCCCGTCCTCGGACCACCGGCTTCGGCTGGTCAGCGCCCGCCAGAGGACCTAAAACTCTGTTTGTTCATATTGTCTGAGTACTATATAATAGTTAAAACTTTCAACAACGGATCTCTTGGTTCT
>4da99daf14d23779c988bccaf010eb25
GTAAAAGTCGTAACAAGGTTTCCGTAGGTGAACCTGCGGAAGGATCATTCATAATCAAGTGTTTTTATGGCACTTTAAATCCATATCCACCTTGTGTGCAATGTCATCTCACTGGGGTTACGTTTGTAAAATTTCGTGATCCGTTTGGGATTTATATCTACTCAGAACTTTAGTCATTTTGTCTGAAACATATTATGAATAACTTAATTCAAAATACAACTTTCAACAACGGATCTCTTGGCTCTCGC
>5f9e93206d6155680bc6f6fd6bb9a7bf
AAAAGTCGTAACAAGGTTTCCGTAGGTGAACCTGCGGAAGGATCATTAGTGAATTTAAGGGCGTAGACTTCGGTCTGGCCTGAACCCCCACTTTCTAACTCTGTGCATTTATCGGTGGAGGACTTGGACAAGCACGATAACGGACTTCGGTAGAATCCGTATGACATGCGAATCCTTGCTTTCTACGGCTCATTTTAAACACTAGTCAAAGTATGTAACGAAATATCGAAATAAAAAAAAACTTTCAACAACGGATCTCTTGGCTCTC
>0313522d8dce555a3f8d09147d3219fd
CGAGAGCCAAGAGATCCGTTGTTGAAAGTTTTTTTTTATTTCGATATTTCGTTACATACTTTGACTAGTGTTTAAAATGAGCCGTAGAAAGCAAGGATTCGCATGTCATACGGATTCTACCGAAGTCCGTTATCGTGCTTGTCCAAGTCCTCCACCGATAAATGCACAGAGTTAGAAAGTGGGGGTTCAGGCCAGACCGAAGTCTACGCCCTTAAATTCACTAATGATCCTTCCGCAGGTTCACCTACGGAAACCTTGTTACGACTTTTA
>a06b7a481e10fa83d817ac38e8d61b05
GTAAAAGTCGTAACAAGGTTTCCGTAGGTGAACCTGCGGAAGGATCATTAATGAGTTAGGGTCTCCTGGGCCCGACCTCCAACCCTTTGTATAACCACCACGTTGCTTTGACGGGCCCGTCTTTCATCAGACCGCCGGGGGTTTAACCTCTGGCCCGCGCCTGTCAATTGCCTTTTAACAAATTCTTTTTAATCATGTCAAATCTGAAAATAGTTAAATAAACTAAAACTTTCAACAACGGATCTCTTGGTTCTGGC
>10375914c53d2ffa335139781162be30
AGAACCAAGAGATCCGTTGTTGAAAGTTTTAACTATTATATAGTACTCAGACAATATGAACAAACAGAGTTTTAGGTCCTCTGGCGGGCGCTGACCAGCCGAAGCCGGTGGTCCGAGGACGGGCCCGCCAAAGCAACAAAGGTATAATAAACAAAGGGTGGGAGGTATACCCCGAAGGGCAACGTCTCTTTAATGATCCTTCCGCAGGTTCACCTACGGAAACCTTGTTACGACTTT
>7c726f3de765794961ebe90ccfcc286d
TAAAAGTCGTAACAAGGTTTCCGTAGGTGAACCTGCGGAAGGATCATTCATAATAAGTGTTTTATGGCACTTTTTAAATCCATATCCACCTTGTGTGCAATGTCGGTTGGTCTTCTTCATGGAGATCGACCAAACATCAACCTAATTTTTAACTCTTTGTCTGAAAAATATTATGAATAAATAATTCAAATACAACTTTCAACAACGGATCTCTTGGCTCTCG
>beb616c02e9fee347d3331d09b7e7770
TAAAAGTCGTAACAAGGTCTCCGTTGGTGAACCAGCGGAGGGATCATTACCGAGTTTACAACTCCCAAACCCCTGTGAACATACCTATTGTTGCTTCGGCGGGATCGCCCCGGCGCCCTCGGGCCCGGACCCAGGCGCCCGCCGGAGGACCCAAACTCTTGTCTTCATGAGTATCTTCTGAGTAATACAAGCAAATAAATTAAAACTTTCAACAACGGATCTCTTGGTTCTGG
>fda11a215744d9fe0221e9a6bfd15425
GCGAGAGCCAAGAGATCCGTTGTTGAAAGTTGTATTTTGAATTAAGTTATTCATAATATGTTTCAGACAAAATGACTAAAGTTCTGAGTAGATATAAATCCCAAACGGATCACGAAATTTTACAAACGTAACCCCAGTGAGATGACATTGCACACAAGGTGGATATGGATTTAAAGTGCCATAAAAACACTTGATTATGAATGATCCTTCCGCAGGTTCACCTACGGAAACCTTGTTACGACTTTTAC
>920be6084fab5ffb43408c2fb5d95afd
TAAAAGTCGTAACAAGGTTTCCGTAGGTGAACCTGCGGAAGGATCATTCATAATAAGTGTTTTACTGCACTTTTTAAACAAGTACTCACCTTGTGTGCAATGTTTGCTCCGAGTCGTTTTTTCGACTCGGCAGCATAATACCAACCTTTTATTGTAAATTTTTTGTCTGAAGCTATTTCGAATATATAATTCTAAATACAACTTTCAACAACGGATCTCTTGGCTCTCG
>8547e0675bde4ac1772c7d3c27c61c67
AGAGCCAAGAGATCCGTTGTTGAAAGTTGTATTTTGAATTAAGTTATTCATAATATGTTTCAGACAAAATGACTAAAGTTCTGAGTAGATATAAATCCCAAACGGATCACGAAATTTTACAAACGTAACCCCAGTGAGATGACATTGCACACAAGGTGGATATGGATTTAAAGTGCCATAAAAACACTTGATTATGAATGATCCTTCCGCAGGTTCACCTACGGAAACCTTGTTACGACTTT
>5f6fa9a3fed0a6c99c0c33fd438ed856
CGAGAGCCAAGAGATCCGTTGTTGAAAGTTGTATTTTGAATTAAGTTATTCATAATATGTTTCAGACAAAATGACTAAAGTTCTGAGTAGATATAAATCCCAAACGGATCACGAAATTTTACAAACGTAACCCCAGTGAGATGACATTGCACACAAGGTGGATATGGATTTAAAGTGCCATAAAAACACTTGATTATGAATGATCCTTCCGCAGGTTCACCTACGGAAACCTTGTTACGACTTTTA
>f85628a2dfe6a9e459306a24d32d3b24
GTAAAAGTCGTAACAAGGTTTCCGTAGGTGAACCTGCGGAAGGATCATTCATAATCAAGTGTTTTTATGGCACTTTAAATCCATATCCACCTTGTGTGCAATGTCATCTCACTGGGGTCACGTTTGTAAAATCTCGTGATCCGTTTGGGATTTATATCTACTCAGAACTTTAGTCATTTTGTCTGAAACATATTATGAATAACTTAATTCAAAATACAACTTTCAACAACGGATCTCTTGGCTCTCGC
>e74707da9013d556ed7bd4952095f5db
TAAAAGTCGTAACAAGGTTTCCGTAGGTGAACCTGCGGAAGGATCATTAGTGAATTATAGGGCGTCTACTTGTAGAGCCTGACCTCCACTTCTAACACTGTGCACTTGATGGAAAGGTAATTAGATTGAGCCTTCGGGCTTATGAAGAGAACCTTTCGGCTTCATTTTAAACATTAGTCAAAGTATGTAAAGAAATTTAAAACAAAAAAAAACTTTCAACAACGGATCTCTTGGCTCTCG
>c76ae02990dc9cc11dae8699bbc87d20
AAAGTCGTAACAAGGTTTCCGTAGGTGAACCTGCGGAAGGATCATTCATAATCAAGTGTTTTTATGGCACTTTAAATCCATATCCACCTTGTGTGCAATGTCATCTCACTGGGGTTACGTTTGTAAAATTTCGTGATCCGTTTGGGATTTATATCTACTCAGAACTTTAGTCATTTTGTCTGAAACATATTATGAATAACTTAATTCAAAATACAACTTTCAACAACGGATCTCTTGGCTCT
>e0b539627b0068de4667c663d8f995a6
TAAAAGTCGTAACAAGGTTTCCGTAGGTGAACCTGCGGAAGGATCATTACAGAGTTCATGCCCTTCGGGGTAGACCTCCCACCCTTTGTATACCTTGCCTTTGTTGCTTTGGCGGGCCGCCTTTTGGCCACCGGCCCCGGCTGGTGCGCGCCCGCCAGAGAACCTTAAACCCTGTTTTACAGTGTCGTCCGAGTACTATATAATAGTTAAAACTTTCAACAACGGATCTCTTGGTTCTGG
>46acbc7462fb6af78d4e719a7266f29c
GTAAAAGTCGTAACAAGGTAACCGTAGGTGAACCTGCGGTTGGATCATTAACAATTTTGGGCTTTAGAGCTCTTAATACTGGGGCCGCCTTAAAACGGCCTTGGTCAACACTTGTGAACTATAGATGCTACCGCATTCTTAACCCCTTTATAAAACCCGTCTTAATCAAATAACAAAATTTGAAACAACTTTTGACAACGGATCTCTTGGCTCTCGC
>3da23de6ab580286728568304364c440
TAAAAGTCGTAACAAGGTTTCCGTAGGTGAACCTGCGGAAGGATCATTAGTGAATTTTAGGGTGCTCTTCCTCAGCTGTTTAACCGGCCGAGTGAAGAGGCCTGACCTCCACTCTCCAACACTGTGCACACTTCGGCATTGCGAACGCTGCTTGTCAGCTAGTAGCTTTGCGGCTTCATTTTAACACTAGTCAAAGAATGTAAAAAAACCATAACAAAGAAAAACTTTCAACAACGGATCTCTTGGCTCTCG
>b01127c504f39607f34e189d21fea245
AAAAGTCGTAACAAGGTTTCCGTAGGTGAACCTGCGGAAGGATCATTAACGAGTGTGCGGGTCCCTCCGGGCCCCATCTCCCATCCTTGACTACCCTACCCCGACATCGTCACGCACACGCGGCCCCCGGGGGGGACTTTCCCCCCGACCGGTGCCCGTGCCGCGGGTGGATGAACGAGCTCTTCTCCCCATTCTTTGACTACAGCAGACGTCTTAAAAACGTAACCATTAATAAAACTTTCAACAACGGATCTCTTGGTTCTG
>e7134d3170fa71df18b6e05e8acef71c
AAAGTCGTAACAAGGTTTCCGTAGGTGAACCTGCGGAAGGATCATTAGTGAATTATAGGGCGTCTACTTGTAGAGCCTGACCTCCACTTCTAACACTGTGCACTTGATGGAAAGGTAATTAGATTCAGCCTTCGGGCTTATGAAGAGAACCTTTCGGCTTCATTTTAAACATTAGTCAAAGTATGTAAAGAAATTTAAAACAAAAAAAAACTTTCAACAACGGATCTCTTGGCTCT
>a90d166c9130173a9d7b516dfce38cbd
ACGAGCCTAGAGATCCATCGTTAAAAGTCGTCGATTTTAGTTAGTTCTTTAGCAGTAAAGCTAGGAACTAGGTTTCAGAATGAATTGGTTTAAGGTTTATGTGGTGTATTTTCTATCCGAAGATAGAAAAAAAAACATATGGTTGGTTTAGATTCACAGTCGGTAAGATTTTAGATGCACGTTAATGATCCTTCCGCAGGTTCACCTACGGAAACCTTGTTACGACTTTT
>0458ca0c978e49c7474131f797359bb1
GTAAAAGTCGTAACAAGGTCTCCGTTGGTGAACCAGCGGAGGGATCATTACGAGAGTGTAACAACTCCCAACCCACTGTTTACCTACCCGTCCAACGTGCTTCGGCAGGCAGCCCTGTGGGACAGAGCCTCGCCCCCCTCGCGGGGGGTGCCTGCCGCCGGCCAACCAAAACTCTAGCTGTTTTAGTACCATCTGAGTCTTATACAAAATAAACAAAACTTTCAACAACGGATCTCTTGGTTCTGGC
>35718a8b101c3142c1959b52abccc924
GTAAAAGTCGTAACAAGGTTTCCGTAGGTGAACCTGCGGAAGGATCATTACAGTAGTCACCCGGGACGCCGCAAGGCCTCCCGGGTAACCTACCACCCTTTGTTTATTACACTTTGTTGCTTTGGCAAGCCTGCCCTCGGGCTGCTGGCTCCGGCCGGCGAGCGCTTGCCAGAGGACCTAAACTCTGTTTGTCTATACTGTCTGAGTACTATATAATAGTTAAAACTTTCAACAACGGATCTCTTGGTTCTGGC
>faacbf628dda6ebbd5df5345ceee6480
TAAAAGTCGTAACAAGGTTTCCGTAGGTGAACCTGCGGAAGGATCATTCATAATCAAGTGTTTTTATGGCACTTTAAATCCATATCCACCTTGTGTGCAATGTCATCTCACTGGGGTTACGTTTGTAAAATTTCGTGATCCGTTTGGGATTTATATCTACTCAGAACTTTAGTCATTTTGTCTGAAACATATTATGAATAACTTAATTCAAAATACAACTTTCAACAACGGATCTCTTGGCTCTCG
>43c12794f48beb4fade3e4b1404f1797
GTAAAAGTCGTAACAAGGTTTCCGTAGGTGAACCTGCGGAAGGATCATTACAGAGTTCATGCCCTAACGGGTAGATCTCCCACCCTTGAATACATACCTTTGTTGCTTTGGCGGGTCGCATCGTCCACCGGCTTCGGCTGGTGAGTGCCCGCCAGAGAACCCTAAATTCTGAATTAAAGTGTCGTCTGAGTACTATATAATAGTTAAAACTTTCAACAACGGATCTCTTGGTTCTGGC
>4d4614941369cdba7c6e2dc012b37cdd
GCGAGAACCAAGAGATCCGTTGTTGAAAGTTTTGAATAATTCAATTTTTCAATTTTCAGACTCAGGTTAATAATAAAAGGTTTTGATTAAATCCTCTGGCCCCGAAGGACCAAAGCAAAAAATTACAATAGTTCACAGGTGTTAAGGATAAAAATGTCCGAAGACAATTTCGTTAATGATCCTTCCGCAGGTTCACCTACGGAAACCTTGTTACGACTTTTAC
>ee6d3706b42e673df947333692480aa3
GCCAGAACCAAGAGATCCGTTGTTGAAAGTTGTAATTATTAAATTTTTCAGACGCTGATTTAAAATTAAAAGGGTTATAGGTTGTCCAGCTGGCAGGCAAGCCTGCCAAGGAAACTTGGGTACTCAAAAGACAAGGAAGGAGAGAAGGGACCGAAATCCCCCTCATAACAGTGGAAATCCACCGAAATTAATGATCCTTCCGCAGGTTCACCTACGGAAACCTTGTTACGACTTTTAC
>7bd8c057729e2ba177b639711e3cc257
GTAAAAGTCGTAACAAGGTTTCCGTAGGTGAACCTGCGGAAGGATCATTAACGAAATTGTCTTCGGACATTTTTATCCTTAACACCTGTGAACTATTGTAATTTTTTGCTTTGGTCCTTCGGGGCCAGAGGATTTAATCAAAACCTTTTATTATTAACCTGAGTCTGAAAATTGAAAAATTGAATTATTCAAAACTTTCAACAACGGATCTCTTGGTTCTCGC
>204b1d872f3b4a18bbdb55b881ace0b8
CAGAACCAAGAGATCCGTTGTTGAAAGTTTTAGTTATTTGTTTGATATTTAGACATCACTGCTCAACGATTTTGTGGGGCCTACTGACGGGCACGGACCAGAGGACAAACCCCCGGCGGTCCAGTCAAGGACGGGCCCGTCAAAGCAACGTGGTAGTATAGGCAGGGGTTGGAGATGGGGCCCAAGGGACCCGTACTCGATAATGATCCTTCCGCAGGTTCACCTACGGAAACCTTGTTACGACTTTT
>aeffbc059855d1fce54ebe9d17e2995f
GCCAGAACCAAGAGATCCGTTGTTGAAAGTTTTAACTATTATATAGTACTCAGACAATATGAACAAACAGAGTTTTAGGTCCTCTGGCGGGCGCTGACCAGCCGAAGCCGGTGGTCCGAGGACGGGCCCGCCAAAGCAACAAAGGTATAATAAACAAAGGGTGGGAGGTATACCCCGAAGGGCAACGTCTCTTTAATGATCCTTCCGCAGGTTCACCTACGGAAACCTTGTTACGACTTTTAC
>0d9798089ccc128f1edf7932a82db550
CAGAACCAAGAGATCCGTTGTTGAAAGTTGTAATTATTAAGTTTTTTCAGACGCTGATTGAAAATTAAAAAGGTTATAGTTTTGTCCAATCGGCGGGCAAGCCCGCCGAGGAAACAAGAGTGCGCAAAAGACAAGGGTTCAGACAGAGTGCCTGCCGCTCATCAGTAATTAAACTATGCGGACTTACAGCGACTCCCGACCAGTAGCAAGCTACTGAATTGTAATGATCCTTCCGCAGGTTCACCTACGGAAACCTTGTTACGACTTTT
>36df48be1689a09592af505186aa15c6
AAAGTCGTAACAAGGTTTCCGTAGGTGAACCTGCGGAAGGATCATTACCAGAGAGGAGCCAGTTCTCCTCGGGGCTCGGCCCCGCGGGCTCCGTCCCGTTTCTCCCCCCCGTGTCTACCTACCTTTGTTGCTTTGGCGGGCCGGGGGCCTCTGCCCCCCCCCACGGCTTGGACGGTGGCCTCGCGTTCGCGCGGATGGCCACCGCCGGCGGGGGTTGTGCCCGTCCATCGCCCTTATCCAACCCTGTTTATCAGTGTCGTCCGAGTCCACAAGAACAATCGTGAAAACTTTCAACAACGGATCTCTTGGTTCT
>aaa9e777c72b61d3b8ed50858c89c9aa
AGAACCAAGAGATCCGTTGTTGAAAGTTTTAACTATTATATAGTACTCAGACAATATTAACAAACAGAGTTTTAGGTCCTCTGGCAGACACTGACCAGCCGGAGCCGGTGGGCCGAAGCCGGGTCTGCCAAAGCAACAAAGGTATAAATAAACAAAGGGTGGGAGGTATACCCCGAAGGGCAACGTCTCTTTAATGATCCTTCCGCAGGTTCACCTACGGAAACCTTGTTACGACTTT
>87d640b914b4f06d5193fa4a2e356056
GCCAGAACCAAGAGATCCGTTGTTGAAAGTTTTGTTTATTTTGTATAAGACTCAGATGGTACTAAAACAGCTAGAGTTTTGGTTGGCCGGCGGCAGGCACCCCCCGCGAGGGGGGCGAGGCTCTGTCCCACAGGGCTGCCTGCCGAAGCACGTTGGACGGGTAGGTAAACAGTGGGTTGGGAGTTGTTACACTCTCGTAATGATCCCTCCGCTGGTTCACCAACGGAGACCTTGTTACGACTTTTAC
>dd62712b1c0f7856bb49b644294616c6
AAAAGTCGTAACAAGGTCTCCGTTGGTGAACCAGCGGAGGGATCATTATCGAGTTTATCCAACTCCCAACCCTATGTGAACCTACCTTTATGTTGCTTCGGCGGTCTCGCGCCGGGTTGCTCCCCTGGGGGCTCCCGGGACCACGCGTCCGCCGGAGACCACAAACTCTTGATTTTGCGAAAGCAGTATTATTCTGAGTGGCCGAAAGGCAAAAAACAAATGAATCAAAACTTTCAACAACGGATCTCTTGGTTCTG
>1ec8a5d5d70a38b976afc531449eedd2
CAGAACCAAGAGATCCGTTGTTGAAAGTTTTAACTATTTTATAGTACTCAGACGACATTTAATACAGAGTTGTGGTCCTCTGGCGGGCACGATCCAGCCGAAGCCGGTGCTTGCGCGGCCCACCAAAGCAACAAATTGAGATAATCAAGGGTTAGAAGGACCGGTTTCCCGGCTTCATTTTTAATGATCCTTCCGCAGGTTCACCTACGGAAACCTTGTTACGACTTTT
>3cd1469107d7e241d19ca0239c7e7daf
GTAAAAGTCGTAACAAGGTTTCCGTAGGTGAACCTGCGGAAGGATCATTAATTTCGGTGGATTTCCACTGTTATGAGGGGGATTTCGGTCCCTTCTCTCCTTCCTTGTCTTTTGAGTACCCAAGTTTCCTTGGCAGGCTTGCCTGCCAGCTGGACAACCTATAACCCTTTTAATTTTAAATCAGCGTCTGAAAAATTTAATAATTACAACTTTCAACAACGGATCTCTTGGTTCTGGC
>a263f30ccd551d312176043e3f3addaa
GCCAGAACCAAGAGATCCGTTGTTGAAAGTTTTAACTATTATATAGTACTCAGACAGTATAGACAAACAGAGTTTAGGTCCTCTGGCAAGCGCTCGCCGGCCGGAGCCAGCAGCCCGAGGGCAGGCTTGCCAAAGCAACAAAGTGTAATAAACAAAGGGTGGTAGGTTACCCGGGAGGCCTTGCGGCGTCCCGGGTGACTACTGTAATGATCCTTCCGCAGGTTCACCTACGGAAACCTTGTTACGACTTTTAC
>dde714d872da14270f09edcd142bbd4b
GCGAGAGCCAAGAGATCCGTTGTTGAAAGTTGTATTTTGAATTAAGTTATTCATAATATGTTTCAGACAAAATGACTAAAGTTCTGAGTAGATATAAATCCCAAACGGATCACGAGATTTTACAAACGTGACCCCAGTGAGATGACATTGCACACAAGGTGGATATGGATTTAAAGTGCCATAAAAACACTTGATTATGAATGATCCTTCCGCAGGTTCACCTACGGAAACCTTGTTACGACTTTTAC
>6e098001e70424541eb55e98cd0cbce4
AGAACCAAGAGATCCGTTGTTGAAAGTTGTATTTAATTAAAGGACTCGCTGTTTAAAGGCGTGACCATAAACATTCACTAGACTTTTTGAAAGGGTGTATATAAATTACATGGGCCAATTTCTTGACCCACAGATAGGTGCACAGGTGTAGATGAAATGAATAAAAGAAGAGCGTGCACGATGCCTTTGAAAGACCAGCAGCAACTCTGATTTTATTTTTAATTCATTAATGATCCTTCCGCAGGTTCACCTACGGAAACCTTGTTACGACTTT
>66b72c99ea0dfed1309b5d750d9436b3
AGAGCCAAGAGATCCGTTGTTGAAAGTTGTATTTTGAATTGTTTATTCATAATATTTTTCAGACAAAGAGTTAAAAATTAAGTTGATGTTTGGCCAATCTCCATGAAGAAGATCGACTGACATTGCACACAAGGTGGATATGGATTTAAAAAGTGCCATAAAACACTCATTATGAATGATCCTTCCGCAGGTTCACCTACGGAAACCTTGTTACGACTTT
>68030e4e9c0ee0396100e502821aa11f
CGAGAGCCAAGAGATCCGTTGTTGAAAGTTTTTCTTTGTTATGGTTTTTTTACATTCTTTGACTAGTGTTAAAATGAAGCCGCAAAGCTACTAGCTGACAAGCAGCGTTCGCAATGCCGAAGTGTGCACAGTGTTGGAGAGTGGAGGTCAGGCCTCTTCACTCGGCCGGTTAAACAGCTGAGGAAGAGCACCCTAAAATTCACTAATGATCCTTCCGCAGGTTCACCTACGGAAACCTTGTTACGACTTTTA
>ec7810566d4b6fec27e4bbfb9ebd3768
AAAAGTCGTAACAAGGTAACCGTAGGTGAACCTGCGGTTGGATCATTAATGAAATTTAATGGGATCGTGTTCTTTCGAGTTCACGGTCTTTCAACCCCTTGTGAATATGTTATTGTATCTGTGTCTCTTTACGGGACACACCAACCAAATTCTTTATTTTCATTAGCCTAAGAATTCATTATAAAGTTTTAATTGAACTTAACAACTTTTGACAACGGATCTCTTGGCTCTC
>1c7153361a8395875efda337b5d51fd3
CGAGAGCCAAGAGATCCGTTGTCAAAAGTTGTTTCAAATTTATATATTTGATTAAGACTTGTTTTATAAAAAAAGGTGTTAACAAAAAAGACTGGCAAGTTGAGAATAAACTCGGGCTTGCCAGAGACAATAAACGATTCACACAAGGTTGACCTGGACAAACTGTTTTCACAGCCGCCCAAGCGTTTTTAGAAAGCTCTAAAGCTTACATTTAATAATGATCCAACCGCAGGTTCACCTACGGTTACCTTGTTACGACTTTTA
>83579bb6004a01c65414fdea13bec4ee
CGAGAGCCAAGAGATCCGTTGTTGAAAGTTGTATTTGAATTATTTATTCATAATATTTTTCAGACAAAGAGTTAAAAATTAGGTTGATGTTTGGTCGATCTCCATGAAGAAGACCAACCGACATTGCACACAAGGTGGATATGGATTTAAAAAGTGCCATAAAACACTTATTATGAATGATCCTTCCGCAGGTTCACCTACGGAAACCTTGTTACGACTTTTA
>c8dab0b035dcb1aa8217352d94b27874
AAGAGCCAAGAGATCCATTGTTAAAAGTTGTCATTTTTATTGGTTTCAACCTAAACTCTGTCAAACTAATAAGCGTCTATGTGGCCAGGCACCCAAAGTCACCCCTAAAGGTGTCTCCAAGCACACTGTCCGGAGCAGTCCAGGCCCGAAAGCCTAGCCTGCCCAACCAAAGCCGACAATCCGTGAGGATCATCAGACTCGGGGTATATATACATGTACGAGGTCCCTTGCGGGCTCGACATGCAACATGATTTGTTAATGATCCTTCCGCAGGTTCACCTACGGAAACCTTGTTACGACTTTT
>87729fd2377c83e4164deaa04abb4c99
CGAGAGCCAAGAGATCCGTTGTTGAAAGTTTTTTTTTGTTTTAAATTTCTTTACATACTTTGACTAATGTTTAAAATGAAGCCGAAAGGTTCTCTTCATAAGCCCGAAGGCTCAATCTAATTACCTTTCCATCAAGTGCACAGTGTTAGAAGTGGAGGTCAGGCTCTACAAGTAGACGCCCTATAATTCACTAATGATCCTTCCGCAGGTTCACCTACGGAAACCTTGTTACGACTTTTA
>fcc2f34e7b446cb8ef4eac70c12dcfbe
AAAAGTCGTAACAAGGTTTCCGTAGGTGAACCTGCGGAAGGATCATTCATAATCAAGTGTTTTTATGGCACTTTAAATCCATATCCACCTTGTGTGCAATGTCATCTCACTGGGGTTACGTTTGTAAAATTTCGTGATCCGTTTGGGATTTATATCTACTCAGAACTTTAGTCATTTTGTCTGAAACATATTATGAATAACTTAATTCAAAATACAACTTTCAACAACGGATCTCTTGGCTCTC
>9373d9204b5a1ae3a6ea17b0e80a12c4
AAAAGTCGTAACAAGGTTTCCGTAGGTGAACCTGCGGAAGGATCATTATTGAATGAACTTGGCGTGGTTGTTGCTGACCCTCTCGGGGGTATGTGCGCGCCCGTCATCTTTATATCTCCACCTGTGCACCTCTTGTAGACCTGGATAACTTTCCGAGGCAACTCGGTCGGGAGGAATGCTGTAACAAGCTTTCCTTATATTTCCAGGCCTATGTTTTCATATACCCCATAGTATGTAACAGAATGTATCACTAGGCCTAGTGCCTATAAACTATATACAACTTTCAGCAACGGATCTCTTGGCTCTC
>55f09b82a104188a347604b37c17ac32
GTAAAAGTCGTAACAAGGTTTCCGTAGGTGAACCTGCGGAAGGATCATTAACAGATTCTGCTAGTCAGATATCTAACCCCGTGTGAACTGTTCTTTTGACTTGGTGTCTGAGCACTAGATTCTTCAAGACCTTCTTGTCGAATTTACGTCTGGGCACCATCCGTTTTTACCCTTTGACTTTGAATGCCGAGTAAACTACAAAAGACTAGAAAACTTTTAGCAACGGATCTCTAGGCTCTTGC
>ac754d0242247c4650b6fca63976e189
AAAGTCGTAACAAGGTTTCCGTAGGTGAACCTGCGGAAGGATCATTAAAGAGACGTTGCCCTTCGGGGTATACCTCCCACCCTTTGTTTATTTATACCTTTGTTGCTTTGGCAGACCCGGCTTCGGCCCACCGGCTCCGGCTGGTCAGTGTCTGCCAGAGGACCTAAAACTCTGTTTGTTAATATTGTCTGAGTACTATATAATAGTTAAAACTTTCAACAACGGATCTCTTGGTTCT
>5826a0223a5783b80df39e0ac8ec9b17
TAAAAGTCGTAACAAGGTTTCCGTAGGTGAACCTGCGGAAGGATCATTAATTTCGGTGGATTTCCACTGTTATGAGGGGGATTTCGGTCCCTTCTCTCCTTCCTTGTCTTTTGAGTACCCAAGTTTCCTTGGCAGGCTTGCCTGCCAGCTGGACAACCTATAACCCTTTTAATTTTAAATCAGCGTCTGAAAAATTTAATAATTACAACTTTCAACAACGGATCTCTTGGTTCTGG
>3d97b432bd47c7e1966d90dcc69837ed
GAGAGCCAAGAGATCCGTTGTTGAAAGTTGTATTTTGAATTAAGTTATTCATAATATGTTTCAGACAAAATGACTAAAGTTCTGAGTAGATATAAATCCCAAACGGATCACGAAATTTTACAAACGTAACCCCAGTGAGATGACATTGCACACAAGGTGGATATGGATTTAAAGTGCCATAAAAACACTTGATTATGAATGATCCTTCCGCAGGTTCACCTACGGAAACCTTGTTACGACTTTT
>f0d713fa59aeb61a33e8ce09edd65c8c
AAAGTCGTAACAAGGTTTCCGTAGGTGAACCTGCGGAAGGATCATTAATGAATTAAAAATAAAATCAGAGTTGCTGCTGGTCTTTCAAAGGCATCGTGCACGCTCTTCTTTTATTCATTTCATCTACACCTGTGCACCTATCTGTGGGTCAAGAAATTGGCCCATGTAATTTATATACACCCTTTCAAAAAGTCTAGTGAATGTTTATGGTCACGCCTTTAAACAGCGAGTCCTTTAATTAAATACAACTTTCAACAACGGATCTCTTGGTTCT
>4ce5142c372f665d449aa7582cae4e4e
TAAAAGTCGTAACAAGGTAACCGTAGGTGAACCTGCGGTTGGATCATTATTAAATGTAAGCTTTAGAGCTTTCTAAAAACGCTTGGGCGGCTGTGAAAACAGTTTGTCCAGGTCAACCTTGTGTGAATCGTTTATTGTCTCTGGCAAGCCCGAGTTTATTCTCAACTTGCCAGTCTTTTTTGTTAACACCTTTTTTTATAAAACAAGTCTTAATCAAATATATAAATTTGAAACAACTTTTGACAACGGATCTCTTGGCTCTCG
>48043fdfa2bcb00c0d4a77b7c3ef1b15
GAGAGCCAAGAGATCCGTTGCTGAAAGTTGTATATAGTTTATAGGCACTAGGCCTAGTGATACATTCTGTTACATACTATGGGGTATATGAAAACATAGGCCTGGAAATATAAGGAAAGCTTGTTACAGCATTCCTCCCGACCGAGTTGCCTCGGAAAGTTATCCAGGTCTACAAGAGGTGCACAGGTGGAGATATAAAGATGACGGGCGCGCACATACCCCCGAGAGGGTCAGCAACAACCACGCCAAGTTCATTCAATAATGATCCTTCCGCAGGTTCACCTACGGAAACCTTGTTACGACTTTT
>5972db867153d65c8dee4f958a1ceb5a
GCAAGAGCCTAGAGATCCGTTGCTAAAAGTTTTCTAGTCTTTTGTAGTTTACTCGGCATTCAAAGTCAAAGGGTAAAAACGGATGGTGCCCAGACGTAAATTCGACAAGAAGGTCTTGAAGAATCTAGTGCTCAGACACCAAGTCAAAAGAACAGTTCACACGGGGTTAGATATCTGACTAGCAGAATCTGTTAATGATCCTTCCGCAGGTTCACCTACGGAAACCTTGTTACGACTTTTAC
>a29f55dfa8e895cbfd7c17043e794b01
AAAGTCGTAACAAGGTTTCCGTAGGTGAACCTGCGGAAGGATCATTCATAATGAGTGTTTTATGGCACTTTTTAAATCCATATCCACCTTGTGTGCAATGTCAGTCGATCTTCTTCATGGAGATTGGCCAAACATCAACTTAATTTTTAACTCTTTGTCTGAAAAATATTATGAATAAACAATTCAAAATACAACTTTCAACAACGGATCTCTTGGCTCT
>71447ed923f3d8181139ea8bb64dc87d
AAAAGTCGTAACAAGGTTTCCGTAGGTGAACCTGCGGAAGGATCATTACAATTCAGTAGCTTGCTACTGGTCGGGAGTCGCTGTAAGTCCGCATAGTTTAATTACTGATGAGCGGCAGGCACTCTGTCTGAACCCTTGTCTTTTGCGCACTCTTGTTTCCTCGGCGGGCTTGCCCGCCGATTGGACAAAACTATAACCTTTTTAATTTTCAATCAGCGTCTGAAAAAACTTAATAATTACAACTTTCAACAACGGATCTCTTGGTTCTG
>70923623dd35c7076609e0422f7f0a90
AGAGCCAAGAGATCCGTTGTTGAAAGTTTTTTTTTGTTTTAAATTTCTTTACATACTTTGACTAATGTTTAAAATGAAGCCGAAAGGTTCTCTTCATAAGCCCGAAGGCTGAATCTAATTACCTTTCCATCAAGTGCACAGTGTTAGAAGTGGAGGTCAGGCTCTACAAGTAGACGCCCTATAATTCACTAATGATCCTTCCGCAGGTTCACCTACGGAAACCTTGTTACGACTTT
>a07d1d9f113e0bf9e93ca3536981b675
AGAACCAAGAGATCCGTTGTTGAAAGTTTTCACGATTGTTCTTGTGGACTCGGACGACACTGATAAACAGGGTTGGATAAGGGCGATGGACGGGCACAACCCCCGCCGGCGGTGGCCATCCGCGCGAACGCGAGGCCACCGTCCAAGCCGTGGGGGGGGGCAGAGGCCCCCGGCCCGCCAAAGCAACAAAGGTAGGTAGACACGGGGGGGAGAAACGGGACGGAGCCCGCGGGGCCGAGCCCCGAGGAGAACTGGCTCCTCTCTGGTAATGATCCTTCCGCAGGTTCACCTACGGAAACCTTGTTACGACTTT
>f52706b799b6e5b16974d9731ffe12dd
GCCAGAACCAAGAGATCCGTTGTTGAAAGTTTTAACTATTATATAGTACTCAGACGACACTTTAATTCAGAATTTAGGGTTCTCTGGCGGGCACTCACCAGCCGAAGCCGGTGGACGATGCGACCCGCCAAAGCAACAAAGGTATGTATTCAAGGGTGGGAGATCTACCCGTTAGGGCATGAACTCTGTAATGATCCTTCCGCAGGTTCACCTACGGAAACCTTGTTACGACTTTTAC
>3c64a8554dbab694b9443a3fc38fac87
CAGAACCAAGAGATCCGTTGTTGAAAGTTTTAACGATTATATGGGACTTAGACGGCACAGAAAACAGGAGTTAGGGCCTCTGGTCGGCGCGTACCAGCAGAGCCGGTAGCGGGCGGGCCCGCGGCCGACCAAAGCAACAAAGGTATCGTTCACACGGGTGGGAGGTCTACCCCGAAGGGCACGAACTCTGTAATGATCCCTCCGCAGGTTCACCTACGGAGACCTTGTTACGACTTTT
>18c03880f235eb449888722cf21d237a
GAGGAAGTACGAGTCGTAACAAGGTCTCCGTAGGTGAACCTGCGGAGGGATCATTACCGAGTTGTGGAAACACAATCTCCCTTTCTTGTTGTTTGACCGGTTGCCTTGCCTTCGGGCAGGATTATTCTGAATCAGTGTCGTCTGAGTACTTTTATAATACTATAAAACTTTCAACAACGGATCTCTTGGTTCTGGCATCGATGAAGAACGCA
>fb8119fae7239a4187f27f28417ab06a
TAAAAGTCGTAACAAGGTTTCCGTAGGTGAACCTGCGGAAGGATCATTACCGAGTTCATGCCCTTCGGGGTAGATCTCCCACCCTTTGTATACCATACCTCTGTTGCTTTGGCGGGCCGCCTAGCTACTGGCTTCGGCTGGTAAGTGCCCGCCAGAGGACCCAAAACCCTGAATATTAGTGTCGTCTGAGTAAAAAGTTTAATATTTAAAACTTTCAACAACGGATCTCTTGGCTCTGG
>47a1128aca869925af80511d4b952db0
CCAGAACCAAGAGATCCGTTGTTGAAAGTTGTAATTATTAAATTTTTCAGACGCTGATTTAAAATTAAAAGGGTTATAGGTTGTCCAGCTGGCAGGCAAGCCTGCCAAGGAAACTTGGGTACTCAAAAGACAAGGAAGGAGAGAAGGGACCGAAATCCCCCTCATAACAGTGGAAATCCACCGAAATTAATGATCCTTCCGCAGGTTCACCTACGGAAACCTTGTTACGACTTTTA
>982b16399dba6b79ccb6955f0cc3efe2
AAAGTCGTAACAAGGTTTCCGTAGGTGAACCTGCGGAAGGATCATTATCGAGTACGGGTCCCTTGGGCCCCATCTCCAACCCCTGCCTATACTACCACGTTGCTTTGACGGGCCCGTCCTTGACTGGACCGCCGGGGGTTTGTCCTCTGGTCCGTGCCCGTCAGTAGGCCCCACAAAATCGTTGAGCAGTGATGTCTAAATATCAAACAAATAACTAAAACTTTCAACAACGGATCTCTTGGTTCT
>760140e08250d6a99a95fcaaa5007654
AGAGCCAAGAGATCCGTTGTTGAAAGTTGTATTTTGAATTGTTTATTCATAATATTTTTCAGACAAAGAGTTAAAAAAATAAGTTGATGTTTGGCTGATCTTCCAAAAAAGAAAGATCGGCCGACATTGCACACAAGGTGGATATGGATTTAAAAAGTGCCATAAAACACTTATTATGAATGATCCTTCCGCAGGTTCACCTACGGAAACCTTGTTACGACTTT
>44f9e0eb24447c615bd41d739ccec5b2
AAAGTCGTAACAAGGTTTCCGTAGGTGAACCTGCGGAAGGATCATTAATACGTATCCACGTTTCAACCCCCTGTGCACATGTCGTACGAGCCGGCCCCGGTAAAGTCCTTTGCGGGACTGGGGATTAAAAATGGTCGTATCTGGTGAGAGAATTCACGTTCTCCTGCCTTTTTTTAACACCTTTTTCAAACAACTGTACTAATCTTGACTGCTTTCGAGCGTCAAAAATACGAAACCAAAACAACTCTTAGCAACGGATATCTTGGTTCC
>6cc3ca884a1b89a56900a065ff7c96b3
CCAGAGCCAAGAGATCCGTTGTTGAAAGTTTTAAATATTAAACTTTTTACTCAGACGACACTAATATTCAGGGTTTTGGGTCCTCTGGCGGGCACTTACCAGCCGAAGCCAGTAGCTAGGCGGCCCGCCAAAGCAACAGAGGTATGGTATACAAAGGGTGGGAGATCTACCCCGAAGGGCATGAACTCGGTAATGATCCTTCCGCAGGTTCACCTACGGAAACCTTGTTACGACTTTTA
>616c7d30036ca5e9c83894715aed951f
AAAGTCGTAACAAGGTTTCCGTAGGTGAACCTGCGGAAGGATCATTCATAATAAGTGTTTTATGGCACTTTTTAAATCCATATCCACCTTGTGTGCAATGTCGGCCGATCTTTCTTTTTTGGAAGATCAGCCAAACATCAACTTATTTTTTTAACTCTTTGTCTGAAAAATATTATGAATAAACAATTCAAAATACAACTTTCAACAACGGATCTCTTGGCTCT
>34204ab3c626a8c49b300716cc0ffe64
AGAACCAAGAGATCCGTTGTTGAAAGTTTTAGTTATTTGTTTGATATTTAGACATCACTGCTCAACGATTTTGTGGGGCCTACTGACGGGCACGGACCAGAGGACAAACCCCCGGCGGTCCAGTCAAGGACGGGCCCGTCAAAGCAACGTGGTAGTATAGGCAGGGGTTGGAGATGGGGCCCAAGGGACCCGTACTCGATAATGATCCTTCCGCAGGTTCACCTACGGAAACCTTGTTACGACTTT
>b1efd1077dab594ea4bb23017a78e030
TAAAAGTCGTAACAAGGTTTCCGTAGGTGAACCTGCGGAAGGATCATTAATAGAGCAATGAACAGTCAGCGCCCCGGGAGCAATCCTGGGGGTTACCCTCCTCGGAGGGTTTAGAGACGTCGGGCCTCTCGGAGAAGCTCGGTTCAGACCTCCACCCTTGAATAAATTACCTTTGTTGCTTTGGCAGGACGCCTCGTGCCAGCGGCTTCGGCTGCTGAGTGCCTGCCAGAGGACCACAACTCTTGAAATACATGATGTCTGAGTACTATATAATAGTTAAAACTTTCAACAACGGATCTCTTGGTTCTGG
>ff636fcf7bdf02982ff8a3b8ea624cf7
AGAGCCAAGAGATCCGTTGTTGAAAGTTGTATTTTGAATTAAGTATTCATAATAGTTTTTCAGACAAAGTGGTTCAAGGTTATAGGTTGGTGTAGGTGTTTCTCCGAAAAGAAACACAACATTGCACACAAGGTGAGTACTATTTTTAAAAAGTGCAGTAAAACACTTATTATGAATGATCCTTCCGCAGGTTCACCTACGGAAACCTTGTTACGACTTT
>7e11237afbd453523de7bf69d1cded20
GTAAAAGTCGTAACAAGGTTTCCGTAGGTGAACCTGCGGAAGGATCATTACAGAGTTCATGCCCTCACGGGTAGATCTCCCACCCTTGAATACTATACCTTCGTTGCTTTGGCAGGCCGTGGAAACACCATGGGCTCCGGCTGATGCGTGCCTGCCAGAGGAAACAAACTCTGTTTTTAGTGATGTCTGAGTACTATATAATAGTTAAAACTTTCAACAACGGATCTCTTGGTTCTGGC
>22f9113021e35da3f9def3a9d4a632d1
AAAGTCGTAACAAGGTTTCCGTAGGTGAACCTGCGGAAGGATCATTCATAATAAGTGTTTTACTGCACTTTTTAAAAATAGTACTCACCTTGTGTGCAATGTTGTGTTTCTTTTCGGAGAAACACCTACACCAACCTATAACCTTGAACCACTTTGTCTGAAAAACTATTATGAATACTTAATTCAAAATACAACTTTCAACAACGGATCTCTTGGCTCT
>c94fd50a22ee834763b2b00fdb7447b5
GTAAAAGTCGTAACAAGGTTTCCGTAGGTGAACCTGCGGAAGGATCATTAAAGAGACGTTGCCCTTCGGGGTATACCTCCCACCCTTTGTTTATTTATACCTTTGTTGCTTTGGCAGACCCGGCTTCGGCCCACCGGCTCCGGCTGGTCAGTGTCTGCCAGAGGACCTAAAACTCTGTTTGTTAATATTGTCTGAGTACTATATAATAGTTAAAACTTTCAACAACGGATCTCTTGGTTCTGGC
>2ff313b77b4b352227c25d4d0ab3d778
GCCAGAACCAAGAGATCCGTTGTTGAAAGTTTTAACTATTATATAGTACTCAGACATCACTAAAAACAGAGTTTGTTTCCTCTGGCAGGCACGCATCAGCCGGAGCCCATGGTGTTTCCACGGCCTGCCAAAGCAACGAAGGTATAGTATTCAAGGGTGGGAGATCTACCCGTGAGGGCATGAACTCTGTAATGATCCTTCCGCAGGTTCACCTACGGAAACCTTGTTACGACTTTTAC
>9238ceb4902a52808346a34cbe70ee92
GTAAAAGTCGTAACAAGGTTTCCGTAGGTGAACCTGCGGAAGGATCATTAGTGAATTTAAGGGCGTAGACTTCGGTCTGGCCTGAACCCCCACTTTCTAACTCTGTGCATTTATCGGTGGAGGACTTGGACAAGCACGATAACGGACTTCGGTAGAATCCGTATGACATGCGAATCCTTGCTTTCTACGGCTCATTTTAAACACTAGTCAAAGTATGTAACGAAATATCGAAATAAAAAAAAACTTTCAACAACGGATCTCTTGGCTCTCGC
>000b30e4922cbc5d8d2f180850227ea7
AAAAGTCGTAACAAGGTCTCCGTAGGTGAACCTGCGGAGGGATCATTACAGAGTTCGTGCCCTTCGGGGTAGACCTCCCACCCGTGTGAACGATACCTTTGTTGCTTTGGTCGGCCGCGGGCCCGCCCGCTACCGGCTCTGCTGGTACGCGCCGACCAGAGGCCCTAACTCCTGTTTTCTGTGCCGTCTAAGTCCCATATAATCGTTAAAACTTTCAACAACGGATCTCTTGGTTCTG
>130d5eb4fde7bf096efcc49ed47976d2
GCCAGAACCAAGAGATCCGTTGTTGAAAGTTTTAACTATTATATAGTACTCAGACATCACTAAAAACAGAGTTTGTTTCCTCTGGCAGGCACGCATCAGCCGGAGCCTCTGGTGTTTCCACGGCCTGCCAAAGCAACGAAGGTATAATATTCAAGGGTGGGAGATCTACCCGTGAGGGCATGAACTCTGTAATGATCCTTCCGCAGGTTCACCTACGGAAACCTTGTTACGACTTTTAC
>af859f9bed3944535026efdf52bf5b95
TAAAAGTCGTAACAAGGTCTCCGTTGGTGAACCAGCGGAGGGATCATTACCGAGTTTACAACTCCCAAACCCCTGTGAACATACCAATTGTTGCCTCGGCGGATCAGCCCGCTCCCGGTAAAACGGGACGGCCCGCCAGAGGACCCCTAAACTCTGTTTCTATATGTAACTTCTGAGTAAAACCATAAATAAATCAAAACTTTCAACAACGGATCTCTTGGTTCTGG
>c213faa1a320c38c7c04f05d31d9bdaf
GTAAAAGTCGTAACAAGGTTTCCGTAGGTGAACCTGCGGAAGGATCATTACAGAGTTCATGCCCTCACGGGTAGATCTCCCACCCTTGAATATTATACCTTCGTTGCTTTGGCAGGCCGTGGAAACACCAGAGGCTCCGGCTGATGCGTGCCTGCCAGAGGAAACAAACTCTGTTTTTAGTGATGTCTGAGTACTATATAATAGTTAAAACTTTCAACAACGGATCTCTTGGTTCTGGC
>91fd04c35b72a0869149912b97188ac1
AGAACCAAGAGATCCGTTGTTGAAAGTTTTAACTATTAAAATAGTACTCAGACGACATTAACAAAAGAGTTTGGAGTCCTCTGACAGGCGCGGGCCAGCCGAAGCCAGCGGTCCGGAGACGGGCCTGCCAAGGCAACAAAGGTATAGTATACAAAGGGTGGGAGATCTACCCCGAAGGGCACGTTCTCATTAATGATCCTTCCGCAGGTTCACCTACGGAAACCTTGTTACGACTTT
>bb49b25cff8dd0ba6be7b02930400967
CGAGAGCCAAGAGATCCGTTGTTGAAAGTTTTTTTTTATTTCGATATTTCGTTACATACTTTGACTAGTGTTTAAAAATGAGACGCAGAACTTCACGATTGCTCGCTCGATTCCGCCAATAAATGCACAGAGTTGAAAAGTGGAGGGTCGAACTCGCCGAAGCGATGTCCTAATATTCACTAATGATCCTTCCGCAGGTTCACCTACGGAAACCTTGTTACGACTTTTA
>e5d3b907912b0aa998abf8444e5b4809
GTAAAAGTCGTAACAAGGTTTCCGTAGGTGAACCTGCGGAAGGATCATTAACAGATGCTGCTAGTCAGATATCTTACCCCGTGTGAACTGTTCTTTTGACTTGGTGTCCAAGCACTGAATCTTCCAAGACTTTCTTGGCGGATTTACGTCTGGGCACCATCCGTTTTTACCCTTTGACTTTGAATGCCGAGTAAATTACAAAAGACTAGAAAACTTTTAGCAACGGATCTCTAGGCTCTTGC
>5fd49014a73ef52fe1a13656c22a45eb
GCCAGAACCAAGAGATCCGTTGTTGAAAGTTTTAGTTTATTTAACTATTTTCAGATTTGACATGATTAAAAAGAATTTGTTAAAAGGCAATTGACAGGCGCGGGCCAGAGGTTAAACCCCCGGCGGTCTGATGAAAGACGGGCCCGTCAAAGCAACGTGGTGGTTATACAAAGGGTTGGAGGTCGGGCCCAGGAGACCCTAACTCATTAATGATCCTTCCGCAGGTTCACCTACGGAAACCTTGTTACGACTTTTAC
>697ae145d8ccb1c8b16166dde70d14fe
TAAAAGTCGTAACAAGGTTTCCGTAGGTGAACCTGCGGAAGGATCATTAACGAGTGAGGGTCCCACCGGGCCCCATCTCCCATCCGTGTCTATCCTACCCTGCCCCCGATCCGACGGACGCTTAAGCGGGAGGAGGTTGGACTCATCCCCTCCGCTCGCTGCCGACCCTATGGACGGATGGCTTACCTTTTCTCTAAAATCTTGACTATAGAGAACGTCCTAAAAACGTAATCGCAATATAAAACTTTCAACAACGGATCTCTTGGTTCTGG
>9ee517ea483abb468ce0cbec9ddfcbeb
AAAGTCGTAACAAGGTTTCCGTAGGTGAACCTGCGGAAGGATCATTAGTGAATTATAGGGCGTCTACTTGTAGAGCCTGACCTCCACTTCTAACACTGTGCACTTGATGGCGAGGTAATGGAACTTTCGAGTGAAACTACCTTGCGGCTTCATTTTAAACATTAGTCAAAGTATGTAATGAAATAAAAAACAAAAAAAAACTTTCAACAACGGATCTCTTGGCTCT
>1c61dce78c75f3b13d26da4967f8b3d2
GCCAGAACCAAGAGATCCGTTGTTGAAAGTTTTAATATTTATTATTAACTGAAGTTACTGCTACTACAAAGGGTTTTTGATGTCCTCATGGCGGGCAAGCCCGCCGAGGAAACAAGGGTACTCATAAACAAAGGGTGCTATCTCAATGGGGCCGAAACCCCACGGTAATGATCCTTCCGCAGGTTCACCTACGGAAACCTTGTTACGACTTTTAC
>5b4bdae3551c4a75adc1504b6c254731
TAAAAGTCGTAACAAGGTTTCCGTAGGTGAACCTGCGGAAGGATCATTAATACGTATCCACGTTTCAACCCCCTGTGCACATGTCGTACGAGCCGGCCCCGGTAAAGTCCTTTGCGGGACTGGGGATTAAAAATGGTCGTATCTGGTGAGAGAATTCACGTTCTCCTGCCTTTTTTTAACACCTTTTTCAAACAACTGTACTAATCTTGACTGCTTTCGAGCGTCAAAAATACGAAACCAAAACAACTCTTAGCAACGGATATCTTGGTTCCCG
>3127eb2f7d02b42f85c8e7243f3215e5
AAAGTCGTAACAAGGTTTCCGTAGGTGAACCTGCGGAAGGATCATTCATAATAAGTGTTTTATGGCACTTTTTTAAATCCATATCCACCTTGTGTGCAATGTCAGGGTTGGTCTCTTGAAAAAGAGATCAGCCCCAAACATCAACCCAATCTTAACTCTTTGTCTGAAAAATATTATGAATAAAACAATTCAAAATACAACTTTCAACAACGGATCTCTTGGCTCT
>569d6c5840361229b6fda0827ba7f0b3
GTAAAAGTCGTAACAAGGTTTCCGTAGGTGAACCTGCGGAAGGATCATTACCGAGTGAGGGCCCTCTGGGTCCAACCTCCCACCCGTGTTTATTTTACCTTGTTGCTTCGGCGGGCCCGCCTTAACTGGCCGCCGGGGGGCTCACGCCCCCGGGCCCGCGCCCGCCGAAGACACCCTCGAACTCTGTCTGAAGATTGAAGTCTGAGTGAAAATATAAATTATTTAAAACTTTCAACAACGGATCTCTTGGTTCCGGC
>a9cfd52963b08cf5ab151808355e3d55
GTAAAAGTCGTAACAAGGTTTCCGTAGGTGAACCTGCGGAAGGATCATTCATAATCAAGTGTTTTTATGGCACTTTCAAAAATCCATATCCACCTTGTGTGCAATGTCATCTCACTGGAGGTCACGGCTGTAACAATCCGTTGGTCACCTTTGGGATTTATATCTACTCAGAACTTTAGTGATTTTGTCTGAAACATATTATGAATAACTTAATTCAAAATACAACTTTCAACAACGGATCTCTTGGCTCTCGC
>7821ea4b0059bb9dc257fae4d9f565ed
TAAAAGTCGTAACAAGGTTTCCGTAGGTGAACCTGCGGAAGGATCATTAGTGAATTATAGGGCGTCTACTTGTAGAGCCTGACCTCCACTTCTAACACTGTGCACTTGATGGCGAGGTAATGGAACTTTCGAGTGAAACTACCTTGCGGCTTCATTTTAAACATTAGTCAAAGTATGTCATGAAATAAAAAACAAAAAAAAACTTTCAACAACGGATCTCTTGGCTCTCG
>475d2f9783fcec4653d765ce208b9136
GTAAAAGTCGTAACAAGGTAACCGTAGGTGAACCTGCGGTTGGATCATTAATGAATTTCATTGATAACCCTTCTCTACTGCAACGTGTCAAAGCGTGGTGGTGGAGTTGGGTGTTTGGGAGTGACCCTTCAAGGAAGCTCCCTTGCAAACCCCTGTCTTTTATTCAGTGGCAAGCGAGACCTGTCTTGCAAGCCACTGCTTATTAAACTCATGTCCATACCAGTCTTATACCATAAAGAAATTAATCTTTAAACAACTTTTGACAACGGATCTCTTGGTTCTCGC
>bc4d82c8c79fd3b589314d1b672c73d6
TAAAAGTCGTAACAAGGTTTCCGTAGGTGAACCTGCGGAAGGATCATTAACAAATCTGCTATGCGGCCGAGCTCTCGGGCTTGACGCATATATTTACCCCGAGCCTGGCAGCAATGCCGGCTTTGGTTGGGTGGGATGCAAGTCCTGCTCCGGCTGTGTGAGGGCGCAAGTCCTTGCCAGCCACATAGACGCTTGTATGTTTGACAGAGTTACAGTTGTAAAACTAAAATGACAACTTTTAACAATGGATCTCTTGGCTCTTG
>4fff3e7e5ea736c7bb4a4fa7eb96c0eb
AGAACCAAGAGATCCGTTGTTGAAAGTTTTAATTTATTTGCTTGTATTACTCAGAAGATACTCATGAAGACAAGAGTTTGGGTCCTCCGGCGGGCGCCTGGGTCCGGGCCCGAGGGCGCCGGGGCGATCCCGCCGAAGCAACAATAGGTATGTTCACAGGGGTTTGGGAGTTGTAAACTCGGTAATGATCCCTCCGCTGGTTCACCAACGGAGACCTTGTTACGACGCT
>07ef3db341fd1201209f76a04e1319ce
GCAAGAGCCTAGAGATCCGTTGCTAAAAGTTTTCTAGTCTTTTGTAATTTACTCGGCATTCAAAGTCAAAGGGTAAAAACGGATGGTGCCCAGACGTAAATCCGCCAAGAAAGTCTTGGAAGATTCAGTGCTTGGACACCAAGTCAAAAGAACAGTTCACACGGGGTAAGATATCTGACTAGCAGCATCTGTTAATGATCCTTCCGCAGGTTCACCTACGGAAACCTTGTTACGACTTTTAC
>3f650135d1002882ed237d7ad50f86c9
AAAAGTCGTAACAAGGTTTCCGTAGGTGAACCTGCGGAAGGATCATTAACAAATCTGCTATGCGGCCGAGCCCTCGGGCTTGACGCATATATTTACCCCGAGCCTGGCAGCAATGCCGGCTTTGGTTGGGTGGGACGCAAGTCCTGCTCCGGTTGTGTGAGGGCGCAAGTCCTTGCCAGCCACATAGACGCTTGTATGTTTGACAGAGTTACAGTTGTAAAACTAAAATGACAACTTTTAACAATGGATCTCTTGGCTCTT
>fdb160cf186d8c1edbfd57c931497972
AAAGTCGTAACAAGGTTTCCGTAGGTGAACCTGCGGAAGGATCATTAGTGAATTATAGGGCGTCTACTTGTAGAGCCTGACCTCCACTTCTAACACTGTGCACTTGATGGAAAGGTAATTAGATTGAGCCTTCGAGCTCATGAAGAGAACCTTTCGGCTTCATTTTAAACATTAGTCAAAGTATGTAAAGAAATTTAAAACAAAAAAAAACTTTCAACAACGGATCTCTTGGCTCT
>0f6607ad7b7a79fb01ba072af3f0dd55
GGAACCAAGATATCCGTTGCTAAGAGTTGTTTTGGTTTCGTATTTTTGACGCTCGAAAGCAGTCAAGATTAGTACAGTTGTTTGAAAAAGGTGTTAAAAAAAGGCAGGAGAACGTGAATTCTCTCACCAGATACGACCATTTTTAATCCCCAGTCCCGCAAAGGACTTTACCGGGGCCGGCTCGTACGACATGTGCACAGGGGGTTGAAACGTGGATACGTATTAATGATCCTTCCGCAGGTTCACCTACGGAAACCTTGTTACGACTTT
>b2bc84200f8e32c480caa2208adacd1e
GCCAGAGCCAAGAGATCCGTTGTTGAAAGTTTTGATTTATTTAATAATCCACTCAGACGATACAAAAGTAAGACAAGAGTTTGTTTCCCCCGGCGGGCGCCTGGTTCCGGGGCACGCTTGCGCGCGCCCGGGGCGTACCCGCCGAAGCAACGGTGGTATGTTCACAGGGGTTTGGGAGTTGTTAAGCTCTGTAATGATCCCTCCGCTGGTTCACCAACGGAGACCTTGTTACGACTTTTAC
>34c5cb86b9181c9be438359c364352b1
TAAAAGTCGTAACAAGGTTTCCGTAGGTGAACCTGCGGAAGGATCATTAAAAATGAAGCCGGGAAACCGGTCCTTCTAACCCTTGATTATCTCAATTTGTTGCTTTGGTGGGCCGCGCAAGCACCGGCTTCGGCTGGATCGTGCCCGCCAGAGGACCACAACTCTGTATTAAATGTCGTCTGAGTACTATAAAATAGTTAAAACTTTCAACAACGGATCTCTTGGTTCTGG
>cd6e2c844307d6154efde85c9cf04ffc
AAGAGCCAAGAGATCCATTGTTAAAAGTTGTCATTTTAGTTTTACAACTGTAACTCTGTCAAACATACAAGCGTCTATGTGGCTGGCAAGGACTTGCGCCCTCACACAACCGGAGCAGGACTTGCGTCCCACCCAACCAAAGCCGGCATTGCTGCCAGGCTCGGGGTAAATATATGCGTCAAGCCCGAGGGCTCGGCCGCATAGCAGATTTGTTAATGATCCTTCCGCAGGTTCACCTACGGAAACCTTGTTACGACTTTT
>b9439d2bd7aa7c66648bd109ac974fad
AGAGCCAAGAGATCCGTTGTTGAAAGTTGTATTTTGAATTGTTTTATTCATAATATTTTTCAGACAAAGAGTTAAGATTGGGTTGATGTTTGGGGCTGATCTCTTTTTCAAGAGACCAACCCTGACATTGCACACAAGGTGGATATGGATTTAAAAAAGTGCCATAAAACACTTATTATGAATGATCCTTCCGCAGGTTCACCTACGGAAACCTTGTTACGACTTT
>2ce86756fb6958ce918cb37606192060
TAAAAGTCGTAACAAGGTTTCCGTAGGTGAACCTGCGGAAGGATCATTAACGAGTGTGTGGGTCCCCCCGGGCCCCATCTCCCATCCTTGACTACCCCACTCCGACATCGCCACGCACGCGGGTCCCCCGGGGAGGACATCGTCCCCTCGACCGGGGCCCGCGCCGCGGGTGGATGGCCGATCTCTTCTCCCTCTTCTTTGACTACAGCAGACGTCTTAAAAACGTAACCATTAATAAAACTTTCAACAACGGATCTCTTGGTTCTGG
>3ec2449d5777bea3b45c85c1e51cbcbc
CCAGAACCAAGAGATCCGTTGTTGAAAGTTTTAACTATTATATAGTACTCAGACATCATGTATTTCAAGAGTTGTGGTCCTCTGGCAGGCACTCAGCAGCCGAAGCCGCTGGCACGAGGCGTCCTGCCAAAGCAACAAAGGTAATTTATTCAAGGGTGGAGGTCTGAACCGAGCTTCTCCGAGAGGCCCGACGTCTCTAAACCCTCCGAGGAGGGTAACCCCCAGGATTGCTCCCGGGGCGCTGACTGTTCATTGCTCTATTAATGATCCTTCCGCAGGTTCACCTACGGAAACCTTGTTACGACTTTTA
>e1ffeba49d9162c9ecf0d47345d35ffc
AAAAGTCGTAACAAGGTAACCGTAGGTGAACCTGCGGTTGGATCATTAACAATTTTGGGCTTTAGAGCTCTTAATACTGGGGCCGCCTTAAAACGGCCTTGGTCAACACTTGTGAACTATAGATGCTACCGCATTCTTAACCCCTTTATAAAACCCGTCTTAATCAAATAACAAAATTTGAAACAACTTTTGACAACGGATCTCTTGGCTCTC
>0645a13b2d28729cef66ce46193973cd
CCAGAACCAAGAGATCCGTTGTTGAAAGTTTTGATTTATTTATGGTTTTACTCAGAAGTTACATATAGAAACAGAGTTTAGGGGTCCTCTGGCGGGCCGTCCCGTTTTACCGGGAGCGGGCTGATCCGCCGAGGCAACAATTGGTATGTTCACAGGGGTTTGGGAGTTGTAAACTCGGTAATGATCCCTCCGCTGGTTCACCAACGGAGACCTTGTTACGACTTTTA
>c81800e959cf0f44881bd4dd4a45c84f
CCAGAACCAAGAGATCCGTTGTTGAAAGTTTTAACTATTATATAGTACTCAGACGACATGTATAAACAGAGTTTAGGGTCCTCTGGCGAGCGCTCACCAGCGTGAGCCGGTGGCCGAAGCGGCTCGCCAAAGCAACAAAGGTATAATTAACATAGGGTTGGAGAGTCACCCTTGCGGGCGATGTTCTCTGTAATGATCCCTCCGCAGGTTCACCTACGGAGACCTTGTTACGACTTTTA
>6ba973036d7f2cd76af20f52ea59a2ea
CCAGAACCAAGAGATCCGTTGTTGAAAGTTTTATATTGCGATTACGTTTTTAGGACGTTCTCTATAGTCAAGATTTTAGAGAAAAGGTAAGCCATCCGTCCATAGGGTCGGCAGCGAGCGGAGGGGATGAGTCCAACCTCCTCCCGCTTAAGCGTCCGTCGGATCGGGGGCAGGGTAGGATAGACACGGATGGGAGATGGGGCCCGGTGGGACCCTCACTCGTTAATGATCCTTCCGCAGGTTCACCTACGGAAACCTTGTTACGACTTTTA
>6af6fb1789fc62022b71e58430891d2b
GCGAGAGCCAAGAGATCCGTTGTTGAAAGTTGTATTTTGAATTAAGTTATTCATAATATGTTTCAGACAAAATCACTAAAGTTCTGAGTAGATATAAATCCCAAAGGTGACCAACGGATTGTTACAGCCGTGACCTCCAGTGAGATGACATTGCACACAAGGTGGATATGGATTTTTGAAAGTGCCATAAAAACACTTGATTATGAATGATCCTTCCGCAGGTTCACCTACGGAAACCTTGTTACGACTTTTAC
>c92af5df5e543b0f0b496877265fb74b
GTAAAAGTCGTAACAAGGTTTCCGTAGGTGAACCTGCGGAAGGATCATTAAAAACGTCCTTCACCCTGGATGCAAGTCCGGGTGGACCAGCCGATCGGGGCTCTAAACCACGTAATGCCACGCCCTCGAAAGCCTCCCTGGAGGTGGCGTGGTACTCGTCACTTCAAACCATTGTGAATCTTCCCGTTGCTTTGGCGGCAGGCCTCCGTGCCGTCAGCCCGTCCGAGGCCCACCATAAACCATTTCTGTAAACTTCAGTCAGTATACGAATAAAGTAAATCGTTAAAACTTTCAACAACGGATCTCTTGGTTCTCGC
>b0c0c3441a8b2fd963c5c320fd43a7c2
CAGAACCAAGAGATCCGTTGTTGAAAGTTGTAATTATTAAATTTTTCAGACGCTGATTTAAAATTAAAAGGGTTATAGGTTGTCCAGCTGGCAGGCAAGCCTGCCAAGGAAACTTGGGTACTCAAAAGACAAGGAAGGAGAGAAGGGACCGAAATCCCCCTCATAACAGTGGAAATCCACCGAAATTAATGATCCTTCCGCAGGTTCACCTACGGAAACCTTGTTACGACTTTT
>d0c663628716272bf58128e8b887c891
AGAACCAAGAGATCCGTTGTTGAAAGTTGTAATTATTAAGTTTTTTCAGACGCTGATTGAAAATTAAAAAGGTTATAGTTTTGTCCAATCGGCGGGCAAGCCCGCCGAGGAAACAAGAGTGCGCAAAAGACAAGGGTTCAGACAGAGTGCCTGCCGCTCATCAGTAATTAAACTATGCGGACTTACAGCGACTCCCGACCAGTAGCAAGCTACTGAATTGTAATGATCCTTCCGCAGGTTCACCTACGGAAACCTTGTTACGACTTT
>b599036f5fb87ef5648989b2331fcff6
GAGAGCCAAGAGATCCGTTGTTGAAAGTTTTATTAGATTATAATATAACTACTTTTATTACTACTGATGTTTGATAAAAAGGTCAGATGGGCAACGAATCACCACATCTTACGGTTCACAGGTGTTATGGATGTAAAGGTGCAGATGCCTTGCCGAAGCGAAGACACCCACGTTATTCACTAATGATCCTTCCGCAGGTTCACCTACGGAAACCTTGTTACGACTTTT
>be4f60744e859202ba6b5836c557571e
AGCGTCGTAACAAGGTCTCCGTTGGTGAACCAGCGGAGGGATCATTACCGAGTTTACAACTCCCAAACCCCTGTGAACATACCTATTGTTGCTTCGGCGGGATCGCCCCGGCGCCCTCGGGCCCGGACCCAGGCGCCCGCCGGAGGACCCAAACTCTTGTCTTCATGAGTATCTTCTGAGTAATACAAGCAAATAAATTAAAACTTTCAACAACGGATCTCTTGGTTCT
>0b17dde5325f21c98fc1b60d059d5a48
AGAGCCAAGAGATCCGTTGTCAAAAGTTGTTTCAAATTTTGTTATTTGATTAAGACGGGTTTTATAAAGGGGTTAAGAATGCGGTAGCATCTATAGTTCACAAGTGTTGACCAAGGCCGTTTTAAGGCGGCCCCAGTATTAAGAGCTCTAAAGCCCAAAATTGTTAATGATCCAACCGCAGGTTCACCTACGGTTACCTTGTTACGACTTT
>fa3fa754571a79718c39c5890dfe1637
CAGAACCAAGAGATCCGTTGTTGAAAGTTTTGATTCATTTGTTTTTTGCCTTTCGGCCACTCAGAATAATACTGCTTTCGCAAAATCAAGAGTTTGTGGTCTCCGGCGGACGCGTGGTCCCGGGAGCCCCCAGGGGAGCAACCCGGCGCGAGACCGCCGAAGCAACATAAAGGTAGGTTCACATAGGGTTGGGAGTTGGATAAACTCGATAATGATCCCTCCGCTGGTTCACCAACGGAGACCTTGTTACGACTTTT
>d98b9635b4268949325b365188598c2a
AAAGTCGTAACAAGGTTTCCGTAGGTGAACCTGCGGAAGGATCATTACAGTAGTCGCCTGGGTTGCCGCAAGGCCTCCCGGGTAACCTACCACCCTTTGTTTATTACACTTTGTTGCTTTGGCAGGCCTGCCCTCGGGCTGCTGGCTCCGGCCGGCGAGCGCTTGCCAGAGGACCTAAACTCTGTTTGTCTATACTGTCTGAGTACTATATAATAGTTAAAACTTTCAACAACGGATCTCTTGGTTCT
>af7dd66eccc068b612d4c0b741f21aca
GCGAGAGCCAAGAGATCCGTTGTCAAAAGTTGTTTCAAATTTTGTTATTTGATTAAGACGGGTTTTATAAAGGGGTTAAGAATGCGGTAGCATCTATAGTTCACAAGTGTTGACCAAGGCCGTTTTAAGGCGGCCCCAGTATTAAGAGCTCTAAAGCCCAAAATTGTTAATGATCCAACCGCAGGTTCACCTACGGTTACCTTGTTACGACTTTTAC
>43c7d24c206683a67fbbd411f0cc7207
AAAAGTCGTAACAAGGTTTCCGTAGGTGAACCTGCGGAAGGATCATTAATACGTATCCACGTTTCAACCCCCTGTGCACATGTCGTACGAGCCGGCCCCGGTAAAGTCCTTTGCGGGACTGGGGATTAAAAATGGTCGTATCTGGTGAGAGAATTCACGTTCTCCTGCCTTTTTTTAACACCTTTTTCAAACAACTGTACTAATCTTGACTGCTTTCGAGCGTCAAAAATACGAAACCAAAACAACTCTTAGCAACGGATATCTTGGTTCCC
>3c557ac25d7549c4e23a48bd51d4236c
CCAGAACCAAGAGATCCGTTGTTGAAAGTTTTATTAATGGTTACGTTTTTAAGACGTCTGCTGTAGTCAAAGAAGAGGGAGAAGAGATCGGCCATCCACCCGCGGCGCGGGCCCCGGTCGAGGGGACGATGTCCTCCCCGGGGGACCCGCGTGCGTGGCGATGTCGGAGTGGGGTAGTCAAGGATGGGAGATGGGGCCCGGGGGGACCCACACACTCGTTAATGATCCTTCCGCAGGTTCACCTACGGAAACCTTGTTACGACTTTTA
>65ab7a289707dfab082d25b214e7a8f1
TAAAAGTCGTAACAAGGTCTCCGTAGGTGAACCTGCGGAGGGATCATTACAGAGAACATCGCCCGCAAGGGTGACTCTCCAACCCTATGTTAATTATACCTTTGTTGCTTTGGCGAGCCGCTTCGGCCACCGGCTCACGCTGGTGAGCGCTCGCCAGAGGACCCTAAACTCTGTTTATACATGTCGTCTGAGTACTATATAATAGTTAAAACTTTCAACAACGGATCTCTTGGTTCTGG
>b5d9c066dbf48c8331222f3c7aca0e17
GTAAAAGTCGTAACAAGGTTTCCGTAGGTGAACCTGCGGAAGGATCATTAATGAGAGAGGGGCTTCGCGCTCCCGGGGGCTCCGGCCCTCAACTCTTCACCCTCTGCCTATCTACCTTTGTTGCTTTGGCGCGCCCTGGGGTTCCACCCCCACGCCGGCCCCGGGTCCTCGACTTGGACCGGTGAGAGCCCGTCAGAGGTCCATTTCAATTCTTTACCAGTTGATGTCCGAGTATAATCTTAATAAATAAAACTTTCAACAACGGATCTCTTGGTTCTGGC
>bb54e93f73c81c945318225bed2eb5d6
AAAGTCGTAACAAGGTTTCCGTAGGTGAACCTGCGGAAGGATCATTAATGAGAACGTGCCCTTCGGGGTAGATCTCCCACCCTTTGTATACTATACCTTTGTTGCCTTGGCAGGCCCGTCTCCGGACCGCTGGCTTCGGCTGGCCCGCGCCTGTCAGAGGACTCCAAACTCTTTTGTTAATGTCGTCTGAGTACTATTTTAATAGTTAAAACTTTCAACAACGGATCTCTTGGTTCT
>ab2b4603d90299e55df12904c26a13fa
AAAAGTCGTAACAAGGTTTCCGTAGGTGAACCTGCGGAAGGATCATTGCACACACAAGTTGCAGCCAACCCGCGGCGAACGAACACATTGTCCCCCTCGGTGGGTCGTGGCGCCTCGCGGCGTCGCGGCCTGCCGTCTCCCTTCGTCACGAGGTCGTGACCTCGCGGCGTCGGGTCTCCACGATGCGTCCACCTTGACCTAATGACTGAGTCCCTTTTACTCAATGGGAGTGAGCTCCGCGCCCCGCTTGGCTTCGCTGAGTGGGCCGGCGCTGGTTACCTTGCGAGTTGAAACATAACCAAAAACAACTCTCAGCAACGGATATCTTGGCTCTT
>738b3e7dffbf10e3593dd6aa65d1882c
AAAAGTCGTAACAAGGTTTCCGTAGGTGAACCTGCGGAAGGATCATTAATTTCGGTGGATTTCCACTGTTATGAGGGGGATTTCGGTCCCTTCTCTCCTTCCTTGTCTTTTGAGTACCCAAGTTTCCTTGGCAGGCTTGCCTGCCAGCTGGACAACCTATAACCCTTTTAATTTTAAATCAGCGTCTGAAAAATTTAATAATTACAACTTTCAACAACGGATCTCTTGGTTCTG
>4ac508b509d51688a8cd13c5f23dfc2a
GCGAGAACCAAGAGATCCGTTGTCAAAAGTTGTTTAAAGATTAATTTCTTTATGGTATAAGACTGGTATGGACATGAGTTTAATAAGCAGTGGCTTGCAAGACAGGTCTCGCTTGCCACTGAATAAAAGACAGGGGTTTGCAAGGGAGCTTCCTTGAAGGGTCACTCCCAAACACCCAACTCCACCACCACGCTTTGACACGTTGCAGTAGAGAAGGGTTATCAATGAAATTCATTAATGATCCAACCGCAGGTTCACCTACGGTTACCTTGTTACGACTTTTAC
>e6fe38317da4af69a1c2486ae1d6b4eb
CGATGCCAGAACCAAGAGATCCGTTGTTGAAAGTTTTATAGTATTATAAAAGTACTCAGACGACACTGATTCAGAATAATCCTGCCCGAAGGCAAGGCAACCGGTCAAACAACAAGAAAGGGAGATTGTGTTTCCACAACTCGGTAATGATCCCTCCGCAGGTTCACCTACGGAGACCTTGTTACGACTTTTACTTCCTCTAAATGAC
>1988bbb3cca4de19b55b936b4cf0928a
GTAAAAGTCGTAACAAGGTTTCCGTAGGTGAACCTGCGGAAGGATCATTACCGTGGGGTTTCGGCCCCATTGAGATAGCACCCTTTGTTTATGAGTACCCTTGTTTCCTCGGTGGGCTTGCCCGCCATGAGGACATTAAAAACCCTTTGTAGTAGCAGTAACTTCAGTTAATAATAAATATTAAAACTTTCAACAACGGATCTCTTGGTTCTGGC
>7e94029ab811b101d5b4e1a96c6ca1b3
GCGAGAGCCAAGAGATCCGTTGTTGAAAGTTTTTTTTTATTTCGATATTTCGTTACATACTTTGACTAGTGTTTAAAATGAGCCGTAGAAAGCAAGGATTCGCATGTCATACGGATTCTACCGAAGTCCGTTATCGTGCTTGTCCAAGTCCTCCACCGATAAATGCACAGAGTTAGAAAGTGGGGGTTCAGGCCAGACCGAAGTCTACGCCCTTAAATTCACTAATGATCCTTCCGCAGGTTCACCTACGGAAACCTTGTTACGACTTTTAC
>5386aacf99d2758ab95a4759adaf5e9b
CGGGAACCAAGATATCCGTTGCTAAGAGTTGTTTTGGTTTCGTATTTTTGACGCTCGAAAGCAGTCAAGATTAGTACAGTTGTTTGAAAAAGGTGTTAAAAAAAGGCAGGAGAACGTGAATTCTCTCACCAGATACGACCATTTTTAATCCCCAGTCCCGCAAAGGACTTTACCGGGGCCGGCTCGTACGACATGTGCACAGGGGGTTGAAACGTGGATACGTATTAATGATCCTTCCGCAGGTTCACCTACGGAAACCTTGTTACGACTTTTA
>42be5681d70330ec55f4c5792da826a9
GCCAGAACCAAGAGATCCGTTGTTGAAAGTTTTATTTATTAAGATTATACTCGGACATCAACTGGTAAAGAATTGAAATGGACCTCTGACGGGCTCTCACCGGTCCAAGTCGAGGACCCGGGGCCGGCGTGGGGGTGGAACCCCAGGGCGCGCCAAAGCAACAAAGGTAGATAGGCAGAGGGTGAAGAGTTGAGGGCCGGAGCCCCCGGGAGCGCGAAGCCCCTCTCTCATTAATGATCCTTCCGCAGGTTCACCTACGGAAACCTTGTTACGACTTTTAC
>1d592cb0714c123079ddd8ed1b39b0af
GGAAGTAAAAGTCGTAACAAGGTCTCCGTAGGTGAACCTGCGGAGGGATCATTACCGAGTTGTGGAAACACAATCTCCCTTTCTTGTTGTTTGACCGGTTGCCTTGCCTTCGGGCAGGATTATTCTGAATCAGTGTCGTCTGAGTACTTTTATAATACTATAAAACTTTCAACAACGGATCTCTTGGTTCTGGCATCGATGAAGAACG
>60569653a1af8a7338c88ff9e558819a
GAGAGCCAAGAGATCCGTTGTCAAAAGTTGTTTCAAATTTTGTTATTTGATTAAGACGGGTTTTATAAAGGGGTTAAGAATGCGGTAGCATCTATAGTTCACAAGTGTTGACCAAGGCCGTTTTAAGGCGGCCCCAGTATTAAGAGCTCTAAAGCCCAAAATTGTTAATGATCCAACCGCAGGTTCACCTACGGTTACCTTGTTACGACTTTT
>ec79c2679b216e9285162214efdd4f20
GCGAGAACCAAGAGATCCGTTGTTGAAAGTTTTAACGATTTACTTTATTCGTATACTGACTGAAGTTTACAGAAATGGTTTATGGTGGGCCTCGGACGGGCTGACGGCACGGAGGCCTGCCGCCAAAGCAACGGGAAGATTCACAATGGTTTGAAGTGACGAGTACCACGCCACCTCCAGGGAGGCTTTCGAGGGCGTGGCATTACGTGGTTTAGAGCCCCGATCGGCTGGTCCACCCGGACTTGCATCCAGGGTGAAGGACGTTTTTAATGATCCTTCCGCAGGTTCACCTACGGAAACCTTGTTACGACTTTTAC
>c11c855406bc7664b5645fd9007b492d
TAAAAGTCGTAACAAGGTTTCCGTAGGTGAACCTGCGGAAGGATCATTACAAAATTTCGAGTGCTGAGCAGCGGCTCGCCAGGTGCTAGCAATGGCGCTGGGCGAGTTTGCTGCCGACACCACTTTACGCTTGTTGTGTTTGACAGAGTTATTGTAGCTTTAAAAATAGACAACTTTTAACAATGGATCTCTTGGCTCTTGCAT
>8dbca1b68de0d62888244fc841bda9dd
AAGAGCCAAGATATCCGTTGCTGAGAGTTGTTTTTGGTTATGTTTCAACTCGCAAGGTAACCAGCGCCGGCCCACTCAGCGAAGCCAAGCGGGGCGCGGAGCTCACTCCCATTGAGTAAAAGGGACTCAGTCATTAGGTCAAGGTGGACGCATCGTGGAGACCCGACGCCGCGAGGTCACGACCTCGTGACGAAGGGAGACGGCAGGCCGCGACGCCGCGAGGCGCCACGACCCACCGAGGGGGACAATGTGTTCGTTCGCCGCGGGTTGGCTGCAACTTGTGTGTGCAATGATCCTTCCGCAGGTTCACCTACGGAAACCTTGTTACGACTTTT
>f1c8eede6966e63b87177f135edd6eec
AAAAGTCGTAACAAGGTTTCCGTAGGTGAACCTGCGGAAGGATCATTAGTGAATAACGTGGGTGTCTTCGCTTCGGCAAGGCATCTGCACCTTTACATCCATAACACCTGTGAACCGTAAGATGTGGTGATTCGTTGCCCATCTGACCTTTTTATCAAACATCAGTAGTAATAAAAGTAGTTATATTATAATCTAATAAAACTTTCAACAACGGATCTCTTGGCTCTC
>7d614a48f8da9325ad74be970f8e72d2
TAAAAGTCGTAACAAGGTTTCCGTAGGTGAACCTGCGGAAGGATCATTAGTGAATTATAGGGCGTCTACTTGTAGAGCCTGACCTCCACTCTCTAACACTGTGCACTTTTTGGCGGGTTAAGGAAAGATTAGTAATAGTCCGCCCTAGACCTGCGGCTCATTTTATAACACTAGTCAAAGAATGTAACGAAATATCGAAACAAAAAAAAACTTTCAACAACGGATCTCTTGGCTCTCG
>87292aaed45b287543044fe843a89942
CAAGAGCCAAGAGATCCATTGTTAAAAGTTGTCATTTTAGTTTTACAACTGTAACTCTGTCAAACATACAAGCGTCTATGTGGCTGGCAAGGACTTGCGCCCTCACACAGCCGGAGCAGGACTTGCATCCCACCCAACCAAAGCCGGCATTGCTGCCAGGCTCGGGGTAAATATATGCGTCAAGCCCGAGAGCTCGGCCGCATAGCAGATTTGTTAATGATCCTTCCGCAGGTTCACCTACGGAAACCTTGTTACGACTTTTA
>5f62e55d809334067e999e1bd132ec80
CGAGAGCCAAGAGATCCGTTGTTGAAAGTTTTTTTTTGTTTTTTATTTCATGACATACTTTGACTAATGTTTAAAATGAAGCCGCAAGGTAGTTTCACTCGAAAGTTCCATTACCTCGCCATCAAGTGCACAGTGTTAGAAGTGGAGGTCAGGCTCTACAAGTAGACGCCCTATAATTCACTAATGATCCTTCCGCAGGTTCACCTACGGAAACCTTGTTACGACTTTTA
>0d23ae166a896a18885ac7d09d04e052
AAAGTCGTAACAAGGTTTCCGTAGGTGAACCTGCGGAAGGATCATTACCGAGTTCATGCCCTCACGGGTAGATCTCCCACCCTTTGTATACCTTACCTTTGTTGCTTTGGCGGGCCGCCTAGCTACTGGCTTCGGCTGGTAAGTGCCCGCCGGAGAACCCCAAACCCAAACCATTTATAGTGTCGTCTGAGTAAAATTTTAATATTTAAAACTTTCAACAACGGATCTCTTGGCTCT
>b76c86a2b312c67a525c857de0bdc95d
CGAGAGCCAAGAGATCCGTTGTTGAAAGTTTTTTTTTGTTTCGATATTTCGTTACATTCTTTGACTAGTGTTATAAAATGAGCCGCAGGTCTAGGGCGGACTATTACTAATCTTTCCTTAACCCGCCAAAAAGTGCACAGTGTTAGAGAGTGGAGGTCAGGCTCTACAAGTAGACGCCCTATAATTCACTAATGATCCTTCCGCAGGTTCACCTACGGAAACCTTGTTACGACTTTTA
>f048c25547f82b834790d15ad15f94ad
TAAAAGTCGTAACAAGGTTTCCGTAGGTGAACCTGCGGAAGGATCATTACAGTAGTCACCCGGGACGCCGCAAGGCCTCCCGGGTAACCTACCACCCTTTGTTTATTACACTTTGTTGCTTTGGCAAGCCTGCCCTCGGGCTGCTGGCTCCGGCCGGCGAGCGCTTGCCAGAGGACCTAAACTCTGTTTGTCTATACTGTCTGAGTACTATATAATAGTTAAAACTTTCAACAACGGATCTCTTGGTTCTGG
>c97c62037549c998018e322571a3adec
AGAACCAAGAGATCCGTTGTTGAAAGTTTTAACTATTATATAGTACTCAGACAGTATAGACAAACAGAGTTTAGGTCCTCTGGCAAGCGCTCGCCGGCCGGAGCCAGCAGCCCGAGGGCAGGCCTGCCAAAGCAACAAAGTGTAATAAACAAAGGGTGGTAGGTTACCCGGGAGGCCTTGCGGCAACCCAGGCGACTACTGTAATGATCCTTCCGCAGGTTCACCTACGGAAACCTTGTTACGACTTT
>0ca60b626c1d632066c9c82b8acd9835
GCCAGAACCAAGAGATCCGTTGTTGAAAGTTTTAACTATTATATAGTACTCAGACAATATTAACAAACAGAGTTTTAGGTCCTCTGGCAGACACTGACCAGCCGGAGCCGGTGGGCCGAAGCCGGGTCTGCCAAAGCAACAAAGGTATAAATAAACAAAGGGTGGGAGGTATACCCCGAAGGGCAACGTCTCTTTAATGATCCTTCCGCAGGTTCACCTACGGAAACCTTGTTACGACTTTTAC
>26d90d36e1731e6b41162cec0a9060ae
AGAGCCAAGAGATCCGTTGTTGAAAGTTTTAAATATTAAAATTTTACTCAGACGACACTATAAATGGTTTGGGTTTGGGGTTCTCCGGCGGGCACTTACCAGCCGAAGCCAGTAGCTAGGCGGCCCGCCAAAGCAACAAAGGTAAGGTATACAAAGGGTGGGAGATCTACCCGTGAGGGCATGAACTCGGTAATGATCCTTCCGCAGGTTCACCTACGGAAACCTTGTTACGACTTT
>50c85cac498607dd3c0bdacdf48f708e
AGAGCCAAGAGATCCGTTGTTGAAAGTTTTTTTTTGTTTTTTATTTCATTACATACTTTGACTAATGTTTAAAATGAAGCCGCAAGGTAGTTTCACTCGAAAGTTCCATTACCTCGCCATCAAGTGCACAGTGTTAGAAGTGGAGGTCAGGCTCTACAAGTAGACGCCCTATAATTCACTAATGATCCTTCCGCAGGTTCACCTACGGAAACCTTGTTACGACTTT
>4e8ac087843b67edb1271a39a7d54b16
CCAGAACCAAGAGATCCGTTGTTGAAAGTTTTAACTATTATATAGTACTCAGACAGTATAGACAAACAGAGTTTAGGTCCTCTGGCAAGCGCTCGCCGGCCGGAGCCAGCAGCCCGAGGGCAGGCCTGCCAAAGCAACAAAGTGTAATAAACAAAGGGTGGTAGGTTACCCGGGAGGCCTTGCGGCAACCCAGGCGACTACTGTAATGATCCTTCCGCAGGTTCACCTACGGAAACCTTGTTACGACTTTTA
>98d642236db97f6f6520b535805449c4
AAAGTCGTAACAAGGTTTCTGTAGGTGAACCTGCAGAAGGATCATTAGTGAAGATTTGGGCAGGCCATACGGACGCCAAAAAGTGTCCCTGGCCGCCTACACCCACTATACATCCACAAACCCGTGTGCACTGTCTTGGAGAAAGGCTTCAGAGAAGTTTTTTGTGGCCTCTCTTGGGGTCTTTCTTCGCTACAAACTCGAATGGTTAGTATGAACGTGGAACTTGGTTGGACCGTCACTGGCCAACAAACTATACACAACTTTCGACAACGGATCTCTTGGTTCT
>0c38214b34a1b155556375b8b2534bef
GCGAGAACCAAGAGATCCGTTGTTGAAAGTTTTGAAGATTTTTTGAATTTAATCAACAAATTGACAATTAAATAAATAACAATTCAATATAAATATTGAAGTTTAGTTCAGTAAACCTCTGGCCCAAACTATTTCTAGTCCAGACCAAAGCAAAAGTTCTTGTAATAACAAAAAACACTGTGTGTAAGGTTTTTTCGCCGCGCAATTAAGCGCTGGCAAAAAGAATACTGTAATGATCCTTCCGCAGGTTCACCTACGGAAACCTTGTTACGACTTTTAC
>c56ae77fbed0f8c590b5bd816370f836
AAAAGTCGTAACAAGGTTTCCGTAGGTGAACCTGCGGAAGGATCATTAAAGAGACGTTGCCCTTCGGGGTATACCTCCCACCCTTTGTTTATTATACCTTTGTTGCTTTGGCGGGCCCGTCCTCGGACCACCGGCTTCGGCTGGTCAGCGCCCGCCAGAGGACCTAAAACTCTGTTTGTTCATATTGTCTGAGTACTATATAATAGTTAAAACTTTCAACAACGGATCTCTTGGTTCTG
>a6fffcc981769e85cca1d551cfcf8c6c
CAAGAGCCAAGAGATCCATTGTTAAAAGTTGTCTATTTTTAAAGCTACAATAACTCTGTCAAACACAACAAGCGTAAAGTGGTGTCGGCAGCAAACTCGCCCAGCGCCATTGCTAGCACCTGGCGAGCCGCTGCTCAGCACTCGAAATTTTGTAATGATCCTTCCGCAGGTTCACCTACGGAAACCTTGTTACGACTTTTACTT
>c67fd86ff0b94ed06818b2d7c7a8ebaf
GTAAAAGTCGTAACAAGGTCTCCGTTGGTGAACCAGCGGAGGGATCATTATCGAGTTTATCCAACTCCCAACCCTATGTGAACCTACCTTTATGTTGCTTCGGCGGTCTCGCGCCGGGTTGCTCCCCTGGGGGCTCCCGGGACCACGCGTCCGCCGGAGACCACAAACTCTTGATTTTGCGAAAGCAGTATTATTCTGAGTGGCCGAAAGGCAAAAAACAAATGAATCAAAACTTTCAACAACGGATCTCTTGGTTCTGGC
>8db30ba0a9bc81710e17af52b116f867
CAGAACCAAGAGATCCGTTGTTGAAAGTTTTGATTCATTTGTATACTGCCTTGCGGCACACTCAGAAGAAACTGTAAAAACAGAAGAGTTTGTGGCCTCCGGCGGGCGCCTTGGTTCCGGGCCGCGGGACCGCAGGGGGTTCCGGGCGCCGGGGCGGCTCCGCCGAAGCAACATAGAGGTAATGTTCACATGGGTTTGGGAGTTGTAAACTCGGTAATGATCCCTCCGCTGGTTCACCAACGGAGACCTTGTTACGACTTTT
>5962b90665a847ccf306d2b7092a2f09
TAAAAGTCGTAACAAGGTTTCCGTAGGTGAACCTGCGGAAGGATCATTACAGTAGTCGCCTGGGTTGCCGCAAGGCCTCCCGGGTAACCTACCACCCTTTGTTTATTACACTTTGTTGCTTTGGCAGGCCTGCCCTCGGGCTGCTGGCTCCGGCCGGCGAGCGCTTGCCAGAGGACCTAAACTCTGTTTGTCTATACTGTCTGAGTACTATATAATAGTTAAAACTTTCAACAACGGATCTCTTGGTTCTGG
>ae1289a566e6f61da7876e71ef5a42d9
AAAAGTCGTAACAAGGTTTCCGTAGGTGAACCTGCGGAAGGATCATTAACAAATCATCATAGTCGTGCGCTTCGGCGCACCGCTATATACACCCCAAGCCTGGGAAGAGCAGCAATGCTTGGAACGGCTTTGGTTGCAGCCTTCGGGCTGTAGGCTAGGGAGCCGCAAGGCAAACTAGCCACATAGACGCTTGCTTAGTTTGACAGAGTTTAGTTGACATTTAAAAAATACAACTTTTAACAATGGATCTCTTGGCTCTT
>d7bbc26505b3ccc8d0f81627738888bc
GCCAGAACCAAGAGATCCGTTGTTGAAAGTTTTAATATTTATTATTAACTGAAGTTACTGCTACTACAAAGGGTTTTTAATGTCCTCATGGCGGGCAAGCCCACCGAGGAAACAAGGGTACTCATAAACAAAGGGTGCTATCTCAATGGGGCCGAAACCCCACGGTAATGATCCTTCCGCAGGTTCACCTACGGAAACCTTGTTACGACTTTTAC
>7ad5bf258a061f8cfe1aaeba6053839d
AAAGTCGTAACAAGGTAACCGTAGGTGAACCTGCGGTTGGATCATTAACAATTTTGGGCTTTAGAGCTCTTAATACTGGGGCCGCCTTAAAACGGCCTTGGTCAACACTTGTGAACTATAGATGCTACCGCATTCTTAACCCCTTTATAAAACCCGTCTTAATCAAATAACAAAATTTGAAACAACTTTTGACAACGGATCTCTTGGCTCT
>96ef2ba9dbdc89b434761e567a421e5f
GAGAGCCAAGAGATCCGTTGTCAAAAGTTGTTTAAAGTTATTAACTTTTTATAATGGTCTTAGGCTAGAATGGATAACAAAGAAGGAGTTTAATCATAGTCTTCTGGCAGGCTATGAGAGCCAATTAATAAAAATTGGTCCCTAGTCCCTACCAGAGACTAAATACAAAAACAAGTTCACATTGGGGTAAATGGATGGCCAACCTGCCGAAACAGGAAGACCTTCCAAGAGTTGAATTCAATAATGATCCAACCGCAGGTTCACCTACGGTTACCTTGTTACGACTTTT
>fbc02f033d936605b02cb6fb5be494a1
AAAAGTCGTAACAAGGTTTCCGTAGGTGAACCTGCGGAAGGATCATTAACAAATCATGTTGCTACCAGAGCTGGTCCCCTTTGGGGATCGTTCTGGTATGCATATATAAACCCGAACCCGTGCGGTAAAATGCCGGGCAAGGTGTTATCGGCCTGGTGCGAGCCATGGCTGGTAGCGGAGAGGCGCAAGCCGATCCACATAGACGCTTGTATATGTTTGACAGAGTATGATACACTTATTAAAATGACAACTTTTAACAATGGATCTCTTGGCTCTT
>a5ac92787b21087b021e3fe31f5c8d52
ATCGATGCCAGAACCAAGAGATCCGTTGTTGAAAGTTTTATAGTATTATAAAAGTACTCAGACGACACTGATTCAGAATAATCCTGCCCGAAGGCAAGGCAACCGGTCAAACAACAAGAAAGGGAGATTGTGTTTCCACAACTCGGTAATGATCCCTCCGCAGGTTCACCTACGGAGACCTTGTTACGACTCGTACTTCCTCTAAATGACCA
>3ed0528f51b5b79975af28b5b5fe3d2e
GCCGGAACCAAGAGATCCGTTGTTGAAAGTTTTAAATAATTTATATTTTCACTCAGACTTCAATCTTCAGACAGAGTTCGAGGGTGTCTTCGGCGGGCGCGGGCCCGGGGGCGTGAGCCCCCCGGCGGCCAGTTAAGGCGGGCCCGCCGAAGCAACAAGGTAAAATAAACACGGGTGGGAGGTTGGACCCAGAGGGCCCTCACTCGGTAATGATCCTTCCGCAGGTTCACCTACGGAAACCTTGTTACGACTTTTAC
>2e816d09a9a11c6355c1ede52834f561
AAAGTCGTAACAAGGTTTCCGTAGGTGAACCTGCGGAAGGATCATTACAGTAGTCGCCCGGGACGCCGCAAGGCCTCCCGGGTAACCTACCACCCTTTGTTTATTACACTTTGTTGCTTTGGCAGGCCTGCCCTCGGGCTGCTGGCTCCGGCCGGCGAGCGCCTGCCAGAGGACCTAAACTCTGTTTGTCTATACTGTCTGAGTACTATATAATAGTTAAAACTTTCAACAACGGATCTCTTGGTTCT
>2f09caec2f9f0337e85ef07df938d546
AAAGTCGTAACAAGGTTTCCGTAGGTGAACCTGCGGAAGGATCATTACAATTCAGTAGCTTGCTACTGGTCGGGAGTCGCTGTAAGTCCGCATAGTTTAATTACTGATGAGCGGCAGGCACTCTGTCTGAACCCTTGTCTTTTGCGCACTCTTGTTTCCTCGGCGGGCTTGCCCGCCGATTGGACAAAACTATAACCTTTTTAATTTTCAATCAGCGTCTGAAAAAACTTAATAATTACAACTTTCAACAACGGATCTCTTGGTTCT
>33ee4cd27aafb57613ff01014656d288
GTAAAAGTCGTAACAAGGTTTCCGTAGGTGAACCTGCGGAAGGATCATTACAGTATTCTTTTTGCCAGCGCTTAATTGCGCGGCGAAAAAACCTTACACACAGTGTTTTTTGTTATTACAAGAACTTTTGCTTTGGTCTGGACTAGAAATAGTTTGGGCCAGAGGTTTACTGAACTAAACTTCAATATTTATATTGAATTGTTATTTATTTAATTGTCAATTTGTTGATTAAATTCAAAAAATCTTCAAAACTTTCAACAACGGATCTCTTGGTTCTCGC
>e5544a8b3fadeebf942217acde2b3710
AAAGTCGTAACAAGGTTTCCGTAGGTGAACCTGCGGAAGGATCATTACCTTTTTCTGCCACCCAGTGGCGGTCGGCGGGCTATAGTTCGCTATGGCCCGTGTCTGAATCCGTGTCTTTTGCGTACTACATGTTTCCTCGGCGGGCCTTTCCGCCGGCTGGACCCCTTATAACCCTCTGCAATTGCAATCAGCGTCTGAACAATTATAAATAAATTACAACTTTCAACAACGGATCTCTTGGTTCT
>85d999d490f44d62e93bc055173daae7
CCAGAACCAAGAGATCCGTTGTTGAAAGTTTTAACTATTATATAGTACTCAGACAGTATAGACAAACAGAGTTTAGGTCCTCTGGCAAGCGCTCGCCGGCCGGAGCCAGCAGCCCGAGGGCAGGCTTGCCAAAGCAACAAAGTGTAATAAACAAAGGGTGGTAGGTTACCCGGGAGGCCTTGCGGCGTCCCGGGTGACTACTGTAATGATCCTTCCGCAGGTTCACCTACGGAAACCTTGTTACGACTTTTA
>25b7c3eb5bd55d9b46802beb40ebd982
CAGAACCAAGAGATCCGTTGTTGAAAGTTTTAACTATTATATAGTACTCAGACAATATGAACAAACAGAGTTTTAGGTCCTCTGGCGGGCGCTGACCAGCCGAAGCCGGTGGTCCGAGGACGGGCCCGCCAAAGCAACAAAGGTATAATAAACAAAGGGTGGGAGGTATACCCCGAAGGGCAACGTCTCTTTAATGATCCTTCCGCAGGTTCACCTACGGAAACCTTGTTACGACTTTT
>82e33c3904fdad25fcd80dafe83b0ca4
ACAAGTCGTAACAAGGTTTCCGTAGGTGAACCTGCGGAAGGATCATTACAAATCCATCCACGTCTCAACACGCTTGAGACCACGTTGAAATGTTCCCTAGTCAGACGTGCCCCTTCGGGTGCGCGCCTGGCTAGGCTGTTAAACTAGTGTTTCCTTGTTGCTCAAATGTATCCTGTCTGCATCCTAACGGAGGCTAAGACTTGAAAACTTGTACAACTTATAACAATGGATCTCTAGGCTCTT
>62efe6b2abb3b812921450feeb54651d
AGAACCAAGAGATCCGTTGTCGAAAGTTGTGTATAGTTTGTTGGCCAGTGACGGTCCAACCAAGTTCCACGTTCATACTAACCATTCGAGTTTGTAGCGAAGAAAGACCCCAAGAGAGGCCACAAAAAACTTCTCTGAAGCCTTTCTCCAAGACAGTGCACACGGGTTTGTGGATGTATAGTGGGTGTAGGCGGCCAGGGACACTTTTTGGCGTCCGTATGGCCTGCCCAAATCTTCACTAATGATCCTTCTGCAGGTTCACCTACAGAAACCTTGTTACGACTTT
>c63772c3513fde00740c368dc8b19b3b
ACAAGTCGTAACAAGGTTTCCGTAGGTGAACCTGCGGAAGGATCATTAACGTGCATCTAAAATCTTACCGACTGTGAATCTAAACCAACCATATGTTTTTTTTTCTATCTTCGGATAGAAAATACACCACATAAACCTTAAACCAATTCATTCTGAAACCTAGTTCCTAGCTTTACTGCTAAAGAACTAACTAAAATCGACGACTTTTAACGATGGATCTCTAGGCTCGT
>197fc1e12b706f00476881238bbb06e2
TAAAAGTCGTAACAAGGTCTCCGTAGGTGAACCTGCGGAGGGATCATTACAAGTGACCCCGGTCTTACCACCGGGATGTTCATAACCCTTTGTTGTCCGACTCTGTTGCCTCCGGGGCGACCCTGCCTTCGGGCGGGGGCTCCGGGTGGACACTTCAAACTCTTGCGTAACTTTGCAGTCTGAGTAAACTTAATTAATAAATTAAAACTTTTAACAACGGATCTCTTGGTTCTGG
>108ae388654e4ef728aab7fe4d9a5edb
AAAGTCGTAACAAGGTTTCCGTAGGTGAACCTGCGGAAGGATCATTAACAAATCTGCTATGCGGCCGAGCCCTCGGGCTTGACGCATATATTTACCCCGAGCCTGGCAGCAATGCCGGCTTTGGTTGGGTGGGACGCAAGTCCTGCTCCGGTTGTGTGAGGGCGCAAGTCCTTGCCAGCCACATAGACGCTTGTATGTTTGACAGAGTTACAGTTGTAAAACTAAAATGACAACTTTTAACAATGGATCTCTTGGCTCT
>bd245b934be15fff6fee8b3c0caeab70
AAAAGTCGTAACAAGGTTTCCGTAGGTGAACCTGCGGAAGGATCATTAATGAAACTTCAAAAGTCGGCTCGTCGTTCTGTGCTGGTGGGAGAGATCCCATATGTGCACGTCGACGGGTCGCAAATCCACACACCTGTGCATCTATGACTCTGAGTATCGCCGGCCTCGCCTTGGTGCTCGAGTAACTTTTACACACTCTGCATGTAATGGAATGTCTATTGTGCATAATGTACAACTAAAACAACTTTCAACAACGGATCTCTTGGCTCTC
>0ed3191ff114528a506e275a428cddb2
CGAGAGCCAAGAGATCCGTTGTTGAAAGTTTTTTTTTGTTTTAATATTTCATTACATACTTTGACTAATGTTTAAAATGAAGCCGCAAGGTAATTTCACTCGAAAGTTCCATTACCTCGCCATCAAGTGCACAGTGTTAGAAGTGGAGGTCAGGCTCTACAAGTAGACGCCCTATAATTCACTAATGATCCTTCCGCAGGTTCACCTACGGAAACCTTGTTACGACTTTTA
>b0d59acc2e9f03df1f6c39a285ec5d43
TAAAAGTCGTAACAAGGTTTCCGTAGGTGAACCTGCGGAAGGATCATTATTGAATTATAAGGCTCGGATTGTGCTGGCCTCTCGGGGCATGTGCACGTCTCTGCCCGTTAATCCCAACCCACCCCTGTGAACCGACCGTGTGAGGCAGCTCTGTAACGGAGCCGTCCCATGCTTTATCATAAACCCTGTATGTCATCAGAATGTAAATCTATATCCTCGCCTTAAAACCGCGTCGGTAAAAAAAATTAATACAACTTTCAACAACGGATCTCTTGGCTCTGG
>ec6d75bbbaabbcf9426dccd1e262815a
CCAGAACCAAGAGATCCGTTGTTGAAAGTTTTAACTATTTTATAGTACTCAGACGACATTTAATACAGAGTTGTGGTCCTCTGGCGGGCACGATCCAGCCGAAGCCGGTGCTTGCGCGGCCCACCAAAGCAACAAATTGAGATAATCAAGGGTTAGAAGGACCGGTTTCCCGGCTTCATTTTTAATGATCCTTCCGCAGGTTCACCTACGGAAACCTTGTTACGACTTTTA
>8f649d1b85f9be9e4c166ada9f18d2bf
TAAAAGTCGTAACAAGGTCTCCGTAGGTGAACCTGCGGAGGGATCATTACAAGTGACCCCGGTCTAACCACCGGGATGTTCATAACCCTTTGTTGTCCGACTCTGTTGCCTCCGGGGCGACCCTGCCTTCGGGCGGGGGCTCCGGGTGGACACTTCAAACTCTTGCGTAACTTTGCAGTCTGAGTAAACTTAATTAATAAATTAAAACTTTTAACAACGGATCTCTTGGTTCTGG
>9531ce1721447b0f8a5dc85d0c97beba
AGAGCCAAGAGATCCGTTGTTGAAAGTTTTTTTTTGTTTTAAATTTCTTTACATACTTTGACTAATGTTTAAAATGAAGCCGAAAGGTTCTCTTCATGAGCTCGAAGGCTCAATCTAATTACCTTTCCATCAAGTGCACAGTGTTAGAAGTGGAGGTCAGGCTCTACAAGTAGACGCCCTATAATTCACTAATGATCCTTCCGCAGGTTCACCTACGGAAACCTTGTTACGACTTT
>e7c4908d2e78698cfdee49236aaf09a0
GTAAAAGTCGTAACAAGGTCTCCGTAGGTGAACCTGCGGAGGGATCATTACCGAGTGAGGGCCTCCGGGTCCGACCTCCAACCCTTTGTGAACACATCCCGTTGCTTCGGGGGCGACCCTGCCGGGCGCCCCCGGAGGACCACTTAAACCATGCATCTCTGCGTCGGAGTTTACGAGTAAATCGAAACAAAACTTTCAACAACGGATCTCTTGGTTCTGGC
>abc0909291fede4ec1420ebd42a9ed14
GGGAACCAAGATATCCGTTGCTAAGAGTTGTTTTGGTTTCGTATTTTTGACGCTCGAAAGCAGTCAAGATTAGTACAGTTGTTTGAAAAAGGTGTTAAAAAAAGGCAGGAGAACGTGAATTCTCTCACCAGATACGACCATTTTTAATCCCCAGTCCCGCAAAGGACTTTACCGGGGCCGGCTCGTACGACATGTGCACAGGGGGTTGAAACGTGGATACGTATTAATGATCCTTCCGCAGGTTCACCTACGGAAACCTTGTTACGACTTTT
>01d632cd1ad5a677dd24c7ca461dd166
TAAAAGTCGTAACAAGGTTTCCGTAGGTGAACCTGCGGAAGGATCATTAGTGAATTATAGGGCGTCTACTTGTAGAGCCTGACCTCCACTTCTAACACTGTGCACTTGATGGCGAGGTAATGGAACTTTCGAGTGAAATTACCTTGCGGCTTCATTTTAAACATTAGTCAAAGTATGTAATGAAATATTAAAACAAAAAAAAACTTTCAACAACGGATCTCTTGGCTCTCG
>808f1787475d31b61d75bf80eb7b7bc5
AAGAGCCTAGAGATCCATTGTTATAAGTTGTACAAGTTTTCAAGTCTTAGCCTCCGTTAGGATGCAGACAGGATACATTTGAGCAACAAGGAAACACTAGTTTAACAGCCTAGCCAGGCGCGCACCCGAAGGGGCACGTCTGACTAGGGAACATTTCAACGTGGTCTCAAGCGTGTTGAGACGTGGATGGATTTGTAATGATCCTTCCGCAGGTTCACCTACGGAAACCTTGTTACGACTTTT
>439ad554b211c25e128f1dd36f4b7d00
AAAAGTCGTAACAAGGTTTCCGTAGGTGAACCTGCGGAAGGATCATTAGTGAATTTAAGGGCGTAGACTTCGGTCTGGCCTGAACCCCCACTTTCTAACTCTGTGCATTTTATCGGTGGAGGACTTGGACAAGAGGTAATAACGGACTTCGGTTGAATCCGTATGACCCTCGAATCCTATGTCTTCTACGGCTCATTTTATAACACTAGTCAAAGTATGTAACGAAATATCGAAATAAAAAAAAACTTTCAACAACGGATCTCTTGGCTCTC
>600c13b7c9123deeef6d5aef95758934
GTAAAAGTCGTAACAAGGTTTCCGTAGGTGAACCTGCGGAAGGATCATTATCGAGTACGGGTCCCTTGGGCCCCATCTCCAACCCCTGCCTATACTACCACGTTGCTTTGACGGGCCCGTCCTTGACTGGACCGCCGGGGGTTTGTCCTCTGGTCCGTGCCCGTCAGTAGGCCCCACAAAATCGTTGAGCAGTGATGTCTAAATATCAAACAAATAACTAAAACTTTCAACAACGGATCTCTTGGTTCTGGC
>17c8b1354fea33c8639ee7e6972ffa40
AGAACCAAGAGATCCGTTGTTGAAAGTTTTAACTATTATATAGTACTCAGACAGTATAGACAAACAGAGTTTAGGTCCTCTGGCAGGCGCTCGCCGGCCGGAGCCAGCAGCCCGAGGGCAGGCCTGCCAAAGCAACAAAGTGTAATAAACAAAGGGTGGTAGGTTACCCGGGAGGCCTTGCGGCGTCCCGGGCGACTACTGTAATGATCCTTCCGCAGGTTCACCTACGGAAACCTTGTTACGACTTT
>b61e89cb28d6485e737328f123fab5eb
TAAAAGTCGTAACAAGGTTTCCGTAGGTGAACCTGCGGAAGGATCATTGTCGTGACCCTGACCAAAATAGACCGCGCACGCGTAATCCAACCTGCCGGCGGCGGCATCGTCCGTTGCTCGGCCAAGTCCTTGACAACCTCCTCTTCTCGGAGTGGGGGCTCGAGGTAAAAGAACCCACGGCGCCTAAGGCGTCAAGGAACACTGTGCCTAACTCGGGGACGCGGCCGGCTTGCTGGCCGCCCCTCGTGTTGCAATGCTATTTAATCCACACGACTCTCGGCAACGGATATCTCGGCTCTCG
>4e1c988f444cf17623e69e6ea861f3fb
GCCAGAACCAAGAGATCCGTTGTTGAAAGTTTTAACGATTATATGGGACTTAGACGGCACAGAAAACAGGAGTTGGGGCCTCTGGTCGGCGCGTACCAGCAGAGAGCCGGTAGCGGGCGGGCCCGCGGCCGACCAAAGCAACAAAGGTATCGTTCACACGGGTGGGAGGTCTACCCCGAAGGGCACGAACTCTGTAATGATCCCTCCGCAGGTTCACCTACGGAGACCTTGTTACGACTTTTAC
>5bd6424017216283e10071485ba47e03
AAAGTCGTAACAAGGTTTCCGTAGGTGAACCTGCGGAAGGATCATTACAGAGTTCATGCCCTTCGGGGTAGACCTCCCACCCTTTGTATACATTGCCTTTGTTGCTTTGGCGGGCCGCCTTTCGGCCACCGGCCCCAGCTGGTGCGCGCCCGCCAGAGAACCCCAAACCCTGTCTTACAGTGTCGTCCGAGTACTATATAATAGTTAAAACTTTCAACAACGGATCTCTTGGTTCT
>0b3b1583da7499353581a7dac20e5d8e
GCCAGAACCAAGAGATCCGTTGTTGAAAGTTTTGATTCATTTGTTTTTTGCCTTTCGGCCACTCAGAATAATACTGCTTTCGCAAAATCAAGAGTTTGTGGTCTCCGGCGGACGCGTGGTCCCGGGAGCCCCCAGGGGAGCAACCCGGCGCGAGACCGCCGAAGCAACATAAAGGTAGGTTCACATAGGGTTGGGAGTTGGATAAACTCGATAATGATCCCTCCGCTGGTTCACCAACGGAGACCTTGTTACGACTTTTAC
>09abf222cd93a0cd9c7a06d056ac180c
CCAGAGCCAAGAGATCCGTTGTTGAAAGTTGTATTAATTTTTTTTACCGACGCGGTTTTAAGGCGAGGATATAGATTTACATTCTGATGACATACAGGGTTTATGATAAAGCATGGGACGGCTCCGTTACAGAGCTGCCTCACACGGTCGGTTCACAGGGGTGGGTTGGGATTAACGGGCAGAGACGTGCACATGCCCCGAGAGGCCAGCACAATCCGAGCCTTATAATTCAATAATGATCCTTCCGCAGGTTCACCTACGGAAACCTTGTTACGACTTTTA
>8e0b0f708aa373b5eb3a548a030b4306
AAAAGTCGTAACAAGGTTTCCGTAGGTGAACCTGCGGAAGGATCATTAAAAATCCTTCACCCTGGATCCAGTATCTGGGTGGACCAGCCTCCGGGGCTCTAATCCGTACGTAATGCCACCCGCGGAGCCCCTTTATGGGGATGCGGTGTGGTACTCGTTACTTCAAACCATTGTGAACCTTCCCGTTGCTTCGGCGGCATGCCTCGTGCTGTCAGCCCGCCTGAGGCCCACCATGAAACCATTTCTGTAAACTTCTGTCAGTATACGAAAAGTAAATCGTTAAAACTTTCAACAACGGATCTCTTGGTTCTC
>acc615f0517f2315b333224ec593560c
CCAGAACCAAGAGATCCGTTGTTAAAAGTTTTAATTTATTAATTAAGTTTACTCAGACTGCAAAGTTACGCAAGAGTTTGAAGTGTCCACCCGGAGCCCCCGCCCGAAGGCAGGGTCGCCCCGGAGGCAACAGAGTCGGACAACAAAGGGTTATGAACATCCCGGTGGTAAGACCGGGGTCACTTGTAATGATCCCTCCGCAGGTTCACCTACGGAGACCTTGTTACGACTTTTA
>eaf187b8bbde85c56edec0f7cfa711a9
GAGAGCCAAGAGATCCGTTGTTGAAAGTTTTTTTTTATTTCGATATTTCGTTACATACTTTGACTAGTGTTATAAAATGAGCCGTAGAAGACATAGGATTCGAGGGTCATACGGATTCAACCGAAGTCCGTTATTACCTCTTGTCCAAGTCCTCCACCGATAAAATGCACAGAGTTAGAAAGTGGGGGTTCAGGCCAGACCGAAGTCTACGCCCTTAAATTCACTAATGATCCTTCCGCAGGTTCACCTACGGAAACCTTGTTACGACTTTT
>abd8e1d0b92b89a7beb3c8d1f12afde9
AAGAGCCAAGAGATCCATTGTTAAAAGTTGTATTTTTTAAATGTCAACTAAACTCTGTCAAACTAAGCAAGCGTCTATGTGGCTAGTTTGCCTTGCGGCTCCCTAGCCTACAGCCCGAAGGCTGCAACCAAAGCCGTTCCAAGCATTGCTGCTCTTCCCAGGCTTGGGGTGTATATAGCGGTGCGCCGAAGCGCACGACTATGATGATTTGTTAATGATCCTTCCGCAGGTTCACCTACGGAAACCTTGTTACGACTTTT
>9a902850ce7aac9eb473ccb4876618a5
GAGAACCAAGAGATCCGTTGTTGAAAGTTTTAACGATTTACTTTTCGTATACTGACAGAAGTTTACAGAAATGGTTTCATGGTGGGCCTCAGGCGGGCTGACAGCACGAGGCATGCCGCCGAAGCAACGGGAAGGTTCACAATGGTTTGAAGTAACGAGTACCACACCGCATCCCCATAAAGGGGCTCCGCGGGTGGCATTACGTACGGATTAGAGCCCCGGAGGCTGGTCCACCCAGATACTGGATCCAGGGTGAAGGATTTTTAATGATCCTTCCGCAGGTTCACCTACGGAAACCTTGTTACGACTTTT
>699d2accd1f5b508476601edadeff90e
AAAAGTCGTAACAAGGTAACCGTAGGTGAACCTGCGGTTGGATCATTAAAAAATGAATAGTGTTTCAGGAATCCTTCAAGCCTTGGTTTGTCAAGGACTGAAACATTAACCAACCCTTTGTGCAATCATATAGTATTTTGGGCAAGTCTCTATGATTTGCCCAGCATTTTCAAAAAACCCCTTTAAATTGATCTTAAATTTTTTAAATATAAAAAAAAACAACTTTTGACAACGGATCTCTTGGCTCTC
>24c363724954c9edc1c13cad7a63f8d8
AGAACCAAGAGATCCGTTGTTGAAAGTTGTAATTTATTTATAATTGTTCAGACGCTGATTGCAATTGCAGAGGGTTATAAGGGGTCCAGCCGGCGGAAAGGCCCGCCGAGGAAACATGTAGTACGCAAAAGACACGGATTCAGACACGGGCCATAGCGAACTATAGCCCGCCGACCGCCACTGGGTGGCAGAAAAAGGTAATGATCCTTCCGCAGGTTCACCTACGGAAACCTTGTTACGACTTT
>17b6dc070154c75d2aeafe379f8c3cf6
CGAGAGCCGAGATATCCGTTGCCGAGAGTCGTGTGGATTAAATAGCATTGCAACACGAGGGGCGGCCAGCAAGCCGGCCGCGTCCCCGAGTTAGGCACAGTGTTCCTTGACGCCTTAGGCGCCGTGGGTTCTTTTACCTCGAGCCCCCACTCCGAGAAGAGGAGGTTGTCAAGGACTTGGCCGAGCAACGGACGATGCCGCCGCCGGCAGGTTGGATTACGCGTGCGCGGTCTATTTTGGTCAGGGTCACGACAATGATCCTTCCGCAGGTTCACCTACGGAAACCTTGTTACGACTTTTA
>9df73f94e64a8dbffcf053296ea03aad
GTAAAAGTCGTAACAAGGTCTCCGTAGGTGAACCTGCGGAGGGATCATTACAGAGTTCGTGCCCTTCGGGGTAGACCTCCCACCCGTGTGAACGATACCTTTGTTGCTTTGGTCGGCCGCGGGCCCGCCCGCTACCGGCTCTCTGCTGGTACGCGCCGACCAGAGGCCCCAACTCCTGTTTTCTGTGCCGTCTAAGTCCCATATAATCGTTAAAACTTTCAACAACGGATCTCTTGGTTCTGGC
>70c069f544845cd73ef49264bc1be852
GGGAGCCAAGAAATCCGTTGCTAACAGTTGTTCTTAGTTTCGTAAATCTCTCGACCGCGGACTATAGGCGTTCGTCCAGGAAGTGAGCTACATCAGTCAAGTTTTTGTAAAAAGTGGTAAAAAATAAAGATACAAGCTCGCCCAGGCTCAGCCTCTCCACAAGTGAAGAAACCTCCTCCAAACTAACAGGGCTTCCGAAGAAGCAGTCACTGCCGAAGCAGCGTTACAGTAAAATGCACGGGGTGTAACGTTAAGTTACGTGTTAATGATCCTTCCGCAGGTTCACCTACGGAAACCTTGTTACGACTTTT
>4f32c7881b566212443637561d196b29
AAAAGTCGTAACAAGGTTTCCGTAGGTGAACCTGCGGAAGGATCATTAACACGTATCCAACGTTAAAACAACCCTGTGAACCTTCAGACGTGCTCTTCGTGAGCGTGCTTAAGTGACCTGGTACCCCCAAGCAATTAATGTCTGAAAGTGTCATTAATTGTGTAAGGGTGACGCAGTAAACGATCGCTAGAGGCTCACACAGCCGGCGACCGGGTCACCGGGCTACCGCCCCTTCATATTCACCCCAATGTGTCTGAACCGCTGGTTGGTAACGCGCCAGTACAAAAACCGAACAACTGTTAACAATGGATATCTTGGTTCTC
>3dd94f7b4abaedd16f9e0d69f665a0b0
GCCAGAACCAAGAGATCCGTTGTTGAAAGTTTTAGTTATTTGTTTGATATTTAGACATCACTGCTCAACGATTTTGTGGGGCCTACTGACGGGCACGGACCAGAGGACAAACCCCCGGCGGTCCAGTCAAGGACGGGCCCGTCAAAGCAACGTGGTAGTATAGGCAGGGGTTGGAGATGGGGCCCAAGGGACCCGTACTCGATAATGATCCTTCCGCAGGTTCACCTACGGAAACCTTGTTACGACTTTTAC
>dd798d85635ed209619b436097c966a1
GAGAGCCAAGAGATCCGTTGTTGAAAGTTGTTTTAGTTGTACATTATGCACAATAGACATTCCATTACATGCAGAGTGTGTAAAAGTTACTCGAGCACCAAGGCGAGGCCGGCGATACTCAGAGTCATAGATGCACAGGTGTGTGGATTTGCGACCCGTCGACGTGCACATATGGGATCTCTCCCACCAGCACAGAACGACGAGCCGACTTTTGAAGTTTCATTAATGATCCTTCCGCAGGTTCACCTACGGAAACCTTGTTACGACTTTT
>2f205ad926f34c691efe2848f2645a66
GTAAAAGTCGTAACAAGGTTTCCGTAGGTGAACCTGCGGAAGGATCATTAGTGAATTATAGGGCGTCTACTTGTAGAGCCTGACCTCCACTTCTAACACTGTGCACTTGATGGCGAGGTAATGGAACTTTCGAGTGAAACTACCTTGCGGCTTCATTTTAAACATTAGTCAAAGTATGTAATGAAATAAAAAACAAAAAAAAACTTTCAACAACGGATCTCTTGGCTCTCGC
>4d53566b41627cc175564f04f2717ede
GCGAGAACCAAGAGATCCGTTGTCAAAAGTTGTTTAAAGATTAATTTCTTTATGTAAGACTAGATGGAAATGAGTTTAATAACCAGCGAGTGCCAAAGAACAAGAGCTCTTTAACGGTCTCACTGGATAAAAGACAGGGGTTGCGTAAGGGAGCTTCCTTGAAGGGTCACTCCCCACACCCTCAGCCCACCCTCCGAAGAAGTTGAGCTGAGAATCAATGAAAATTCATTAATGATCCAACCGCAGGTTCACCTACGGTTACCTTGTTACGACTTTTAC
>f12f3a54146091b18a5410651c87b770
AAAAGTCGTAACAAGGTTTCCGTAGGTGAACCTGCGGAAGGATCATTAACACGTAACTTAACGTTACACCCCGTGCATTTTACTGTAACGCTGCTTCGGCAGTGACTGCTTCTTCGGAAGCCCTGTTAGTTTGGAGGAGGTTTCTTCACTTGTGGAGAGGCTGAGCCTGGGCGAGCTTGTATCTTTATTTTTTACCACTTTTTACAAAAACTTGACTGATGTAGCTCACTTCCTGGACGAACGCCTATAGTCCGCGGTCGAGAGATTTACGAAACTAAGAACAACTGTTAGCAACGGATTTCTTGGCTCCC
>d4a646650c54551e3ff12e1e0cfbccd7
CGAGAGCCAAGAGATCCGTTGTTGAAAGTTGTATTTAGAATTATGTATTCGAAATAGCTTCAGACAAAAAATTTACAATAAAAGGTTGGTATTGTGCTGTCGAGACGAACAAACGACACGACAGCAAACATTGCACACAAGGTGAGTACTTGTTTAAAAAGTGCAGTAAAACACTTATTATGAATGATCCTTCCGCAGGTTCACCTACGGAAACCTTGTTACGACTTTTA
>1e3991dccc4d02b6952471f2f0d4f7bc
AGAACCAAGAGATCCGTTGTTGAAAGTTTTAACTATTATATAGTACTCGGACGACACTGTAAGACAGGGTTTGGGGTTCTCTGGCGGGCGCGCACCAGCTGGGGCCGGTGGCCGAAAGGCGGCCCGCCAAAGCAACAAAGGCAATGTATACAAAGGGTGGGAGGTCTACCCCGAAGGGCATGAACTCTGTAATGATCCTTCCGCAGGTTCACCTACGGAAACCTTGTTACGACTTT
>a757e947b387022763c3eb33837e5556
GTAAAAGTCGTAACAAGGTCTCCGTAGGTGAACCTGCGGAGGGATCATTACAGAGTTCGTGCCCCTCGGGGTAGACCTCCCACCCGTGTGAACGATACCTTTGTTGCTTTGGTCGGCCGCGGGCCCGCCCGCTACCGGCTCTGCTGGTACGCGCCGACCAGAGGCCCCAACTCCTGTTTTCTGTGCCGTCTAAGTCCCATATAATCGTTAAAACTTTCAACAACGGATCTCTTGGTTCTGGC
>6d3531afc84ed18d6ff59b3aa724cca3
GTAAAAGTCGTAACAAGGTAACCGTAGGTGAACCTGCGGTTGGATCATTAATGAATTTTCATTGATTCTCAGCTCAACTTCTTCGGAGGGTGGGCTGAGGGTGTGGGGAGTGACCCTTCAAGGAAGCTCCCTTACGCAACCCCTGTCTTTTATCCAGTGAGACCGTTAAAGAGCTCTTGTTCTTTGGCACTCGCTGGTTATTAAACTCATTTCCATCTAGTCTTACATAAAGAAATTAATCTTTAAACAACTTTTGACAACGGATCTCTTGGTTCTCGC
>58822be9ffb6a91a0d0436c449ea20d6
TAAAAGTCATAACAAGGTTTCCGTAGGTGAACCTGCGGAAGGATCATTAATAGTGCCCTCTGATGCAAATCATTGGGTTAGATCTGCTCTCTTCGCAAGAAGAGGGTTTCCATACACACCGTGAACTGTGGCTTCGGCCATCACAAACTGTTAGTAATGAATGTAATATCATAACAAAAACAAAACTTTTAACAACGGATCTCTTGGCTCTCG
>526f55e935ff6de92729adb9a7c67eb6
GAGAACCAAGATATCCATTGTTAACAGTTGTTCGGTTTTTGTACTGGCGCGTTACCAACCAGCGGTTCAGACACATTGGGGTGAATATGAAGGGGCGGTAGCCCGGTGACCCGGTCGCCGGCTGTGTGAGCCTCTAGCGATCGTTTACTGCGTCACCCTTACACAATTAATGACACTTTCAGACATTAATTGCTTGGGGGTACCAGGTCACTTAAGCACGCTCACGAAGAGCACGTCTGAAGGTTCACAGGGTTGTTTTAACGTTGGATACGTGTTAATGATCCTTCCGCAGGTTCACCTACGGAAACCTTGTTACGACTTTT
>d1003082d974618cdb648a815c68bcae
GTAAAAGTCGTAACAAGGTTTCCGTAGGTGAACCTGCGGAAGGATCATTAAAGAGACGTTGCCCTTCGGGGTATACCTCCCACCCATTGTTTATTTACCTTTGTTGCTTTGGCAGTCCCGGCTTCGGCCCACCGGCTCCGGCTGGTCAGTGACTGTCGAAGATACCAAAACTCTGTTTGTTAATATTGTCTGAGTACTATATAATAGTTAAAACTTTCAACAACGGATCTCTTGGTTCTGGC
>cff42dcbfe5d81bf8da9cde686de0219
GCCAGAACCAAGAGATCCGTTGTTGAAAGTTTTGTTTCGATTTACTCGTAAACTCCGACGCAGAGATGCATGGTTTAAGTGGTCCTCCGGGGGCGCCCGGCAGGGTCGCCCCCGAAGCAACGGGATGTGTTCACAAAGGGTTGGAGGTCGGACCCGGAGGCCCTCACTCGGTAATGATCCCTCCGCAGGTTCACCTACGGAGACCTTGTTACGACTTTTAC
>4be2c7282fbc40f06471db5ad8ff8803
AAAAGTCGTAACAAGGTCTCCGTTGGTGAACCAGCGGAGGGATCATTACCGAGTTTACAACTCCCAAACCCATGTGAACATTACCTCTATGTTGCTTCGGCGGAGCCGCCCCGGCGCCCGGAACCCCCTGCGGTCCCGCGGCCCGGAACCAAGGCGCCCGCCGGAGGCCACAAACTCTTCTGTTTTTACAGTTTCTTCTGAGTGTGCCGCAAGGCAGTATACAAATGAATCAAAACTTTCAACAACGGATCTCTTGGTTCTG
>0e9ac4d9be7d0ff20e9ca7a2670b5aac
CCAGAACCAAGAGATCCGTTGTTAAAAGTTTTAATTTATTAATTAAGTTTACTCAGACTGCAAAGTTACGCAAGAGTTTGAAGTGTCCACCCGGAGCCCCCGCCCGAAGGCAGGGTCGCCCCGGAGGCAACAGAGTCGGACAACAAAGGGTTATGAACATCCCGGTGGTTAGACCGGGGTCACTTGTAATGATCCCTCCGCAGGTTCACCTACGGAGACCTTGTTACGACTTTTA
>8663469296cc34fd95d98e233185527b
GTAAAAGTCGTAACAAGGTTTCCGTAGGTGAACCTGCGGAAGGATCATTAGTGAATATTAGGACATCGCTTCGGCGAGTTCGACCCTCCACTTTTCAACTCTGTGCATTTATTGGCGGAATCGAGCGAGCAATCGTGAAGTTCTGCGTCTCATTTTTAAACACTAGTCAAAGTATGTAACGAAATATCGAAATAAAAAAAAACTTTCAACAACGGATCTCTTGGCTCTCGC
>79f2a7fa8937812b993bc1d5d80ad579
ATCGATGCCAGAACCAAGAGATCCGTTGTTGAAAGTTTTATAGTATTATAAAAGTACTCAGACGACACTGATTCAGAATAATCCTGCCCGAAGGCAAGGCAACCGGTCAAACAACAAGAAAGGGAGATTGTGTTTCCACAACTCGGTAATGATCCCTCCGCAGGTTCACCTACGGAGACCTTGTTACGACTTGTACTTCCTCTAAATGACCA
>2db54b74a57e2a71f60d9b6eeb172d75
GTAAAAGTCGTAACAAGGTTTCCGTAGGTGAACCTGCGGAAGGATCATTACAGTGTTCGCTGCCCTCACGGGTAGCAAACCTCACCCTTGTGTATTATATCTTTGTTGCTTTGGCACGCCGCCTTCGGGCACCGGCTTAGCTGGCTCGTGCGTGTCAGAGAACCTAAAACTCTGAATGTTAGTGTCGTCTGAGTACTATCTAATAGTTAAAACTTTCAACAACGGATCTCTTGGTTCTGGC
>8289b91aeb55768204dc28d92ad47799
CGAGAGCCAAGAGATCCGTTGTCAAAAGTTGTTTCAAATTTTTATATTTGATTAAGACTTGGGTTATAAAATGGGTGTAATAAAATAACCAGCGGGTATGCAAACTGAACTTACCAGAAGGAATGGTCCCGCCAGAGACTATAAACGGTTCACAAGTGGGTTTACTAGGACTGTTTTTTAGGCAGACGCTAGCGTTTTAAGAGGGCTCTAAAGCCTTTCTTTTATTAATGATCCAACCGCAGGTTCACCTACGGTTACCTTGTTACGACTTTTA
>aab1f1cf61e99f0b19b14fbec058a6cd
GCGAGAGCCAAGAGATCCGTTGTTGAAAGTTTTTTTTTATTTCGATATTTCGTTACATACTTTGACTAGTGTTTAAAAATGAGACGCAGAACTTCACGATTGCTCGCTCGATTCCGCCAATAAATGCACAGAGTTGAAAAGTGGAGGGTCGAACTCGCCGAAGCGATGTCCTAATATTCACTAATGATCCTTCCGCAGGTTCACCTACGGAAACCTTGTTACGACTTTTAC
>70c85358e6d36eef4fa43c7941e35715
TAAAAGTCGTAACAAGGTTTCCGTAGGTGAACCTGCGGAAGGATCATTACCGAGTGCGGGCTGCCTCCGGGCGCCCAACCTCCCACCCGTGACTACCTAACACTGTTGCTTCGGCGGGGAGCCCTCTCGGGGGCGAGCCGCCGGGGACTACTGAACTTCATGCCTGAGAGTGATGCAGTCTGAGTCTGAATATAAAATCAGTCAAAACTTTCAACAATGGATCTCTTGGTTCCGG
>809750d3e37132eeb04e655d38e1ae44
TAAAAGTCGTAACAAGGTTTCCGTAGGTGAACCTGCGGAAGGATCATTAGTGAATATTAGGACATCGCTTCGGCGAGTTCGACCCTCCACTTTTCAACTCTGTGCATTTATTGGCGGAATCGAGCGAGCAATCGTGAAGTTCTGCGTCTCATTTTTAAACACTAGTCAAAGTATGTAACGAAATATCGAAATAAAAAAAAACTTTCAACAACGGATCTCTTGGCTCTCG
>73cafd6f1cbf1cc9a3ec463a45d38d10
GAGAGCCAAGAGATCCGTTGTCAAAAGTTGTTTTTTTTTATATTTAAAAAATTTAAGATCAATTTAAAGGGGTTTTTTGAAAATGCTGGGCAAATCATAGAGACTTGCCCAAAATACTATATGATTGCACAAAGGGTTGGTTAATGTTTCAGTCCTTGACAAACCAAGGCTTGAAGGATTCCTGAAACACTATTCATTTTTTAATGATCCAACCGCAGGTTCACCTACGGTTACCTTGTTACGACTTTT
>845fe1204b78abc8d446b2a1362599c1
CGAGAGCCAAGAGATCCGTTGTTAAAAGTTTTGTTTTTGTTATGATATTACATTCATTACTAACAGTTTGTGATGGCCGAAGCCACAGTTCACGGTGTGTATGGAAACCCTCTTCTTGCGAAGAGAGCAGATCTAACCCAATGATTTGCATCAGAGGGCACTATTAATGATCCTTCCGCAGGTTCACCTACGGAAACCTTGTTATGACTTTTA
>313637bf77ee7ed7dac7fe96b00f41f0
AAAGTCGTAACAAGGTAACCGTAGGTGAACCTGCGGTTGGATCATTATTAAATGTAAGCTTTAGAGCTTTCTAAAAACGCTTGGGCGGCTGTGAAAACAGTTTGTCCAGGTCAACCTTGTGTGAATCGTTTATTGTCTCTGGCAAGCCCGAGTTTATTCTCAACTTGCCAGTCTTTTTTGTTAACACCTTTTTTTATAAAACAAGTCTTAATCAAATATATAAATTTGAAACAACTTTTGACAACGGATCTCTTGGCTCT
>5da0985436e99d574aabca781d187dd0
GCGAGAGCCAAGAGATCCGTTGTCAAAAGTTGTTTCAAATTTATATATTTGATTAAGACTTGTTTTATAAAAAAAGGTGTTAACAAAAAAGACTGGCAAGTTGAGAATAAACTCGGGCTTGCCAGAGACAATAAACGATTCACACAAGGTTGACCTGGACAAACTGTTTTCACAGCCGCCCAAGCGTTTTTAGAAAGCTCTAAAGCTTACATTTAATAATGATCCAACCGCAGGTTCACCTACGGTTACCTTGTTACGACTTTTAC
>b7fa6962a222ccf3a5d3a979810f512f
AGAGCCAAGAGATCCATTGTTAAAAGTTGTCATTTTAGTTTTACAACTGTAACTCTGTCAAACATACAAGCGTCTATGTGGCTGGCAAGGACTTGCGCCCTCACACAACCGGAGCAGGACTTGCGTCCCACCCAACCAAAGCCGGCATTGCTGCCAGGCTCGGGGTAAATATATGCGTCAAGCCCGAGGGCTCGGCCGCATAGCAGATTTGTTAATGATCCTTCCGCAGGTTCACCTACGGAAACCTTGTTACGACTTT
>2f62fbd5522104fa5036d41b27a9e0e0
AGAACCAAGAGATCCGTTGTTAAAAGTTTTAATTTATTAATTAAGTTTACTCAGACTGCAAAGTTACGCAAGAGTTTGAAGTGTCCACCCGGAGCCCCCGCCCGAAGGCAGGGTCGCCCCGGAGGCAACAGAGTCGGACAACAAAGGGTTATGAATAACCAGGCCGAAGCCCGGGCGTTCTTGTAATGATCCCTCCGCAGGTTCACCTACGGAGACCTTGTTACGACTTT
>00fa295a45616b08d495b0e8b5ecdb48
TAAAAGTCGTAACAAGGTTTCCGTAGGTGAACCTGCGGAAGGATCATTAGTGAATTATAGGGCGTCGTTCACTTCGGTGACGAGCCTGACCTCCACTTTCTAACTCTGTGCATTTTATTGGTGAGCAACGAACGACCCCGGCTTCGGCCGGGCGAGTGAAGTGCTTACGGCTCATTTTAAACACCAGTCAAAGTATGTAACGAAATATCGAAATAAAAAAAAACTTTCAACAACGGATCTCTTGGCTCTCG
>26c6c33ead593882b4f3ca0246445614
AAGAGCCAAGAGATCCATTGTTAAAAGTTGTCATTTTAATAAGTGTATCATACTCTGTCAAACATATACAAGCGTCTATGTGGATCGGCTTGCGCCTCTCCGCTACCAGCCATGGCTCGCACCAGGCCGATAACACCTTGCCCGGCATTTTACCGCACGGGTTCGGGTTTATATATGCATACCAGAACGATCCCCAAAGGGGACCAGCTCTGGTAGCAACATGATTTGTTAATGATCCTTCCGCAGGTTCACCTACGGAAACCTTGTTACGACTTTT
>159187f8a3732fb5eb7e8c7d2db9a911
GCGAGAGCCAAGAGATCCGTTGTTGAAAGTTTTTTTTTGTTTTTTATTTCATTACATACTTTGACTAATGTTTAAAATGAAGCCGCAAGGTAGTTTCACTCGAAAGTTCCATTACCTCGCCATCAAGTGCACAGTGTTAGAAGTGGAGGTCAGGCTCTACAAGTAGACGCCCTATAATTCACTAATGATCCTTCCGCAGGTTCACCTACGGAAACCTTGTTACGACTTTTAC
>ae687040b2ea60d06ca9d41180c22b72
GTAAAAGTCGTAACAAGGTAACCGTAGGTGAACCTGCGGTTGGATCATTATTAAATGTAAGCTTTAGAGCTTTCTAAAAACGCTTGGGCGGCTGTGAAAACAGTTTGTCCAGGTCAACCTTGTGTGAATCGTTTATTGTCTCTGGCAAGCCCGAGTTTATTCTCAACTTGCCAGTCTTTTTTGTTAACACCTTTTTTTATAAAACAAGTCTTAATCAAATATATAAATTTGAAACAACTTTTGACAACGGATCTCTTGGCTCTCGC
>7a6b40c3bc0bfd326f4c231c8cc8767c
AAAAGTCGTAACAAGGTTTCCGTAGGTGAACCTGCGGAAGGATCATTACAGTAGTCGCCTGGGTTGCCGCAAGGCCTCCCGGGTAACCTACCACCCTTTGTTTATTACACTTTGTTGCTTTGGCAGGCCTGCCCTCGGGCTGCTGGCTCCGGCCGGCGAGCGCTTGCCAGAGGACCTAAACTCTGTTTGTCTATACTGTCTGAGTACTATATAATAGTTAAAACTTTCAACAACGGATCTCTTGGTTCTG
>1620363c1ebb754ef5725af8106043e1
CAGAACCAAGAGATCCGTTGTTGAAAGTTTTAACTATTATATAGTACTCAGACAGTATAGACAAACAGAGTTTAGGTCCTCTGGCAAGCGCTCGCCGGCCGGAGCCAGCAGCCCGAGGGCAGGCCTGCCAAAGCAACAAAGTGTAATAAACAAAGGGTGGTAGGTTACCCGGGAGGCCTTGCGGCAACCCAGGCGACTACTGTAATGATCCTTCCGCAGGTTCACCTACGGAAACCTTGTTACGACTTTT
>10e70ff625c80bd8cdd695ae497d9fbe
GCCAGAACCAAGAGATCCGTTGTTGAAAGTTTTAACTATTAGATAGTACTCAGACGACACTAACATTCAGAGTTTTAGGTTCTCTGACACGCACGAGCCAGCTAAGCCGGTGCCCGAAGGCGGCGTGCCAAAGCAACAAAGATATAATACACAAGGGTGAGGTTTGCTACCCGTGAGGGCAGCGAACACTGTAATGATCCTTCCGCAGGTTCACCTACGGAAACCTTGTTACGACTTTTAC
>b9ea3e55ad6e1f0875f7834312a48677
CAGAACCAAGAGATCCGTTGTTGAAAGTTTTATTAATGGTTACGTTTTTAAGACGTCTGCTGTAGTCAAAGAAGAGGGAGAAGAGATCGGCCATCCACCCGCGGCGCGGGCCCCGGTCGAGGGGACGATGTCCTCCCCGGGGGACCCGCGTGCGTGGCGATGTCGGAGTGGGGTAGTCAAGGATGGGAGATGGGGCCCGGGGGGACCCACACACTCGTTAATGATCCTTCCGCAGGTTCACCTACGGAAACCTTGTTACGACTTTT
>208e5c3dead54a7a71932b8af557b9a3
AAAAGTCGTAACAAGGTTTCCGTAGGTGAACCTGCGGAAGGATCATTACAAATCCATCCACGTCTCAACACGCTTGAGACCACGTTGAAATGTTCCCTAGTCAGACGTGCCCCTTCGGGTGCGCGCCTGGCTAGGCTGTTAAACTAGTGTTTCCTTGTTGCTCAAATGTATCCTGTCTGCATCCTAACGGAGGCTAAGACTTGAAAACTTGTACAACTTATAACAATGGATCTCTAGGCTCTT
>f5796e7c672f053483584c2c01e59353
CGAGAGCCAAGAGATCCGTTGTTGAAAGTTTTTTTTTATTTCGATATTTCGTTACATACTTTGACTGGTGTTTAAAATGAGCCGTAAGCACTTCACTCGCCCGGCCGAAGCCGGGGTCGTTCGTTGCTCACCAATAAAATGCACAGAGTTAGAAAGTGGAGGTCAGGCTCGTCACCGAAGTGAACGACGCCCTATAATTCACTAATGATCCTTCCGCAGGTTCACCTACGGAAACCTTGTTACGACTTTTA
>d941d96bbd260843b79cbf1e87d69f1e
GTAAAAGTCGTAACAAGGTTTCCGTAGGTGAACCTGCGGAAGGATCATTACCGAGTTCATGCCCTTACGGGTAGATCTCCCACCCTTTGTATACTATACCTTTGTTGCTTTGGCGGGCCGCCTAGCTACTGGCTTCGGCTGGTAAGTGCCCGCCAGAGGACCCAAAACCCTGAATTATTAGTGTCGTCTGAGTAAAATTTTAATATTTAAAACTTTCAACAACGGATCTCTTGGCTCTGGC
>52bbcf216ea94c3630a241295475f38f
GTAAAAGTCGTAACAAGGTTTCCGTAGGTGAACCTGCGGAAGGATCATTGCACACACAAGTTGCAGCCAACCCGCGGCGAACGAACACATTGTCCCCCTCGGTGGGTCGTGGCGCCTCGCGGCGTCGCGGCCTGCCGTCTCCCTTCGTCACGAGGTCGTGACCTCGCGGCGTCGGGTCTCCACGATGCGTCCACCTTGACCTAATGACTGAGTCCCTTTTACTCAATGGGAGTGAGCTCCGCGCCCCGCTTGGCTTCGCTGAGTGGGCCGGCGCTGGTTACCTTGCGAGTTGAAACATAACCAAAAACAACTCTCAGCAACGGATATCTTGGCTCTTGC
>f57c9b073e9d5c274c460b2928734136
ATGCCTGAACCAAGAGATCCGTTGCTGAAAGTTTTATTAAACTTTTATAATTTCAACAGCTTAACTGCTTGGACATTCTAGTAAACATTTTAAAACAGTGGTTTGTAATAGAAGATTATGAGTTTTTACACTCAATAATTAATCACTAATGATCCTTCCGCAGGTTCACCTACGGAAACCTTGTTACGACTTTTACTTCCTCTAAATG
>cae92ddce7d6c7e941e0ac8585c81a06
AGAACCAAGAGATCCGTTGTTGAAAGTTTTAACTATTATATAGTACTCAGACGACACTAACATTCAGAATTTGGGGTCCTCTGGCGGGCACGATCCAGCGTGAGCCGGTGCCCGAAGGCGGCCTACCAAAGCAACAAAGATATAATTATACAAGGGTGGGGTTTCTACCCGTGAGGGCAGGAACACTGTAATGATCCTTCCGCAGGTTCACCTACGGAAACCTTGTTACGACTTT
>b5732f1ed8c608611dff658c5f09a823
TAAAAGTCGTAACAAGGTTTCCGTAGGTGAACCTGCGGAAGGATCATTAGTGAATTATAGGGCGTCTACTTGTAGAGCCTGACCTCCACTTCTAACACTGTGCACTTGATGGCGAGGTAATGGAACTTTCGAGTGAAACTACCTTGCGGCTTCATTTTAAACATTAGTCAAAGTATGTAATGAAATAAAAAACAAAAAAAAACTTTCAACAACGGATCTCTTGGCTCTCG
>41e7eff34f833f093a29628cefe741a3
AGAACCAAGAGATCCGTTGTTGAAAGTTGTAATTATTAAATTTTTCAGACGCTGATTTAAAATTAAAAGGGTTATAGGTTGTCCAGCTGGCAGGCAAGCCTGCCAAGGAAACTTGGGTACTCAAAAGACAAGGAAGGAGAGAAGGGACCGAAATCCCCCTCATAACAGTGGAAATCCACCGAAATTAATGATCCTTCCGCAGGTTCACCTACGGAAACCTTGTTACGACTTT
>91167ac74047c3e8e940bbc04b03efe8
AAAGTCGTAACAAGGTTTCCGTAGGTGAACCTGCGGAAGGATCATTACAGTGTTCCTGCCCTCACGGGTAGAAACCCCACCCTTGTATAATTATATCTTTGTTGCTTTGGTAGGCCGCCTTCGGGCACCGGCTCACGCTGGATCGTGCCCGCCAGAGGACCCCAAATTCTGAATGTTAGTGTCGTCTGAGTACTATATAATAGTTAAAACTTTCAACAACGGATCTCTTGGTTCT
>a2a64cd2dc88536ca2a74953866f6f7c
GTAAAAGTCGTAACAAGGTTTCCGTAGGTGAACCTGCGGAAGGATCATTACAGAGAATATCGCCCTCGCGGGTGACTCTCCAACCCTGTGTTATTGTACCTTTGTTGCTTTGGCGAGCCGCCTCGGCCACCGGCTCACGCTGGTGAGTGCTCGCCAGAGAACCCCAAATTCTGAATTATTAGTGTCGTCTGAGTACTATATAATAGTTAAAACTTTCAACAACGGATCTCTTGGTTCTGGC
>ea328e25d03caea09cf1f498b4fdd8fa
GGAACCAAGAGATCCATTGTTGAAAGTTTTAACTGATTGCGATACAATCAACTCAGACTTCACTAGATCAGACAGAGTTCGTGGTGTCTCCGGCGGGCGCGGGCCCGGGGCTGAGAGCCCCCGGCGGCCATGAATGGCGGGCCCGCCGAAGCAACTAAGGTACAGTAAACACGGGTGGGAGGTTGGGCTCGCTAGGAACCCTACACTCGGTAATGATCCTTCCGCAGGTTCACCTACGGAAACCTTGTTACGACTTT
>7c95b5ac70f1cf8726017c40c3aee1c1
AAAGTCGTAACAAGGTCTCCGTAGGTGAACCTGCGGAGGGATCATTACAAGAACGCCCGGGCTTCGGCCTGGTTATTCATAACCCTTTGTTGTCCGACTCTGTTGCCTCCGGGGCGACCCTGCCTTCGGGCGGGGGCTCCGGGTGGACACTTCAAACTCTTGCGTAACTTTGCAGTCTGAGTAAACTTAATTAATAAATTAAAACTTTTAACAACGGATCTCTTGGTTCT
>eee34bfa2dafc62308707de8665a4d45
AAAGTCGTAACAAGGTTTCCGTAGGTGAACCTGCGGAAGGATCATTACCGAGTGTAGGGTTCCTAGCGAGCCCAACCTCCCACCCGTGTTTACTGTACCTTAGTTGCTTCGGCGGGCCCGCCATTCATGGCCGCCGGGGGCTCTCAGCCCCGGGCCCGCGCCCGCCGGAGACACCACGAACTCTGTCTGATCTAGTGAAGTCTGAGTTGATTGTATCGCAATCAGTTAAAACTTTCAACAATGGATCTCTTGGTTCC
>c9b635d839fb2d6f4b32ec4b456a02d7
AAAAGTCGTAACAAGGTATCCGTAGGTGAACCTGCGGATGGATCATTAGTGAATGCGGCGCGCCGCGCGCAAGCGAGGCGTCGCCAGCAACCCACCCTTGTGCAATGTACCGTACCCTGGCGGGGGCCTTTGGGCTTCCGCCGAAGGGAGGCTGCCTTTCGGGGCGGCTTTCCGAACCAACACGTTAACCACCGACTGACATCCAAGTAATTTAATGTTAAACAACTTTTGACAACGGATCTCTTGGCTCTC
>82a3febe0e6c28a60aef83a474e82283
TAAAAGTCGTAACAAGGTTTCCGTAGGTGAACCTGCGGAAGGATCATTCATAATAAGTGTTTTACTGCACTTTTTAAACAAGTACTCACCTTGTGTGCAATGTTTGCTGTCGTGTCGTTTGTTCGTCTCGACAGCACAATACCAACCTTTTATTGTAAATTTTTTGTCTGAAGCTATTTCGAATACATAATTCTAAATACAACTTTCAACAACGGATCTCTTGGCTCTCG
>79dfc41f1be2ee47a18cb5eebe19266c
AAAAGTCGTAACAAGGTTTCCGTAGGTGAACCTGCGGAAGGATCATTAACGAGTGTGTGGGTCCCCCCGGGCCCCATCTCCCATCCTTGACTACCCCACTCCGACATCGCCACGCACGCGGGTCCCCCGGGGAGGACATCGTCCCCTCGACCGGGGCCCGCGCCGCGGGTGGATGGCCGATCTCTTCTCCCTCTTCTTTGACTACAGCAGACGTCTTAAAAACGTAACCATTAATAAAACTTTCAACAACGGATCTCTTGGTTCTG
>402f81b3ccb3c18669187330a9d9fc07
AAAAGTCGTAACAAGGTCTCCGTTGGTGAACCAGCGGAGGGATCATTACAGAGCTTAACAACTCCCAAACCCCTGTGAACATACCACCGTTGCTTCGGCGGGTACGCCCCGGGCGCGCGCAAGCGTGCCCCGGAACCAGGCGCCCGCCGGGGGAAACAAACTCTTGTCTTACTTTTGTATCGTCTGAGTGGATTATTAAATAAATCAAAACTTTCAACAACGGATCTCTTGGCTCTG
>cae51ad56934697fe2741bad71726bb8
CCGGAACCAAGAGATCCATTGTTGAAAGTTTTGACTGATTTTATATTCAGACTCAGACTGCATCACTCTCAGGCATGAAGTTCAGTAGTCCCCGGCGGCTCGCCCCCGAGAGGGCTCCCCGCCGAAGCAACAGTGTTAGGTAGTCACGGGTGGGAGGTTGGGCGCCCGGAGGCAGCCCGCACTCGGTAATGATCCTTCCGCAGGTTCACCTACGGAAACCTTGTTACGACTTTTA
>a195bef9835513ef8a47352273e282bd
TAAAAGTCGTAACAAGGTTTCCGTAGGTGAACCTGCGGAAGGATCACTAGTGATTAAATCGAGAGCGTCTTCATTGACCTCTCACCCTTCACATCCACATACACCTGTGCACCGTTTGGCTCTTATAAAAGACGCAAGTCTGCAATGAGAGTCATCAATTTTATACATACCCCAGTCTTATGAATGTAACAGTTTTAATAAACATAATAAAACTTTTAACAACGGATCTCTTGGTTCTCG
>6c996be459152d451751a41fe33afeeb
GTAAAAGTCGTAACAAGGTTTCCGTAGGTGAACCTGCGGAAGGATCATTAACAAATCATGGTAGCACACTGGAGCAATCTGGTGTTGCCCACATAAACCCGAACCTGTGCAGCAATGCCAGGCGAGGTGTAGGGCCTTCGGGTCCTGCGGTGAAGAGTTATGGAGAGTTTTCTCTGCATGGCCTGGATCCACATAGACGCTTTTTTAGTTTGACAGTATCAGTTGACACAATCAAAATGACAACTTTTAACAATGGATCTCTTGGCTCTTGC
>56b20c8b6d3b4af249de9272ba1a0a61
GAGAGCCAAGAGATCCGTTGTCAAAAGTTGTTTAACATTAAATTACTTGGATGTCAGTCGGTGGTTAACGTGTTGGTTCGGAAAGCCGCCCCGAAAGGCAGCCTCCCTTCGGCGGAAGCCCAAAGGCCCCCGCCAGGGTACGGTACATTGCACAAGGGTGGGTTGCTGGCGACGCCTCGCTTGCGCGCGGCGCGCCGCATTCACTAATGATCCATCCGCAGGTTCACCTACGGATACCTTGTTACGACTTTT
>0c6f1f4633a60b3a096cf103b5e5c6de
TAAAAGTCGTAACAAGGTTTCCGTAGGTGAACCTGCGGAAGGATCATTACAAATTAGTTGTGATTGTGTGCGTGGGATTGGATGAGAAATCGTTCAGTCTCAGCCACAATCGCTTAAGCCCACTCCTGAAAGGGAGATGGACGCACACTGTTAAAGGTGTGCAAATAGACTTTAAATCATGACTTATTCCAAAAAGAAAATAACCAAAACTTTTAACAATGGATCTCTTGGCTCTTG
>235868d7486bb127c240097fb99aa604
GTAAAAGTCGTAACAAGGTTTCCGTAGGTGAACCTGCGGAAGGATCATTACCGAGTGAGGGCCCTCTGGGTCCAACCTCCCACCCGTGTTTATTTTACCTTGTTGCTTCGGCGGGCCCGCCTTAACTGGCCGCCGGGGGGCTTACGCCCCCGGGCCCGCGCCCGCCGAAGACACCCTCGAACTCTGTCTGAAGATTGTAGTCTGAGTGAAAATATAAATTATTTAAAACTTTCAACAACGGATCTCTTGGTTCCGGC
>a44e080c07969fa9d86d2b02fb0ccd6a
TAAAAGTCGTAACAAGGTTTCCGTAGGTGAACCTGCGGAAGGATCATTACAGTGTTCGCTGCCCTCACGGGTAGCAAACCTCACCCTTGTGTATTATATCTTTGTTGCTTTGGCACGCCGCCTTCGGGCACCGGCTTAGCTGGCTCGTGCGTGTCAGAGAACCTAAAACTCTGAATGTTAGTGTCGTCTGAGTACTATCTAATAGTTAAAACTTTCAACAACGGATCTCTTGGTTCTGG
>b5eeb89d0d6fdd98e053340b4063a4b6
GCAAGAGCCAAGATATCCGTTGCTGAGAGTTGTTTTTGGTTATGTTTCAACTCGCAAGGTAACCAGCGCCGGCCCACTCAGCGAAGCCAAGCGGGGCGCGGAGCTCACTCCCATTGAGTAAAAGGGACTCAGTCATTAGGTCAAGGTGGACGCATCGTGGAGACCCGACGCCGCGAGGTCACGACCTCGTGACGAAGGGAGACGGCAGGCCGCGACGCCGCGAGGCGCCACGACCCACCGAGGGGGACAATGTGTTCGTTCGCCGCGGGTTGGCTGCAACTTGTGTGTGCAATGATCCTTCCGCAGGTTCACCTACGGAAACCTTGTTACGACTTTTAC
>72c9791b44b07ff92b94b5c0bdafc020
AAAGTCGTAACAAGGTTTCCGTAGGTGAACCTGCGGAAGGATCATTAATTTCGGTGGATTTCCACTGTTATGAGGGGGATTTCGGTCCCTTCTCTCCTTCCTTGTCTTTTGAGTACCCAAGTTTCCTTGGCAGGCTTGCCTGCCAGCTGGACAACCTATAACCCTTTTAATTTTAAATCAGCGTCTGAAAAATTTAATAATTACAACTTTCAACAACGGATCTCTTGGTTCT
>1aeac12c99ff308a20d286e90a35ee7b
AAAAGTCGTAACAAGGTAACCGTAGGTGAACCTGCGGTTGGATCATTATTGAATTCAACTCTTGGAAGGTCTTCCTGTTTCGGCAGGTTGGCCATCCATTTACCCCAATGTGAACTTGTTTTTGTATTTAGTCTCTGGTAGGGACTAGGGACCAATTTTTATTAATTGGCTCTCATAGCCTGCCAGAAGACTATGATTAAACTCCTTCTTTGTTATCCATTCTAGCCTAAGACCATTATAAAAAGTTAATAACTTTAAACAACTTTTGACAACGGATCTCTTGGCTCTC
>e246e00933fd6a2c6fb0363308176554
GCCAGAGCCAAGAGATCCGTTGTTGAAAGTTTTAAATATTAAAATTTTACTCAGACGACACTAATAATTCAGGGTTTTGGGTCCTCTGGCGGGCACTTACCAGCCGAAGCCAGTAGCTAGGCGGCCCGCCAAAGCAACAAAGGTATAGTATACAAAGGGTGGGAGATCTACCCGTAAGGGCATGAACTCGGTAATGATCCTTCCGCAGGTTCACCTACGGAAACCTTGTTACGACTTTTAC
>2779439e4af1fd6affe79cb50b780f05
GTAAAAGTCGTAACAAGGTTTCCGTAGGTGAACCTGCGGAAGGATCATTCATAATAAGTGTTTTATGGCACTTTTAAAAATCCATATCCACCTTGTGTGAAATGTCTGTCGCTCTTCTCCCTTTTTTCCTCGGAAAAAAAAGAAAGCGACTCCACATCAACTCATTTTAATTACTTTGTCTGAAAAATATTATGAATAAACTAATTCAAAATACAACTTTCAACAACGGATCTCTTGGCTCTCGC
>a3422012654fd03e100f693ccdfb5371
AAGAGCCTAGAGATCCATTGTTATAAGTTGTACAAGTTTTCGTTTGATGGAAATCAAGATACATTTGGGCAACAAAGTAACACTCGTTTCACAGCCCAGGCCAGGGGAGGCCTCCTCTCCCAGGCAGGCGCACCAAGACGGGAAGTCAAGGCAGCCGGAAAGGAAGCGGAGACCCTCCTGGTCTGGGGAACATTTCAACGTGGTCTCAGAGAGAGACGTGGATGGATTTGTAATGATCCTTCCGCAGGTTCACCTACGGAAACCTTGTTACGACTTTT
>92226ae32ed6f8c4e3d1c2978f2f8b94
AGAGCCAAGAGATCCGTTGTCAAAAGTTGTTTCAAATTTATATATTTGATTAAGACTTGTTTTATAAAAAAAGGTGTTAACAAAAAAGACTGGCAAGTTGAGAATAAACTCGGGCTTGCCAGAGACAATAAACGATTCACACAAGGTTGACCTGGACAAACTGTTTTCACAGCCGCCCAAGCGTTTTTAGAAAGCTCTAAAGCTTACATTTAATAATGATCCAACCGCAGGTTCACCTACGGTTACCTTGTTACGACTTT
>177b90c370fc4799230f2e472873fb35
TAAAAGTCGTAACAAGGTTTCCGTAGGTGAACCTGCGGAAGGATCATTAACAAATCTGCTATGCGGCCGAGCCTTCGGGCTTGACGCATATATTTACCCCGAGCCTGGCAGCAATGCCGGCTTTGGTTGGGTGGGATGCAAGTCCTGCTCCGGTTGTGTGAGGGCGCAAGTCCTTGCCAGCCACATAGACGATTGTATGTTTGACAGAGTTACAGTTGTAAAACTAAAATGACAACTTTTAACAATGGATCTCTTGGCTCTTG
>a63cca397cd52750d7f5d7772a15a0ae
GTAAAAGTCGTAACAAGGTTTCCGTAGGTGAACCTGCGGAAGGATCATTAACGAGTGAGGGTCCCACCGGGCCCCATCTCCCATCCGTGTCTATCCTACCCTGCCCCCGATCCGACGGACGCTTAAGCGGGAGGAGGTTGGACTCATCCCCTCCGCTCGCTGCCGACCCTATGGACGGATGGCTTACCTTTTCTCTAAAATCTTGACTATAGAGAACGTCCTAAAAACGTAATCGCAATATAAAACTTTCAACAACGGATCTCTTGGTTCTGGC
>fd06172bc623b99269f197b030537cde
AGAGCCTAGAGATCCGTTGTCAAAAGTTGTTTCAATTGATTTTAGGATAAGACAGTCAAGACAATGTTTAATATTTTGGCCCATTACAGGCCAAACAAACAATTCACAGGGGTTAAAGGCCCGAGGGCCAGAGACCGCATCAGCCGAAACTGACCGGCCCCTTTAGGTTCACTAATGATCCAACCGCAGGTTCACCTACGGTTACCTTGTTACGACTTT
>6b8220340f047660fdd58bcc1a643086
CCAGAACCAAGAGATCCGTTGTTGAAAGTTTTAACTATTAGATAGTACTCAGACGACACTAACATTCAGAGTTTTAGGTTCTCTGACACGCACGAGCCAGCTAAGCCGGTGCCCGAAGGCGGCGTGCCAAAGCAACAAAGATATAATACACAAGGGTGAGGTTTGCTACCCGTGAGGGCAGCGAACACTGTAATGATCCTTCCGCAGGTTCACCTACGGAAACCTTGTTACGACTTTTA
>800f6f656af4cc51d8d70e6d41456b2e
CAGAGCCAAGAGATCCGTTGTTGAAAGTTTTGATTTATTTAATAATCCACTCAGACGATACAAAAGTAAGACAAGAGTTTGTTTCCCCCGGCGGGCGCCTGGTTCCGGGGCACGCTTGCGCGCGCCCGGGGCGTACCCGCCGAAGCAACGGTGGTATGTTCACAGGGGTTTGGGAGTTGTTAAGCTCTGTAATGATCCCTCCGCTGGTTCACCAACGGAGACCTTGTTACGACTTTT
>2e1d5e7a44c75c75774d2297b12eeae8
CCAGAACCAAGAGATCCGTTGTTGAAAGTTTTATTAATGGTTACGTTTTTAAGACGTCTGCTGTAGTCAAAGAATGGGGAGAAGAGCGCGTTCATCCACCCGCGGCACGGGCACCGGTCGGGGGGAAAGTCCCCCCCGGGGGCCGCGTGTGCGGGACGATGTCGGGGTAGGGTAGTCAAGGATGGGAGATGGGGCCCGGAGGGACCCGCACACTCGTTAATGATCCTTCCGCAGGTTCACCTACGGAAACCTTGTTACGACTTTTA
>6e582198159fd13a9e16cc00d9d65b82
GCCAGAACCAAGAGATCCGTTGTTGAAAGTTTTAACTATTATATAGTACTCAGACAATATTAACAAACAGAGTTTTGGTATCTTCGACAGTCACTGACCAGCCGGAGCCGGTGGGCCGAAGCCGGGACTGCCAAAGCAACAAAGGTAAATAAACAATGGGTGGGAGGTATACCCCGAAGGGCAACGTCTCTTTAATGATCCTTCCGCAGGTTCACCTACGGAAACCTTGTTACGACTTTTAC
>dd5a24fdbc6ebd9dd0cbc592fa2ff677
GTAAAAGTCGTAACAAGGTTTCCGTAGGTGAACCTGCGGAAGGATCATTAATGAGTTAGGGTCTTTCAGGCCCGATCTCCAACCCTTTGTATAACTACCATGTTGCTTTGGCGGGCCCGTCTTTAATCGGACCGCCGGGAGTTTTGTAACTCTTGGCCAGTGCTCGTCAATAGCCCTTAACAAACTCTTTTAACCATGTTAAATCTGAAAATATTTAAATAAACTAAAACTTTCAACAACGGATCTCTTGGTTCTGGC
>275e4933ad396147dab1969f4f3b7550
AAAAGTCGTAACAAGGTTTCCGTAGGTGAACCTGCGGAAGGATCACTAAAGAGAACTTGCCCTTCGGGGTAGATCTCCCACCCTTTGTTTATTATACTTTGTTGCTTTGGCGGGCCTGCCTCACGGCTGCCGGCGTAAGCTGGCTCGCGCCCGCCAGAGACCCCTAAACTCTGAATATTGTCGTCTGAGTAATATATAATAAGTTAAAACTTTCAACAACGGATCTCTTGGTTCTG
>b0946bc783ec917e2b45e3e62209ef1f
GTAAAAGTCGTAACAAGGTAACCGTAGGTGAACCTGCGGTTGGATCATTACTGATACTTGGTCTATGAGTTGATACCGAAAGGAGTCCTCATAGCCAAATTCACCTCTTGTGCACTATATTGTCTTTTGGTAGTTTATACCTTGGTATAGGCTGCCAAACTTTATAACAAACCATAAAAACTTGTCTGAAATTATAATAAAATATAAACAACTTTTGACAACGGATCTCTTGGCTCTCGC
>a740d26a200c6b07c49624fac7399b15
TAAAAGTCGTAACAAGGTCTCCGTTGGTGAACCAGCGGAGGGATCATTACAGAGCTTAACAACTCCCAAACCCCTGTGAACATACCACCGTTGCTTCGGCGGGTACGCCCCGGGCGCGCGCAAGCGTGCCCCGGAACCAGGCGCCCGCCGGGGGAAACAAACTCTTGTCTTACTTTTGTATCGTCTGAGTGGATTATTAAATAAATCAAAACTTTCAACAACGGATCTCTTGGCTCTGG
>c09441f8e74bb520d689581dabe986f0
AAAGTCGTAACAAGGTAACCGTAGGTGAACCTGCGGTTGGATCATTAGTGAACCTAAAGGGGCCGGTCAGTTTCGGCTGATGCGGTCTCTGGCCCTCGGGCCTTTAACCCCTGTGAATTGTTTGTTTGGCCTGTAATGGGCCAAAATATTAAACATTGTCTTGACTGTCTTATCCTAAAATCAATTGAAACAACTTTTGACAACGGATCTCTAGGCTCT
>3f7e34560372dd864d00ad7c51981b58
CAAGAGCCAAGAGATCCATTGTTAAAAGTTTTGGTTATTTTCTTTTTGGAATAAGTCATGATTTAAAGTCTATTTGCACACCTTTAACAGTGTGCGTCCATCTCCCTTTCAGGAGTGGGCTTAAGCGATTGTGGCTGAGACTGAACGATTTCTCATCCAATCCCACGCACACAATCACAACTAATTTGTAATGATCCTTCCGCAGGTTCACCTACGGAAACCTTGTTACGACTTTTA
>45f1a869dfa3999912d15b96e6fe76f2
GTAAAAGTCGTAACAAGGTTTCCGTAGGTGAACCTGCGGAAGGATCATTCATAATAAGTGTTTTATGGCACTTTTTTAAATCCATATCCACCTTGTGTGCAATGTCAGGGTTGGTCTCTTGAAAAAGAGATCAGCCCCAAACATCAACCCAATCTTAACTCTTTGTCTGAAAAATATTATGAATAAAACAATTCAAAATACAACTTTCAACAACGGATCTCTTGGCTCTCGC
>bf368fe444cc1bcf8b85743eac3a6838
TAAAAGTCGTAACAAGGTTTCCGTAGGTGAACCTGCGGAAGGATCATTAGTGAATTTTAGCGCATCTGCTTGCAGAGCGTGACCTCCACTCTATACACTGTGCACTCATTGACGGAAAAAAACTGACACGATTGGAAACTTTTGTGAAGGTGGTTTTCTGTGGCTCACTTTAAACACCAGTATAAGTATGTAAATAAAAAAAAATAAGAAAAACTTTCAACAACGGATCTCTTGGCTCTCG
>ae087581cb90fe592a9f6c1b9936d7aa
CGAGAACCAAGAGATCCGTTGTTAAAAGTTTTATTATGTTTATTAAAACTGTTACATTCATAAGACTGGGGTATGTATAAAATTGATGACTCTCATTGCAGACTTGCGTCTTTTATAAGAGCCAAACGGTGCACAGGTGTATGTGGATGTGAAGGGTGAGAGGTCAATGAAGACGCTCTCGATTTAATCACTAGTGATCCTTCCGCAGGTTCACCTACGGAAACCTTGTTACGACTTTTA
>a8a3a4da7621d08bbc4c2b286d593202
AAAGTCGTAACAAGGTTTCCGTAGGTGAACCTGCGGAAGGATCATTAAAAAATATAGAATTAATCTTCTGTAAACCCAATCTGCGTATTTCTACCTGTTGCTTTCGTGAGACTGCGAACGCAAGTTCCCTCTGGCGCTGTTTTTAGGAACAGCTGTTGGGGAGTGCTCACGGGAGGTAATTATAAACTCTGTTTTTTTTGAATTTTGTCTGAATATTGTTTATACATAAACTTTAAAACTTTCAACAACGGATCTCTTGGTTCT
>af27321015e27cd2027f0ff208721afc
TAAAAGTCGTAACAAGGTAACCGTAGGTGAACCTGCGGTTGGATCATTAATAAAAGAAAGGCTTTAGAGCCCTCTTAAAACGCTAGCGTCTGCCTAAAAAACAGTCCTAGTAAACCCACTTGTGAACCGTTTATAGTCTCTGGCGGGACCATTCCTTCTGGTAAGTTCAGTTTGCATACCCGCTGGTTATTTTATTACACCCATTTTATAACCCAAGTCTTAATCAAATATAAAAATTTGAAACAACTTTTGACAACGGATCTCTTGGCTCTCG
>a6d83571bc15465edf424c83eeff165f
GCGAGAGCCAAGAGATCCGTTGTTGAAAGTTGTATTTTGAATTAGTTTATTCATAATATTTTTCAGACAAAGTAATTAAAATGAGTTGATGTGGAGTCGCTTTCTTTTTTTTCCGAGGAAAAAAGGGAGAAGAGCGACAGACATTTCACACAAGGTGGATATGGATTTTTAAAAGTGCCATAAAACACTTATTATGAATGATCCTTCCGCAGGTTCACCTACGGAAACCTTGTTACGACTTTTAC
>609f6372ffb71a7fc22918201f0643a9
AAAGTCGTAACAAGGTCTCCGTTGGTGAACCAGCGGAGGGATCATTACCGAGTTTACAACTCCCAAACCCCTGTGAACATACCTATTGTTGCTTCGGCGGGATCGCCCCGGCGCCCTCGGGCCCGGACCCAGGCGCCCGCCGGAGGACCCAAACTCTTGTCTTCATGAGAATCTTCTGAGTAACACAAGCAAATAAATTAAAACTTTCAACAACGGATCTCTTGGTTCT
>5cfce38d2e5581ac1ca6ce6723c09b2e
AAGTAAAAGTCGTAACAAGGTTTCCGTAGGTGAACCTGCGGAAGGATCATTAGTGATTAATTATTGAGTGTAAAAACTCATAATCTTCTATTACAAACCACTGTTTTAAAATGTTTACTAGAATGTCCAAGCAGTTAAGCTGTTGAAATTATAAAAGTTTAATAAAACTTTCAGCAACGGATCTCTTGGTTCAGGCATCGATGAAGAA
>3bece8ccbc3eae7a7ec9e933de4933cc
ACAAGTCGTAACAAGGTTTCCGTAGGTGAACCTGCGGAAGGATCATTACCAGAGAGGAGCCAGTTCTCCTCGGGGCTCGGCCCCGCGGGCTCCGTCCCGTTTCTCCCCCCCGTGTCTACCTACCTTTGTTGCTTTGGCGGGCCGGGGGCCTCTGCCCCCCCCCACGGCTTGGACGGTGGCCTCGCGTTCGCGCGGATGGCCACCGCCGGCGGGGGTTGTGCCCGTCCATCGCCCTTATCCAACCCTGTTTATCAGTGTCGTCCGAGTCCACAAGAACAATCGTGAAAACTTTCAACAACGGATCTCTTGGTTCTG
>6287d93b9df797ba244283fd69e81a2a
TAAAAGTCGTAACAAGGTTTCCGTAGGTGAACCTGCGGAAGGATCATTAACGAGTGTGCGGGTCCCTCCGGGCCCCATCTCCCATCCTTGACTACCCTACCCCGACATCGTCCCGCACACGCGGCCCCCGGGGGGGACTTTCCCCCCGACCGGTGCCCGTGCCGCGGGTGGATGAACGCGCTCTTCTCCCCATTCTTTGACTACAGCAGACGTCTTAAAAACGTAACCATTAATAAAACTTTCAACAACGGATCTCTTGGTTCTGG
>b9e1ea1d5692122a3e0cfbb2fa9c6aac
CAGAACCAAGAGATCCGTTGTTGAAAGTTTTAACTTATTATATATTACTCAGACGACAATATTCAGAGTTTAGGGGTCTCTGGCGGGCGCGAGCCAGCTTACGCCGGCAGCCGTGAGGCAGGCCCGCCAAAGCAACAAAGTATAATAAACAAAGGGTGGGAGATCTACCCCGAAGGGCAAGTTCTCTTTAGTGATCCTTCCGCAGGTTCACCTACGGAAACCTTGTTACGACTTTT
>35d0816926575eb5ed5e06820f242d40
AGAACCAAGAGATCCGTTGTTGAAAGTTTTAAAGTTTATGTATAAACAATATTCAGACAAAATTCAAAAAAAACAGAGTTTATAATTACCTCCCGTGAGCACTCCCCAACAGCTGTTCCTAAAAACAGCGCCAGAGGGAACTTGCGTTCGCAGTCTCACGAAAGCAACAGGTAGAAATACGCAGATTGGGTTTACAGAAGATTAATTCTATATTTTTTAATGATCCTTCCGCAGGTTCACCTACGGAAACCTTGTTACGACTTT
>9e55309c50e0e734e015dd8f565a464c
GCCAGAACCAAGAGATCCGTTGTTGAAAGTTTTAACGATTATATGGGACTTAGACGGCACAGAAAACAGGAGTTGGGGCCTCTGGTCGGCGCGTACCAGCAGAGCCGGTAGCGGGCGGGCCCGCGGCCGACCAAAGCAACAAAGGTATCGTTCACACGGGTGGGAGGTCTACCCCGAGGGGCACGAACTCTGTAATGATCCCTCCGCAGGTTCACCTACGGAGACCTTGTTACGACTTTTAC
>2c83e99ff43ebe04d83d57cfc798627c
GAGAGCCAAGAGATCCGTTGTTGAAAGTTTTTTTATATTTCGATATTTCGTTACATACTTGTACTAGTGTTTAAAATGAGCCGTCGTTCATTGCTTCGATTACAAAAGTAACTTCAGCGCCAAACGACCAAATAGTTCACAGAGTTAGAAAGTGGAGGGTCGCGCTCTGTTAAGAGAAACGCTAAATTCACTAATGATCCTTCCGCAGGTTCACCTACGGAAACCTTGTTACGACTTTT
>98ae1324a1791c1476ff55a84a7a8f05
GCAAGAGCCAAGAGATCCATTGTTAAAAGTTGTCATTTTGATTGTGTCAACTGATACTGTCAAACTAAAAAAGCGTCTATGTGGATCCAGGCCATGCAGAGAAAACTCTCCATAACTCTTCACCGCAGGACCCGAAGGCCCTACACCTCGCCTGGCATTGCTGCACAGGTTCGGGTTTATGTGGGCAACACCAGATTGCTCCAGTGTGCTACCATGATTTGTTAATGATCCTTCCGCAGGTTCACCTACGGAAACCTTGTTACGACTTTTAC
>6c547b25485eac2cdc41e43a5f7aaebf
AGAGCCAAGAGATCCGTTGTTGAAAGTTTTGATTCATTTGCTATTTCGCCTGGACTCGGAGAGCAATGCCGCTGCGACAGGAGAGTCTGGGGGGTCCTCCGGCGGGCGCCTTGGTCCGGGCCGCCGTGGGCGCCGGGGCGGTCCCGCCGAGGCAACGCGTGTGGTACGGTTCGCACGGGGTTTGGGAGTTGGGGCAACTCGGTAATGATCCCTCCGCTGGTTCACCAACGGAGACCTTGTTACGACTTT
>41323517398d7673c02dee658779c10a
GCGAGAGCCAAGAGATCCGTTGTCAAAAGTTGTTTATATTTTATTATAATTTCAGACAAGTTTTTATGGTTTGTTATAAAGTTTGGCAGCCTATACCAAGGTATAAACTACCAAAAGACAATATAGTGCACAAGAGGTGAATTTGGCTATGAGGACTCCTTTCGGTATCAACTCATAGACCAAGTATCAGTAATGATCCAACCGCAGGTTCACCTACGGTTACCTTGTTACGACTTTTAC
>43d1c1fb1d5eff22cbf9dce7f6eec248
AAAAGTCGTAACAAGGTTTCCGTAGGTGAACCTGCGGAAGGATCATTCATAATAAGTGTTTTATGGCACTTTTTTAAATCCATATCCACCTTGTGTGCAATGTCAGGGTTGGTCTCTTGAAAAAGAGATCAGCCCCAAACATCAACCCAATCTTAACTCTTTGTCTGAAAAATATTATGAATAAAACAATTCAAAATACAACTTTCAACAACGGATCTCTTGGCTCTC
>c8338793240ae597361574c6c8d73f4e
CGAGAGCCAAGAGATCCGTTGTTGAAAGTTTTTTTTTGTTTTTTATTTCATTACATACTTTGACTAATGTTTAAAATGAAGCCGCAAGGTAGTTTCACTCGAAAGTTCCATTACCTCGCCATCAAGTGCACAGTGTTAGAAGTGGAGGTCAGGCTCTACAAGTAGACGCCCTATAATTCACTAATGATCCTTCCGCAGGTTCACCTACGGAAACCTTGTTACGACTTTTA
>8ddc16cb9588e471f7a3b551816f8940
GCCGGAACCAAGAGATCCGTTGTTGAAAGTTTTAAATAATTTATATTTTCACTCAGACTACAATCTTCAGACAGAGTTCGAGGGTGTCTTCGGCGGGCGCGGGCCCGGGGGCGTAAGCCCCCCGGCGGCCAGTTAAGGCGGGCCCGCCGAAGCAACAAGGTAAAATAAACACGGGTGGGAGGTTGGACCCAGAGGGCCCTCACTCGGTAATGATCCTTCCGCAGGTTCACCTACGGAAACCTTGTTACGACTTTTAC
>36214eb4593605097356e49b0ddf3fc9
AAAGTCGTAACAAGGTCTCCGTTGGTGAACCAGCGGAGGGATCATTACCGAGTTGCCCCAACTCCCAAACCCCGTGCGAACCGTACCACACGCGTTGCCTCGGCGGGACCGCCCCGGCGCCCACGGCGGCCCGGACCAAGGCGCCCGCCGGAGGACCCCCCAGACTCTCCTGTCGCAGCGGCATTGCTCTCCGAGTCCAGGCGAAATAGCAAATGAATCAAAACTTTCAACAACGGATCTCTTGGCTCT
>2f873ef17e6aa4d41c09aef592909839
TAAAAGTCGTAACAAGGTCTCCGTTGGTGAACCAGCGGAGGGATCATTATCGAGTTTATCCAACTCCCAACCCTATGTGAACCTACCTTTATGTTGCTTCGGCGGTCTCGCGCCGGGTTGCTCCCCTGGGGGGCTCCCGGGACTACGCGTCCGCCGGAGACCACAAACTCTTGATTTTGCGAAAGCAGTATTATTCTGAGTGGCCGAAAGGCAAAAAACAAATGAATCAAAACTTTCAACAACGGATCTCTTGGTTCTGG
>a7f2bb55657fd0052c9af23a05494270
AGAACCAAGAGATCCGTTGTTGAAAGTTTTAATTTATTTGCTTGTGTTACTCAGAAGATTCTCATGAAGACAAGAGTTTGGGTCCTCCGGCGGGCGCCTGGGTCCGGGCCCGAGGGCGCCGGGGCGATCCCGCCGAAGCAACAATAGGTATGTTCACAGGGGTTTGGGAGTTGTAAACTCGGTAATGATCCCTCCGCTGGTTCACCAACGGAGACCTTGTTACGACTTT
>eb49871d14356d09bd24d9f963f379a7
CAAGAGCCAAGAGATCCATTGTTAAAAGTTGTCATTTTAGTTTTACAACTGTAACTCTGTCAAACATACAATCGTCTATGTGGCTGGCAAGGACTTGCGCCCTCACACAACCGGAGCAGGACTTGCATCCCACCCAACCAAAGCCGGCATTGCTGCCAGGCTCGGGGTAAATATATGCGTCAAGCCCGAAGGCTCGGCCGCATAGCAGATTTGTTAATGATCCTTCCGCAGGTTCACCTACGGAAACCTTGTTACGACTTTTA
>782959d273d54108ab4b1a3d914048e7
GCCAGAACCAAGAGATCCGTTGTTGAAAGTTTTATATTGCGATTACGTTTTTAGGACGTTCTCTATAGTCAAGATTTTAGAGAAAAGGTAAGCCATCCGTCCATAGGGTCGGCAGCGAGCGGAGGGGATGAGTCCAACCTCCTCCCGCTTAAGCGTCCGTCGGATCGGGGGCAGGGTAGGATAGACACGGATGGGAGATGGGGCCCGGTGGGACCCTCACTCGTTAATGATCCTTCCGCAGGTTCACCTACGGAAACCTTGTTACGACTTTTAC
>327f95a2aaed42bdba5d690be4386165
TAAAAGTCGTAACAAGGTTTCCGTAGGTGAACCTGCGGAAGGATCATTGTCGTGACCCTGACCAAAATAGACCGTGCACGCGTTATCCAACCTGTCGGCGGCGGCACCGTCCGTTGCTCGGCCAAGTCCTCGACAACCTCCTCTTCTTTGAGTGGGGGCTCGGGGTAAAAGAACCCACGGCGCCTAAGGCGTCAAGGAACACTGTGCCTAACTCGGGGACGCGGCTGGCTTGCTGGCCGCCCCTCGTGTTGCAATGCTATTTAATCCACATGACTCTCGGCAACGGATATCTCGGCTCTCG
>d5b933eb295f5db5251b9fa30450456f
GTAAAAGTCGTAACAAGGTTTCCGTAGGTGAACCTGCGGAAGGATCATTACAGTAGTCACCCGGGGCGCCGCAAGGCCTCCCGGGTAACCTACCACCCTTTGTTTATTACACTTTGTTGCTTTGGCAGGCCTGCCCTCGGGCTGCTGGCTCCGGCCGGCGAGCGCTTGCCAGAGGACCTAAACTCTGTTTGTCTATACTGTCTGAGTACTATATAATAGTTAAAACTTTCAACAACGGATCTCTTGGTTCTGGC
>aacecc26c1d03a9c602a764660c7fb6d
AAAAGTCGTAACAAGGTTTCCGTAGGTGAACCTGCGGAAGGATCATTAGTGAATTTAGCGTTTCTCTTAACAGAGCGCGACCCTCCACTTTCTAACTCTGTGAACTATTTGGTCGTTTGGCGCTGAAGTTACTTTTGTAATCGAAGCAATGAACGACGGCTCATTTTAAACACTAGTACAAGTATGTAACGAAATATCGAAATATAAAAAAACTTTCAACAACGGATCTCTTGGCTCTC
>6e6c6353ed891853808c41403afa8402
AAAAGTCGTAACAAGGTTTCCGTAGGTGAACCTGCGGAAGGATCATTAAAAATGAAGCCGGGAAACCGGTCCTTCTAACCCTTGATTATCTCAATTTGTTGCTTTGGTGGGCCGCGCAAGCACCGGCTTCGGCTGGATCGTGCCCGCCAGAGGACCACAACTCTGTATTAAATGTCGTCTGAGTACTAAAAAATAGTTAAAACTTTCAACAACGGATCTCTTGGTTCTG
>166219a9cdf4c959b54150336e08d670
AGAACCAAGAGATCCGTTGTTGAAAGTTTTAATATTTATTATTAACTGAAGTTACTGCTACTACAAAGGGTTTTTAATGTCCTGATGGCGGGCAAGCCCGCCGAGGAAACAAGGGTACTCATAAACAAAGGGTGCTATCTCAATGGGGCCGAAGCCCCACGGTAATGATCCTTCCGCAGGTTCACCTACGGAAACCTTGTTACGACTTT
>601b484c49cb80c695543bfc41800938
GCCAGAACCAAGAGATCCGTTGTTGAAAGTTTTAACTATTATATAGTACTCAGACAGTATAGACAAACAGAGTTTAGGTCCTCTGGCAAGCGCTCGCCGGCCGGAGCCAGCAGCCCGAGGGCAGGCCTGCCAAAGCAACAAAGTGTAATAAACAAAGGGTGGTAGGTTACCCGGGAGGCCTTGCGGCGCCCCGGGTGACTACTGTAATGATCCTTCCGCAGGTTCACCTACGGAAACCTTGTTACGACTTTTAC
>46bdd68bea36f624bd6aa6fa34ca3e3d
GTAAAAGTCGTAACAAGGTTTCCGTAGGTGAACCTGCGGAAGGATCATTACTAGAGCAAAGGATAGGCAGCGCCCCACCGAAGCTTGCTTCGTGGGGTGTCGAGCCGTCGACCCTCTCGGAGAAGGTCGGTCCTGAACTCCACCCTTGAATAAATTACCTTTGTTGCTTTGGCGGGCCGCCTCGCGCCAGCGGCTTCGGCTGTTGAGTGCCCGCCAGAGGACCACAACTCTTGTTTTTAGTGATGTCTGAGTACTATATAATAGTTAAAACTTTCAACAACGGATCTCTTGGTTCTGGC
>c17efeffbce57ccb3f8a2d5cd81a39ae
CAGAACCAAGAGATCCGTTGTTGAAAGTTTTAATATTTATTATTAACTGAAGTTACTGCTACTACAAAGGGTTTTTGATGTCCTCATGGCGGGCAAGCCCGCCGAGGAAACAAGGGTACTCATAAACAAAGGGTGCTATCTCAATGGGGCCGAAACCCCACGGTAATGATCCTTCCGCAGGTTCACCTACGGAAACCTTGTTACGACTTTT
>7398def1c98d51b6a18de8ddeac99efc
GCGAGAGCCAAGAGATCCGTTGTTGAAAGTTGTATTTTGAATTGTTTTATTCATAATATTTTTCAGACAAAGAGTTAAGATTGGGTTGATGTTTGGGGCTGATCTCTTTTTCAAGAGACCAACCCTGACATTGCACACAAGGTGGATATGGATTTAAAAAAGTGCCATAAAACACTTATTATGAATGATCCTTCCGCAGGTTCACCTACGGAAACCTTGTTACGACTTTTAC
>0fa478571d4e80bb3e65b99c3aa4c24c
GAGAGCCAAGAGATCCGTTGTTGAAAGTTTTTTTATATTTCGATATTTCGTTACATACTTGTACTAGTGTTTAAAATGAGCCGTCGTTCATTGCTTCGATTACAAAAGTAACTTCAGCGCCAAACGACCAAATAGTTCACAGAGTTAGAAAGTGGAGGGTCGCGCTCTGTTAAGAGAAACGCTAAATTCACTAATGATCCTTCCGCAGGTTCACCTACGGAAACCTTGTTACGACTCGT
>912af0832e0e390c32b9ecb7fd6f3399
TAAAAGTCGTAACAAGGTAACCGTAGGTGAACCTGCGGTTGGATCATTAATGAATTTCATTGATAGCCCTCTGTGCGCCGAGTGTCAAAGCTTGGTGCATGTTGGGTGTTTGGGAGCAACCCTTCAAGGAAGCTCCCTCACAAACCCCTGTCTTTTATTCAGTGAGACGTGGTAGCAAGGCAACTTGCCGCCAGGACTCGCTGCTTATTAAACTCATTCCATACCAGTCTTATACCATAAAGAAATTAATCTTTAAACAACTTTTGACAACGGATCTCTTGGTTCTCG
>bf3aad95c64904df18f288867e49714d
CCAGAACCAAGAGATCCGTTGTTGAAAGTTTTAACTATTATATAGTACTCAGACAGTATAGACAAACAGAGTTTAGGTCCTCTGGCAAGCGCTCGCCGGCCGGAGCCAGCAGCCCGAGGGCAGGCCTGCCAAAGCAACAAAGTGTAATAAACAAAGGGTGGTAGGTTACCCGGGAGGCCTTGCGGCGCCCCGGGTGACTACTGTAATGATCCTTCCGCAGGTTCACCTACGGAAACCTTGTTACGACTTTTA
>e0565626783951371421279a63e221df
TAAAAGTCGTAACAAGGTTTCCGTAGGTGAACCTGCGGAAGGATCATTACAGTAGTCACCCGGGGCGCCGCAAGGCCTCCCGGGTAACCTACCACCCTTTGTTTATTACACTTTGTTGCTTTGGCAGGCCTGCCCTCGGGCTGCTGGCTCCGGCCGGCGAGCGCTTGCCAGAGGACCTAAACTCTGTTTGTCTATACTGTCTGAGTACTATATAATAGTTAAAACTTTCAACAACGGATCTCTTGGTTCTGG
>8b385812078c88e4dc755a93f5e8bb0e
GATGCGAGAGCCAAGAGATCCGTTGTCAAAAGTTGTTTATTATTTAAAATAAAATCAGACATATAGTAGTAGATAGGTTCACCATCCGAAGACAGCTTACCAAAAATGATGCACAGGTGGTTTAGACTCTTGCGAGTCAGGATTTGTAATGATCCAACCGCAGGTTCACCTACGGTTACCTTGTTACGACTTTTACTTCCTCTAAATGA
>e2729d983705ba6df4cca0557c4e7a34
AAGAGCCTAGAGATCCATTGTTATAAGTTGTACAAGTTTTCAAGTCTTAGCCTCCGTTAGGATGCAGACAGGATACATTTGAGCAACAAGGAAACACTAGTTTAACAGCCTAGCCAGGCGCGCACCCGAAGGGGCACGTCTGACTAGGGAACATTTCAACGTGGTCTCAAGCGTGTTGAGACGTGGATGGATTTGTAATGATCCTTCCGCAGGTTCACCTACGGAAACCTTGTTACGACTTGT
>b56d6acff5359f227df5d78341b8b62b
CCAGAGCCAAGAGATCCGTTGTTGAAAGTTTTGATTTATTTAATAATCCACTCAGACGATACAAAAGTAAGACAAGAGTTTGTTTCCCCCGGCGGGCGCCTGGTTCCGGGGCACGCTTGCGCGCGCCCGGGGCGTACCCGCCGAAGCAACGGTGGTATGTTCACAGGGGTTTGGGAGTTGTTAAGCTCTGTAATGATCCCTCCGCTGGTTCACCAACGGAGACCTTGTTACGACTTTTA
>a4ab7ceae25061b46f822c20fc6b135b
AGAGCCGAGATATCCGTTGCCGAGAGTCGTGTGGATTAAATAGCATTGCAACACGAGGGGCGGCCAGCAAGCCGGCCGCGTCCCCGAGTTAGGCACAGTGTTCCTTGACGCCTTAGGCGCCGTGGGTTCTTTTACCTCGAGCCCCCACTCCGAGAAGAGGAGGTTGTCAAGGACTTGGCCGAGCAACGGACGATGCCGCCGCCGGCAGGTTGGATTACGCGTGCGCGGTCTATTTTGGTCAGGGTCACGACAATGATCCTTCCGCAGGTTCACCTACGGAAACCTTGTTACGACTTT
>0a604e3bce57eb5c78a4745cd2bc9478
GTAAAAGTCGTAACAAGGTCTCCGTAGGTGAACCTGCGGAGGGATCATTACAAGTGACCCCGGTCTAACCACCGGGATGTTCATAACCCTTTGTTGTCCGACTCTGTTGCCTCCGGGGCGACCCTGCCTTCGGGCGGGGGCTCCGGGTGGACACTTCAAACTCTTGCGTAACTTTGCAGTCTGAGTAAACTTAATTAATAAATTAAAACTTTTAACAACGGATCTCTTGGTTCTGGC
>32669bdaa7ea4dda4571030a62fd4fb0
AAAAGTCGTAACAAGGTTTCCGTAGGTGAACCTGCGGAAGGATCATTAACGAGTGAGGGTCCCACCGGGCCCCATCTCCCATCCGTGTCTATCCTACCCTGCCCCCGATCCGACGGACGCTTAAGCGGGAGGAGGTTGGACTCATCCCCTCCGCTCGCTGCCGACCCTATGGACGGATGGCTTACCTTTTCTCTAAAATCTTGACTATAGAGAACGTCCTAAAAACGTAATCGCAATATAAAACTTTCAACAACGGATCTCTTGGTTCTG
>ec54358bbb64ac373fae0db36d0e6ca7
GTAAAAGTCGTAACAAGGTTTCCGTAGGTGAACCTGCGGAAGGATCATTACAGTAGTCATCCGGGATGCCGCAAGGCCTCCCGGGTAACCTACCACCCTTTGTTTATTACACTTTGTTGCTTTGGCAGGCCTGCCCTCGGGCTGCTGGCTCCGGCCGGCGAGCGCTTGCCAGAGGACCTAAACTCTGTTTGTCTATACTGTCTGAGTACTATATAATAGTTAAAACTTTCAACAACGGATCTCTTGGTTCTGGC
>07443e4f42f3a63cb5d21f14f2ee97d9
AAAAGTCGTAACAAGGTTTCCGTAGGTGAACCTGCGGAAGGATCATTAACACGTATCCACGTATACACCCACGCGCGACTGTCCCGGATAGCTTGCTTCGAGTTGCGGCGCGAGCCTCTTCTTGTCCCTGCTACATATTTTTATACAACAAACACGCCAAACAACCCCCCAAACAAAAACCTTCTCAACTTTTGAAGCTAATTAATTTATTCCATGTGCTGTTTCGAAACCCTTTTTGGGGGCGGAGAAACGCATATCGATATTCTATACGAAACGCTGAACAACTCTTAGCAATGGATATCTTGGTTCTC
>1b8f8a035dc55ab3b3a3c382b4de4eb8
GCCAGAACCAAGAGATCCGTTGTTAAAAGTTTTAATTTATTAATTAAGTTTACTCAGACTGCAAAGTTACGCAAGAGTTTGAAGTGTCCACCCGGAGCCCCCGCCCGAAGGCAGGGTCGCCCCGGAGGCAACAGAGTCGGACAACAAAGGGTTATGAACATCCCGGTGGTTAGACCGGGGTCACTTGTAATGATCCCTCCGCAGGTTCACCTACGGAGACCTTGTTACGACTTTTAC
>80352adb22961e1d18cf537b20078a4a
AAAAGTCGTAACAAGGTTTCCGTAGGTGAACCTGCGGAAGGATCATTACCGTGGGGTTTCGGCCCCATTGAGATAGCACCCTTTGTTTATGAGTACCCTTGTTTCCTCGGCGGGCTTGCCCGCCATGAGGACATCAAAAACCCTTTGTAGTAGCAGTAACTTCAGTTAATAATAAATATTAAAACTTTCAACAACGGATCTCTTGGTTCTG
>036da5072f9d82d70b238c44486dd672
AAGTAAAAGTCGTAACAAGGTAACCGTAGGTGAACCTGCGGTTGGATCATTACCAATTGACGAAAGTCTATAAACCTGTGCATCAATGCTGTTTCTGGAGCGCGTCTCGGCGTGCTCCAAACTACCAAATCTAATATACGTCTTTATAAAGTGAAAGCTAAACAACTTTTGACAACGGATCTCTTGGCTCTCGCATCGATGAAGAA
>a6019f36132175687f686a59bd5237f3
GAAGTAAAAGTCGTAACAAGGTAACCGTAGGTGAACCTGCGGTTGGATCATTACAAATCCTGACTCGCAAGAGTCTAAACCACCTGTGCATCATTTTTGGTAAGCTGTCTTCGGATGGTGAACCTATCTACTACTATATGTCTGATTTTATTTTAAATAATAAACAACTTTTGACAACGGATCTCTTGGCTCTCGCATCGATGAAGAAC
>a4e9c4ba489155880add4fad7ca082c5
GCCAGAACCAAGAGATCCGTTGTTGAAAGTTTTAACTATTATATAGTACTCAGACGACACTAATAATTCAGAATTTGGGGTTCTCTGGCGAGCACTCACCAGCGTGAGCCGGTGGCCGAGGCGGCTCGCCAAAGCAACAAAGGTACAATAACACAGGGTTGGAGAGTCACCCGCGAGGGCGATATTCTCTGTAATGATCCTTCCGCAGGTTCACCTACGGAAACCTTGTTACGACTTTTAC
>9dd7a374644b6306c93d51224f12677d
TAAAAGTCGTAACAAGGTTTCCGTAGGTGAACCTGCGGAAGGATCATTAAAAATGAAGCCGGGAAACCGGTCCTTCTAACCCTTGATTATCATAATTTGTTGCTTTGGTGGGCCGCGCAAGCACTGGCTCCGGCTGGTTAGTGCCCACCAGAGAACCACAACTCTGTAATAAATGTCGTCTGAGTACTATATAATAGTTAAAACTTTCAACAACGGATCTCTTGGTTCTGG
>01aaa55d4a1fce462d2f60bdf916e04a
AAAGTCGTAACAAGGTTTCCGTAGGTGAACCTGCGGAAGGATCATTACAAATTAGTTGTGGATTTTGGGTGGTGTAAAGTGTGATTTGTGACGTGAAGTGTGAAGTGTGGTATTTCGATATTACATTACACACATCATTACATACATTAATTACATTACTTGCACTACTCATTATCCATTATAGCCCACTCCTGAAAGGGAGATGGACGCGCTAGTGCTAGTTCGCTGGCGCAAATAGACCTTAAATCATGACTTATTCCAAAAAGAAAATAACCAAAACTTTTAACAATGGATCTCTTGGCTCT
>efac1a88312f1842e72b0210bbe7d65c
AAAAGTCGTAACAAGGTTTCCGTAGGTGAACCTGCGGAAGGATCATTAGTGAATTATAGGGCGTCGTTCACTTCGGTGACGAGCCTGACCTCCACTTTCTAACTCTGTGCATTTTATTGGTGAGCAACGAACGACCCCGGCTTCGGCCGGGCGAGTGAAGTGCTTACGGCTCATTTTAAACACCAGTCAAAGTATGTAACGAAATATCGAAATAAAAAAAAACTTTCAACAACGGATCTCTTGGCTCTC
>caceada310edb8dae0e8d28a7e5437b3
CGAGAGCCGAGATATCCGTTGCCGAGAGTCATGTGGATTAAATAGCATTGCAACACGAGGGGCGGCCAGCAAGCCAGCCGCGTCCCCGAGTTAGGCACAGTGTTCCTTGACGCCTTAGGCGCCGTGGGTTCTTTTACCCCGAGCCCCCACTCAAAGAAGAGGAGGTTGTCGAGGACTTGGCCGAGCAACGGACGGTGCCGCCGCCGACAGGTTGGATAACGCGTGCACGGTCTATTTTGGTCAGGGTCACGACAATGATCCTTCCGCAGGTTCACCTACGGAAACCTTGTTACGACTTTTA
>42440fc9e3cc43dcea2a268b6ccc27d0
AAAGTCGTAACAAGGTTTCCGTAGGTGAACCTGCGGAAGGATCATTACCGTGGGGCTTCGGCCCCATTGAGATAGCACCCTTTGTTTATGAGTACCCTTGTTTCCTCGGCGGGCTTGCCCGCCATCAGGACATTAAAAACCCTTTGTAGTAGCAGTAACTTCAGTTAATAATAAATATTAAAACTTTCAACAACGGATCTCTTGGTTCT
>edde2eaed8f7dcc8270080a12a2e44a9
GCCAGAACCAAGAGATCCGTTGTTGAAAGTTTTAACTATTATATAGTACTCAGACAGTATAGACAAACAGAGTTTAGGTCCTCTGGCAAGCGCTCGCCGGCCGGAGCCAGCAGCCCGAGGGCAGGCCTGCCAAAGCAACAAAGTGTAATAAACAAAGGGTGGTAGGTTACCCGGGAGGCCTTGCGGCATCCCGGATGACTACTGTAATGATCCTTCCGCAGGTTCACCTACGGAAACCTTGTTACGACTTTTAC
>239ccc889f29c51650c2f92825dafad1
AAAGTCGTAACAAGGTTTCCGTAGGTGAACCTGCGGAAGGATCATTGTCGTGACCCTGACCAAAATAGACCGCGCACGCGTAATCCAACCTGCCGGCGGCGGCATCGTCCGTTGCTCGGCCAAGTCCTTGACAACCTCCTCTTCTCGGAGTGGGGGCTCGAGGTAAAAGAACCCACGGCGCCTAAGGCGTCAAGGAACACTGTGCCTAACTCGGGGACGCGGCCGGCTTGCTGGCCGCCCCTCGTGTTGCAATGCTATTTAATCCACACGACTCTCGGCAACGGATATCTCGGCTCT
>4f9377d85464939c373f31cdb2eab665
CAGAACCAAGAGATCCGTTGTTGAAAGTTTTAACTATTATATAGTACTCAGACAGTATAGACAAACAGAGTTTAGGTCCTCTGGCAAGCGCTCGCCGGCCGGAGCCAGCAGCCCGAGGGCAGGCTTGCCAAAGCAACAAAGTGTAATAAACAAAGGGTGGTAGGTTACCCGGGAGGCCTTGCGGCGTCCCGGGTGACTACTGTAATGATCCTTCCGCAGGTTCACCTACGGAAACCTTGTTACGACTTTT
>f08ed28ac089ae7bc4b01064dab97cbc
GAGAGCCAAGAGATCCGTTGTTGAAAGTTTTTTTTTATTTCGATATTTCGTTACATACTTTGACTGGTGTTTAAAATGAGCCGTAAGCACTTCACTCGCCCGGCCGAAGCCGGGGTCGTTCGTTGCTCACCAATAAAATGCACAGAGTTAGAAAGTGGAGGTCAGGCTCGTCACCGAAGTGAACGACGCCCTATAATTCACTAATGATCCTTCCGCAGGTTCACCTACGGAAACCTTGTTACGACTTTT
>aab49fc3e71b0b8c5ec8153487db5f10
GAGAGCCAAGAGATCCGTTGTTGAAAGTTGTATTTTGAATTGTTTTATTCATAATATTTTTCAGACAAAGAGTTAAGATTGGGTTGATGTTTGGGGCTGATCTCTTTTTCAAGAGACCAACCCTGACATTGCACACAAGGTGGATATGGATTTAAAAAAGTGCCATAAAACACTTATTATGAATGATCCTTCCGCAGGTTCACCTACGGAAACCTTGTTACGACTTTT
>eb2f5449d076662cb3a58875b974f1f5
GCCAGAACCAAGAGATCCGTTGTTGAAAGTTTTAACTATTATATAGTACTCAGACATCACTAAAAACAAGAGTTGTGGTCCTCTGGCGGGCACTCAACAGCCGAAGCCGCTGGCGCGAGGCGGCCCGCCAAAGCAACAAAGGTAATTTATTCAAGGGTGGAGTTCAGGACCGACCTTCTCCGAGAGGGTCGACGGCTCGACACCCCACGAAGCAAGCTTCGGTGGGGCGCTGCCTATCCTTTGCTCTAGTAATGATCCTTCCGCAGGTTCACCTACGGAAACCTTGTTACGACTTTTAC
>f071e3c485107639e44d287c6f81dada
TAAAAGTCGTAACAAGGTTTCCGTAGGTGAACCTGCGGAAGGATCATTGCACACACAAGTTGCAGCCAACCCGCGGCGAACGAACACATTGTCCCCCTCGGTGGGTCGTGGCGCCTCGCGGCGTCGCGGCCTGCCGTCTCCCTTCGTCACGAGGTCGTGACCTCGCGGCGTCGGGTCTCCACGATGCGTCCACCTTGACCTAATGACTGAGTCCCTTTTACTCAATGGGAGTGAGCTCCGCGCCCCGCTTGGCTTCGCTGAGTGGGCCGGCGCTGGTTACCTTGCGAGTTGAAACATAACCAAAAACAACTCTCAGCAACGGATATCTTGGCTCTTG
>0170af7cffe4cb2bcf9e5a2662c0bd09
GAGAACCAAGATATCCATTGCTAAGAGTTGTTCAGCGTTTCGTATAGAATATCGATATGCGTTTCTCCGCCCCCAAAAAGGGTTTCGAAACAGCACATGGAATAAATTAATTAGCTTCAAAAGTTGAGAAGGTTTTTGTTTGGGGGGTTGTTTGGCGTGTTTGTTGTATAAAAATATGTAGCAGGGACAAGAAGAGGCTCGCGCCGCAACTCGAAGCAAGCTATCCGGGACAGTCGCGCGTGGGTGTATACGTGGATACGTGTTAATGATCCTTCCGCAGGTTCACCTACGGAAACCTTGTTACGACTTTT
>9d3263e87bcccd5d8655426b9dcbe1ec
AAAGTCGTAACAAGGTTTCCGTAGGTGAACCTGCGGAAGGATCATTAGTGAATTATAGGGCGTCTACTTGTAGAGCCTGACCTCCACTTCTAACACTGTGCACTTGATGGCGAGGTAATGGAACTTTCGAGTGAAACTACCTTGCGGCTTCATTTTAAACATTAGTCAAAGTATGTCATGAAATAAAAAACAAAAAAAAACTTTCAACAACGGATCTCTTGGCTCT
>839da88f042e32ad6bf179781dc3e653
AGAGCCAAGAGATCCATTGTTAAAAGTTTTGGTTATTTTCTTTTTGGAATAAGTCATGATTTAAGGTCTATTTGCGCCAGCGAACTAGCACTAGCGCGTCCATCTCCCTTTCAGGAGTGGGCTATAATGGATAATGAGTAGTGCAAGTAATGTAATTAATGTATGTAATGATGTGTGTAATGTAATATCGAAATACCACACTTCACACTTCACGTCACAAATCACACTTTACACCACCCAAAATCCACAACTAATTTGTAATGATCCTTCCGCAGGTTCACCTACGGAAACCTTGTTACGACTTT
>85a7e49c75715cc3a4998b47020a08fa
AAAAGTCGTAACAAGGTCTCCGTTGGTGAACCAGCGGAGGGATCATTATCGAGTTTATCAACTCCCAACCCTATGTGAACCTACCTTTATGTTGCTTCGGCGGTGTCGCGCCGGGTTGCCCCCAGCGGGCTCCCGGGACCACGCGCCCGCCGGAGACCACAAACTCTTGATTTTGCGAAAGCAGTATTCTTCTGAGTGGCCGAAAGGCAAAAAACAAATGAATCAAAACTTTCAACAACGGATCTCTTGGTTCTG
>e6a027fdf58d12323bc93a42a5654682
CAAGAGCCAAGAGATCCATTGTTAAAAGTTGTCTTTTTAGTTTACAACTGTAACTCTGTCAAACATACAAGCGTCTATGTGGCCAGGCACAAGAATCCAAAGATCCTCACACACTGTCCTAGGTGCACCCAGTCCGAAGACCAGGCACACCTAACCAAAGCTGGCTTTTACACCAGCTCGGGGTAAATATACATGTGCGTTCCCTTGCGGGGCGCCATGTAGCAGATTTGTTAATGATCCTTCCGCAGGTTCACCTACGGAAACCTTGTTACGACTTTTA
>4f05433a5e66b9ef767f237356a6d614
GTAAAAGTCGTAACAAGGTTTCCGTAGGTGAACCTGCGGAAGGATCATTAACAGATTCTGCTAGTCAGATATCTAACCCCGTGTGAACTGTTCTTTTGACTTGGTGTCTGAGCACTAGATTCTTCAAGACCTTCTTGTCGAATTTACGTCTGGGCACCATACGTTTTTACCCTTTGACTTTGAATGCCGAGTAAACTACAAAAGACTAGAAAACTTTTAGCAACGGATCTCTAGGCTCTTGC
>da64f46c09166f9683117efb1fb445d3
AAAAGTCGTAACAAGGTTTCCGTAGGTGAACCTGCGGAAGGATCATTACAGTAGTCACCCGGGACGCCGCAAGGCCTCCCGGGTAACCTACCACCCTTTGTTTATTACACTTTGTTGCTTTGGCAAGCCTGCCCTCGGGCTGCTGGCTCCGGCCGGCGAGCGCTTGCCAGAGGACCTAAACTCTGTTTGTCTATACTGTCTGAGTACTATATAATAGTTAAAACTTTCAACAACGGATCTCTTGGTTCTG
>5f24669b2bb9cc35df39df4dca096dfc
TAAAAGTCGTAACAAGGTTTCCGTAGGTGAACCTGCGGAAGGATCATTAACACGAATCCACGTATCAACCCCTCTGTGCACTAGTTACCGTTACCGAGGTTAACACCTCGGTGCCCCCCTTTTCCGCTTCTCTCACCTACCCTCGGGTAGGGTGGAGTGGTTGGGCTGGAACTTTACTGTTCCCTCCCTTCCTCACCGCGAGAAGTTGGAAATTTTTTACTTTATAAACCCCTTTGTACTCTTTTGTACTGAACCAAAACTTTGTGTTCTTTCTTTACTGAAAGATAACGAAGAAAATACGAAACTAAGAACAACTCTTAACAACGGATCTCTTGGTTCCCG
>b8a6fcce543358a867826399d3e8d3be
AAAGTCGTAACAAGGTTTCCGTAGGTGAACCTGCGGAAGGATCATTAGTGAATTATAGGGCGTCTACTTGTAGAGCCTGACCTCCACTTCTAACACTGTGCACTTGATGGCGAGGTAATGGAACTTTCGAGTGAAATTACCTTGCGGCTTCATTTTAAACATTAGTCAAAGTATGTAATGAAATATTAAAACAAAAAAAAACTTTCAACAACGGATCTCTTGGCTCT
>59fba38b08b53b59163cdacffc9f3000
AAAAGTCGTAACAAGGTTTCCGTAGGTGAACCTGCGGAAGGATCATTAACAAATCATCATAGTCGTGCGCTTCGGCGCACCGCTATATACACCCCAAGCCTGGGAAGAGCAGCAATGCTTGGAACGGCTTTGGTTGCAGCCTTCGGGCTGTAGGCTAGGGCGCCGCAAGGCAAACTAGCCACATAGACGCTTGCTTAGTTTGACAGAGTTTAGTTGACATTTAAAAAATACAACTTTTAACAATGGATCTCTTGGCTCTT
>cf3aa7dd7781c1bcea63adf192cab631
GTAAAAGTCGTAACAAGGTTTCCGTAGGTGAACCTGCGGAAGGATCATTAACACTAATCCAATCAACTCAACGAAGCCTTTAGTTGCAGCAGTGGTAACATTGCTGTAGCACATTTCAAAACTAATTCAACCAAAGAATTCTAATTAAGATCCATTACAAAAACCAAATTCTCAACGGTGGATGTCTTGGTTCCCGCATCGATGAAG
>d8092b03f4dfcd9fdff668bd29223aae
CGAGCCAAGAGATCCACCGTTTAAAGTTGTCATTAAGTTGTTATGTTTAACTGGAGACATCTTGCGATGCTGCCAGACCAAACGACTAACGTTCATTCGGTCAGAACTGACTTGGTTCACAATGGGTTAAAATATAAATCATGGAAGCAAGCAAGCTTACTTTGGTCCACAATTCAATATATATAAAGGGTTGGTTCACACAAATGGGTCGATATAGAATCGTTTGTGAATGATCCTTCCGCAGGTTCACCTACGGAAACCTTGTTACGACTTT
>728ce13943d97d108bbefb07fc53cded
GTAAAAGTTGTAACAAGGTTTCCGTAGGTGAACCTGCGGAAGGATCATTAACAAATCCTGCTGCAGTGCCGCAAGGCGCTGTAGTATATTAACTCGGCCTGTGTCGCAAGATGCAGGCTGAATATAAATGTGTGTAATGTAGACAATGTGTGTGTGATAATTAGTAGACAACTTTTAACAATGGATCTCTAGGCTCTTGCATCG
>9cd3cd00b8b35b7cdad9560488f1648b
CGAGAGCCAAGAGATCCGTTGTTGAAAGTTGTATTTAGAATTATATATTCGAAATAGCTTCAGACAAAAAATTTACAATAAAGGTTGGTATTGTGCTATCAAGACGAATAAACGACTTGACAGCAAACATTGCACACAAGGTGAGTACTTGTTTAAAAAGTGCAGTAGAACACTTATTATGAATGATCCTTCCGCAGGTTCACCTACGGAAACCTTGTTACGACTTTTA
>12f9d2bfb19dd1266881aefb4c2887af
AAGAGCCAAGAGATCCATTGTTAAAAGTTGTATTTTTTAAATGTCAACTAAACTCTGTCAAACTAAGCAAGCGTCTATGTGGCTAGTTTGCCTTGCGGCGCCCTAGCCTACAGCCCGAAGGCTGCAACCAAAGCCGTTCCAAGCATTGCTGCTCTTCCCAGGCTTGGGGTGTATATAGCGGTGCGCCGAAGCGCACGACTATGATGATTTGTTAATGATCCTTCCGCAGGTTCACCTACGGAAACCTTGTTACGACTTTT
>a3c3d7c72deedeacf1e3649ef15ca3f6
TAAAAGTCGTAACAAGGTTTCCGTAGGTGAACCTGCGGAAGGATCATTAACAAATCTGCTACATGGCGCCCCGCAAGGGAACGCACATGTATATTTACCCCGAGCTGGTGTAAAAGCCAGCTTTGGTTAGGTGTGCCTGGTCTTCGGACTGGGTGCACCTAGGACAGTGTGTGAGGATCTTTGGATTCTTGTGCCTGGCCACATAGACGCTTGTATGTTTGACAGAGTTACAGTTGTAAACTAAAAAGACAACTTTTAACAATGGATCTCTTGGCTCTTG
>81477be9cc5af4cf86389e8c007af687
AGAACCAAGAGATCCGTTGTTGAAAGTTTTAACTATTATATAGTACTCAGACAATATGAACAAACAGAGTTTTAGGTCCTCTGGCGGGCGCTGACCAGCCGAAGCCGGTGGTCCGAGGACGGGCCCGCCAAAGCAACAAAGGTATAATAAACAAAGGGTGGGAGGTATACCCCGAAGGGCAACGTCTCTTTAATGATCCTTCCGCAGGTTCACCTACGGAAACCTTGTTACGACGCT
>dcd33115663f851c2c468e45f51bd73e
CAGAACCAAGAGATCCGTTGTTGAAAGTTTTATATTGCGATTACGTTTTTAGGACGTTCTCTATAGTCAAGATTTTAGAGAAAAGGTAAGCCATCCGTCCATAGGGTCGGCAGCGAGCGGAGGGGATGAGTCCAACCTCCTCCCGCTTAAGCGTCCGTCGGATCGGGGGCAGGGTAGGATAGACACGGATGGGAGATGGGGCCCGGTGGGACCCTCACTCGTTAATGATCCTTCCGCAGGTTCACCTACGGAAACCTTGTTACGACTTTT
>ce04026e53d8d8d6b8890b6313b1a6c2
TAAAAGTCGTAACAAGGTTTCCGTAGGTGAACCTGCGGAAGGATCATTACAGTAGTCATCCGGGATGCCGCAAGGCCTCCCGGGTAACCTACCACCCTTTGTTTATTACACTTTGTTGCTTTGGCAGGCCTGCCCTCGGGCTGCTGGCTCCGGCCGGCGAGCGCTTGCCAGAGGACCTAAACTCTGTTTGTCTATACTGTCTGAGTACTATATAATAGTTAAAACTTTCAACAACGGATCTCTTGGTTCTGG
>3e09b605f493440930d497b0f7d86537
GTAAAAGTCGTAACAAGGTTTCCGTAGGTGAACCTGCGGAAGGATCATTCATAATAAGTGTTTTATGGCACTTTTTAAATCCATATCCACCTTGTGTGCAATGTCGGTTGGTCTTCTTCATGGAGATCGACCAAACATCAACCTAATTTTTAACTCTTTGTCTGAAAAATATTATGAATAAATAATTCAAATACAACTTTCAACAACGGATCTCTTGGCTCTCGC
>20f52a6c4ca1d0e486a64a171b0e78f1
GCGAGAGCCAAGAGATCCGTTGTTGAAAGTTGTATTTGAATTATTTATTCATAATATTTTTCAGACAAAGAGTTAAAAATTAGGTTGATGTTTGGTCGATCTCCATGAAGAAGACCAACCGACATTGCACACAAGGTGGATATGGATTTAAAAAGTGCCATAAAACACTTATTATGAATGATCCTTCCGCAGGTTCACCTACGGAAACCTTGTTACGACTTTTAC
>2957f74c3d9722c274df017e8d9bb2ca
AGAACCAAGAGATCCGTTGTTGAAAGTTTTAATTTATTAATTAAATTTACTCAGACTGCAAAGTTACGCAAGAGTTTGAATGTGTCCACCCGGGGCCCCCGCCAGAAGGCAGGGTCGCCCCGGAGGCAACGTGGTCGGACAACAAAGGGTTATGAGCATCCCGGTGGTTAGACCGGGGTCACTTGTAATGATCCCTCCGCAGGTTCACCTACGGAGACCTTGTTACGACTTT
>42511adb618e8806bfe6dc9c29e22203
AAAGTCGTAACAAGGTTTCCGTAGGTGAACCTGCGGAAGGATCATTAGTGAATTTAAGGGCGTAGACTTCGGTCTGGCCTGAACCCCCACTTTCTAACTCTGTGCATTTATCGGTGGAGGACTTGGACAAGCACGATAACGGACTTCGGTAGAATCCGTATGACATGCGAATCCTTGCTTTCTACGGCTCATTTTAAACACTAGTCAAAGTATGTAACGAAATATCGAAATAAAAAAAAACTTTCAACAACGGATCTCTTGGCTCT
>66bd8b0e3124876871f5fa3c3ffe0856
AAAAGTCGTAACAAGGTTTCCGTAGGTGAACCTGCGGAAGGATCATTAATGAGTTAGGGTCTTCTAGGCCCGATCTCCAACCCTTTGTATAACTACCATGTTGCTTTGGCGGGCCCGTCTTTAACCGGACCGCCGGGGGTCTTTTGACCTCTGGCCAGTGCTCGTCAGTAGCCTACACAAAACTCTTTGAACCATGTTAAATCTGAAACTAGTTAAATAAAACTAAAACTTTCAACAACGGATCTCTTGGTTCTG
>823b5587820d78fa00f0d322b2b36d6a
GTAAAAGTCGTAACAAGGTTTCCGTAGGTGAACCTGCGGAAGGATCATTACCGAGTGTAGGGTTCCTAGCGAGCCCAACCTCCCACCCGTGTTTACTGTACCTTAGTTGCTTCGGCGGGCCCGCCATTCATGGCCGCCGGGGGCTCTCAGCCCCGGGCCCGCGCCCGCCGGAGACACCACGAACTCTGTCTGATCTAGTGAAGTCTGAGTTGATTGTATCGCAATCAGTTAAAACTTTCAACAATGGATCTCTTGGTTCCGGC
>869d7ea782f906d42ec8428e6905bba5
AAAAGTCGTAACAAGGTATCCGTAGGTGAACCTGCGGATGGATCATTAGTGAATGCGGCGCGCCGCGCGCAAGCGAGGCGTCGCCAGCAACCCACCCTTGTGCAATGTACCGTACCCTGGCGGGGGCCTTTGGGCGTCCGCCGAAGGGAGGCTGCCTTTCGGGGCGGCTTTCCGAACCAACACGTTAACCACCGACTGACATCCAAGTAATTTAATGTTAAACAACTTTTGACAACGGATCTCTTGGCTCTC
>4b02c21ec32a07780f3b602861f344fa
CGGGAACCAAGAGATCCGTTGTTAAGAGTTGTTCTTAGTTTCGTATTTTCTTCGTTATCTTTCAGTAAAGAAAGAACACAAAGTTTTGGTTCAGTACAAAAGAGTACAAAGGGGTTTATAAAGTAAAAAATTTCCAACTTCTCGCGGTGAGGAAGGGAGGGAACAGTAAAGTTCCAGCCCAACCACTCCACCCTACCCGAGGGTAGGTGAGAGAAGCGGAAAAGGGGGGCACCGAGGTGTTAACCTCGGTAACGGTAACTAGTGCACAGAGGGGTTGATACGTGGATTCGTGTTAATGATCCTTCCGCAGGTTCACCTACGGAAACCTTGTTACGACTTTTA
>bf314fa2cbffb61444153f8ee3038e39
CAGAACCAAGAGATCCGTTGTTGAAAGTTTTGATTCATTTGTTTTTTGCCTTTCGGCCACTCAGAAGAATACTGCTTTCGCAAAATCAAGAGTTTGTGGTCTCCGGCGGGCGCGTGGTCCCGGGAGCCCGCTGGGGGCAACCCGGCGCGACACCGCCGAAGCAACATAAAGGTAGGTTCACATAGGGTTGGGAGTTGATAAACTCGATAATGATCCCTCCGCTGGTTCACCAACGGAGACCTTGTTACGACTTTT
>9777f855d0d789c6512ec6e16dba7ac4
GCGAGAGCCAAGAGATCCGTTGTTGAAAGTTGTATTTTGAATTATTTTATTCATAATATTTTTCAGACAAAGAGTTAAAAAATTAGGTTGATGTTTGGCCGATCTCCATAAAGAAGATCGACTGACATTGCACACAAGGTGGATATGGATTTAAAAAGTGCCATAAAACACTTATTATGAATGATCCTTCCGCAGGTTCACCTACGGAAACCTTGTTACGACTTTTAC
>409e987b660488f62673375f781c15d2
CAGAACCAAGAGATCCGTTGTTGAAAGTTTTAACTTATTTGTTTGTTTACTCAGAGATGCCGCTATAATACAGGAGAGTTTCGTACCTCCGGCGGGCGCCCCTCGACCTCCGGGGAGGCCGGGGCTGCGGCGACCCGAGGGCCTCCGCGCCGCCGAAGCAACTTGGATTGGTTCGCGATGGTTTTAAGTAGCCTTTCGGCTTCTTGTAATGATCCCTCCGCTGGTTCACCAACGGAGACCTTGTTACGACTTTT
>fd83632a6a361a4b716cb5dd6a55fcb0
AAAAGTCGTAACAAGGTCTCCGTTGGTGAACCAGCGGAGGGATCATTACTGAGTTTACAACTCCCAAACCCCTGTGAACATACCTATGTTGCTTCGGCGGGCCGTCCCGCGGCGCGTCCACGTGGCGTGACCCGGAACCAGGCGCCCGCCGGGGACCCAAACTCTTGCCTTTTAGTGTCTCTTCTGAGTGGCATAAGCAAAAATAAACAAAACTTTCAGCAACGGATCTCTTGGTTCTG
>18afd9e0dcad5561e1ec10532beb1d2c
TAAAAGTCGTAACAAGGTTTCCGTAGGTGAACCTGCGGAAGGATCATTAAAGAGACGTTGCCCTTCGGGGTATACCTCCCACCCTTTGTTTATTTATACCTTTGTTGCTTTGGCAGACCCGGCTTCGGCCCACCGGCTCCGGCTGGTCAGTGTCTGCCAGAGGACCTAAAACTCTGTTTGTTAATATTGTCTGAGTACTATATAATAGTTAAAACTTTCAACAACGGATCTCTTGGTTCTGG
>0572297dca20e17dc8d07c30308ccbcd
GTAAAAGTCGTAACAAGGTTTCCGTAGGTGAACCTGCGGAAGGATCACTAGTGATTAAATCGAGAGTGTCTTCATTGACCTCTCACCCTTCACATCCACATACACCTGTGCACCGTTTGGCTCTTTTAAAAGACGCAAGTCTGCAAAGAGAGTCATCAATTTTATACATACCCCAGTCTTATGAATGTAACAGTTTTAATAAACATAATAAAACTTTTAACAACGGATCTCTTGGTTCTCGC
>eeba030b0ccfc13628ce78a0b5259291
TAAAAGTCGTAACAAGGTTTCCGTAGGTGAACCTGCGGAAGGATCATTACTGAGTGATTGGGCTCCGCCCAAACCTCCACCCATTGTATACCTTACCTCTGTTGCTTCGGCGGGCCCCCGGGGTTACTCCCGCCGTCGGCTTCGGCTAACGAGTGCCCGCCAGAGTCCACCCAAACATACATTTTTTCTGACGTCTGAGTAAAAATTAAATAGTAAAAAACTTTCAACAACGGATCTCTTGGTTCTGG
>a684638ee994b973062a7ce832d22231
TAAAAGTCGTAACAAGGTTTCCGTAGGTGAACCTGCGGAAGGATCATTAAAGAGACGTTGCCCTTCGGGGTATACCTCCCACCCTTTGTTTATTTATACCTTTGTTGCTTTGGCAGACCCGGCTTCGGCCCACCGGCTGCGGCTGGTCAGTGTCTGCCAGAGGACCTAAAACTCTGTTTGTTAATATTGTCTGAGTACTATATAATAGTTAAAACTTTCAACAACGGATCTCTTGGTTCTGG
>762dc5b64cdf6dc98629449046b41b06
AAAAGTCGTAACAAGGTTTCCGTAGGTGAACCTGCGGAAGGATCACTAGTGATTAAATCGAGAGCGTCTTCATTGACCTCTCACCCTTCACATCCACATACACCTGTGCACCGTTTGGCTCTTATAAAAGACGCAAGTCTGCAATGAGAGTCATCAATTTTATACATACCCCAGTCTTATGAATGTAACAGTTTTAATAAACATAATAAAACTTTTAACAACGGATCTCTTGGTTCTC
>a308bf9c897837cd6487d9eaf1c5cac0
GAGAGCCAAGAGATCCGTTGTCAAAAGTTGTTTAACATTAAATTACTTGGATGTCAGTCGGTGGTTAACGTGTTGGTTCGGAAAGCCGCCCCGAAAGGCAGCCTCCCTTCGGCGGACGCCCAAAGGCCCCCGCCAGGGTACGGTACATTGCACAAGGGTGGGTTGCTGGCGACGCCTCGCTTGCGCGCGGCGCGCCGCATTCACTAATGATCCATCCGCAGGTTCACCTACGGATACCTTGTTACGACTTTT
>eb2b76f3c645a6a3c6fd5cc5e9ac614d
AAAGTCGTAACAAGGTTTCCGTAGGTGAACCTGCGGAAGGATCATTAACAGATGCTGCTAGTCAGATATCTTACCCCGTGTGAACTGTTCTTTTGACTTGGTGTCCAAGCACTGAATCTTCCAAGACTTTCTTGGCGGATTTACGTCTGGGCACCATCCGTTTTTACCCTTTGACTTTGAATGCCGAGTAAATTACAAAAGACTAGAAAACTTTTAGCAACGGATCTCTAGGCTCT
>5c44bd70b2ade56fdec41ccec4ebbf70
GCAAGAGCCTAGAGATCCGTTGCTAAAAGTTTTCTAGTCTTTTGTAGTTTACTCGGCATTCAAAGTCAAAGGGTAAAAACGTATGGTGCCCAGACGTAAATTCGACAAGAAGGTCTTGAAGAATCTAGTGCTCAGACACCAAGTCAAAAGAACAGTTCACACGGGGTTAGATATCTGACTAGCAGAATCTGTTAATGATCCTTCCGCAGGTTCACCTACGGAAACCTTGTTACGACTTTTAC
>19ee606cab6cdf8b0cc7948bbfa19eb7
GTAAAAGTCGTAACAAGGTTTCCGTAGGTGAACCTGCGGAAGGATCATTCATAATAAGTGTTTTATGGCACTTTTTAAATCCATATCCACCTTGTGTGCAATGTCAGTCGATCTTCTTTATGGAGATCGGCCAAACATCAACCTAATTTTTTAACTCTTTGTCTGAAAAATATTATGAATAAAATAATTCAAAATACAACTTTCAACAACGGATCTCTTGGCTCTCGC
>86676557b0a2990f1220b1b5ad1dfa80
GTAAAAGTCGTAACAAGGTTTCCGTAGGTGAACCTGCGGAAGGATCATTAAAAATGAAGCCGGGAAACCGGTCCTTCTAACCCTTGATTATCTCAATTTGTTGCTTTGGTGGGCCGCGCAAGCACCGGCTTCGGCTGGATCGTGCCCGCCAGAGGACCACAACTCTGTATTAAATGTCGTCTGAGTACTATAAAATAGTTAAAACTTTCAACAACGGATCTCTTGGTTCTGGC
>4bb265c6c7bda5a24e4c05698ae36c38
AAAAGTCGTAACAAGGTCTCCGTTGGTGAACCAGCGGAGGGATCATTACAAGAAGCCGAAAGGCTACTTAAAACCATCGCGAACCAATCCAAGTTGCTTCGGCGGCGCGGAGGCCCTCGGGTCGCCGCAGCCCCGGCCTCCCCGGAGGTCGAGGGGCGCCCGCCGGAGGTACGAAACTCTCCTGTATTATAGCGGCATCTCTGAGTAAACAAACAAATAAGTTAAAACTTTCAACAACGGATCTCTTGGTTCTG
>161779840f1f7dcaeaa81aa6f0d6a549
AAAAGTCGTAACAAGGTTTCCGTAGGTGAACCTGCGGAAGGATCATTACAAATCCATCCACGTCTCTCTCTGAGACCACGTTGAAATGTTCCCCAGACCAGGAGGGTCTCCGCTTCCTTTCCGGCTGCCTTGACTTCCCGTCTTGGTGCGCCTGCCTGGGAGAGGAGGCCTCCCCTGGCCTGGGCTGTGAAACGAGTGTTACTTTGTTGCCCAAATGTATCTTGATTTCCATCAAACGAAAACTTGTACAACTTATAACAATGGATCTCTAGGCTCTT
>e4189eb0184937c405a90f6676332cc4
CGAGAACCAAGAGATCCGTTGTCAAAAGTTGTTTAAAGATTAATTTCTTTATGGTATAAGACTGGTATGGAATGAGTTTAATAAGCAGCGAGTCCTGGCGGCAAGTTGCCTTGCTACCACGTCTCACTGAATAAAAGACAGGGGTTTGTGAGGGAGCTTCCTTGAAGGGTTGCTCCCAAACACCCAACATGCACCAAGCTTTGACACTCGGCGCACAGAGGGCTATCAATGAAATTCATTAATGATCCAACCGCAGGTTCACCTACGGTTACCTTGTTACGACTTTTA
>17897a937b77be170f35d546797554e3
AAAGTCGTAACAAGGTCTCCGTTGGTGAACCAGCGGAGGGATCATTACAGAGCTTAACAACTCCCAAACCCCTGTGAACATACCACCGTTGCTTCGGCGGGTACGCCCCGGGCGCGCGCAAGCGTGCCCCGGAACCAGGCGCCCGCCGGGGGAAACAAACTCTTGTCTTACTTTTGTATCGTCTGAGTGGATTATTAAATAAATCAAAACTTTCAACAACGGATCTCTTGGCTCT
>02fb682d8d9ec157bde29199906c5bb5
AAAGTCGTAACAAGGTCTCCGTAGGTGAACCTGCGGAGGGATCATTACAAGTGACCCCGGTCTAACCACCGGGATGCTCATAACCCTTTGTTGTCCGACCACGTTGCCTCCGGGGCGACCCTGCCTTCTGGCGGGGGCCCCGGGTGGACACATTCAAACTCTTGCGTAACTTTGCAGTCTGAGTAAATTTAATTAATAAATTAAAACTTTCAACAACGGATCTCTTGGTTCT
>edb97d7915c7777ad529737d7a6cb642
CAGAACCAAGAGATCCGTTGTTGAAAGTTTTAGTTTTATTTAACTAGTTTCAGATTTAACATGGTTCAAAGAGTTTTGTGTAGGCTACTGACGAGCACTGGCCAGAGGTCAAAAGACCCCCGGCGGTCCGGTTAAAGACGGGCCCGCCAAAGCAACATGGTAGTTATACAAAGGGTTGGAGATCGGGCCTAGAAGACCCTAACTCATTAATGATCCTTCCGCAGGTTCACCTACGGAAACCTTGTTACGACTTTT
>4597a42c38bd0ef37671ad31ba80d3f1
AAAGTCGTAACAAGGTTTCCGTAGGTGAACCTGCGGAAGGATCATTCACAAACGATTCTATATCGACCCATTTGTGTGAACCAACCCTTTATATATATTGAATTGTGGACCAAAGTAAGCTTGCTTGCTTCCATGATTTATATTTTAACCCATTGTGAACCAAGTCAGTTCTGACCGAATGAACGTTAGTCGTTTGGTCTGGCAGCATCGCAAGATGTCTCCAGTTAAACATAACAACTTAATGACAACTTTAAACGGTGGATCTCTTGGCTCG
>b6e86b966bbc379df9442f594f0bd047
CCAGAACCAAGAGATCCGTTGTTGAAAGTTTTGATTCATTTGTTTTTTGCCTTTCGGCCACTCAGAATAATACTGCTTTCGCAAAATCAAGAGTTTGTGGTCTCCGGCGGACGCGTAGTCCCGGGAGCCCCCCAGGGGAGCAACCCGGCGCGAGACCGCCGAAGCAACATAAAGGTAGGTTCACATAGGGTTGGGAGTTGGATAAACTCGATAATGATCCCTCCGCTGGTTCACCAACGGAGACCTTGTTACGACTTTTA
>492a839d80d559391ad277f97feaa84b
TAAAAGTCGTAACAAGGTTTCCGTAGGTGAACCTGCGGAAGGATCATTAATGAATTCTGAGTAGGCTCTGCCTCTCACCCTTCATATCCATAAACACCTGTGCACAGTCGGACCCTTGAGTCTTTCGGGACTCCTGGTGTCTTGACGATCTTATCAAACAACAATGTAACCAATGTAATCATTATTATAACATAATAAAACTTTTAACAACGGATCTCTTGGCTCTCG
>353688a9a3baa771d83991dd7ec9a6e5
CAGAGCCAAGAGATCCGTTGTTGAAAGTTTTAAATATTAAAATTTTACTCAGACGACACTAATAATTCAGGGTTTTGGGTCCTCTGGCGGGCACTTACCAGCCGAAGCCAGTAGCTAGGCGGCCCGCCAAAGCAACAAAGGTATAGTATACAAAGGGTGGGAGATCTACCCGTAAGGGCATGAACTCGGTAATGATCCTTCCGCAGGTTCACCTACGGAAACCTTGTTACGACTTTT
>38c655f8ddc107a5524ed7b4cdb4bdd4
GTAAAAGTCGTAACAAGGTTTCCGTAGGTGAACCTGCGGAAGGATCATTGACACTATCCAAACCTCAAACCTATCGTGAATTTGTATAACCCCTTAAGAGTTGTCGCCGTGAAACAGTTGGCCTGTTGATGCACAGAGATTTTTTTTAATAAAATGGTTACTCTGTGTGTTGGCGTCGTGCTGCTGTTGAACATTGTCGAGGACTCTGCCTTTCAACCAACTTATTTCTTTATAACCCAATTAACCCTTTGCTCTGAACTTAACAACTATTGTTATATTTATTTTAACAAAAGAACAACTCTTAGCAACGGATATCTTGGTTCACGC
>22e9eb2d4d8f7a3387164d22832423c3
AAAAGTCGTAACAAGGTTTCCGTAGGTGAACCTGCGGAAGGATCATTACCGAGTTCATGCCCTTACGGGTAGATCTCCCACCCTTTGTATACTATACCTTTGTTGCTTTGGCGGGCCGCCTAGCTACTGGCTTCGGCTGGTAAGTGCCCGCCAGAGGACCCAAAACCCTGAATTATTAGTGTCGTCTGAGTAAAATTTTAATATTTAAAACTTTCAACAACGGATCTCTTGGCTCTG
>4eaef1b39ccd5af83eaa7cd5f58a3e96
AGAGCCAAGAGATCCGTTGTTGAAAGTTTTTTTTTGTTTTTTATTTCATGACATACTTTGACTAATGTTTAAAATGAAGCCGCAAGGTAGTTTCACTCGAAAGTTCCATTACCTCGCCATCAAGTGCACAGTGTTAGAAGTGGAGGTCAGGCTCTACAAGTAGACGCCCTATAATTCACTAATGATCCTTCCGCAGGTTCACCTACGGAAACCTTGTTACGACTTT
>54864f5ef66c802d6512c51875d7af24
AGAGCCAAGAGATCCGTTGTTGAAAGTTTTTTTTTATTTCGATATTTCGTTACATACTTTGACTAGTGTTTAAAATGAGCCGTAGAAAGCAAGGATTCGCATGTCATACGGATTCTACCGAAGTCCGTTATCGTGCTTGTCCAAGTCCTCCACCGATAAATGCACAGAGTTAGAAAGTGGGGGTTCAGGCCAGACCGAAGTCTACGCCCTTAAATTCACTAATGATCCTTCCGCAGGTTCACCTACGGAAACCTTGTTACGACTTT
>abe17e3775e56e5143a3622f18d8eac6
TAAAAGTCGTAACAAGGTTTCCGTAGGTGAACCTGCGGAAGGATCATTAACAAATCATGTTGCATGTCGAGCCCGCAAGGGACCTCGTACATGTATATATACCCCGAGTCTGATGATCCTCACGGATTGTCGGCTTTGGTTGGGCAGGCTAGGCTTTCGGGCCTGGACTGCTCCGGACAGTGTGCTTGGAGACACCTTTAGGGGTGACTTTGGGTGCCTGGCCACATAGACGCTTATTAGTTTGACAGAGTTTAGGTTGAAACCAATAAAAATGACAACTTTTAACAATGGATCTCTTGGCTCTTG
>5732f2a76ce62e0a6bdd3a8281c398f0
TAAAAGTCGTAACAAGGTTTCCGTAGGTGAACCTGCGGAAGGATCATTCATAATAAGTGTTCTACTGCACTTTTTAAACAAGTACTCACCTTGTGTGCAATGTTTGCTGTCAAGTCGTTTATTCGTCTTGATAGCACAATACCAACCTTTATTGTAAATTTTTTGTCTGAAGCTATTTCGAATATATAATTCTAAATACAACTTTCAACAACGGATCTCTTGGCTCTCG
>7e8ec2dcec01dd380b502312e9f797b7
AAAAGTCGTAACAAGGTCTCCGTAGGTGAACCTGCGGAGGGATCATTACAGAGAACATCGCCCGCAAGGGTGACTCTCCAACCCTATGTTAATTATACCTTTGTTGCTTTGGCGAGCCGCTTCGGCCACCGGCTCACGCTGGTGAGCGCTCGCCAGAGGACCCTAAACTCTGTTTATACATGTCGTCTGAGTACTATATAATAGTTAAAACTTTCAACAACGGATCTCTTGGTTCTG
>be352c448bc45098bc7492a50d9ad03e
AGCGTCGTAACAAGGTTTCCGTAGGTGAACCTGCGGAAGGATCATTAAAGAGACGTTGCCCTTCGGGGTATACCTCCCACCCTTTGTTTATTATACCTTTGTTGCTTTGGCGGGCCCGTCCTCGGACCACCGGCTTCGGCTGGTCAGCGCCCGCCAGAGGACCTAAAACTCTGTTTGTTCATATTGTCTGAGTACTATATAATAGTTAAAACTTTCAACAACGGATCTCTTGGTTCT
>598f600e88b30dfb1dfd32f4e0be6b68
CAGAACCAAGAGATCCGTTGTTGAAAGTTTTAACTATTATATAGTACTCAGACGACATGTATAAACAGAGTTTAGGGTCCTCTGGCGAGCGCTCACCAGCGTGAGCCGGTGGCCGAAGCGGCTCGCCAAAGCAACAAAGGTATAATTAACATAGGGTTGGAGAGTCACCCTTGCGGGCGATGTTCTCTGTAATGATCCCTCCGCAGGTTCACCTACGGAGACCTTGTTACGACTTTT
>da9ebc2d36719633f6672d4fed6ce52d
GAGAACCAAGAGATCCGTTGTTAAAAGTTTTATTATGTTTATTAAAACTGTTACATTCATAAGACTGGGGTATGTATAAAATTGATGACTCTCATTGCAGACTTGCGTCTTTTATAAGAGCCAAACGGTGCACAGGTGTATGTGGATGTGAAGGGTGAGAGGTCAATGAAGACGCTCTCGATTTAATCACTAGTGATCCTTCCGCAGGTTCACCTACGGAAACCTTGTTACGACTTTT
>8b6fd31305054f404b7f65671ea589b3
CCAGAACCAAGAGATCCGTTGTTGAAAGTTTTAACTATTATATAGTACTCAGACATTATAGACAAACAGAGTTTAGGTCCTCTGGCAGACGCTCGCCGGCCGGAGCCAGCAGCCCGAGGGCAGGCCTGCCAAAGCAACAAAGTGTAATAAACAAAGGGTGGTAGGTTACCCGGGAGGCCTTGCGGCAACCCGGATGACTACTGTAATGATCCTTCCGCAGGTTCACCTACGGAAACCTTGTTACGACTTTTA
>cdcb2ee18279177be68455ee3ef88873
AAAGTCGTAACAAGGTTTCCGTAGGTGAACCTGCGGAAGGATCATTACAGTAGTCACCCAGGTTGCCGCAAGGCCTCCTGGGTAACCTACCACCCTTTGTTTATTACACTTTGTTGCTTTGGCAAGCCTGCCCTCGGGCTGCTGGCTCCGGCCGGCGAGCGCTTGCCAGAGGACCTAAACTCTGTTTGTCTATACTGTCTGAGTACTATATAATAGTTAAAACTTTCAACAACGGATCTCTTGGTTCT
>5dacae8adcd2c06b06c0141af6df0dff
CGAGAGCCAAGAGATCCGTTGTTGAAAGTTTTTTTTTGTTTCGATATTTCGTTACATACTGGTACTAATGTTTAATGGTAAAATTAGCCAAACAGCTCCACGTCCGAAGACGCTTTGCCAGATGACCGAATAATGCACAGTGTTAGAAGTGGAGGGTCAGGCTCTACAAGTAGACGCCCTAATATTCACTAATGATCCTTCCGCAGGTTCACCTACGGAAACCTTGTTACGACTTTTA
>0a72b8212b53c4d6d9f2ffada35fb219
CCAGAACCAAGAGATCCGTTGTTGAAAGTTTTAACTATTATATAGTACTCAGACAATATTAACAAACAGAGTTTTAGGTCCTCTGGCAGACACTGACCAGCCGGAGCCGGTGGGCCGAAGCCGGGTCTGCCAAAGCAACAAAGGTATAAATAAACAAAGGGTGGGAGGTATACCCCGAAGGGCAACGTCTCTTTAATGATCCTTCCGCAGGTTCACCTACGGAAACCTTGTTACGACTTTTA
>293e949d0a6af8ebb053c899f11f1d92
GCCGGAACCAAGAGATCCATTGTTGAAAGTTTTAACTGATTGCGATACAATCAACTCAGACTTCACTAGATCAGACAGAGTTCGTGGTGTCTCCGGCGGGCGCGGGCCCGGGGCTGAGAGCCCCCGGCGGCCATGAATGGCGGGCCCGCCGAAGCAACTAAGGTACAGTAAACACGGGTGGGAGGTTGGGCTCGCTAGGAACCCTACACTCGGTAATGATCCTTCCGCAGGTTCACCTACGGAAACCTTGTTACGACTTTTAC
>c861f04e720b587d646d0203b28d04cc
AGAGCCAAGAGATCCGTTGTTGAAAGTTTTGATTTATTTAATAATCCACTCAGACGATACAAAAGTAAGACAAGAGTTTGTTTCCCCCGGCGGGCGCCTGGTTCCGGGGCACGCTTGCGCGCGCCCGGGGCGTACCCGCCGAAGCAACGGTGGTATGTTCACAGGGGTTTGGGAGTTGTTAAGCTCTGTAATGATCCCTCCGCTGGTTCACCAACGGAGACCTTGTTACGACTTT
>a08c20650d963f77288ae8619cfb4351
AAAAGTCGTAACAAGGTTTCCGTAGGTGAACCTGCGGAAGGATCATTCATAATAAGTGTTTTACTGCACTTTTTAAAAATAGTACTCACCTTGTGTGCAATGTTGTGTTTCTTTTCGGAGAAACACCTACACCAACCTATAACCTTGAACCACTTTGTCTGAAAAACTATTATGAATACTTAATTCAAAATACAACTTTCAACAACGGATCTCTTGGCTCTC
>d3e2d0b5f60b5a8e64dc82282ef01cf7
CCAGAACCAAGAGATCCGTTGTTGAAAGTTTTAACTATTATATAGTACTCAGACGACATTTATTACAGAGTTGTGGTTCTCTGGTGGGCACTAACCAGCCGGAGCCAGTGCTTGCGCGGCCCACCAAAGCAACAAATTATGATAATCAAGGGTTAGAAGGACCGGTTTCCCGGCTTCATTTTTAATGATCCTTCCGCAGGTTCACCTACGGAAACCTTGTTACGACTTTTA
>3125f378a7b55c85f0daa34b45582c0a
ATGCGAGAGCCAAGAGATCCGTTGTCAAAAGTTGTTTAGCTTTCACTTTATAAAGACGTATATTAGATTTGGTAGTTTGGAGCACGCCGAGACGCGCTCCAGAAACAGCATTGATGCACAGGTTTATAGACTTTCGTCAATTGGTAATGATCCAACCGCAGGTTCACCTACGGTTACCTTGTTACGACTTTTACTTCCTCTAAATG
>677494094a4e5f1d8e0893d9a8b4967f
GTAAAAGTCGTAACAAGGTTTCCGTAGGTGAACCTGCGGAAGGATCATTAAAAACGTCCTTCACCCTGGATGCAAGTCCGGGTGGACCAGCCGATCGGGGCTCTAAACCACGTAATGCCACGCCGTCGAAAGCCTCCCTGGAGGTGGCGTGGTACTCGTCACTTCAAACCATTGTGAATCTTCCCGTTGCTTTGGCGGCAGGCCTCCGTGCCGTCAGCCCGTCCGAGGCCCACCATAAACCATTTCTGTAAACTTCAGTCAGTATACGAATAAAGTAAATCGTTAAAACTTTCAACAACGGATCTCTTGGTTCTCGC
>f07aa4d31463443304c74b7ecd291a67
CCAGAACCAAGAGATCCGTTGTTGAAAGTTTTAACTATTATATAGTACTCAGACAGTATAGACAAACAGAGTTTAGGTCCTCTGGCAAGCGCTCGCCGGCCGGAGCCAGCAGCCCGAGGGCAGGCCTGCCAAAGCAACAAAGTGTAATAAACAAAGGGTGGTAGGTTACCCGGGAGGCCTTGCGGCATCCCGGATGACTACTGTAATGATCCTTCCGCAGGTTCACCTACGGAAACCTTGTTACGACTTTTA
>f14681d4431f7a794f7c3ffdbfceb09c
CAAGAGCCTAGAGATCCGTTGCTAAAAGTTTTCTAGTCTTTTGTAGTTTACTCGGCATTCAAAGTCAAAGGGTAAAAACGGATGGTGCCCAGACGTAAATTCGACAAGAAGGTCTTGAAGAATCTAGTGCTCAGACACCAAGTCAAAAGAACAGTTCACACGGGGTTAGATATCTGACTAGCAGAATCTGTTAATGATCCTTCCGCAGGTTCACCTACGGAAACCTTGTTACGACTTTTA
>5f05f41f3c9d7993850db2b9ab309eef
CCAGAACCAAGAGATCCGTTGTTGAAAGTTTTTTACTATTTAATTTTTACTCAGACGTCAGAAAAAATGTATGTTTGGGTGGACTCTGGCGGGCACTCGTTAGCCGAAGCCGACGGCGGGAGTAACCCCGGGGGCCCGCCGAAGCAACAGAGGTAAGGTATACAATGGGTGGAGGTTTGGGCGGAGCCCAATCACTCAGTAATGATCCTTCCGCAGGTTCACCTACGGAAACCTTGTTACGACTTTTA
>5a58c68ee7f41a5c3e985d56031282e8
GCGTGAACCAAGATATCCGTTGCTAAGAGTTGTTCTTTTGTTAAAATAAATATAACAATAGTTGTTAAGTTCAGAGCAAAGGGTTAATTGGGTTATAAAGAAATAAGTTGGTTGAAAGGCAGAGTCCTCGACAATGTTCAACAGCAGCACGACGCCAACACACAGAGTAACCATTTTATTAAAAAAAATCTCTGTGCATCAACAGGCCAACTGTTTCACGGCGACAACTCTTAAGGGGTTATACAAATTCACGATAGGTTTGAGGTTTGGATAGTGTCAATGATCCTTCCGCAGGTTCACCTACGGAAACCTTGTTACGACTTTTAC
>c4ced1624877567105650acbb0b26ee6
TAAAAGTCGTAACAAGGTTTCCGTAGGTGAACCTGCGGAAGGATCATTACAGTAGTCATCCGGGTTGCCGCAAGGCCTCCCGGGTAACCTACCACCCTTTGTTTATTACACTTTGTTGCTTTGGCAGGCCTGCCCTCGGGCTGCTGGCTCCGGCCGGCGAGCGTCTGCCAGAGGACCTAAACTCTGTTTGTCTATAATGTCTGAGTACTATATAATAGTTAAAACTTTCAACAACGGATCTCTTGGTTCTGG
>a7ae7626a7cc5d26b022e034e460ca64
GTAAAAGTCGTAACAAGGTAACCGTAGGTGAACCTGCGGTTGGATCATTAACAATTTTGGGCTTTAGAGCTCTTAATACTGGGGCCGCCTCAAAACGGCCTTGGTCAACACTTGTGAACTATAGATGCTACCGCATTCTTAACCCCTTTATAAAACCCGTCTTAATCAAATAACAAAATTTGAAACAACTTTTGACAACGGATCTCTTGGCTCTCGC
>95b54233a3dfbad6b9424db565a44b28
CAAGAGCCAAGAGATCCATTGTTAAAAGTTGTCATTTTTATTGGTTTCAACCTAAACTCTGTCAAACTAATAAGCGTCTATGTGGCCAGGCACCCAAAGTCACCCCTAAAGGTGTCTCCAAGCACACTGTCCGGAGCAGTCCAGGCCCGAAAGCCTAGCCTGCCCAACCAAAGCCGACAATCCGTGAGGATCATCAGACTCGGGGTATATATACATGTACGAGGTCCCTTGCGGGCTCGACATGCAACATGATTTGTTAATGATCCTTCCGCAGGTTCACCTACGGAAACCTTGTTACGACTTTTA
>b899e4b4b3b79ea79d1bc8a34b22a5fc
AGAGCCAAGAGATCCGTTGTTGAAAGTTTTTTTTTGTTTTAATATTTCATTACATACTTTGACTAATGTTTAAAATGAAGCCGCAAGGTAATTTCACTCGAAAGTTCCATTACCTCGCCATCAAGTGCACAGTGTTAGAAGTGGAGGTCAGGCTCTACAAGTAGACGCCCTATAATTCACTAATGATCCTTCCGCAGGTTCACCTACGGAAACCTTGTTACGACTTT
>d0a19cc5a945ad89f53cf298ab4421b4
GCGGGAACCAAGACATCCACCGTTGAGAATTTGGTTTTTGTAATGGATCTTAATTAGAATTCTTTGGTTGAATTAGTTTTGAAATGTGCTACAGCAATGTTACCACTGCTGCAACTAAAGGCTTCGTTGAGTTGATTGGATTAGTGTTAATGATCCTTCCGCAGGTTCACCTACGGAAACCTTGTTACGACTTTTACTTCCTCTAAA
>c2e6f1dd9d8275c0e81fa82edbe065a9
GTAAAAGTCGTAACAAGGTCTCCGTAGGTGAACCTGCGGAGGGATCATTACAAGTGACCCCGGCTACGGCCGGGATGTTCATAACCCTTTGTTGTCCGACTCTGTTGCCTCCGGGGCGACCCTGCCTTCGGGCGGGGGCTCCGGGTGGACACTTCAAACTCTTGCGTAACTTTGCAGTCTGAGTAAACTTAATTAATAAATTAAAACTTTTAACAACGGATCTCTTGGTTCTGGC
>6d68a21e985b26e3f8a461dbb81360ca
AAAAGTCGTAACAAGGTTTCCGTAGGTGAACCTGCGGAAGGATCATTAACAGATTCTGCTAGTCAGATATCTAACCCCGTGTGAACTGTTCTTTTGACTTGGTGTCTGAGCACTAGATTCTTCAAGACCTTCTTGTCGAATTTACGTCTGGGCACCATCCGTTTTTACCCTTTGACTTTGAATGCCGAGTAAACTACAAAAGACTAGAAAACTTTTAGCAACGGATCTCTAGGCTCTT
>34532167d0628d2a58527f9e8ff856ec
CAAGAGCCAAGATATCCGTTGCTGAGAGTTGTTTTTGGTTATGTTTCAACTCGCAAGGTAACCAGCGCCGGCCCACTCAGCGAAGCCAAGCGGGGCGCGGAGCTCACTCCCATTGAGTAAAAGGGACTCAGTCATTAGGTCAAGGTGGACGCATCGTGGAGACCCGACGCCGCGAGGTCACGACCTCGTGACGAAGGGAGACGGCAGGCCGCGACGCCGCGAGGCGCCACGACCCACCGAGGGGGACAATGTGTTCGTTCGCCGCGGGTTGGCTGCAACTTGTGTGTGCAATGATCCTTCCGCAGGTTCACCTACGGAAACCTTGTTACGACTTTTA
>85dc153b8b61e8e51e5deaf546d07649
CGAGCCAAGAGATCCACCGTTAAAAGTTGTCTTTTAATTTAAAGTTTTTTTTTAATATAATTAAAATAAATTAATCAAGTTAAAAAGTTAAAAATCAGACATCATTTGGTTGATCAAGTGGTTCAATTGAAATAAAGGATTAATTTGGCTTCAAAATGAATTGAAACCAAAAAATTCCAAAAAAACAGTAGTACAAGACTAAGGTTTTTTATTAACATTTCACACATTGGGTTGATATTGTTTTAATTAGGATTTGTTGATGATCCTTCCGCAGGTTCACCTACGGAAACCTTGTTACGACTTT
>1d3d74293800d1e1b12314879669796e
CAGGTCGTAACAAGGTTTCCGTAGGTGAACCTGCGGAAGGATCATTAACACGTACTCACGTATCAACCCCCTGTGCACTTACAACTTAACACCGGATTCAGTGGTGAAGTTCCTTTCGGGGGAACGGAGCTTAAAATGGTGACACTCTTCTCATTTTTTTAACCCCTTTTTACAGAAAAATTGTACTAAAAATGAAGCTTGCTCTGCCGTATATCCTTTGGTTAATTTATTAATTACTTGATTGCGAGTTTAAAGGAAGTGGAATTACGAAACGCTGAACAACTCTTAGCAACGGATATCTTGGTTCT
>776b8048cc83d0f8f92ad5a0bd52902a
GAGAGCCGAGGGATCCATCGTTAAAAGTTGTAATAGTTTTTTTTGTTTTTTATGGTAAATGTTTTGTGGTAGTTTATAAGGTAAAAAAAGGTAGCATTTGTCCATTTCTTTTCCTGTTTTCAAAGAAAATAGAGTGAAGAAAGAAAACGCAGCCAACAAAAGAAAAACACAGAAACTTTAGTGTTAACTAATAGTTTGCAAAAGGTTGGGTTGTTAAAGAAATCACATGAATGATCCTTCCGCAGGTTCACCTACGGAAACCTTGTTACGACTTTT
>b7f9b281c47b77aa08727b4e1a6d88bf
GTAAAAGTCGTAACAAGGTTTCCGTAGGTGAACCTGCGGAAGGATCATTACCGTGGGGCTTCGGCCCCATTGAGATAGCACCCTTTGTTTATGAGTACCCTTGTTTCCTCGGCGGGCTTGCCCGCCATGAGGACATCAAAAACCCTTTGTAGTAGCAGTAACTTCAGTTAATAATAAATATTAAAACTTTCAACAACGGATCTCTTGGTTCTGGC
>a93820204de4c22fb3667615a05a1fe8
GCGAGAACCAAGAGATCCGTTGTTAAAAGTTTTATTATGTTTATTAAAACTGTTACATTCATAAGACTGGGGTATGTATAAAATTGATGACTCTCTTTGCAGACTTGCGTCTTTTAAAAGAGCCAAACGGTGCACAGGTGTATGTGGATGTGAAGGGTGAGAGGTCAATGAAGACACTCTCGATTTAATCACTAGTGATCCTTCCGCAGGTTCACCTACGGAAACCTTGTTACGACTTTTAC
>6fc6f0eb1c1d034a869a602ba3a962dc
GCCAGAACCAAGAGATCCGTTGTTAAAAGTTTTAATTTATTAATTAAGTTTACTCAGACTGCAAAGTTACGCAAGAGTTTGAAGTGTCCACCCGGAGCCCCCGCCCGAAGGCAGGGTCGCCCCGGAGGCAACAGAGTCGGACAACAAAGGGTTATGAACATCCCGGCCGTAGCCGGGGTCACTTGTAATGATCCCTCCGCAGGTTCACCTACGGAGACCTTGTTACGACTTTTAC
>5a19464aa3ece3d460a636da783bedd3
AGAACCAAGAGATCCGTTGTTGAAAGTTTTAACTATTATATAGTACTCAGACAGTATAGACAAACAGAGTTTAGGTCCTCTGGCAAGCGCTCGCCGGCCGGAGCCAGCAGCCCGAGGGCAGGCTTGCCAAAGCAACAAAGTGTAATAAACAAAGGGTGGTAGGTTACCCAGGAGGCCTTGCGGCAACCTGGGTGACTACTGTAATGATCCTTCCGCAGGTTCACCTACGGAAACCTTGTTACGACTTT
>63b6b8840b4b11e35937ce81d091f3bc
CAGAACCAAGAGATCCGTTGTTGAAAGTTTTAACTATTTTTTAGTACTCAGACGACATTTAATACAGAGTTGTGGTCCTCTGGCGGGCACGATCCAGCCGAAGCCGGTGCTTGCGCGGCCCACCAAAGCAACAAATTGAGATAATCAAGGGTTAGAAGGACCGGTTTCCCGGCTTCATTTTTAATGATCCTTCCGCAGGTTCACCTACGGAAACCTTGTTACGACTTTT
>aa58abf3b85b430dd1cdd8de2ad4bdd8
GTAAAAGTCGTAACAAGGTTTCCGTAGGTGAACCTGCGGAAGGATCATTACAGTAGTCGCCTGGGTTGCCGCAAGGCCTCCCGGGTAACCTACCACCCTTTGTTTATTACACTTTGTTGCTTTGGCAGGCCTGCCCTCGGGCTGCTGGCTCCGGCCGGCGAGCGCTTGCCAGAGGACCTAAACTCTGTTTGTCTATACTGTCTGAGTACTATATAATAGTTAAAACTTTCAACAACGGATCTCTTGGTTCTGGC
>ed70c9109df51442da1c84834cac9bc5
GCGAGAACCAAGACATCCGTTGCTAAGAGTTGTTTTTAGATTGTTAATAAAAATGTTAACAAACAACATGTTAAGTTCAGTTAAAAGGGTTGAATGGGGTTAATAAAAAGGTTGGTTGGGTGGAATACCCGAAAAAAAGAGAGGGAAGCTCATACGTGAATATGAACAGCACACACTTTTTTTATAAATCAACAATTCACGAAAGGTTTGAAAGGTTTGGATTAGTGTCAATGATCCTTCCGCAGGTTCACCTACGGAAACCTTGTTACGACTTTTAC
>8a06cd6ee099ab736c7c93f487eccfa3
CCAGAACCAAGAGATCCGTTGTTGAAAGTTTTAACTATTATATAGTACTCAGACAATATTAACAAACAGAGTTTTAGGTCCTCTGGCAGACACTGACCAGCCGCAGCCGGTGGGCCGAAGCCGGGTCTGCCAAAGCAACAAAGGTATAAATAAACAAAGGGTGGGAGGTATACCCCGAAGGGCAACGTCTCTTTAATGATCCTTCCGCAGGTTCACCTACGGAAACCTTGTTACGACTTTTA
>3fb7c21255cf600ac3e1bf4f558e2d7e
AGAGCCAAGAGATCCGTTGTTGAAAGTTTTTAACGATTGTGGTTTTCACTCAGATGACAATTATAAACGGCAATTGATTAGGCCTCTGGCGAATGCCCTCGGGGAACACCCCAGGGCTCGCCAAAGCAACGCGGAAATGTCCACATGGGTGAAGAGGTGGGGGCGGTTGGCCCCCCGGAGCTAGGCTCCACTCTCGGTAATGATCCTTCCGCAGGTTCACCTACGGAAACCTTGTTACGACTTT
>ed0e8554aa41eac4af830e7801857849
AAGAGCCTAGAGATCCGTTGCTAAAAGTTTTCTAGTCTTTTGTAGTTTACTCGGCATTCAAAGTCAAAGGGTAAAAACGGATGGTGCCCAGACGTAAATTCGACAAGAAGGTCTTGAAGAATCTAGTGCTCAGACACCAAGTCAAAAGAACAGTTCACACGGGGTTAGATATCTGACTAGCAGAATCTGTTAATGATCCTTCCGCAGGTTCACCTACGGAAACCTTGTTACGACTTTT
>2f35214e382a35118491f52b08faddff
AGAGCCAAGAGATCCATTGTTAAAAGTTGTCATTTTAGTTTTACAACTGTAACTCTGTCAAACATACAAGCGTCTATGTGGCTGGCAAGGACTTGCGCCCTCACACAGCCGGAGCAGGACTTGCATCCCACCCAACCAAAGCCGGCATTGCTGCCAGGCTCGGGGTAAATATATGCGTCAAGCCCGAGAGCTCGGCCGCATAGCAGATTTGTTAATGATCCTTCCGCAGGTTCACCTACGGAAACCTTGTTACGACTTT
>b2205628901f743cda42e4ab7e72ff1c
TAAAAGTCGTAACAAGGTTTCCGTAGGTGAACCTGCGGAAGGATCATTAGTGAATATTAGGGCGTCTACTTGTAGAGCCTGACCCTCCACTTCTAACACTGTGCATTATTCGGTCATCTGGCAAAGCGTCTTCGGACGTGGAGCTGTTTGGCTAATTTTACCATTAAACATTAGTACCAGTATGTAACGAAATATCGAAACAAAAAAAAACTTTCAACAACGGATCTCTTGGCTCTCG
>c0a4c5d36d7475f86bcfccb7800fcde6
AGAACCAAGAGATCCGTTGTTGAAAGTTTTAACTATTATATAGTACTCAGACAGTATAGACAAACAGAGTTTAGGTCCTCTGGCAAGCGCTCGCCGGCCGGAGCCAGCAGCCCGAGGGCAGGCCTGCCAAAGCAACAAAGTGTAATAAACAAAGGGTGGTAGGTTACCCGGGAGGCCTTGCGGCGCCCCGGGTGACTACTGTAATGATCCTTCCGCAGGTTCACCTACGGAAACCTTGTTACGACTTT
>0b8ff41c055ecaf39649c72fd58d8353
TAAAAGTCGTAACAAGGTAACCGTAGGTGAACCTGCGGTTGGATCATTAACAATTTTGGGCTTTAGAGCTCTTAATACTGGGGCCGCCTCAAAACGGCCTTGGTCAACACTTGTGAACTATAGATGCTACCGCATTCTTAACCCCTTTATAAAACCCGTCTTAATCAAATAACAAAATTTGAAACAACTTTTGACAACGGATCTCTTGGCTCTCG
>46cbd56ac43d08956d42f413dcb7304b
AAAAGTCGTAACAAGGTTTCCGTAGGTGAACCTGCGGAAGGATCATTCATGTGATTTCTTTAACAACCCAACCTTTTGCAAACTATTAGTTAACACTAAAGTTTCTGTGTTTTTCTTTTGTTGGCTGCGTTTTCTTTCTTCACTCTATTTTCTTTGAAAACAGGAAAAGAAATGGACAAATGCTACCTTTTTTTACCTTATAAACTACCACAAAACATTTACCATAAAAAACAAAAAAAACTATTACAACTTTTAACGATGGATCCCTCGGCTCTC
>edc7ecead727c2b17e78e2ad5edcd0cc
CGAGAACCAAGACATCCGTTGCTAAGAGTTGTTTTTAGATTGTTAATAAAAATGTTAACAAACAACATGTTAAGTTCAGTTAAAAGGGTTGAATGGGGTTAATAAAAAGGTTGGTTGGGTGGAATACCCGAAAAAAAGAGAGGGAAGCTCATACGTGAATATGAACAGCACACACTTTTTTTATAAATCAACAATTCACGAAAGGTTTGAAAGGTTTGGATTAGTGTCAATGATCCTTCCGCAGGTTCACCTACGGAAACCTTGTTACGACTTTTA
>668471d3571530bb1225a8a627245efa
GTAAAAGTCGTAACAAGGTTTCCGTAGGTGAACCTGCGGAAGGATCACTAGTGATTAAATCGAGAGCGTCTTCATTGACCTCTCACCCTTCACATCCACATACACCTGTGCACCGTTTGGCTCTTATAAAAGACGCAAGTCTGCAATGAGAGTCATCAATTTTATACATACCCCAGTCTTATGAATGTAACAGTTTTAATAAACATAATAAAACTTTTAACAACGGATCTCTTGGTTCTCGC
>9152887f4aec6d09016ae3b38185ff95
AAAGTCGTAACAAGGTAACCGTAGGTGAACCTGCGGTTGGATCATTACTGATACTTGGTCTATGAGTTGATACCGAAAGGAGTCCTCATAGCCAAATTCACCTCTTGTGCACTATATTGTCTTTTGGTAGTTTATACCTTGGTATAGGCTGCCAAACTTTATAACAAACCATAAAAACTTGTCTGAAATTATAATAAAATATAAACAACTTTTGACAACGGATCTCTTGGCTCT
>1d0de824349e001b3ae74f49141cd0b4
GCACGAGCCAAGAGATCCACCGTTTAAAGTTGTCATTAAGTTGTTATGTTTAACTGGAGACATCTTGCGATGCTGCCAGACCAAACGACTAACGTTCATTCGGTCAGAACTGACTTGGTTCACAATGGGTTAAAATATAAATCATGGAAGCAAGCAAGCTTACTTTGGTCCACAATTCAATATATATAAAGGGTTGGTTCACACAAATGGGTCGATATAGAATCGTTTGTGAATGATCCTTCCGCAGGTTCACCTACGGAAACCTTGTTACGACTTTTAC
>fd450e9b689d91dce197299165b234b5
TAAAAGTCGTAACAAGGTTTCCGTAGGTGAACCTGCGGAAGGATCATTAACAGATTCTGCTAGTCAGATATCTAACCCCGTGTGAACTGTTCTTTTGACTTGGTGTCTGAGCACTAGATTCTTCAAGACCTTCTTGTCGAATTTACGTCTGGGCACCATCCGTTTTTACCCTTTGACTTTGAATGCCGAGTAAACTACAAAAGACTAGAAAACTTTTAGCAACGGATCTCTAGGCTCTTG
>d0afad20a037a3d62f7c6f5c93180463
GCGAGAACCAAGAGATCCGTTGTTGAAAGTTTTAACGATTTACTTTATTCGTATACTGACTGAAGTTTACAGAAATGGTTTATGGTGGGCCTCGGACGGGCTGACGGCACGGAGGCCTGCCGCCAAAGCAACGGGAAGATTCACAATGGTTTGAAGTGACGAGTACCACGCCACCTCCAGGGAGGCTTTCGACGGCGTGGCATTACGTGGTTTAGAGCCCCGATCGGCTGGTCCACCCGGACTTGCATCCAGGGTGAAGGACGTTTTTAATGATCCTTCCGCAGGTTCACCTACGGAAACCTTGTTACGACTTTTAC
>cd093744588649eaea7daf510bca0e4d
AAAGTCGTAACAAGGTTTCCGTAGGTGAACCTGCGGAAGGATCATTACCGAGAGTGGAGCCTAGCTCCGGGGGGCCAACCGCCCCCACCTCTTCACCCATGTGGACATTTCCGCGTTGCTTTGGCGAGCCCTGGGGTGTTCCCCGAGGGCATTCGCCAGAGGCCTAATCAATTGCCGTTTATAATTGTCATCTGAGTGAAAACCACAATCGTTAAAAACTTTCAACAACGGATCTCTTGGCTCT
>4781ed4e7851b3c55d48bccb7087ee6b
CGAGAGCCAAGAGATCCGTTGTTAAAAGTTTTATTATGTTATAATAATGATTACATTGGTTACATTGTTGTTTGATAAGATCGTCAAGACACCAGGAGTCCCGAAAGACTCAAGGGTCCGACTGTGCACAGGTGTTTATGGATATGAAGGGTGAGAGGCAGAGCCTACTCAGAATTCATTAATGATCCTTCCGCAGGTTCACCTACGGAAACCTTGTTACGACTTTTA
>f04875004cda097c12c125beddac4f43
CAAGAGCCTAGAGATCCATTGTTAAAAGTTGTCTACTAATTATCACACACACATTGTCTACATTACACACATTTATATTCAGCCTGCATCTTGCGACACAGGCCGAGTTAATATACTACAGCGCCTTGCGGCACTGCAGCAGGATTTGTTAATGATCCTTCCGCAGGTTCACCTACGGAAACCTTGTTACAACTTTTACTTCCT
>29ca2cf739682c3e0a0f33f4aecf1c0e
AGAACCAAGAGATCCGTTGTTGAAAGTTTTTAATATTATATTTTAAAAATTCAGACTGCAATATGTTACATGTTTGTTGAGTATGTCCTTTGACAGATAAAACTACCATACAGCAGATTATTATATCTGCCAAAGAAAATGAGAATATATAAACATAGGGTATAAATAATTCGCGTTGCCTTTAAAACGCCAATCTTAATTTTCTAATAATGATCCTTCCGCAGGTTCACCTACGGAAACCTTGTTACGACGCT
>3ec27849c2fa5afc43a4d9258abac742
GAGAGCCAAGAGATCCGTTGTTGAAAGTTGTATTTTGAATTAAGTATTCATAATAGTTTTTCAGACAAAGTGGTTCAAGGTTATAGGTTGGTGTAGGTGTTTCTCCGAAAAGAAACACAACATTGCACACAAGGTGAGTACTATTTTTAAAAAGTGCAGTAAAACACTTATTATGAATGATCCTTCCGCAGGTTCACCTACGGAAACCTTGTTACGACTTTT
>e88f4631fff61bd8b95139b4aaa121e9
AAAAGTCGTAACAAGGTTTCCGTAGGTGAACCTGCGGAAGGATCATTACAGTAGTCATCCGGGTTGCCGCAAGGCCTCCCGGGTAACCTACCACCCTTTGTTTATTACACTTTGTTGCTTTGGCAGGCCTGCCCTCGGGCTGCTGGCTCCGGCCGGCGAGCGTCTGCCAGAGGACCTAAACTCTGTTTGTCTATAATGTCTGAGTACTATATAATAGTTAAAACTTTCAACAACGGATCTCTTGGTTCTG
>f67e8f5eed67569b87357f0d59cf8623
GCAAGAGCCTAGAGATCCATTGTTAAAAGTTGTCTACTAATTATCACACACACATTGTCTACATTACACACATTTATATTCAGCCTGCATCTTGCGACACAGGCCGAGTTAATATACTACAGCGCCTTGCGGCACTGCAGCAGGATTTGTTAATGATCCTTCCGCAGGTTCACCTACGGAAACCTTGTTACAACTTTTACTTCC
>7c96dcb8f6e070e2691d32441286a1af
TAAAAGTTGTAACAAGGTTTCCGTAGGTGAACCTGCGGAAGGATCATTAACAAATCCTGCTGCAGTGCCGCAAGGCGCTGTAGTATATTAACTCGGCCTGTGTCGCAAGATGCAGGCTGAATATAAATGTGTGTAATGTAGACAATGTGTGTGTGATAATTAGTAGACAACTTTTAACAATGGATCTCTAGGCTCTTGCATCGA
>5f5f2e6dff8531a09690ff3501cf0fa4
GCCAGAACCAAGAGATCCGTTGTTGAAAGTTTTAACTATTTTATAGTACTCAGACGACATTTAATACAGAGTTGTGGTCCTCTGGCGGGCACGATCCAGCCGAAGCCGGTGCTTGCGCGGCCCACCAAAGCAACAAATTGAGATAATCAAGGGTTAGAAGGACCGGTTTCCCGGCTTCATTTTTAATGATCCTTCCGCAGGTTCACCTACGGAAACCTTGTTACGACTTTTAC
>4f2e8c4d072d0cf3f54e25ecbe737116
AGAACCAAGAGATCCGTTGTTGAAAGTTTTAACTATTATATAGTACTCAGACAGTATAGACAAACAGAGTTTAGGTCCTCTGGCAAGCGCTCGCCGGCCGGAGCCAGCAGCCCGAGGGCAGGCTTGCCAAAGCAACAAAGTGTAATAAACAAAGGGTGGTAGGTTACCCGGGAGGCCTTGCGGCGTCCCGGGTGACTACTGTAATGATCCTTCCGCAGGTTCACCTACGGAAACCTTGTTACGACTTT
>ec4e2770b8eb7f5da6058b24cad73deb
GCCAGAACCAAGAGATCCGTTGTTGAAAGTTTTAACTATTATATAGTACTCAGACAGTATAGACAAACAGAGTTTAGGTCCTCTGGCAAGCGCTCGCCGGCCGGAGCCAGCAGCCCGAGGGCAGGCCTGCCAAAGCAACAAAGTGTAATAAACAAAGGGTGGTAGGTTACCCGGGAGGCCTTGCGGCAACCCAGGCGACTACTGTAATGATCCTTCCGCAGGTTCACCTACGGAAACCTTGTTACGACTTTTAC
>3fd82775c8b3a4f7f920615b6e810cbe
AAAAGTCGTAACAAGGTAACCGTAGGTGAACCTGCGGTTGGATCATTAATGAATTATGGCTCAACGTGAAGTTGAGTCTAATTAGGGGTGAGAGTCTGAAGAGTTGAAAAACTTTGACGAGTCTCCCTCGCTTACCACTGTGAATTGTTTTAGTCTGTTACTGTTGGTTTAAAACCCTTCAGTTGACTACCCAAACATTAAAGTCTTTAGAAACTAGTCTTAATTAAAACAACTTAATGTTGAAACAACTTTTGACAACGGATCTCTTGGCTCTC
>ab60ef849316ec22c1a53286c79d244d
CGAGAGCCAAGAGATCCGTTGTTGAAAGTTTTTTTTTTGTTTTAAATTTCTTTACATACTTTGACTAATGTTTAAAATGAAGCCGAAAGGTTCTCTTCATGAGCTCGAAGGCTCAATCTAATTACCTTTCCATCAAGTGCACAGTGTTAGAAGTGGAGGTCAGGCTCTACAAGTAGACGCCCTATAATTCACTAATGATCCTTCCGCAGGTTCACCTACGGAAACCTTGTTACGACTTTTA
>73d69f925195e0294ab3f9c5c0f75458
GCCAGAACCAAGAGATCCGTTGTTGAAAGTTTTAATATTTATTATTAACTGAAGTTACTGCTACTACAAAGGGTTTTTGATGTCCTCATGGCGGGCAAGCCCGCCGAGGAAACAAGGGTACTCATAAACAAAGGGTGCTATCTCAATGGGGCCGAAGCCCCACGGTAATGATCCTTCCGCAGGTTCACCTACGGAAACCTTGTTACGACTTTTAC
>e1bbdf960981a5248a8c1b74bb4779e6
AAAGTCGTAACAAGGTTTCCGTAGGTGAACCTGCGGAAGGATCATTAATGATTGACCGTCTGTCGAGCTTGCTCACAGGCACATCATATCCATAACACCTGTGCACTTGTCGGATGGCTTAGTGAAGACCGCAAGGTTGAATCTATCCATCTACTTTACATAACAATTCTGTAACAAATGTAGTCTTATTATAACATAATAAAACTTTCAACAACGGATCTCTTGGCTCT
>dfd0ba021d401919291745f4bceffd15
GTAAAAGTCGTAACAAGGTTTCCGTAGGTGAACCTGCGGAAGGATCATTACCGAGTTCATGCCCTTCGGGGTAGATCTCCCACCCTTTGTATACCATACCTCTGTTGCTTTGGCGGGCCGCCTAGCTACTGGCTTCGGCTGGTAAGTGCCCGCCAGAGGACCCAAAACCCTGAATATTAGTGTCGTCTGAGTAAAAAGTTTAATATTTAAAACTTTCAACAACGGATCTCTTGGCTCTGGC
>f7fb9db10420e033495cd137fce04e8d
CAGGTCGTAACAAGGTTTCCGTAGGTGAACCTGCGGAAGGATCATTACAGTAGTCGCCCGGGTTGCCGCAAGGCCTCCCGGGTAACCTACCACCCTTTGTTTATTACACTTTGTTGCTTTGGCAAGCCTGCCCTCGGGCTGCTGGCTCCGGCCGGCGAGCGCTTGCCAGAGGACCTAAACTCTGTTTGTCTATACTGTCTGAGTACTATATAATAGTTAAAACTTTCAACAACGGATCTCTTGGTTCT
>ae9be488665d6a7a9a8e1283751ea835
AAAGTCGTAACAAGGTTTCCGTAGGTGAACCTGCGGAAGGATCATTAGTGAATTTAAGGGCGTAGACTTCGGTCTGGCCTGAACCCCCACTTTCTAACTCTGTGCATTTTATCGGTGGAGGACTTGGACAAGAGGTAATAACGGACTTCGGTTGAATCCGTATGACCCTCGAATCCTATGTCTTCTACGGCTCATTTTATAACACTAGTCAAAGTATGTAACGAAATATCGAAATAAAAAAAAACTTTCAACAACGGATCTCTTGGCTCT
>bd0d2a85f2fcb5308e2b98023dad27d0
AAAAGTCGTAACAAGGTCTCCGTAGGTGAACCTGCGGAGGGATCATTACCGAGTGAGGGCCTCCGGGTCCGACCTCCAACCCTTTGTGAACACATCCCGTTGCTTCGGGGGCGACCCTGCCGGGCGCCCCCGGAGGACCACTTAAACCATGCATCTCTGCGTCGGAGTTTACGAGTAAATCGAAACAAAACTTTCAACAACGGATCTCTTGGTTCTG
>d1678589ca811fda808a544b98570082
GTAAAAGTCGTAACAAGGTTTCCGTAGGTGAACCTGCGGAAGGATCATTGACACTAATCCAAACCTTTCAAACCTTTCGTGAATTGTTGATTTATAAAAAAAGTGTGTGCTGTTCATATTCACGTATGAGCTTCCCTCTCTTTTTTTCGGGTATTCCACCCAACCAACCTTTTTATTAACCCCATTCAACCCTTTTAACTGAACTTAACATGTTGTTTGTTAACATTTTTATTAACAATCTAAAAACAACTCTTAGCAACGGATGTCTTGGTTCTCGC
>77e7bf5d4e668923320dfe6739a8cc15
GCGAGAACCAAGAGATCCGTTGTCGAAAGTTGTGTATAGTTTGTTGGCCAGTGACGGTCCAACCAAGTTCCACGTTCATACTAACCATTCGAGTTTGTAGCGAAGAAAGACCCCAAGAGAGGCCACAAAAAACTTCTCTGAAGCCTTTCTCCAAGACAGTGCACACGGGTTTGTGGATGTATAGTGGGTGTAGGCGGCCAGGGACACTTTTTGGCGTCCGTATGGCCTGCCCAAATCTTCACTAATGATCCTTCTGCAGGTTCACCTACAGAAACCTTGTTACGACTTTTAC
>4d0440b5382eadb37b5c06fda065d9f2
GTAAAAGTCGTAACAAGGTTTCCGTAGGTGAACCTGCGGAAGGATCATTACTAAATGTTTTCCAACCTCTCCACGTCCTGTGAACTGTTATCAATGTCATGGTGGGCCCTGTGCCTGCGTGTGTGCTGCCTGGAGATTGAAAGATCCCCGGGCTGGCTAGCATGCATGTGCAGACCTGCCATGTTTTGTCCACGTCAATGATATACCCTAGCTCTGAGACTTTAATTAAAAATTAAAGACAACTTTTAGCAACGGATCTCTTGGCTCTCGC
>6acfc295e9c05ea1bb1cb8606ec0724a
GTAAAAGTCGTAACAAGGTTTCTGTAGGTGAACCTGCAGAAGGATCATTAGTGAAGATTTGGGCAGGCCATACGGACGCCAAAAAGTGTCCCTGGCCGCCTACACCCACTATACATCCACAAACCCGTGTGCACTGTCTTGGAGAAAGGCTTCAGAGAAGTTTTTTGTGGCCTCTCTTGGGGTCTTTCTTCGCTACAAACTCGAATGGTTAGTATGAACGTGGAACTTGGTTGGACCGTCACTGGCCAACAAACTATACACAACTTTCGACAACGGATCTCTTGGTTCTCGC
>f5e5364462991ca15d9ffb1207ac896d
CAAGAGCCAAGAGATCCATTGTTAAAAGTTGTCTTTTTAGTTTACAACTGTAACTCTGTCAAACATACAAGCGTCTATGTGGCCAGGCACAAGAATCCGAAAATCCTCACACACTGTCCTAGGCCTGCCCAGTCCGAAGACTAGGCAGGCCCAACCAAAGCTGGCTTTTACACCAGCTCGGGGTAAATATACATGTGCGTTCCCTTGCGGGGCGCCATGTAGCAGATTTGTTAATGATCCTTCCGCAGGTTCACCTACGGAAACCTTGTTACGACTTTTA
>5b662d51dd72112bc9a7f82966980880
GTAAAAGTCGTAACAAGGTTTCCGTAGGTGAACCTGCGGAAGGATCATTACAGTAGTCATCCGGGTTGCCGCAAGGCCTCCCGGGTAACCTACCACCCTTTGTTTATTACACTTTGTTGCTTTGGCAGGCCTGCCCTCGGGCTGCTGGCTCCGGCCGGCGAGCGTCTGCCAGAGGACCTAAACTCTGTTTGTCTATAATGTCTGAGTACTATATAATAGTTAAAACTTTCAACAACGGATCTCTTGGTTCTGGC
>f3b0534ed88cb0436ddf063e25788274
CAGAACCAAGAGATCCGTTGCTGAAAGTTTTGTTTATTTTTGCTTATGCCACTCAGAAGAGACACTAAAAGGCAAGAGTTTGGGTCCCCGGCGGGCGCCTGGTTCCGGGTCACGCCACGTGGACGCGCCGCGGGACGGCCCGCCGAAGCAACATAGGTATGTTCACAGGGGTTTGGGAGTTGTAAACTCAGTAATGATCCCTCCGCTGGTTCACCAACGGAGACCTTGTTACGACTTTT
>e6597485365a3144e4120325a23ea902
AAAAGTCGTAACAAGGTTTCCGTAGGTGAACCTGCGGAAGGATCATTCATAATAAGTGTTCTACTGCACTTTTTAAACAAGTACTCACCTTGTGTGCAATGTTTGCTGTCAAGTCGTTTATTCGTCTTGATAGCACAATACCAACCTTTATTGTAAATTTTTTGTCTGAAGCTATTTCGAATATATAATTCTAAATACAACTTTCAACAACGGATCTCTTGGCTCTC
>9984a71a8f1f9fa649583d7150f7ffbe
GCCAGAACCAAGAGATCCGTTGTTGAAAGTTTTAGTTTATTTAAATATTTTCAGATTTAACATGGTTAAAAGAGTTTGTTAAGGGCTATTGACGAGCACTGGCCAAGAGTTACAAAACTCCCGGCGGTCCGATTAAAGACGGGCCCGCCAAAGCAACATGGTAGTTATACAAAGGGTTGGAGATCGGGCCTGAAAGACCCTAACTCATTAATGATCCTTCCGCAGGTTCACCTACGGAAACCTTGTTACGACTTTTAC
>b59e3ee745abdf384695f55a2a5f6efb
GCGAGAACCAAGAGATCCGTTGTTAAAAGTTTTATTATGTTTATTAAAACTGTTACATTCATAAGACTGGGGTATGTATAAAATTGATGACTCTCATTGCAGACTTGCGTCTTTTATAAGAGCCAAACGGTGCACAGGTGTATGTGGATGTGAAGGGTGAGAGGTCAATGAAGACGCTCTCGATTTAATCACTAGTGATCCTTCCGCAGGTTCACCTACGGAAACCTTGTTACGACTTTTAC
>fca9d8a28a5646a8ebdb1a8713a7666d
AAAAGTCGTAACAAGGTTTCTGTAGGTGAACCTGCAGAAGGATCATTAGTGAAGATTTGGGCAGGCCATACGGACGCCAAAAAGTGTCCCTGGCCGCCTACACCCACTATACATCCACAAACCCGTGTGCACTGTCTTGGAGAAAGGCTTCAGAGAAGTTTTTTGTGGCCTCTCTTGGGGTCTTTCTTCGCTACAAACTCGAATGGTTAGTATGAACGTGGAACTTGGTTGGACCGTCACTGGCCAACAAACTATACACAACTTTCGACAACGGATCTCTTGGTTCTC
>f171f7dbfea54a5dfb5ab8b524df42e5
GTAAAAGTCGTAACAAGGTCTCCGTAGGTGAACCTGCGGAGGGATCATTACCGAGCGAGGGCCCCGGGCCCGACCTCCCACCCCCTGTTGTGTGACCCGTTGCCTCGGGACCGCCCCGCGGGCGGCCCAGAGGACCCCCCAACCCGCGTCCGTACGTCCGAGTCCCGTCCGAACCCACAAAACTTTCAACAACGGATCTCTTGGTTCTGGC
>543cbfebca8a0baf04cbb086e17e1f2d
CCAGAACCAAGAGATCCGTTGTTGAAAGTTGTAATTATTAAGTTTTTTCAGACGCTGATTGAAAATTAAAAAGGTTATAGTTTTGTCCAATCGGCGGGCAAGCCCGCCGAGGAAACAAGAGTGCGCAAAAGACAAGGGTTCAGACAGAGTGCCTGCCGCTCATCAGTAATTAAACTATGCGGACTTACAGCGACTCCCGACCAGTAGCAAGCTACTGAATTGTAATGATCCTTCCGCAGGTTCACCTACGGAAACCTTGTTACGACTTTTA
>4101fd0a1cf958b497ceabc6610ba78a
GTAAAAGTCGTAACAAGGTTTCCGTAGGTGAACCTGCGGAAGGATCATTAGTGAATTATAGGGCGTCTACTTGTAGAGCCTGACCTCCACTTCTAACACTGTGCACTTGATGGCGAGGTAATGAAACTTTCGAGTGAAATTACCTTGCGGCTTCATTTTAAACATTAGTCAAAGTATGTAATGAAATATAAAACAAAAAAAAACTTTCAACAACGGATCTCTTGGCTCTCGC
>d930f179dd780c9deedf2431f144b21f
GCCAGAGCCAAGAGATCCGTTGTTGAAAGTTTTAAATATTAAACTTTTTACTCAGACGACACTAATATTCAGGGTTTTGGGTCCTCTGGCGGGCACTTACCAGCCGAAGCCAGTAGCTAGGCGGCCCGCCAAAGCAACAGAGGTATGGTATACAAAGGGTGGGAGATCTACCCCGAAGGGCATGAACTCGGTAATGATCCTTCCGCAGGTTCACCTACGGAAACCTTGTTACGACTTTTAC
>985eb04abe5fab9f902d8dcbab38891e
AAAGTCGTAACAAGGTCTCCGTAGGTGAACCTGCGGAGGGATCATTACCGAGTGAGGGCCTCCGGGTCCGACCTCCAACCCTTTGTGAACACATCCCGTTGCTTCGGGGGCGACCCTGCCGGGCGCCCCCGGAGGACCACTTAAACCATGCATCTCTGCGTCGGAGTTTACGAGTAAATCGAAACAAAACTTTCAACAACGGATCTCTTGGTTCT
>230e3f629916b6933d7e077d4548f414
TAAAAGTCGTAACAAGGTTTCCGTAGGTGAACCTGCGGAAGGATCATTAGTGAATTATAGGGCGTCTACTTGTAGAGCCTGACCTCCACTTCTAACACTGTGCACTTGATGGAAAGGTAATTAGATTGAGCCTTCGAGCTCATGAAGAGAACCTTTCGGCTTCATTTTAAACATTAGTCAAAGTATGTAAAGAAATTTAAAACAAAAAAAAAACTTTCAACAACGGATCTCTTGGCTCTCG
>bcfd8e97ce8a656e720fef58d28d8c16
AAAGTCGTAACAAGGTTTCCGTAGGTGAACCTGCGGAAGGATCATTACAGTAGTCACCCGGGGCGCCGCAAGGCCTCCCGGGTAACCTACCACCCTTTGTTTATTACACTTTGTTGCTTTGGCAGGCCTGCCCTCGGGCTGCTGGCTCCGGCCGGCGAGCGCTTGCCAGAGGACCTAAACTCTGTTTGTCTATACTGTCTGAGTACTATATAATAGTTAAAACTTTCAACAACGGATCTCTTGGTTCT
>d96a40a4bcc06c3a7c05385be9a32209
AGAGCCAAGAGATCCGTTGTTGAAAGTTTTATTATGTTATAATAAGACTACATTTGTTACAGAATTGTTATGTAAAGTAGATGGATAGATTCAACCTTGCGGTCTTCACTAAGCCATCCGACAAGTGCACAGGTGTTATGGATATGATGTGCCTGTGAGCAAGCTCGACAGACGGTCAATCATTAATGATCCTTCCGCAGGTTCACCTACGGAAACCTTGTTACGACTTT
>a7aef2c4c5b04d946c84932083c2de52
CAGAACCAAGAGATCCGTTGTTGAAAGTTTTAACTATTATATAGTACTCAGACATTATAGACAAACAGAGTTTAGGTCCTCTGGCAGACGCTCGCCGGCCGGAGCCAGCAGCCCGAGGGCAGGCCTGCCAAAGCAACAAAGTGTAATAAACAAAGGGTGGTAGGTTACCCGGGAGGCCTTGCGGCAACCCGGATGACTACTGTAATGATCCTTCCGCAGGTTCACCTACGGAAACCTTGTTACGACTTTT
>853aac95b3e4351f187fa78de45b7cf0
AAAGTCGTAACAAGGTTTCCGTAGGTGAACCTGCGGAAGGATCATTAGTGAATTTAGCGTTTCTCTTAACAGAGCGCGACCCTCCACTTTCTAACTCTGTGAACTATTTGGTCGTTTGGCGCTGAAGTTACTTTTGTAATCGAAGCAATGAACGACGGCTCATTTTAAACACTAGTACAAGTATGTAACGAAATATCGAAATATAAAAAAACTTTCAACAACGGATCTCTTGGCTCT
>8ccb8d5fa39bf448e00009b38836af03
GTAAAAGTCGTAACAAGGTTTCCGTAGGTGAACCTGCGGAAGGATCATTGTCGTGACCCTGACCAAAATAGACCGCGCACGCGTAATCCAACCTGCCGGCGGCGGCATCGTCCGTTGCTCGGCCAAGTCCTTGACAACCTCCTCTTCTCGGAGTGGGGGCTCGAGGTAAAAGAACCCACGGCGCCTAAGGCGTCAAGGAACACTGTGCCTAACTCGGGGACGCGGCCGGCTTGCTGGCCGCCCCTCGTGTTGCAATGCTATTTAATCCACACGACTCTCGGCAACGGATATCTCGGCTCTCGC
>4add89809840fba4fa408a72818b3b64
AGCGTCGTAACAAGGTTTCCGTAGGTGAACCTGCGGAAGGATCATTATTAGAAAATTAAGATTGGCGTTTTAAAGGCAACGCGAATTATTTATACCCTATGTTTATATATTCTCATTTTCTTTGGCAGATATAATAATCTGCTGTATGGTAGTTTTATCTGTCAAAGGACATACTCAACAAACATGTAACATATTGCAGTCTGAATTTTTAAAATATAATATTAAAAACTTTCAACAACGGATCTCTTGGTTCT
>19e5d8ee906a951dc61ab69dbca84f19
AAAGTCGTAACAAGGTTTCCGTAGGTGAACCTGCGGAAGGATCATTAACAAATCTGCTATGCGGCCGAGCTCTCGGGCTTGACGCATATATTTACCCCGAGCCTGGCAGCAATGCCGGCTTTGGTTGGGTGGGATGCAAGTCCTGCTCCGGCTGTGTGAGGGCGCAAGTCCTTGCCAGCCACATAGACGCTTGTATGTTTGACAGAGTTACAGTTGTAAAACTAAAATGACAACTTTTAACAATGGATCTCTTGGCTCT
>7e956f25cd34ad9cfe68fc2a16ce865a
GCGAGAGCCGAGATATCCGTTGCCGAGAGTCGTGTGGATTAAATAGCATTGCAACACGAGGGGCGGCCAGCAAGCCGGCCGCGTCCCCGAGTTAGGCACAGTGTTCCTTGACGCCTTAGGCGCCGTGGGTTCTTTTACCTCGAGCCCCCACTCCGAGAAGAGGAGGTTGTCAAGGACTTGGCCGAGCAACGGACGATGCCGCCGCCGGCAGGTTGGATTACGCGTGCGCGGTCTATTTTGGTCAGGGTCACGACAATGATCCTTCCGCAGGTTCACCTACGGAAACCTTGTTACGACTTTTAC
>5c698de441ea2a3f03427c885e4ec3e3
GAGAGCCAAGAGATCCGTTGTTGAAAGTTGTATTTAGAATTATATATTCGAAATAGCTTCAGACAAAAAATTTACAATAAAGGTTGGTATTGTGCTATCAAGACGAATAAACGACTTGACAGCAAACATTGCACACAAGGTGAGTACTTGTTTAAAAAGTGCAGTAGAACACTTATTATGAATGATCCTTCCGCAGGTTCACCTACGGAAACCTTGTTACGACTTTT
>a22310949f03a5ba312042fa0af26be3
AAAGTCGTAACAAGGTTTCCGTAGGTGAACCTGCGGAAGGATCATTAAAAATGAAGCCGGGAAACCGGTCCTTCTAACCCTTGATTATCTCAATTTGTTGCTTTGGTGGGCCGCGCAAGCACCGGCTTCGGCTGGATCGTGCCCGCCAGAGGACCACAACTCTGTATTAAATGTCGTCTGAGTACTATAAAATAGTTAAAACTTTCAACAACGGATCTCTTGGTTCT
>771233d9b0eb7ee31d1f7795c987eee1
ATGCGAGAGCCAAGAGATCCGTTGTCAAAAGTTGTTTATTATTTAAAATAAAATCAGACATATAGTAGTAGATAGGTTCACCATCCGAAGACAGCTTACCAAAAATGATGCACAGGTGGTTTAGACTCTTGCGAGTCAGGATTTGTAATGATCCAACCGCAGGTTCACCTACGGTTACCTTGTTACGACTTTTACTTCCTCTAAATG
>956e74ef1d19a472b076c54fed790b39
AAAGTCGTAACAAGGTTTCCGTAGGTGAACCTGCGGAAGGATCATCAACAAATCCTAATTAAAACAATATCAACCCAATGTGTGAAATGTTAATAAAAAACCTTAGTCTTGTACTACTGTTTTTTTGGAATTTTTTGGTTTCAATTCATTTTGAAGCCAAATTAATCCTTTATTTCAATTGAACCACTTGATCAACCAAATGATGTCTGATTTTTAACTTTTTAACTTGATTAATTTATTTTAATTATATTAAAAAAAAACTTTAAATTAAAAGACAACTTTTAACGGTGGATCTCTTGGCTCG
>021aec0b4335c9c7f821a25fceab109c
AAAAGTCGTAACAAGGTTTCCGTAGGTGAACCTGCGGAAGGATCATTAGTGAATTATAGGGCGTCTACTTGTAGAGCCTGACCTCCACTTCTAACACTGTGCACTTGATGGCGAGGTAATGGAACTTTCGAGTGAAATTACCTTGCGGCTTCATTTTAAACATTAGTCAAAGTATGTAATGAAATATTAAAACAAAAAAAAACTTTCAACAACGGATCTCTTGGCTCTC
>ddc7d3c0f301fc6b34de49d7b3b3e9b4
AAAGTCGTAACAAGGTTTCCGTAGGTGAACCTGCGGAAGGATCATTACAGTAGTCACCCGGGACGCCGCAAGGCCTCCCGGGTAACCTACCACCCTTTGTTTATTACACTTTGTTGCTTTGGCAAGCCTGCCCTCGGGCTGCTGGCTCCGGCCGGCGAGCGCTTGCCAGAGGACCTAAACTCTGTTTGTCTATACTGTCTGAGTACTATATAATAGTTAAAACTTTCAACAACGGATCTCTTGGTTCT
>ca8fcd1b240ac19d04d7ded7002e2147
AGAGCCTAGAGATCCGTTGCTAAAAGTTTTCTAGTCTTTTGTAATTTACTCGGCATTCAAAGTCAAAGGGTAAAAACGGATGGTGCCCAGACGTAAATCCGCCAAGAAAGTCTTGGAAGATTCAGTGCTTGGACACCAAGTCAAAAGAACAGTTCACACGGGGTAAGATATCTGACTAGCAGCATCTGTTAATGATCCTTCCGCAGGTTCACCTACGGAAACCTTGTTACGACTTT
>26b304337200e6aba53ad32a0182e164
TAAAAGTCATAACAAGGTTTCCGTAGGTGAACCTGCGGAAGGATCATTAATAGTGCCCTCTGATGCAAATCATTGGGTTAGATCTGCTCTCTTTGCAAGAAGAGGGTTTCCATACACACCGTGAACTGTGGCTTCGGCCATCACAAACTGTTAGTAATGAATGTAATATCATAACAAAAACAAAACTTTTAACAACGGATCTCTTGGCTCTCG
>6775288e01ab4e488f91c784fd1d9244
GTAAAAGTCGTAACAAGGTTTCCGTAGGTGAACCTGCGGAAGGATCATTAATGAGTTAGGGTCTCCGAGGCCCGACCTCCAACCCTTTGTATAATTATTACGTTGCTTTGACGGGCCCGTCTTCAACTGGACCGCCGGGGTTTAACCTCTGGCCAGCGCCTGTCAATAGCCTTCAATAAATTCTTTTAACCATGTTAAATCTGAAAATAGTTAAATAAACTAAAACTTTCAACAACGGATCTCTTGGTTCTGGC
>d77abe5ae1480799c6c4876b3d4a994e
GCGAGAACCAAGAGATCCGTTGTTAAAAGTTTTATTATGTTTATTAAAACTGTTACATTCATAAGACTGGGGTATGTATAAAATTGATGACTCTCTTTGCAGACTTGCGTCTTTTAAAAGAGCCAAACGGTGCACAGGTGTATGTGGATGTGAAGGGTGAGAGGTCAATGAAGACACTCTCAATTTAATCACTAGTGATCCTTCCGCAGGTTCACCTACGGAAACCTTGTTACGACTTTTAC
>270a40c08aefc69a33419ea6934a2fdd
AAAAGTCGTAACAAGGTTTCCGTAGGTGAACCTGCGGAAGGATCATTAGCACGTATCCTACGTATTAATAAACACCTGTGAACTTCATAACTTAAACGTCGTGACCGGTAAAACGGAAGCGATGACCTCGGGTCACACCCTCTTTTTGGAGGTGACCTTATAACTCTTTTTTAAACAACCCATTCCAAATTTGATCGACTTTAATCTCACTAGGCTTGAAACCCTAGCGATATTACGAAATTCCGAACAACTCTTAGCAACGGATATCTTGGTTCTC
>a1e38bede422785616e63f292c862d9e
GTAAAAGTCGTAACAAGGTTTCCGTAGGTGAACCTGCGGAAGGATCATTATCGAGATAGGGTCCCCTTGGGGCCCGACCCTCCACCCGATGCGTACCGACCCTTTTGTTGCTTTGACGGGCCGCGGGGCCCTTGTGGTTCCCCGTTGGCGCCAGCGGACGAGCGCCTGTCAAGGACCCCTTATAAACCCCCGTGATCTATGCCGTCCGAGCCATGATAAAATCAATCAAAACTTTCAACAACGGATCTCTTGGTTCTGGC
>e0071facdad4edfeb7d7b286fc2400d8
AGAGCCAAGAGATCCGTTGTTGAAAGTTTTTTTTTATTTCGATATTTCGTTACATACTTTGACTAGTGTTATAAAATGAGCCGTAGAAGACATAGGATTCGAGGGTCATACGGATTCAACCGAAGTCCGTTATTACCTCTTGTCCAAGTCCTCCACCGATAAAATGCACAGAGTTAGAAAGTGGGGGTTCAGGCCAGACCGAAGTCTACGCCCTTAAATTCACTAATGATCCTTCCGCAGGTTCACCTACGGAAACCTTGTTACGACTTT
>c897903537e42ec3d2af867024894b57
GTAAAAGTCGTAACAAGGTTTCCGTAGGTGAACCTGCGGAAGGATCACTAGTGATTAAATTGAGAGTGTCTTCATTGACCTCTCACCCTTCACATCCACATACACCTGTGCACCGTTTGGCTCTTTTAAAAGACGCAAGTCTGCAAAGAGAGTCATCAATTTTATACATACCCCAGTCTTATGAATGTAACAGTTTTAATAAACATAATAAAACTTTTAACAACGGATCTCTTGGTTCTCGC
>a3c722d75ddb572d392e5a0bdc6d0c83
AGAGCCAAGAGATCCGTTGTCAAAAGTTGTTTATATTTTATTATAATTTCAGACAAGTTTTTATGGTTTGTTATAAAGTTTGGCAGCCTATACCAAGGTATAAACTACCAAAAGACAATATAGTGCACAAGAGGTGAATTTGGCTATGAGGACTCCTTTCGGTATCAACTCATAGACCAAGTATCAGTAATGATCCAACCGCAGGTTCACCTACGGTTACCTTGTTACGACTTT
>26caf36f638ef82adb5b2bad4597b49f
GTAAAAGTCGTAACAAGGTTTCCGTAGGTGAACCTGCGGAAGGATCATTCACAAACGATTCTATATCGACCCATTTGTGTGAACCAACCCTTTATATATATTGAATTGTGGACCAAAGTAAGCTTGCTTGCTTCCATGATTTATATTTTAACCCATTGTGAACCAAGTCAGTTCTGACCGAATGAACGTTAGTCGTTTGGTCTGGCAGCATCGCAAGATGTCTCCAGTTAAACATAACAACTTAATGACAACTTTAAACGGTGGATCTCTTGGCTCGTGC
>c362d289f90ee141bcf24eb513bd0764
TAAAAGTCGTAACAAGGTTTCCGTAGGTGAACCTGCGGAAGGATCATTAACAAATCTGCTACATGGCGCCCCGCAAGGGAACGCACATGTATATTTACCCCGAGCTGGTGTAAAAGCCAGCTTTGGTTGGGCCTGCCTAGTCTTCGGACTGGGCAGGCCTAGGACAGTGTGTGAGGATTTTCGGATTCTTGTGCCTGGCCACATAGACGCTTGTATGTTTGACAGAGTTACAGTTGTAAACTAAAAAGACAACTTTTAACAATGGATCTCTTGGCTCTTG
>d2e4cad5acef137aa52147a0856ef35b
TAAAAGTCGTAACAAGGTTTCCGTAGGTGAACCTGCGGAAGGATCATTGACACTAATCCAAACCTTTCAAACCTTTCGTGAATTGTTGATTTATAAAAAAAGTGTGTGCTGTTCATATTCACGTATGAGCTTCCCTCTCTTTTTTTCGGGTATTCCACCCAACCAACCTTTTTATTAACCCCATTCAACCCTTTTAACTGAACTTAACATGTTGTTTGTTAACATTTTTATTAACAATCTAAAAACAACTCTTAGCAACGGATGTCTTGGTTCTCG
>0346858f01c25c9a5fa89a7bc7f1fdf8
AAAAGTCGTAACAAGGTTTCCGTAGGTGAACCTGCGGAAGGATCATTAACGAGAGAAGGGGCCTTTCGCCCCGGGGGCTCCGGCCGCCACTCTTCAACCCGTGCCTATATACCTTCGTTGCTTTGGCGGGCCTCGGGCCCTCCCGACGCCGGCCTCGGGGCGACCCTGGGCTTGCGAGCGCCCGCCGGAGGCTTTGCAAACTCCTTTCAGTGCCGTCTGAGGAAAAAGCTCAATAGTAAAAACTTTCAACAACGGATCTCTTGGTTCCG
>a608f8f999c2af715b310e1e0e6c716a
AAAGTCGTAACAAGGTTTCCGTAGGTGAACCTGCGGAAGGATCATTAACAAATCATGTTGCTACCAGAGCTGGTCCCCTTTGGGGATCGTTCTGGTATGCATATATAAACCCGAACCCGTGCGGTAAAATGCCGGGCAAGGTGTTATCGGCCTGGTGCGAGCCATGGCTGGTAGCGGAGAGGCGCAAGCCGATCCACATAGACGCTTGTATATGTTTGACAGAGTATGATACACTTATTAAAATGACAACTTTTAACAATGGATCTCTTGGCTCT
>2f7400ecab30fb71e38bc6e1f955b7a6
AGAACCAAGAGATCCGTTGTTGAAAGTTTTGTTTCGATTTACTCGTAAACTCCGACGCAGAGATGCATGGTTTAAGTGGTCCTCCGGGGGCGCCCGGCAGGGTCGCCCCCGAAGCAACGGGATGTGTTCACAAAGGGTTGGAGGTCGGACCCGGAGGCCCTCACTCGGTAATGATCCCTCCGCAGGTTCACCTACGGAGACCTTGTTACGACTTT
>0d5c581b3b879cd5b990e35477884a3e
CAAGAGCCTAGAGATCCGTTGCTAAAAGTTTTCTAGTCTTTTGTAATTTACTCGGCATTCAAAGTCAAAGGGTAAAAACGGATGGTGCCCAGACGTAAATCCGCCAAGAAAGTCTTGGAAGATTCAGTGCTTGGACACCAAGTCAAAAGAACAGTTCACACGGGGTAAGATATCTGACTAGCAGCATCTGTTAATGATCCTTCCGCAGGTTCACCTACGGAAACCTTGTTACGACTTTTA
>5ed6e73015575573868780a85bc8167f
TAAAAGTCGTAACAAGGTTTCCGTAGGTGAACCTGCGGAAGGATCATTCATAATAAGTGTTTTACTGCACTTTTTAAAAATAGTACTCACCTTGTGTGCAATGTTGTGTATAGTAATATACACCTACACCAACCTATAACCTTGAACCACTTTGTCTGAAAAACTATTATGAATACTTAATTCAAAATACAACTTTCAACAACGGATCTCTTGGCTCTCG
>4ac6deae73191fb16714cde059f1f090
GTAAAAGTCGTAACAAGGTTTCCGTAGGTGAACCTGCGGAAGGATCATTCATAATAAGTGTTTTACTGCACTTTTTAAAAATAGTACTCACCTTGTGTGCAATGTTGTGTTTCTTTTCGGAGAAACACCTACACCAACCTATAACCTTGAACCACTTTGTCTGAAAAACTATTATGAATACTTAATTCAAAATACAACTTTCAACAACGGATCTCTTGGCTCTCGC
>92e9b2c755e160dd924863e9d84468e7
CAGAACCAAGAGATCCGTTGTTGAAAGTTTTAAATTGATATTCTCCCGTGGGACGTCAGGGTTGAAGAGTTTAAAAAGAAATTTTTAACCTGTCCCGGCAGCGACGCCGGGGCAGTGAAATAGACAAGGGTTGGAGATGGGGCCCAGAGGACCCTGACTCGATAATGATCCTTCCGCAGGTTCACCTACGGAAACCTTGTTACGACTTTT
>6c834baf173a1a4f11eec1f197971a8f
TAAAAGTCGTAACAAGGTTTCCGTAGGTGAACCTGCGGAAGGATCATTACTGAGCGCGAGGCCCCGCAGCGCGCACGCGCTGCGGCGGTTGACCCTCCACCCGTGTGAACTCTTATCTGTTGCTTTGGCGGGCCGGGCTCGACCTGCCGGCTCCGGCTGGCGAGTGCCCGTCAGAGAAGCCCCAACTCGTGCTGTGAGTGTTGTCTGAGGAAATGTGGAATTAGTAAAACTTTCAACAACGGATCTCTTGGCTCTGG
>83006a633cb8c360babeb2d221099a3c
GCCAGAACCAAGAGATCCGTTGTTGAAAGTTTTAACTATTATATAGTACTCAGACATTATAGACAAACAGAGTTTAGGTCCTCTGGCAGACGCTCGCCGGCCGGAGCCAGCAGCCCGAGGGCAGGCCTGCCAAAGCAACAAAGTGTAATAAACAAAGGGTGGTAGGTTACCCGGGAGGCCTTGCGGCAACCCGGATGACTACTGTAATGATCCTTCCGCAGGTTCACCTACGGAAACCTTGTTACGACTTTTAC
>b439eb6051700ff4c4077c170f90dcc1
AAAAGTCGTAACAAGGTTTCCGTAGGTGAACCTGCGGAAGGATCATTGTCGTGACCCTGACCAAAATAGACCGCGCACGCGTAATCCAACCTGCCGGCGGCGGCATCGTCCGTTGCTCGGCCAAGTCCTTGACAACCTCCTCTTCTCGGAGTGGGGGCTCGAGGTAAAAGAACCCACGGCGCCTAAGGCGTCAAGGAACACTGTGCCTAACTCGGGGACGCGGCCGGCTTGCTGGCCGCCCCTCGTGTTGCAATGCTATTTAATCCACACGACTCTCGGCAACGGATATCTCGGCTCTC
>26576f098367bd0af08892e76dcee7b1
GAGAACCAAGAGATCCGTTGTCGAAAGTTGTGTATAGTTTGTTGGCCAGTGACGGTCCAACCAAGTTCCACGTTCATACTAACCATTCGAGTTTGTAGCGAAGAAAGACCCCAAGAGAGGCCACAAAAAACTTCTCTGAAGCCTTTCTCCAAGACAGTGCACACGGGTTTGTGGATGTATAGTGGGTGTAGGCGGCCAGGGACACTTTTTGGCGTCCGTATGGCCTGCCCAAATCTTCACTAATGATCCTTCTGCAGGTTCACCTACAGAAACCTTGTTACGACTTTT
>1f5a3e4a92056992dde4a262f8aa02d0
AGAGCCAAGAGATCCATTGTTAAAAGTTGTCATTTTAATAAGTGTATCATACTCTGTCAAACATATACAAGCGTCTATGTGGATCGGCTTGCGCCTCTCCGCTACCAGCCATGGCTCGCACCAGGCCGATAACACCTTGCCCGGCATTTTACCGCACGGGTTCGGGTTTATATATGCATACCAGAACGATCCCCAAAGGGGACCAGCTCTGGTAGCAACATGATTTGTTAATGATCCTTCCGCAGGTTCACCTACGGAAACCTTGTTACGACTTT
>311bbb27d483751ce697fb5b48d6673c
GTAAAAGTCGTAACAAGGTTTCCGTAGGTGAACCTGCGGAAGGATCATTCATAATAAGTGTTTTACTGCACTTTTTAAACAAGTACTCACCTTGTGTGCAATGTTTGCTCCGAGTCGTTTTTTCGACTCGGCAGCATAATACCAACCTTTTATTGTAAATTTTTTGTCTGAAGCTATTTCGAATATATAATTCTAAATACAACTTTCAACAACGGATCTCTTGGCTCTCGC
>07cd4c683c7c7c9a8e194aebeb0a16b5
CGAGAGCCAAGAGATCCGTTGTTAAAAGTTTTGTTTTTGTTATGATATTACATTCATTACTAACAGTTTGTGATGGCCGAAGCCACAGTTCACGGTGTGTATGGAAACCCTCTTCTTGCAAAGAGAGCAGATCTAACCCAATGATTTGCATCAGAGGGCACTATTAATGATCCTTCCGCAGGTTCACCTACGGAAACCTTGTTATGACTTTTA
>2968b04c3cddb16147b78d51a37ba3fb
AGAGCCAAGAGATCCGTTGTTGAAAGTTTTTTTATATTTCGATATTTCGTTACATACTTGTACTAGTGTTTAAAATGAGCCGTCGTTCATTGCTTCGATTACAAAAGTAACTTCAGCGCCAAACGACCAAATAGTTCACAGAGTTAGAAAGTGGAGGGTCGCGCTCTGTTAAGAGAAACGCTAAATTCACTAATGATCCTTCCGCAGGTTCACCTACGGAAACCTTGTTACGACTTT
>45463cfc3f9ecb79302a8c7fd32b606e
CAGAACCAAGAGATCCGTTGTTGAAAGTTTTGTTTCGATTTACTCGTAAACTCCGACGCAGAGATGCATGGTTTAAGTGGTCCTCCGGGGGCGCCCGGCAGGGTCGCCCCCGAAGCAACGGGATGTGTTCACAAAGGGTTGGAGGTCGGACCCGGAGGCCCTCACTCGGTAATGATCCCTCCGCAGGTTCACCTACGGAGACCTTGTTACGACTTTT
>ae9a4f2a9593ad51e94a41871ddd42a5
GAGAACCAAGAGATCCGTTGTCAAAAGTTGTTTAAAGATTAATTTCTTTATGTAAGACTAGATGGAAATGAGTTTAATAACCAGCGAGTGCCAAAGAACAAGAGCTCTTTAACGGTCTCACTGGATAAAAGACAGGGGTTGCGTAAGGGAGCTTCCTTGAAGGGTCACTCCCCACACCCTCAGCCCACCCTCCGAAGAAGTTGAGCTGAGAATCAATGAAAATTCATTAATGATCCAACCGCAGGTTCACCTACGGTTACCTTGTTACGACTTTT
>9deddfeffc516d573d14ef66062b9645
TAAAAGTCGTAACAAGGTTTCCGTAGGTGAACCTGCGGAAGGATCATTAGTGAATTTAGAGTGTGCTTCGCGCAGCTTGACCCCCACTTTCTTAACTCTGTGCACCATTTTGGCATTACGAAAAAATATTTAGAGTTTATCTTTTTATATATAAATAAGTTTTGCGGCTCACTTTAAACACTAGTCAAAGAATGTAAAATGAAATATATAAATATAAAAAAACTTTCAACAACGGATCTCTTGGCTCTCG
>3fe1fb9e350e375a2cf5e362d0979ba0
AAAAGTCGTAACAAGGTTTCCGTAGGTGAACCTGCGGAAGGATCATTATCGAGTCAGGGTCCTCTGGGCCCCATCTCCAACCCTTGTCTATTTCACTGCCCCGGCGTCGCTGCCGGGACAGGTTAAAAATTTCTTTTTAAACTCTTCAACCCTGACGTCCCACGGGAGAATATCAATTTAAAACTTTCAACAACGGATCTCTTGGTTCTG
>fa2e604c4884910aa43b040bd5d77bbb
GTAAAAGTCGTAACAAGGTTTCCGTAGGTGAACCTGCGGAAGGATCATTACAAATCCATCCACGTCTCATACCCGAGACCACGTTGAAATGTTCCCCAGACCAGGGTGCGCGCCGTTTCCACGCTTTTAGGCTCCTCGGGGCCTGCCTGCTGGGACGATGCCGAGCCCTGGCCTGGGCTGTTAAACTAGTGTTACGTTGTTGCTCAAATGTATCTTGATTTCAATCAAACGAAAACTTGTACAACTTATAACAATGGATCTCTAGGCTCTTGC
>84cb70bbd3fe97787b754395e199fcba
AGAGCCAAGAGATCCGTTGTTAAAAGTTGTATTTTTTAGAGCCTTTCGGCCAATGAACATTCGTTTTACAAGAAGGGTTTGTATGAGAAAGGACAGACCAGCCGTTAAGCCGTTCTCTCCTTTCAAAGTGCACAGGTGTGTATGGATTAAGGGAAAAGCGCATAGAACAAGTTCTAGCATCAATTTTCCCAAGTTTCATTAATGATCCTTCCGCAGGTTCACCTACGGAAACCTTGTTACGACTTT
>6c74a45b1f91596654fc81ccdb64c40d
GAGAGCCGAGATATCCGTTGCCGAGAGTCGTGTGGATTAAATAGCATTGCAACACGAGGGGCGGCCAGCAAGCCGGCCGCGTCCCCGAGTTAGGCACAGTGTTCCTTGACGCCTTAGGCGCCGTGGGTTCTTTTACCTCGAGCCCCCACTCCGAGAAGAGGAGGTTGTCAAGGACTTGGCCGAGCAACGGACGATGCCGCCGCCGGCAGGTTGGATTACGCGTGCGCGGTCTATTTTGGTCAGGGTCACGACAATGATCCTTCCGCAGGTTCACCTACGGAAACCTTGTTACGACTTTT
>427af23bc56bf8251ccd5aec92aab496
AAAAGTCGTAACAAGGTTTCCGTAGGTGAACCTGCGGAAGGATCATTAACAAATCATGGTAGCACACTGGAGCAATCTGGTGTTGCCCACATAAACCCGAACCTGTGCAGCAATGCCAGGCGAGGTGTAGGGCCTTCGGGTCCTGCGGTGAAGAGTTATGGAGAGTTTTCTCTGCATGGCCTGGATCCACATAGACGCTTTTTTAGTTTGACAGTATCAGTTGACACAATCAAAATGACAACTTTTAACAATGGATCTCTTGGCTCTT
>1c883eef0df75a0aea65ea9af793396f
TAAAAGTCGTAACAAGGTTTCCGTAGGTGAACCTGCGGAAGGATCATTAACAGATGCTGCTAGTCAGATATCTTACCCCGTGTGAACTGTTCTTTTGACTTGGTGTCCAAGCACTGAATCTTCCAAGACTTTCTTGGCGGATTTACGTCTGGGCACCATCCGTTTTTACCCTTTGACTTTGAATGCCGAGTAAATTACAAAAGACTAGAAAACTTTTAGCAACGGATCTCTAGGCTCTTG
>bf010aa46a0293e553d2f5857cab2876
CGAGAGCCAAGAGATCCGTTGTCAAAAGTTGTTTCAAATTTTGTTATTTGATTAAGACGGGTTTTATAAAGGGGTTAAGAATGCGGTAGCATCTATAGTTCACAAGTGTTGACCAAGGCCGTTTTGAGGCGGCCCCAGTATTAAGAGCTCTAAAGCCCAAAATTGTTAATGATCCAACCGCAGGTTCACCTACGGTTACCTTGTTACGACTTTTA
>5c2be65eaf2bb7580cd8e40ae19fd147
GCGAGAGCCAAGAGATCCGTTGTCAAAAGTTGTTTCAAATTTTGTTATTTGATTAAGACGGGTTTTATAAAGGGGTTAAGAATGCGGTAGCATCTATAGTTCACAAGTGTTGACCAAGGCCGTTTTGAGGCGGCCCCAGTATTAAGAGCTCTAAAGCCCAAAATTGTTAATGATCCAACCGCAGGTTCACCTACGGTTACCTTGTTACGACTTTTAC
>9daeee9496a2315890b3e4708179153c
GAGAGCCAAGAGATCCGTTGTCAAAAGTTGTTTCAACATTAAGTTGTTTTAATTAAGACTAGTTTCTAAAGACTTTAATGTTTGGGTAGTCAACTGAAGGGTTTTAAACCAACAGTAACAGACTAAAACAATTCACAGTGGTAAGCGAGGGAGACTCGTCAAAGTTTTTCAACTCTTCAGACTCTCACCCCTAATTAGACTCAACTTCACGTTGAGCCATAATTCATTAATGATCCAACCGCAGGTTCACCTACGGTTACCTTGTTACGACTTTT
>d9b2121a4369677bebbc53e011786bb4
AGAGCCAAGAGATCCATTGTTAAAAGTTTTGGTTATTTACTTTTTCTTGGTAAAAGTCATGATTTAATGTTTATTTGCACACCGAAGCATGCTACCATCTCCCTTTCAGGAGTGGGCCTAGTGCCACGCAAAGTGGCGTGTTACACGACAAACTGCACAATATTACTCGTACAACTCACCCCACTAACACCCCAACTCTCACGCACACAATCTTAATTTTGTAATGATCCTTCCGCAGGTTCACCTACGGAAACCTTGTTACGACGCT
>4abcc5ccfdfdcdcb572ff53081d5696c
AAAGTCGTAACAAGGTTTCCGTAGGTGAACCTGCGGAAGGATCATTAATGAAACTTGGGAAAATTGATGCTAGAACTTGTTCTATGCGCTTTTCCCTTAATCCATACACACCTGTGCACTTTGAAAGGAGAGAACGGCTTAACGGCTGGTCTGTCCTTTCTCATACAAACCCTTCTTGTAAAACGAATGTTCATTGGCCGAAAGGCTCTAAAAAATACAACTTTTAACAACGGATCTCTTGGCTCT
>5c11cb94768e3404ff5c3f9a1709fa5b
AGAACCAAGAGATCCGTTGTTGAAAGTTTTGCTTTATTTTTGTTTTAGACATCAGACGGCTTGGATCAAACGAGTTTTGGTGGGCTTCTGGCGGGCACGCACCGGGCAAGGCCCGGCATGAGCATGACCCCAAGGCCCGCCAAAGCAACAAAGGTATAATATTCACGGGGTTGAGAGGCGGGGGCGAACCCCCTGGAGCGCGGAGCCCCACTCTGTAATGATCCTTCCGCAGGTTCACCTACGGAAACCTTGTTACGACTTT
>45a1aeac18cf883788052f413590292a
TAAAAGTCGTAACAAGGTTTCCGTAGGTGAACCTGCGGAAGGATCATTATTGAATTATAAGGCTCGGATTGTGCTGGCCTCTCGGGGCATGTGCACGTCTCTGCCCGTTAATCCCAACCCACCCCTGTGAACCGACCGTGTGAGGCAGCTCTGTAATGGAGCCGTCCCATGCTTTATCATAAACCCTGTATGTCATCAGAATGTAAATCCTATATCCTCGCCTTAAAACCGCGTCGGTAAAAAAAATTAATACAACTTTCAACAACGGATCTCTTGGCTCTGG
>7158fee97c8d3808abeb9285fc68aa2f
GCCAGAACCAAGAGATCCGTTGTTGAAAGTTTTGATTGATTTTATCATGGCTCGGACGGCATAGATCACGGGGGTTTATAAGGGGTCCTTGACAGGCGCTCGTCCGCTGGCGCCAACGGGGAACCACAAGGGCCCCGCGGCCCGTCAAAGCAACAAAAGGGTCGGTACGCATCGGGTGGAGGGTCGGGCCCCAAGGGGACCCTATCTCGATAATGATCCTTCCGCAGGTTCACCTACGGAAACCTTGTTACGACTTTTAC
>f4dcfb2e959c237251980a91ad16db75
GTAAAAGTCGTAACAAGGTTTCCGTAGGTGAACCTGCGGAAGGATCATTAAAGAGACGTTGCCCTTCGGGGTATACCTCCCACCCTTTGTTTATACATACCTTTGTTGCTTTGGCAGGCCCGGCTTCGGCCCACCGGCTCCGGCTGGTCCGCGTCTGCCAGAGGAAACCCAAACTCTGTTTGTTAATATTGTCTGAGTACTATATAATAGTTAAAACTTTCAACAACGGATCTCTTGGTTCTGGC
>26395e866c1af4d7ec522d4f7b182c6e
TAAAAGTCGTAACAAGGTTTCCGTAGGTGAACCTGCGGAAGGATCATTACAATTCAGTAGCTTGCTACTGGTCGGGAGTCGCTGTAAGTCCGCATAGTTTAATTACTGATGAGCGGCAGGCACTCTGTCTGAACCCTTGTCTTTTGCGCACTCTTGTTTCCTCGGCGGGCTTGCCCGCCGATTGGACAAAACTATAACCTTTTTAATTTTCAATCAGCGTCTGAAAAAACTTAATAATTACAACTTTCAACAACGGATCTCTTGGTTCTGG
>cd581f0e165d8b5b50a1bd110fdc4587
AGAGCCAAGAGATCCGTTGTCAAAAGTTGTTTCAAATTTTGTTATTTGATTAAGACGGGTTTTATAAAGGGGTTAAGAATGCGGTAGCATCTATAGTTCACAAGTGTTGACCAAGGCCGTTTTGAGGCGGCCCCAGTATTAAGAGCTCTAAAGCCCAAAATTGTTAATGATCCAACCGCAGGTTCACCTACGGTTACCTTGTTACGACTTT
>56f146cceef49626bacab22d68b2899e
GTAAAAGTCGTAACAAGGTTTCCGTAGGTGAACCTGCGGAAGGATCATTCATAATAAGTGTTTTACTGCACTTTTTAAAAAATAGTACTCACCTTGTGTGCAATGTTGTGTGGTATTTTTCACCTCGTGTGAGAATTTCACACCTACACCAACCTATAACCTTGAACCACTTTGTCTGAAAAACTATTATGAATACTTAATTCAAAATACAACTTTCAACAACGGATCTCTTGGCTCTCGC
>ba1131161cf64ee78536b4ae8c4ca72f
AAGTAAAAGTCGTAACAAGGTAACCGTAGGTGAACCTGCGGTTGGATCATTACAAATCCTGACTCGCAAGAGTCTAAACCACCTGTGCATCATTTTTGGTAAGCTGTCTTCGGATGGTGAACCTATCTACTACTATATGTCTGATTTTATTTTAAATAATAAACAACTTTTGACAACGGATCTCTTGGCTCTCGCATCGATGAAGAA
>fa0fc2ac5c7cfd1cfb67599f41dbf997
GCGAGAGCCAAGAGATCCGTTGTTGAAAGTTGTATTTTGAATTAAGTATTCATAATAGTTTTTCAGACAAAGTGGTTCAAGGTTATAGGTTGGTGTAGGTGTTTCTCCGAAAAGAAACACAACATTGCACACAAGGTGAGTACTATTTTTAAAAAGTGCAGTAAAACACTTATTATGAATGATCCTTCCGCAGGTTCACCTACGGAAACCTTGTTACGACTTTTAC
>315abe29f76ff0791ddda69b7651003c
AAAGTCGTAACAAGGTTTCCGTAGGTGAACCTGCGGAAGGATCACTAGTGATTAAATCGAGAGCGTCTTCATTGACCTCTCACCCTTCACATCCACATACACCTGTGCACCGTTTGGCTCTTATAAAAGACGCAAGTCTGCAATGAGAGTCATCAATTTTATACATACCCCAGTCTTATGAATGTAACAGTTTTAATAAACATAATAAAACTTTTAACAACGGATCTCTTGGTTCT
>c67518ec58fdb0a5b390ddf1ed6d9d59
GCCAGAACCAAGAGATCCGTTGTTGAAAGTTTTGTGGGTTCGGACGGGACTCGGACGTACGGACGCGGGTTGGGGGGTCCTCTGGGCCGCCCGCGGGGCGGTCCCGAGGCAACGGGTCACACAACAGGGGGTGGGAGGTCGGGCCCGGGGCCCTCGCTCGGTAATGATCCCTCCGCAGGTTCACCTACGGAGACCTTGTTACGACTTTTAC
>3d86d8cab878edf9a5958096a342e28e
GTAAAAGTCGTAACAAGGTTTCCGTAGGTGAACCTGCGGAAGGATCATTAGTGAATATTAGCGCATCTACTTGTAGAGCGTGACCTCCACTTTCTAACTCTGTGCATTTATTGGCGGAAGAGACTTGAGCAATCGAGTCTTCTTCTCGCGGCTCATTTTATAACACTAGTTAAAGTATGTAACGAAATATCGAAACAAAAAAAACTTTCAACAACGGATCTCTTGGCTTGCGC
>39d2ea59082678961f0311add58bf6fb
GTAAAAGTCGTAACAAGGTTTCCGTAGGTGAACCTGCGGAAGGATCATTAGTGAATTTTAGCGCACTTGTTTATTCAAGGCGTGACCTCCACTCTTATAACATTGTGCACTCATTGGCGGATGATGACTCAACTGATAGGCAACTTGAAGTGAAATTATTGTCTGCGGCTCACTTTTAAACATTTAGTTAAAGTATGTATACAAAATATCGAAAAAATAAAAAAACTTTCAACAACGGATCTCTTGGCTCTCGC
>c7a3d7951e67f5d4dcf7d7ac22639b82
AAAAGTCGTAACAAGGTAACCGTAGGTGAACCTGCGGTTGGATCATTAATGAATTTTCATTGATTCTCAGCTCAACTTCTTCGGAGGGTGGGCTGAGGGTGTGGGGAGTGACCCTTCAAGGAAGCTCCCTTACGCAACCCCTGTCTTTTATCCAGTGAGACCGTTAAAGAGCTCTTGTTCTTTGGCACTCGCTGGTTATTAAACTCATTTCCATCTAGTCTTACATAAAGAAATTAATCTTTAAACAACTTTTGACAACGGATCTCTTGGTTCTC
>3c6f59818cf78313fdee2a11183d0c68
CCAGAGCCAAGAGATCCGTTGTTGAAAGTTGTATTAATTTTTTTTACCGACGCGGTTTTAAGGCGAGGATATAGGATTTACATTCTGATGACATACAGGGTTTATGATAAAGCATGGGACGGCTCCATTACAGAGCTGCCTCACACGGTCGGTTCACAGGGGTGGGTTGGGATTAACGGGCAGAGACGTGCACATGCCCCGAGAGGCCAGCACAATCCGAGCCTTATAATTCAATAATGATCCTTCCGCAGGTTCACCTACGGAAACCTTGTTACGACTTTTA
>18f3c396a5b1392f52be8876bc6afcbf
AGAACCAAGAGATCCGTTGTTAAAAGTTTTATTATGTTTATTAAAACTGTTACATTCATAAGACTGGGGTATGTATAAAATTGATGACTCTCATTGCAGACTTGCGTCTTTTATAAGAGCCAAACGGTGCACAGGTGTATGTGGATGTGAAGGGTGAGAGGTCAATGAAGACGCTCTCGATTTAATCACTAGTGATCCTTCCGCAGGTTCACCTACGGAAACCTTGTTACGACTTT
>1d8adf1b33a77b99335837e8c1abb474
AAGAGCCAAGAGATCCATTGTTAAAAGTTGTCATTTTGATTGTGTCAACTGATACTGTCAAACTAAAAAAGCGTCTATGTGGATCCAGGCCATGCAGAGAAAACTCTCCATAACTCTTCACCGCAGGACCCGAAGGCCCTACACCTCGCCTGGCATTGCTGCACAGGTTCGGGTTTATGTGGGCAACACCAGATTGCTCCAGTGTGCTACCATGATTTGTTAATGATCCTTCCGCAGGTTCACCTACGGAAACCTTGTTACGACTTTT
>3a85a8f627b08d5ff72965c28f17889b
TAAAAGTCGTAACAAGGTTTCCGTAGGTGAACCTGCGGAAGGATCATTACTGAAAAGGGACTCCGGTCCCTGGGACAAGCCCCCGCCGAGCCCCTGGGCTCCCCGGGTGGTGACACCCCTTACCCTTTGTTTACCTTACCTCTGTTGCTTTGGCAAGGCTCCTGCCCGGGTGGTTCCGGGCTTCAGCTCTGCCAGAGGGCCCCAACTCGTGGATAGTTTATGTTTGTCTGAGTACGATATAATCGTTTACAACTTTTAACAATGGATCTCTTGGCTCTGG
>348890d84a837e9af47c1d6d1a1bb008
CAGGTCGTAACAAGGTCTCCGTTGGTGAACCAGCGGAGGGATCATTACCGAGTTGCCCCAACTCCCAAACCCCGTGCGAACCGTACCACACGCGTTGCCTCGGCGGGACCGCCCCGGCGCCCACGGCGGCCCGGACCAAGGCGCCCGCCGGAGGACCCCCCAGACTCTCCTGTCGCAGCGGCATTGCTCTCCGAGTCCAGGCGAAATAGCAAATGAATCAAAACTTTCAACAACGGATCTCTTGGCTCT
>58305339b1b052ae0faa3f0d89aae278
GCGCAAGCCAAGAGATCCGTTGTTGAAAGTTTTTTTTGTTTCGATATTTCGTTACATACTTTAACTAGTGTTATAAAATGAGCCGCGAGAAGAAGACTCGATTGCTCAAGTCTCTTCCGCCAATAAATGCACAGAGTTAGAAAGTGGAGGTCACGCTCTACAAGTAGATGCGCTAATATTCACTAATGATCCTTCCGCAGGTTCACCTACGGAAACCTTGTTACGACTTTTAC
>975b1f1bf32b0a564857d43b60a144e9
CCAGAGCCAAGAGATCCGTTGTTGAAAGTTTTACTAATTCCACATTTCCTCAGACAACACTCACAGCACGAGTTGGGGCTTCTCTGACGGGCACTCGCCAGCCGGAGCCGGCAGGTCGAGCCCGGCCCGCCAAAGCAACAGATAAGAGTTCACACGGGTGGAGGGTCAACCGCCGCAGCGCGTGCGCGCTGCGGGGCCTCGCGCTCAGTAATGATCCTTCCGCAGGTTCACCTACGGAAACCTTGTTACGACTTTTA
>61afc63e3ff3a06d2913e66aadf19d7b
GCGAGAGCCAAGAGATCCGTTGTTGAAAGTTGTATTTAGAATTATATATTCGAAATAGCTTCAGACAAAAAATTTACAATAAAAGGTTGGTATTATGCTGCCGAGTCGAAAAAACGACTCGGAGCAAACATTGCACACAAGGTGAGTACTTGTTTAAAAAGTGCAGTAAAACACTTATTATGAATGATCCTTCCGCAGGTTCACCTACGGAAACCTTGTTACGACTTTTAC
>ab44838fff3b158939348d2439d37c67
GAGAGCCTAGAGATCCGTTGCTAAAAGTTTTTTACCCTTTTATTGTCAGAGCAGGTGGTGCCTTGCAGCTACTCCCTGATGACGGATTTCAAGACTGATGTATAAAAGTAGCAGACCTCCTCTCACCCATGGGCTTAAGAAGAGTCTGATTCGCCCCCAATGACAAGTCAATGAGAGCTGCTGCCAGGTATGACTGATGCCTACCCGAGGGCAGACAACAGCCAAAGACTGGCAGCGTCAGGTTGTTTTGCACATGAATTATTGGTGTTAACCAAGTATTAATAATGATCCTTCCGCAGGTTCACCTACGGAAACCTTGTTACGACTTTT
>6c97b38982717fcec849f8864054a3fe
TAAAAGTCGTAACAAGGTAACCGTAGGTGAACCTGCGGTTGGATCATTATTAAAGTAAAGCTTTAGAGCTTTCAAAACCGCTTGGGCTTCTGGTAAAACAGTTGCTCGAGTCAACCTTGTGTGAACCGTTGATTGTATTTGGCAATGCCTAGTTTTACTAGCTTGCCGCCTTTATTAAACACCCTTTTTATTACCGTCTTAATCAAATATAAAAATTTGAAACAACTTTTGACAACGGATCTCTTGGCTCTCG
>a15772c9f1d6a38eb04fc260510dca6b
GTAAAAGTCGTAACAAGGTCTCCGTAGGTGAACCTGCGGAGGGATCATTACACAAATATGAAGGCGGGCTGGAACCTCTCGGGGTTACAGCCTTGCTGAATTATTCACCCTTGTCTTTTGCGTACTTCTTGTTTCCTTGGTGGGTTCGCCCACCACTAGGACAAACATAAACCTTTTGTAATTGCAATCAGCGTCAGTAACAAATTAATAATTACAACTTTCAACAACGGATCTCTTGGTTCTGGC
>eaa37e8c0bec458b1c43ff302812aed0
AAAAGTCGTAACAAGGTTTCCGTAGGTGAACCTGCGGAAGGATCATTATTAATACTTGGTTAACACCAATAATTCATGTGCAAAACAACCTGACGCTGCCAGTCTTTGGCTGTTGTCTGCCCTCGGGTAGGCATCAGTCATACCTGGCAGCAGCTCTCATTGACTTGTCATTGGGGGCGAATCAGACTCTTCTTAAGCCCATGGGTGAGAGGAGGTCTGCTACTTTTATACATCAGTCTTGAAATCCGTCATCAGGGAGTAGCTGCAAGGCACCACCTGCTCTGACAATAAAAGGGTAAAAAACTTTTAGCAACGGATCTCTAGGCTCTC
>c6451c57cd82a7ed136786a8dade2b29
AAAAGTCGTAACAAGGTAACCGTAGGTGAACCTGCGGTTGGATCATTGATTTATTCAGAGTATCCTGTAACCTGTGAACAGCGTTACCAGTGCCCCTCATTGTTAGGACACTTGTTAACATCGTCACTGTCAAAGAACTTGTTCTAGACATACTGAACCAATACGTGAATTCAAAACTATAACTTTTTTAAAACTAAACAAATTACAACTTCTGGCAATGGATCTCTTGAGTCCT
>acadcd4952cfd0f788e334d1f2972f51
GCCAGAACCAAGAGATCCGTTGTTGAAAGTTGTAATTATTAATTTGTTACTGACGCTGATTGCAATTACAAAAGGTTTATGTTTGTCCTAGTGGTGGGCGAACCCACCAAGGAAACAAGAAGTACGCAAAAGACAAGGGTGAATAATTCAGCAAGGCTGTAACCCCGAGAGGTTCCAGCCCGCCTTCATATTTGTGTAATGATCCCTCCGCAGGTTCACCTACGGAGACCTTGTTACGACTTTTAC
>d5efa119a6d928ae2d5bd3d36e69acbf
AGAACCAAGAGATCCGTTGTTGAAAGTTTTAACGATTTACTTTTCGTATACTGACAGAAGTTTACAGAAATGGTTTCATGGTGGGCCTCAGGCGGGCTGACAGCACGAGGCATGCCGCCGAAGCAACGGGAAGGTTCACAATGGTTTGAAGTAACGAGTACCACACCGCATCCCCATAAAGGGGCTCCGCGGGTGGCATTACGTACGGATTAGAGCCCCGGAGGCTGGTCCACCCAGATACTGGATCCAGGGTGAAGGATTTTTAATGATCCTTCCGCAGGTTCACCTACGGAAACCTTGTTACGACTTT
>e3013ed929c0eac7060d299f160206cd
CCAGAGCCAAGAGATCCATTGTTAAAAGTTGTAAACGATTATATCGTACTCAGACAAACATAAACTATCCACGAGTTGGGGCCCTCTGGCAGAGCTGAAGCCCGGAACCACCCGGGCAGGAGCCTTGCCAAAGCAACAGAGGTAAGGTAAACAAAGGGTAAGGGGTGTCACCACCCGGGGAGCCCAGGGGCTCGGCGGGGGCTTGTCCCAGGGACCGGAGTCCCTTTTCAGTAATGATCCTTCCGCAGGTTCACCTACGGAAACCTTGTTACGACTTTTA
>8f7f31ac139575feb64139f5e99365ba
GTAAAAGTCGTAACAAGGTTTCCGTAGGTGAACCTGCGGAAGGATCATTAGTGAATTTAGAGTGTGCTTCGCGCAGCTTGACCCCCACTTTCTTAACTCTGTGCACCATTTTGGCATTACGAAAAAATATTTAGAGTTTATCTTTTTATATATAAATAAGTTTTGCGGCTCACTTTAAACACTAGTCAAAGAATGTAAAATGAAATATATAAATATAAAAAAACTTTCAACAACGGATCTCTTGGCTCTCGC
>a322fd67d4267bae8e63e0046bceaa8e
TAAAAGTCGTAACAAGGTTTCCGTAGGTGAACCTGCGGAAGGATCATTACCGAGTGTAGGGTTCCTAGCGAGCCCAACCTCCCACCCGTGTTTACTGTACCTTAGTTGCTTCGGCGGGCCCGCCATTCATGGCCGCCGGGGGCTCTCAGCCCCGGGCCCGCGCCCGCCGGAGACACCACGAACTCTGTCTGATCTAGTGAAGTCTGAGTTGATTGTATCGCAATCAGTTAAAACTTTCAACAATGGATCTCTTGGTTCCGG
>763eb4b66a42c1901ec56d1719f64119
GTAAAAGTCGTAACAAGGTTTCCGTAGGTGAACCTGCGGAAGGATCATTAGTGAATTATAGGGCGTCTACTTGTAGAGCCTGACCTCCACTTCTAACACTGTGCACTTGATGGAAAGGTAATTAGATTGAGCCTTCGGGCTTATGAAGAGAACCTTTCGGCTTCATTTTAAACATTAGTCAAAGTATGTAAAGAAATTTAAAACAAAAAAAAACTTTCAACAACGGATCTCTTGGCTCTCGC
>2f071d2576a7e0edd238b29f76bdbba7
AAAGTCGTAACAAGGTAACCGTAGGTGAACCTGCGGTTGGATCATTAACAATTTTGGGCTTTAGAGCTCTTAATACTGGGGCCGCCTCAAAACGGCCTTGGTCAACACTTGTGAACTATAGATGCTACCGCATTCTTAACCCCTTTATAAAACCCGTCTTAATCAAATAACAAAATTTGAAACAACTTTTGACAACGGATCTCTTGGCTCT
>eee41cdc74b2395ec6cbcc2e3e270c6a
CAGAACCAAGAGATCCGTTGTTGAAAGTTTTAACTATTATATAGTACTCAGACATCACTAAAAACAGAGTTTGTTTCCTCTGGCAGGCACGCATCAGCCGGAGCCCATGGTGTTTCCACGGCCTGCCAAAGCAACGAAGGTATAGTATTCAAGGGTGGGAGATCTACCCGTGAGGGCATGAACTCTGTAATGATCCTTCCGCAGGTTCACCTACGGAAACCTTGTTACGACTTTT
>638c2d665185190ae81280c374961ebc
GTAAAAGTCGTAACAAGGTCTCCGTAGGTGAACCTGCGGAGGGATCATTAAAGAGTGACGGGCCTCCGGGCCCGGCGCCCAACCCTCTGAAGTTGATACCTGTTGCCTCGGGGGCACACCTGCTGCCCCCGGTGGTCATCAAACCCCGAATAACTGCGTACGAGTCACATTCAATATTTAAAACTTTCAACAACGGATCTCTTGGTTCTGGC
>042a33b000ce5ce1e0bdaa9e509c0589
GTAAAAGTCGTAACAAGGTTTCCGTAGGTGAACCTGCGGAAGGATCATTACAGTAGTCACCCGGGTTGCCGCAAGGCCTCTCGGGTAACCTACCACCCTTTGTTTATTACACTTTGTTGCTTTGGCAAGCCTGCCCTCGGGCTGCTGGCTCCGGCCGGCGAGCGCTTGCCAGAGGACCTAAACTCTGTTTGTCTATAATGTCTGAGTACTATATAATAGTTAAAACTTTCAACAACGGATCTCTTGGTTCTGGC
>c231ed83d5452b738281702c4a24eb0c
GTAAAAGTCGTAACAAGGTTTCCGTAGGTGAACCTGCGGAAGGATCATTAACAAATCTGCTATGCGGCCGAGCCTTCGGGCTTGACGCATATATTTACCCCGAGCCTGGCAGCAATGCCGGCTTTGGTTGGGCGTGGACGCAAGTTCACTGCTCCGGTTGTGTGAGGGCGCAAGCCACTTGCCAACCACATAGACGATTGTATGTTTGACAGAGTTACAGTTGTAAAACTAAAATGACAACTTTTAACAATGGATCTCTTGGCTCTTGC
>769aded579b2d2e5b21345ed76670558
GAGAACCAAGATATCCGTTGCTAAGAGTTGTTCGGAATTTCGTAATATCGCTAGGGTTTCAAGCCTAGTGAGATTAAAGTCGATCAAATTTGGAATGGGTTGTTTAAAAAAGAGTTATAAGGTCACCTCCAAAAAGAGGGTGTGACCCGAGGTCATCGCTTCCGTTTTACCGGTCACGACGTTTAAGTTATGAAGTTCACAGGTGTTTATTAATACGTAGGATACGTGCTAATGATCCTTCCGCAGGTTCACCTACGGAAACCTTGTTACGACTTTT
>e0ed4dd5ef4b481759f85976015e5a58
AAGAGCCTAGAGATCCATTGTTAAAAGTTGTCTACTAATTATCACACACACATTGTCTACATTACACACATTTATATTCAGCCTGCATCTTGCGACACAGGCCGAGTTAATATACTACAGCGCCTTGCGGCACTGCAGCAGGATTTGTTAATGATCCTTCCGCAGGTTCACCTACGGAAACCTTGTTACAACTTTTACTTCCTC
>be81249f26e395754bb80acf340d14ef
GCAAGAGCCTAGAGATCCATTGTTATAAGTTGTACAAGTTTTCGTTTGATTGAAATCAAGATACATTTGAGCAACAACGTAACACTAGTTTAACAGCCCAGGCCAGGGCTCGGCATCGTCCCAGCAGGCAGGCCCCGAGGAGCCTAAAAGCGTGGAAACGGCGCGCACCCTGGTCTGGGGAACATTTCAACGTGGTCTCGGGTATGAGACGTGGATGGATTTGTAATGATCCTTCCGCAGGTTCACCTACGGAAACCTTGTTACGACTTTTAC
>848d885ac83cc1320177c59651a8df6c
TAAAAGTCGTAACAAGGTTTCCGTAGGTGAACCTGCGGAAGGATCATTCATAATAAGTGTTTTATGGCACTTTTTAAATCCATATCCACCTTGTGTGCAATGTCAGTCGATCTTCTTTATGGAGATCGGCCAAACATCAACCTAATTTTTTAACTCTTTGTCTGAAAAATATTATGAATAAAATAATTCAAAATACAACTTTCAACAACGGATCTCTTGGCTCTCG
>95524ef4974f20ba5a60540004d43627
AAAGTCGTAACAAGGTTTCCGTAGGTGAACCTGCGGAAGGATCATTACCGTGGGGTTTCGGCCCCATTGAGATAGCACCCTTTGTTTATGAGTACCCTTGTTTCCTCGGCGGGCTTGCCCGCCATGAGGACATCAAAAACCCTTTGTAGTAGCAGTAACTTCAGTTAATAATAAATATTAAAACTTTCAACAACGGATCTCTTGGTTCT
>e9ee7bd52812819291f3d5add9e4ebbe
TAAAAGTCGTAACAAGGTTTCCGTAGGTGAACCTGCGGAAGGATCATTACAAATTAGTTGTGATTGTGTGCGTGGGATTGGATGAGAAATCGTTCAGTCTCAGCCACAATCGCTTAAGCCCACTCCTGAAAGGGAGATGGACGCACACGGTAACACGTGTGCAAATATACTTTAAATCATGACTTATTCCAAAAAGAAAATAACCAAAACTTTTAACAATGGATCTCTTGGCTCTTG
>8de14332ede13665b1973d887f056996
CGAGAGCCAAGAGATCCGTTGTTGAAAGTTTTTCTTATTTTTTTTTATTTACATACTTATACTGGTGTTTAAAGTGAGCCACAGAAAACCACCTTCACAAAAGTTTCCAATCGTGTCAGTTTTTTTCCGTCAATGAGTGCACAGTGTATAGAGTGGAGGTCACGCTCTGCAAGCAGATGCGCTAAAATTCACTAATGATCCTTCCGCAGGTTCACCTACGGAAACCTTGTTACGACTTTTA
>dc2cb4e4d16bf22ef04f6a2d108dab0d
GCGAGAGCCAAGAGATCCGTTGTTGAAAGTTTTTTTTTGTTTTATATTTCATTACATACTTTGACTAATGTTTAAAATGAAGCCGCAAGGTAATTTCACTCGAAAGTTTCATTACCTCGCCATCAAGTGCACAGTGTTAGAAGTGGAGGTCAGGCTCTACAAGTAGACGCCCTATAATTCACTAATGATCCTTCCGCAGGTTCACCTACGGAAACCTTGTTACGACTTTTAC
>0c61742dae3d1433c59fd7d36dc3afcb
AGGACTCAAGAGATCCATTGCCAGAAGTTGTAATTTGTTTAGTTTTAAAAAAGTTATAGTTTTGAATTCACGTATTGGTTCAGTATGTCTAGAACAAGTTCTTTGACAGTGACGATGTTAACAAGTGTCCTAACAATGAGGGGCACTGGTAACGCTGTTCACAGGTTACAGGATACTCTGAATAAATCAATGATCCAACCGCAGGTTCACCTACGGTTACCTTGTTACGACTTTT
>f56bb5e66de2ac7da360f25ac26ba964
AAAGTCGTAACAAGGTTTCCGTAGGTGAACCTGCGGAAGGATCATTAGTGAATTATAGGGCGTCGTTCACTTCGGTGACGAGCCTGACCTCCACTTTCTAACTCTGTGCATTTTATTGGTGAGCAACGAACGACCCCGGCTTCGGCCGGGCGAGTGAAGTGCTTACGGCTCATTTTAAACACCAGTCAAAGTATGTAACGAAATATCGAAATAAAAAAAAACTTTCAACAACGGATCTCTTGGCTCT
>3fec0d2821eef66cce662a4450932343
TAATCAATGGGAAAGGCATAAAAATAAAGCCGGCACAAATAGGCGATAAGGACGTACGTGTTGTGTCTTACAGAACGTACAAAAAACGCGAAAACTATGTTGAACCCGTTATTGACCTAAGGCATCAGGAAAATCTCGAAAAAGGCCTAGAAGACGCTACACATGTACGAATCGTTTATACGAAAACTGAAGTCATGATATTTCCTGTTAAGGACCATGAACAAAGCGCGATAAACGATCCAAAAGAATGTGAAATGTCTATCGG
>212db247e600a3e32984ea50bd009fe1
AGAACCAAGAGATCCGTTGTTGAAAGTTTTAACGATTATATGGGACTTAGACGGCACAGAAAACAGGAGTTGGGGCCTCTGGTCGGCGCGTACCAGCAGAGAGCCGGTAGCGGGCGGGCCCGCGGCCGACCAAAGCAACAAAGGTATCGTTCACACGGGTGGGAGGTCTACCCCGAAGGGCACGAACTCTGTAATGATCCCTCCGCAGGTTCACCTACGGAGACCTTGTTACGACTTT
>f2582afe7087d05de02d9ff689e9e4a7
CGAGAGCCAAGAGATCCGTTGTTGAAAGTTGTATTTTGAATTATTTTATTCATAATATTTTTCAGACAAAGAGTTAAAAAATTAGGTTGATGTTTGGCCGATCTCCATAAAGAAGATCGACTGACATTGCACACAAGGTGGATATGGATTTAAAAAGTGCCATAAAACACTTATTATGAATGATCCTTCCGCAGGTTCACCTACGGAAACCTTGTTACGACTTTTA
>7d823f3c5dd7f7e0fc83a8a54fcad203
CACGAGCCAAGAGATCCACCGTTTAAAGTTGTCATTAAGTTGTTATGTTTAACTGGAGACATCTTGCGATGCTGCCAGACCAAACGACTAACGTTCATTCGGTCAGAACTGACTTGGTTCACAATGGGTTAAAATATAAATCATGGAAGCAAGCAAGCTTACTTTGGTCCACAATTCAATATATATAAAGGGTTGGTTCACACAAATGGGTCGATATAGAATCGTTTGTGAATGATCCTTCCGCAGGTTCACCTACGGAAACCTTGTTACGACTTTTA
>1602ae3b4c8904007071099ca10fbf57
CGGAACCAAGAGATCCGTTGTTGAAAGTTTTTACTATTGAGCTTTTTCCTCAGACGGCACTGAAAGGAGTTTGCAAAGCCTCCGGCGGGCGCTCGCAAGCCCAGGGTCGCCCCGAGGCCGGCGTCGGGAGGGCCCGAGGCCCGCCAAAGCAACGAAGGTATATAGGCACGGGTTGAAGAGTGGCGGCCGGAGCCCCCGGGGCGAAAGGCCCCTTCTCTCGTTAATGATCCTTCCGCAGGTTCACCTACGGAAACCTTGTTACGACTTTT
>5713c650d0cfc608633830c489e9305c
AGCGTCGTAACAAGGTTTCCGTAGGTGAACCTGCGGAAGGATCATTACAAAATTAAGATTGTGTGCGTGAGAGTTGGGGTGTTAGTGGGGTGAGTTGTACGAGTAATATTGTGCAGTTTGTCGTGTAACACGCCACTTTGCGTGGCACTAGGCCCACTCCTGAAAGGGAGATGGTAGCATGCTTCGGTGTGCAAATAAACATTAAATCATGACTTTTACCAAGAAAAAGTAAATAACCAAAACTTTTAACAATGGATCTCTTGGCTCT
>45c533fad656755ff034013a5934a426
AAAAGTCGTAACAAGGTTTCCGTAGGTGAACCTGCGGAAGGATCATTAGTGAATTATAGGGCGTCTACTTGTAGAGCCTGACCTCCACTTCTAACACTGTGCACTTGATGGCGAGGTAATGGAACTTTCGAGTGAAACTACCTTGCGGCTTCATTTTAAACATTAGTCAAAGTATGTCATGAAATAAAAAACAAAAAAAAACTTTCAACAACGGATCTCTTGGCTCTC
>9f3c4ac0701d8b41161beef7fd7cbc94
GAGAGCCAAGAGATCCGTTGTCAAAAGTTGTTTATATTTTATTATAATTTCAGACAAGTTTTTATGGTTTGTTATAAAGTTTGGCAGCCTATACCAAGGTATAAACTACCAAAAGACAATATAGTGCACAAGAGGTGAATTTGGCTATGAGGACTCCTTTCGGTATCAACTCATAGACCAAGTATCAGTAATGATCCAACCGCAGGTTCACCTACGGTTACCTTGTTACGACTTTT
>2f0343f4bf9dffd8bb7254d82ee5c795
TAAAAGTCGTAACAAGGTTTCCGTAGGTGAACCTGCGGAAGGATCATTAAAGAGACGTTGCCCTTCGGGGTATACCTCCCACCCATTGTTTATTTACCTTTGTTGCTTTGGCAGTCCCGGCTTCGGCCCACCGGCTCCGGCTGGTCAGTGACTGTCGAGGATACCAAAACTCTGTTTGTTAATATTGTCTGAGTACTATATAATAGTTAAAACTTTCAACAACGGATCTCTTGGTTCTGG
>f329b8e9338f48aa1b498890b4dfa701
GTAAAAGTCGTAACAAGGTTTCCGTAGGTGAACCTGCGGAAGGATCACTAAAGAGAACTTGCCCTTCGGGGTAGATCTCCCACCCTTTGTTTATCATACTTTGTTGCTTTGGCGGGCCTGCCTCACGGCTGCTGGCGCAAGCTGGCTCGTGCCCGCCAGAGACCCCTAAACTCTGAATATTGTCGTCTGAGTAATATATAATAAGTTAAAACTTTCAACAACGGATCTCTTGGTTCTGGC
>947578cce79bd7ad035330102511f725
GCGAGAGCCAAGAGATCCGTTGTTGAAAGTTGTATTTTGAATTAAGTATTCATAATAGTTTTTCAGACAAAGTGGTTCAAGGTTATAGGTTGGTGTAGGTGTGAAATTCTCACACGAGGTGAAAAATACCACACAACATTGCACACAAGGTGAGTACTATTTTTTAAAAAGTGCAGTAAAACACTTATTATGAATGATCCTTCCGCAGGTTCACCTACGGAAACCTTGTTACGACTTTTAC
>9a39a544125fb969546199e6a0162cf0
CAGAACCAAGAGATCCGTTGTTGAAAGTTTTAACTATTATATAGTACTCAGACAATATTAACAAACAGAGTTTTAGGTCCTCTGGCAGACACTGACCAGCCGGAGCCGGTGGGCCGAAGCCGGGTCTGCCAAAGCAACAAAGGTATAAATAAACAAAGGGTGGGAGGTATACCCCGAAGGGCAACGTCTCTTTAATGATCCTTCCGCAGGTTCACCTACGGAAACCTTGTTACGACTCGT
>7add60f3bda36a60f621e304e2f25dc2
CAGGTCGTAACAAGGTCTCCGTAGGTGAACCTGCGGAGGGATCATTACAAGTGACCCCGGTCTAACCACCGGGATGCTCATAACCCTTTGTTGTCCGACCACGTTGCCTCCGGGGCGACCCTGCCTTCTGGCGGGGGCCCCGGGTGGACACATTCAAACTCTTGCGTAACTTTGCAGTCTGAGTAAATTTAATTAATAAATTAAAACTTTCAACAACGGATCTCTTGGTTCT
>e7499a238133432a9bdab9a2eca47a82
AAAAGTCGTAACAAGGTAACCGTAGGTGAACCTGCGGTTGGATCATTAACAATTTTGGGCTTTAGAGCTCTTAATACTGGGGCCGCCTCAAAACGGCCTTGGTCAACACTTGTGAACTATAGATGCTACCGCATTCTTAACCCCTTTATAAAACCCGTCTTAATCAAATAACAAAATTTGAAACAACTTTTGACAACGGATCTCTTGGCTCTC
>d607251ad5159adb7faa33cdd4e262cc
AAAAGTCGTAACAAGGTAACCGTAGGTGAACCTGCGGTTGGATCATTACTGATACTTGGTCTATGAGTTGATACCGAAAGGAGTCCTCATAGCCAAATTCACCTCTTGTGCACTATATTGTCTTTTGGTAGTTTATACCTTGGTATAGGCTGCCAAACTTTATAACAAACCATAAAAACTTGTCTGAAATTATAATAAAATATAAACAACTTTTGACAACGGATCTCTTGGCTCTC
>1ac76d18b14a34dae7fbeb3e13c6e9ba
GCCAGAACCAAGAGATCCGTTGTTGAAAGTTTTACTTATTGCTTGTTAAGACTCAGACATCACTGTTATAGAATTTGGGGGGGCTACTGGCGGGCACGGGCGGGAGGGGAGAGACCCTCGGGCGATCCGGTGAAGGACGGGCCCGCCAAAGCAACGTGGTAAGATAGACAAGGGTTGGAGATGGGGCCCAGAGGACCCGCACTCGATAATGATCCTTCCGCAGGTTCACCTACGGAAACCTTGTTACGACTTTTAC
>578662e5ac41331aefe0fa8bf06ea0b4
TAAAAGTCGTAACAAGGTTTCCGTAGGTGAACCTGCGGAAGGATCATTAAAAATGAAGCCGGGAAACCGGTCCTTCTAACCCTTGATTATCTCAATTTGTTGCTTTGGTGGGCCGCGCAAGCACCGGCTTCGGCTGGATCGTGCCCGCCAGAGGACCACAACTCTGTATTAAATGTCGTCTGAGTACTAAAAAATAGTTAAAACTTTCAACAACGGATCTCTTGGTTCTGG
>61f12a3c4df2e3ea5b67283634d577fb
TAAAAGTCGTAACAAGGTTTCCGTAGGTGAACCTGCGGAAGGATCATTCACAAACGATTCTATATCGACCCATTTGTGTGAACCAACCCTTTATATATATTGAATTGTGGACCAAAGTAAGCTTGCTTGCTTCCATGATTTATATTTTAACCCATTGTGAACCAAGTCAGTTCTGACCGAATGAACGTTAGTCGTTTGGTCTGGCAGCATCGCAAGATGTCTCCAGTTAAACATAACAACTTAATGACAACTTTAAACGGTGGATCTCTTGGCTCGTG
>3b232ba587ab9b578818e1ac3964909f
GTAAAAGTCGTAACAAGGTTTCCGTAGGTGAACCTGCGGAAGGATCATTAACGAGTTAGGGTCTTCTAGGCCCGATCTCCAACCCTTTGTATAATCACCATGTTGCTTTGGCGGGCCCGTCTTTAACCGGACCGCCGGGAGGTTTCAAACCCCTGGCCAGTGCTCGTCAATAGCCCTTCATAAACTCTTTTAACCATGTTAATCTGAAAATATTTAAATAAACTAAAACTTTCAACAACGGATCTCTTGGTTCTGGC
>92963db03a290f06e8d4f697684215c3
AAAAGTCGTAACAAGGTTTCCGTAGGTGAACCTGCGGAAGGATCATTACAGAGTTCATGCCCTCACGGGTAGATCTCCCACCCTTGAATACTATACCTTCGTTGCTTTGGCAGGCCGTGGAAACACCATGGGCTCCGGCTGATGCGTGCCTGCCAGAGGAAACAAACTCTGTTTTTAGTGATGTCTGAGTACTATATAATAGTTAAAACTTTCAACAACGGATCTCTTGGTTCTG
>13cc8346b29aeaa7fb7adc3f5adab0e7
GAAGTAAAAGTCGTAACAAGGTAACCGTAGGTGAACCTGCGGTTGGATCATTACCAATTGACGAAAGTCTATAAACCTGTGCATCAATGCTGTTTCTGGAGCGCGTCTCGGCGTGCTCCAAACTACCAAATCTAATATACGTCTTTATAAAGTGAAAGCTAAACAACTTTTGACAACGGATCTCTTGGCTCTCGCATCGATGAAGAAC
>222649ebcc5beda7bdab7ef3faf3d15d
CGAGAGCCAAGAGATCCGTTGTCAAAAGTTGTTTCAAATTTTTATATTTGATTAAGACGGTAATAAAAAGGGTGTTTAATAAAGGCGGCAAGCTAGTAAAACTAGGCATTGCCAAATACAATCAACGGTTCACACAAGGTTGACTCGAGCAACTGTTTTACCAGAAGCCCAAGCGGTTTTGAAAGCTCTAAAGCTTTACTTTAATAATGATCCAACCGCAGGTTCACCTACGGTTACCTTGTTACGACTTTTA
>5ed99d9d8c3572b36e87c830b2e19c9b
AAAAGTCGTAACAAGGTTTCCGTAGGTGAACCTGCGGAAGGATCATTACAGTAGTCGCCCGGGACGCCGCAAGGCCTCCCGGGTAACCTACCACCCTTTGTTTATTACACTTTGTTGCTTTGGCAGGCCTGCCCTCGGGCTGCTGGCTCCGGCCGGCGAGCGCCTGCCAGAGGACCTAAACTCTGTTTGTCTATACTGTCTGAGTACTATATAATAGTTAAAACTTTCAACAACGGATCTCTTGGTTCTG
>b44a1d5ab51b1dd8e913401bbcab0445
AGAACCAAGAGATCCGTTGTTGAAAGTTTTAACTATTTTATAGTACTCAGACGACATTTAATACAGAGTTGTGGTCCTCTGGCGGGCACGATCCAGCCGAAGCCGGTGCTTGCGCGGCCCACCAAAGCAACAAATTGAGATAATCAAGGGTTAGAAGGACCGGTTTCCCGGCTTCATTTTTAATGATCCTTCCGCAGGTTCACCTACGGAAACCTTGTTACGACTTT
>8e366a51d8e2c4d094208214241257d5
GCAAGAGCCAAGAGATCCATTGTTAAAAGTTGTCATTTTAGTTTTACAACTGTAACTCTGTCAAACATACAATCGTCTATGTGGTTGGCAAGTGGCTTGCGCCCTCACACAACCGGAGCAGTGAACTTGCGTCCACGCCCAACCAAAGCCGGCATTGCTGCCAGGCTCGGGGTAAATATATGCGTCAAGCCCGAAGGCTCGGCCGCATAGCAGATTTGTTAATGATCCTTCCGCAGGTTCACCTACGGAAACCTTGTTACGACTTTTAC
>38fc06516af775955b113a4637042f95
AGAACCAAGAGATCCGTTGTTGAAAGTTTTAATATTTATTATTAACTGAAGTTACTGCTACTACAAAGGGTTTTTGATGTCCTCATGGCGGGCAAGCCCGCCGAGGAAACAAGGGTACTCATAAACAAAGGGTGCTATCTCAATGGGGCCGAAACCCCACGGTAATGATCCTTCCGCAGGTTCACCTACGGAAACCTTGTTACGACTTT
>948e95812d1d0942cafeefd006c0fe31
AGAGCCAAGAGATCCGTTGTTGAAAGTTTTTTTTTGTTTTATATTTCATTACATACTTTGACTAATGTTTAAAATGAAGCCGCAAGGTAATTTCACTCGAAAGTTTCATTACCTCGCCATCAAGTGCACAGTGTTAGAAGTGGAGGTCAGGCTCTACAAGTAGACGCCCTATAATTCACTAATGATCCTTCCGCAGGTTCACCTACGGAAACCTTGTTACGACTTT
>db5b0f9e08686b69125e0f641a56fda2
AAAGTCGTAACAAGGTCTCCGTTGGTGAACCAGCGGAGGGATCATTACCGAGTTTACAACTCCCAAACCCCTGTGAACATACCTTACTGTTGCCTCGGCGGATCAGCCCGCTCCCGGTAAAACGGGACGGCCCGCCAGAGGACCCCTAAACTCTGTTTCTATATGTAACTTCTGAGTAAAACCATAAATAAATCAAAACTTTCAACAACGGATCTCTTGGTTCT
>621ba4c4d47cd77e23818da9571de0c9
AAAGTCGTAACAAGGTTTCCGTAGGTGAACCTGCGGAAGGATCATTAGTGAATATTAGGACATCGCTTCGGCGAGTTCGACCCTCCACTTTTCAACTCTGTGCATTTATTGGCGGAATCGAGCGAGCAATCGTGAAGTTCTGCGTCTCATTTTTAAACACTAGTCAAAGTATGTAACGAAATATCGAAATAAAAAAAAACTTTCAACAACGGATCTCTTGGCTCT
>924662e7f085223565cbe23e3eb06dbf
GTAAAAGTCGTAACAAGGTTTCTGTAGGTGAACCTGCAGAAGGATCATTAGTGAAGATTTGGGCAGGCCATACGGACGCCAAAAAGTGTCCCTGGCCGCCTACACCCACTATACATCCACAAACCCGTGTGCACTGTCTTGGAGAAAGGCTTCAGAGAAGTTTTTTGTGGCCTCTCTTGGGGTCTTTCTTCGCTACAAACTCGAATGGTTAGTATGAACGTGGAACTTGGTTGGACCGTCACTGGCCAACAAACTATACACAACTTTCGACAACGGATCTCTTGGTTCTCCC
>c5d45f01fdec66109fdaae6c571e73aa
AAAAGTTGTAACAAGGTTTCCGTAGGTGAACCTGCGGAAGGATCATTAACAAATCCTGCTGCAGTGCCGCAAGGCGCTGTAGTATATTAACTCGGCCTGTGTCGCAAGATGCAGGCTGAATATAAATGTGTGTAATGTAGACAATGTGTGTGTGATAATTAGTAGACAACTTTTAACAATGGATCTCTAGGCTCTTGCATCGAT
>f3635a2decee5350e02b3d1e765d57fb
AAAGTCGTAACAAGGTTTCCGTAGGTGAACCTGCGGAAGGATCATTAAAAATCCTTCACCCTGGATCCAGTATCTGGGTGGACCAGCCTCCGGGGCTCTAATCCGTACGTAATGCCACCCGCGGAGCCCCTTTATGGGGATGCGGTGTGGTACTCGTTACTTCAAACCATTGTGAACCTTCCCGTTGCTTCGGCGGCATGCCTCGTGCTGTCAGCCCGCCTGAGGCCCACCATGAAACCATTTCTGTAAACTTCTGTCAGTATACGAAAAGTAAATCGTTAAAACTTTCAACAACGGATCTCTTGGTTCT
>dd2be11737464cd919694bc01da2d9f7
AAAAGTCGTAACAAGGTTTCCGTAGGTGAACCTGCGGAAGGATCATTACCGAGTTCATGCCCTTCGGGGTAGATCTCCCACCCTTTGTATACCATACCTCTGTTGCTTTGGCGGGCCGCCTAGCTACTGGCTTCGGCTGGTAAGTGCCCGCCAGAGGACCCAAAACCCTGAATATTAGTGTCGTCTGAGTAAAAAGTTTAATATTTAAAACTTTCAACAACGGATCTCTTGGCTCTG
>5ab2ed98b6eb99b241a578f63292d44a
CCGGAACCAAGAGATCCATTGTTGAAAGTTTTAACTGATTGCGATACAATCAACTCAGACTTCACTAGATCAGACAGAGTTCGTGGTGTCTCCGGCGGGCGCGGGCCCGGGGCTGAGAGCCCCCGGCGGCCATGAATGGCGGGCCCGCCGAAGCAACTAAGGTACAGTAAACACGGGTGGGAGGTTGGGCTCGCTAGGAACCCTACACTCGGTAATGATCCTTCCGCAGGTTCACCTACGGAAACCTTGTTACGACTTTTA
>43f86bb9dedb648be507a19aeb5813a9
AAAAGTCGTAACAAGGTTTCCGTAGGTGAACCTGCGGAAGGATCATTAAAGAGTCGGCCCCCCAACGTGGGAGGTCTCGACCCTACACCCCCCTGTTTACCGACCTCACACGAACTCTGTATACAGACACGAAGTCGTCCTTAGCGGGGCGCACGACCACAAAAACGTATAACAAAATTAAAACTTTCAACAACGGATCTCTTGGTTCTG
>5b912bc937c8ff8208637ff4ee60dee7
AAAGTCGTAACAAGGTTTCCGTAGGTGAACCTGCGGAAGGATCATTGTCGTGACCCTGACCAAAATAGACCGTGCACGCGTTATCCAACCTGTCGGCGGCGGCACCGTCCGTTGCTCGGCCAAGTCCTCGACAACCTCCTCTTCTTTGAGTGGGGGCTCGGGGTAAAAGAACCCACGGCGCCTAAGGCGTCAAGGAACACTGTGCCTAACTCGGGGACGCGGCTGGCTTGCTGGCCGCCCCTCGTGTTGCAATGCTATTTAATCCACATGACTCTCGGCAACGGATATCTCGGCTCT
>323747b7b18876a914f97a7c76e77ce3
AGAACCAAGAGATCCGTTGTTGAAAGTTTTGATTTATTTATGGTTTTACTCAGAAGTTACATATAGAAACAGAGTTTAGGGGTCCTCTGGCGGGCCGTCCCGTTTTACCGGGAGCGGGCTGATCCGCCGAGGCAACAGTAAGGTATGTTCACAGGGGTTTGGGAGTTGTAAACTCGGTAATGATCCCTCCGCTGGTTCACCAACGGAGACCTTGTTACGACTTT
>13616a28894a651c113587b290bb2b69
CAAGAGCCAAGAGATCCATTGTTAAAAGTTTTGGTTATTTTCTTTTTGGAATAAGTCATGATTTAAAGTATATTTGCACACGTGTTACCGTGTGCGTCCATCTCCCTTTCAGGAGTGGGCTTAAGCGATTGTGGCTGAGACTGAACGATTTCTCATCCAATCCCACGCACACAATCACAACTAATTTGTAATGATCCTTCCGCAGGTTCACCTACGGAAACCTTGTTACGACTTTTA
>30a6d41e665b7c6857fd6adbbd412195
CAGAACCAAGAGATCCGTTGTTGAAAGTTTTAATTTTGTTATACGTTTTTGTGGTCGTGCGCCCCGCTAAGGACGACTTCGTGTCTGTATACAGAGTTCGTGTGAGGTCGGTAAACAGGGGGGTGTAGGGTCGAGACCTCCCACGTTGGGGGGCCGACTCTTTAATGATCCTTCCGCAGGTTCACCTACGGAAACCTTGTTACGACTTTT
>56eefc398beceb0ce2b70e4a207282a4
AGAGCCAAGAGATCCGTTGTTGAAAGTTTTTTTTTATTTCGATATTTCGTTACATACTTTGACTAGTGTTTAAAAATGAGACGCAGAACTTCACGATTGCTCGCTCGATTCCGCCAATAAATGCACAGAGTTGAAAAGTGGAGGGTCGAACTCGCCGAAGCGATGTCCTAATATTCACTAATGATCCTTCCGCAGGTTCACCTACGGAAACCTTGTTACGACTTT
>0dee9faf077f3a82d58d58bfef5556f4
GAGAGCCAAGAGATCCGTTGTCAAAAGTTGTTTCAAATTTTGTTATTTGATTAAGACGGGTTTTATAAAGGGGTTAAGAATGCGGTAGCATCTATAGTTCACAAGTGTTGACCAAGGCCGTTTTGAGGCGGCCCCAGTATTAAGAGCTCTAAAGCCCAAAATTGTTAATGATCCAACCGCAGGTTCACCTACGGTTACCTTGTTACGACTTTT
>7bed9075d798517630f8a1a0c8eedd9e
GCCAGAACCAAGAGATCCATTGTTAAAAGTTGTAATAATTTAGTTTTGTATCGGAAGTGTTGAATGTATAATGCAAAGGGTTTAGTTGGTTCCTGTCGGCGGGCGAACCCGCCGAGGGAAGCAATAGGGGTACACATAGGCAAAGGGTGGGTATAAAGTCAGGCTGTAGCGCCCCTCCGCCGAAGCTTCGAGGGCCAGGGAACCTTGTTGTAATGATCCTTCCGCAGGTTCACCTACGGAAACCTTGTTACGACTTTTAC
>0547889c9ef6306e9da10893d21bac35
GTAAAAGTCGTAACAAGGTTTCCGTAGGTGAACCTGCGGAAGGATCATTAGTGAATTATAGGGCGTCTACTTGTAGAGCCTGACCTCCACTTCTAACACTGTGCACTTGATGGCGAGGTAATGGAACTTTCGAGTGAAATTACCTTGCGGCTTCATTTTAAACATTAGTCAAAGTATGTAATGAAATATTAAAACAAAAAAAAACTTTCAACAACGGATCTCTTGGCTCTCGC
>e6ed11a4555a7feebc3c512efbb1af33
AGAGCCTAGAGATCCGTTGTCAAAAGTTGTTTAAAATTAACATATTTAAATATCAAATTCAATTCAAGACTAAGTAGTAAAAAACGAGTATAAAGATTTTATCAGTAGGTAAAGATTTTCCTTAGTTAAAAAGAAAACCTCCAGAAGCAATTATCCTTTAAGCCCTACCAGAGACAATAAACAGTTCACATAATGTTAAAAAGACAAAGGCCAGACCCAACGTTAATCGAGCCTGCCTAACCTTTGCTTTACAATTTATTAATGATCCAACCGCAGGTTCACCTACGGTTACCTTGTTACGACTTT
>2407bdacf926508166c1a523e3d17793
GTAAAAGTCGTAACAAGGTTTCCGTAGGTGAACCTGCGGAAGGATCATTAATAGAGCAATGAACAGTCAGCGCCCCGGGAGCAATCCTGGGGGTTACCCTCCTCGGAGGGTTTAGAGACGTCGGGCCTCTCGGAGAAGCTCGGTTCAGACCTCCACCCTTGTATAAATTACCTTTGTTGCTTTGGCAGGACGCCTCGTGCCAGCGGCTTCGGCTGCTGAGTGCCTGCCAGAGGACCACAACTCTTGAAATACATGATGTCTGAGTACTATATAATAGTTAAAACTTTCAACAACGGATCTCTTGGTTCTGGC
>92104db07a5cc41505a71371040d6ba4
GGAGCCAAGAGATCCATTGTTAAAGGTTGTATAAATTGAATTGTTTTTAGGCATTCAAGAATTGTTGGTGTGGTTAACAAAAGCCCCAGTGCCCGCTTCTGGTTGGCATCCCGAGAGACGCCAACGCTGCTGGGTCACGTTAATGGTGACAAAGTTCACAGTGATTCAAGTAGTTATTAGGATCCAGTCACTTGCGCAACCTTCACCAAACACTTACACGAATGATCCATCCGCAGATTCATCTACGGATACCTTGTTACGACTTT
>a90c5afd55d066e133329fedbc469936
AAAGTCGTAACAAGGTTTCCGTAGGTGAACCTGCGGAAGGATCATTACAGAGTGGGGCTCCGCGCTCCAGGGGGTTCGCCCCCGCCTCTCAACCCCGTGAATATTATACCTTTGTTGCTTTGGCGGGCCTTGGGGTCATGCTCATGCCGGGCCTTGCCCGGTGCGTGCCCGCCAGAAGCCCACCAAAACTCGTTTGATCCAAGCCGTCTGATGTCTAAAACAAAAATAAAGCAAAACTTTCAACAACGGATCTCTTGGTTCT
>fa5e89256b5e950dfb57583eacbe64fd
CGAGAGCCAAGAGATCCGTTGTTAAAAGTTTTGTTTTTGTTATGATATTACATTCATTACTAACAGTTTGTGATGGCCGAAGCCACAGTTCACGGTGTGTGTGGATGGCCAACTCCGAAGAGAAGGCACTCATTGAACTCAGCTGACCGAAGCCAGAGAGCATTATTAATGATCCTTCCGCAGGTTCACCTACGGAAACCTTGTTATGACTTTTA
>72e74f1d35a6b7f66e1d215cdade8bad
AAAGTCGTAACAAGGTTTCCGTAGGTGAACCTGCGGAAGGATCATTACAGAGTTCATGCCCTCACGGGTAGACCTCCCACCCTTGAATATACTACCTTCGTTGCTTTGGCGAGCCGCTTCGGCTACCGACCTTGGTTGGTACGCGCTCGCCGGAGAACACCAAACTCTGAATTAATTTGTCGTCTGAGTACTATATAATAGTTAAAACTTTCAACAACGGATCTCTTGGTTCT
>873cde2440beb2b84b887bdd741419b4
TAAAAGTCGTAACAAGGTTTCCGTAGGTGAACCTGCGGAAGGATCATTAACAAATCTGCTATGCGGCCGAGCCTTCGGGCTTGACGCATATATTTACCCCGAGCCTGGCAGCAATGCCGGCTTTGGTTGGGCGTGGACGCAAGTTCACTGCTCCGGTTGTGTGAGGGCGCAAGCCACTTGCCAACCACATAGACGATTGTATGTTTGACAGAGTTACAGTTGTAAAACTAAAATGACAACTTTTAACAATGGATCTCTTGGCTCTTG
>b981a75a78a0fcda01015b0f1caf496e
AGAACCAAGAGATCCGTTGTTAAAAGTTTTAATTTATTAATTAAGTTTACTCAGACTGCAAAGTTACGCAAGAGTTTGAAGTGTCCACCCGGAGCCCCCGCCCGAAGGCAGGGTCGCCCCGGAGGCAACAGAGTCGGACAACAAAGGGTTATGAACATCCCGGTGGTAAGACCGGGGTCACTTGTAATGATCCCTCCGCAGGTTCACCTACGGAGACCTTGTTACGACTTT
>90b7eba961dd5f09da6f0976b2bf94f6
GTAAAAGTCGTAACAAGGTCTCCGTAGGTGAACCTGCGGAGGGATCATTACAAGTGACCCCGGTCTTACCACCGGGATGTTCATAACCCTTTGTTGTCCGACTCTGTTGCCTCCGGGGCGACCCTGCCTTCGGGCGGGGGCTCCGGGTGGACACTTCAAACTCTTGCGTAACTTTGCAGTCTGAGTAAACTTAATTAATAAATTAAAACTTTTAACAACGGATCTCTTGGTTCTGGC
>ab5d4db54262a009d0d2117bb96bc630
AAAGTCGTAACAAGGTTTCCGTAGGTGAACCTGCGGAAGGATCATTAGTGAATTATAGGGCGTCTACTTGTAGAGCCTGACCTCCACTTCTAACACTGTGCACTTGATGGCGAGGTAATGAAACTTTCGAGTGAAATTACCTTGCGGCTTCATTTTAAACATTAGTCAAAGTATGTAATGAAATATAAAACAAAAAAAAACTTTCAACAACGGATCTCTTGGCTCT
>a0506ec464b941d2bc9c81e7776cff0d
GAGAGCCAAGAGATCCGTTGTTGAAAGTTTTTTTTTGTTTTAATATTTCATTACATACTTTGACTAATGTTTAAAATGAAGCCGCAAGGTAATTTCACTCGAAAGTTCCATTACCTCGCCATCAAGTGCACAGTGTTAGAAGTGGAGGTCAGGCTCTACAAGTAGACGCCCTATAATTCACTAATGATCCTTCCGCAGGTTCACCTACGGAAACCTTGTTACGACTTTT
>ae86f90f5a9a12d900f552d8dc348d81
AGAGCCAAGAGATCCGTTGTTGAAAGTTTTTTTTTATTTCGATATTTCGTTACATACTTTGACTGGTGTTTAAAATGAGCCGTAAGCACTTCACTCGCCCGGCCGAAGCCGGGGTCGTTCGTTGCTCACCAATAAAATGCACAGAGTTAGAAAGTGGAGGTCAGGCTCGTCACCGAAGTGAACGACGCCCTATAATTCACTAATGATCCTTCCGCAGGTTCACCTACGGAAACCTTGTTACGACTTT
>250e79d3237cfe8d3671564af4e0ec7d
AAAGTCGTAACAAGGTTTCCGTAGGTGAACCTGCGGAAGGATCACTAGTGATTAAATCGAGAGCGTCTTCATTGACCTCTCACCCTTCACATCCACATACACCTGTGCACCGTTTGGCTCTTATAAAAGACGAAAGTCTGAAATGAGAGTCATCAATTTTATACATACCCCAGTCTTATGAATGTAACAGTTTTAATAAACATAATAAAACTTTTAACAACGGATCTCTTGGTTCT
>671909ce789eddf650aeb5159804dd9a
GCCAGAACCAAGAGATCCGTTGTTGAAAGTTTTAACTTATTATATATTACTCAGACGACAATATTCAGAGTTTAGGGGTCTCTGGCGGGCACGAGCCAGCTTGCGCCAGCAGCCGTGAGGCAGGCCCGCCAAAGCAACAAAGTATGATAAACAAAGGGTGGGAGATCTACCCCGAAGGGCAAGTTCTCTTTAGTGATCCTTCCGCAGGTTCACCTACGGAAACCTTGTTACGACTTTTAC
>de0351d5eef24cb6c5d2a04680604165
CGAGAACCAAGAGATCCGTTGTTAAAAGTTTTATTATGTTTATTAAAACTGTTACATTCATAAGACTGGGGTATGTATAAAATTGATGACTCTCATTTCAGACTTTCGTCTTTTATAAGAGCCAAACGGTGCACAGGTGTATGTGGATGTGAAGGGTGAGAGGTCAATGAAGACGCTCTCGATTTAATCACTAGTGATCCTTCCGCAGGTTCACCTACGGAAACCTTGTTACGACTTTTA
>9f28fbe5c8c9c9687853e6159c5266a9
TAAAAGTCATAACAAGGTTTCCGTAGGTGAACCTGCGGAAGGATCATTAATAATGCTCTCTGGCTTCGGTCAGCTGAGTTCAATGAGTGCCTTCTCTTCGGAGTTGGCCATCCACACACACCGTGAACTGTGGCTTCGGCCATCACAAACTGTTAGTAATGAATGTAATATCATAACAAAAACAAAACTTTTAACAACGGATCTCTTGGCTCTCG
>22b280fea1dba738fb537b158e65a7f1
AAAAGTCGTAACAAGGTTTCCGTAGGTGAACCTGCGGAAGGATCATTGTCGTGACCCTGACCAAAATAGACCGTGCACGCGTTATCCAACCTGTCGGCGGCGGCACCGTCCGTTGCTCGGCCAAGTCCTCGACAACCTCCTCTTCTTTGAGTGGGGGCTCGGGGTAAAAGAACCCACGGCGCCTAAGGCGTCAAGGAACACTGTGCCTAACTCGGGGACGCGGCTGGCTTGCTGGCCGCCCCTCGTGTTGCAATGCTATTTAATCCACATGACTCTCGGCAACGGATATCTCGGCTCTC
>5212868633f708af096f0045925c1a8b
AAAGTCGTAACAAGGTATCCGTAGATGAATCTGCGGATGGATCATTCGTGTAAGTGTTTGGTGAAGGTTGCGCAAGTGACTGGATCCTAATAACTACTTGAATCACTGTGAACTTTGTCACCATTAACGTGACCCAGCAGCGTTGGCGTCTCTCGGGATGCCAACCAGAAGCGGGCACTGGGGCTTTTGTTAACCACACCAACAATTCTTGAATGCCTAAAAACAATTCAATTTATACAACCTTTAACAATGGATCTCTTGGCTCC
>4c4604b81a4847e7066962863b27c4f0
AAAGTCGTAACAAGGTCTCCGTAGGTGAACCTGCGGAGGGATCATTACAAGTGACCCCGGTCTTACCACCGGGATGTTCATAACCCTTTGTTGTCCGACTCTGTTGCCTCCGGGGCGACCCTGCCTTCGGGCGGGGGCTCCGGGTGGACACTTCAAACTCTTGCGTAACTTTGCAGTCTGAGTAAACTTAATTAATAAATTAAAACTTTTAACAACGGATCTCTTGGTTCT
>1832f7bb8b108ea2467ff7f3b3282e2e
CGAGAGCCAAGAGATCCGTTGTCAAAAGTTGTTTATATTTTTATATAATTTCAGACAAGTTGATATGGTTTGTTAAAAAGTTTGGCAGCCTAAACCAAGGTTTAAACTACCAAAAGACAATATAGTGCACAAGAGGTGAATTTGGCAATGAGGACTCCTTTCGGTATCAACTCAGAGACCAAGTATCAGTAATGATCCAACCGCAGGTTCACCTACGGTTACCTTGTTACGACTTTTA
>25f195b5560aefff840f5e63b54247f1
GTAAAAGTCGTAACAAGGTTTCCGTAGGTGAACCTGCGGAAGGATCATTACCGAGAGTGGAGCCTAGCTCCGGGGGGCCAACCGCCCCCACCTCTTCACCCATGTGGACATTTCCGCGTTGCTTTGGCGAGCCCTGGGGTGTTCCCCGAGGGCATTCGCCAGAGGCCTAATCAATTGCCGTTTATAATTGTCATCTGAGTGAAAACCACAATCGTTAAAAACTTTCAACAACGGATCTCTTGGCTCTGGC
>8d8e7c3d4235f003e3ba061db3818add
AAGTAAAAGTCGTAACAAGGTAACCGTAGGTGAACCTGCGGTTGGATCATTACCAATTGACGAAAGTCTATAAACCTGTGCATCAATGCTGTTTCTGGAGCGCGTCTCGGCGTGCTCCAAACTACCAAATCTAATATGCGTCTTTATAAAGTGAAAGCTAAACAACTTTTGACAACGGATCTCTTGGCTCTCGCATCGATGAAGAA
>2ac1e338342222074924769c4f64fc1c
AGAACCAAGAGATCCGTTGTTGAAAGTTTTAACTATTATATAGTACTCAGACGACAAATTAATTCAGAGTTTGGTGTTCTCCGGCGAGCGCGTACCAACCAAGGTCGGTAGCCGAAGCGGCTCGCCAAAGCAACGAAGGTAGTATATTCAAGGGTGGGAGGTCTACCCGTGAGGGCATGAACTCTGTAATGATCCTTCCGCAGGTTCACCTACGGAAACCTTGTTACGACTTT
>2170a0042c3405284e64b45ca64f2cd8
GAGAGCCGAGATATCCGTTGCCGAGAGTCATGTGGATTAAATAGCATTGCAACACGAGGGGCGGCCAGCAAGCCAGCCGCGTCCCCGAGTTAGGCACAGTGTTCCTTGACGCCTTAGGCGCCGTGGGTTCTTTTACCCCGAGCCCCCACTCAAAGAAGAGGAGGTTGTCGAGGACTTGGCCGAGCAACGGACGGTGCCGCCGCCGACAGGTTGGATAACGCGTGCACGGTCTATTTTGGTCAGGGTCACGACAATGATCCTTCCGCAGGTTCACCTACGGAAACCTTGTTACGACTTTT
>525e4a9a99fac9880d7405dad7ee3d66
GTAAAAGTCGTAACAAGGTTTCCGTAGGTGAACCTGCGGAAGGATCACTAGTGATTAAATCGAGAGCGTCTTCATTGACCTCTCACCCTTCACATCCACATACACCTGTGCACCGTTTGGCTCTTATAAAAGACGAAAGTCTGAAATGAGAGTCATCAATTTTATACATACCCCAGTCTTATGAATGTAACAGTTTTAATAAACATAATAAAACTTTTAACAACGGATCTCTTGGTTCTCGC
>576669fc444aaf1e5fb9723d3b31004e
CAAGAGCCAAGAGATCCATTGTTAAAAGTTGTCATTTTAGTTTTACAACTGTAACTCTGTCAAACATACAATCGTCTATGTGGTTGGCAAGTGGCTTGCGCCCTCACACAACCGGAGCAGTGAACTTGCGTCCACGCCCAACCAAAGCCGGCATTGCTGCCAGGCTCGGGGTAAATATATGCGTCAAGCCCGAAGGCTCGGCCGCATAGCAGATTTGTTAATGATCCTTCCGCAGGTTCACCTACGGAAACCTTGTTACGACTTTTA
>57a0cee4d30c100fe338348ac8659d13
AAAGTCGTAACAAGGTAACCGTAGGTGAACCTGCGGTTGGATCATTAATAAATTGTAAAGCAAAGGTTAGGCAGGCTCGATTAACGTTGGGTCTGGCCTTTGTCTTTTTAACATTATGTGAACTGTTTATTGTCTCTGGTAGGGCTTAAAGGATAATTGCTTCTGGAGGTTTTCTTTTTAACTAAGGAAAATCTTTACCTACTGATAAAATCTTTATACTCGTTTTTTACTACTTAGTCTTGAATTGAATTTGATATTTAAATATGTTAATTTTAAACAACTTTTGACAACGGATCTCTAGGCTCT
>3371d218afbf04f0593b42235a66e340
TAAAAGTCGTAACAAGGTAACCGTAGGTGAACCTGCGGTTGGATCATTACTGATACTTGGTCTATGAGTTGATACCGAAAGGAGTCCTCATAGCCAAATTCACCTCTTGTGCACTATATTGTCTTTTGGTAGTTTATACCTTGGTATAGGCTGCCAAACTTTATAACAAACCATAAAAACTTGTCTGAAATTATAATAAAATATAAACAACTTTTGACAACGGATCTCTTGGCTCTCG
>3e9d0d90d03e82f6fb82e0291f4a2afe
CGAGAGCCAAGAGATCCGTTGTTGAAAGTTGTATTTTGAATTAAGTATTCATAATAGTTTTTCAGACAAAGTGGTTCAAGGTTATAGGTTGGTGTAGGTGTATATTACTATACACAACATTGCACACAAGGTGAGTACTATTTTTAAAAAGTGCAGTAAAACACTTATTATGAATGATCCTTCCGCAGGTTCACCTACGGAAACCTTGTTACGACTTTTA
>241cc8f8893d0a7225dc9368e3f83747
GCCAGAACCAAGAGATCCGTTGTTGAAAGTTTTAACTATTATATAGTACTCAGACATCATGTATTTCAAGAGTTGTGGTCCTCTGGCAGGCACTCAGCAGCCGAAGCCGCTGGCACGAGGCGTCCTGCCAAAGCAACAAAGGTAATTTATACAAGGGTGGAGGTCTGAACCGAGCTTCTCCGAGAGGCCCGACGTCTCTAAACCCTCCGAGGAGGGTAACCCCCAGGATTGCTCCCGGGGCGCTGACTGTTCATTGCTCTATTAATGATCCTTCCGCAGGTTCACCTACGGAAACCTTGTTACGACTTTTAC
>52d498dc8bbc7b71ba6da0e020c1486c
GCCAGAACCAAGAGATCCGTTGTTGAAAGTTTTAACTATTATATAGTACTCAGACATTATAGACAAACAGAGTTTAGGTCCTCTGGCAAGCGCTCGCCGGCCGGAGCCAGCAGCCCGAGGGCAGGCTTGCCAAAGCAACAAAGTGTAATAAACAAAGGGTGGTAGGTTACCCGAGAGGCCTTGCGGCAACCCGGGTGACTACTGTAATGATCCTTCCGCAGGTTCACCTACGGAAACCTTGTTACGACTTTTAC
>4581baf9fa8a11a11ee1370841fe562a
AGAGCCGAGATATCCGTTGCCGAGAGTCATGTGGATTAAATAGCATTGCAACACGAGGGGCGGCCAGCAAGCCAGCCGCGTCCCCGAGTTAGGCACAGTGTTCCTTGACGCCTTAGGCGCCGTGGGTTCTTTTACCCCGAGCCCCCACTCAAAGAAGAGGAGGTTGTCGAGGACTTGGCCGAGCAACGGACGGTGCCGCCGCCGACAGGTTGGATAACGCGTGCACGGTCTATTTTGGTCAGGGTCACGACAATGATCCTTCCGCAGGTTCACCTACGGAAACCTTGTTACGACTTT
>3f1a10c52a34cc710eb26163b046580f
GCGAGAGCCAAGAGATCCGTTGTTGAAAGTTTTTTTTTGTTTTAAATTTCTTTACATACTTTGACTAATGTTTAAAATGAAGCCGAAAGGTTCTCTTCATAAGCCCGAAGGCTCAATCTAATTACCTTTCCATCAAGTGCACAGTGTTAGAAGTGGAGGTCAGGCTCTACAAGTAGACGCCCTATAATTCACTAATGATCCTTCCGCAGGTTCACCTACGGAAACCTTGTTACGACTTTTAC
>fb0af27ab8bb2aa76d45575aa14a1170
CAGAGCCAAGAGATCCGTTGTTGAAAGTTTTAAATATTAAACTTTTTACTCAGACGACACTAATATTCAGGGTTTTGGGTCCTCTGGCGGGCACTTACCAGCCGAAGCCAGTAGCTAGGCGGCCCGCCAAAGCAACAGAGGTATGGTATACAAAGGGTGGGAGATCTACCCCGAAGGGCATGAACTCGGTAATGATCCTTCCGCAGGTTCACCTACGGAAACCTTGTTACGACTTTT
>e18dad22850c513785a129871f3626e6
GCGAGAGCCAAGAGATCCGTTGTTGAAAGTTTTTTTTTGTTTTAATATTTCATTACATACTTTGACTAATGTTTAAAATGAAGCCGCAAGGTAATTTCACTCGAAAGTTCCATTACCTCGCCATCAAGTGCACAGTGTTAGAAGTGGAGGTCAGGCTCTACAAGTAGACGCCCTATAATTCACTAATGATCCTTCCGCAGGTTCACCTACGGAAACCTTGTTACGACTTTTAC
>4b45f62ef1c3f469f60eb3c389ba1fd8
GGGAGAACCAAGAGATCCGTTGTCGAAAGTTGTGTATAGTTTGTTGGCCAGTGACGGTCCAACCAAGTTCCACGTTCATACTAACCATTCGAGTTTGTAGCGAAGAAAGACCCCAAGAGAGGCCACAAAAAACTTCTCTGAAGCCTTTCTCCAAGACAGTGCACACGGGTTTGTGGATGTATAGTGGGTGTAGGCGGCCAGGGACACTTTTTGGCGTCCGTATGGCCTGCCCAAATCTTCACTAATGATCCTTCTGCAGGTTCACCTACAGAAACCTTGTTACGACTTTTAC
>c4533369ad9144cb036cf6dc4ca358a8
AAAAGTCGTAACAAGGTTTCCGTAGGTGAACCTGCGGAAGGATCATTACAAAATATGACTGTGGCTGCAGTGGAGTAGAATTGTGCAAGCGTTCTGCTCCCTCAGTTACTTGAGCCCACTCCCGAAAGGGAGATGGACAGCACACTTTGTGTGTGACATAGACTTTAAATCATGACTTATTTCATTATTAAATAACCAAAACTTTTAACAATGGATCTCTTGGCTCTT
>dc183fc29cb5e3f0683cbaaa99e509b1
AAAAGTCGTAACAAGGTTTCCGTAGGTGAACCTGCGGAAGGATCATTACAAAATTAAGATTGTGTGCGTGAGAGTTGGGGTGTTAGTGGGGTGAGTTGTACGAGTAATATTGTGCAGTTTGTCGTGTAACACGCCACTTTGCGTGGCACTAGGCCCACTCCTGAAAGGGAGATGGTAGCATGCTTCGGTGTGCAAATAAACATTAAATCATGACTTTTACCAAGAAAAAGTAAATAACCAAAACTTTTAACAATGGATCTCTTGGCTCTT
>c54402bf8203177da24961a89c04af73
AGAACCAAGAGATCCGTTGTTAAAAGTTTTATTATGTTTATTAAAACTGTTACATTCATAAGACTGGGGTATGTATAAAATTGATGACTCTCATTTCAGACTTTCGTCTTTTATAAGAGCCAAACGGTGCACAGGTGTATGTGGATGTGAAGGGTGAGAGGTCAATGAAGACGCTCTCGATTTAATCACTAGTGATCCTTCCGCAGGTTCACCTACGGAAACCTTGTTACGACTTT
>4641316acf9c811d9c198bc4a35c4d13
CAGGTCGTAACAAGGTTTCCGTAGGTGAACCTGCGGAAGGATCATTCACAATAAGTGTTTTATGGCACTTTTTAAAATCCATACCCACCTTGTGTGCAATGTTGGGTCGTCCATCAAGTAGTTTACGCTACAGCGACGGATGGCTTTTAACTAAACTCTTATTCTCATAACGAATCTGTCTGATAACATATTTTCGAATTTACTTAATTCAAATAAATACAACTTTCAACAACGGATCTCTTGGCTCT
>428144da694b75bfe471ae7faa89bc86
AGAACCAAGAGATCCGTTGTTGAAAGTTTTAACTATTATATAGTACTCAGACAGTATAGACAAACAGAGTTTAGGTCCTCTGGCAAGCGCTCGCCGGCCGGAGCCAGCAGCCCGAGGGCAGGCCTGCCAAAGCAACAAAGTGTAATAAACAAAGGGTGGTAGGTTACCCGGGAGGCCTTGCGGCATCCCGGATGACTACTGTAATGATCCTTCCGCAGGTTCACCTACGGAAACCTTGTTACGACTTT
>5402b0311a7b0305d9983e3f3f6e1142
GTAAAAGTCGTAACAAGGTTTCCGTAGGTGAACCTGCGGAAGGATCATTACAGAGTTCATGCCCTCACGGGTAGACCTCCCACCCTTGAATATACTACCTTCGTTGCTTTGGCGAGCCGCTTCGGCTACCGACCTTGGTTGGTACGTGCTCGCCGGAGAACACCAAACTCTGAATTAATTTGTCGTCTGAGTACTATATAATAGTTAAAACTTTCAACAACGGATCTCTTGGTTCTGGC
>ea17cb58d527f0198b4d14c9072726a8
CGAGAGCCAAGAGATCCGTTGTCAAAAGTTGTTTATATTTTATTATAATTTCAGACAAGTTTTTATGGTTTGTTATAAAGTTTGGCAGCCTATACCAAGGTATAAACTACCAAAAGACAATATAGTGCACAAGAGGTGAATTTGGCTATGAGGACTCCTTTCGGTATCAACTCATAGACCAAGTATCAGTAATGATCCAACCGCAGGTTCACCTACGGTTACCTTGTTACGACTTTTA
>b3b4d745eac85c6089f8d306e789d71f
AAAAGTCATAACAAGGTTTCCGTAGGTGAACCTGCGGAAGGATCATTAATAGTGCCCTCTGATGCAAATCATTGGGTTAGATCTGCTCTCTTCGCAAGAAGAGGGTTTCCATACACACCGTGAACTGTGGCTTCGGCCATCACAAACTGTTAGTAATGAATGTAATATCATAACAAAAACAAAACTTTTAACAACGGATCTCTTGGCTCTC
>d213b7e319517f9944aeabe540f54ce4
TAAAAGTCGTAACAAGGTTTCCGTAGGTGAACCTGCGGAAGGATCATTGACACTATCCAAACCTCAAACCTATCGTGAATTTGTATAACCCCTTAAGAGTTGTCGCCGTGAAACAGTTGGCCTGTTGATGCACAGAGATTTTTTTTAATAAAATGGTTACTCTGTGTGTTGGCGTCGTGCTGCTGTTGAACATTGTCGAGGACTCTGCCTTTCAACCAACTTATTTCTTTATAACCCAATTAACCCTTTGCTCTGAACTTAACAACTATTGTTATATTTATTTTAACAAAAGAACAACTCTTAGCAACGGATATCTTGGTTCACG
>842f3cf8c8a632da08419fc40955085f
CAGAACCAAGAGATCCGTTGTTGAAAGTTTTAACTATTATATAGTACTCAGACAGTATAGACAAACAGAGTTTAGGTCCTCTGGCAGGCGCTCGCCGGCCGGAGCCAGCAGCCCGAGGGCAGGCCTGCCAAAGCAACAAAGTGTAATAAACAAAGGGTGGTAGGTTACCCGGGAGGCCTTGCGGCGTCCCGGGCGACTACTGTAATGATCCTTCCGCAGGTTCACCTACGGAAACCTTGTTACGACTTTT
>192a0672159fb85f6281fa3f9dfd239b
TAAAAGTCGTAACAAGGTTTCCGTAGGTGAACCTGCGGAAGGATCATTAACAAATCATGTTGCTACCAGAGCTGGTCCCCTTTGGGGATCGTTCTGGTATGCATATATAAACCCGAACCCGTGCGGTAAAATGCCGGGCAAGGTGTTATCGGCCTGGTGCGAGCCATGGCTGGTAGCGGAGAGGCGCAAGCCGATCCACATAGACGCTTGTATATGTTTGACAGAGTATGATACACTTATTAAAATGACAACTTTTAACAATGGATCTCTTGGCTCTTG
>d54eef8ed9c52a51f22dcc2f7d38c8d7
GTAAAAGTCGTAACAAGGTTTCCGTAGGTGAACCTGCGGAAGGATCATTCTTGATAAAAGCAACTTTGCTTATTTAACTTGTGAACTGTTACCCGCAATTTGGCATCCGAAAGGCTGTCAGGTGGCATATTATTTACATTTACTTATTTGTACCAGTATTAATTACTTGAACAAAACTTTTAACAATGGATCTCTAGGCTCTCGC
>6642f7812a638aceb6ca859693464be8
GTAAAAGTCGTAACAAGGTTTCCGTAGGTGAACCTGCGGAAGGATCATTAGTGAATATTAGCGCATCTACTTGTAGAGCGTGACCTCCACTTTCTAACTCTGTGCATTTATTGGCGGATGAATTGGTGAAAGCCTTGACATCTCGCGGCTCATTTTATAACACTAGTTAAAGTATGTAACGAAATATCGAAACAAAAAAAAACTTTCAACAACGGATCTCTTGGCTTGCGC
>2a42ef22be721edeb6195df8d4f0c9fe
AAAGTCGTAACAAGGTTTCCGTAGGTGAACCTGCGGAAGGATCATTACAGTAGTCATCCGGGATGCCGCAAGGCCTCCCGGGTAACCTACCACCCTTTGTTTATTACACTTTGTTGCTTTGGCAGGCCTGCCCTCGGGCTGCTGGCTCCGGCCGGCGAGCGCTTGCCAGAGGACCTAAACTCTGTTTGTCTATACTGTCTGAGTACTATATAATAGTTAAAACTTTCAACAACGGATCTCTTGGTTCT
>c210939c6eb8690a2724a975978c0e08
CAGGTCGTAACAAGGTTTCCGTAGGTGAACCTGCGGAAGGATCATTAAAAAATATAGAATTAATCTTCTGTAAACCCAATCTGCGTATTTCTACCTGTTGCTTTCGTGAGACTGCGAACGCAAGTTCCCTCTGGCGCTGTTTTTAGGAACAGCTGTTGGGGAGTGCTCACGGGAGGTAATTATAAACTCTGTTTTTTTTGAATTTTGTCTGAATATTGTTTATACATAAACTTTAAAACTTTCAACAACGGATCTCTTGGTTCT
>504722a326e486bcf5b5b4a943bdae94
AAAAGTCGTAACAAGGTTTCCGTAGGTGAACCTGCGGAAGGATCATTAACACGTATCCTACGTATTAATAAACACCTGTGAACTTCATAACTTAAACGTCGTGACCGGTAAAACGGAAGCGATGACCCCGGGTCACACCCTCTTTTTGGAGGTGACCTTATAACTCTTTTTTATACAACCCATTCCAAATTTGATCGACTTTAATCTCACTAGGCTTGAAACCCTAGCGATATTACGAAATTCCGAACAACTCTTAGCAACGGATATCTTGGTTCTC
>d238b989cf288593d10f523342be1a36
GTAAAAGTCATAACAAGGTTTCCGTAGGTGAACCTGCGGAAGGATCATTAATAGTGCCCTCTGATGCAAATCATTGGGTTAGATCTGCTCTCTTCGCAAGAAGAGGGTTTCCATACACACCGTGAACTGTGGCTTCGGCCATCACAAACTGTTAGTAATGAATGTAATATCATAACAAAAACAAAACTTTTAACAACGGATCTCTTGGCTCTCGC
>4a0835918f69a803fd6a53a712de1e02
GCCAGAACCAAGAGATCCGTTGTTGAAAGTTGTAACTATTAAGTTTTTTCAGACGCTGATTGCAACTGCAAATGGTTTAAATTGTCCAATCGGCGGGCGGACCCGCCGAGGAAACGTAAGGTACTTAAAAGACATGGGTAAGAGATAGCAGGCAAAGCCTACAACTCTAGGTAATGATCCTTCCGCAGGTTCACCTACGGAAACCTTGTTACGACTTTTAC
>b9d3dacb8de60568a363b696fe668e58
CGAGAGCCAAGAGATCCGTTGTTGAAAGTTTTTTTATATTTATATATTTCATTTTACATTCTTTGACTAGTGTTTAAAGTGAGCCGCAAAACTTATTTATATATAAAAAGATAAACTCTAAATATTTTTTCGTAATGCCAAAATGGTGCACAGAGTTAAGAAAGTGGGGGTCAAGCTGCGCGAAGCACACTCTAAATTCACTAATGATCCTTCCGCAGGTTCACCTACGGAAACCTTGTTACGACTTTTA
>878342590a56ee4e8166ceff3ea6c11d
GCGAGAGCCAAGAGATCCGTTGTTAAAAGTTTTGTTTTTGTTATGATATTACATTCATTACTAACAGTTTGTGATGGCCGAAGCCACAGTTCACGGTGTGTATGGAAACCCTCTTCTTGCGAAGAGAGCAGATCTAACCCAATGATTTGCATCAGAGGGCACTATTAATGATCCTTCCGCAGGTTCACCTACGGAAACCTTGTTATGACTTTTAC
>b2fc0399c5ed3022ef5fd3334060dd75
CCAGAACCAAGAGATCCGTTGTTGAAAGTTTTAACTATTTTTTAGTACTCAGACGACATTTAATACAGAGTTGTGGTCCTCTGGCGGGCACGATCCAGCCGAAGCCGGTGCTTGCGCGGCCCACCAAAGCAACAAATTGAGATAATCAAGGGTTAGAAGGACCGGTTTCCCGGCTTCATTTTTAATGATCCTTCCGCAGGTTCACCTACGGAAACCTTGTTACGACTTTTA
>ddb4e3230238c7f54ca422f960f3650c
GCGAGAGCCTAGAGATCCATTGTTAAAAGTTTTGTTCAAGTAATTAATACTGGTACAAATAAGTAAATGTAAATAATATGCCACCTGACAGCCTTTCGGATGCCAAATTGCGGGTAACAGTTCACAAGTTAAATAAGCAAAGTTGCTTTTATCAAGAATGATCCTTCCGCAGGTTCACCTACGGAAACCTTGTTACGACTTTTAC
>0229bde135374e4f1bbc6e239f7e0868
GAGAGCCAAGAGATCCGTTGTTAAAAGTTTTGTTTTTGTTATGATATTACATTCATTACTAACAGTTTGTGATGGCCGAAGCCACAGTTCACGGTGTGTATGGAAACCCTCTTCTTGCGAAGAGAGCAGATCTAACCCAATGATTTGCATCAGAGGGCACTATTAATGATCCTTCCGCAGGTTCACCTACGGAAACCTTGTTATGACTTTT
>31c99bfe069ec43719a4b1afb65edff0
GCGAGAGCCAAGAGATCCGTTGTTGAAAGTTTTTTTATATTTATATATTTCATTTTACATTCTTTGACTAGTGTTTAAAGTGAGCCGCAAAACTTATTTATATATAAAAAGATAAACTCTAAATATTTTTTCGTAATGCCAAAATGGTGCACAGAGTTAAGAAAGTGGGGGTCAAGCTGCGCGAAGCACACTCTAAATTCACTAATGATCCTTCCGCAGGTTCACCTACGGAAACCTTGTTACGACTTTTAC
>a66ee3b0eb3ca8f274b8766ea2c04846
TAAAAGTCGTAACAAGGTATCTGTAGGTGAACCTGCAGATGGATCATTAATGTAATTGTTTATGGGAGGTGTGCTTGACTGTATAGTCAAGTCATTAACCTAAATATTACCCTGATAACTTGCGAAGATGTTAGTTTGGTATTGGTAGTGTGAAAGGCGTAAGCTATTCTAACTACTGGTGTCACGCTACTGTCTTTTTATTATAAACAACCAACCAACTTTTAACAAATTATCACAACCAAAATCTAATTTTAAACAACCTTTAACAATGGATCTCTTGGTTCCTG
>29f5c32a6f212bc1ad734a204b1e4950
CGAGAACCAAGATATCCATTGTTAACAGTTGTTCGGTTTTTTTTTAAGGTCAACGGATTAACGCGACCTAGCTACGAAACTGTGGGGTTAAATAATAAAGGGGCATGGTGGCCCGAGCACCCTAGTCGCCTGGACGTGATGTTCCGAGCGAAACCGTGGGGCCTTCTCAAAAGAGAAGCTAAGGTGCGGAGTAATGTGAAAGTTCACAGGGGGTATAACGTTGGATACGTGTTAATGATCCTTCCGCAGGTTCACCTACGGAAACCTTGTTACGACTTTTA
>d3d005fb57d4057d8b4bc0c5e28eb1da
GATGCGAGAGCCAAGAGATCCGTTGTCAAAAGTTGTTTAGCTTTCACTTTATAAAGACGTATATTAGATTTGGTAGTTTGGAGCACGCCGAGACGCGCTCCAGAAACAGCATTGATGCACAGGTTTATAGACTTTCGTCAATTGGTAATGATCCAACCGCAGGTTCACCTACGGTTACCTTGTTACGACTTTTACTTCCTCTAAATGA
>c9bdf3dd1d75e6cb377e0c5c9ddf70b2
CCAGAACCAAGAGATCCGTTGTTGAAAGTTTTAACTATTATATAGTACTCAGACAATATTAACAAACAGAGTTTTGGTATCCTCGACAGTCACTGACCAGCCGGAGCCGGTGGGCCGAAGCCGGGACTGCCAAAGCAACAAAGGTAAATAAACAATGGGTGGGAGGTATACCCCGAAGGGCAACGTCTCTTTAATGATCCTTCCGCAGGTTCACCTACGGAAACCTTGTTACGACTTTTA
>1cac746ef7ceced70e2f6443fd876345
GAGAGCCAAGAGATCCGTTGTTGAAAGTTTTTTTTTGTTTTTTATTTCATGACATACTTTGACTAATGTTTAAAATGAAGCCGCAAGGTAGTTTCACTCGAAAGTTCCATTACCTCGCCATCAAGTGCACAGTGTTAGAAGTGGAGGTCAGGCTCTACAAGTAGACGCCCTATAATTCACTAATGATCCTTCCGCAGGTTCACCTACGGAAACCTTGTTACGACTTTT
>002adacc8576de0520b8c7872ffd1590
GTAAAAGTCGTAACAAGGTCTCCGTAGGTGAACCTGCGGAGGGATCATTACAGAGTTCATGCCCTTACGGGTAGATCTCCCACCCTATGTTATTATTACTTTGTTGCTTTGGCGGGCCGTCAGGCTCACGCCCGGCTACCGGCCCCGGCTGGTAAGCGCCCGCCAGAGGACCCAAAACCCTGATTATTAGTGTCGTCTGAGTACTATATAATAGTTAAAACTTTCAACAACGGATCTCTTGGTTCTGGC
>280f4c07e451e4cc7051890fb922465f
TAAAAGTCGTAACAAGGTTTCCGTAGGTGAACCTGCGGAAGGATCACTAGTGATTAAATCGAGAGCGTCTTCATTGACCTCTCACCCTTCACATCCACATACACCTGTGCACCGTTTGGCTCTTATAAAAGACGAAAGTCTGAAATGAGAGTCATCAATTTTATACATACCCCAGTCTTATGAATGTAACAGTTTTAATAAACATAATAAAACTTTTAACAACGGATCTCTTGGTTCTCG
>a9a0caf15ecf1429575beea2a6c68f01
GCCAGAACCAAGAGATCCGTTGTTAAAAGTTTTAATTTATTAATTAAGTTTACTCAGACTGCAAAGTTACGCAAGAGTTTGAAGTGTCCACCCGGAGCCCCCGCCCGAAGGCAGGGTCGCCCCGGAGGCAACAGAGTCGGACAACAAAGGGTTATGAACATCCCGGTGGTAAGACCGGGGTCACTTGTAATGATCCCTCCGCAGGTTCACCTACGGAGACCTTGTTACGACTTTTAC
>9147d02305a0e7d1959960a55f9292d0
AAGAGCCTAGAGATCCATTGTTATAAGTTGTACAAGTTTTTAATCTTCATCCTGAGAGATGCAGACAAGATACAATTGAGCAACAAGGAAACACTCGTTTAACAGCCCAGGTGGCGGTGCAGTGCGTCTTGCGACACAGCCACGCCCGCCCACTGGGGAACATTTCAACGTGGTCTCGGATAAGGAGACGTGATGGATTTGTAATGATCCTTCCGCAGGTTCACCTACGGAAACCTTGTTACGACTTTT
>b0341952b939095cbb179cba37cedfcd
TAAAAGTCGTAACAAGGTTTCCGTAGGTGAACCTGCGGAAGGATCATTAGTGAATTTAAGGGCGTAGACTTCGGTCTGGCCTGAACCCCCACTTTCTAACTCTGTGCATTTTATCGGTGGAGGACTTGGACAAGAGGTAATAACGGACTTCGGTTGAATCCGTATGACCCTCGAATCCTATGTCTTCTACGGCTCATTTTATAACACTAGTCAAAGTATGTAACGAAATATCGAAATAAAAAAAAACTTTCAACAACGGATCTCTTGGCTCTCG
>9faa750897243ecd31dd865a67e03303
GTAAAAGTCGTAACAAGGTTTCCGTAGGTGAACCTGCGGAAGGATCATTATCGAGTGCGGGTCCTCTGGGCCCCATCTCCAACCCTTGTCTATCTTACCACGTTGCTTTGGCGGGCCCGTCCTTCACCGGATCGCCCGAGGGTCTCTCCCCTCCCGCCCGTGCCCGCCAGTAGCCCCCCCAAATTCTATAACAGTGATGTCTGAGTCTTAACAAGCAATAAGTAAAACTTTCAACAACGGATCTCTTGGTTCTGGC
>6f83425edcc4f8c947ff28f618b7228d
TAAAAGTCGTAACAAGGTAACCGTAGGTGAACCTGCGGTTGGATCATTACTGATACTTGGTCTATGAGTTGATACCGAAAGGAGTCCTCATAGCCAAATTCACCTCTTGTGCACTATATTGTCTTTTGGTAGTTTATACCTTGGTATAGGCTGCCAAACTTTATAACAAACCATATAAACTTGTCTGAAATTATAATAAAATATAAACAACTTTTGACAACGGATCTCTTGGCTCTCG
>3b9042f0c92b3c8bb0e62e6d44f6c1b0
GTAAAAGTCGTAACAAGGTTTCCGTAGGTGAACCTGCGGAAGGATCATTAGTGAATTATAGGGCGTCGTTCACTTCGGTGACGAGCCTGACCTCCACTTTCTAACTCTGTGCATTTTATTGGTGAGCAACGAACGACCCCGGCTTCGGCCGGGCGAGTGAAGTGCTTACGGCTCATTTTAAACACCAGTCAAAGTATGTAACGAAATATCGAAATAAAAAAAAACTTTCAACAACGGATCTCTTGGCTCTCGC
>f755bbbe27ccb7b10a8d60b5e7ac2252
CCAGAACCAAGAGATCCGTTGTTGAAAGTTTTAGGTTACGGTTACGTTTTAGAGACGTCGTCCATAGTCAAAGAATAGGGAGGAAAAGATCGACTGGCCACCGGACGGCGCCCCGGGGGACGCGGACGTACCGCGTTCCGGGGGCACGTCTCCGCGGCGACAGTGAGGTAGAATAGGCACGGATGGGAGATGGGGCCCCGAGGGGGACCCGCACTCGGTAATGATCCTTCCGCAGGTTCACCTACGGAAACCTTGTTACGACTTTTA
>b6290de710f849045e793699d56791d1
TAAAAGTCGTAACAAGGTTTCCGTAGGTGAACCTGCGGAAGGATCATTACCGAGTGCGGGTCCCCCTCGGGGCCCCATCTCCCATCCGTGCCTATTCTACCTCACTGTCGCCGCGGAGACGTGCCCCCGGAACGCGGTACGTCCGCGTCCCCCGGGGCGCCGTCCGGTGGCCAGTCGATCTTTTCCTCCCTATTCTTTGACTATGGACGACGTCTCTAAAACGTAACCGTAACCTAAAACTTTCAACAACGGATCTCTTGGTTCTGG
>1b4e65db1bb0e48894ef309e6638f662
GCCAGAACCAAGAGATCCGTTGTTGAAAGTTTTAACTATTATATAGTACTCAGACAATATGATTAAACAAGAGTTTTAGGTTCTCTGGCAGGCGCGGACCAGCCGAAGCCAGTGGTCACAAGGACGGGCCTGCCAAAGCAACAAAGGTAATGTAAACAAAGGGTGGAGTATTAGGGTGTAAGCCCATAATGACTCTTTAATGATCCTTCCGCAGGTTCACCTACGGAAACCTTGTTACGACTTTTAC
>91a509de7765d6d3303db0e8b7ff2a10
GTAAAAGTCGTAACAAGGTTTCCGTAGGTGAACCTGCGGAAGGATCATTAAAGAGTCATTATGGGCTTACACCCTAATACTCCACCCTTTGTTTACATTACCTTTGTTGCTTTGGCAGGCCCGTCCTTGTGACCACTGGCTTCGGCTGGTCCGCGCCTGCCAGAGAACCTAAAACTCTTGTTTAATCATATTGTCTGAGTACTATATAATAGTTAAAACTTTCAACAACGGATCTCTTGGTTCTGGC
>727d9ebad347bbf9d64416ac98d97663
GCGAGAGCCAAGAGATCCGTTGTTGAAAGTTTTTTTATTTTTTCGATATTTTGTATACATACTTTAACTAAATGTTTAAAAGTGAGCCGCAGACAATAATTTCACTTCAAGTTGCCTATCAGTTGAGTCATCATCCGCCAATGAGTGCACAATGTTATAAGAGTGGAGGTCACGCCTTGAATAAACAAGTGCGCTAAAATTCACTAATGATCCTTCCGCAGGTTCACCTACGGAAACCTTGTTACGACTTTTAC
>27b3f9d2ff8f10e2cec069d228e3a155
TAAAAGTCGTAACAAGGTTTCCGTAGGTGAACCTGCGGAAGGATCATTAAGAAACTAGTCGTCCGCGTAGGGGAAACCCGATCATCGCGGTGTAAGCTCACTAGTAACCCTTGAATAAACTACCTTCGTTGCTTTGGTGGGCCGTCGCTTCGGCGGCCAGCGGCTTCGGCTGCTGCGCGCCCGCCAGAGGACCACAACTCTTGTTTTTAGTGATGTCTGAGTACTATATAATAGTTAAAACTTTCAACAACGGATCTCTTGGTTCTGG
>f37634e51a1e9f5f9001952a05b868e1
GGAACCAAGAGATCCGTTGTTGAAAGTTTTAAATAATTTATATTTTCACTCAGACTTCAATCTTCAGACAGAGTTCGAGGGTGTCTTCGGCGGGCGCGGGCCCGGGGGCGTGAGCCCCCCGGCGGCCAGTTAAGGCGGGCCCGCCGAAGCAACAAGGTAAAATAAACACGGGTGGGAGGTTGGACCCAGAGGGCCCTCACTCGGTAATGATCCTTCCGCAGGTTCACCTACGGAAACCTTGTTACGACTTT
>edc0b40e8cd8f8eb4f29dae76e46a77c
AAAGTCGTAACAAGGTCTCCGTAGGTGAACCTGCGGAGGGATCATTACAGAGTTCGTGCCCTTCGGGGTAGACCTCCCACCCGTGTGAACGATACCTTTGTTGCTTTGGTCGGCCGCGGGCCCGCCCGCTACCGGCTCTCTGCTGGTACGCGCCGACCAGAGGCCCCAACTCCTGTTTTCTGTGCCGTCTAAGTCCCATATAATCGTTAAAACTTTCAACAACGGATCTCTTGGTTCT
>0e58cce75ac41eb7b06ead95c50f8cc7
AAAAGTCGTAACAAGGTTTCCGTAGGTGAACCTGCGGAAGGATCATTACAGTAGTCACCCGGGGCGCCGCAAGGCCTCCCGGGTAACCTACCACCCTTTGTTTATTACACTTTGTTGCTTTGGCAGGCCTGCCCTCGGGCTGCTGGCTCCGGCCGGCGAGCGCTTGCCAGAGGACCTAAACTCTGTTTGTCTATACTGTCTGAGTACTATATAATAGTTAAAACTTTCAACAACGGATCTCTTGGTTCTG
>b1b3debf9604be801b56fa449016d364
CGAGAGCCAAGAGATCCGTTGTCAAAAGTTGTTTATATTTTATTATAATTTCAGACAAGTTTATATGGTTTGTTATAAAGTTTGGCAGCCTATACCAAGGTATAAACTACCAAAAGACAATATAGTGCACAAGAGGTGAATTTGGCTATGAGGACTCCTTTCGGTATCAACTCATAGACCAAGTATCAGTAATGATCCAACCGCAGGTTCACCTACGGTTACCTTGTTACGACTTTTA
>2787d9ffa35483f1f1d1f63e538af35e
AAGAGCCAAGAGATCCATTGTTAAAAGTTTTGGTTATTTAATAATGAAATAAGTCATGATTTAAAGTCTATGTCACACACAAAGTGTGCTGTCCATCTCCCTTTCGGGAGTGGGCTCAAGTAACTGAGGGAGCAGAACGCTTGCACAATTCTACTCCACTGCAGCCACAGTCATATTTTGTAATGATCCTTCCGCAGGTTCACCTACGGAAACCTTGTTACGACTTTT
>cdeebc15c73506fc2dddb72314260017
CCGATAGACATTTCACATTCTTTTGGATCGTTTATCGCGCTTTGTTCATGGTCCTTAACAGGAAATATCATGACTTCAGTTTTCGTATAAACGATTCGTACATGTGTAGCGTCTTCTAGGCCTTTTTCGAGATTTTCCTGATGCCTTAGGTCAATAACGGGTTCAACATAGTTTTCGCGTTTTTTGTACGTTCTGTAAGACACAACACGTACGTCCTTATCGCCTATTTGTGCCGGCTTTATTTTTATGCCTTTCCCATTGATTA
>d9538dbf9e23ff43581cf319576d3e3c
GCGAGAACCAAGAGATCCGTTGTTAAAAGTTTTATTATGTTTATTAAAACTGTTACATTCATAAGACTGGGGTATGTATAAAATTGATGACTCTCATTTCAGACTTTCGTCTTTTATAAGAGCCAAACGGTGCACAGGTGTATGTGGATGTGAAGGGTGAGAGGTCAATGAAGACGCTCTCGATTTAATCACTAGTGATCCTTCCGCAGGTTCACCTACGGAAACCTTGTTACGACTTTTAC
>28d18d47d9f037fa8a9ef15402fcff5d
GCCAGAACCAAGAGATCCGTTGTTGAAAGTTTTAGTTTATTTAACTATTTTCAGATTTAACATGGTTAAAAGAATTTATTGAAGGCTATTGACAGGCGCTGGCCAGAGGTTAAACCCCGGCGGTCCAGTTGAAGACGGGCCCGTCAAAGCAACGTAATAATTATACAAAGGGTTGGAGGTCGGGCCTCGGAGACCCTAACTCATTAATGATCCTTCCGCAGGTTCACCTACGGAAACCTTGTTACGACTTTTAC
>ce7f0ced742b9a628eb0986ef6b5df81
GCCAGAACCAAGAGATCCGTTGTTGAAAGTTTTAACTATTATATAGTACTCAGACGACAAATTAATTCAGAGTTTGGTGTTCTCCGGCGAGCACGTACCAACCAAGGTCGGTAGCCGAAGCGGCTCGCCAAAGCAACGAAGGTAGTATATTCAAGGGTGGGAGGTCTACCCGTGAGGGCATGAACTCTGTAATGATCCTTCCGCAGGTTCACCTACGGAAACCTTGTTACGACTTTTAC
>61a537925aa4b5dbecdb260fd9dc07b2
GAGAGCCAAGAGATCCGTTGTTAAAAGTTTTGTTTTTGTTATGATATTACATTCATTACTAACAGTTTGTGATGGCCGAAGCCACAGTTCACGGTGTGTATGGATGGCCAACTCCGAAGAGAAGGCACTCATTGAACTCAACTGACCGAAGCCAGAGAGCATTATTAATGATCCTTCCGCAGGTTCACCTACGGAAACCTTGTTATGACTTTT
>309d33a8d3613c92298ad91cfed3b96e
CAGGAACCAAGAGATCCATTGTTAAAGGTTGTTTAAAATTAGATTTTGGTTGTGATAATTTGTTAAAAGTTGGTTGGTTGTTTATAATAAAAAGACAGTAGCGTGACACCAGTAGTTAGAATAGCTTACGCCTTTCACACTACCAATACCAAACTAACATCTTCGCAAGTTATCAGGGTAATATTTAGGTTAATGACTTGACTATACAGTCAAGCACACCTCCCATAAACAATTACATTAATGATCCATCTGCAGGTTCACCTACAGATACCTTGTTACGACTTTTA
>cd56555d7b893877f59adbecd89af909
AAAAGTCGTAACAAGGTATCCGTAGGTGAACCTGCGGATGGATCATTAGTGAATGCGGCGCGCCGCGCGCATGCGAGGCGTCGCCAGCAACCCACCCTTGTGCAATGTACCGTACCCTGGCGGGGGCCTTTGGGCGTCCGCCGAAGGGAGGCTGCCTTTCGGGGCGGCTTTCCGAACCAACACGTTAACCACCGACTGACATCCAAGTAATTTAATGTTAAACAACTTTTGACAACGGATCTCTTGGCTCTC
>2b9e06875425f92a36c0c2afdab4dca5
TAAAAGTCGTAACAAGGTTTCCGTAGGTGAACCTGCGGAAGGATCATTACAGTAGTCGCCCGGGACGCCGCAAGGCCTCCCGGGTAACCTACCACCCTTTGTTTATTACACTTTGTTGCTTTGGCAGGCCTGCCCTCGGGCTGCTGGCTCCGGCCGGCGAGCGCCTGCCAGAGGACCTAAACTCTGTTTGTCTATACTGTCTGAGTACTATATAATAGTTAAAACTTTCAACAACGGATCTCTTGGTTCTGG
>2a536ab760f07ff8f9da9aff75953330
TAAAAGTCGTAACAAGGTTTCCGTAGGTGAACCTGCGGAAGGATCATTAGTGAATTATAGGGCGTCTACTTCGGTAGAGCCTGACCTCCACTCTCTAACACTGTGCACTCATTGGCGAGGGAATCAAGAAAAAGGCTCGCCTTGGACTTTTTACTCTTGCGGCTTACTTTTAAACACCAGTCAAAGTATGTAACGAAATATCGAAATAAAAAAAAACTTTCAACAACGGATCTCTTGGCTCTCG
>49b8dbf9b1081057586227f6bac2d7c4
AGAACCAAGAGATCCGTTGTTGAAAGTTTTAATTTATTAATTAAATTTACTCAGACTGCAAAGTTACGCAAGAGTTTGAATGTGTCCACCCGGGGCCCCCGCCAGAAGGCAGGGTCGCCCCGGAGGCAACGTGGTCGGACAACAAAGGGTTATGAGCATCCCGGTGGTTAGACCGGGGTCACTTGTAATGATCCCTCCGCAGGTTCACCTACGGAGACCTTGTTACGACCTG
>032f9b986d33250f1211d65b3f47c09b
GCGAGAGCCAAGAGATCCGTTGTTGAAAGTTGTATTTAGAATTATATATTCGAAATAGCTTCAGACAAAAAATTTACAATAAAGGTTGGTATTGTGCTATCAAGACGAATAAACGACTTGACAGCAAACATTGCACACAAGGTGAGTACTTGTTTAAAAAGTGCAGTAGAACACTTATTATGAATGATCCTTCCGCAGGTTCACCTACGGAAACCTTGTTACGACTTTTAC
>9ffb8a44db568e29ffb1a2f3a69d4996
CCAGAACCAAGAGATCCGTTGTTGAAAGTTTTAACTATTATATAGTACTCAGACAGTATAGACAAACAGAGTTTAGGTCCTCTGGCAGGCGCTCGCCGGCCGGAGCCAGCAGCCCGAGGGCAGGCCTGCCAAAGCAACAAAGTGTAATAAACAAAGGGTGGTAGGTTACCCGGGAGGCCTTGCGGCGTCCCGGGCGACTACTGTAATGATCCTTCCGCAGGTTCACCTACGGAAACCTTGTTACGACTTTTA
>ea9ea184b7deafbeaee6af62856c0e02
CGTGAACCAAGATATCCGTTGCTAAGAGTTGTTCTTTTGTTAAAATAAATATAACAATAGTTGTTAAGTTCAGAGCAAAGGGTTAATTGGGTTATAAAGAAATAAGTTGGTTGAAAGGCAGAGTCCTCGACAATGTTCAACAGCAGCACGACGCCAACACACAGAGTAACCATTTTATTAAAAAAAATCTCTGTGCATCAACAGGCCAACTGTTTCACGGCGACAACTCTTAAGGGGTTATACAAATTCACGATAGGTTTGAGGTTTGGATAGTGTCAATGATCCTTCCGCAGGTTCACCTACGGAAACCTTGTTACGACTTTTA
>c270623d74869e2d8f9bd6e0b2979284
GTAAAAGTCGTAACAAGGTTTCCGTAGGTGAACCTGCGGAAGGATCATTACAACAAGGTTCCCTGGCCCTCGAAGCTTCGGCGGAGGGGCGCTACAGCCTGACTTTATACCCACCCTTTGCCTATGTGTACCCCTATTGCTTCCCTCGGCGGGTTCGCCCGCCGACAGGAACCAACTAAACCCTTTGCATTATACATTCAACACTTCCGATACAAAACTAAATTATTACAACTTTTAACAATGGATCTCTTGGTTCTGGC
>553a77e444a29afcd3c3b2e4ff6e3c7a
GTAAAAGTCGTAACAAGGTTTCCGTAGGTGAACCTGCGGAAGGATCATTACCTAGAGTTGTAGGCTTTGCCTGCTATCTCTTACCCATGTCTTTTAAGTACCTTACGTTTCCTCGGCGGGTCCGCCCGCCGATTGGACAATTTAAACCATTTGCAGTTGCAATCAGCGTCTGAAAAAACTTAATAGTTACAACTTTCAACAACGGATCTCTTGGTTCTGGC
>d95afae7b07ff225a0407dfceab3ba66
GAGAGCCAAGAGATCCGTTGTCAAAAGTTGTTTAACATTAAATTACTTGGATGTCAGTCGGTGGTTAACGTGTTGGTTCGGAAAGCCGCCCCGAAAGGCAGCCTCCCTTCGGCGGACGCCCAAAGGCCCCCGCCAGGGTACGGTACATTGCACAAGGGTGGGTTGCTGGCGACGCCTCGCATGCGCGCGGCGCGCCGCATTCACTAATGATCCATCCGCAGGTTCACCTACGGATACCTTGTTACGACTTTT
>7d58e31b2132f8ce488e79f4d84810c5
TAAAAGTCGTAACAAGGTCTCCGTTGGTGAACCAGCGGAGGGATCATTACCGAGTTTACAACTCCCAAACCCCTGTGAACATACCTTAATGTTGCCTCGGCGGATCAGCCCGCGCCCCGTAAAACGGGACGGCCCGCCAGAGGACCCAAACTCTAATGTTTCTTATTGTAACTTCTGAGTAAAACAAACAAATAAATCAAAACTTTCAACAACGGATCTCTTGGTTCTGG
>4adbeef947070a7064b0c517a8c02821
GTAAAAGTCGTAACAAGGTTTCCGTAGGTGAACCTGCGGAAGGATCATTAGTGAATTTTAGCGCATCTGCTTCCAGAGCGTGACCTCCACTCTATACACTGTGCACTCATTGGCGGAGAGAAGACAAGTTTTTTTACGAAACGAGTCCGACACTCTGCGGCTCACTTTAAACACCAGTCAAAGTATGTATACGAAATATCGAAAAATAAAAAAACTTTCAACAACGGATCTCTTGGCTCTCGC
>55d5cd88c4261c58c1e0a57cec088d5a
GAGAGCCAAGAGATCCGTTGTTGAAAGTTGTATTTAGAATTATGTATTCGAAATAGCTTCAGACAAAAAATTTACAATAAAAGGTTGGTATTGTGCTGTCGAGACGAACAAACGACACGACAGCAAACATTGCACACAAGGTGAGTACTTGTTTAAAAAGTGCAGTAAAACACTTATTATGAATGATCCTTCCGCAGGTTCACCTACGGAAACCTTGTTACGACTTTT
>768f5597aa5db1a3247577dbfdad7bb5
CGGGAACCAAGAGATCCGTTGTTGAAAGTTTTAATTGTCATTCGACTTTTCATTCAGACTGCAATAAAGCTTCTTTCCACAAAGTAGTTTCGCTGGGGCTTACCGGCAGACTGACCCGTCCCTGACCCCCGTGCGGGGGAAGGGAGGAGCTGCCGAAGCAACTGGGGCGTTTCACAAGGGGTTTCACGCTGACCGCGGGGACGGCCGCCTTTTTTACGGGCGGACGGCGCGGCAGGTGCGGGGGACCGGCGCGAAGCCAACCCCCCCGTTTTTCTTTTTAATGATCCTTCCGCAGGTTCACCTACGGAAACCTTGTTACGACTTTTA
>4285c5c9af7a63aee782350c3abb935b
AAAGTCGTAACAAGGTCTCCGTTGGTGAACCAGCGGAGGGATCATTACTGAGTGTTAAAACTCCAAACCCATGTAAACATACCTATGTTGCTTCGGCGGCCTCGTCCCGCGGCGCGCGAGAGCGTGACCCGGTCCAAGGCGACCGCCGGAGGCACCAAACTCTTGTCTTTATAGTGAATTTCTGAGTGGCATAAGCAAATAAATCAAAACTTTCAGCAACGGATCTCTTGGTTCT
>2775508ceed465c3e9a8e6de29d83ecd
GTAAAAGTCGTAACAAGGTTTCCGTAGGTGAACCTGCGGAAGGATCATTGTCGTGACCCTGACCAAAATAGACCGTGCACGCGTTATCCAACCTGTCGGCGGCGGCACCGTCCGTTGCTCGGCCAAGTCCTCGACAACCTCCTCTTCTTTGAGTGGGGGCTCGGGGTAAAAGAACCCACGGCGCCTAAGGCGTCAAGGAACACTGTGCCTAACTCGGGGACGCGGCTGGCTTGCTGGCCGCCCCTCGTGTTGCAATGCTATTTAATCCACATGACTCTCGGCAACGGATATCTCGGCTCTCGC
>49a37e87facf58924ba0a269819fd883
AGAGCCAAGAGATCCGTTGTTGAAAGTTTTGATTCATTTGCTATTTCGCCTGGACTCGGAGAGCAATGCCGCTGCGACAGGAGAGTCTGGGGGGTCCTCCGGCGGGCGCCTTGGTCCGGGCCGCCGTGGGCGCCGGGGCGGTCCCGCCGAGGCAACGCGTGTGGTACGGTTCGCACGGGGTTTGGGAGTTGGGGCAACTCGGTAATGATCCCTCCGCTGGTTCACCAACGGAGACCTTGTTACGACCTG
>c5beb24173573ac5da77a64f23833d30
AAAAGTCGTAACAAGGTTTCCGTAGGTGAACCTGCGGAAGGATCACTAGTGATTAAATCGAGAGCGTCTTCATTGACCTCTCACCCTTCACATCCACATACACCTGTGCACCGTTTGGCTCTTATAAAAGACGAAAGTCTGAAATGAGAGTCATCAATTTTATACATACCCCAGTCTTATGAATGTAACAGTTTTAATAAACATAATAAAACTTTTAACAACGGATCTCTTGGTTCTC
>fc1b2ebf3f933a83b15322a8e0eb6511
GAGAACCAAGATATCCGTTGCTAAGAGTTGTTCGGAATTTCGTAATATCGCTAGGGTTTCAAGCCTAGTGAGATTAAAGTCGATCAAATTTGGAATGGGTTGTATAAAAAAGAGTTATAAGGTCACCTCCAAAAAGAGGGTGTGACCCGGGGTCATCGCTTCCGTTTTACCGGTCACGACGTTTAAGTTATGAAGTTCACAGGTGTTTATTAATACGTAGGATACGTGTTAATGATCCTTCCGCAGGTTCACCTACGGAAACCTTGTTACGACTTTT
>0b7518d1c2eb7b3e659d4ee2f4b05dae
AGAACCAAGAGATCCGTTGTTAAAAGTTTTAATTTATTAATTAAGTTTACTCAGACTGCAAAGTTACGCAAGAGTTTGAAGTGTCCACCCGGAGCCCCCGCCCGAAGGCAGGGTCGCCCCGGAGGCAACAGAGTCGGACAACAAAGGGTTATGAACATCCCGGTGGTTAGACCGGGGTCACTTGTAATGATCCCTCCGCAGGTTCACCTACGGAGACCTTGTTACGACTTT
>69febfe74398a6acde3d4390f508b394
GCCAGAACCAAGAGATCCGTTGTTGAAAGTTTTTCTTATTGTGTGCTCGCTCGGACTGCAACGTACGAGGGTTTGGAGGGCCTCTGGCAGGCGCTGGCCAGCCGGAGCCGGCGGCCCAGGGGCGGGCCTGCCAAAGCAACATGGTAGGTAGACACGGGGTTGGAGAGCTGCCCCGGACGGGGGCAGGCGCCTCGCTGATGATCCTTCCGCAGGTTCACCTACGGAAACCTTGTTACGACTTTTAC
>0bad5ecd3a518ba1e10d779bbe96af8c
AAAAGTCGTAACAAGGTATCCGTAGGTGAACCTGCGGATGGATCATTAGTGAATGCGGCGCGCCGCGCGCAAGCGAGGCGTCGCCAGCAACCCACCCTTGTGCAATGTACCGTACCCTGGCGGGGGCCTTTGGGCGTCCGCCGAAGGGGGGCCTGCCTTTCGGGGCGGCTTTCCGAACCAACACGTTAACCACCGACTGACATCCAAGTAATTTAATGTTAAACAACTTTTGACAACGGATCTCTTGGCTCTC
>34af3988ec11af0fe5bc60218c49b15e
CGAGAGCCAAGAGATCCGTTGTTGAAAGTTTTTTTTTATTTCGATATTTCGTTACATACTTTGACTAGTGTTATAAAATGAGCCGTAGAAGACATAGGATTCGAGGGTCATACGGATTCAACCGAAGTCCGTTATTACCTCTTGTCCAAGTCCTCCACCGATAAAATGCACAGAGTTAGAAAGTGGGGGTTCAGGCCAGACCGAAGTCTACGCCCTTAAATTCACTAATGATCCTTCCGCAGGTTCACCTACGGAAACCTTGTTACGACTTTTA
>42e6c29eecdfce16658c9e296cfca1a3
AAAAGTCGTAACAAGGTTTCCGTAGGTGAACCTGCGGAAGGATCATTACCGTGGGGCTTCGGCCCCATTGAGATAGCACCCTTTGTTTATGAGTACCCTTGTTTCCTCGGCGGGCTTGCCCGCCATGAGGACATTAAAAACCCTTTGTAGTTGCAGTAACTTCAGTTAATAATAAATATTAAAACTTTCAACAACGGATCTCTTGGTTCTG
>0eb470096bd918a2505c9eb61b862967
AGAACCAAGAGATCCGTTGTTGAAAGTTTTAAATTGATATTCTCCCGTGGGACGTCAGGGTTGAAGAGTTTAAAAAGAAATTTTTAACCTGTCCCGGCAGCGACGCCGGGGCAGTGTAATAGACAAGGGTTGGAGATGGGGCCCAGAGGACCCTGACTCGATAATGATCCTTCCGCAGGTTCACCTACGGAAACCTTGTTACGACTTT
>3eb6b992b779e9fcdeab6d382c28a4f1
CCAGAACCAAGAGATCCGTTGTTGAAAGTTTTGATTTATTTGTTTGTTTTACTCAGAAGTTACAATAAGAAACATTAGAGTTTGGGTCCTCTGGCGGGCCGTCCCGTTTTACGGGGCGCGGGCTGATCCGCCGAGGCAACATTAAGGTATGTTCACAGGGGTTTGGGAGTTGTAAACTCGGTAATGATCCCTCCGCTGGTTCACCAACGGAGACCTTGTTACGACTTTTA
>7ba559cc872719749da436eb265ff501
TAAAAGTCGTAACAAGGTCTCCGTAGGTGAACCTGCGGAGGGATCATTACCGAGTGAGGGCCCCCGGCCCGACCTCCAACCCTTTGTTGACCCCACCTGTTGCCTCGGGGGCGACCCGGCCTCCGCGCCGGGGCCCCCGGTGGACCGTCTCAACTCTGCATCTGTGCGTCGGAGTACTTTGCGAATCAATCAAAACTTTCAACAACGGATCTCTTGGTTCTGG
>c21757c2e0d2620f283694ce722a31f2
GAGAGCCAAGAGATCCGTTGTCAAAAGTTGTTTAACATTAAATTACTTGGATGTCAGTCGGTGGTTAACGTGTTGGTTCGGAAAGCCGCCCCGAAAGGCAGGCCCCCCTTCGGCGGACGCCCAAAGGCCCCCGCCAGGGTACGGTACATTGCACAAGGGTGGGTTGCTGGCGACGCCTCGCTTGCGCGCGGCGCGCCGCATTCACTAATGATCCATCCGCAGGTTCACCTACGGATACCTTGTTACGACTTTT
>f49d29f4644b7c58515d1597de63ac4c
CAAGAGCCAAGAGATCCATTGTTAAAAGTTGTCATTTTAATAAGTGTATCATACTCTGTCAAACATATACAAGCGTCTATGTGGATCGGCTTGCGCCTCTCCGCTACCAGCCATGGCTCGCACCAGGCCGATAACACCTTGCCCGGCATTTTACCGCACGGGTTCGGGTTTATATATGCATACCAGAACGATCCCCAAAGGGGACCAGCTCTGGTAGCAACATGATTTGTTAATGATCCTTCCGCAGGTTCACCTACGGAAACCTTGTTACGACTTTTA
>c1c1004aecb7e8be78c73fd8a649207b
AAGAGCCAAGAGATCCATTGTTAAAAGTTTTGGTTATTTACTTTTTCTTGGTAAAAGTCATGATTTAATGTTTATTTGCACACCGAAGCATGCTACCATCTCCCTTTCAGGAGTGGGCCTAGTGCCACGCAAAGTGGCGTGTTACACGACAAACTGCACAATATTACTCGTACAACTCACCCCACTAACACCCCAACTCTCACGCACACAATCTTAATTTTGTAATGATCCTTCCGCAGGTTCACCTACGGAAACCTTGTTACGACTTTT
>50ddda721c0af51918b383ddec0ffe41
AAAAGTCATAACAAGGTTTCCGTAGGTGAACCTGCGGAAGGATCATTAATAATGCTCTCTGGCTTCGGTCAGTTGAGTTCAATGAGTGCCTTCTCTTCGGAGTTGGCCATCCATACACACCGTGAACTGTGGCTTCGGCCATCACAAACTGTTAGTAATGAATGTAATATCATAACAAAAACAAAACTTTTAACAACGGATCTCTTGGCTCTC
>8afbee62de10eb72ffd33a1dfa79948f
AAAGTCGTAACAAGGTTTCCGTAGGTGAACCTGCGGAAGGATCATTAGTGAATTTTAGCGCACTTGTTTATTCAAGGCGTGACCTCCACTCTTATAACATTGTGCACTCATTGGCGGATGATGACTCAACTGATAGGCAACTTGAAGTGAAATTATTGTCTGCGGCTCACTTTTAAACATTTAGTTAAAGTATGTATACAAAATATCGAAAAAATAAAAAAACTTTCAACAACGGATCTCTTGGCTCT
>f2772701eabaa5b5d134de07eecd86f7
GTAAAAGTCGTAACAAGGTTTCCGTAGGTGAACCTGCGGAAGGATCATTCATAATAAGTGTTCTACTGCACTTTTTAAACAAGTACTCACCTTGTGTGCAATGTTTGCTGTCAAGTCGTTTATTCGTCTTGATAGCACAATACCAACCTTTATTGTAAATTTTTTGTCTGAAGCTATTTCGAATATATAATTCTAAATACAACTTTCAACAACGGATCTCTTGGCTCTCGC
>4e7781809ae0adafe72494a8f7c451d6
CAGAACCAAGAGATCCGTTGTTAAAAGTTTTAATTTATTAATTAAGTTTACTCAGACTGCAAAGTTACGCAAGAGTTTGAAGTGTCCACCCGGAGCCCCCGCCCGAAGGCAGGGTCGCCCCGGAGGCAACAGAGTCGGACAACAAAGGGTTATGAATAACCAGGCCGAAGCCCGGGCGTTCTTGTAATGATCCCTCCGCAGGTTCACCTACGGAGACCTTGTTACGACTTTT
>c5f15872b3ae726be014f9680547f928
CCAGAACCAAGAGATCCGTTGTTGAAAGTTTTAACTATTATATAGTACTCAGACATCACTAAAAACAAGAGTTGTGGTCCTCTGGCGGGCGCGCAGCAGCCGAAGCCGCTGGCCGCCGAAGCGACGGCCCACCAAAGCAACGAAGGTAGTTTATTCAAGGGTTACTAGTGAGCTTACACCGCGATGATCGGGTTTCCCCTACGCGGACGACTAGTTTCTTAATGATCCTTCCGCAGGTTCACCTACGGAAACCTTGTTACGACTTTTA
>7feaa89ff4512f33c727ba48420fedc5
GTAAAAGTCGTAACAAGGTTTCCGTAGGTGAACCTGCGGAAGGATCATCAGCGAGGCGCCTGCCCCCGTCCGGGGCAGCTCTCCAACCCCGTGTCTACCTACCATGTTGCTTTGGCAGGCCCGCCCCTGGGCCGCCGGCTCCGGCTGGCCAGCGCCTGCCAGAGGCCCTCCAAACCCTCGTACGTTGCAGTCCGAGCGAGCACACAATAAGAAAAACTTTCAACAACGGATCTCTTGGTTCTGGC
>c76e9a50c6c80c3ccd1609172b06b305
AAAGTCGTAACAAGGTCTCCGTAGGTGAACCTGCGGAGGGATCATTACAAGTGACCCCGGTCTAACCACCGGGATGTTCATAACCCTTTGTTGTCCGACTCTGTTGCCTCCGGGGCGACCCTGCCTTCGGGCGGGGGCTCCGGGTGGACACTTCAAACTCTTGCGTAACTTTGCAGTCTGAGTAAACTTAATTAATAAATTAAAACTTTTAACAACGGATCTCTTGGTTCT
>981ffb053340aa52c19d31062a4a9cd5
CAGAACCAAGAGATCCGTTGTTGAAAGTTTTAATATTTATTATTAACTGAAGTTACTGCAACTACAAAGGGTTTTTAATGTCCTCATGGCGGGCAAGCCCGCCGAGGAAACAAGGGTACTCATAAACAAAGGGTGCTATCTCAATGGGGCCGAAGCCCCACGGTAATGATCCTTCCGCAGGTTCACCTACGGAAACCTTGTTACGACTTTT
>6de0e5ca14f58ec1932ca4496272b1d4
AAAAGTCGTAACAAGGTTTCCGTAGGTGAACCTGCGGAAGGATCATTAGTGAATTTTAGCGCACTTGTTTATTCAAGGCGTGACCTCCACTCTTATAACATTGTGCACTCATTGGCGGATGATGACTCAACTGATAGGCAACTTGAAGTGAAATTATTGTCTGCGGCTCACTTTTAAACATTTAGTTAAAGTATGTATACAAAATATCGAAAAAATAAAAAAACTTTCAACAACGGATCTCTTGGCTCTC
>a914789ab89d258607672badf514824f
GAGAACCAAGAGATCCGTTGTTAAAAGTTTTATTATGTTTATTAAAACTGTTACATTCATAAGACTGGGGTATGTATAAAATTGATGACTCTCATTTCAGACTTTCGTCTTTTATAAGAGCCAAACGGTGCACAGGTGTATGTGGATGTGAAGGGTGAGAGGTCAATGAAGACGCTCTCGATTTAATCACTAGTGATCCTTCCGCAGGTTCACCTACGGAAACCTTGTTACGACTTTT
>42e0ee3d5fdb1c4396b4d665c238282a
CAGAACCAAGAGATCCGTTGTTGAAAGTTTTAACTATTATATAGTACTCAGACAGTATAGACAAACAGAGTTTAGGTCCTCTGGCAAGCGCTCGCCGGCCGGAGCCAGCAGCCCGAGGGCAGGCCTGCCAAAGCAACAAAGTGTAATAAACAAAGGGTGGTAGGTTACCCGGGAGGCCTTGCGGCGCCCCGGGTGACTACTGTAATGATCCTTCCGCAGGTTCACCTACGGAAACCTTGTTACGACTTTT
>8f3cbe3b943d14b945f97d750a5116cf
GCGAGAGCCGAGATATCCGTTGCCGAGAGTCATGTGGATTAAATAGCATTGCAACACGAGGGGCGGCCAGCAAGCCAGCCGCGTCCCCGAGTTAGGCACAGTGTTCCTTGACGCCTTAGGCGCCGTGGGTTCTTTTACCCCGAGCCCCCACTCAAAGAAGAGGAGGTTGTCGAGGACTTGGCCGAGCAACGGACGGTGCCGCCGCCGACAGGTTGGATAACGCGTGCACGGTCTATTTTGGTCAGGGTCACGACAATGATCCTTCCGCAGGTTCACCTACGGAAACCTTGTTACGACTTTTAC
>896531408586c4e0946bfc29d7a6d8fa
AAAGTCGTAACAAGGTTTCCGTAGGTGAACCTGCGGAAGGATCATTAGTGAATATTAGGGCGTCTACTTGTAGAGCCTGACCCTCCACTTCTAACACTGTGCATTATTCGGTCATCTGGCAAAGCGTCTTCGGACGTGGAGCTGTTTGGCTAATTTTACCATTAAACATTAGTACCAGTATGTAACGAAATATCGAAACAAAAAAAAACTTTCAACAACGGATCTCTTGGCTCT
>22cc444fae486cc5009f76581bb2763d
AAAAGTCGTAACAAGGTTTCCGTAGGTGAACCTGCGGAAGGATCATTACAAATCCATCACGTCTCCTTATCCGAGACCACGTTGAAATGTTCCCCAGTGGGCGGGCGTGGCTGTGTCGCAAGACGCACTGCACCGCCACCTGGGCTGTTAAACGAGTGTTTCCTTGTTGCTCAATTGTATCTTGTCTGCATCTCTCAGGATGAAGATTAAAAACTTGTACAACTTATAACAATGGATCTCTAGGCTCTT
>3872adad22138a1bc253b4e5fe65a31d
AGAGCCAAGAGATCCGTTGTTGAAAGTTTTTTTATTTTTTCGATATTTTGTATACATACTTTAACTAAATGTTTAAAAGTGAGCCGCAGACAATAATTTCACTTCAAGTTGCCTATCAGTTGAGTCATCATCCGCCAATGAGTGCACAATGTTATAAGAGTGGAGGTCACGCCTTGAATAAACAAGTGCGCTAAAATTCACTAATGATCCTTCCGCAGGTTCACCTACGGAAACCTTGTTACGACTTT
>5d82ee6f4ec21e73b974e14e905eeded
TAAAAGTCGTAACAAGGTTTCCGTAGGTGAACCTGCGGAAGGATCATTAAAAAGAAAAACGGGGGGGTTGGCTTCGCGCCGGTCCCCCGCACCTGCCGCGCCGTCCGCCCGTAAAAAAGGCGGCCGTCCCCGCGGTCAGCGTGAAACCCCTTGTGAAACGCCCCAGTTGCTTCGGCAGCTCCTCCCTTCCCCCGCACGGGGGTCAGGGACGGGTCAGTCTGCCGGTAAGCCCCAGCGAAACTACTTTGTGGAAAGAAGCTTTATTGCAGTCTGAATGAAAAGTCGAATGACAATTAAAACTTTCAACAACGGATCTCTTGGTTCCCG
>5a43f8449174ae0773c3ccf124d52af9
GCGCAAGCCAAGAGATCCGTTGTTGAAAGTTTTTTTTTGTTTCGATATTTCGTTACATACTTTAACTAGTGTTATAAAATGAGCCGCGAGATGTCAAGGCTTTCACCAATTCATCCGCCAATAAATGCACAGAGTTAGAAAGTGGAGGTCACGCTCTACAAGTAGATGCGCTAATATTCACTAATGATCCTTCCGCAGGTTCACCTACGGAAACCTTGTTACGACTTTTAC
>b3ce4f1f0764020ec33a0bbb08be7897
CCAGAACCAAGAGATCCGTTGTTGAAAGTTTTATTAATGGTTACGTTTTTAAGACGTCTGCTGTAGTCAAAGAATGGGGAGAAGAGCTCATTCATCCACCCGCGGCACGGGCACCGGTCGGGGGGAAAGTCCCCCCCGGGGGCCGCGTGTGCGTGACGATGTCGGGGTAGGGTAGTCAAGGATGGGAGATGGGGCCCGGAGGGACCCGCACACTCGTTAATGATCCTTCCGCAGGTTCACCTACGGAAACCTTGTTACGACTTTTA
>06e398234988c16b25cbb5e1170cedc0
AAAGTCGTAACAAGGTTTCCGTAGGTGAACCTGCGGAAGGATCATTACCGAGTGAGGGCCCTCTGGGTCCAACCTCCCACCCGTGTTTATTTTACCTTGTTGCTTCGGCGGGCCCGCCTTAACTGGCCGCCGGGGGGCTCACGCCCCCGGGCCCGCGCCCGCCGAAGACACCCTCGAACTCTGTCTGAAGATTGAAGTCTGAGTGAAAATATAAATTATTTAAAACTTTCAACAACGGATCTCTTGGTTCC
>f435628670b7eba9ef0a3bf26bbee1dc
GAGAGCCAAGAGATCCGTTGTCAAAAGTTGTTTCAAATTTATATATTTGATTAAGACTTGTTTTATAAAAAAAGGTGTTAACAAAAAAGACTGGCAAGTTGAGAATAAACTCGGGCTTGCCAGAGACAATAAACGATTCACACAAGGTTGACCTGGACAAACTGTTTTCACAGCCGCCCAAGCGTTTTTAGAAAGCTCTAAAGCTTACATTTAATAATGATCCAACCGCAGGTTCACCTACGGTTACCTTGTTACGACTTTT
>f1e5368c62e585e35a3f78531bee6c4f
GCGAGAGCCAAGAGATCCGTTGTTGAAAGTTTTTTTTTATTTCGATATTTCGTTACATACTTTGACTGGTGTTTAAAATGAGCCGTAAGCACTTCACTCGCCCGGCCGAAGCCGGGGTCGTTCGTTGCTCACCAATAAAATGCACAGAGTTAGAAAGTGGAGGTCAGGCTCGTCACCGAAGTGAACGACGCCCTATAATTCACTAATGATCCTTCCGCAGGTTCACCTACGGAAACCTTGTTACGACTTTTAC
>78c3e8b0aa44dce1ac772c2c6ba29296
AGAGCCAAGAGATCCGTTGTTGAAAGTTGTATTTTGAATTATTTTATTCATAATATTTTTCAGACAAAGAGTTAAAAAATTAGGTTGATGTTTGGCCGATCTCCATAAAGAAGATCGACTGACATTGCACACAAGGTGGATATGGATTTAAAAAGTGCCATAAAACACTTATTATGAATGATCCTTCCGCAGGTTCACCTACGGAAACCTTGTTACGACTTT
>cee65a231ed9b349a469c5d93575cc22
TAAAAGTCGTAACAAGGTTTCCGTAGGTGAACCTGCGGAAGGATCATTAACGAGTGTGCGGGTCCCTCCGGGCCCCATCTCCCATCCTTGACTACCCTACCCCGACATCGTCACGCACACGCGGCCCCCGGGGGGGACTTTCCCCCCGACCGGTGCCCGTGCCGCGGGTGGATGAATGAGCTCTTCTCCCCATTCTTTGACTACAGCAGACGTCTTAAAAACGTAACCATTAATAAAACTTTCAACAACGGATCTCTTGGTTCTGG
>5d5c8cee288232560802ae91f54b3a95
AGAGCCAAGAGATCCGTTGTTGAAAGTTTTTTTTTGTTTCGATATTTCGTTACATACTGGTACTAATGTTTAATGGTAAAATTAGCCAAACAGCTCCACGTCCGAAGACGCTTTGCCAGATGACCGAATAATGCACAGTGTTAGAAGTGGAGGGTCAGGCTCTACAAGTAGACGCCCTAATATTCACTAATGATCCTTCCGCAGGTTCACCTACGGAAACCTTGTTACGACTTT
>cc7cfccd5546bd4118cb50a5585ff0a4
CCAGAACCAAGAGATCCGTTGTTGAAAGTTTTAATATTTATTATTAACTGAAGTTACTGCTACTACAAAGGGTTTTTGATGTCCTCATGGCGGGCAAGCCCGCCGAGGAAACAAGGGTACTCATAAACAAAGGGTGCTATCTCAATGGGGCCGAAACCCCACGGTAATGATCCTTCCGCAGGTTCACCTACGGAAACCTTGTTACGACTTTTA
>814740efa5be900c6ebb592edb29b2c8
GCGAGAGCCAAGAGATCCGTTGCTAAAAGTTGTCTTTAATTTTTAATTAAAGTCTCAGAGCTAGGGTATATCATTGACGTGGACAAAACATGGCAGGTCTGCACATGCATGCTAGCCAGCCCGGGGATCTTTCAATCTCCAGGCAGCACACACGCAGGCACAGGGCCCACCATGACATTGATAACAGTTCACAGGACGTGGAGAGGTTGGAAAACATTTAGTAATGATCCTTCCGCAGGTTCACCTACGGAAACCTTGTTACGACTTTTAC
>9dbcf4db9673d576a1f4e8611e07fb0d
GGAACCAAGAGATCCGTTGTTGAAAGTTTTGCGGGTTTGATCGCTCCTCGGACGGCACCGAAACTGCGGGTACGGGTAGGGGCCCTCCGGCGAGCGTCCCCCGGGAGGGGGGCTTGCCGAAGCAACGTCGGGGGGACAGCACGGGTGAGGGTTAGGGGCGCAGGGCCCCCGGAGACGGGGATCGCTCCCCGCCTCGCTCCCGGTAATGATCCCGCTGCAGGTTCACCTACAGCGACCTTGTTACGACTTT
>05254fa40d63d40414929dceacb85942
AAAGTCGTAACAAGGTTTCCGTAGGTGAACCTGCGGAAGGATCATTATCGAGTCAGGGTCCTCTGGGCCCCATCTCCAACCCTTGTCTATTACACTGCCCCGGCGTCGCTGCCGGGACAGGTTAAAAATTTCTTTTTAAACTCTTCAACCCTGACGTCCCACGGGAGAATATCAATTTAAAACTTTCAACAACGGATCTCTTGGTTCT
>7574f1dfca7059622a3a50806000868b
CAGAACCAAGAGATCCGTTGTTGAAAGTTTTTAACTATTAGATAGTACTCAGACGTCACTGTAAACAGAGTTGGGGTCCTCTGGCAGGCGCACACCGGCCCGAGCCCAGTGGGTTTCCACGGCCTGCCAAAGCAACAAAGGTAGAGTAGTCAAGGGTGGGAGATCTACCCCGGGGGGCATGAGCTCTGTAATGATCCTTCCGCAGGTTCACCTACGGAAACCTTGTTACGACTTTT
>0e5a49fcf53b380c5aed59f0106e3340
AAAAGTCGTAACAAGGTTTCCGTAGGTGAACCTGCGGAAGGATCATTACAGAGCTCATGCCCCCCGGGGTAGATCTCCCACCCTTGACTACTCTACCTTTGTTGCTTTGGCAGGCCGTGGAAACCCACTGGGCTCGGGCCGGTGTGCGCCTGCCAGAGGACCCCAACTCTGTTTACAGTGACGTCTGAGTACTATCTAATAGTTAAAAACTTTCAACAACGGATCTCTTGGTTCTG
>132fafc3bf8904f840b7171ffa5242e4
GCCAGAACCAAGAGATCCGTTGTTGAAAGTTTTAACTATTATATAGTACTCAGACAATATTAACAAACAGAGTTTGGGTTTCCTCTGGCAGACGCGGACCAGCCGGAGCCGGTGGGCCGAAGCCGGGCCTGCCAAAGCAACAAAGGTATGTATAAACAAAGGGTGGGAGGTATACCCCGAAGGGCAACGTCTCTTTAATGATCCTTCCGCAGGTTCACCTACGGAAACCTTGTTACGACTTTTAC
>8e9669342c19e51d6e3d7943866b449b
ATGCGAGAGCCAAGAGATCCGTTGTCAAAAGTTGTTTAGCTTTCACTTTATAAAGACGCATATTAGATTTGGTAGTTTGGAGCACGCCGAGACGCGCTCCAGAAACAGCATTGATGCACAGGTTTATAGACTTTCGTCAATTGGTAATGATCCAACCGCAGGTTCACCTACGGTTACCTTGTTACGACTTTTACTTCCTCTAAATG
>0168fca2735c79abdd3dea0a34e79134
GCCAGAACCAAGAGATCCGTTGTTGAAAGTTTTAACTATTAAAATAGTACTCAGACAATATTAACAAAAGAGTTTGGGGTCCTCTGACAGGCACGGGCCAGCCGAAGCCAGCGGTCCGAAGACGGGCCTGCCAAGGCAACAAAGGTATAATATACAAAGGGTGGGAGATCTACCCCGAAGGGCACGTTCTCATTAATGATCCTTCCGCAGGTTCACCTACGGAAACCTTGTTACGACTTTTAC
>5df4e60cedd4bafe1741bb04a3db7a9a
TAAAAGTCGTAACAAGGTTTCCGTAGGTGAACCTGCGGAAGGATCATTAAAGAGACGTTGCCCTTCGGGGTATACCTCCCACCCTTTGTTTATTATACCTTTGTTGCTTTGGCGGGCCCGTCCTCGGACCACCGGCTTCGGCTGGTCAGTGCCCGCCAGAGGACCTAAAACTCTGTTTGTTCATATTGTCTGAGTACTATATAATAGTTAAAACTTTCAACAACGGATCTCTTGGTTCTGG
>9bd15f0a05ece2e1a022f9d1266b2300
GTAAAAGTCGTAACAAGGTTTCCGTAGGTGAACCTGCGGAAGGATCATTAATGAGAACGTGCCCTTCGGGGTAGATCTCCCACCCTTTGTATATTATACCTTTGTTGCCTTGGCAGGCCCGTCTTCGGACCGCTGGCTTCGGCTGGCCCGTGCCTGTCAGAGGACCCCAAACTCTTTTGTTAATATTGTCTGAGTACTATTTTAATAGTTAAAACTTTCAACAACGGATCTCTTGGTTCTGGC
>3bb24a9783f0b146da4368b317bf2aea
CCAGAACCAAGAGATCCGTTGTTGAAAGTTTTGATTGATTCGCAAAGTACTCCGACGCACAGATGCAGAGTTGAGACGGTCCACCGGGGGCCCCGGCGCGGAGGCCGGGTCGCCCCCGAGGCAACAGGTGGGGTCAACAAAGGGTTGGAGGTCGGGCCGGGGGCCCTCACTCGGTAATGATCCCTCCGCAGGTTCACCTACGGAGACCTTGTTACGACTTTTA
>39fc16813a3d7d97e6b8193225d30ba5
TAAAAGTCGTAACAAGGTAACCGTAGGTGAACCTGCGGTTGGATCATTACTGATACTTGGTCTCTGAGTTGATACCGAAAGGAGTCCTCATTGCCAAATTCACCTCTTGTGCACTATATTGTCTTTTGGTAGTTTAAACCTTGGTTTAGGCTGCCAAACTTTTTAACAAACCATATCAACTTGTCTGAAATTATATAAAAATATAAACAACTTTTGACAACGGATCTCTTGGCTCTCG
>d0a09badb63e911699e1422fbb7a9286
CGAGAGCCAAGAGATCCGTTGTTGAAAGTTTTTTTTTGTTTCGATATTTCGTTACATACTTTGACTGGTGTTTAAAATGAGCCGTAAGCACTTCACTCGCCCGGCCGAAGCCGGGGTCGTTCGTTGCTCACCAATAAAATGCACAGAGTTAGAAAGTGGAGGTCAGGCTCGTCACCGAAGTGAACGACGCCCTATAATTCACTAATGATCCTTCCGCAGGTTCACCTACGGAAACCTTGTTACGACTTTTA
>3d4994d8bbf2b86fa2b269b389a67d99
ACGAGCCAAGAGATCCACCGTTTAAAGTTGTCATTAAGTTGTTATGTTTAACTGGAGACATCTTGCGATGCTGCCAGACCAAACGACTAACGTTCATTCGGTCAGAACTGACTTGGTTCACAATGGGTTAAAATATAAATCATGGAAGCAAGCAAGCTTACTTTGGTCCACAATTCAATATATATAAAGGGTTGGTTCACACAAATGGGTCGATATAGAATCGTTTGTGAATGATCCTTCCGCAGGTTCACCTACGGAAACCTTGTTACGACTTTT
>a3e4f890df21b88816b0e2c3cb6e0104
AAAAGTCGTAACAAGGTTTCCGTAGGTGAACCTGCGGAAGGATCATTCATAATAAGTGTTTTACTGCACTTTTTAAACAAGTACTCACCTTGTGTGCAATGTTTGCTGTCGTGTCGTTTGTTCGTCTCGACAGCACAATACCAACCTTTTATTGTAAATTTTTTGTCTGAAGCTATTTCGAATACATAATTCTAAATACAACTTTCAACAACGGATCTCTTGGCTCTC
>190594257a61a538f384011f3717ee1d
TAAAAGTCGTAACAAGGTTTCCGTAGGTGAACCTGCGGAAGGATCATTGTCGTGACCCTGACCAAAATAGACCGCGCACGCGTAATCCAACCTGCCGGCGGCGGCATCGTCCGTTGCTCGGCCAAGTCCTTGACAACCTCCTCTTCTCGGAGTGGGGGCTCGAGGTAAAAGAACCCACGGCGCCTAAGGCGTCAAGGAACACTGTGCCTAACTCGGGGACGCGGCCGGCTTGCTTGCCGCCCCTCGTGTTGCAATGCTATTTAATCCACACGACTCTCGGCAACGGATATCTCGGCTCTCG
>6b8c53edfd8b7ab176b167a0620e4032
AGAACCAAGAGATCCGTTGTTGAAAGTTTTGATTCATTTTCGAAACGCCTACGAGAGGCGCCGAGAAGGCTCAGATTATAAAAAACCCGCGAGGGGGTATACAAAAAGAGTTTTGGTTGGTCCTCCGGCGGGCGCCTTGGTCCGGGGCTGCGACGCACCCGGGGCAGAGATCCCGCCGAGGCAACAGTTTGGTAACGTTCACATTGGGTTTGGGAGTTGTAAACTCGGTAATGATCCCTCCGCTGGTTCACCAACGGAGACCTTGTTACGACTTT
>17b76f61c0e856eb4a7ef6d131dc0895
TAAAAGTCGTAACAAGGTTTCCGTAGGTGAACCTGCGGAAGGATCATTAGTGAATATTAGCGCATCTACTTCTAGAGCGTGACCTCCACTTTCTAACTCTGTGCATTTATTGGCGGATGAATTGGTGAAAGCCTTGACATCTCGCGGCTCATTTTATAACACTAGTTAAAGTATGTAACGAAATATCGAAACAAAAAAAAACTTTCAACAACGGATCTCTTGGCTTGCG
>ca5d1d7ae8b7f8a3ffd4b05c845a99d9
CGAGAGCCAAGAGATCCGTTGTTGAAAGTTTTTTTATTTTTTCGATATTTTGTATACATACTTTAACTAAATGTTTAAAAGTGAGCCGCAGACAATAATTTCACTTCAAGTTGCCTATCAGTTGAGTCATCATCCGCCAATGAGTGCACAATGTTATAAGAGTGGAGGTCACGCCTTGAATAAACAAGTGCGCTAAAATTCACTAATGATCCTTCCGCAGGTTCACCTACGGAAACCTTGTTACGACTTTTA
>a621e72965b42f30e40b7d830986ae02
GTAAAAGTCGTAACAAGGTTTCCGTAGGTGAACCTGCGGAAGGATCATTAGTGAATTATAGGGCGTCTACTTCGGTAGAGCCTGACCTCCACTCTCTAACACTGTGCACTCATTGGCGAGGGAATCAAGAAAAAGGCTCGCCTTGGACTTTTTACTCTTGCGGCTTACTTTTAAACACCAGTCAAAGTATGTAACGAAATATCGAAATAAAAAAAAACTTTCAACAACGGATCTCTTGGCTCTCGC
>57441e47a09109df05a254a8afe2eb75
AAAAGTCGTAACAAGGTCTCCGTAGGTGAACCTGCGGAGGGATCATTACAAGAACGCCCGGGCTTCGGCCTGGTTATTCATAACCCTTTGTTGTCCGACTCTGTTGCCTCCGGGGCGACCCTGCCTTCGGGCGGGGGCTCCGGGTGGACACTTCAAACTCTTGCGTAACTTTGCAGTCTGAGTAAACTTAATTAATAAATTAAAACTTTTAACAACGGATCTCTTGGTTCTG
>6fe5bb2a953e3538ffaa16a1a38eab4b
AGAACCAAGAGATCCGTTGCTGAAAGTTTTGATTTATTTGCTTATGCCACTCAGAAATTCACTATAAAGACAAGAGTTTGGTGCCTCCGGCGGTCGCCTTGGACCGGGTCACGCTCTCGCGCGCCGCGGGACGAGGCCGCCGAAGCAACATAGGTATGTTTACATGGGTTTGGAGTTTTAACACTCAGTAATGATCCCTCCGCTGGTTCACCAACGGAGACCTTGTTACGACTTT
>6c3e69c764b7a802cd75e8e6c6371579
TAAAAGTCGTAACAAGGTTTCCGTAGGTGAACCTGCGGAAGGATCATTAGTGAATTTTAGCGCACTTGTTTATTCAAGGCGTGACCTCCACTCTTATAACATTGTGCACTCATTGGCGGATGATGACTCAACTGATAGGCAACTTGAAGTGAAATTATTGTCTGCGGCTCACTTTTAAACATTTAGTTAAAGTATGTATACAAAATATCGAAAAAATAAAAAAACTTTCAACAACGGATCTCTTGGCTCTCG
>9e45881288e2433b43c3f72b44126a7b
AAAGTCGTAACAAGGTCGCTGTAGGTGAACCTGCAGCGGGATCATTACCGGGAGCGAGGCGGGGAGCGATCCCCGTCTCCGGGGGCCCTGCGCCCCTAACCCTCACCCGTGCTGTCCCCCCGACGTTGCTTCGGCAAGCCCCCCTCCCGGGGGACGCTCGCCGGAGGGCCCCTACCCGTACCCGCAGTTTCGGTGCCGTCCGAGGAGCGATCAAACCCGCAAAACTTTCAACAACGGATCTCTTGGTTCC
>3faec46319e93939a463ac3814f9d82a
AGAACCAAGATATCCATTGTCAACAGTTGTTCAGTTTTTTTAAGTTGAGTCGTTAGAAACAACTGAGATAAGATTTACACTGTAGGGTTAAAAGGGGGCTTCCGCCCAGTCACACAAATGTCTGACGACATAAGTGTGACGTGCACCGCTCGCTGAGCACAGAGGTCTCGAATCAAATCTGGTCGACAATGATTTACCGAGATTGCTGTGGTCGCATACAGGGATGAATGTTCACGGGGGGTTTAACGTTGGATACGTGTTAATGATCCTTCCGCAGGTTCACCTACGGAAACCTTGTTACGACTTT
>90aea00273ad61185429889b7352c6ae
AAAGTCGTAACAAGGTTTCCGTAGGTGAACCTGCGGAAGGATCATTACAAATTAGTTGTGGATTTTGGGTGGTGTAAAGTGTGATTTGTGACGTGAAGTGTGAAGTGTGGTATTTCGATATTACATTACACACATGCATACATTAATTACATTACTTGCACTACTCATTGTCCATTATAGCCCACTCCTGAAAGGGAGATGGACGCGCTAGTGCTAGTTCGCTGGCGCAAATAGACCTTAAATCATGACTTATTCCAAAAAGAAAATAACCAAAACTTTTAACAATGGATCTCTTGGCTCT
>3d3d3de100f54160f06aa18e0d5dba57
TACAAGTCGTAACAAGGTATCCGTAGGTGAACCTGCGGATGGATCATTACTAAAGGACCTATCCAACGTCCTGTGAACTGTTTTGAAATTTTTGTCAGCGACCATCACTGGCTGCTGGCATACCACTTAAACGTATAACCTAAACTGAAATCTACTAGTAAGAACTAAGAGAACTTTTAGCAACGGATCTCTTGGCTCTCGCAT
>de791506f8495a56b6b05e8e604b136a
AGTAAAAGTCGTAACAAGGTAACCGTAGGTGAACCTGCGGTTGGATCATTACAAATCCTGACTCGCAAGAGTCTAAACCACCTGTGCATCATTTTTGGTAAGCTGTCTTCGGATGGTGAACCTATCTACTACTATATGTCTGATTTTATTTTAAATAATAAACAACTTTTGACAACGGATCTCTTGGCTCTCGCATCGATGAAGA
>b11ee146ea150e5c56a054eca2911e0a
GTAAAAGTCGTAACAAGGTTTCCGTAGGTGAACCTGCGGAAGGATCATTAGTGAATTTTAGCGCACTTGTTTATTCAAGGCGTGACCTCCACTCTTATAACATTGTGCACTCATTGGCGGATGATGACTCAACTGATAGGCAACTTGAAGTGAAATTATTGTCTGCGGCTCACTTTTAAACATTTAGTTAAAGTATGTATACGAAATATCGAAAAAATAAAAAAACTTTCAACAACGGATCTCTTGGCTCTCGC
>ba47cd6aa6b2155ce021a4a1b0de54ee
AAAAGTCGTAACAAGGTAACCGTAGGTGAACCTGCGGTTGGATCATTATTAAATGTAAGCTTTAGAGCTTTCTAAAAACGCTTGGGCGGCTGTGAAAACAGTTTGTCCAGGTCAACCTTGTGTGAATCGTTTATTGTCTCTGGCAAGCCCGAGTTTATTCTCAACTTGCCAGTCTTTTTTGTTAACACCTTTTTTTATAAAACAAGTCTTAATCAAATATATAAATTTGAAACAACTTTTGACAACGGATCTCTTGGCTCTC
>89d9702639e1b73c13f5bec929b46cce
TGCGAGAGCCAAGAGATCCGTTGTCAAAAGTTGTTTATTATTTAAAATAAAATCAGACATATAGTAGTAGATAGGTTCACCATCCGAAGACAGCTTACCAAAAATGATGCACAGGTGGTTTAGACTCTTGCGAGTCAGGATTTGTAATGATCCAACCGCAGGTTCACCTACGGTTACCTTGTTACGACTTTTACTTCCTCTAAAT
>60ad46e42079feb93b802db7e2eacd07
TAAAAGTCGTAACAAGGTATCCGTAGGTGAACCTGCGGATGGATCATTAGTGAATGTGCGGCGACGGCGCAAGCCCGAGCCAGCCAATCCACCCTTGTGCAATGTACCGTACCCTGGCGGGGCCGACCTGGTCGACCGCGCCAAAGGGCTTTCGAGCCCGACCAACGCTCTAATCTCTGTCTGAACTTTACGAACCAAATGATCTAAACAACTTTTGACAACGGATCTCTTGGCTCTCG
>e09c604db83a197ce2df056229a2a232
GTAAAAGTCGTAACAAGGTAACCGTAGGTGAACCTGCGGTTGGATCATTACTGATACTTGGTCTATGAGTTGATACCGAAAGGAGTCCTCATAGCCAAATTCACCTCTTGTGCACTATATTGTCTTTTGGTAGTTTATACCTTGGTATAGGCTGCCAAACTTTATAACAAACCATATAAACTTGTCTGAAATTATAATAAAATATAAACAACTTTTGACAACGGATCTCTTGGCTCTCGC
>3f6da054cf91b222aa957bc40f543b9e
GTAAAAGTCGTAACAAGGTTTCCGTAGGTGAACCTGCGGAAGGATCACTAAAGAATTCGCCCTTCGGGGCTCTCTTTATTCACACACCCCTGTGCACTTTGGCCACCTCTTTGTTGAGGTGTGTCTTTTTAATTACCATACCCTATAAACACAAGTTATTGAATGTAAAATCGTTATAAACTAATATAACTTTCAACAACGGATCTCTTGGTTCTCGC
>f283df9a9de29e37df8d5596d06fa909
AGAGCCAAGAGATCCGTTGTTGAAAGTTGTATTTATTTGAATTAAGTAAATTCGAAAATATGTTATCAGACAGATTCGTTATGAGAATAAGAGTTTAGTTAAAAGCCATCCGTCGCTGTAGCGTAAACTACTTGATGGACGACCCAACATTGCACACAAGGTGGGTATGGATTTTAAAAAGTGCCATAAAACACTTATTGTGAATGATCCTTCCGCAGGTTCACCTACGGAAACCTTGTTACGACCTG
>d38e2b16659c9d897b2e6c2cec266396
CAGAACCAAGAGATCCGTTGTTGAAAGTTTTAATTTATTGTTTGTTTCACTCGGACGTCACTGAAAACAGCGTGGAAAAGGGCCTCTGACGAGAGCGCACCGACCGAAGCCGGGGCCGAGGCGCAAGGCACCCCGGCGCTCGCCAAAGCAACAAAGGTTGGTAGACACAGGGTTGAAGAGGTAAGGGGGGCCGAAACCCCCCCGGGGGCGCGAAACCCCTCTCTCGGTAATGATCCTTCCGCAGGTTCACCTACGGAAACCTTGTTACGACTTTT
>b923604b5726d381ccf144240fe24769
TAAAAGTCGTAACAAGGTTTCCGTAGGTGAACCTGCGGAAGGATCATTACCGTGGGGTTTCGGCCCCATTGAGATAGCACCCTTTGTTTATGAGTACCCTTGTTTCCTCGGCGGGCTTGCCCGCCATGAGGACATCAAAAACCCTTTGTAGTAGCAGTAACTTCAGTTAATAATAAATATTAAAACTTTCAACAACGGATCTCTTGGTTCTGG
>77f06858ebccf29676fd6f9d8f028db0
ACGAGTCGTAACAAGGTTTCCGTAGGTGAACCTGCGGAAGGATCATTAACAGATGCTGCTAGTCAGATATCTTACCCCGTGTGAACTGTTCTTTTGACTTGGTGTCCAAGCACTGAATCTTCCAAGACTTTCTTGGCGGATTTACGTCTGGGCACCATCCGTTTTTACCCTTTGACTTTGAATGCCGAGTAAATTACAAAAGACTAGAAAACTTTTAGCAACGGATCTCTAGGCTCTT
>f38ea245bd33c95d058c5d9b565ff3d5
ACGAGCCTAGAGATCCATCGTTAAAAGTCGTCGATTTTAGTTAGTTCTTTAGCAGTAAAGCTAGGAACTAGGTTTCAGAATGAATTGGTTTAAGGTTTATGTGGTGTATTTTCTATCCGAAGATAGAAAAAAAAACATATGGTTGGTTTAGATTCACAGTCGGTAAGATTTTAGATGCACGTTAATGATCCTTCCGCAGGTTCACCTACGGAAACCTTGTTACGACTTGT
>b2dd709fbb5b42a8ff696491def20bb3
GTAAAAGTCGTAACAAGGTAACCGTAGGTGAACCTGCGGTTGGATCATTAAAAAATCTAACTGATTTAATCAGCAATTTTATTGCTTGATTATTTCTTACACCTTTGTGAACTGTTTATTGTCTCTGGTGAGTTAAAAATGGAATAGCTGTGCTCGCACGGTTGTTTCGCTCACCGGTTTATATCTTTAACACTTTGTATTATTTGACATAAAATTTAAATATAATAATTTAAAACAACTTTTGACAACGGATCTCTTGGCTCTCGC
>da0ee61c93074d5101f54be5ea086874
CGCAAGCCAAGAGATCCGTTGTTGAAAGTTTTTTTTTGTTTCGATATTTCGTTACATACTTTAACTAGTGTTATAAAATGAGCCGCGAGATGTCAAGGCTTTCACCAATTCATCCGCCAATAAATGCACAGAGTTAGAAAGTGGAGGTCACGCTCTAGAAGTAGATGCGCTAATATTCACTAATGATCCTTCCGCAGGTTCACCTACGGAAACCTTGTTACGACTTTTA
>c47f0b58177827b72a7cc6e386c36816
GTAAAAGTCGTAACAAGGTTTCCGTAGGTGAACCTGCGGAAGGATCATTACCTAGAGTTTGTGGGCTTTGCCCACTGTCTCTTACCCATGTCTTTTGAGTACTTACGTTTCCTCGGTGGGCTCGCCCGCCGGTTGGACAATTTAAACCATTTGCAGTTGCAATCAGCGTCTGAAAAACATAATAGTTACAACTTTCAACAACGGATCTCTTGGTTCTGGC
>b22c04638062ac279089e631d8e3fa9a
AGAGCCAAGAGATCCATTGTTAAAAGTTTTGGTTATTTTCTTTTTGGAATAAGTCATGATTTAAGGTCTATTTGCGCCAGCGAACTAGCACTAGCGCGTCCATCTCCCTTTCAGGAGTGGGCTATAATGGACAATGAGTAGTGCAAGTAATGTAATTAATGTATGCATGTGTGTAATGTAATATCGAAATACCACACTTCACACTTCACGTCACAAATCACACTTTACACCACCCAAAATCCACAACTAATTTGTAATGATCCTTCCGCAGGTTCACCTACGGAAACCTTGTTACGACTTT
>db360bd036b3db52bba3eaf9a4564446
TAAAAGTCGTAACAAGGTTTCCGTAGGTGAACCTGCGGAAGGATCATTAACACGTATCCAACGTTATACCCCCTGTGAACTTTCACATTACTCCGCACCTTAGCTTCTCTTTTGAGAAGGCCCCACGGTTTCGCTCGGAACATCACGTCCAGGCGACTAGGGTGCTCGGGCCACCATGCCCCTTTATTATTTAACCCCACAGTTTCGTAGCTAGGTCGCGTTAATCCGTTGACCTTAAAAAAAAACCGAACAACTGTTAACAATGGATATCTTGGTTCTCG
>8421b601fc231023ce5b7855ff716c74
AAAGTCGTAACAAGGTTTCCGTAGGTGAACCTGCGGAAGGATCATTCATAATAAGTGTTTTATGGCACTTTTTAAATCCATATCCACCTTGTGTGCAATGTCAGTCGATCTTCTTTATGGAGATCGGCCAAACATCAACCTAATTTTTTAACTCTTTGTCTGAAAAATATTATGAATAAAATAATTCAAAATACAACTTTCAACAACGGATCTCTTGGCTCT
>fd91af07bffce5c500aa2dcff98c6cc2
GCGAGAGCCAAGAGATCCGTTGTTGAAAGTTTTTTTTTATTTCGATATTTCGTTACATACTTTGACTGGTGTTTAAAAGTAAGCCGCAAGAGTAAAAAGTCCAAGGCGAGCCTTTTTCTTGATTCCCTCGCCAATGAGTGCACAGTGTTAGAGAGTGGAGGTCAGGCTCTACCGAAGTAGACGCCCTATAATTCACTAATGATCCTTCCGCAGGTTCACCTACGGAAACCTTGTTACGACTTTTAC
>3b89077fe11b9f03332a087d0e463c76
GCCAGAACCAAGAGATCCGTTGTTGAAAGTTGTAACTATTATGTTTTTCAGACGCTGATTGCAACTGCAAATGGTTTAAATTGTCCAACCGGCGGGCGAGCCCACCGAGGAAACGTAAGTACTCAAAAGACATGGGTAAGAGACAGTGGGCAAAGCCCACAAACTCTAGGTAATGATCCTTCCGCAGGTTCACCTACGGAAACCTTGTTACGACTTTTAC
>5d4f499e79beff0e900bf343113c29bf
CGAGAGCCAAGAGATCCGTTGTTGAAAGTTTTTTTTTATTTCGATATTTCGTTACATACTTTGACTGGTGTTTAAAAGTAAGCCGCAAGAGTAAAAAGTCCAAGGCGAGCCTTTTTCTTGATTCCCTCGCCAATGAGTGCACAGTGTTAGAGAGTGGAGGTCAGGCTCTACCGAAGTAGACGCCCTATAATTCACTAATGATCCTTCCGCAGGTTCACCTACGGAAACCTTGTTACGACTTTTA
>58e34e98a6f21d4ef0729ed444063aad
AAAAGTCGTAACAAGGTTTCCGTAGGTGAACCTGCGGAAGGATCATTACCGAGAGAGGGGTTTCGCGCCCCCGGGGGGGTTTCGGCCCCCCTTACCTCTTCAACCCTGTGTCTACCAACCTTTGTTGCTTTGGCGAGCGCCGGGGTGCCTTGCGCCTCGGCCCCGGCTTCGGTCGGTGCGCTCTCGTCAGAGGCCCTTTTCCACGCTGTTTTCAGTGACGTCCGAGTGAAACAAACAATAAATTAAAACTTTCAACAACGGATCTCTTGGTTCTG
>f2ee375aaaddaa66b6d8aeb176e5a897
AAAGTCGTAACAAGGTTTCCGTAGGTGAACCTGCGGAAGGATCATTAATACGTATCCACGTTTCAACCCCCTGTGCACATGTCGTACGAGCCGGCCCCGGTAAAGTCCTTTGCGGGACTGGGGATTAAAAATGGTCGTATCTGGTATTCATTTACCTTATTTTTAACACCTTTTTCACACACCTGTACTAATCTTGACTGCTTTCGAGCGTCAAAAATACGAAACTAAAACAACTCTTAGCAACGGATATCGTGGTTCC
>4e58907498ba30ca7e94260eb83ee2cc
GCGAGAACCAAGAGATCCGTTGTTGAAAGTTATATTAGTTTATAACGATTTTACATTCAATAACTTGTGTTTATAGGGTATGGTAATTAAAAAGACACACCTCAACAAAGAGGTGGCCAAAGTGCACAGGGGTGTGTGAATAAAGAGAGCCCCGAAGGGCGAATTCTTTAGTGATCCTTCCGCAGGTTCACCTACGGAAACCTTGTTACGACTTTTAC
>3d8dcc9252efada30a9d8e589a468109
CGAGAACCAAGAGATCCGTTGTTGAAAGTTTTAACGATTTACTTTTCGTATACTGACAGAAGTTTACAGAAATGGTTTCATGGTGGGCCTCAGGCGGGCTGACAGCACGAGGCATGCCGCCGAAGCAACGGGAAGGTTCACAATGGTTTGAAGTAACGAGTACCACACCGCATCCCCATAAAGGGGCTCCGCGGGTGGCATTACGTACGGATTAGAGCCCCGGAGGCTGGTCCACCCAGATACTGGATCCAGGGTGAAGGATTTTTAATGATCCTTCCGCAGGTTCACCTACGGAAACCTTGTTACGACTTTTA
>ed3df331745b42e0690d022b4200d8fe
GCGAGAGCCAAGAGATCCGTTGTCAAAAGTTGTTTTAAATTATTATATTTAAATTTTATGTCAAATAATACAAAGTGTTAAAGATATAAACCGGTGAGCGAAACAACCGTGCGAGCACAGCTATTCCATTTTTAACTCACCAGAGACAATAAACAGTTCACAAAGGTGTAAGAAATAATCAAGCAATAAAATTGCTGATTAAATCAGTTAGATTTTTTAATGATCCAACCGCAGGTTCACCTACGGTTACCTTGTTACGACTTTTAC
>5044ec7ff727868ac06a8aa5b778f72d
CAGAACCAAGAGATCCGTTGTTGAAAGTTTTCACGATTGTTCTTGTGGACTCGGACGACACTGATAAACAGGGTTGGATAAGGGCGATGGACGGGCACAACCCCCGCCGGCGGTGGCCATCCGCGCGAACGCGAGGCCACCGTCCAAGCCGTGGGGGGGGGCAGAGGCCCCCGGCCCGCCAAAGCAACAAAGGTAGGTAGACACGGGGGGGAGAAACGGGACGGAGCCCGCGGGGCCGAGCCCCGAGGAGAACTGGCTCCTCTCTGGTAATGATCCTTCCGCAGGTTCACCTACGGAAACCTTGTTACGACTTGT
>8e3e7ac19ce65b766d41d4a2778a1128
CGAGAGCCGAGATATCCGTTGCCGAGAGTCGTGTGGATTAAATAGCATTGCAACACGAGGGGCGGCAAGCAAGCCGGCCGCGTCCCCGAGTTAGGCACAGTGTTCCTTGACGCCTTAGGCGCCGTGGGTTCTTTTACCTCGAGCCCCCACTCCGAGAAGAGGAGGTTGTCAAGGACTTGGCCGAGCAACGGACGATGCCGCCGCCGGCAGGTTGGATTACGCGTGCGCGGTCTATTTTGGTCAGGGTCACGACAATGATCCTTCCGCAGGTTCACCTACGGAAACCTTGTTACGACTTTTA
>e2c9042c015db64bb4015c3d476de9e4
GAGAGCCAAGAGATCCGTTGTTGAAAGTTTTTTTATTTTTTCGATATTTTGTATACATACTTTAACTAAATGTTTAAAAGTGAGCCGCAGACAATAATTTCACTTCAAGTTGCCTATCAGTTGAGTCATCATCCGCCAATGAGTGCACAATGTTATAAGAGTGGAGGTCACGCCTTGAATAAACAAGTGCGCTAAAATTCACTAATGATCCTTCCGCAGGTTCACCTACGGAAACCTTGTTACGACTTTT
>cab1f30057afc5b191b061372b9de655
[truncated: 32,473 more rows]
