# Supplementary material for: A comprehensive assessment of fungal communities in various habitats from an ice-free area of maritime Antarctica: diversity, distribution, and ecological trait
Source: Environ Microbiome. 2022 Nov 15;17:54. doi: 10.1186/s40793-022-00450-0 (PMC9667611; doi:10.1186/s40793-022-00450-0)
Supplement: Supplementary file 3 — Additional file 3. Table S3. Information on the 17,236 fungal ASVs in the 213 samples collected from the Fildes Region (maritime Antarctica). [file 40793_2022_450_MOESM3_ESM.xlsx]

## Sheet: 1. 原始矩阵_feature-table 213
Table S3. Information on the 17236 fungal ASVs in the 213 samples collected from the Fildes Region (maritime Antarctica).
#ASV ID	Kingdom	Phylum	Class	Order	Family	Genus	Species	A1_0	A1_10	A1_30	A2_0	A3_0	A3_10	A3_5	A4_0	A4_10	A4_30	A4_5	A5_0	A5_10	A5_5	AN01	AN02	AN03	AN04	AN05	AN06	AN07	AN08	AN09	AN10	AN11	AN12	AN13	AN14	G1_0	G1_10	G1_20	G1_5	G2_0	G3_0	G3_5	G4_0	G4_10	G4_5	G5_0	G5_10	G5_20	G5_30
000151338b16ac616f8ed91a68242252	k__Fungi	p__unidentified	c__unidentified	o__unidentified	f__unidentified	g__unidentified	s__unidentified	0	0	0	0	0	0	0	0	0	0	0	0	0	0	0	0	0	0	0	0	0	0	0	0	0	0	0	0	0	0	0	0	0	0	0	0	0	0	0	0	0	0
00045d054f957ddec8e6cd783e14ede6	k__Fungi	p__unidentified	c__unidentified	o__unidentified	f__unidentified	g__unidentified	s__unidentified	0	0	0	0	0	0	0	0	0	0	0	0	0	0	0	0	0	0	0	0	0	0	0	0	0	0	0	0	0	0	0	0	0	0	0	0	0	0	0	0	0	0
000821fa00c76ebf15891785b61b422e	k__Fungi	p__Chytridiomycota	c__unidentified	o__unidentified	f__unidentified	g__unidentified	s__unidentified	0	0	0	0	0	0	0	0	0	0	0	0	0	0	0	0	0	0	0	0	0	0	0	0	0	0	0	0	0	0	0	0	0	0	0	0	0	0	0	0	0	0
000b30e4922cbc5d8d2f180850227ea7	k__Fungi	p__Ascomycota	c__unidentified	o__unidentified	f__unidentified	g__unidentified	s__unidentified	0	0	0	0	0	0	0	0	0	0	0	0	0	0	0	0	0	0	0	0	0	0	0	0	0	0	0	0	0	0	0	0	0	0	0	0	0	0	0	0	0	0
000c3ea8c6715e543d963e4cd90e83e1	k__Fungi	p__unidentified	c__unidentified	o__unidentified	f__unidentified	g__unidentified	s__unidentified	0	0	0	0	0	0	0	0	0	0	0	0	0	0	0	0	0	0	0	0	0	0	0	0	0	0	0	0	0	0	0	0	0	0	0	0	0	0	0	0	0	0
001338a0122f54b96d8f2c46a4653102	k__Fungi	p__unidentified	c__unidentified	o__unidentified	f__unidentified	g__unidentified	s__unidentified	0	0	0	0	0	0	0	0	0	0	0	0	0	0	0	0	0	0	0	0	0	0	0	0	0	0	0	0	0	0	0	0	0	0	0	0	0	0	0	0	0	0
0017dd0483c63eb36a2143c0132f835a	k__Fungi	p__unidentified	c__unidentified	o__unidentified	f__unidentified	g__unidentified	s__unidentified	0	55	15	0	0	0	0	0	0	0	0	0	0	0	0	0	0	0	0	0	0	0	0	0	0	0	0	0	0	0	0	0	0	0	0	0	0	0	0	22	0	0
001eda9fa25087cc7f85bb0a82116882	k__Fungi	p__unidentified	c__unidentified	o__unidentified	f__unidentified	g__unidentified	s__unidentified	0	0	0	0	0	0	0	0	0	0	0	0	0	0	0	0	0	0	0	0	0	0	0	0	0	0	0	0	0	0	0	0	0	0	0	0	0	0	0	0	0	0
001f73e0d8c6d87b34a233fa7df8764e	k__Fungi	p__unidentified	c__unidentified	o__unidentified	f__unidentified	g__unidentified	s__unidentified	0	0	0	0	0	0	0	0	0	0	0	0	0	0	0	0	0	0	0	0	0	0	0	0	0	0	0	0	0	0	0	0	0	0	0	0	0	0	0	0	0	0
0024b1c99f5102f0061a6d7f5142f413	k__Fungi	p__unidentified	c__unidentified	o__unidentified	f__unidentified	g__unidentified	s__unidentified	0	0	0	0	0	0	0	0	0	0	0	0	0	0	0	0	0	0	0	0	0	0	0	0	0	0	0	0	0	0	0	0	0	0	0	0	0	0	0	0	0	0
0025597f6a70d3b4903955a1b5209b68	k__Fungi	p__unidentified	c__unidentified	o__unidentified	f__unidentified	g__unidentified	s__unidentified	0	0	0	0	0	0	0	0	0	0	0	0	0	0	0	0	0	0	0	0	0	0	0	0	0	0	0	0	0	0	0	0	0	0	0	0	0	0	0	0	0	0
0026a6c86bb9c6e218327dd03c3ee609	k__Fungi	p__unidentified	c__unidentified	o__unidentified	f__unidentified	g__unidentified	s__unidentified	0	0	0	0	0	0	0	0	0	0	0	0	0	0	0	0	0	0	0	0	0	0	0	0	0	0	0	0	0	0	0	0	0	0	0	0	0	0	0	0	0	0
0026b8185d0ffef98db9c662341121d9	k__Fungi	p__unidentified	c__unidentified	o__unidentified	f__unidentified	g__unidentified	s__unidentified	0	0	0	0	0	0	0	0	0	0	0	0	0	0	0	0	0	0	0	0	0	0	0	0	0	0	170	0	0	0	0	0	0	0	0	0	0	0	0	0	0	0
0028892da49aa27758d9f0ca0b4bc47d	k__Fungi	p__unidentified	c__unidentified	o__unidentified	f__unidentified	g__unidentified	s__unidentified	0	0	0	5	0	0	0	0	0	0	0	0	0	0	0	0	0	0	0	0	0	0	0	0	0	0	0	0	0	0	0	0	0	0	0	0	0	0	0	0	0	0
002adacc8576de0520b8c7872ffd1590	k__Fungi	p__Ascomycota	c__Leotiomycetes	o__Helotiales	f__Hyaloscyphaceae	g__Hyphodiscus	s__unidentified	0	0	0	0	0	0	0	0	0	0	0	0	0	0	0	0	0	0	0	0	0	0	0	0	0	0	0	0	0	0	0	0	0	0	0	0	0	0	0	0	0	0
002d92b01fe98156ae7cd7a6a515402c	k__Fungi	p__Ascomycota	c__Sordariomycetes	o__Hypocreales	f__Nectriaceae	g__Xenoacremonium	s__Xenoacremonium_falcatum	0	0	0	10	0	0	0	0	0	0	0	0	0	0	0	0	0	0	0	0	0	0	0	0	0	0	0	0	0	0	0	0	0	0	0	0	0	0	0	0	0	0
002df1476a1269c6f0d3cabb2710bcfd	k__Fungi	p__unidentified	c__unidentified	o__unidentified	f__unidentified	g__unidentified	s__unidentified	0	0	0	0	0	0	0	0	0	0	0	0	0	0	0	0	0	0	0	0	0	0	0	0	0	0	0	0	0	0	0	0	0	0	0	0	0	0	0	0	0	0
002df7448f2310960038a6948edc091c	k__Fungi	p__unidentified	c__unidentified	o__unidentified	f__unidentified	g__unidentified	s__unidentified	0	0	0	0	0	0	0	0	0	0	0	0	0	0	0	0	0	0	0	0	0	0	0	0	0	0	0	0	0	0	0	0	0	0	0	0	0	0	0	0	0	0
002e7efbbf9035483dbb956ae03f7f72	k__Fungi	p__unidentified	c__unidentified	o__unidentified	f__unidentified	g__unidentified	s__unidentified	0	0	0	0	0	0	0	0	0	0	0	0	0	0	0	0	0	0	0	0	0	0	0	0	0	0	0	0	0	0	0	0	0	0	0	0	0	0	0	54	0	0
00325c0126364189527ded223e0c99b8	k__Fungi	p__unidentified	c__unidentified	o__unidentified	f__unidentified	g__unidentified	s__unidentified	0	0	0	0	0	0	0	0	0	0	0	0	0	0	0	0	0	0	0	0	0	0	0	0	0	0	0	0	0	0	0	0	0	0	0	0	0	0	0	0	0	0
003709f0025046a9c3100687683df706	k__Fungi	p__unidentified	c__unidentified	o__unidentified	f__unidentified	g__unidentified	s__unidentified	0	0	0	0	0	0	0	0	0	0	0	0	0	0	0	0	0	0	0	0	0	0	0	0	0	0	0	0	0	0	0	0	0	0	0	0	0	0	0	0	0	0
003db9b0a700ce6a36599faa95520004	k__Fungi	p__unidentified	c__unidentified	o__unidentified	f__unidentified	g__unidentified	s__unidentified	0	0	0	0	0	0	0	0	0	0	0	0	0	0	0	0	0	0	0	0	0	0	0	0	0	0	0	0	0	0	0	0	0	0	0	0	0	0	0	0	0	0
0044b1e9fa9f96613ca073727e361d18	k__Fungi	p__Rozellomycota	c__unidentified	o__unidentified	f__unidentified	g__unidentified	s__unidentified	0	0	0	0	0	0	0	0	0	0	0	0	0	0	0	0	0	0	0	0	0	0	0	0	0	0	0	0	0	0	0	0	0	0	0	0	0	0	0	0	0	0
0053ecfd1d211ac24e96fb4c08c623eb	k__Fungi	p__unidentified	c__unidentified	o__unidentified	f__unidentified	g__unidentified	s__unidentified	0	0	0	0	0	0	0	0	0	0	0	0	0	0	0	0	0	0	0	0	0	0	0	0	0	0	0	0	0	0	0	0	0	0	0	0	0	0	0	0	0	0
0055151166f0cb7c6de3b4c963096bbc	k__Fungi	p__unidentified	c__unidentified	o__unidentified	f__unidentified	g__unidentified	s__unidentified	0	0	0	0	0	0	0	0	0	0	0	0	0	0	0	0	0	0	0	0	0	0	0	0	0	0	0	0	0	0	0	0	0	0	0	3	0	0	0	0	0	0
0061b82ee7c25ed06b62a32c3a975fd7	k__Fungi	p__Basidiomycota	c__Agaricomycetes	o__Sebacinales	f__Serendipitaceae	g__Serendipita	s__unidentified	0	0	0	0	0	0	0	0	0	0	0	0	0	0	0	0	0	0	0	0	0	0	0	0	0	0	0	0	0	0	0	0	0	0	0	0	0	0	0	0	0	0
00640abee7a1966a1bc6c823e54c3b6c	k__Fungi	p__Basidiomycota	c__Microbotryomycetes	o__Kriegeriales	f__Camptobasidiaceae	g__Glaciozyma	s__Glaciozyma_antarctica	0	0	0	0	0	0	0	0	0	0	0	0	0	0	0	0	0	0	0	0	0	0	0	0	0	0	0	0	0	0	0	0	0	0	0	0	0	0	0	0	0	0
0064a682030a7cb9138e091e086c1483	k__Fungi	p__Ascomycota	c__unidentified	o__unidentified	f__unidentified	g__unidentified	s__unidentified	0	0	0	0	0	0	0	0	0	0	0	0	0	0	0	0	0	0	0	0	0	0	0	0	0	0	0	0	0	0	0	0	0	0	0	0	0	0	0	0	0	0
0069905c430924f9b7531bd281b986ac	k__Fungi	p__unidentified	c__unidentified	o__unidentified	f__unidentified	g__unidentified	s__unidentified	0	0	0	0	0	0	0	0	0	0	0	0	0	0	0	0	0	0	0	0	0	0	0	0	0	0	0	0	0	0	0	0	0	0	0	0	0	0	0	0	0	0
006b6ef01053966bf41d5eed29b09534	k__Fungi	p__unidentified	c__unidentified	o__unidentified	f__unidentified	g__unidentified	s__unidentified	0	0	0	0	0	0	0	0	0	0	0	0	0	0	0	0	0	0	0	0	0	0	0	0	0	0	0	0	0	0	0	0	0	0	0	0	0	0	0	0	0	0
006d0c20a60c4b9182b7b7a868529611	k__Fungi	p__Ascomycota	c__Lecanoromycetes	o__Caliciales	f__Physciaceae	g__Tetramelas	s__unidentified	0	0	0	0	0	0	0	0	0	0	0	0	0	0	0	0	0	0	0	0	0	0	0	0	0	0	0	0	0	0	0	0	0	0	0	0	0	0	0	0	0	0
007712f837f4941f8669c921ca8cac98	k__Fungi	p__unidentified	c__unidentified	o__unidentified	f__unidentified	g__unidentified	s__unidentified	0	0	0	0	0	0	0	0	0	0	0	0	0	0	0	0	0	0	0	0	0	0	0	0	0	0	0	0	0	0	0	0	0	0	0	0	0	0	0	0	0	0
007ca326946f43d1459c679b93ad04c5	k__Fungi	p__unidentified	c__unidentified	o__unidentified	f__unidentified	g__unidentified	s__unidentified	0	0	0	0	0	0	0	0	0	0	0	0	0	0	0	0	0	0	0	0	0	0	0	0	0	0	0	0	0	0	0	0	0	0	0	0	0	0	0	0	0	0
007dfcbd5e9dfdf7260110bdb55af619	k__Fungi	p__unidentified	c__unidentified	o__unidentified	f__unidentified	g__unidentified	s__unidentified	0	0	0	0	0	0	0	5	0	0	0	0	0	0	0	0	0	0	0	0	0	0	0	0	0	0	0	0	0	0	0	0	0	0	0	0	0	0	0	0	0	0
0089192f66cc2db91e9fc2d8f553308a	k__Fungi	p__unidentified	c__unidentified	o__unidentified	f__unidentified	g__unidentified	s__unidentified	0	0	0	0	0	0	0	0	0	0	0	0	0	0	0	0	0	0	0	0	46	0	0	0	0	0	0	0	0	0	0	0	0	0	0	0	0	0	0	0	0	0
008e5813fb888e95ce5e3b3a3463e4b6	k__Fungi	p__unidentified	c__unidentified	o__unidentified	f__unidentified	g__unidentified	s__unidentified	0	0	0	0	0	0	0	0	0	0	0	0	0	0	0	0	0	0	0	0	0	0	0	0	0	0	0	0	0	0	0	0	0	0	0	0	0	0	0	0	0	0
0090e2d9fec824759a76b21c617f606c	k__Fungi	p__Ascomycota	c__unidentified	o__unidentified	f__unidentified	g__unidentified	s__unidentified	0	0	0	0	0	0	0	0	0	0	0	0	0	0	0	0	0	0	0	0	0	0	0	0	0	0	0	0	0	0	0	0	0	0	0	0	0	0	0	0	0	0
00927f17c845c9c773ea3ddbe32d9b90	k__Fungi	p__Ascomycota	c__unidentified	o__unidentified	f__unidentified	g__unidentified	s__unidentified	0	0	0	0	0	0	0	0	0	0	0	0	0	0	0	0	0	0	0	0	0	0	0	0	0	0	0	0	0	0	0	0	0	0	0	0	0	0	0	0	0	0
00937bd2c8854b55b27ef04e26f7b560	k__Fungi	p__unidentified	c__unidentified	o__unidentified	f__unidentified	g__unidentified	s__unidentified	0	0	0	0	0	0	0	0	0	0	0	0	0	0	0	0	0	0	0	0	0	0	0	0	0	0	0	0	0	0	0	0	0	0	0	0	0	0	0	0	0	0
0098ba789814c2dfdda26c083037a2cb	k__Fungi	p__Chytridiomycota	c__unidentified	o__unidentified	f__unidentified	g__unidentified	s__unidentified	0	0	0	0	0	0	0	0	0	0	0	0	0	0	0	0	0	0	0	0	0	0	0	0	0	0	0	0	0	0	0	0	0	0	0	0	0	0	0	0	0	0
009e3a26fa73aaecae568410a6a1282a	k__Fungi	p__unidentified	c__unidentified	o__unidentified	f__unidentified	g__unidentified	s__unidentified	0	0	0	0	0	0	0	0	0	0	0	0	0	0	0	0	0	0	0	0	0	0	0	0	0	0	0	0	0	0	0	0	0	0	0	0	0	0	0	0	0	0
00a1dbb208e7c93f4fc2573bcdde3f3d	k__Fungi	p__unidentified	c__unidentified	o__unidentified	f__unidentified	g__unidentified	s__unidentified	0	0	0	0	0	0	0	0	0	0	0	0	0	0	0	0	0	0	0	0	0	0	0	0	0	0	0	0	0	0	0	0	0	0	0	0	0	0	0	0	0	0
00a8441e5bde042b0d18104a96f17418	k__Fungi	p__unidentified	c__unidentified	o__unidentified	f__unidentified	g__unidentified	s__unidentified	0	0	0	0	0	0	0	0	0	0	0	0	0	0	0	0	108	0	0	0	0	0	0	0	0	0	0	0	0	0	0	0	0	0	0	0	0	0	0	0	0	0
00b0a5f676986f20f67cb9d0ccfd0f46	k__Fungi	p__unidentified	c__unidentified	o__unidentified	f__unidentified	g__unidentified	s__unidentified	0	0	0	10	0	0	0	0	0	0	0	0	0	0	0	0	0	0	0	0	0	0	0	0	0	0	0	0	0	0	0	0	0	0	0	0	0	0	0	0	0	0
00b15978283ab374fd3ee5a18ce5efef	k__Fungi	p__unidentified	c__unidentified	o__unidentified	f__unidentified	g__unidentified	s__unidentified	0	0	0	5	0	0	0	0	0	0	0	0	0	0	0	0	0	0	0	0	0	0	0	0	0	0	0	0	0	0	0	0	0	0	0	0	0	0	0	0	0	0
00b510e5edf4099da9a05e3c14a9af86	k__Fungi	p__unidentified	c__unidentified	o__unidentified	f__unidentified	g__unidentified	s__unidentified	0	0	0	0	0	0	0	0	0	0	0	0	0	0	0	0	0	0	0	0	0	0	0	0	0	0	0	0	0	0	0	0	0	0	0	0	0	0	0	0	0	0
00b6da1f849d9abe41ce127c89992a6a	k__Fungi	p__unidentified	c__unidentified	o__unidentified	f__unidentified	g__unidentified	s__unidentified	0	0	0	0	0	0	0	0	0	0	0	0	0	0	0	0	0	0	0	27	0	0	0	0	0	0	0	0	0	0	0	0	0	0	0	0	0	0	0	0	0	0
00bea1d21af42281bd23aa043d4328ad	k__Fungi	p__unidentified	c__unidentified	o__unidentified	f__unidentified	g__unidentified	s__unidentified	0	0	0	0	0	0	0	0	0	0	0	0	0	0	0	0	0	0	0	0	0	0	0	0	0	0	0	0	0	0	0	0	0	0	0	0	0	0	0	0	0	0
00c19132e359eeb388a0bbd558b4d2bd	k__Fungi	p__Ascomycota	c__Sordariomycetes	o__Xylariales	f__Xylariales_fam_Incertae_sedis	g__Hansfordia	s__unidentified	0	0	0	0	0	0	0	0	0	0	0	6	0	0	0	0	0	0	0	0	0	0	0	0	0	0	0	0	0	0	0	0	0	0	0	0	0	0	0	0	0	0
00c69cd4a8cf4478ebe647682daab530	k__Fungi	p__Ascomycota	c__Archaeorhizomycetes	o__Archaeorhizomycetales	f__Archaeorhizomycetaceae	g__Archaeorhizomyces	s__unidentified	0	0	0	0	0	0	0	0	0	0	0	0	0	0	0	0	0	0	0	0	0	0	0	0	0	0	0	0	0	0	0	0	0	0	0	0	0	0	0	0	0	0
00cb8af1ccefd8236b5c6fb37c42bdeb	k__Fungi	p__unidentified	c__unidentified	o__unidentified	f__unidentified	g__unidentified	s__unidentified	0	0	0	0	0	0	0	0	0	0	0	0	0	0	0	0	0	0	0	0	0	0	0	0	0	0	0	0	0	17	0	0	0	0	0	0	0	0	0	0	0	0
00d39b6b2220d14ef81dc0b0e4232314	k__Fungi	p__unidentified	c__unidentified	o__unidentified	f__unidentified	g__unidentified	s__unidentified	0	0	0	0	0	0	0	0	0	0	0	0	0	0	0	0	0	0	0	0	0	0	0	0	0	0	0	0	0	0	0	0	0	0	0	0	0	0	0	0	0	0
00d3bf4434ef16e4585b405b29c1c390	k__Fungi	p__Monoblepharomycota	c__Monoblepharidomycetes	o__Monoblepharidales	f__unidentified	g__unidentified	s__unidentified	0	0	0	0	0	0	0	0	0	0	0	0	0	0	0	0	0	0	0	0	0	0	0	0	0	0	0	35	0	0	0	0	0	0	0	0	0	0	0	0	0	0
00d7a36209f781ba1e7de5a594bc60e0	k__Fungi	p__Basidiomycota	c__Microbotryomycetes	o__Leucosporidiales	f__Leucosporidiaceae	g__Leucosporidium	s__unidentified	0	0	0	0	0	0	0	0	0	0	0	0	0	0	0	0	0	0	0	0	0	0	0	0	0	0	0	0	0	0	0	0	0	0	0	0	0	0	0	0	0	0
00d896c63b446720b078ec51a1ff9a30	k__Fungi	p__Chytridiomycota	c__unidentified	o__unidentified	f__unidentified	g__unidentified	s__unidentified	0	0	0	0	0	0	0	0	0	0	0	0	0	0	0	0	0	0	0	0	0	0	0	0	0	0	0	0	0	0	0	0	0	0	0	0	0	0	0	0	0	0
00dadc7a928d369f592ffe6e07a9f326	k__Fungi	p__unidentified	c__unidentified	o__unidentified	f__unidentified	g__unidentified	s__unidentified	0	0	0	0	0	0	0	0	0	0	0	0	0	0	0	0	0	0	0	0	0	0	0	0	8	0	0	0	0	0	0	0	0	0	0	0	0	0	0	0	0	0
00db7740ee2ddaaf0f6de91c5cdbc562	k__Fungi	p__unidentified	c__unidentified	o__unidentified	f__unidentified	g__unidentified	s__unidentified	0	0	0	0	0	0	0	0	0	0	0	0	0	0	0	0	0	0	0	0	0	0	0	0	0	0	0	0	0	0	0	0	0	0	0	0	0	0	0	0	0	0
00e733481fb91817ff03f843ac65dc69	k__Fungi	p__unidentified	c__unidentified	o__unidentified	f__unidentified	g__unidentified	s__unidentified	0	0	0	0	0	0	0	0	0	0	0	0	0	0	0	0	0	0	0	0	0	0	0	0	0	0	0	0	0	0	0	0	0	0	0	0	0	0	0	0	0	0
00e745df4dc28579d3261d9e7d164d2c	k__Fungi	p__unidentified	c__unidentified	o__unidentified	f__unidentified	g__unidentified	s__unidentified	0	0	0	0	0	0	0	0	0	0	0	0	0	0	0	0	0	0	0	0	0	0	0	0	0	0	0	0	0	0	0	0	0	0	0	0	0	0	0	0	0	0
00e846173886cbd416c3661b3df99adb	k__Fungi	p__unidentified	c__unidentified	o__unidentified	f__unidentified	g__unidentified	s__unidentified	0	0	0	0	0	0	0	0	0	0	0	0	0	0	0	0	0	0	0	0	0	0	0	0	0	0	359	0	0	0	0	0	0	0	0	0	0	0	0	0	0	0
00fa295a45616b08d495b0e8b5ecdb48	k__Fungi	p__Basidiomycota	c__Microbotryomycetes	o__unidentified	f__unidentified	g__unidentified	s__unidentified	0	0	0	0	0	0	0	0	0	0	0	0	17	0	0	0	0	0	0	36	0	0	0	0	0	0	0	0	0	0	0	0	0	0	0	0	0	0	0	0	0	0
00feb0182ec28e9201e86f2d8ee15455	k__Fungi	p__unidentified	c__unidentified	o__unidentified	f__unidentified	g__unidentified	s__unidentified	0	0	19	0	0	0	0	0	0	0	0	0	0	0	0	0	0	0	0	0	0	0	0	0	0	0	0	0	0	0	0	0	0	0	0	0	0	0	0	0	0	0
010160a9000b7a7e7d366f6ef4dc1253	k__Fungi	p__unidentified	c__unidentified	o__unidentified	f__unidentified	g__unidentified	s__unidentified	0	0	0	0	0	0	0	0	0	0	0	0	0	0	0	0	0	0	0	0	0	0	0	0	0	0	0	0	0	0	0	0	0	0	0	0	0	0	0	0	0	0
01036a736aad5ff6e1b9350e2a3aea5f	k__Fungi	p__Ascomycota	c__Leotiomycetes	o__Erysiphales	f__Erysiphaceae	g__Blumeria	s__unidentified	0	0	0	0	0	0	0	0	0	0	0	0	0	0	0	0	0	0	0	0	0	0	0	0	0	0	0	0	0	0	0	0	0	0	0	0	0	0	0	0	0	0
010430baf0aa24f4e73b35eba61b99e3	k__Fungi	p__Ascomycota	c__Sordariomycetes	o__Hypocreales	f__Hypocreales_fam_Incertae_sedis	g__Acremonium	s__Acremonium_furcatum	0	0	0	0	0	0	0	0	0	0	0	0	0	0	0	0	0	0	0	0	0	0	0	0	0	0	0	0	0	0	0	0	0	0	0	0	0	0	0	0	0	0
010557726ecd33f83ce58ed6a103b518	k__Fungi	p__unidentified	c__unidentified	o__unidentified	f__unidentified	g__unidentified	s__unidentified	0	0	0	0	0	0	0	0	0	0	0	0	0	0	0	0	0	0	0	0	0	0	0	0	0	0	0	0	0	0	0	0	0	0	0	0	0	0	0	0	0	0
0105f5371ffdfc71793d3159c59c8d4e	k__Fungi	p__unidentified	c__unidentified	o__unidentified	f__unidentified	g__unidentified	s__unidentified	0	0	0	0	0	0	0	0	0	0	0	0	0	0	0	0	0	0	0	0	0	0	0	0	0	0	0	0	0	0	0	0	0	0	0	0	0	0	0	0	0	0
010718f4db646b8a0e5d36a14b07605f	k__Fungi	p__Ascomycota	c__Dothideomycetes	o__Capnodiales	f__Teratosphaeriaceae	g__Recurvomyces	s__unidentified	0	0	0	0	0	0	0	0	0	0	0	0	0	0	0	0	0	0	0	0	0	0	0	0	0	0	0	0	0	0	0	0	0	0	0	0	0	0	0	0	0	0
010a930b7bc1957dd75d57d12c81ebcb	k__Fungi	p__unidentified	c__unidentified	o__unidentified	f__unidentified	g__unidentified	s__unidentified	0	0	0	0	0	0	0	0	0	0	0	0	0	0	0	0	0	0	0	0	0	0	0	0	0	0	0	0	0	0	0	0	0	0	0	0	0	0	0	0	0	0
010d6363073f296305174087310fb803	k__Fungi	p__unidentified	c__unidentified	o__unidentified	f__unidentified	g__unidentified	s__unidentified	0	0	0	0	0	0	0	0	0	0	0	0	0	0	0	0	0	0	0	0	0	0	0	0	0	0	0	0	0	0	0	0	0	0	0	0	7	0	0	0	0	0
0110139f9833589bbad8014712a6e808	k__Fungi	p__unidentified	c__unidentified	o__unidentified	f__unidentified	g__unidentified	s__unidentified	0	0	0	0	0	0	0	0	19	0	0	0	0	0	0	0	0	0	0	0	0	0	0	0	0	0	0	0	0	0	0	0	0	0	0	0	0	0	0	0	0	0
0116e78626a0b2cdf5262bf2f32e0d0d	k__Fungi	p__Ascomycota	c__Sordariomycetes	o__Hypocreales	f__Nectriaceae	g__Xenoacremonium	s__Xenoacremonium_falcatum	0	0	0	0	0	0	0	0	0	0	0	0	0	0	0	0	0	0	0	0	0	0	0	0	0	0	0	0	0	0	0	0	0	0	0	0	0	0	0	0	0	0
011863b64beb0a2076563dfe73c4e2b5	k__Fungi	p__Rozellomycota	c__unidentified	o__unidentified	f__unidentified	g__unidentified	s__unidentified	0	0	0	0	0	0	0	0	0	0	0	0	0	0	0	0	0	0	0	0	0	0	0	0	0	0	0	0	0	0	0	0	0	0	0	0	0	0	0	0	0	0
011e49233e2b722b331ca1270072b132	k__Fungi	p__unidentified	c__unidentified	o__unidentified	f__unidentified	g__unidentified	s__unidentified	0	0	0	0	0	0	0	0	0	0	0	0	0	0	0	0	0	0	0	0	0	0	0	0	0	0	0	0	0	0	0	0	0	0	0	0	0	0	0	0	0	0
0127ba59e52341298efc81a4b6591725	k__Fungi	p__unidentified	c__unidentified	o__unidentified	f__unidentified	g__unidentified	s__unidentified	0	0	0	0	0	0	0	0	0	0	0	0	0	0	0	0	0	0	0	0	0	0	0	0	0	0	0	0	0	0	0	0	0	0	0	0	0	0	0	0	0	0
012992035347bf52d5d4dfda99ee6eea	k__Fungi	p__unidentified	c__unidentified	o__unidentified	f__unidentified	g__unidentified	s__unidentified	0	0	0	0	0	0	0	0	0	0	0	0	0	0	0	0	0	0	0	0	0	0	0	0	0	0	0	0	0	0	0	0	0	0	0	0	0	0	0	0	0	0
0129ac3e9b1bd4e6665c778b418212a4	k__Fungi	p__Basidiomycota	c__Tremellomycetes	o__Cystofilobasidiales	f__Mrakiaceae	g__Itersonilia	s__Itersonilia_perplexans	0	0	0	9	0	0	0	0	0	0	0	0	0	0	0	0	0	0	0	0	0	0	0	0	0	0	0	0	0	0	0	0	0	0	0	0	0	0	0	0	0	0
012d3c9631c014ebe5be04812972adb0	k__Fungi	p__unidentified	c__unidentified	o__unidentified	f__unidentified	g__unidentified	s__unidentified	0	0	0	0	0	0	0	0	0	0	0	0	0	0	0	0	0	0	0	0	0	0	0	0	0	0	0	0	0	0	0	0	0	0	0	0	0	0	0	0	0	0
012eb74b6df0e35db71d88c57a3e5cf7	k__Fungi	p__unidentified	c__unidentified	o__unidentified	f__unidentified	g__unidentified	s__unidentified	0	0	0	0	0	0	0	0	0	0	0	0	0	0	0	0	0	0	0	0	0	0	0	0	0	0	0	0	0	0	0	0	0	0	0	0	0	0	0	0	0	0
01303bd707c4426650d284780dadb9a9	k__Fungi	p__Chytridiomycota	c__unidentified	o__unidentified	f__unidentified	g__unidentified	s__unidentified	0	0	0	0	0	0	0	0	0	0	0	0	0	0	0	0	0	0	0	0	0	0	0	0	0	0	0	0	0	0	0	0	0	0	0	0	0	0	0	0	0	0
013de8db4ab39a45da39b12e90e31892	k__Fungi	p__Ascomycota	c__Leotiomycetes	o__Helotiales	f__unidentified	g__unidentified	s__unidentified	0	0	0	0	0	0	0	0	0	0	0	0	0	0	20	0	0	0	0	0	0	0	0	0	0	0	0	0	0	0	0	0	0	0	0	0	0	0	0	0	0	0
013f58d01c15a14d1c5ce6ddebfcefb8	k__Fungi	p__unidentified	c__unidentified	o__unidentified	f__unidentified	g__unidentified	s__unidentified	0	0	0	0	0	0	0	0	0	0	0	0	0	0	0	0	0	0	0	0	0	0	0	0	0	0	0	0	0	0	0	0	0	0	0	0	0	0	0	0	0	0
0142411b256b09f8b0a8c997701f2953	k__Fungi	p__unidentified	c__unidentified	o__unidentified	f__unidentified	g__unidentified	s__unidentified	0	0	0	0	0	0	0	0	0	0	0	0	0	0	0	0	0	0	0	0	0	0	0	0	0	0	0	0	0	0	0	0	0	0	0	0	0	0	0	0	0	0
014575ab2fa3c5986b47273da87060c0	k__Fungi	p__unidentified	c__unidentified	o__unidentified	f__unidentified	g__unidentified	s__unidentified	0	0	0	0	0	0	0	0	0	0	0	0	0	0	0	0	0	0	0	0	0	0	0	0	0	0	0	0	0	0	0	0	0	0	0	0	0	0	0	0	0	0
0151f15461a0833f10d0b373a238e6f5	k__Fungi	p__unidentified	c__unidentified	o__unidentified	f__unidentified	g__unidentified	s__unidentified	0	0	0	0	0	0	0	0	0	0	0	0	0	0	0	0	0	0	0	0	0	0	0	0	0	0	0	0	0	0	0	0	0	0	0	0	0	0	0	0	0	0
0154c79e65a0975a29a8c6deb42f2258	k__Fungi	p__unidentified	c__unidentified	o__unidentified	f__unidentified	g__unidentified	s__unidentified	0	0	0	0	0	0	0	0	0	0	0	0	0	0	0	0	0	0	0	0	0	0	0	0	0	0	0	0	0	0	0	0	0	0	0	0	0	0	0	0	0	0
0155ee6dbfd7b55fbec1e82cb6dbdb81	k__Fungi	p__unidentified	c__unidentified	o__unidentified	f__unidentified	g__unidentified	s__unidentified	0	0	0	0	0	0	0	0	0	0	0	0	0	0	0	0	0	0	0	0	0	0	0	0	0	0	0	0	0	0	0	0	0	0	0	0	0	0	0	0	0	0
0156541d2455e46984ac93af961b9d23	k__Fungi	p__unidentified	c__unidentified	o__unidentified	f__unidentified	g__unidentified	s__unidentified	0	0	0	0	0	0	0	0	0	0	0	0	0	0	0	0	0	0	0	0	0	0	0	0	0	0	0	0	0	0	0	0	0	0	60	0	0	0	0	0	0	0
01570b2f7958ff70e14d2a26f2641c6a	k__Fungi	p__unidentified	c__unidentified	o__unidentified	f__unidentified	g__unidentified	s__unidentified	0	0	0	0	0	0	0	0	0	0	0	0	0	0	0	0	0	0	0	0	0	0	0	0	0	0	0	0	0	0	0	0	0	0	0	16	0	0	0	0	0	0
015eb2818ca970687faf32bd2ff84b6d	k__Fungi	p__unidentified	c__unidentified	o__unidentified	f__unidentified	g__unidentified	s__unidentified	0	0	0	0	0	0	0	0	0	0	0	0	0	0	0	0	0	0	0	3	0	0	0	0	0	0	0	0	0	0	0	0	0	0	0	0	0	0	0	0	0	0
0164550815ed83a08ba270a2079bc6c3	k__Fungi	p__unidentified	c__unidentified	o__unidentified	f__unidentified	g__unidentified	s__unidentified	0	0	0	0	0	0	0	0	0	0	0	0	0	0	0	0	0	0	0	0	0	0	0	0	0	0	0	0	0	0	0	0	0	0	0	0	0	0	0	0	0	0
0168fca2735c79abdd3dea0a34e79134	k__Fungi	p__unidentified	c__unidentified	o__unidentified	f__unidentified	g__unidentified	s__unidentified	0	0	0	0	0	0	0	0	0	0	0	0	0	0	0	0	0	0	0	0	0	0	0	0	0	0	0	0	0	0	0	0	0	0	0	0	0	0	0	0	0	0
0169adfc8396ea7c1fea020878aa237c	k__Fungi	p__unidentified	c__unidentified	o__unidentified	f__unidentified	g__unidentified	s__unidentified	0	0	0	0	0	0	0	0	0	0	0	0	0	0	0	0	0	0	0	0	0	0	0	0	0	0	0	0	0	0	0	0	0	0	0	0	0	0	0	0	0	0
016d2fa3580dfcd5bfdc50b5643c4f4b	k__Fungi	p__Ascomycota	c__Leotiomycetes	o__Helotiales	f__Helotiaceae	g__Tetracladium	s__unidentified	0	0	0	0	0	0	0	0	0	0	0	0	0	0	0	0	0	0	0	0	0	0	0	0	0	0	0	0	0	0	0	0	0	0	0	0	0	0	0	0	0	0
0170262aad153b4364452515234a9289	k__Fungi	p__unidentified	c__unidentified	o__unidentified	f__unidentified	g__unidentified	s__unidentified	0	0	0	0	0	0	0	0	0	0	0	0	0	0	0	0	0	0	0	0	0	0	0	0	0	0	0	0	0	0	0	0	0	0	0	0	0	0	0	0	0	0
0170af7cffe4cb2bcf9e5a2662c0bd09	k__Fungi	p__unidentified	c__unidentified	o__unidentified	f__unidentified	g__unidentified	s__unidentified	0	0	0	0	0	0	0	0	0	0	0	0	0	0	0	0	0	0	0	0	0	0	0	0	0	0	0	0	0	0	0	0	0	0	0	0	0	0	0	0	0	0
017215dbd0d1d1bbcd1ca0f8f46f9bcb	k__Fungi	p__unidentified	c__unidentified	o__unidentified	f__unidentified	g__unidentified	s__unidentified	0	0	0	0	0	0	0	0	0	0	0	0	0	0	0	0	0	0	0	0	0	0	0	0	0	0	0	0	0	0	0	0	0	0	0	0	0	0	0	0	0	0
018f290ea20d033c73b2f5397595914d	k__Fungi	p__Basidiomycota	c__Tremellomycetes	o__Filobasidiales	f__Filobasidiaceae	g__Naganishia	s__unidentified	0	0	0	0	0	0	0	0	6	0	0	0	0	0	0	0	0	0	0	0	0	0	0	0	0	0	0	0	0	0	0	0	0	0	0	0	0	0	0	0	0	0
019276e0fb0f1827779cefbfda1adf63	k__Fungi	p__unidentified	c__unidentified	o__unidentified	f__unidentified	g__unidentified	s__unidentified	0	0	0	0	0	0	0	0	0	0	0	0	0	0	0	0	0	0	0	0	0	0	0	0	0	0	0	0	0	0	0	0	0	0	0	0	0	0	0	0	0	0
0192a1e82f477e9d5a2fe63d21d95d34	k__Fungi	p__Basidiomycota	c__Microbotryomycetes	o__Sporidiobolales	f__Sporidiobolaceae	g__Rhodotorula	s__Rhodotorula_mucilaginosa	0	0	0	0	0	0	0	0	0	0	0	0	0	0	0	0	0	0	0	0	0	0	0	0	0	0	0	0	0	0	0	0	0	0	0	0	0	0	0	0	0	0
0192bb166089225eea07d2691d15da9f	k__Fungi	p__Ascomycota	c__Lecanoromycetes	o__Caliciales	f__Caliciaceae	g__Buellia	s__Buellia_frigida	0	0	0	0	0	0	0	0	0	0	0	0	0	0	0	0	0	0	0	0	0	0	0	0	0	0	0	0	0	0	0	0	0	0	0	0	0	0	0	0	0	0
0193c61d5ada117442e84a3c28ffbdd6	k__Fungi	p__Ascomycota	c__Dothideomycetes	o__Capnodiales	f__unidentified	g__unidentified	s__unidentified	0	0	0	0	0	0	0	0	0	0	0	0	0	0	0	0	0	0	0	0	0	0	0	0	0	0	0	0	0	0	0	0	0	0	0	0	0	0	0	0	0	0
019891abf19354827bf3902dbfbd8a7d	k__Fungi	p__unidentified	c__unidentified	o__unidentified	f__unidentified	g__unidentified	s__unidentified	0	0	0	0	0	0	0	0	0	0	0	0	0	0	0	0	0	0	0	0	0	0	0	0	0	0	0	0	0	0	0	0	0	0	0	0	0	0	0	0	0	0
019e3172d39aad36d8cc3f9189782655	k__Fungi	p__Basidiomycota	c__unidentified	o__unidentified	f__unidentified	g__unidentified	s__unidentified	0	0	0	0	0	0	0	0	0	0	0	0	0	0	0	0	0	0	0	0	0	0	0	0	0	0	0	0	0	0	0	0	0	0	0	0	0	0	0	0	0	0
01a270309e65a9e797ba67d48b7d2422	k__Fungi	p__unidentified	c__unidentified	o__unidentified	f__unidentified	g__unidentified	s__unidentified	0	0	0	0	0	0	0	0	0	0	0	0	0	0	0	0	0	0	0	0	0	0	0	0	0	0	0	0	0	0	0	0	0	0	0	0	0	0	0	0	0	0
01a5b2d4dd57353171b7d13dc9ca582b	k__Fungi	p__unidentified	c__unidentified	o__unidentified	f__unidentified	g__unidentified	s__unidentified	0	0	0	0	0	0	0	0	0	0	0	0	0	0	0	0	0	0	0	0	0	0	0	0	0	0	0	0	0	0	0	0	0	0	0	0	0	0	0	0	0	0
01a65bda6deead9783a0ca84bc51ca38	k__Fungi	p__Chytridiomycota	c__unidentified	o__unidentified	f__unidentified	g__unidentified	s__unidentified	0	0	0	0	0	0	0	0	0	0	0	0	0	0	0	0	0	0	0	0	0	0	0	0	0	0	528	0	0	0	0	0	0	0	0	0	0	0	0	0	0	0
01aaa55d4a1fce462d2f60bdf916e04a	k__Fungi	p__unidentified	c__unidentified	o__unidentified	f__unidentified	g__unidentified	s__unidentified	0	0	0	0	0	0	0	0	0	0	0	0	0	0	0	0	0	0	0	0	0	0	0	0	0	0	0	0	0	0	0	0	0	0	0	0	0	0	0	0	0	0
01aaa6c2e62b77d3435c0f8ec3abc705	k__Fungi	p__unidentified	c__unidentified	o__unidentified	f__unidentified	g__unidentified	s__unidentified	0	0	0	0	0	0	0	0	0	0	0	0	0	0	0	0	0	0	0	0	0	0	0	0	0	0	0	0	0	0	0	0	0	0	0	0	0	0	0	0	0	0
01aca929bdcb7fd4a6d983756ddf9885	k__Fungi	p__unidentified	c__unidentified	o__unidentified	f__unidentified	g__unidentified	s__unidentified	0	0	0	0	0	0	0	0	0	0	0	12	0	0	0	0	0	0	0	0	0	0	0	0	0	0	0	0	0	0	0	0	0	0	0	0	0	0	0	0	0	0
01b0c8e54a98b62a42ef32162f32636d	k__Fungi	p__unidentified	c__unidentified	o__unidentified	f__unidentified	g__unidentified	s__unidentified	0	0	0	0	0	0	0	0	0	0	0	0	0	0	0	0	0	0	0	0	0	0	0	0	0	0	0	0	0	0	0	0	0	5	0	0	0	0	0	0	0	0
01b61ac47e30f7566ad72a7547f90396	k__Fungi	p__unidentified	c__unidentified	o__unidentified	f__unidentified	g__unidentified	s__unidentified	0	0	0	0	0	0	0	0	0	0	0	0	0	0	0	0	0	0	0	0	0	0	0	0	0	0	0	0	0	0	0	0	0	0	0	0	0	0	0	0	0	0
01b75e3a8ae10d99752921cf58792359	k__Fungi	p__unidentified	c__unidentified	o__unidentified	f__unidentified	g__unidentified	s__unidentified	0	0	0	0	0	0	0	0	0	0	0	0	0	0	0	0	0	0	0	0	0	0	0	0	0	0	0	0	0	0	0	0	0	0	0	0	0	0	0	0	0	0
01bbd0d7b40fed5d519e1ab0b9d422d2	k__Fungi	p__unidentified	c__unidentified	o__unidentified	f__unidentified	g__unidentified	s__unidentified	0	0	0	0	0	0	0	0	0	0	0	0	0	0	0	0	0	0	0	0	0	0	0	0	0	0	0	0	0	0	0	0	0	0	0	0	0	0	0	0	0	0
01c0c82d561a67129328364eccd1a604	k__Fungi	p__Ascomycota	c__Leotiomycetes	o__Helotiales	f__Helotiaceae	g__unidentified	s__unidentified	0	0	0	0	0	0	0	0	0	0	0	0	0	0	0	0	0	0	0	0	0	0	0	0	0	0	0	0	0	0	0	0	0	0	0	0	0	0	0	0	0	0
01c34e4ccb66030d0b32a6ca17e4c0a4	k__Fungi	p__unidentified	c__unidentified	o__unidentified	f__unidentified	g__unidentified	s__unidentified	0	0	0	0	0	0	0	0	0	0	0	0	0	0	0	0	0	0	0	0	0	0	0	0	0	0	0	0	0	0	0	0	0	0	0	0	0	0	0	0	0	0
01c69e3e15c2e0b5c65a83ee7eddc45a	k__Fungi	p__unidentified	c__unidentified	o__unidentified	f__unidentified	g__unidentified	s__unidentified	0	0	0	0	0	0	0	0	0	0	0	0	0	0	0	0	0	0	0	0	0	0	0	0	0	0	0	0	0	0	0	0	0	0	0	0	0	0	0	0	0	0
01c6fc5197d96e5227ac858e6cb20a11	k__Fungi	p__unidentified	c__unidentified	o__unidentified	f__unidentified	g__unidentified	s__unidentified	0	0	0	0	0	0	0	0	0	0	0	0	0	0	0	0	0	0	0	0	0	0	0	0	0	0	0	0	0	0	0	0	0	0	0	0	0	0	0	0	0	0
01d166368f99fe8fd64491b10c6dd2ff	k__Fungi	p__Mortierellomycota	c__Mortierellomycetes	o__Mortierellales	f__Mortierellaceae	g__Mortierella	s__unidentified	0	0	0	0	0	0	0	0	0	0	0	0	0	0	0	0	0	0	0	0	0	0	0	0	0	0	0	0	0	0	0	0	0	0	0	0	0	0	0	0	0	0
01d523a2ff72f502ee90200b8ffafae0	k__Fungi	p__unidentified	c__unidentified	o__unidentified	f__unidentified	g__unidentified	s__unidentified	0	0	0	0	0	0	0	0	0	0	0	0	0	0	0	0	0	0	0	0	0	0	0	0	0	0	0	0	0	0	0	0	0	0	0	0	0	0	0	0	0	0
01d632cd1ad5a677dd24c7ca461dd166	k__Fungi	p__Basidiomycota	c__Microbotryomycetes	o__Kriegeriales	f__Kriegeriaceae	g__Phenoliferia	s__Phenoliferia_psychrophila	0	0	0	0	0	0	0	0	0	0	0	0	0	0	0	0	0	0	0	0	22	0	0	0	0	0	0	0	0	0	0	0	0	0	0	0	0	0	0	0	0	0
01d795882fe987e78a7da3b28122c561	k__Fungi	p__Basidiomycota	c__unidentified	o__unidentified	f__unidentified	g__unidentified	s__unidentified	0	0	0	0	0	0	0	0	0	0	0	0	0	0	0	0	0	0	0	0	0	0	0	0	0	0	0	0	0	0	0	0	0	0	0	0	0	0	0	0	0	0
01d8070b73b6d13792130d87d389a884	k__Fungi	p__Chytridiomycota	c__unidentified	o__unidentified	f__unidentified	g__unidentified	s__unidentified	0	0	0	0	0	0	0	0	0	0	0	0	0	0	0	0	0	0	0	0	0	0	0	0	0	0	0	0	0	0	0	0	0	0	0	0	0	0	0	0	0	0
01e4ae5260246e52851cd445312806e0	k__Fungi	p__Ascomycota	c__Sordariomycetes	o__Sordariales	f__Sordariales_fam_Incertae_sedis	g__Remersonia	s__Remersonia_thermophila	0	0	0	0	0	0	0	0	0	0	0	0	0	0	0	0	0	0	0	0	0	0	0	0	0	0	0	0	0	0	0	0	0	0	0	0	0	0	0	0	0	0
01e5fc2b58ddc655d40b88fcfda2c82e	k__Fungi	p__unidentified	c__unidentified	o__unidentified	f__unidentified	g__unidentified	s__unidentified	0	0	0	15	0	0	0	0	0	0	0	0	0	0	0	0	0	0	0	0	0	0	0	0	0	0	0	0	0	0	0	0	0	0	0	0	0	0	0	0	0	0
01e6777b05674fccfbc6e3f98698a60e	k__Fungi	p__Chytridiomycota	c__unidentified	o__unidentified	f__unidentified	g__unidentified	s__unidentified	0	0	0	0	0	0	0	0	0	0	0	0	0	0	0	0	0	0	0	0	0	0	0	0	0	0	0	0	0	0	0	0	0	0	0	0	0	0	0	0	0	0
01e757e50e5f176ecbeef2954688d60d	k__Fungi	p__unidentified	c__unidentified	o__unidentified	f__unidentified	g__unidentified	s__unidentified	0	0	0	0	0	0	0	0	0	0	0	0	0	0	0	0	0	0	0	0	0	0	0	0	0	0	0	0	0	0	0	0	0	0	0	0	0	0	0	0	0	0
01eb86358d95b9509a77ae129994dffa	k__Fungi	p__unidentified	c__unidentified	o__unidentified	f__unidentified	g__unidentified	s__unidentified	0	0	0	0	0	0	0	0	0	0	0	0	0	0	0	0	0	0	0	0	0	0	0	0	0	0	0	0	0	0	0	0	0	0	0	0	0	0	0	0	0	0
01ef9fc9980d68e2a6a9668034a1b0f9	k__Fungi	p__unidentified	c__unidentified	o__unidentified	f__unidentified	g__unidentified	s__unidentified	0	0	0	0	0	0	0	0	0	0	0	0	0	0	0	0	0	0	0	0	0	0	0	0	0	0	0	0	0	0	0	0	0	0	0	0	0	0	0	0	0	0
01f4a0d4baa59f877be34830c16835e3	k__Fungi	p__unidentified	c__unidentified	o__unidentified	f__unidentified	g__unidentified	s__unidentified	0	0	0	0	0	0	0	0	0	0	0	0	0	0	0	0	0	0	0	0	0	0	0	0	0	0	0	0	0	0	0	0	0	0	0	0	0	0	0	0	0	2
01f620c424a7638dfe261c5c55272630	k__Fungi	p__Ascomycota	c__Leotiomycetes	o__Helotiales	f__Helotiales_fam_Incertae_sedis	g__Volucrispora	s__Volucrispora_graminea	0	0	0	0	0	0	0	0	0	0	0	0	0	0	0	0	0	0	0	0	0	0	0	0	0	0	0	0	0	0	0	0	0	0	0	0	0	0	0	0	0	0
01f796c02c43af245cd53ad3a5b0df1a	k__Fungi	p__unidentified	c__unidentified	o__unidentified	f__unidentified	g__unidentified	s__unidentified	0	0	0	0	0	0	0	0	0	0	0	0	0	0	0	0	0	0	0	0	0	0	0	0	0	0	0	0	0	0	0	0	0	0	0	0	0	0	0	0	0	0
01fa33005ca51c6d41f14c9d9a53d22e	k__Fungi	p__unidentified	c__unidentified	o__unidentified	f__unidentified	g__unidentified	s__unidentified	0	0	0	0	0	0	0	0	0	0	0	0	0	0	0	0	0	0	0	0	0	0	0	0	0	0	0	0	0	0	0	0	0	0	0	0	0	0	0	0	0	0
01fdb1c4c60c25d6beed78adaaae0ae2	k__Fungi	p__Ascomycota	c__Dothideomycetes	o__Capnodiales	f__unidentified	g__unidentified	s__unidentified	0	0	0	0	0	0	0	0	0	0	0	0	0	0	0	0	0	0	0	0	0	0	0	0	0	0	0	0	0	0	0	0	0	0	0	0	0	0	0	0	0	0
020045320ef3d955886b4a8788a1fef5	k__Fungi	p__unidentified	c__unidentified	o__unidentified	f__unidentified	g__unidentified	s__unidentified	0	0	0	0	0	0	0	0	0	0	0	0	0	0	0	0	0	0	0	0	0	0	0	0	0	0	0	0	0	0	0	0	0	0	0	0	0	0	0	0	0	0
0201eb28780b8f0cf6878adad7586a68	k__Fungi	p__unidentified	c__unidentified	o__unidentified	f__unidentified	g__unidentified	s__unidentified	0	0	0	0	0	0	0	0	0	0	0	0	0	0	0	0	0	0	0	0	0	0	0	0	0	0	0	0	0	0	0	0	0	0	0	0	0	0	0	0	0	0
02020943b64ac8644345c5996527132f	k__Fungi	p__unidentified	c__unidentified	o__unidentified	f__unidentified	g__unidentified	s__unidentified	0	0	0	0	56	0	0	0	26	0	0	3	0	0	0	0	0	0	0	0	0	0	0	0	0	0	0	0	0	0	0	0	0	0	0	0	0	0	0	0	179	0
02022aa19daa353ebecdf0b0ccf9012c	k__Fungi	p__unidentified	c__unidentified	o__unidentified	f__unidentified	g__unidentified	s__unidentified	0	0	0	0	0	0	0	0	0	0	0	0	0	0	0	0	0	0	0	0	0	0	0	0	0	0	0	0	0	0	0	0	0	0	0	0	0	0	0	0	0	0
02051a1ddee688cbf9885fe82eecb745	k__Fungi	p__Ascomycota	c__Dothideomycetes	o__Pleosporales	f__Didymellaceae	g__Peyronellaea	s__Peyronellaea_eucalypti	0	0	0	0	0	0	0	0	0	0	0	0	0	0	0	0	0	0	0	0	0	0	0	0	0	0	0	0	0	0	0	0	0	0	0	0	0	0	0	0	0	0
020b771c0b668fb66a724d9912b3b509	k__Fungi	p__unidentified	c__unidentified	o__unidentified	f__unidentified	g__unidentified	s__unidentified	0	0	0	0	0	0	0	0	0	0	0	0	0	0	0	0	0	0	0	0	0	0	0	0	0	0	0	0	0	0	0	0	0	0	0	0	0	0	0	0	0	0
020dfa1fb46e34bb400efe6d2f22394d	k__Fungi	p__Ascomycota	c__Sordariomycetes	o__Hypocreales	f__Hypocreales_fam_Incertae_sedis	g__Acremonium	s__Acremonium_biseptum	0	0	0	0	0	0	0	0	5	0	0	0	0	0	0	0	0	0	0	0	0	0	0	0	0	0	0	0	0	0	0	0	0	0	0	0	0	0	0	0	0	0
0215b77542abcf69d6aad07dd9fae731	k__Fungi	p__unidentified	c__unidentified	o__unidentified	f__unidentified	g__unidentified	s__unidentified	0	0	0	0	0	0	0	0	0	0	0	0	0	0	0	0	0	0	0	0	0	0	0	0	0	0	0	0	0	0	0	0	0	0	0	0	0	0	0	0	0	0
02164af8844fd67ed18262f2d58fc13b	k__Fungi	p__unidentified	c__unidentified	o__unidentified	f__unidentified	g__unidentified	s__unidentified	0	0	0	0	0	0	0	0	0	0	0	0	0	0	0	0	0	0	0	0	0	0	0	0	0	0	0	0	0	0	0	0	0	0	0	0	0	0	0	0	0	0
021aec0b4335c9c7f821a25fceab109c	k__Fungi	p__Basidiomycota	c__Microbotryomycetes	o__Kriegeriales	f__Kriegeriaceae	g__Phenoliferia	s__Phenoliferia_psychrophila	0	0	0	0	0	0	0	0	0	0	0	0	0	0	0	0	0	0	0	0	0	0	0	0	0	0	0	0	0	0	0	0	0	0	0	0	0	0	0	0	0	0
021eb1afda49ff861f338643f652da2e	k__Fungi	p__unidentified	c__unidentified	o__unidentified	f__unidentified	g__unidentified	s__unidentified	0	0	0	0	0	0	0	0	0	0	0	0	0	0	0	0	0	0	0	0	0	0	0	0	0	0	0	0	0	0	0	0	0	0	0	0	0	0	0	0	0	0
02202f31d5557edfb06291b027ca40b1	k__Fungi	p__unidentified	c__unidentified	o__unidentified	f__unidentified	g__unidentified	s__unidentified	0	0	0	0	0	0	0	0	0	0	0	0	0	0	0	0	0	0	0	0	0	0	0	0	0	0	0	0	0	0	0	0	0	0	0	0	0	0	0	0	0	0
02286b6ecf502b3bdbff64493a3bb64d	k__Fungi	p__Ascomycota	c__unidentified	o__unidentified	f__unidentified	g__unidentified	s__unidentified	0	0	0	0	0	0	0	0	0	0	0	0	0	0	0	0	0	0	0	0	0	0	0	0	0	0	0	0	0	0	0	0	0	0	0	0	0	0	0	0	0	0
0229bde135374e4f1bbc6e239f7e0868	k__Fungi	p__unidentified	c__unidentified	o__unidentified	f__unidentified	g__unidentified	s__unidentified	0	0	0	0	331	0	0	0	204	0	0	80	0	0	0	0	0	0	0	0	0	0	0	0	0	0	0	0	0	0	0	0	0	0	0	0	0	0	0	0	0	0
022a3c565b0dfbd097f9c27a4a974c60	k__Fungi	p__unidentified	c__unidentified	o__unidentified	f__unidentified	g__unidentified	s__unidentified	0	0	0	0	0	0	0	0	0	0	0	0	0	0	0	0	0	0	0	0	0	0	0	0	0	0	0	0	0	0	0	0	0	0	0	0	0	0	0	0	0	0
022e7d32ffe9c1011b8858331dede2e4	k__Fungi	p__unidentified	c__unidentified	o__unidentified	f__unidentified	g__unidentified	s__unidentified	0	0	0	0	0	0	0	0	0	0	0	0	0	0	0	0	0	0	0	0	0	0	0	0	0	0	0	0	0	0	0	0	0	0	0	0	0	0	0	0	0	0
02305302d70df4ecba69cf5eb47a69e9	k__Fungi	p__unidentified	c__unidentified	o__unidentified	f__unidentified	g__unidentified	s__unidentified	0	0	0	0	0	0	0	0	0	0	0	0	0	0	0	0	0	0	0	0	0	0	0	0	0	0	0	0	0	0	0	0	0	0	0	0	0	0	0	0	0	0
02309d0078881902d8aa1e2da5325100	k__Fungi	p__Ascomycota	c__Eurotiomycetes	o__Eurotiales	f__Trichocomaceae	g__Talaromyces	s__Talaromyces_funiculosus	0	0	0	17	0	0	0	0	0	0	0	0	0	0	11	0	0	0	0	0	0	0	0	0	0	0	208	0	0	0	0	0	0	0	0	0	0	0	0	0	0	0
02309db266dc97f147609bfab76e75ed	k__Fungi	p__unidentified	c__unidentified	o__unidentified	f__unidentified	g__unidentified	s__unidentified	0	0	0	0	0	0	0	0	0	0	0	0	0	0	0	0	0	0	0	0	0	0	0	0	0	0	0	0	0	0	0	0	0	0	0	0	0	0	0	0	0	0
0232705fdf17e2a46942ac3cd8f30b7f	k__Fungi	p__unidentified	c__unidentified	o__unidentified	f__unidentified	g__unidentified	s__unidentified	0	0	0	0	0	0	0	0	0	0	0	0	0	0	0	0	0	0	0	0	0	0	0	0	0	0	0	0	0	0	0	0	0	0	0	0	0	0	0	0	0	0
0234c26ae5efde15f2c64771550d24af	k__Fungi	p__unidentified	c__unidentified	o__unidentified	f__unidentified	g__unidentified	s__unidentified	11	0	0	0	0	0	23	18	0	0	0	0	39	0	0	0	0	0	0	0	0	0	0	0	0	0	0	0	0	0	30	0	0	0	0	0	0	0	0	0	0	0
023bcecb9254f8c07ddee56ac1b43a6c	k__Fungi	p__Rozellomycota	c__unidentified	o__unidentified	f__unidentified	g__unidentified	s__unidentified	0	0	0	0	0	0	0	0	0	0	0	0	0	0	0	0	0	0	0	0	0	0	0	0	0	0	0	0	0	0	0	0	0	0	0	0	0	0	0	0	0	0
02402183d28a1fb51b8ed7cceb5799ee	k__Fungi	p__unidentified	c__unidentified	o__unidentified	f__unidentified	g__unidentified	s__unidentified	0	0	0	0	0	0	0	0	0	0	0	0	0	0	0	0	0	0	0	0	0	0	0	0	0	0	0	0	0	0	0	0	0	0	0	0	0	0	0	0	0	0
024382a93cc848d62caa628acb363d10	k__Fungi	p__Chytridiomycota	c__unidentified	o__unidentified	f__unidentified	g__unidentified	s__unidentified	0	0	0	0	0	0	0	0	0	0	0	0	0	0	0	0	0	0	0	0	0	0	0	0	0	0	0	0	0	0	0	0	0	0	0	0	0	0	0	0	0	0
024d0f0451bed865202b033ad68219c9	k__Fungi	p__unidentified	c__unidentified	o__unidentified	f__unidentified	g__unidentified	s__unidentified	0	0	0	0	0	0	0	0	0	0	0	0	0	0	0	0	0	0	0	0	0	0	0	0	0	0	0	0	0	0	0	0	0	0	0	0	0	0	0	0	0	0
02553142b246e4b8207a9f836a1dd030	k__Fungi	p__Chytridiomycota	c__Lobulomycetes	o__Lobulomycetales	f__unidentified	g__unidentified	s__unidentified	0	0	0	0	0	0	0	0	0	0	0	0	0	0	0	0	0	0	0	0	0	0	0	0	0	6	0	0	0	0	0	0	0	0	0	0	0	0	0	0	0	0
0262a3bc2233247b6786f9f87b12ac16	k__Fungi	p__unidentified	c__unidentified	o__unidentified	f__unidentified	g__unidentified	s__unidentified	0	0	0	0	0	0	0	0	0	0	0	0	0	0	0	0	0	0	0	0	0	0	0	0	0	0	0	0	0	0	0	0	0	0	0	0	0	0	0	0	0	0
02646a5cea689347bbfb49798fb74361	k__Fungi	p__unidentified	c__unidentified	o__unidentified	f__unidentified	g__unidentified	s__unidentified	0	0	0	0	0	0	0	0	0	0	0	0	0	0	0	0	0	0	0	0	0	0	0	0	0	0	0	0	0	0	0	0	0	0	0	0	0	0	0	0	0	0
026b12a5696c3f3d832e7e6e43a414cb	k__Fungi	p__Chytridiomycota	c__unidentified	o__unidentified	f__unidentified	g__unidentified	s__unidentified	0	0	0	0	0	0	0	0	0	0	0	0	0	0	0	0	0	0	0	0	0	0	0	0	0	0	0	0	0	0	0	0	0	0	0	0	0	0	0	0	0	0
026fb5c76c26a27baabfa6679eb4a931	k__Fungi	p__unidentified	c__unidentified	o__unidentified	f__unidentified	g__unidentified	s__unidentified	0	0	0	0	0	0	0	0	0	0	0	0	0	0	0	0	0	0	0	0	0	0	0	0	0	0	0	0	0	0	0	0	0	0	0	0	0	0	0	0	0	0
026fed942c87e79ac97de65b92f327da	k__Fungi	p__Ascomycota	c__Sordariomycetes	o__Hypocreales	f__Nectriaceae	g__Xenoacremonium	s__Xenoacremonium_falcatum	0	0	0	52	0	0	0	0	0	0	0	0	0	0	0	0	0	0	0	0	0	0	0	0	0	0	0	0	0	0	0	0	0	0	0	0	0	0	0	0	0	0
0270e06e13ff8a08f1f83cf1b922ec52	k__Fungi	p__unidentified	c__unidentified	o__unidentified	f__unidentified	g__unidentified	s__unidentified	0	0	0	0	0	0	0	0	0	0	0	0	0	0	0	0	0	0	0	0	0	0	0	0	0	0	0	0	0	0	0	0	0	0	0	0	0	0	0	0	0	0
0273766904e22c9c5476d5842cb8d9aa	k__Fungi	p__unidentified	c__unidentified	o__unidentified	f__unidentified	g__unidentified	s__unidentified	0	0	0	0	0	0	0	0	0	0	0	0	0	0	0	0	0	0	0	0	0	0	0	0	0	0	0	0	0	0	0	0	0	0	0	0	0	0	0	0	0	0
0274e4426043cf9ac19704e5552a0c2b	k__Fungi	p__unidentified	c__unidentified	o__unidentified	f__unidentified	g__unidentified	s__unidentified	0	0	0	0	0	0	0	0	0	0	0	0	0	0	0	0	0	0	0	0	0	0	0	0	0	0	0	0	0	0	0	0	0	0	0	0	0	0	0	0	0	0
0278632964a8b1b9f34118dbb2c29aa3	k__Fungi	p__unidentified	c__unidentified	o__unidentified	f__unidentified	g__unidentified	s__unidentified	0	0	0	0	0	0	0	0	0	0	0	0	0	0	0	0	0	0	0	0	0	0	0	0	0	0	0	0	0	0	0	0	0	0	0	0	0	0	0	0	0	0
0283674f8170bc6081a7c39a3047e2bb	k__Fungi	p__unidentified	c__unidentified	o__unidentified	f__unidentified	g__unidentified	s__unidentified	0	0	0	0	0	0	0	0	0	0	0	0	0	0	0	0	0	0	0	0	0	0	0	0	0	0	0	0	0	0	0	0	0	0	0	0	0	0	0	0	0	0
0285301f25b6cfcadbba0035d5a9f60a	k__Fungi	p__Chytridiomycota	c__unidentified	o__unidentified	f__unidentified	g__unidentified	s__unidentified	0	0	0	0	0	0	0	0	0	0	0	0	0	0	0	0	0	0	0	0	0	0	0	0	0	0	0	0	0	0	0	0	0	0	0	0	0	0	0	0	0	0
02861b478d97de7d58bf8bf421bbbea7	k__Fungi	p__unidentified	c__unidentified	o__unidentified	f__unidentified	g__unidentified	s__unidentified	0	0	0	0	0	0	0	0	0	0	0	0	0	0	0	0	0	0	0	0	0	0	0	0	0	0	0	0	0	0	0	0	0	0	0	0	0	0	0	0	0	0
028b8f443c9e57b5127c40ff900cae4f	k__Fungi	p__unidentified	c__unidentified	o__unidentified	f__unidentified	g__unidentified	s__unidentified	0	0	0	0	0	0	0	0	0	0	0	0	0	0	0	0	0	0	0	0	0	0	0	0	0	0	0	0	0	0	0	0	0	0	0	0	0	0	0	0	0	0
029024f321f6b3fcbdc2e7828484071f	k__Fungi	p__Chytridiomycota	c__unidentified	o__unidentified	f__unidentified	g__unidentified	s__unidentified	0	0	0	0	0	0	0	0	0	0	0	0	0	0	0	0	0	0	0	0	0	0	0	0	0	0	0	0	0	0	0	0	0	0	0	0	0	0	0	0	0	0
0292008344eaa9213717d20a0e0986c0	k__Fungi	p__unidentified	c__unidentified	o__unidentified	f__unidentified	g__unidentified	s__unidentified	0	0	0	0	0	0	0	0	0	0	0	0	0	0	0	0	0	0	0	0	0	0	0	0	0	0	0	0	0	0	0	0	0	0	0	0	0	0	0	0	0	0
0292b66e0e12d47da09ec9065b6ac7a1	k__Fungi	p__unidentified	c__unidentified	o__unidentified	f__unidentified	g__unidentified	s__unidentified	0	0	0	0	0	0	0	0	0	0	0	0	0	0	0	0	0	0	0	0	0	0	0	0	0	0	0	0	0	0	0	0	0	0	0	0	0	0	0	0	0	0
02a1c327e1229e38358a4a56e9f3b95a	k__Fungi	p__Basidiomycota	c__unidentified	o__unidentified	f__unidentified	g__unidentified	s__unidentified	0	0	0	0	0	0	0	0	0	0	0	0	0	0	0	0	0	0	0	0	0	0	0	0	0	0	0	0	0	0	0	0	0	0	0	0	0	0	0	0	0	0
02a4790c616f36a6e63d4fb27006d26d	k__Fungi	p__unidentified	c__unidentified	o__unidentified	f__unidentified	g__unidentified	s__unidentified	0	3	0	0	0	0	0	0	0	0	0	0	0	0	0	0	0	0	0	0	0	0	0	0	0	0	0	0	0	0	0	0	0	0	0	0	0	0	0	0	0	0
02a9cac0089ac2c2b9a99780e863945d	k__Fungi	p__unidentified	c__unidentified	o__unidentified	f__unidentified	g__unidentified	s__unidentified	0	0	0	0	0	0	0	0	0	0	0	0	0	0	0	0	0	0	0	0	0	0	0	0	0	0	0	0	0	0	0	0	0	0	0	0	0	0	0	0	0	0
02aad1a3abe758ddc3afb0e018d49c60	k__Fungi	p__Ascomycota	c__unidentified	o__unidentified	f__unidentified	g__unidentified	s__unidentified	0	0	0	0	0	0	0	0	0	0	0	0	0	0	0	0	0	0	0	0	0	0	0	0	0	0	0	0	0	0	0	0	0	0	0	0	0	0	0	0	0	0
02af80bbec8c6bea4715ec5eba821b33	k__Fungi	p__Chytridiomycota	c__unidentified	o__unidentified	f__unidentified	g__unidentified	s__unidentified	0	0	0	0	0	0	0	0	0	0	0	0	0	0	0	0	0	0	0	0	0	0	0	0	0	0	0	0	0	0	0	0	0	0	0	0	0	0	0	0	0	0
02b27de1acdf0643639a3be8ec7adcab	k__Fungi	p__Ascomycota	c__Leotiomycetes	o__Helotiales	f__Hyaloscyphaceae	g__Lachnellula	s__Lachnellula_fuscosanguinea	0	0	0	0	0	0	0	0	0	0	0	0	0	0	0	0	0	0	0	0	0	17	0	0	0	0	0	0	0	0	0	0	0	0	0	0	0	0	0	0	0	0
02b32003e9e28c7219c9d2cea28ffc5e	k__Fungi	p__Chytridiomycota	c__unidentified	o__unidentified	f__unidentified	g__unidentified	s__unidentified	0	0	0	0	0	0	0	0	0	0	0	0	0	0	0	0	0	0	0	0	0	0	0	0	0	0	0	0	0	0	0	0	0	0	0	0	0	0	0	0	0	0
02b506c8f47f55982aa605652d526831	k__Fungi	p__unidentified	c__unidentified	o__unidentified	f__unidentified	g__unidentified	s__unidentified	0	0	0	0	0	0	0	0	0	0	0	0	0	0	0	0	0	0	0	0	0	0	0	0	0	0	0	0	0	0	0	0	0	0	0	0	0	0	0	0	0	0
02c0504f1a8053de302a31f292235206	k__Fungi	p__unidentified	c__unidentified	o__unidentified	f__unidentified	g__unidentified	s__unidentified	0	0	0	0	0	0	0	0	0	0	92	0	0	0	0	0	0	0	0	0	0	0	0	0	0	0	0	0	0	0	0	0	0	0	0	0	0	0	0	0	0	0
02c0f72bd1f687f314204afd57041f68	k__Fungi	p__Chytridiomycota	c__unidentified	o__unidentified	f__unidentified	g__unidentified	s__unidentified	0	0	0	0	0	0	0	0	0	0	0	0	0	0	0	0	0	0	0	0	0	0	0	0	0	0	0	0	0	0	0	0	0	0	0	0	0	0	0	0	0	0
02c3492d41d876691456cccc0a434f5b	k__Fungi	p__Rozellomycota	c__unidentified	o__unidentified	f__unidentified	g__unidentified	s__unidentified	0	0	0	0	0	0	0	0	0	0	0	0	0	0	0	0	0	0	0	0	0	0	0	0	0	0	0	0	0	0	0	0	0	0	0	0	0	0	0	0	0	0
02c6240fbb3391bdf6a1bdf178273a80	k__Fungi	p__unidentified	c__unidentified	o__unidentified	f__unidentified	g__unidentified	s__unidentified	0	0	0	0	0	0	0	0	0	0	0	0	0	0	0	0	0	0	0	0	0	0	0	0	0	0	0	0	0	0	0	0	0	0	0	0	0	0	0	0	0	0
02c6cca6ba16f7b5216fd10937692256	k__Fungi	p__unidentified	c__unidentified	o__unidentified	f__unidentified	g__unidentified	s__unidentified	0	0	0	0	0	0	0	0	0	0	0	0	0	0	0	0	0	0	0	0	0	0	0	0	0	0	0	0	0	0	0	0	0	0	0	0	0	0	0	0	0	0
02cba2cfabecac42d1a8c57664875eb4	k__Fungi	p__unidentified	c__unidentified	o__unidentified	f__unidentified	g__unidentified	s__unidentified	0	0	0	0	0	0	0	0	0	0	0	0	0	0	0	0	0	0	0	0	0	0	0	0	0	0	0	0	0	0	0	0	0	0	0	0	0	0	0	0	0	0
02cee988b5f71ed1ae899db70874198d	k__Fungi	p__unidentified	c__unidentified	o__unidentified	f__unidentified	g__unidentified	s__unidentified	0	0	0	0	0	0	0	0	0	0	0	0	0	0	0	0	0	0	0	0	0	0	0	0	0	0	858	0	0	0	0	0	0	0	0	0	0	0	0	0	0	0
02cf5c4e0c0d61a528114c311afed94c	k__Fungi	p__Ascomycota	c__Eurotiomycetes	o__Chaetothyriales	f__Herpotrichiellaceae	g__Rhinocladiella	s__unidentified	0	0	0	0	0	0	0	0	0	0	0	0	0	0	0	0	0	0	0	0	0	0	0	0	0	0	0	0	0	0	0	0	0	0	0	0	0	0	0	0	0	0
02d1892b0a625f99b49d5d4e3a434fd4	k__Fungi	p__unidentified	c__unidentified	o__unidentified	f__unidentified	g__unidentified	s__unidentified	0	0	0	0	0	0	0	0	0	0	0	0	0	0	0	0	0	0	0	0	0	0	0	0	0	0	0	0	0	0	0	0	0	0	0	0	0	0	0	0	0	0
02d84e069bb93f5e29c288439223ef43	k__Fungi	p__unidentified	c__unidentified	o__unidentified	f__unidentified	g__unidentified	s__unidentified	0	0	0	0	0	0	0	0	0	0	0	0	0	0	0	0	0	0	0	0	0	0	0	0	0	0	0	0	0	0	0	0	0	0	0	0	0	0	0	0	0	0
02da133b1ca27196ba521118d262463d	k__Fungi	p__Chytridiomycota	c__unidentified	o__unidentified	f__unidentified	g__unidentified	s__unidentified	0	0	0	0	0	0	0	0	0	0	0	0	0	0	0	0	0	0	0	0	0	0	0	0	0	0	0	0	0	0	0	0	0	0	0	0	0	0	0	0	0	0
02e0d1c3cd68c71a96744e1a82338fcb	k__Fungi	p__unidentified	c__unidentified	o__unidentified	f__unidentified	g__unidentified	s__unidentified	0	0	0	0	0	0	0	7	0	0	0	0	0	0	0	0	0	0	0	0	0	0	0	0	0	0	0	0	0	0	0	0	0	0	0	0	0	0	0	0	0	0
02e12a61500233917e2db45747dc2bcd	k__Fungi	p__unidentified	c__unidentified	o__unidentified	f__unidentified	g__unidentified	s__unidentified	0	0	0	0	0	0	0	0	0	0	0	0	0	0	0	0	0	0	0	0	0	0	0	0	0	0	0	0	0	0	0	0	0	0	0	0	0	0	0	0	0	0
02e4bf9ec0669e6a89a4ce53a01504ed	k__Fungi	p__unidentified	c__unidentified	o__unidentified	f__unidentified	g__unidentified	s__unidentified	0	0	0	0	0	0	0	0	0	0	0	0	0	0	0	0	0	0	0	0	0	0	0	0	0	0	0	0	0	21	0	0	0	0	0	0	0	0	0	0	0	0
02e920bf0e20f5e060b790d8a2973a85	k__Fungi	p__unidentified	c__unidentified	o__unidentified	f__unidentified	g__unidentified	s__unidentified	0	0	0	0	0	0	0	0	0	0	0	0	0	0	0	0	0	0	0	0	0	0	0	0	0	0	0	0	0	0	0	0	0	0	0	0	0	0	0	0	0	0
02f0beadefc89cf92875a968b2e7556a	k__Fungi	p__unidentified	c__unidentified	o__unidentified	f__unidentified	g__unidentified	s__unidentified	0	0	0	0	0	0	0	0	0	0	0	0	0	0	0	0	0	0	0	0	0	0	0	0	0	0	0	0	0	0	0	0	0	0	0	0	0	0	0	0	0	0
02f4ae9f5bd4a9dceb4237b850305468	k__Fungi	p__unidentified	c__unidentified	o__unidentified	f__unidentified	g__unidentified	s__unidentified	0	0	0	0	0	0	0	0	0	0	0	0	0	0	0	0	0	0	0	11	0	0	0	0	0	0	0	0	0	0	0	0	0	0	0	0	0	0	0	0	0	0
02f84c56356c4d80a6d73ff20adab9bf	k__Fungi	p__Rozellomycota	c__unidentified	o__unidentified	f__unidentified	g__unidentified	s__unidentified	0	0	0	0	0	0	0	0	0	0	0	0	0	0	0	0	0	0	0	0	0	0	0	0	0	0	0	0	0	0	0	0	0	0	0	0	0	0	0	0	0	0
02fb682d8d9ec157bde29199906c5bb5	k__Fungi	p__Ascomycota	c__Dothideomycetes	o__Capnodiales	f__Cladosporiaceae	g__Cladosporium	s__unidentified	0	0	0	528	0	0	0	0	0	0	0	0	0	0	0	0	0	0	0	0	0	0	0	0	0	0	0	0	0	0	0	0	0	0	0	0	0	0	0	0	0	0
02fd63d7c6e83dc7b7bebcc66405909f	k__Fungi	p__unidentified	c__unidentified	o__unidentified	f__unidentified	g__unidentified	s__unidentified	0	0	0	0	0	0	0	0	0	0	0	0	0	0	0	0	0	0	0	0	0	0	0	0	0	0	0	0	0	0	0	0	0	0	0	0	0	0	0	0	0	0
02ff37c03a1af75db6d35357fc578ff0	k__Fungi	p__unidentified	c__unidentified	o__unidentified	f__unidentified	g__unidentified	s__unidentified	0	0	0	0	0	0	0	0	0	0	0	0	0	0	0	0	0	0	0	0	0	0	0	0	0	0	0	0	0	0	0	0	0	0	0	0	0	0	0	0	0	0
03002de55e73b56530d985acfb0d8009	k__Fungi	p__unidentified	c__unidentified	o__unidentified	f__unidentified	g__unidentified	s__unidentified	0	0	0	0	0	0	0	0	0	0	0	0	0	0	0	0	0	0	0	0	0	0	0	0	0	0	0	0	0	0	0	0	0	0	0	0	0	0	0	0	0	0
0311a7d597de032f6d995d688328ebc8	k__Fungi	p__unidentified	c__unidentified	o__unidentified	f__unidentified	g__unidentified	s__unidentified	0	0	0	0	0	0	0	0	0	0	0	0	0	0	0	0	0	0	0	0	0	0	0	0	0	0	0	0	0	0	0	0	0	0	0	0	0	0	0	0	0	0
0313522d8dce555a3f8d09147d3219fd	k__Fungi	p__unidentified	c__unidentified	o__unidentified	f__unidentified	g__unidentified	s__unidentified	0	0	0	0	0	0	0	0	0	0	0	0	41	0	0	0	0	0	0	5	77	0	0	0	0	0	0	0	0	0	0	0	0	0	0	0	0	0	0	0	0	0
0316af1a7dcf241bc9567aa9adf31e9c	k__Fungi	p__unidentified	c__unidentified	o__unidentified	f__unidentified	g__unidentified	s__unidentified	0	0	0	0	0	0	0	0	0	0	0	0	0	0	0	0	0	0	0	0	0	0	0	0	0	0	0	0	0	0	0	0	0	0	0	0	0	0	0	0	0	0
0317865b0db9ff3bc15e737c06514bd5	k__Fungi	p__unidentified	c__unidentified	o__unidentified	f__unidentified	g__unidentified	s__unidentified	0	0	0	0	0	0	0	0	0	0	0	0	0	0	0	0	0	0	0	0	0	0	0	0	0	0	0	0	0	0	0	0	0	0	0	0	0	0	0	0	0	0
031bfbeda2e3bfa8d491165bc98b715b	k__Fungi	p__unidentified	c__unidentified	o__unidentified	f__unidentified	g__unidentified	s__unidentified	0	0	0	0	0	0	0	0	0	0	0	0	0	0	0	0	0	0	0	0	0	0	0	0	0	0	0	0	0	0	0	0	0	0	0	0	0	0	0	0	0	0
0321a89a558ba336bfbce2e211034eeb	k__Fungi	p__unidentified	c__unidentified	o__unidentified	f__unidentified	g__unidentified	s__unidentified	0	0	0	0	16	0	0	0	65	0	0	62	0	0	0	0	0	0	0	0	0	0	0	0	0	0	0	0	0	0	0	0	159	0	0	0	20	0	0	0	17	0
032c92a8fbbb4ea6c807bd285a84ba3e	k__Fungi	p__unidentified	c__unidentified	o__unidentified	f__unidentified	g__unidentified	s__unidentified	0	0	0	0	0	0	0	0	0	0	0	0	0	0	0	0	0	0	0	0	0	0	0	0	0	0	0	0	0	0	0	0	0	0	0	0	0	0	0	0	0	0
032f9b986d33250f1211d65b3f47c09b	k__Fungi	p__unidentified	c__unidentified	o__unidentified	f__unidentified	g__unidentified	s__unidentified	0	0	0	0	0	0	0	0	0	0	0	0	0	0	0	0	0	0	0	0	0	0	0	0	0	0	0	0	0	0	0	0	0	0	0	0	0	0	0	0	0	0
03334c3fbba71b5ef526ac8d8924b295	k__Fungi	p__unidentified	c__unidentified	o__unidentified	f__unidentified	g__unidentified	s__unidentified	0	0	0	0	0	0	0	0	0	0	0	0	0	0	0	0	0	0	0	0	0	0	0	0	0	0	0	0	0	0	0	0	0	0	0	0	0	0	0	0	0	0
0333a2ae020b42766df0ed56442b37f0	k__Fungi	p__unidentified	c__unidentified	o__unidentified	f__unidentified	g__unidentified	s__unidentified	0	0	0	0	0	0	0	0	0	0	0	0	0	0	0	0	0	0	0	0	0	0	0	0	0	0	27	0	0	0	0	0	0	0	0	0	0	0	0	0	0	0
03376dfc64c8b4b837591b9b3a0f91d8	k__Fungi	p__unidentified	c__unidentified	o__unidentified	f__unidentified	g__unidentified	s__unidentified	0	0	0	0	0	0	0	0	0	0	0	0	0	0	0	0	0	0	0	0	0	0	0	0	0	0	0	0	0	0	0	0	0	0	0	0	0	0	0	0	0	0
0341cedd541be54724ecacf57a9231f2	k__Fungi	p__unidentified	c__unidentified	o__unidentified	f__unidentified	g__unidentified	s__unidentified	0	0	0	0	0	0	0	0	0	0	0	0	0	0	0	0	0	0	0	0	0	0	0	0	0	0	0	0	0	0	0	0	0	0	0	0	0	0	0	0	0	0
0343dfa8940f92dea85bf9c446d2628d	k__Fungi	p__unidentified	c__unidentified	o__unidentified	f__unidentified	g__unidentified	s__unidentified	0	4	0	0	0	0	0	0	0	0	0	0	0	0	0	0	0	0	0	0	0	0	0	0	0	0	0	0	0	0	0	0	0	0	0	0	0	0	0	0	0	0
034457cc2978e1e4bd63bf85636e1c51	k__Fungi	p__Ascomycota	c__Eurotiomycetes	o__Eurotiales	f__Aspergillaceae	g__Aspergillus	s__unidentified	0	0	0	0	0	0	0	0	0	0	0	0	0	0	0	0	0	0	0	0	0	0	0	0	0	0	0	0	0	0	0	0	0	0	0	0	0	539	0	0	0	0
0345e6dae8988a4f420f03f8fee98a64	k__Fungi	p__unidentified	c__unidentified	o__unidentified	f__unidentified	g__unidentified	s__unidentified	0	0	0	0	0	0	0	0	0	0	0	0	0	0	0	0	0	0	0	0	0	0	0	0	0	0	0	0	0	0	0	0	0	0	0	0	0	0	0	0	0	0
0346858f01c25c9a5fa89a7bc7f1fdf8	k__Fungi	p__Ascomycota	c__unidentified	o__unidentified	f__unidentified	g__unidentified	s__unidentified	0	0	0	0	0	0	0	0	0	0	0	0	0	0	0	0	0	0	0	0	0	0	0	0	0	0	0	0	0	0	0	0	0	0	0	0	0	0	0	0	0	0
034749d2df608ddc7acbf2b77e983d9d	k__Fungi	p__Ascomycota	c__Sordariomycetes	o__Hypocreales	f__Nectriaceae	g__Xenoacremonium	s__Xenoacremonium_falcatum	0	0	0	0	0	0	0	0	0	0	0	0	0	0	0	0	0	0	0	0	0	0	0	0	0	0	0	0	0	0	0	0	0	0	0	0	0	0	0	0	0	0
034e5412fa29b935d5c004233ade963d	k__Fungi	p__unidentified	c__unidentified	o__unidentified	f__unidentified	g__unidentified	s__unidentified	0	0	0	0	0	0	0	0	0	0	0	0	0	0	0	0	0	0	0	0	0	0	0	0	0	0	0	0	0	0	0	0	0	0	0	0	0	0	0	0	0	0
034ed72ca2887284e6c34c946901d14d	k__Fungi	p__unidentified	c__unidentified	o__unidentified	f__unidentified	g__unidentified	s__unidentified	0	0	0	0	0	0	0	0	0	0	0	0	0	0	0	0	0	0	0	0	0	0	0	0	0	0	0	0	0	0	0	0	0	0	0	0	0	0	0	0	0	0
034ee97972f9d4ede6cbf9362cb7f8eb	k__Fungi	p__unidentified	c__unidentified	o__unidentified	f__unidentified	g__unidentified	s__unidentified	0	0	47	0	0	0	0	0	0	0	0	0	0	0	0	0	0	0	0	0	0	0	0	0	0	0	0	0	0	0	0	0	0	0	0	0	0	0	0	174	0	0
0351b7070a3f2e83549bd913794da89a	k__Fungi	p__Ascomycota	c__Dothideomycetes	o__Pleosporales	f__Didymellaceae	g__unidentified	s__unidentified	0	0	0	0	0	0	0	0	0	0	0	0	0	0	0	0	0	0	0	0	0	0	0	13649	0	0	0	0	0	0	0	0	0	0	0	0	0	0	0	0	0	0
03556f0c1e3ee372c2ff06671170fc1b	k__Fungi	p__unidentified	c__unidentified	o__unidentified	f__unidentified	g__unidentified	s__unidentified	0	0	0	0	0	0	0	0	0	0	0	0	0	0	0	0	0	0	0	0	0	0	0	0	0	0	0	0	0	0	0	0	0	4	0	0	0	0	0	0	0	0
035c15678e137fbe649df5486a1552ef	k__Fungi	p__unidentified	c__unidentified	o__unidentified	f__unidentified	g__unidentified	s__unidentified	0	0	0	0	0	0	0	0	0	0	0	0	0	0	0	0	0	0	0	0	0	0	0	0	0	0	0	0	0	0	0	0	0	0	0	0	0	0	0	0	0	0
03600871c45ea07a8f2d0c14d89070b1	k__Fungi	p__Chytridiomycota	c__unidentified	o__unidentified	f__unidentified	g__unidentified	s__unidentified	0	0	0	0	0	0	0	0	0	0	0	0	0	0	0	0	0	0	0	0	137	0	0	0	0	0	0	0	0	0	0	0	0	0	0	0	0	0	0	0	0	0
0361cf471810739441c202a098761bb4	k__Fungi	p__unidentified	c__unidentified	o__unidentified	f__unidentified	g__unidentified	s__unidentified	0	0	0	0	0	0	0	0	0	0	0	0	0	0	0	0	0	0	0	0	0	0	0	0	0	0	0	0	0	0	0	0	0	0	0	0	0	0	0	0	0	0
0361eb2de408c0ff7a415240bf5d9aab	k__Fungi	p__unidentified	c__unidentified	o__unidentified	f__unidentified	g__unidentified	s__unidentified	0	0	0	0	0	0	0	0	0	0	0	0	0	0	0	0	0	0	0	0	0	0	0	0	0	0	0	0	0	0	0	0	0	0	0	0	0	0	0	0	0	0
0365f659158ff976feaceeb43984a2d6	k__Fungi	p__unidentified	c__unidentified	o__unidentified	f__unidentified	g__unidentified	s__unidentified	0	0	0	0	0	0	0	0	0	0	0	0	0	0	0	0	0	0	0	0	0	0	0	0	0	0	0	0	0	0	0	0	0	0	0	0	0	0	0	0	0	0
03691b78064d6e0790ebbf4be44cc4ba	k__Fungi	p__unidentified	c__unidentified	o__unidentified	f__unidentified	g__unidentified	s__unidentified	0	0	0	0	0	0	0	0	0	0	0	0	0	0	0	0	0	0	0	0	0	0	0	0	0	0	0	0	0	0	0	0	0	0	0	0	0	0	0	0	0	0
0369b7cab7377afdd2cb9b427fdb7b40	k__Fungi	p__unidentified	c__unidentified	o__unidentified	f__unidentified	g__unidentified	s__unidentified	0	0	0	0	0	0	0	0	0	0	0	0	0	0	0	0	0	0	0	0	0	0	0	0	0	0	0	48	0	0	0	0	0	0	0	0	0	0	0	0	0	0
036b792be386795819d2e6c0322aa9c5	k__Fungi	p__unidentified	c__unidentified	o__unidentified	f__unidentified	g__unidentified	s__unidentified	0	0	0	0	0	0	0	0	0	0	0	0	0	0	0	0	0	0	0	0	0	0	0	0	0	0	0	0	0	0	0	0	0	0	0	0	0	0	0	0	0	0
036da5072f9d82d70b238c44486dd672	k__Fungi	p__unidentified	c__unidentified	o__unidentified	f__unidentified	g__unidentified	s__unidentified	0	0	0	0	0	0	0	0	0	0	0	0	0	0	0	0	0	0	0	0	0	0	0	0	0	0	0	2	0	0	0	0	0	0	0	0	0	0	0	0	0	0
037485e876f0a8634ef3b816de768d32	k__Fungi	p__Ascomycota	c__Orbiliomycetes	o__Orbiliales	f__unidentified	g__unidentified	s__unidentified	0	0	0	0	0	0	0	0	0	0	0	0	0	0	0	0	0	0	0	0	0	0	0	0	0	0	0	0	0	0	0	0	0	0	0	0	0	0	0	0	0	0
0379adaba1e91658b1e88bec0bfb5b53	k__Fungi	p__unidentified	c__unidentified	o__unidentified	f__unidentified	g__unidentified	s__unidentified	0	0	0	0	0	0	0	0	0	0	0	0	0	0	0	0	0	0	0	0	0	0	0	0	0	0	0	0	0	0	0	0	0	0	0	0	0	0	0	0	0	0
037d56d1f5c03a397509f5658c3361c4	k__Fungi	p__unidentified	c__unidentified	o__unidentified	f__unidentified	g__unidentified	s__unidentified	0	0	0	0	0	0	0	0	0	0	0	0	0	0	0	0	0	0	0	0	0	0	0	0	0	0	0	0	0	0	0	0	0	0	0	0	0	0	0	0	0	0
0380d8fda4292f20bdca3c087f608797	k__Fungi	p__Ascomycota	c__Sordariomycetes	o__Hypocreales	f__unidentified	g__unidentified	s__unidentified	0	0	0	0	0	0	0	0	0	0	0	0	0	0	0	0	0	0	0	0	0	0	0	0	0	0	0	0	0	0	0	0	0	0	0	0	0	0	0	0	0	0
038124c9756e272abc20ab60e55312c8	k__Fungi	p__unidentified	c__unidentified	o__unidentified	f__unidentified	g__unidentified	s__unidentified	0	0	0	0	0	0	0	0	0	0	0	0	0	0	0	0	0	0	0	0	0	0	0	0	0	0	0	0	0	0	0	0	0	0	0	0	0	0	0	0	0	0
0386ca925994f115e69dc0d0e9b3d410	k__Fungi	p__Chytridiomycota	c__unidentified	o__unidentified	f__unidentified	g__unidentified	s__unidentified	0	0	0	0	0	0	0	0	0	0	0	0	0	0	0	0	0	0	0	0	0	0	0	0	0	0	0	0	0	0	0	0	0	0	0	0	0	0	0	0	0	0
038c28d41c5fdcc0d118a6e89221f559	k__Fungi	p__unidentified	c__unidentified	o__unidentified	f__unidentified	g__unidentified	s__unidentified	0	0	0	0	0	0	0	0	0	0	0	0	0	0	0	0	0	0	0	0	0	0	0	0	0	0	0	0	0	0	0	0	0	0	0	0	0	0	0	0	0	0
038d5151b49d02a630e33e932d3745dc	k__Fungi	p__unidentified	c__unidentified	o__unidentified	f__unidentified	g__unidentified	s__unidentified	0	0	0	0	0	0	0	0	0	0	0	0	0	0	0	0	0	0	0	0	0	0	0	0	0	0	0	0	0	0	0	0	0	0	0	0	0	0	0	0	0	0
03938335aff628368f8a59c148d094b0	k__Fungi	p__Ascomycota	c__Dothideomycetes	o__Pleosporales	f__Phaeosphaeriaceae	g__Juncaceicola	s__unidentified	0	0	0	0	0	0	0	0	0	0	0	0	0	0	0	0	0	0	0	0	0	0	0	0	0	0	0	0	0	0	0	0	0	0	0	0	0	0	0	0	0	0
03939d461780411f2983e19ba02daac7	k__Fungi	p__unidentified	c__unidentified	o__unidentified	f__unidentified	g__unidentified	s__unidentified	0	0	0	0	0	0	0	0	0	0	0	0	0	0	0	0	0	0	0	0	0	0	0	0	0	0	0	0	0	0	0	0	0	0	0	0	0	0	0	0	0	0
03970bb90d9ba4e608476e0650a7b661	k__Fungi	p__unidentified	c__unidentified	o__unidentified	f__unidentified	g__unidentified	s__unidentified	0	0	0	0	0	0	0	0	0	0	0	0	0	0	0	0	0	0	0	0	0	0	0	0	0	0	0	0	0	0	0	0	0	0	0	0	0	0	0	0	0	0
039ba062236c8c3f20487d90cd11ff74	k__Fungi	p__unidentified	c__unidentified	o__unidentified	f__unidentified	g__unidentified	s__unidentified	0	0	0	0	0	0	0	0	0	0	0	0	0	0	0	0	0	0	0	0	0	0	0	0	0	0	0	0	0	0	0	0	0	0	0	0	0	0	0	0	0	0
03a0e4c824f5b0c4f41df84c18f3d59a	k__Fungi	p__unidentified	c__unidentified	o__unidentified	f__unidentified	g__unidentified	s__unidentified	0	0	0	0	0	0	0	0	0	0	0	0	0	0	0	0	0	0	0	0	0	0	0	0	0	0	0	0	0	0	0	0	0	0	0	0	0	0	0	0	0	0
03a9b435d8cb02bd3076ed7c19cdb882	k__Fungi	p__Basidiomycota	c__Agaricomycetes	o__Agaricales	f__Schizophyllaceae	g__Schizophyllum	s__unidentified	0	0	0	0	0	0	0	0	0	0	0	0	0	0	0	0	0	0	0	0	0	0	0	0	0	0	0	0	0	0	0	0	0	0	0	0	0	0	0	0	0	0
03acc494542399418d5e72d1ac085633	k__Fungi	p__unidentified	c__unidentified	o__unidentified	f__unidentified	g__unidentified	s__unidentified	0	0	0	0	0	0	0	0	0	0	0	0	0	0	0	0	0	0	0	0	0	0	0	0	0	0	0	0	0	0	0	0	0	0	0	0	0	0	0	0	0	0
03ad0835d031336311b9f123a0b2a076	k__Fungi	p__unidentified	c__unidentified	o__unidentified	f__unidentified	g__unidentified	s__unidentified	0	0	0	0	0	0	0	0	0	0	0	0	0	0	0	0	0	0	0	0	0	0	0	0	0	0	0	0	0	0	5	0	0	0	0	0	0	0	0	0	0	0
03af2464af8e1b0e75c56fc1a21ed8fe	k__Fungi	p__Mortierellomycota	c__Mortierellomycetes	o__Mortierellales	f__Mortierellaceae	g__Mortierella	s__Mortierella_elongatula	0	0	0	0	0	0	0	0	0	0	0	0	0	0	0	0	0	0	0	0	0	0	0	0	0	0	0	0	0	0	0	0	0	0	0	0	0	0	0	0	0	0
03afbfe3b2ee79d3fa8004afe647716c	k__Fungi	p__unidentified	c__unidentified	o__unidentified	f__unidentified	g__unidentified	s__unidentified	0	0	0	0	0	0	0	0	0	0	0	0	0	0	0	0	0	0	0	0	0	0	0	0	0	0	0	0	0	0	0	0	0	0	0	0	0	0	0	0	0	0
03b0ce09397054770e0e6dc9c7025e7b	k__Fungi	p__Ascomycota	c__Sordariomycetes	o__Hypocreales	f__Nectriaceae	g__Xenoacremonium	s__Xenoacremonium_falcatum	0	0	0	0	0	0	0	0	0	0	0	0	0	0	0	0	0	0	0	0	0	0	0	0	0	0	0	0	0	0	0	0	0	0	0	0	0	0	0	0	0	0
03b19eddf58aad72960a8329eeeb33c4	k__Fungi	p__unidentified	c__unidentified	o__unidentified	f__unidentified	g__unidentified	s__unidentified	0	0	0	0	0	0	0	0	0	0	0	0	0	0	0	0	0	0	0	0	0	0	0	0	0	0	0	0	0	0	0	0	0	0	0	0	0	0	0	0	0	0
03b42160456dfd6a7ac91ca13600b846	k__Fungi	p__Ascomycota	c__Leotiomycetes	o__Helotiales	f__Leotiaceae	g__Gorgomyces	s__unidentified	0	0	0	0	0	0	0	0	0	0	0	0	0	0	205	0	0	0	0	0	0	0	0	0	0	0	0	0	0	0	0	0	0	0	0	0	0	0	0	0	0	0
03bae5856a23ad80c228b32d15197649	k__Fungi	p__unidentified	c__unidentified	o__unidentified	f__unidentified	g__unidentified	s__unidentified	0	0	0	0	0	0	0	0	0	0	0	0	0	0	0	0	0	0	0	0	0	0	0	0	0	0	0	0	0	0	0	0	0	0	0	0	0	0	0	0	0	0
03c4cd71b39533eedf9bb7fb01f1a627	k__Fungi	p__unidentified	c__unidentified	o__unidentified	f__unidentified	g__unidentified	s__unidentified	0	0	0	0	0	0	0	0	0	0	0	17	0	0	0	0	0	0	0	0	0	0	0	0	0	0	0	0	0	0	0	0	0	0	0	0	0	0	0	0	0	0
03cfc8c8e6e41c68a310845d8a6260b4	k__Fungi	p__unidentified	c__unidentified	o__unidentified	f__unidentified	g__unidentified	s__unidentified	0	0	0	0	0	0	0	0	0	0	0	0	0	0	0	0	0	0	0	0	0	0	0	0	0	0	0	0	0	0	0	0	0	0	0	0	0	0	0	0	0	0
03d15a674be83501fd643d0f5e1a7725	k__Fungi	p__unidentified	c__unidentified	o__unidentified	f__unidentified	g__unidentified	s__unidentified	0	0	0	0	0	0	0	0	0	0	0	0	0	0	0	0	0	0	0	0	0	0	0	0	0	0	218	0	0	0	0	0	0	0	0	0	0	0	0	0	0	0
03d1cf9b93ef0090a1e88260dfa6ceea	k__Fungi	p__unidentified	c__unidentified	o__unidentified	f__unidentified	g__unidentified	s__unidentified	0	0	0	0	0	0	0	0	0	0	0	0	0	0	0	0	0	0	0	0	0	0	0	0	0	0	0	0	0	0	0	0	0	0	0	0	0	0	0	0	0	0
03d25ca5264f4a4face47023b3547038	k__Fungi	p__unidentified	c__unidentified	o__unidentified	f__unidentified	g__unidentified	s__unidentified	0	0	0	0	0	0	0	0	0	0	0	0	0	0	0	0	0	0	0	0	0	0	0	0	0	0	0	0	0	0	0	0	0	0	0	0	0	0	0	0	0	0
03d89cd27344d12f1393443041bb2689	k__Fungi	p__unidentified	c__unidentified	o__unidentified	f__unidentified	g__unidentified	s__unidentified	0	0	0	0	0	0	0	0	0	0	0	0	0	0	0	0	0	0	0	0	0	0	0	0	0	0	0	0	0	0	0	0	0	0	0	0	0	0	0	0	0	0
03d9f73fd463674a84141e1f875edffc	k__Fungi	p__Ascomycota	c__Leotiomycetes	o__Helotiales	f__unidentified	g__unidentified	s__unidentified	0	0	0	0	0	0	0	0	0	0	0	0	0	0	0	0	0	0	0	0	0	0	0	0	0	0	0	0	0	0	0	0	0	0	0	0	0	0	0	0	0	0
03ea1083530398d0c9e9a0e6d04c3487	k__Fungi	p__Ascomycota	c__Leotiomycetes	o__unidentified	f__unidentified	g__unidentified	s__unidentified	0	0	0	0	0	0	0	0	0	0	0	0	0	0	0	0	0	0	0	0	0	0	0	0	0	0	0	0	0	0	0	0	0	0	0	0	0	0	0	0	0	0
040198ad9a709200b39f4826c0a0ac9f	k__Fungi	p__unidentified	c__unidentified	o__unidentified	f__unidentified	g__unidentified	s__unidentified	0	0	0	0	0	0	0	0	0	0	0	0	0	0	0	0	0	0	0	0	0	0	0	0	0	0	0	0	0	0	0	0	0	0	0	0	0	0	0	0	0	0
040e43551576adf30671ea9c962ecfd5	k__Fungi	p__unidentified	c__unidentified	o__unidentified	f__unidentified	g__unidentified	s__unidentified	0	0	0	0	0	0	0	0	0	0	0	0	0	0	0	0	0	0	0	0	0	0	0	0	0	0	0	0	0	0	0	0	0	0	0	0	0	0	0	0	0	0
041082e4cd8642cee1f62cdd2a55a085	k__Fungi	p__unidentified	c__unidentified	o__unidentified	f__unidentified	g__unidentified	s__unidentified	0	0	0	0	0	0	0	0	0	0	0	0	0	0	0	0	0	0	0	0	0	0	0	0	0	0	0	0	0	0	0	0	0	0	0	0	0	0	0	0	0	0
04109eaefe9ba13e6fb908d07f057e96	k__Fungi	p__unidentified	c__unidentified	o__unidentified	f__unidentified	g__unidentified	s__unidentified	0	0	0	0	0	0	0	0	0	0	0	0	0	0	0	0	0	0	0	0	0	0	0	0	0	0	0	0	0	0	0	0	0	0	0	0	0	0	0	0	0	0
04135b1bb9f5aca503a90c07612f12f6	k__Fungi	p__Monoblepharomycota	c__Monoblepharidomycetes	o__Monoblepharidales	f__unidentified	g__unidentified	s__unidentified	0	0	0	0	0	0	0	0	0	0	0	0	0	0	0	0	0	0	0	0	0	0	0	0	0	0	0	0	0	0	0	0	0	0	0	0	0	0	0	0	0	0
0418253bda8a90d8b4fc3b62cefd65f7	k__Fungi	p__Ascomycota	c__Leotiomycetes	o__Thelebolales	f__Pseudeurotiaceae	g__unidentified	s__unidentified	0	0	0	0	0	0	0	24	0	0	0	0	0	0	0	0	0	0	0	0	0	0	0	0	0	0	0	0	0	0	0	0	0	0	0	0	0	0	0	0	0	0
041c2d4a1de6bacaa95a58873db66683	k__Fungi	p__Rozellomycota	c__unidentified	o__unidentified	f__unidentified	g__unidentified	s__unidentified	0	0	0	0	0	0	0	0	0	0	0	0	0	0	0	0	0	0	0	0	0	0	0	0	0	0	0	0	0	0	0	0	0	0	0	0	0	0	0	0	0	0
041cce414d5481e62446f7fa1c918793	k__Fungi	p__Chytridiomycota	c__unidentified	o__unidentified	f__unidentified	g__unidentified	s__unidentified	0	0	0	0	0	0	0	0	0	0	0	0	0	0	0	0	0	0	0	4	0	0	0	0	0	0	0	0	0	0	0	0	0	0	0	0	0	0	0	0	0	0
041e4da515f4a76a819fd00e50a79497	k__Fungi	p__unidentified	c__unidentified	o__unidentified	f__unidentified	g__unidentified	s__unidentified	0	0	0	0	0	0	0	0	0	0	0	0	0	0	0	0	0	0	0	0	0	0	0	0	0	0	0	0	0	0	0	0	0	0	0	0	0	0	0	0	0	0
04201bb61252cbbf03247fd08cbe4cfa	k__Fungi	p__unidentified	c__unidentified	o__unidentified	f__unidentified	g__unidentified	s__unidentified	0	0	0	0	0	0	0	0	0	0	0	0	0	0	0	0	0	0	0	0	0	0	0	0	0	0	0	0	0	0	0	0	0	0	0	0	0	0	0	0	0	0
0421f344a5f88f006900bd6af8654619	k__Fungi	p__unidentified	c__unidentified	o__unidentified	f__unidentified	g__unidentified	s__unidentified	0	0	0	0	0	0	0	0	0	0	0	0	0	0	0	0	0	0	0	0	0	0	0	0	0	0	0	0	0	0	0	0	0	0	0	0	0	0	0	0	0	0
04248d659c92f6b67b1f558aa23164ca	k__Fungi	p__unidentified	c__unidentified	o__unidentified	f__unidentified	g__unidentified	s__unidentified	0	0	0	0	0	0	0	0	0	0	0	0	0	0	0	0	0	0	0	0	0	0	0	0	0	0	0	0	0	0	0	0	0	0	0	0	0	0	0	0	0	0
04250f0472d7fcbdeeeb19797e4a8081	k__Fungi	p__unidentified	c__unidentified	o__unidentified	f__unidentified	g__unidentified	s__unidentified	0	0	0	0	0	0	0	0	0	0	0	0	0	0	0	0	0	0	0	0	0	0	0	0	0	0	0	0	0	0	0	0	0	0	0	0	0	0	0	0	0	0
042602076868b086015b62113f83f859	k__Fungi	p__Basidiomycota	c__Agaricomycetes	o__Boletales	f__Sclerodermataceae	g__Scleroderma	s__Scleroderma_yunnanense	0	0	0	0	0	0	0	0	0	0	0	0	0	0	0	0	0	0	0	0	0	0	0	0	0	0	0	0	0	0	0	0	0	0	0	0	0	0	0	0	0	0
0427b61a93eb736cd171c645d778b442	k__Fungi	p__unidentified	c__unidentified	o__unidentified	f__unidentified	g__unidentified	s__unidentified	0	0	0	0	0	0	0	0	0	0	0	0	0	2	0	0	0	0	0	0	0	0	0	0	0	0	0	0	0	0	0	0	0	0	0	0	0	0	0	0	0	0
042a33b000ce5ce1e0bdaa9e509c0589	k__Fungi	p__Ascomycota	c__Leotiomycetes	o__Thelebolales	f__Pseudeurotiaceae	g__Pseudogymnoascus	s__Pseudogymnoascus_roseus	0	0	0	0	0	0	0	0	0	0	0	0	0	0	0	0	0	0	0	0	0	0	0	0	0	0	0	0	0	0	0	0	0	0	0	0	0	0	0	0	0	0
042c73e1f8a60dcb785215b1c073b2c8	k__Fungi	p__Ascomycota	c__Sordariomycetes	o__Hypocreales	f__Nectriaceae	g__Xenoacremonium	s__Xenoacremonium_falcatum	0	0	0	123	0	0	0	0	0	0	0	0	0	0	0	0	0	0	0	0	0	0	0	0	0	0	0	0	0	0	0	0	0	0	0	0	0	0	0	0	0	0
042d59907d9eab66f7b4fea89525aed1	k__Fungi	p__unidentified	c__unidentified	o__unidentified	f__unidentified	g__unidentified	s__unidentified	0	0	0	0	0	0	0	0	0	0	0	0	0	0	0	0	0	0	0	0	0	0	0	0	0	0	0	0	0	0	0	0	0	0	0	0	0	0	0	0	0	0
042e0051f4955c98ce6f6f59d4b90016	k__Fungi	p__unidentified	c__unidentified	o__unidentified	f__unidentified	g__unidentified	s__unidentified	0	0	0	0	0	0	0	0	0	0	0	0	6	0	0	0	0	0	0	0	0	0	0	0	0	0	0	0	0	0	0	0	0	0	0	0	0	0	0	0	0	0
0435685832d2407ecdbbc36d62040ab4	k__Fungi	p__unidentified	c__unidentified	o__unidentified	f__unidentified	g__unidentified	s__unidentified	0	0	0	0	0	0	0	0	0	0	0	0	0	0	0	0	0	0	0	0	0	0	0	0	0	0	0	0	0	0	0	0	0	0	0	0	0	0	0	0	0	0
0438c9760a11969c0e246ae699548316	k__Fungi	p__Basidiomycota	c__Microbotryomycetes	o__Leucosporidiales	f__Leucosporidiaceae	g__Leucosporidium	s__Leucosporidium_muscorum	0	0	0	0	0	0	0	0	0	0	0	0	0	0	0	0	0	0	0	0	0	0	0	0	0	0	0	0	0	0	0	0	0	0	0	0	0	0	0	0	0	0
0438ed8648b122502d53db779bbf436f	k__Fungi	p__Chytridiomycota	c__unidentified	o__unidentified	f__unidentified	g__unidentified	s__unidentified	0	0	0	0	0	0	0	0	0	0	0	0	0	0	0	0	0	0	0	0	0	0	0	0	0	0	0	0	0	0	0	0	0	0	0	0	0	0	0	0	0	0
04442acb89ef9528c9869f4057c40246	k__Fungi	p__Rozellomycota	c__unidentified	o__unidentified	f__unidentified	g__unidentified	s__unidentified	0	0	0	0	0	0	0	0	0	0	0	0	0	0	0	0	0	0	0	0	0	0	0	0	0	0	0	0	0	0	0	0	0	0	0	0	0	0	0	0	0	0
04463afc175e182eb37325cf1c592785	k__Fungi	p__unidentified	c__unidentified	o__unidentified	f__unidentified	g__unidentified	s__unidentified	0	0	0	0	0	0	0	0	0	0	0	0	0	0	0	0	0	0	0	0	0	0	0	0	0	0	0	0	0	0	0	0	0	0	0	0	0	0	0	0	0	0
0458ca0c978e49c7474131f797359bb1	k__Fungi	p__Ascomycota	c__Sordariomycetes	o__Myrmecridiales	f__Myrmecridiaceae	g__Myrmecridium	s__Myrmecridium_hiemale	0	0	0	0	0	0	0	0	0	0	0	0	0	0	0	0	0	0	0	0	0	0	0	0	0	0	0	0	0	0	0	0	0	0	0	0	0	0	0	0	0	0
045c2d65e5cd05ceaeafa651af4fd98f	k__Fungi	p__unidentified	c__unidentified	o__unidentified	f__unidentified	g__unidentified	s__unidentified	0	0	0	14	0	0	0	0	0	0	0	0	0	0	0	0	0	0	0	0	0	0	0	0	0	0	0	0	0	0	0	0	0	0	0	0	0	0	0	0	0	0
045ebe559d7d122044e24df18473dbe5	k__Fungi	p__unidentified	c__unidentified	o__unidentified	f__unidentified	g__unidentified	s__unidentified	0	0	0	0	0	0	0	0	0	0	0	0	0	0	0	0	0	0	0	0	0	0	0	0	0	0	0	0	0	0	0	0	0	0	0	0	0	0	0	0	0	0
04661ec61ba87066a7639f98eb3eda64	k__Fungi	p__unidentified	c__unidentified	o__unidentified	f__unidentified	g__unidentified	s__unidentified	0	0	0	0	0	0	0	0	0	0	0	0	0	0	0	0	0	0	0	0	0	0	0	0	0	0	0	0	0	0	0	0	0	0	0	0	0	0	0	0	0	0
046bb3077b7ffbba96ffe8779a06029e	k__Fungi	p__unidentified	c__unidentified	o__unidentified	f__unidentified	g__unidentified	s__unidentified	0	0	0	0	0	0	0	0	0	0	0	0	0	0	0	0	0	0	0	0	0	0	0	0	0	0	0	0	0	0	0	0	0	0	0	0	0	0	0	0	0	0
0470e2f5f457c394d7f96ad310522b2b	k__Fungi	p__Ascomycota	c__Sordariomycetes	o__Sordariales	f__Chaetomiaceae	g__unidentified	s__unidentified	0	0	0	0	0	0	0	0	0	0	0	0	0	0	0	0	0	0	0	0	0	0	0	0	0	0	0	0	0	0	0	0	0	0	0	0	0	0	0	0	0	0
0475ec0e32be0e5f4d23fc8a43329700	k__Fungi	p__unidentified	c__unidentified	o__unidentified	f__unidentified	g__unidentified	s__unidentified	0	0	0	0	0	0	0	0	0	0	0	0	0	0	0	0	0	0	0	0	0	0	0	0	0	0	0	0	0	0	0	0	0	0	0	0	0	0	0	0	0	0
0477006d03ab9f93a86c8c99e4e6b8da	k__Fungi	p__unidentified	c__unidentified	o__unidentified	f__unidentified	g__unidentified	s__unidentified	0	14	0	0	0	0	0	0	0	0	0	0	0	0	0	0	0	0	0	0	0	0	0	0	0	0	0	0	0	0	0	0	0	0	0	0	0	0	0	0	0	0
047fa1ed9c6c243ecde77178c12e5216	k__Fungi	p__unidentified	c__unidentified	o__unidentified	f__unidentified	g__unidentified	s__unidentified	0	1412	901	0	0	990	0	0	0	0	0	0	0	2160	0	0	0	0	0	0	0	0	0	0	0	0	0	0	0	0	0	861	0	0	1972	1815	0	0	1049	442	0	0
048251ebdad81dca8660390f8e5d48fd	k__Fungi	p__unidentified	c__unidentified	o__unidentified	f__unidentified	g__unidentified	s__unidentified	0	3	0	0	0	0	0	0	0	0	0	0	0	0	0	0	0	0	0	0	0	0	0	0	0	0	0	0	0	0	0	0	0	0	0	0	0	0	0	0	0	0
04852b359c4f28e6d7fb1ee9b18d9f27	k__Fungi	p__Chytridiomycota	c__unidentified	o__unidentified	f__unidentified	g__unidentified	s__unidentified	0	0	0	0	0	0	0	0	0	0	0	0	0	0	0	0	0	0	0	0	0	0	0	0	0	0	0	0	0	0	0	0	0	0	0	0	0	0	0	0	0	0
048d01a59e5bed1bfee9c80fcc51f4e8	k__Fungi	p__Ascomycota	c__Eurotiomycetes	o__Eurotiales	f__Aspergillaceae	g__Aspergillus	s__Aspergillus_sydowii	0	0	0	0	0	0	0	0	0	0	0	0	0	0	0	0	0	0	0	0	0	0	0	0	0	0	0	0	0	0	0	0	0	0	0	0	0	37	0	0	0	0
048e6211b2ee265e08ef52569c617e76	k__Fungi	p__Ascomycota	c__Lecanoromycetes	o__Caliciales	f__Caliciaceae	g__unidentified	s__unidentified	0	0	0	0	0	0	0	0	0	0	0	0	0	0	0	0	0	0	0	0	0	0	0	0	0	0	0	0	0	0	0	0	0	0	0	0	0	0	0	0	0	0
0491cc4e3049896f22bf0986044c9aa2	k__Fungi	p__unidentified	c__unidentified	o__unidentified	f__unidentified	g__unidentified	s__unidentified	0	0	0	0	0	0	0	0	0	0	0	0	0	0	0	0	0	0	0	0	0	0	0	0	0	0	0	0	0	0	0	0	0	0	0	0	0	10	0	0	0	0
04922bb561d74835764c79e4494ca95b	k__Fungi	p__unidentified	c__unidentified	o__unidentified	f__unidentified	g__unidentified	s__unidentified	0	0	0	0	0	0	0	0	0	0	0	0	0	2	0	0	0	0	0	0	0	0	0	0	0	0	0	0	0	0	0	0	0	0	0	0	0	0	0	0	0	0
0496eb5f52e75baa15f9152a943b5423	k__Fungi	p__unidentified	c__unidentified	o__unidentified	f__unidentified	g__unidentified	s__unidentified	0	0	0	0	0	0	0	0	0	0	0	0	0	0	0	0	0	0	0	0	0	0	0	0	0	0	0	0	0	0	0	0	0	0	0	0	0	0	0	0	0	0
0499130c39d8f9b5bade697b97961c2e	k__Fungi	p__Ascomycota	c__Leotiomycetes	o__Helotiales	f__Helotiales_fam_Incertae_sedis	g__Cadophora	s__Cadophora_gregata	0	0	0	0	11	0	0	0	43	0	0	113	0	0	0	0	0	0	0	0	0	0	0	0	0	0	0	0	0	0	0	0	0	0	0	0	0	0	0	0	0	0
049f0cb55e9b98598d36de36e5341b1b	k__Fungi	p__Mortierellomycota	c__Mortierellomycetes	o__Mortierellales	f__Mortierellaceae	g__Mortierella	s__unidentified	0	0	0	0	0	0	0	0	0	0	0	0	0	0	0	0	0	0	0	0	0	0	0	0	0	0	0	0	0	0	0	0	0	0	0	0	0	0	0	0	0	0
049f2f93fd7fe1e627d8ddd307e60248	k__Fungi	p__unidentified	c__unidentified	o__unidentified	f__unidentified	g__unidentified	s__unidentified	0	0	0	0	0	0	0	0	0	0	0	0	0	0	0	0	0	0	0	0	0	0	0	0	0	0	0	0	0	0	0	0	0	0	0	0	0	0	0	0	0	0
04a1a2db7cbea95e938abe6684bdad5f	k__Fungi	p__unidentified	c__unidentified	o__unidentified	f__unidentified	g__unidentified	s__unidentified	0	0	0	0	0	0	0	0	0	0	0	0	0	0	0	0	0	0	0	0	0	0	0	0	0	0	0	0	0	0	0	0	0	0	0	0	0	0	0	0	0	0
04a513d6278b95cf17259662201b72f0	k__Fungi	p__Ascomycota	c__Dothideomycetes	o__Capnodiales	f__Teratosphaeriaceae	g__Recurvomyces	s__unidentified	0	0	0	0	0	0	0	0	0	0	0	0	0	0	63	0	0	0	0	0	0	0	0	0	0	0	0	0	0	0	0	0	0	0	0	0	0	0	0	0	0	0
04a96d1826fd09cec714f1a2a3e632e6	k__Fungi	p__unidentified	c__unidentified	o__unidentified	f__unidentified	g__unidentified	s__unidentified	0	0	0	0	0	0	0	0	0	0	0	0	0	0	0	0	0	0	0	0	0	0	0	0	0	0	0	0	0	0	0	0	0	0	0	0	0	0	0	0	0	0
04ac768e4d135d049ba3fcb5247eaa33	k__Fungi	p__unidentified	c__unidentified	o__unidentified	f__unidentified	g__unidentified	s__unidentified	0	0	0	0	0	0	0	0	0	0	0	0	0	0	0	0	0	0	0	0	0	0	0	0	0	0	0	0	0	0	0	0	0	0	0	0	0	0	0	0	0	0
04b24bb94d4349006e639c6652f64452	k__Fungi	p__Ascomycota	c__Leotiomycetes	o__Helotiales	f__Helotiales_fam_Incertae_sedis	g__unidentified	s__unidentified	0	0	0	0	0	0	0	0	0	0	0	0	0	0	0	0	0	0	0	0	0	0	0	0	0	0	0	0	0	0	0	0	0	0	0	0	0	0	0	0	0	0
04b5f5b55047caf85eb01cfb93a189ad	k__Fungi	p__unidentified	c__unidentified	o__unidentified	f__unidentified	g__unidentified	s__unidentified	0	0	0	0	0	0	0	0	0	0	0	0	0	0	0	0	0	0	0	0	0	0	0	0	0	0	0	0	0	0	0	0	0	0	0	0	0	0	0	0	0	0
04bbee57565dccab5f340350aedd5320	k__Fungi	p__unidentified	c__unidentified	o__unidentified	f__unidentified	g__unidentified	s__unidentified	0	0	0	0	0	0	0	0	0	0	0	0	0	0	0	0	0	0	0	0	0	0	0	0	0	0	0	0	0	0	0	0	0	0	0	0	0	0	0	0	0	0
04bd969a70c766f809bb2d60143fdddc	k__Fungi	p__unidentified	c__unidentified	o__unidentified	f__unidentified	g__unidentified	s__unidentified	0	0	0	13	0	0	0	0	0	0	0	0	0	0	0	0	0	0	0	0	0	0	0	0	0	0	0	0	0	0	0	0	0	0	0	0	0	0	0	0	0	0
04bf62e9ea6fae4342920197bee19ee6	k__Fungi	p__unidentified	c__unidentified	o__unidentified	f__unidentified	g__unidentified	s__unidentified	0	0	0	0	0	0	0	0	0	0	0	0	0	0	0	0	0	0	0	0	0	0	0	0	0	0	0	0	0	0	0	0	0	0	0	0	0	0	0	0	0	0
04c11f0f2f33d64e46316be50d5299b3	k__Fungi	p__unidentified	c__unidentified	o__unidentified	f__unidentified	g__unidentified	s__unidentified	0	0	0	0	0	0	0	0	0	0	0	0	0	0	0	0	0	0	0	0	0	0	0	0	0	0	0	0	0	0	0	0	0	0	0	0	0	0	0	0	0	0
04c523d5e54cd85a64ba4ff53082dba5	k__Fungi	p__unidentified	c__unidentified	o__unidentified	f__unidentified	g__unidentified	s__unidentified	0	0	0	0	0	0	0	0	0	0	0	61	0	0	0	0	0	0	0	0	0	0	0	0	0	0	0	0	0	0	0	0	0	0	0	0	0	0	0	0	9	0
04c527302a21795b16f715ce87932db8	k__Fungi	p__Rozellomycota	c__unidentified	o__unidentified	f__unidentified	g__unidentified	s__unidentified	0	0	0	0	0	0	0	0	0	0	0	0	0	0	0	0	0	0	0	0	0	0	0	0	0	0	0	0	0	0	0	0	0	0	0	0	0	0	0	0	0	0
04c9f5b7f0724656b33e4030c1ed18eb	k__Fungi	p__unidentified	c__unidentified	o__unidentified	f__unidentified	g__unidentified	s__unidentified	0	0	0	0	0	0	0	0	0	0	0	0	0	0	0	0	0	0	0	0	0	0	0	0	0	0	0	0	0	0	0	0	0	0	0	0	0	0	0	0	0	0
04ce13e2f432580ade82718a751b220c	k__Fungi	p__Chytridiomycota	c__unidentified	o__unidentified	f__unidentified	g__unidentified	s__unidentified	0	0	0	0	0	0	0	0	0	0	0	0	0	0	0	0	0	0	0	0	0	0	0	0	0	0	0	0	0	0	0	0	0	0	0	0	0	0	0	0	0	0
04d3ef6761a69a94246c26f897bfbffc	k__Fungi	p__Chytridiomycota	c__unidentified	o__unidentified	f__unidentified	g__unidentified	s__unidentified	0	0	0	0	0	0	0	0	0	0	0	0	0	0	0	0	0	0	0	0	0	0	0	0	0	0	0	0	0	0	0	0	0	0	0	0	0	0	0	0	0	0
04d54523ac6accaa420f01ff70a04f00	k__Fungi	p__unidentified	c__unidentified	o__unidentified	f__unidentified	g__unidentified	s__unidentified	0	0	0	0	0	0	0	0	0	0	8	0	0	0	0	0	0	0	0	0	0	0	0	0	0	0	0	0	0	0	0	0	0	0	0	0	0	0	0	0	0	0
04d9a27c6e064a4f63583208db54809d	k__Fungi	p__Ascomycota	c__Sordariomycetes	o__Hypocreales	f__unidentified	g__unidentified	s__unidentified	0	0	0	0	0	0	0	0	0	0	0	0	0	0	0	0	0	0	0	0	0	0	0	0	0	0	0	0	0	0	0	0	0	0	0	0	0	0	55	0	0	0
04e4f7c7a9e2e7baf914b6d4c7864ad4	k__Fungi	p__Chytridiomycota	c__unidentified	o__unidentified	f__unidentified	g__unidentified	s__unidentified	0	0	0	0	0	0	0	0	0	0	0	0	0	0	0	0	0	0	0	0	0	0	0	0	0	0	0	0	0	0	0	0	0	0	0	0	0	0	0	0	0	0
04e7ebea52eeb476c692ee3aeea89f26	k__Fungi	p__unidentified	c__unidentified	o__unidentified	f__unidentified	g__unidentified	s__unidentified	0	0	0	0	0	0	0	0	0	0	0	0	0	0	0	0	0	0	0	0	0	0	0	0	0	0	0	0	0	0	0	0	0	0	0	0	0	0	0	0	0	0
04ea660aa9da362994d4a9e82700855c	k__Fungi	p__Ascomycota	c__unidentified	o__unidentified	f__unidentified	g__unidentified	s__unidentified	0	0	0	0	0	0	0	0	0	0	0	0	0	0	0	0	0	0	0	0	0	0	0	0	0	17	0	0	0	0	0	0	0	0	0	0	0	0	0	0	0	0
04ed0c4aa13952656e52ecd924f1032c	k__Fungi	p__Ascomycota	c__Sordariomycetes	o__Hypocreales	f__Nectriaceae	g__Fusarium	s__Fusarium_nurragi	0	0	0	0	0	0	0	0	0	0	0	0	0	0	0	0	0	0	0	0	0	0	0	0	0	0	0	0	0	0	0	0	0	0	0	0	0	0	0	0	0	0
04edc2d60815e7020bcef5363ef33589	k__Fungi	p__unidentified	c__unidentified	o__unidentified	f__unidentified	g__unidentified	s__unidentified	0	0	0	0	0	0	0	0	0	0	0	0	0	0	0	0	0	0	0	0	0	0	0	0	0	0	0	0	0	0	0	0	0	0	0	0	0	0	0	0	0	0
04eeef2d1d5b2246898c86445e0f59eb	k__Fungi	p__unidentified	c__unidentified	o__unidentified	f__unidentified	g__unidentified	s__unidentified	0	0	0	0	0	0	0	0	0	0	16	0	0	0	0	0	0	0	0	0	0	0	0	0	0	0	0	0	0	0	0	0	0	0	0	0	0	0	0	0	0	0
04f5b0373cc9369eb229350581354d50	k__Fungi	p__unidentified	c__unidentified	o__unidentified	f__unidentified	g__unidentified	s__unidentified	0	0	0	0	0	0	0	0	0	0	0	0	0	0	0	0	0	0	0	0	0	0	0	0	0	0	0	0	0	0	0	0	0	0	0	0	0	0	0	0	0	0
04f84adbfd6b12ebef8b6cfed4d733f9	k__Fungi	p__unidentified	c__unidentified	o__unidentified	f__unidentified	g__unidentified	s__unidentified	0	0	0	0	0	0	0	0	0	0	0	0	0	0	0	0	0	0	0	0	0	0	0	0	0	0	0	0	0	0	0	0	0	0	0	0	0	0	0	0	0	0
04fcd31c80e36b6ccfff2650dea322bd	k__Fungi	p__unidentified	c__unidentified	o__unidentified	f__unidentified	g__unidentified	s__unidentified	0	0	0	0	0	0	0	0	0	0	0	0	0	0	0	0	0	0	0	0	0	0	0	0	0	0	0	0	0	0	0	0	0	0	0	0	0	0	0	0	0	0
04fe84014da9110b84876dbd1bcfcb7d	k__Fungi	p__Rozellomycota	c__unidentified	o__unidentified	f__unidentified	g__unidentified	s__unidentified	0	0	0	0	0	0	0	0	0	0	0	0	0	0	0	0	0	0	0	0	0	0	0	0	0	0	0	0	0	0	0	0	0	0	0	0	0	0	0	0	0	0
05052b4ba48307578657612c72f0e77a	k__Fungi	p__Chytridiomycota	c__unidentified	o__unidentified	f__unidentified	g__unidentified	s__unidentified	0	0	0	0	0	0	0	0	0	0	0	0	0	0	0	0	0	0	0	0	0	0	0	0	0	0	0	0	0	0	0	0	0	0	0	0	0	0	0	0	0	0
05075c31ac5c808d38578329366e4bff	k__Fungi	p__unidentified	c__unidentified	o__unidentified	f__unidentified	g__unidentified	s__unidentified	0	0	0	0	0	0	0	0	0	0	0	0	0	0	0	0	0	0	0	0	0	0	0	0	0	0	0	0	0	0	0	0	0	0	0	0	0	0	0	0	0	0
0507f1e23e9d6e8aea865a86875c8fc5	k__Fungi	p__unidentified	c__unidentified	o__unidentified	f__unidentified	g__unidentified	s__unidentified	0	0	0	0	0	0	0	0	0	0	0	0	0	0	0	0	0	0	0	0	0	0	0	0	0	0	0	0	0	0	0	0	0	0	0	0	0	0	0	0	0	0
050a761879078fbecc283784a6270d6a	k__Fungi	p__Ascomycota	c__Leotiomycetes	o__Helotiales	f__Hyaloscyphaceae	g__Lachnellula	s__Lachnellula_fuscosanguinea	0	0	0	0	0	0	0	0	0	0	0	0	0	0	0	0	0	0	0	0	0	0	0	0	0	0	0	0	0	0	0	0	0	0	0	0	0	0	0	0	0	0
050c9385dc1d25e9762c2132d5eee4d2	k__Fungi	p__unidentified	c__unidentified	o__unidentified	f__unidentified	g__unidentified	s__unidentified	0	0	0	0	0	0	0	0	0	0	0	0	0	0	54	0	0	0	0	0	0	0	0	0	0	0	0	0	0	0	0	0	0	0	0	0	0	0	0	0	0	0
05114da93d07e02344751f55d3e9d576	k__Fungi	p__unidentified	c__unidentified	o__unidentified	f__unidentified	g__unidentified	s__unidentified	0	0	0	0	0	0	0	0	0	0	0	0	0	0	0	0	0	0	0	0	0	0	0	0	0	0	0	0	0	0	0	0	0	0	0	0	0	0	0	0	0	0
0513005b0000c39c3f7555e1e5a4d724	k__Fungi	p__unidentified	c__unidentified	o__unidentified	f__unidentified	g__unidentified	s__unidentified	0	4	0	0	0	0	0	0	0	0	0	0	0	0	0	0	0	0	0	0	0	0	0	0	0	0	0	0	0	0	0	0	0	0	0	0	0	0	0	0	0	0
05159a301802964b000c06197202700a	k__Fungi	p__unidentified	c__unidentified	o__unidentified	f__unidentified	g__unidentified	s__unidentified	0	0	0	0	0	0	0	0	0	0	0	0	0	0	0	0	0	0	0	0	0	0	0	0	0	0	0	0	0	0	0	0	0	0	0	0	0	0	0	0	0	0
0518f9c7e29d6b4ab1cc1635fef287f2	k__Fungi	p__Ascomycota	c__unidentified	o__unidentified	f__unidentified	g__unidentified	s__unidentified	0	0	0	0	0	0	0	0	0	0	0	0	0	0	0	0	0	0	0	0	0	0	166	0	0	0	0	0	0	0	0	0	0	0	0	0	0	0	0	0	0	0
051dffe087ed596ff5389c4425bee066	k__Fungi	p__Chytridiomycota	c__unidentified	o__unidentified	f__unidentified	g__unidentified	s__unidentified	0	0	0	0	0	0	0	0	0	0	0	0	0	0	0	0	0	0	0	0	0	0	0	0	0	0	0	0	0	0	0	0	0	0	0	0	0	0	0	0	0	0
051f2e67fc76de9569ea67b7d5de01a1	k__Fungi	p__unidentified	c__unidentified	o__unidentified	f__unidentified	g__unidentified	s__unidentified	0	0	0	0	0	0	0	0	0	0	0	0	0	0	0	0	0	0	0	0	0	0	0	0	0	0	0	0	0	0	0	0	0	0	0	0	0	0	0	0	0	0
0523238cd64043d9cf235fc7cbc9ac8d	k__Fungi	p__unidentified	c__unidentified	o__unidentified	f__unidentified	g__unidentified	s__unidentified	0	0	0	0	0	0	0	0	0	0	9	0	0	0	0	0	0	0	0	0	0	0	0	0	0	0	0	0	0	0	0	0	0	0	0	0	0	0	0	0	0	0
05254fa40d63d40414929dceacb85942	k__Fungi	p__Ascomycota	c__Eurotiomycetes	o__Verrucariales	f__Verrucariaceae	g__unidentified	s__unidentified	0	0	0	0	0	0	0	0	0	0	0	0	0	0	108	0	0	0	0	0	0	0	0	0	0	0	0	0	0	0	0	0	0	0	0	0	0	0	0	0	0	0
05371b272ef7688841e1a1b24669648a	k__Fungi	p__unidentified	c__unidentified	o__unidentified	f__unidentified	g__unidentified	s__unidentified	0	0	0	0	0	0	0	19	0	0	0	0	0	0	0	0	0	0	0	0	0	0	0	0	0	0	0	0	0	0	0	0	0	0	0	0	0	0	0	0	0	0
053985481f8d4438f4a39d9a896dbc60	k__Fungi	p__unidentified	c__unidentified	o__unidentified	f__unidentified	g__unidentified	s__unidentified	0	0	0	0	0	0	0	0	0	0	0	0	0	0	5	0	0	0	0	0	0	0	0	0	0	0	0	0	0	0	0	0	0	0	0	0	0	0	0	0	0	0
053fed433adf9987a95c68dd7965d973	k__Fungi	p__unidentified	c__unidentified	o__unidentified	f__unidentified	g__unidentified	s__unidentified	0	0	0	0	0	0	0	0	0	0	0	0	0	0	0	0	0	0	0	0	0	0	0	0	0	0	0	0	0	0	0	0	0	0	0	0	0	0	0	0	0	0
05420bf4f191bc44fef72bc868c07379	k__Fungi	p__unidentified	c__unidentified	o__unidentified	f__unidentified	g__unidentified	s__unidentified	0	0	0	0	0	0	0	0	0	0	0	0	0	0	0	0	0	0	0	0	0	0	0	0	0	0	0	0	0	0	0	0	0	0	0	0	0	0	0	0	0	0
05424d4c7267627c236fe4261a3ab68e	k__Fungi	p__unidentified	c__unidentified	o__unidentified	f__unidentified	g__unidentified	s__unidentified	0	0	0	0	0	0	0	0	0	0	0	0	0	0	0	0	0	0	0	0	0	0	0	0	0	0	0	0	0	0	0	0	0	0	0	0	0	0	0	0	0	0
0547889c9ef6306e9da10893d21bac35	k__Fungi	p__Basidiomycota	c__Microbotryomycetes	o__Kriegeriales	f__Kriegeriaceae	g__Phenoliferia	s__Phenoliferia_psychrophila	0	0	0	0	0	0	0	0	0	0	0	0	0	0	0	0	0	0	0	0	0	6	0	0	0	0	0	0	0	0	0	0	0	0	0	0	0	0	0	0	0	0
054ec1b756335ef37c562db91f1766ea	k__Fungi	p__Mortierellomycota	c__Mortierellomycetes	o__Mortierellales	f__Mortierellaceae	g__Mortierella	s__Mortierella_zonata	0	0	0	0	0	0	0	0	0	0	0	0	0	0	0	0	0	0	0	0	0	0	0	0	0	0	0	0	0	0	0	0	0	0	0	0	0	0	0	0	0	0
054efebce686f548a8156a1b8ae2cae6	k__Fungi	p__unidentified	c__unidentified	o__unidentified	f__unidentified	g__unidentified	s__unidentified	0	0	0	0	0	0	0	0	0	0	0	0	0	0	0	0	0	0	0	0	0	0	0	0	0	0	0	0	0	0	0	0	0	0	0	0	0	0	0	0	0	0
05502c8bf0c5a82217d7431f41053e54	k__Fungi	p__Chytridiomycota	c__unidentified	o__unidentified	f__unidentified	g__unidentified	s__unidentified	0	0	0	0	0	0	0	0	0	0	0	0	0	0	0	0	0	0	0	0	0	0	0	0	0	0	0	0	0	0	0	0	0	0	0	0	0	0	0	0	0	0
0552730546fa5c4e6303d7e8e9ddc718	k__Fungi	p__unidentified	c__unidentified	o__unidentified	f__unidentified	g__unidentified	s__unidentified	0	0	0	0	0	0	0	0	0	0	0	0	0	0	0	0	0	0	0	0	0	0	0	0	0	0	0	0	0	0	0	0	0	0	0	0	0	0	0	0	0	0
0552808e4b1a2052f7696da5f2bd619c	k__Fungi	p__Ascomycota	c__unidentified	o__unidentified	f__unidentified	g__unidentified	s__unidentified	0	0	0	0	0	0	0	0	0	0	0	0	0	0	0	0	0	0	0	0	0	0	0	0	0	0	0	0	0	0	0	0	0	0	0	0	0	0	0	0	0	0
0555b29abb43ebcd2e48cd5efa67b6d0	k__Fungi	p__Ascomycota	c__Lecanoromycetes	o__Lecanorales	f__Ramalinaceae	g__Bacidina	s__Bacidina_arnoldiana	0	0	0	0	0	0	0	0	0	0	0	0	0	0	0	0	0	0	0	0	0	0	0	0	0	0	0	0	0	0	0	0	0	0	0	0	0	0	0	0	0	0
056374663bdfb0b8586d7f5979a331e8	k__Fungi	p__Ascomycota	c__Leotiomycetes	o__Helotiales	f__Helotiaceae	g__Ascocoryne	s__unidentified	0	0	0	0	0	0	0	0	0	0	0	0	0	0	0	0	0	0	0	0	0	0	0	0	0	0	0	0	0	0	0	0	0	0	0	0	0	0	0	0	0	0
0564a37b3a072d8c0069334c5bab27ec	k__Fungi	p__Ascomycota	c__Sordariomycetes	o__Hypocreales	f__Hypocreaceae	g__Trichoderma	s__unidentified	0	0	0	0	0	0	0	0	0	0	0	0	0	0	0	0	0	0	0	0	0	0	0	0	0	0	0	0	0	0	0	0	0	0	0	0	0	0	0	0	0	0
056a7cf3e05a71e32ae4532bd16be74f	k__Fungi	p__unidentified	c__unidentified	o__unidentified	f__unidentified	g__unidentified	s__unidentified	0	0	0	0	0	0	0	0	0	0	0	0	0	0	0	0	0	0	0	0	0	0	0	0	0	0	0	0	0	0	0	0	0	0	0	0	0	0	0	0	0	0
0570d3f8b37172a757634c2d1134bdac	k__Fungi	p__Ascomycota	c__Lecanoromycetes	o__Lecanorales	f__Ramalinaceae	g__unidentified	s__unidentified	0	0	0	0	0	0	0	0	0	0	0	0	0	0	0	0	0	0	0	0	0	0	0	0	0	0	0	0	0	0	0	0	0	0	0	0	0	0	0	0	0	0
0572297dca20e17dc8d07c30308ccbcd	k__Fungi	p__Basidiomycota	c__Tremellomycetes	o__Cystofilobasidiales	f__Mrakiaceae	g__Mrakia	s__Mrakia_frigida	0	0	0	0	0	0	0	0	0	0	0	0	0	0	0	0	0	0	0	0	0	0	0	0	0	0	0	0	0	0	0	0	0	0	0	0	0	0	17	0	0	0
057605ab84901ee13223e4a7639da3a7	k__Fungi	p__unidentified	c__unidentified	o__unidentified	f__unidentified	g__unidentified	s__unidentified	0	0	0	0	0	0	0	0	0	0	0	0	0	0	0	0	0	0	0	0	0	0	0	0	0	0	0	0	0	0	0	0	0	0	0	0	0	0	0	0	0	0
057aa28957e3d936cbf85af184fce68d	k__Fungi	p__unidentified	c__unidentified	o__unidentified	f__unidentified	g__unidentified	s__unidentified	0	0	0	0	0	0	0	0	0	0	0	0	0	0	0	0	0	0	0	6	0	0	0	0	0	0	0	0	0	0	0	0	0	0	0	0	0	0	0	0	0	0
0580224837b39df2da845c5ca18e01d6	k__Fungi	p__Ascomycota	c__Sordariomycetes	o__Hypocreales	f__Nectriaceae	g__Xenoacremonium	s__Xenoacremonium_falcatum	0	0	0	0	0	0	0	0	0	0	0	0	0	0	0	0	0	0	0	0	0	0	0	0	0	0	0	0	0	0	0	0	0	0	0	0	0	0	0	0	0	0
0582398360ccc57874ad88d0322aec77	k__Fungi	p__unidentified	c__unidentified	o__unidentified	f__unidentified	g__unidentified	s__unidentified	0	0	0	0	0	0	0	0	0	0	0	0	0	0	0	0	0	0	0	0	0	0	0	0	0	0	0	0	0	0	0	0	0	0	0	0	0	0	0	0	0	0
058a2988a01cc843359b481207772be6	k__Fungi	p__unidentified	c__unidentified	o__unidentified	f__unidentified	g__unidentified	s__unidentified	0	0	0	0	0	0	0	0	0	0	0	0	0	0	0	0	0	0	0	0	0	0	0	0	0	0	0	0	0	0	0	0	0	0	0	0	0	0	0	0	0	0
058c9edd17119b11eb0bb7624560899f	k__Fungi	p__unidentified	c__unidentified	o__unidentified	f__unidentified	g__unidentified	s__unidentified	0	0	0	0	0	0	0	0	0	0	0	0	0	0	0	0	0	0	0	0	0	0	0	0	0	0	0	0	0	0	0	0	0	0	0	0	0	5	0	0	0	0
058d7f2369ff5c23c6e852949a2c55d7	k__Fungi	p__unidentified	c__unidentified	o__unidentified	f__unidentified	g__unidentified	s__unidentified	0	0	0	0	0	0	0	0	0	0	0	0	0	0	0	0	0	0	0	0	0	0	0	0	0	0	0	0	0	0	0	0	0	0	0	0	0	0	0	0	0	0
058ea5c1dc1d7eff7cf0fad49da0e1b5	k__Fungi	p__unidentified	c__unidentified	o__unidentified	f__unidentified	g__unidentified	s__unidentified	0	0	0	0	0	0	0	0	0	0	0	0	0	0	0	0	0	0	0	0	0	0	0	0	0	0	0	0	0	0	0	0	0	0	0	0	0	0	0	0	0	0
058fbc5a6028d87065a42eacfc3663d5	k__Fungi	p__unidentified	c__unidentified	o__unidentified	f__unidentified	g__unidentified	s__unidentified	0	0	0	0	0	0	0	0	0	0	0	0	0	0	0	0	0	0	0	0	0	0	0	0	0	0	0	0	0	0	0	0	0	0	0	0	0	0	0	0	0	0
058fe7a21dd8632d2723f1b110f14f1d	k__Fungi	p__unidentified	c__unidentified	o__unidentified	f__unidentified	g__unidentified	s__unidentified	0	0	0	0	0	0	0	0	0	0	0	0	0	0	0	0	0	0	0	0	0	0	0	0	0	0	0	0	0	0	0	0	0	0	0	0	0	0	0	0	0	0
05913f19c906d7052713df12218cf059	k__Fungi	p__Ascomycota	c__Sordariomycetes	o__Hypocreales	f__Nectriaceae	g__Xenoacremonium	s__Xenoacremonium_falcatum	0	0	0	9	0	0	0	0	0	0	0	0	0	0	0	0	0	0	0	0	0	0	0	0	0	0	0	0	0	12103	0	0	0	0	0	0	0	0	0	0	0	0
059b5fedbb1d11538e455f5de371778c	k__Fungi	p__unidentified	c__unidentified	o__unidentified	f__unidentified	g__unidentified	s__unidentified	0	0	0	0	0	0	0	0	0	0	0	0	0	0	0	0	0	0	0	0	0	0	0	0	0	0	0	0	0	0	0	0	0	0	0	0	0	0	0	0	0	0
059c2170d5c92c44253077d6c2c7a63d	k__Fungi	p__Chytridiomycota	c__Rhizophydiomycetes	o__Rhizophydiales	f__Halomycetaceae	g__Paranamyces	s__Paranamyces_uniporus	0	0	0	0	0	0	0	0	0	0	0	0	0	0	0	0	0	0	0	0	0	0	0	0	0	0	0	0	0	0	0	0	0	0	0	0	0	0	0	0	0	0
05a1d06f1a33b9f3f8502a84c0aeeb27	k__Fungi	p__unidentified	c__unidentified	o__unidentified	f__unidentified	g__unidentified	s__unidentified	0	0	0	0	0	0	0	0	0	0	0	0	0	0	0	0	0	0	0	0	0	0	0	0	0	0	0	0	0	0	0	0	0	0	0	0	0	0	0	0	0	0
05a3e1cdbb178d1817005796aff599db	k__Fungi	p__unidentified	c__unidentified	o__unidentified	f__unidentified	g__unidentified	s__unidentified	0	0	0	0	0	0	0	0	0	0	0	0	0	0	0	0	0	0	0	0	0	0	0	0	0	0	0	0	0	0	0	0	0	0	0	0	0	0	0	0	0	0
05a50a2ac401c74692b5e7488434609c	k__Fungi	p__Ascomycota	c__Dothideomycetes	o__Capnodiales	f__Mycosphaerellaceae	g__Zymoseptoria	s__unidentified	0	0	0	0	0	0	0	0	0	0	0	0	0	0	0	0	0	0	0	0	0	0	0	0	0	0	0	0	0	0	0	0	0	0	0	0	0	0	0	0	0	0
05a7946dad2be4c320aeb1ff8b81f1c1	k__Fungi	p__unidentified	c__unidentified	o__unidentified	f__unidentified	g__unidentified	s__unidentified	0	0	0	17	0	0	0	0	0	0	0	0	0	0	0	0	0	0	0	0	0	0	0	0	0	0	0	0	0	57	0	0	0	0	0	0	0	0	0	0	0	0
05a7c23d78d7abf5b3fefa9a536b39c3	k__Fungi	p__unidentified	c__unidentified	o__unidentified	f__unidentified	g__unidentified	s__unidentified	0	0	0	0	0	0	0	0	0	0	0	0	0	0	0	0	0	0	0	0	0	0	0	0	0	0	0	0	0	0	0	0	0	0	0	0	0	0	0	0	0	0
05abd96bf75ec67f1e24941f965f8bcd	k__Fungi	p__Ascomycota	c__Eurotiomycetes	o__Verrucariales	f__Mastodiaceae	g__Mastodia	s__unidentified	0	0	0	0	0	0	0	0	0	0	0	0	0	0	0	0	0	0	0	0	0	0	0	0	0	0	0	0	0	0	0	0	0	0	0	0	0	0	0	0	0	0
05ae92dd5bd63af5230203d56711c365	k__Fungi	p__unidentified	c__unidentified	o__unidentified	f__unidentified	g__unidentified	s__unidentified	0	0	0	0	0	0	0	0	0	0	0	0	0	0	0	0	0	0	0	0	3	0	0	0	0	0	0	0	0	0	0	0	0	0	0	0	0	0	0	0	0	0
05b465e1d08ab7da8712b5446826b7ef	k__Fungi	p__unidentified	c__unidentified	o__unidentified	f__unidentified	g__unidentified	s__unidentified	0	0	0	0	0	0	0	0	0	0	0	0	0	0	0	0	0	0	0	11	107	0	0	0	0	0	0	0	0	0	0	0	0	0	0	0	0	0	0	0	0	0
05b565e1b9223c07e9babdf75fd51177	k__Fungi	p__unidentified	c__unidentified	o__unidentified	f__unidentified	g__unidentified	s__unidentified	0	0	0	0	0	0	0	0	0	0	0	0	0	0	0	0	0	0	0	0	0	0	0	0	0	0	0	0	0	0	0	0	0	0	0	0	0	0	0	0	0	0
05b77a1c3c1f1cfa7404a7d9e7a8f17b	k__Fungi	p__unidentified	c__unidentified	o__unidentified	f__unidentified	g__unidentified	s__unidentified	0	0	0	3	0	0	0	0	0	0	0	0	0	0	0	0	0	0	0	0	0	0	0	0	0	0	0	0	0	0	0	0	0	0	0	0	0	0	0	0	0	0
05b85e8c097b82fbb5be58d48e7f053b	k__Fungi	p__unidentified	c__unidentified	o__unidentified	f__unidentified	g__unidentified	s__unidentified	0	0	0	0	0	0	0	0	0	0	0	0	0	0	0	0	0	0	0	0	0	0	0	0	0	0	0	0	0	0	0	0	0	0	0	0	0	0	0	0	0	0
05baad278ad0eccd5ce90eef7b2fcecf	k__Fungi	p__Ascomycota	c__Eurotiomycetes	o__Verrucariales	f__Verrucariaceae	g__Verrucaria	s__unidentified	0	0	0	0	0	0	0	0	0	0	0	0	0	0	0	0	0	0	0	0	0	0	0	0	0	0	0	0	0	0	0	0	0	0	0	0	0	0	0	0	0	0
05c0a9698e4423c4dd3f8ba1f5f838d8	k__Fungi	p__unidentified	c__unidentified	o__unidentified	f__unidentified	g__unidentified	s__unidentified	0	261	92	0	0	17	0	0	0	0	0	0	0	24	0	0	0	0	0	0	0	0	0	0	0	0	0	0	0	0	0	18618	0	0	9100	6021	0	0	7463	2846	0	0
05c583ae4ba745b3e7bcb4d1844bce38	k__Fungi	p__unidentified	c__unidentified	o__unidentified	f__unidentified	g__unidentified	s__unidentified	0	0	0	0	0	0	0	0	0	0	0	0	0	0	0	0	0	0	0	0	0	0	0	0	0	0	0	0	0	0	0	0	0	0	0	0	0	0	0	0	0	0
05c5d64ca263584df74e9d981c7337a4	k__Fungi	p__unidentified	c__unidentified	o__unidentified	f__unidentified	g__unidentified	s__unidentified	0	0	0	0	0	0	0	0	0	0	0	0	0	0	0	0	0	0	0	0	0	0	0	0	0	0	0	0	0	0	0	0	0	0	0	0	0	0	0	0	0	0
05c70970ac594b5cc99167476295cc77	k__Fungi	p__unidentified	c__unidentified	o__unidentified	f__unidentified	g__unidentified	s__unidentified	0	0	0	0	0	0	0	0	0	0	0	0	0	0	0	0	0	0	0	0	0	0	0	0	0	0	0	0	0	0	0	0	0	0	0	0	0	0	0	0	0	0
05c94e67dcf1dc96633b15df54fe925e	k__Fungi	p__unidentified	c__unidentified	o__unidentified	f__unidentified	g__unidentified	s__unidentified	0	0	0	0	0	0	0	0	0	0	0	0	0	0	0	0	0	0	0	0	0	0	0	0	0	0	0	0	0	0	0	0	0	0	0	0	0	0	0	0	0	0
05cae7444dacf90f432dfa30fa84ae20	k__Fungi	p__unidentified	c__unidentified	o__unidentified	f__unidentified	g__unidentified	s__unidentified	0	0	0	0	0	0	0	0	0	0	0	8	0	0	0	0	0	0	0	0	0	0	0	0	0	0	0	0	0	0	0	0	0	0	0	0	0	0	0	0	0	0
05d37dd03bc77126d25ff1b6db3a1add	k__Fungi	p__unidentified	c__unidentified	o__unidentified	f__unidentified	g__unidentified	s__unidentified	0	0	0	0	0	0	0	0	0	0	0	0	0	0	0	0	0	0	0	0	0	0	0	0	0	0	0	0	0	0	0	0	0	0	0	0	0	0	0	0	0	0
05d3813c9fa4f76bb6f24120b6cb206e	k__Fungi	p__Ascomycota	c__Sordariomycetes	o__Sordariales	f__Sordariaceae	g__Sordaria	s__Sordaria_alcina	0	0	0	0	0	0	0	0	0	0	0	0	0	0	0	0	0	0	0	0	0	0	0	0	0	0	0	0	0	0	0	0	0	0	0	0	0	0	0	0	0	0
05d8691f875c8a84bb1442e7e344c00a	k__Fungi	p__Chytridiomycota	c__unidentified	o__unidentified	f__unidentified	g__unidentified	s__unidentified	0	0	0	0	0	0	0	0	0	0	0	0	0	0	0	0	0	0	0	0	0	0	0	0	0	0	0	0	0	0	0	0	0	0	0	0	0	0	0	0	0	0
05df3615481ba290cbb7340e0f28f8e1	k__Fungi	p__Basidiomycota	c__Tremellomycetes	o__Tremellales	f__Bulleribasidiaceae	g__Vishniacozyma	s__Vishniacozyma_carnescens	0	0	0	0	0	30	0	0	0	0	0	0	0	65	0	0	0	0	0	0	0	0	0	0	0	0	0	0	0	0	0	0	0	0	0	50	0	0	304	20	0	0
05e0895c992d66ca3ebeb17c1848a962	k__Fungi	p__Basidiomycota	c__unidentified	o__unidentified	f__unidentified	g__unidentified	s__unidentified	0	0	0	0	0	0	0	0	0	0	0	0	0	0	0	0	0	0	0	0	0	0	0	0	0	0	0	0	0	0	0	0	0	0	0	0	0	0	0	0	0	0
05e6f470fa91c49eb17746f2ab548cd2	k__Fungi	p__Chytridiomycota	c__unidentified	o__unidentified	f__unidentified	g__unidentified	s__unidentified	0	0	0	0	0	0	0	0	0	0	0	0	0	0	0	0	0	0	0	0	0	0	0	0	0	0	0	0	0	0	0	0	0	0	0	0	0	0	0	0	0	0
05e79d7b46f5e7ef9107a859e27711fa	k__Fungi	p__Basidiomycota	c__Tremellomycetes	o__Filobasidiales	f__Piskurozymaceae	g__Piskurozyma	s__unidentified	0	0	0	0	0	0	0	0	0	0	0	0	0	0	0	0	0	0	0	0	0	0	0	0	0	0	0	0	0	0	0	0	0	0	0	0	0	0	0	0	0	0
05e82aa7e477ce10adc35e72b851d0ce	k__Fungi	p__unidentified	c__unidentified	o__unidentified	f__unidentified	g__unidentified	s__unidentified	0	0	0	0	0	0	0	0	0	0	0	0	0	0	0	0	0	0	0	0	0	0	0	0	0	0	0	0	0	0	0	0	0	0	0	0	0	0	0	0	0	0
05e8d3217c4ff17c94f17f63d38c8906	k__Fungi	p__unidentified	c__unidentified	o__unidentified	f__unidentified	g__unidentified	s__unidentified	0	0	0	0	0	0	0	0	0	0	0	0	0	0	0	0	0	0	0	0	0	0	0	0	0	0	0	0	0	0	0	0	0	0	0	0	0	0	0	0	0	0
05eafd523762ed7543f857477734a4e9	k__Fungi	p__unidentified	c__unidentified	o__unidentified	f__unidentified	g__unidentified	s__unidentified	0	0	0	0	0	0	0	0	0	0	0	0	0	0	0	0	0	0	0	0	0	0	0	0	0	0	0	0	0	0	0	0	0	0	0	0	0	0	0	0	0	0
05ec7c20ceba571e68fcf391c28aae82	k__Fungi	p__Basidiomycota	c__Agaricostilbomycetes	o__Agaricostilbales	f__Chionosphaeraceae	g__Kurtzmanomyces	s__unidentified	0	0	0	0	0	0	0	0	0	0	0	0	0	0	0	0	0	0	0	0	0	0	0	0	0	0	0	0	0	0	0	0	0	0	0	0	0	0	0	0	0	0
05f2be3b2177ab4bbac07ad0d606f71e	k__Fungi	p__unidentified	c__unidentified	o__unidentified	f__unidentified	g__unidentified	s__unidentified	0	0	0	0	0	0	0	0	0	0	0	0	0	0	0	0	0	0	0	0	0	0	0	0	0	0	0	0	0	0	0	0	0	0	0	0	0	0	0	0	0	0
05f948efb285eda1ac6702a433c8d247	k__Fungi	p__Ascomycota	c__Eurotiomycetes	o__Chaetothyriales	f__Herpotrichiellaceae	g__Cladophialophora	s__Cladophialophora_minutissima	0	0	0	0	0	0	0	0	0	0	0	0	0	0	0	0	0	0	0	0	0	0	0	0	0	0	0	0	0	0	0	0	0	0	0	0	0	0	0	0	0	0
05f94fbaa6e7f08f2383621421b85d39	k__Fungi	p__Ascomycota	c__Leotiomycetes	o__Helotiales	f__unidentified	g__unidentified	s__unidentified	0	0	0	0	0	0	0	0	0	0	0	0	0	0	0	0	0	0	0	0	0	0	0	0	0	0	945	0	0	0	0	0	0	0	0	0	0	0	0	0	0	0
05f9a007bda5530542623811d06ee39f	k__Fungi	p__unidentified	c__unidentified	o__unidentified	f__unidentified	g__unidentified	s__unidentified	0	0	8	0	0	0	0	0	0	0	0	0	0	0	0	0	0	0	0	0	0	0	0	0	0	0	0	0	0	0	0	0	0	0	0	0	0	0	0	0	0	0
05fd6768da44c23fc9de939b05652d21	k__Fungi	p__unidentified	c__unidentified	o__unidentified	f__unidentified	g__unidentified	s__unidentified	0	0	0	0	0	0	0	0	0	0	0	0	0	0	5	0	0	0	0	0	0	0	0	0	0	0	0	0	0	0	0	0	0	0	0	0	0	0	0	0	0	0
060208c2c37b2cf9f1eb3cbb373ea4b1	k__Fungi	p__unidentified	c__unidentified	o__unidentified	f__unidentified	g__unidentified	s__unidentified	0	0	0	0	0	0	0	0	0	0	0	0	0	0	0	0	0	0	0	0	0	0	0	0	0	0	0	0	0	0	0	0	0	0	0	0	0	0	0	0	0	0
0602b72e5f44f7be4daf49f766613ec7	k__Fungi	p__unidentified	c__unidentified	o__unidentified	f__unidentified	g__unidentified	s__unidentified	0	0	0	0	0	0	0	0	0	0	0	0	0	0	0	0	0	0	0	0	0	0	0	0	0	0	0	0	0	0	0	0	0	0	0	0	0	0	0	0	0	0
0603e019be41b5c61f1d5dcb354942c3	k__Fungi	p__Ascomycota	c__unidentified	o__unidentified	f__unidentified	g__unidentified	s__unidentified	0	0	0	0	0	0	0	0	0	0	0	0	0	0	0	0	0	62	0	0	0	0	0	0	0	0	0	0	0	0	0	0	0	0	0	0	0	0	0	0	0	0
060667c71d9e332e285765c5d2cb483a	k__Fungi	p__Chytridiomycota	c__Rhizophydiomycetes	o__Rhizophydiales	f__Alphamycetaceae	g__Betamyces	s__unidentified	0	0	0	0	0	0	0	0	0	0	0	0	0	0	0	0	0	0	0	21	0	0	0	0	0	0	0	0	0	0	0	0	0	0	0	0	0	0	0	0	0	0
060eaf924b55cc916677e92e69b340da	k__Fungi	p__unidentified	c__unidentified	o__unidentified	f__unidentified	g__unidentified	s__unidentified	0	0	0	0	0	0	0	0	0	0	0	0	0	0	0	0	0	0	0	0	0	0	0	0	0	0	0	0	0	0	0	0	0	0	0	0	0	0	0	0	0	0
060f875126410fa7b59384794d83ace8	k__Fungi	p__unidentified	c__unidentified	o__unidentified	f__unidentified	g__unidentified	s__unidentified	0	0	0	0	0	0	0	4	0	0	0	0	0	0	0	0	0	0	0	0	0	0	0	0	0	0	0	0	0	0	0	0	0	0	0	0	0	0	0	0	0	0
0614b7a88ad0c057d29ddc7683fcacc9	k__Fungi	p__unidentified	c__unidentified	o__unidentified	f__unidentified	g__unidentified	s__unidentified	0	0	0	0	0	0	0	0	0	0	0	0	0	0	197	0	0	0	0	0	0	0	0	0	0	0	0	0	0	0	0	0	0	0	0	0	0	0	0	0	0	0
0616c86b20b5305d6d5c7bffbe5ff093	k__Fungi	p__Ascomycota	c__Dothideomycetes	o__Pleosporales	f__Pleosporaceae	g__Alternaria	s__Alternaria_tenuissima	0	0	0	0	0	0	0	0	0	0	0	0	0	0	0	0	0	0	0	0	0	0	0	0	0	0	0	0	0	0	0	0	0	0	0	0	0	0	0	0	0	0
061be2779b4a14e3929acddce093df68	k__Fungi	p__unidentified	c__unidentified	o__unidentified	f__unidentified	g__unidentified	s__unidentified	0	0	0	0	0	0	0	0	0	0	0	0	0	0	0	0	0	0	0	0	0	0	0	0	0	0	0	0	0	0	0	0	0	0	0	0	0	0	0	0	0	0
061e1647d53003cd9157dc108cd5a705	k__Fungi	p__unidentified	c__unidentified	o__unidentified	f__unidentified	g__unidentified	s__unidentified	0	0	0	0	0	0	0	0	0	0	0	0	0	0	0	0	0	0	0	0	0	0	0	0	0	0	0	0	0	0	0	0	0	0	0	0	0	0	0	0	0	0
061ff31acb68cdc8d071d59cf8e82910	k__Fungi	p__Ascomycota	c__Dothideomycetes	o__Capnodiales	f__Mycosphaerellaceae	g__Zymoseptoria	s__unidentified	0	0	0	0	0	0	0	0	0	0	0	0	0	0	0	0	0	0	0	0	0	0	0	0	0	0	0	0	0	0	0	0	0	0	0	0	0	0	0	0	0	0
062099156322a1e42e864f1eeb1744d3	k__Fungi	p__Ascomycota	c__Sordariomycetes	o__Hypocreales	f__Nectriaceae	g__Xenoacremonium	s__Xenoacremonium_falcatum	0	0	0	0	0	0	0	0	0	0	0	0	0	0	0	0	0	0	0	0	0	0	0	0	0	0	0	0	0	0	0	0	0	0	0	0	0	0	0	0	0	0
062c336a3ba02ee213c5ca19d296d16e	k__Fungi	p__unidentified	c__unidentified	o__unidentified	f__unidentified	g__unidentified	s__unidentified	0	0	0	0	0	0	0	0	0	0	0	0	0	0	0	0	0	0	0	0	0	0	0	0	0	0	0	0	0	0	0	0	0	0	0	0	0	0	0	0	0	0
062d5eee1270e2d569a74e3fdf7cfd4e	k__Fungi	p__unidentified	c__unidentified	o__unidentified	f__unidentified	g__unidentified	s__unidentified	0	0	0	0	0	0	0	0	0	0	0	0	0	0	0	0	0	0	0	0	0	0	0	0	0	0	0	0	0	0	0	0	0	0	0	0	0	0	0	0	0	0
062e5787db2bda13242c4d6eb11a93cf	k__Fungi	p__Ascomycota	c__Sordariomycetes	o__Hypocreales	f__Nectriaceae	g__unidentified	s__unidentified	0	0	0	0	0	0	0	0	0	0	0	0	0	0	0	0	0	0	0	0	0	0	0	0	0	0	0	0	0	0	0	0	0	0	0	0	0	0	0	0	0	0
0633783ef85ddd3987d000fc506a2714	k__Fungi	p__unidentified	c__unidentified	o__unidentified	f__unidentified	g__unidentified	s__unidentified	0	0	0	0	0	0	0	0	0	0	0	0	0	0	0	0	0	0	0	0	0	0	0	0	0	0	0	0	0	0	0	0	0	0	0	0	0	0	0	0	0	0
0633b7f509f5a74d17e1155a018d1161	k__Fungi	p__unidentified	c__unidentified	o__unidentified	f__unidentified	g__unidentified	s__unidentified	0	0	0	0	0	0	0	0	0	0	0	0	0	0	0	0	0	0	0	0	0	0	0	0	0	0	0	0	0	0	6	0	0	0	0	0	0	0	0	0	0	0
0633bfd74f9ff4e0811fa438c4f95374	k__Fungi	p__Ascomycota	c__Leotiomycetes	o__Helotiales	f__unidentified	g__unidentified	s__unidentified	0	0	0	0	0	0	0	0	0	0	0	0	0	0	0	0	0	0	0	0	0	0	0	0	0	0	0	0	0	0	0	0	0	0	0	0	0	0	0	0	0	0
0634038b780037a833b9816661a9267f	k__Fungi	p__unidentified	c__unidentified	o__unidentified	f__unidentified	g__unidentified	s__unidentified	0	0	0	0	0	0	0	0	0	0	0	0	0	0	0	0	0	0	0	0	0	0	0	0	0	0	0	0	0	0	0	0	0	0	0	0	0	0	0	0	0	0
063a68140ac66554cab141523b620726	k__Fungi	p__unidentified	c__unidentified	o__unidentified	f__unidentified	g__unidentified	s__unidentified	0	0	0	0	0	0	0	0	0	0	0	0	0	0	0	0	0	0	0	0	0	0	0	0	0	0	0	0	0	0	0	0	0	0	0	0	0	0	0	0	0	0
063d2bdd76df2bde5636a8614ec4be16	k__Fungi	p__Ascomycota	c__Leotiomycetes	o__Helotiales	f__unidentified	g__unidentified	s__unidentified	0	0	0	0	0	0	0	0	0	0	0	0	0	0	0	0	0	0	0	0	0	0	0	0	0	0	0	0	0	0	0	0	0	0	0	0	0	0	0	0	0	0
063e5bfac44c5fd37645890112e125a9	k__Fungi	p__unidentified	c__unidentified	o__unidentified	f__unidentified	g__unidentified	s__unidentified	0	0	0	0	0	0	0	0	0	0	0	0	0	0	0	0	0	0	0	0	0	0	0	0	0	0	0	0	0	0	0	0	0	0	0	0	0	0	0	0	0	0
063eeaeb709df155402bb449c0e3a3f5	k__Fungi	p__Rozellomycota	c__Rozellomycotina_cls_Incertae_sedis	o__Branch03	f__unidentified	g__unidentified	s__unidentified	0	0	0	0	0	0	0	0	0	0	0	0	0	0	16	0	0	0	0	0	0	0	0	0	0	0	0	0	0	0	0	0	0	0	0	0	0	0	0	0	0	0
063f8a2625459094731365d9ed573d58	k__Fungi	p__Rozellomycota	c__unidentified	o__unidentified	f__unidentified	g__unidentified	s__unidentified	0	0	0	3	0	0	0	0	0	0	0	0	0	0	0	0	0	0	0	0	0	0	0	0	0	0	0	0	0	0	0	0	0	0	0	0	0	0	0	0	0	0
0645a13b2d28729cef66ce46193973cd	k__Fungi	p__Ascomycota	c__Sordariomycetes	o__Hypocreales	f__Nectriaceae	g__Xenoacremonium	s__Xenoacremonium_falcatum	0	0	0	0	0	0	0	0	0	0	0	0	0	0	0	0	0	0	0	0	0	0	6291	0	0	0	0	0	0	0	0	0	0	0	0	0	0	0	0	0	0	0
06460f52eb0062391033bce48e90da23	k__Fungi	p__Ascomycota	c__Dothideomycetes	o__Capnodiales	f__Teratosphaeriaceae	g__Recurvomyces	s__unidentified	0	0	0	0	0	0	0	0	0	0	0	0	0	0	5	0	0	0	0	0	0	0	0	0	0	0	0	0	0	0	0	0	0	0	0	0	0	0	0	0	0	0
064de80adacc7c9c64fe63c923fac679	k__Fungi	p__unidentified	c__unidentified	o__unidentified	f__unidentified	g__unidentified	s__unidentified	0	0	0	0	0	0	0	0	0	0	3	0	0	0	0	0	0	0	0	0	0	0	0	0	0	0	0	0	0	0	0	0	0	0	0	0	0	0	0	0	0	0
064ff629fccfe7edbbb9cbc9bb7098d2	k__Fungi	p__unidentified	c__unidentified	o__unidentified	f__unidentified	g__unidentified	s__unidentified	0	0	0	0	0	0	0	0	0	0	0	0	0	0	0	0	0	0	0	0	0	0	0	0	0	0	0	0	0	0	0	0	0	0	0	0	0	0	0	0	0	0
06564930fef585e18013f4b6b808a49a	k__Fungi	p__Rozellomycota	c__unidentified	o__unidentified	f__unidentified	g__unidentified	s__unidentified	0	0	0	0	0	0	0	0	0	0	0	0	0	0	0	0	0	0	0	0	0	0	0	0	0	0	0	0	0	0	0	0	0	0	0	0	0	0	0	0	0	0
065ab6a5b4f4f1ba0138865dfe1e4c37	k__Fungi	p__unidentified	c__unidentified	o__unidentified	f__unidentified	g__unidentified	s__unidentified	0	0	0	0	0	0	0	0	0	0	0	0	0	0	0	0	0	0	0	0	0	0	0	0	0	0	0	0	0	0	0	0	0	0	0	0	0	0	0	0	0	0
065d3c053cb1177f6f1683269e2441b5	k__Fungi	p__unidentified	c__unidentified	o__unidentified	f__unidentified	g__unidentified	s__unidentified	0	0	0	0	0	0	0	0	0	0	0	0	0	0	0	0	0	0	0	0	0	0	0	0	0	0	0	0	0	0	0	0	0	0	0	0	0	0	0	0	0	0
065e48c42b79ff476de86501f9f01751	k__Fungi	p__unidentified	c__unidentified	o__unidentified	f__unidentified	g__unidentified	s__unidentified	0	0	0	0	0	0	0	0	0	0	0	0	0	0	0	0	0	0	0	0	0	0	0	0	0	0	0	0	0	0	0	0	0	0	0	0	0	0	0	0	0	0
0668d3e7ba74f32bb07b420dd21443f5	k__Fungi	p__Ascomycota	c__Eurotiomycetes	o__Chaetothyriales	f__unidentified	g__unidentified	s__unidentified	0	0	0	0	0	0	0	0	0	0	0	0	0	0	0	0	0	0	0	0	0	0	0	0	0	0	0	0	0	0	0	0	0	0	0	0	0	0	0	0	0	0
066919888a9044c0bbaab59bf1994c31	k__Fungi	p__unidentified	c__unidentified	o__unidentified	f__unidentified	g__unidentified	s__unidentified	0	0	0	0	0	0	0	0	0	0	0	0	0	0	0	0	0	0	0	0	0	0	0	0	0	0	0	0	0	0	0	0	0	0	0	0	0	0	0	0	0	0
066b58bee67d6ad7ac8b4bad5bcba4cf	k__Fungi	p__unidentified	c__unidentified	o__unidentified	f__unidentified	g__unidentified	s__unidentified	0	0	0	0	0	0	0	0	0	0	0	0	0	0	0	0	0	0	0	0	0	0	0	0	0	0	0	0	0	0	0	0	0	0	0	0	0	0	0	0	0	0
066bacf085e38dd6538a33516c8bc8db	k__Fungi	p__Ascomycota	c__unidentified	o__unidentified	f__unidentified	g__unidentified	s__unidentified	0	0	0	0	0	0	0	0	0	0	0	0	0	0	0	0	0	0	0	0	0	0	0	0	0	0	0	0	0	0	0	0	0	0	0	0	0	0	0	0	0	0
066c0b9a3f37f723ccfd15554a4a73a7	k__Fungi	p__Chytridiomycota	c__unidentified	o__unidentified	f__unidentified	g__unidentified	s__unidentified	0	0	0	0	0	0	0	0	0	0	0	0	0	0	0	0	0	0	0	0	0	0	0	0	0	0	0	0	0	0	0	0	0	0	0	0	0	0	0	0	0	0
066debf8e09380163693103c1e39f599	k__Fungi	p__unidentified	c__unidentified	o__unidentified	f__unidentified	g__unidentified	s__unidentified	0	0	0	0	0	0	0	0	0	0	0	0	0	0	0	0	0	0	0	0	0	0	0	0	0	0	0	0	0	0	0	0	0	0	0	0	0	0	0	0	0	0
06701200dd7e21998d89ceb7f3c2948f	k__Fungi	p__unidentified	c__unidentified	o__unidentified	f__unidentified	g__unidentified	s__unidentified	0	0	0	0	0	0	0	0	0	0	0	0	0	0	0	0	0	0	0	0	0	0	0	0	0	0	0	0	0	0	0	0	0	0	0	0	0	0	0	0	0	0
067288dea558176a594db594c617cbc0	k__Fungi	p__Basidiomycota	c__unidentified	o__unidentified	f__unidentified	g__unidentified	s__unidentified	0	0	0	0	0	0	0	0	0	0	0	0	0	0	0	0	0	0	0	0	0	0	0	0	0	0	0	0	0	0	0	0	0	42	0	0	0	0	0	0	0	0
0677d6c34ba644eb1e7f4410b85e43c8	k__Fungi	p__unidentified	c__unidentified	o__unidentified	f__unidentified	g__unidentified	s__unidentified	0	0	0	0	0	0	0	0	0	0	0	0	0	0	433	0	0	0	0	0	0	0	0	0	0	0	0	0	0	0	0	0	0	0	0	0	0	0	0	0	0	0
067c2bba91f284942184a4a26b3e6391	k__Fungi	p__unidentified	c__unidentified	o__unidentified	f__unidentified	g__unidentified	s__unidentified	0	0	0	0	0	0	0	0	0	0	0	0	0	0	0	0	0	0	0	0	0	0	0	0	0	0	0	0	0	0	0	0	0	0	0	0	0	0	0	0	0	0
06803d0db8dee67ea6c38c3ff3f02ddf	k__Fungi	p__unidentified	c__unidentified	o__unidentified	f__unidentified	g__unidentified	s__unidentified	0	0	0	0	0	0	0	0	0	0	0	0	0	0	0	0	0	0	0	0	0	0	0	0	0	0	0	0	0	0	0	0	0	0	0	0	0	0	0	0	0	0
06855b8c87918348a972dd6076aa2f4e	k__Fungi	p__Basidiomycota	c__Microbotryomycetes	o__Sporidiobolales	f__Sporidiobolaceae	g__Rhodotorula	s__unidentified	0	0	0	0	0	0	0	0	0	0	0	0	0	0	0	0	0	0	0	0	0	0	0	0	0	0	0	0	0	0	0	0	0	0	0	0	0	0	0	0	0	0
0688b7cf8e1c191fa3db1bc2b7e10a1c	k__Fungi	p__unidentified	c__unidentified	o__unidentified	f__unidentified	g__unidentified	s__unidentified	0	0	0	0	0	0	0	0	0	0	0	0	0	0	0	0	0	0	0	0	0	0	0	0	0	0	0	0	0	0	0	0	0	0	0	0	0	0	0	0	0	0
069261264d470b36bd69c818317fbd4e	k__Fungi	p__unidentified	c__unidentified	o__unidentified	f__unidentified	g__unidentified	s__unidentified	0	0	0	0	0	0	0	0	0	0	0	0	0	0	0	0	0	0	0	0	0	0	0	0	0	0	4	0	0	0	0	0	0	0	0	0	0	0	0	0	0	0
069f489855ea568bd3ef7e7e6011c778	k__Fungi	p__Chytridiomycota	c__unidentified	o__unidentified	f__unidentified	g__unidentified	s__unidentified	0	0	0	0	0	0	0	0	0	0	0	0	0	0	0	0	0	0	0	0	0	0	0	0	0	0	0	0	0	0	0	0	0	0	0	0	0	0	0	0	0	0
06a7ddb83b116d86a2d177d321a79e14	k__Fungi	p__Chytridiomycota	c__Rhizophydiomycetes	o__Rhizophydiales	f__unidentified	g__unidentified	s__unidentified	0	0	0	0	0	0	0	0	0	0	0	0	0	0	0	0	0	0	0	0	0	0	0	0	0	0	0	0	0	0	0	0	0	0	0	0	0	0	0	0	0	0
06ac67e0119db51143af616c06afb37f	k__Fungi	p__unidentified	c__unidentified	o__unidentified	f__unidentified	g__unidentified	s__unidentified	0	0	0	0	0	0	0	0	0	0	0	0	0	0	0	0	0	0	0	0	0	0	0	0	0	0	0	0	0	0	0	0	0	0	0	0	0	0	0	0	0	0
06b22d606c6eb58e93e832b6f03bc6c4	k__Fungi	p__unidentified	c__unidentified	o__unidentified	f__unidentified	g__unidentified	s__unidentified	0	0	0	0	0	0	0	0	0	0	0	0	0	0	0	0	0	0	0	0	0	0	0	0	0	0	0	0	0	0	0	0	0	0	0	0	0	0	0	0	0	0
06b3776f861b11280e28460346924d59	k__Fungi	p__unidentified	c__unidentified	o__unidentified	f__unidentified	g__unidentified	s__unidentified	0	0	0	0	0	0	0	0	0	0	0	0	0	0	0	0	0	0	0	0	0	0	0	0	0	0	0	0	0	0	0	0	0	0	0	0	0	0	0	0	0	0
06b749bb7af4f6ed805eeede2f195288	k__Fungi	p__unidentified	c__unidentified	o__unidentified	f__unidentified	g__unidentified	s__unidentified	0	0	0	0	0	0	0	0	0	0	0	0	0	0	0	0	0	0	0	0	0	0	0	0	0	0	0	0	0	0	0	0	0	0	0	0	0	0	0	0	0	0
06bdc21d7c3577fe6ae6b10fa019abba	k__Fungi	p__unidentified	c__unidentified	o__unidentified	f__unidentified	g__unidentified	s__unidentified	0	0	0	0	0	0	0	0	0	0	0	0	0	0	0	0	0	0	0	0	0	0	0	0	0	0	0	127	0	0	0	0	0	0	0	0	0	0	0	0	0	0
06c4a24506d41f840053361983dddd1d	k__Fungi	p__unidentified	c__unidentified	o__unidentified	f__unidentified	g__unidentified	s__unidentified	0	0	0	0	0	0	0	0	0	0	0	0	0	0	0	0	0	0	0	0	0	0	0	0	0	0	0	0	0	0	0	0	0	0	0	0	0	0	0	0	0	0
06cd7856de8a28ee6a5930158705afa9	k__Fungi	p__Ascomycota	c__unidentified	o__unidentified	f__unidentified	g__unidentified	s__unidentified	0	0	0	0	0	0	0	0	0	0	0	0	0	0	0	0	0	0	0	0	0	0	0	0	0	0	0	0	0	0	0	0	0	0	0	0	0	0	0	0	0	0
06ce044067a366bd1bff77b37cba05ca	k__Fungi	p__unidentified	c__unidentified	o__unidentified	f__unidentified	g__unidentified	s__unidentified	0	0	0	0	0	0	0	0	0	0	0	0	0	0	0	0	0	0	0	0	0	0	0	0	0	0	0	0	0	0	0	0	0	0	0	0	0	0	0	0	0	0
06ce9bedab6452149ca97700c85f3c7b	k__Fungi	p__unidentified	c__unidentified	o__unidentified	f__unidentified	g__unidentified	s__unidentified	0	0	0	0	0	0	0	0	0	0	0	0	0	0	0	0	0	0	0	0	0	0	0	0	0	0	0	0	0	0	0	0	0	0	0	0	0	0	0	0	0	0
06cf57a1e262bf3db8e55c5794e3610a	k__Fungi	p__Ascomycota	c__Eurotiomycetes	o__Eurotiales	f__Aspergillaceae	g__Penicillium	s__Penicillium_citrinum	0	0	0	0	0	0	0	0	0	0	0	0	0	0	0	0	0	0	0	0	0	0	0	0	0	0	0	0	0	0	0	0	0	0	0	0	0	0	0	0	0	0
06d4f9fe66c137a4055e5118b1ad94a7	k__Fungi	p__Ascomycota	c__Leotiomycetes	o__Helotiales	f__unidentified	g__unidentified	s__unidentified	0	0	0	0	0	0	0	0	0	0	0	0	0	0	0	0	0	0	0	0	0	0	0	0	0	0	0	0	0	0	0	0	0	0	0	0	0	0	0	0	0	0
06d6f1e75fe62ebbab408dd9b16f43a4	k__Fungi	p__unidentified	c__unidentified	o__unidentified	f__unidentified	g__unidentified	s__unidentified	0	0	0	0	0	0	0	0	0	0	0	0	0	0	0	0	0	0	0	0	0	0	0	0	0	0	0	0	0	0	0	0	0	0	0	0	0	0	0	0	0	0
06dadd17dc5e25fbdd62bba75de57d9e	k__Fungi	p__unidentified	c__unidentified	o__unidentified	f__unidentified	g__unidentified	s__unidentified	0	0	0	0	0	0	0	0	0	0	0	0	0	0	0	0	0	0	0	0	0	0	0	0	0	0	0	0	0	0	0	0	0	0	0	0	0	0	0	0	0	0
06e00234ceb07e12c3d202a47211633e	k__Fungi	p__unidentified	c__unidentified	o__unidentified	f__unidentified	g__unidentified	s__unidentified	0	0	0	0	0	0	0	0	0	0	0	0	0	0	0	0	0	0	0	0	0	0	0	0	0	0	0	0	0	0	0	0	0	0	0	0	0	0	0	0	0	0
06e25655224bf9dc55b1bf7d7838cedb	k__Fungi	p__unidentified	c__unidentified	o__unidentified	f__unidentified	g__unidentified	s__unidentified	0	0	0	0	0	0	0	0	0	0	0	0	0	0	0	0	0	0	0	0	0	0	0	0	0	0	0	0	0	0	0	0	0	0	0	0	0	0	0	0	0	0
06e398234988c16b25cbb5e1170cedc0	k__Fungi	p__Ascomycota	c__Eurotiomycetes	o__Eurotiales	f__Aspergillaceae	g__Penicillium	s__unidentified	0	0	0	89	0	0	0	0	0	0	82	0	0	0	0	0	0	0	0	0	0	0	0	0	0	0	0	0	40	0	0	0	0	0	0	0	0	0	0	0	0	52
06e3cfb50cfd4c9124b32aba4410e97b	k__Fungi	p__Basidiomycota	c__Tremellomycetes	o__Tremellales	f__Bulleribasidiaceae	g__Vishniacozyma	s__unidentified	0	0	0	0	0	0	0	0	0	0	6	0	0	0	0	0	0	0	0	0	0	0	0	0	0	0	0	0	0	0	0	0	0	0	0	0	0	0	0	0	0	0
06e7862e5d198c6fb400709b88b064ad	k__Fungi	p__unidentified	c__unidentified	o__unidentified	f__unidentified	g__unidentified	s__unidentified	0	0	0	0	0	0	0	0	0	0	0	0	0	0	0	0	0	0	0	0	0	0	0	0	0	0	0	0	0	0	0	0	0	0	0	0	0	0	0	0	0	0
06eda4f86df80dca1988f69b528e4545	k__Fungi	p__unidentified	c__unidentified	o__unidentified	f__unidentified	g__unidentified	s__unidentified	0	0	0	0	11461	0	0	0	11882	0	0	7936	0	0	0	0	0	0	0	0	0	0	0	0	0	0	0	0	0	0	0	0	540	0	0	0	13705	0	0	0	7277	0
06ef7f8c6b49da52b54e38ee6e9e3443	k__Fungi	p__unidentified	c__unidentified	o__unidentified	f__unidentified	g__unidentified	s__unidentified	0	0	0	0	0	0	0	0	0	0	0	0	0	0	0	0	0	0	0	0	0	0	0	0	0	0	0	0	0	0	0	0	0	0	0	0	0	0	0	0	0	0
06f5116049388ad55555288142d1c6e9	k__Fungi	p__unidentified	c__unidentified	o__unidentified	f__unidentified	g__unidentified	s__unidentified	0	0	0	0	0	0	0	0	0	0	0	0	0	0	0	0	0	0	0	0	0	0	0	0	0	0	0	0	0	0	0	0	0	0	0	0	0	0	0	0	0	0
06f8a7d42cf75aafa04ee19d2d8a0d02	k__Fungi	p__unidentified	c__unidentified	o__unidentified	f__unidentified	g__unidentified	s__unidentified	0	0	0	0	0	0	0	0	0	0	0	0	0	0	0	0	0	0	0	0	0	0	0	0	0	0	0	0	0	0	0	0	0	0	0	0	0	0	0	0	0	0
06fa0d3509feade48c24f7343f8874d1	k__Fungi	p__Rozellomycota	c__unidentified	o__unidentified	f__unidentified	g__unidentified	s__unidentified	0	0	0	0	0	0	0	0	0	0	0	0	0	0	0	0	0	0	0	0	0	0	0	0	0	0	0	0	0	0	0	0	0	0	0	0	0	0	0	0	0	0
06fef3f60e4b331e594e0dfb0212c9d2	k__Fungi	p__unidentified	c__unidentified	o__unidentified	f__unidentified	g__unidentified	s__unidentified	0	0	0	0	0	0	0	0	0	0	0	0	0	0	0	0	0	0	0	0	0	0	0	0	0	0	0	0	0	0	0	0	0	0	0	0	0	0	0	0	0	0
07005a29e6e4dcfa31ffaac143d74e10	k__Fungi	p__unidentified	c__unidentified	o__unidentified	f__unidentified	g__unidentified	s__unidentified	0	0	0	0	0	0	0	0	0	0	0	63	0	0	0	0	0	0	0	0	0	0	0	0	0	0	0	0	0	0	0	0	0	0	0	0	0	0	0	0	0	0
0703bd5f22a4ad1c0340a62f24fb28bd	k__Fungi	p__Ascomycota	c__Leotiomycetes	o__Helotiales	f__Hyaloscyphaceae	g__Calycina	s__unidentified	0	0	0	0	0	0	0	0	0	0	0	0	0	0	0	0	0	0	0	0	0	0	0	0	0	0	0	0	0	0	0	0	0	0	0	0	0	0	0	0	0	0
0707a6fd5d859baa254b8fae96f6c0b0	k__Fungi	p__Ascomycota	c__Dothideomycetes	o__Capnodiales	f__Teratosphaeriaceae	g__unidentified	s__unidentified	0	0	0	0	0	0	0	0	0	0	0	0	0	0	0	0	0	0	0	0	0	0	0	0	0	0	0	0	0	0	0	0	0	0	0	0	0	0	0	0	0	0
070a0cc0f69167409f0c04042c01be7e	k__Fungi	p__Basidiomycota	c__unidentified	o__unidentified	f__unidentified	g__unidentified	s__unidentified	0	0	0	0	0	0	0	0	0	0	0	0	0	0	0	0	0	0	0	0	0	0	0	0	0	0	0	0	0	0	0	0	0	0	0	0	0	0	0	0	0	0
070a6a0c53edd8c0413abbe849d30b92	k__Fungi	p__unidentified	c__unidentified	o__unidentified	f__unidentified	g__unidentified	s__unidentified	0	0	0	0	0	0	0	0	0	0	0	0	0	0	0	0	0	0	0	0	0	0	0	0	0	0	0	0	0	0	0	0	0	0	0	6	0	0	3	0	0	0
0714fd91ce93853cb8ba0f7c8b6dd493	k__Fungi	p__Ascomycota	c__Sordariomycetes	o__Hypocreales	f__Nectriaceae	g__Xenoacremonium	s__Xenoacremonium_falcatum	0	0	0	0	0	0	0	0	0	0	0	0	0	0	0	0	0	0	0	0	0	0	0	0	0	0	0	0	0	0	0	0	0	0	0	0	0	0	0	0	0	0
0717288df3cdf323c53b1038c7b206e1	k__Fungi	p__unidentified	c__unidentified	o__unidentified	f__unidentified	g__unidentified	s__unidentified	0	0	0	0	0	0	0	0	0	0	0	0	0	0	0	0	0	0	0	0	0	0	0	0	0	0	0	0	0	0	0	0	0	0	0	0	0	0	0	0	0	0
071b53818d18f8266dbed59f20817db1	k__Fungi	p__unidentified	c__unidentified	o__unidentified	f__unidentified	g__unidentified	s__unidentified	0	0	0	0	0	0	0	0	0	0	0	0	0	0	0	0	0	0	0	0	0	0	0	0	0	0	0	0	0	0	0	0	0	0	0	0	0	0	0	0	0	0
0723d95e0d08e3bf10d64c900ac16f42	k__Fungi	p__unidentified	c__unidentified	o__unidentified	f__unidentified	g__unidentified	s__unidentified	0	0	0	0	0	0	0	0	0	0	0	0	0	0	0	0	0	0	0	0	0	0	0	0	0	0	0	0	0	0	0	0	0	0	0	0	0	0	0	0	0	0
07241800325e0b8770a9ae530d4887f1	k__Fungi	p__Ascomycota	c__Eurotiomycetes	o__Chaetothyriales	f__Herpotrichiellaceae	g__Cladophialophora	s__Cladophialophora_minutissima	0	0	0	0	0	0	0	0	0	0	0	0	0	0	0	0	0	0	0	0	0	0	0	0	0	0	0	0	0	0	0	0	0	0	0	0	0	0	0	0	0	0
0725dcaacdea1bfd63713a8509b46964	k__Fungi	p__unidentified	c__unidentified	o__unidentified	f__unidentified	g__unidentified	s__unidentified	0	0	0	0	0	0	0	0	0	0	0	0	0	0	0	0	0	0	0	0	0	0	0	0	0	0	0	0	0	0	0	0	0	19	0	0	0	0	0	0	0	0
072b06445a1d9beae375eccccf168d79	k__Fungi	p__unidentified	c__unidentified	o__unidentified	f__unidentified	g__unidentified	s__unidentified	0	0	0	0	0	0	0	0	0	0	0	0	0	0	0	0	0	0	0	0	0	0	0	0	0	0	0	0	0	0	0	0	0	0	0	0	0	0	0	0	0	0
072ec693f091afaf9942d1c1b4a4dad6	k__Fungi	p__unidentified	c__unidentified	o__unidentified	f__unidentified	g__unidentified	s__unidentified	0	0	0	0	0	0	0	0	0	0	0	0	0	0	0	0	0	0	0	0	0	0	0	0	0	0	0	0	0	0	0	0	0	0	0	0	0	0	0	0	0	0
072f160cca8a889ff210b8e0fee1ef0c	k__Fungi	p__unidentified	c__unidentified	o__unidentified	f__unidentified	g__unidentified	s__unidentified	0	0	0	0	0	0	0	0	0	0	0	0	0	0	0	0	0	0	0	0	0	0	0	0	0	0	0	0	0	0	3	0	0	0	0	0	0	0	0	0	0	0
0732314ba8ab08ede715281a1e354db6	k__Fungi	p__unidentified	c__unidentified	o__unidentified	f__unidentified	g__unidentified	s__unidentified	0	3	0	0	0	0	0	0	0	0	0	0	0	0	0	0	0	0	0	0	0	0	0	0	0	0	0	0	0	0	0	0	0	0	0	0	0	0	0	0	0	0
0734ef85e8cabe072c3c88f5a0e7336a	k__Fungi	p__unidentified	c__unidentified	o__unidentified	f__unidentified	g__unidentified	s__unidentified	0	0	0	0	0	0	0	0	0	0	0	0	0	0	0	0	0	0	0	0	0	0	0	0	0	0	0	0	0	0	0	0	0	0	0	0	0	0	3	0	0	0
073a3263884be3547fee23eba2dcb9ba	k__Fungi	p__Chytridiomycota	c__unidentified	o__unidentified	f__unidentified	g__unidentified	s__unidentified	0	0	0	0	0	0	0	0	0	0	0	0	0	0	0	0	0	0	0	0	0	0	0	0	0	0	0	0	0	0	0	0	0	0	0	0	0	0	0	0	0	0
073b945228144de745aec553ca2bd4a3	k__Fungi	p__unidentified	c__unidentified	o__unidentified	f__unidentified	g__unidentified	s__unidentified	0	0	0	0	0	0	0	0	0	0	0	0	0	0	0	0	0	0	0	0	0	0	0	0	0	0	0	0	0	0	0	0	0	0	0	0	0	0	0	0	0	0
07438020e699af83cc86a2fd369e2ed5	k__Fungi	p__Chytridiomycota	c__unidentified	o__unidentified	f__unidentified	g__unidentified	s__unidentified	0	0	0	0	0	0	0	0	0	0	0	0	0	0	0	0	0	0	0	0	0	0	0	0	0	0	0	0	0	0	0	0	0	0	0	0	0	0	0	0	0	0
07443e4f42f3a63cb5d21f14f2ee97d9	k__Fungi	p__unidentified	c__unidentified	o__unidentified	f__unidentified	g__unidentified	s__unidentified	0	0	0	0	0	0	0	0	0	0	0	0	0	0	0	0	0	0	0	0	0	0	0	0	0	0	0	0	0	0	0	0	0	0	0	0	0	0	0	0	0	0
074640ce293af3fcedc9fde9c9572ee0	k__Fungi	p__unidentified	c__unidentified	o__unidentified	f__unidentified	g__unidentified	s__unidentified	0	0	0	0	0	0	0	0	0	0	0	0	0	0	0	0	0	0	0	0	0	0	0	0	0	0	0	0	0	0	0	0	0	0	0	0	0	0	0	0	0	0
074ebb35b823c99a5228ab796ec22005	k__Fungi	p__Basidiomycota	c__Microbotryomycetes	o__Leucosporidiales	f__Leucosporidiaceae	g__Leucosporidium	s__unidentified	0	0	0	0	0	0	0	0	0	0	0	0	0	0	0	0	0	0	0	0	0	0	0	0	0	0	0	0	0	0	0	0	0	0	0	0	0	0	0	0	0	0
074f1af8a40ff48bc9d629fb1831c9b2	k__Fungi	p__Basidiomycota	c__Microbotryomycetes	o__Sporidiobolales	f__Sporidiobolaceae	g__Rhodotorula	s__unidentified	0	0	0	0	0	0	0	0	0	0	0	0	0	0	0	0	0	0	0	0	0	0	0	0	0	0	0	0	0	0	0	0	0	0	0	0	0	0	0	0	0	0
074faf24bcaf6e22f2bdeabf0e89abb5	k__Fungi	p__unidentified	c__unidentified	o__unidentified	f__unidentified	g__unidentified	s__unidentified	0	0	0	0	0	0	0	0	0	0	0	12	0	0	0	0	0	0	0	0	0	0	0	0	0	0	0	0	0	0	0	0	0	0	0	0	0	0	0	0	0	0
07514ca7129816d1332db71615efdff7	k__Fungi	p__unidentified	c__unidentified	o__unidentified	f__unidentified	g__unidentified	s__unidentified	0	0	21	0	0	0	0	0	0	0	0	0	0	0	0	0	0	0	0	0	0	0	0	0	0	0	0	0	0	0	0	0	0	0	0	0	0	0	0	0	0	0
0751a36d9498c4f864851c74ac07db4f	k__Fungi	p__Chytridiomycota	c__Lobulomycetes	o__Lobulomycetales	f__unidentified	g__unidentified	s__unidentified	0	0	0	0	0	0	0	0	0	0	0	0	0	0	0	0	0	0	0	0	0	0	0	0	0	0	0	0	0	0	0	0	0	0	0	0	0	0	0	0	0	0
0754fc9049fcd242c112e919f9d380e9	k__Fungi	p__unidentified	c__unidentified	o__unidentified	f__unidentified	g__unidentified	s__unidentified	0	0	0	0	0	0	0	0	0	0	0	0	0	0	0	0	0	0	0	0	0	0	0	0	0	0	0	0	0	0	0	0	0	0	0	0	0	0	0	0	0	0
0754ff8239f4f3dc8fb88bc116e108ba	k__Fungi	p__Ascomycota	c__Leotiomycetes	o__Helotiales	f__Chaetomellaceae	g__Pilidium	s__unidentified	0	0	0	0	0	0	0	0	0	0	0	0	0	0	0	0	0	0	0	0	0	0	0	0	0	0	0	0	0	0	0	0	0	0	0	0	0	0	0	0	0	0
075592033776baafeac0e8f34aafa4d4	k__Fungi	p__unidentified	c__unidentified	o__unidentified	f__unidentified	g__unidentified	s__unidentified	0	0	0	0	0	0	0	0	0	0	0	0	0	0	0	0	0	0	0	0	0	0	0	0	0	0	0	0	0	0	0	0	0	0	0	0	0	0	0	0	0	0
07578699d295f01d6558c3d3fbed416b	k__Fungi	p__unidentified	c__unidentified	o__unidentified	f__unidentified	g__unidentified	s__unidentified	0	0	0	0	0	0	0	0	0	0	0	0	0	0	0	0	0	0	0	0	0	0	0	0	0	0	0	0	0	0	0	0	0	0	0	0	0	0	0	0	0	0
0759ca2b9f8d75e67dcc5dec9efc1c71	k__Fungi	p__unidentified	c__unidentified	o__unidentified	f__unidentified	g__unidentified	s__unidentified	0	0	0	0	0	0	0	0	0	0	0	0	0	0	0	0	0	0	0	0	0	0	0	0	0	0	0	0	0	0	0	0	0	0	0	0	0	0	0	0	0	0
075beb19a688fdf8acce238cb037923a	k__Fungi	p__unidentified	c__unidentified	o__unidentified	f__unidentified	g__unidentified	s__unidentified	0	0	0	0	0	0	0	0	0	0	0	0	0	0	0	0	0	0	0	0	0	0	0	0	0	0	0	0	0	0	0	0	0	0	0	0	0	0	0	0	0	0
0762c1141c2886ecf16005e1635f08cf	k__Fungi	p__Ascomycota	c__unidentified	o__unidentified	f__unidentified	g__unidentified	s__unidentified	0	0	0	0	0	0	0	0	0	0	0	0	0	0	0	0	0	0	0	0	0	0	0	0	0	0	0	0	0	0	0	0	0	0	0	0	0	0	0	0	0	0
0764eb0dcbc3676353f4945dae4af333	k__Fungi	p__unidentified	c__unidentified	o__unidentified	f__unidentified	g__unidentified	s__unidentified	0	0	0	0	0	0	0	0	0	0	0	0	0	0	0	0	0	0	0	0	0	0	0	0	0	0	0	0	0	0	0	0	0	0	0	0	0	0	0	0	0	0
076621f111c77de115c0acca9711e999	k__Fungi	p__Ascomycota	c__Sordariomycetes	o__Hypocreales	f__Hypocreales_fam_Incertae_sedis	g__Acremonium	s__Acremonium_biseptum	0	0	0	0	0	0	0	0	0	0	0	0	0	0	0	0	0	0	0	0	0	0	0	0	0	0	0	0	0	0	0	0	0	0	0	0	0	0	0	0	0	0
0767102551771bf95f55927fb0c10f9e	k__Fungi	p__unidentified	c__unidentified	o__unidentified	f__unidentified	g__unidentified	s__unidentified	0	0	0	0	0	0	0	0	0	0	0	0	0	0	0	0	0	0	0	0	0	0	0	0	0	0	0	0	0	0	0	0	0	0	0	0	0	0	0	0	0	0
07743e1227a4b037151421afb9085cfe	k__Fungi	p__Ascomycota	c__Leotiomycetes	o__Helotiales	f__unidentified	g__unidentified	s__unidentified	0	0	0	0	0	0	0	0	0	0	0	0	0	0	0	0	0	0	0	0	0	0	0	0	0	0	0	0	0	0	0	0	0	0	0	0	0	0	0	0	0	0
0774b523e89249001ca0e6ccb324650a	k__Fungi	p__unidentified	c__unidentified	o__unidentified	f__unidentified	g__unidentified	s__unidentified	0	0	0	0	0	0	0	0	0	0	0	0	0	0	0	0	0	0	0	0	0	0	0	0	0	0	0	0	0	0	0	0	0	0	0	0	0	0	0	0	0	0
0776c88a2ab4c0b01251d3c5669b9ba6	k__Fungi	p__unidentified	c__unidentified	o__unidentified	f__unidentified	g__unidentified	s__unidentified	0	0	0	0	0	0	0	0	0	0	0	0	0	0	0	0	0	0	0	0	0	0	0	0	0	0	0	0	0	0	0	0	0	0	0	0	0	0	0	0	0	0
077b3ee27d2230afbcb16c6ea0cc8173	k__Fungi	p__unidentified	c__unidentified	o__unidentified	f__unidentified	g__unidentified	s__unidentified	0	0	0	0	0	0	0	0	0	0	42	0	0	0	0	0	0	0	0	0	0	0	0	0	0	0	0	0	0	0	0	0	0	0	0	0	0	0	0	0	0	0
077f02b4b9abf9520d744f50490231de	k__Fungi	p__Rozellomycota	c__unidentified	o__unidentified	f__unidentified	g__unidentified	s__unidentified	0	0	0	0	0	0	0	0	0	0	0	0	0	0	0	0	0	0	0	0	0	0	0	0	0	0	0	0	0	0	0	0	0	0	0	0	0	0	0	0	0	0
077f9036778e6d817afb5450cd92d2d9	k__Fungi	p__unidentified	c__unidentified	o__unidentified	f__unidentified	g__unidentified	s__unidentified	0	0	0	0	0	0	0	0	0	0	0	0	0	0	0	0	0	0	0	0	0	0	0	0	0	0	0	0	0	0	0	0	0	0	0	0	0	0	0	0	0	0
0783274a53456678f32839f1ff0455cb	k__Fungi	p__Chytridiomycota	c__unidentified	o__unidentified	f__unidentified	g__unidentified	s__unidentified	0	0	0	0	0	0	0	0	0	0	0	0	0	0	0	0	0	0	0	0	0	0	0	0	0	0	0	0	0	0	0	0	0	0	0	0	0	0	0	0	0	0
07853ab2ad355889fb603525b9f13258	k__Fungi	p__Basidiomycota	c__Tremellomycetes	o__Cystofilobasidiales	f__Mrakiaceae	g__Tausonia	s__Tausonia_pullulans	0	0	0	0	0	0	0	0	0	0	0	0	0	0	0	0	0	0	0	0	0	0	0	0	0	0	0	0	0	0	0	0	0	0	0	0	0	0	0	0	0	0
0788da98d9cd67d534e1438431aeecf8	k__Fungi	p__unidentified	c__unidentified	o__unidentified	f__unidentified	g__unidentified	s__unidentified	0	0	0	0	0	0	0	0	0	0	0	0	0	0	0	0	0	0	0	0	0	0	0	0	0	0	0	0	0	0	0	0	0	0	0	0	0	0	0	0	0	0
07926907670ad35790a33b11eae70404	k__Fungi	p__unidentified	c__unidentified	o__unidentified	f__unidentified	g__unidentified	s__unidentified	0	0	0	0	0	0	0	0	24	0	0	0	0	0	0	0	0	0	0	0	0	0	0	0	0	0	0	0	0	0	0	0	0	0	0	0	0	0	0	0	0	0
0794bf8d5a9c9c9c213ccade50c8db7c	k__Fungi	p__Chytridiomycota	c__Lobulomycetes	o__unidentified	f__unidentified	g__unidentified	s__unidentified	0	0	0	0	0	0	0	0	0	0	0	0	0	0	0	0	0	0	0	0	0	0	0	0	0	0	0	0	0	0	0	0	0	0	0	0	0	0	0	0	0	0
0797bc4ed30b7a3cc76a00e9184f2297	k__Fungi	p__unidentified	c__unidentified	o__unidentified	f__unidentified	g__unidentified	s__unidentified	0	0	0	0	0	0	0	0	0	0	0	0	0	0	0	0	0	0	0	0	0	0	0	0	0	0	0	0	0	0	0	0	0	0	0	0	0	0	0	0	0	0
0798ee2c61c27466f149b1e7c5d3bb01	k__Fungi	p__unidentified	c__unidentified	o__unidentified	f__unidentified	g__unidentified	s__unidentified	0	0	0	0	0	0	0	0	0	0	0	0	0	0	0	0	0	0	0	0	0	0	0	0	0	0	0	56	0	0	0	0	0	0	0	0	0	0	0	0	0	0
079bfce2417d5ca2ecb36fc7c9cdc849	k__Fungi	p__unidentified	c__unidentified	o__unidentified	f__unidentified	g__unidentified	s__unidentified	0	0	0	0	0	0	0	0	0	0	0	0	0	0	0	0	0	0	0	0	0	0	0	0	0	0	0	0	0	0	0	0	0	0	0	0	0	0	0	0	0	0
07ac28032fbd18edafb444d6ccd0055f	k__Fungi	p__unidentified	c__unidentified	o__unidentified	f__unidentified	g__unidentified	s__unidentified	0	0	0	0	0	0	0	0	0	0	0	0	0	0	0	0	0	0	0	0	0	0	0	0	0	0	0	0	0	0	0	0	0	0	0	0	0	0	0	0	0	0
07ac97b927c886117b869db30df04fd0	k__Fungi	p__unidentified	c__unidentified	o__unidentified	f__unidentified	g__unidentified	s__unidentified	0	0	0	0	0	0	0	0	0	0	0	0	0	0	0	0	0	0	0	0	0	0	0	0	0	0	0	0	0	0	0	0	0	0	0	0	0	0	0	0	0	0
07af6580a7206456e6caed088bd4b22c	k__Fungi	p__Ascomycota	c__unidentified	o__unidentified	f__unidentified	g__unidentified	s__unidentified	0	0	0	0	0	0	0	0	0	0	0	0	0	0	0	0	0	0	0	0	0	0	0	0	0	0	0	0	0	0	0	0	0	0	0	0	0	0	0	0	0	0
07b0f67545a3cf2be7fbe0be0ca1a29d	k__Fungi	p__unidentified	c__unidentified	o__unidentified	f__unidentified	g__unidentified	s__unidentified	0	0	0	0	0	0	0	0	0	0	0	0	0	0	0	0	0	0	0	0	0	0	0	0	0	0	0	0	0	0	0	0	0	0	0	0	0	0	0	0	0	0
07b976cc655befe53a350ae5fb421aa7	k__Fungi	p__unidentified	c__unidentified	o__unidentified	f__unidentified	g__unidentified	s__unidentified	0	0	0	0	0	0	0	0	0	0	0	0	0	0	0	0	0	0	0	0	0	0	0	0	0	0	0	0	0	0	0	0	0	0	0	0	0	0	0	0	0	0
07be5a8a5f8bfb30df22deebe0d97c31	k__Fungi	p__unidentified	c__unidentified	o__unidentified	f__unidentified	g__unidentified	s__unidentified	0	0	0	0	0	0	0	0	0	0	0	0	0	0	0	0	0	0	0	0	0	0	0	0	0	0	0	0	0	0	0	0	0	0	0	0	0	0	0	0	0	0
07c5cfc5bcb543e5799ec0bb045ecbfc	k__Fungi	p__unidentified	c__unidentified	o__unidentified	f__unidentified	g__unidentified	s__unidentified	0	0	0	0	0	0	0	0	0	0	0	0	0	0	0	0	0	0	0	0	0	0	0	0	0	0	0	0	0	0	0	0	0	0	0	0	0	0	0	0	0	0
07c5dce91b1b49ed57882d5a5c47fb36	k__Fungi	p__unidentified	c__unidentified	o__unidentified	f__unidentified	g__unidentified	s__unidentified	0	0	0	0	0	0	0	0	0	0	0	0	0	0	0	0	0	0	0	0	0	0	0	0	0	0	0	0	0	0	0	0	0	0	0	0	0	0	0	0	0	0
07ca2ced04b90d4d6d746c834a5fe923	k__Fungi	p__unidentified	c__unidentified	o__unidentified	f__unidentified	g__unidentified	s__unidentified	0	0	0	0	0	0	0	0	0	0	0	0	0	0	0	0	0	0	0	0	0	0	0	0	0	0	0	0	0	0	0	0	0	0	0	0	0	0	0	0	0	0
07ca53e94d6169360d34f96ecbcc3ce2	k__Fungi	p__unidentified	c__unidentified	o__unidentified	f__unidentified	g__unidentified	s__unidentified	0	0	0	0	0	0	0	0	0	0	0	0	0	0	0	0	0	0	0	0	0	0	0	0	0	0	0	0	0	0	0	0	0	0	0	0	0	0	0	0	0	0
07cb10ac0196294031c07f8fda6c585f	k__Fungi	p__Monoblepharomycota	c__Monoblepharidomycetes	o__Monoblepharidales	f__unidentified	g__unidentified	s__unidentified	0	0	0	0	0	0	0	0	0	0	0	0	0	0	0	0	0	0	0	0	0	0	0	0	0	0	0	0	0	0	0	0	0	0	0	0	0	0	0	0	0	0
07cd4c683c7c7c9a8e194aebeb0a16b5	k__Fungi	p__unidentified	c__unidentified	o__unidentified	f__unidentified	g__unidentified	s__unidentified	1761	0	0	0	0	0	0	77	0	0	0	0	0	0	0	0	0	0	0	0	0	0	0	0	0	0	0	0	0	0	0	0	0	0	0	0	0	0	0	0	0	0
07d3da63e7e809f154235015906c1603	k__Fungi	p__unidentified	c__unidentified	o__unidentified	f__unidentified	g__unidentified	s__unidentified	0	0	0	0	0	0	0	0	0	0	0	0	0	0	0	0	0	4	0	0	0	0	0	0	0	0	0	0	0	0	0	0	0	0	0	0	0	0	0	0	0	0
07d829c055f51595270e0aeec53c7138	k__Fungi	p__unidentified	c__unidentified	o__unidentified	f__unidentified	g__unidentified	s__unidentified	0	0	0	0	0	0	0	0	0	0	0	0	0	0	0	0	0	0	0	0	0	0	0	0	0	0	0	0	0	0	0	0	0	0	0	0	0	0	0	0	0	0
07da3bcf45d69ed4e0f79ce993c3ecbf	k__Fungi	p__unidentified	c__unidentified	o__unidentified	f__unidentified	g__unidentified	s__unidentified	0	0	0	0	0	0	0	0	0	0	0	0	0	0	0	0	0	0	0	0	0	0	0	0	0	0	0	0	0	0	0	0	0	0	0	0	0	0	0	0	0	0
07da656d2d0e7940c50daa02aed37aab	k__Fungi	p__unidentified	c__unidentified	o__unidentified	f__unidentified	g__unidentified	s__unidentified	0	0	25	0	0	0	0	0	0	0	0	0	0	0	0	0	0	0	0	0	0	0	0	0	0	0	0	0	0	0	0	0	0	0	0	0	0	0	0	0	0	0
07e26111c7ba230d509aabc2d1428ec5	k__Fungi	p__unidentified	c__unidentified	o__unidentified	f__unidentified	g__unidentified	s__unidentified	0	0	0	0	0	0	0	0	0	0	0	0	0	0	0	0	0	0	0	0	7	0	0	0	0	0	0	0	0	0	0	0	0	0	0	0	0	0	0	0	0	0
07e7e0058f36c6f4294422607c8c69a7	k__Fungi	p__unidentified	c__unidentified	o__unidentified	f__unidentified	g__unidentified	s__unidentified	0	0	0	0	0	0	0	0	0	0	0	0	0	0	0	0	0	0	0	0	0	0	0	0	0	0	0	0	0	0	0	0	0	0	0	0	0	0	0	0	0	0
07eb9b4de7f8af8da215136428a4df9d	k__Fungi	p__Ascomycota	c__Leotiomycetes	o__Helotiales	f__Helotiales_fam_Incertae_sedis	g__Xenopolyscytalum	s__Xenopolyscytalum_pinea	0	0	0	0	0	0	0	0	0	0	0	0	0	0	0	0	0	0	0	0	0	0	0	0	0	0	0	0	0	0	0	0	0	0	0	0	0	0	0	0	0	0
07ef3db341fd1201209f76a04e1319ce	k__Fungi	p__unidentified	c__unidentified	o__unidentified	f__unidentified	g__unidentified	s__unidentified	0	0	0	0	0	0	0	0	0	0	0	0	0	0	0	0	0	0	0	0	0	0	0	0	0	0	0	0	0	0	0	0	0	0	0	0	0	0	0	0	0	0
07f2234718f96692cf39c2f76088774b	k__Fungi	p__unidentified	c__unidentified	o__unidentified	f__unidentified	g__unidentified	s__unidentified	0	0	0	0	0	0	0	0	0	0	0	0	0	0	0	0	0	0	0	0	0	0	0	0	0	0	0	0	0	0	0	0	0	0	0	0	0	0	0	0	0	0
07f3a26f5e7ba021cc048d913c68077e	k__Fungi	p__unidentified	c__unidentified	o__unidentified	f__unidentified	g__unidentified	s__unidentified	0	0	0	0	0	0	0	0	0	0	0	0	0	0	0	0	0	0	0	0	0	0	0	0	0	0	0	0	0	0	0	0	0	0	0	0	0	0	0	0	0	0
07f44a15be4ce91e66a522ea91939cad	k__Fungi	p__Ascomycota	c__Lecanoromycetes	o__Caliciales	f__Caliciaceae	g__Buellia	s__Buellia_russa	0	0	0	0	0	0	0	0	0	0	0	0	0	0	0	0	0	0	0	0	0	0	0	0	0	0	0	0	0	0	0	0	0	0	0	0	0	0	0	0	0	0
07fca70cb3313ff30ee6f2f2ea245504	k__Fungi	p__unidentified	c__unidentified	o__unidentified	f__unidentified	g__unidentified	s__unidentified	0	0	0	0	0	0	0	0	0	0	0	0	0	0	0	0	0	0	0	0	0	0	0	0	0	0	0	0	0	0	0	0	0	0	0	0	0	0	10	0	0	0
08010b1f8c47a72c4b23c439ad878daa	k__Fungi	p__unidentified	c__unidentified	o__unidentified	f__unidentified	g__unidentified	s__unidentified	0	0	0	0	0	0	0	0	0	0	0	0	0	0	0	0	0	0	0	0	0	0	0	0	0	0	0	0	0	0	0	0	0	0	0	0	0	0	0	0	0	0
0808202a67d77a52c4899346d3ab2f20	k__Fungi	p__Ascomycota	c__Sordariomycetes	o__Sordariales	f__Chaetomiaceae	g__Humicola	s__Humicola_nigrescens	0	0	0	0	0	0	0	0	0	0	0	0	0	0	0	0	0	0	0	0	0	0	0	0	0	0	0	0	0	0	0	0	0	0	0	0	0	0	0	0	0	0
080beeedb81cd9a08d04cc97ad428a65	k__Fungi	p__unidentified	c__unidentified	o__unidentified	f__unidentified	g__unidentified	s__unidentified	0	0	0	0	0	0	0	0	0	0	0	0	0	0	0	0	0	19	0	0	0	0	0	0	0	0	0	0	0	0	0	0	0	0	0	0	0	0	0	0	0	0
0812cb9f6c14f3c3be45ffaca19e5f10	k__Fungi	p__unidentified	c__unidentified	o__unidentified	f__unidentified	g__unidentified	s__unidentified	0	0	0	0	0	0	0	0	0	0	0	0	0	0	0	0	0	0	0	0	0	0	0	0	0	0	0	0	0	0	0	0	0	0	0	0	0	0	13	0	0	0
08216013e86d37b34ac0f4b317c8e0ea	k__Fungi	p__Chytridiomycota	c__unidentified	o__unidentified	f__unidentified	g__unidentified	s__unidentified	0	0	0	0	0	0	0	0	0	0	0	0	0	0	0	0	0	0	0	0	0	0	0	0	0	0	0	0	0	0	0	0	0	0	0	0	0	0	0	0	0	0
082725e4b9b699e76af0e6efa0bbd0ff	k__Fungi	p__unidentified	c__unidentified	o__unidentified	f__unidentified	g__unidentified	s__unidentified	0	0	0	0	0	0	0	0	0	0	0	0	0	0	0	0	0	0	0	0	0	0	0	0	0	0	0	0	0	0	0	0	0	0	0	0	0	0	0	0	0	0
082c06b6e9142261ffd57fd7c2729e18	k__Fungi	p__unidentified	c__unidentified	o__unidentified	f__unidentified	g__unidentified	s__unidentified	0	0	0	0	0	0	0	0	0	0	0	0	0	0	0	0	0	0	0	0	0	0	0	0	3	0	0	0	0	0	0	0	0	0	0	0	0	0	0	0	0	0
082c8ff29002b163f0183a26e4e37cef	k__Fungi	p__unidentified	c__unidentified	o__unidentified	f__unidentified	g__unidentified	s__unidentified	0	0	0	0	0	0	0	0	0	0	0	0	0	0	0	0	0	0	0	0	0	0	0	0	0	0	0	0	0	0	0	0	0	0	0	0	0	0	0	0	0	0
0832bf40df717433c76120aaa3c94475	k__Fungi	p__unidentified	c__unidentified	o__unidentified	f__unidentified	g__unidentified	s__unidentified	0	0	0	0	0	0	0	0	0	0	0	0	0	0	0	0	0	0	0	0	0	0	0	0	0	0	0	0	0	0	0	0	0	0	0	0	0	0	0	0	0	0
083ad6fdde28be856e233ea98c4f71a8	k__Fungi	p__unidentified	c__unidentified	o__unidentified	f__unidentified	g__unidentified	s__unidentified	0	0	0	0	0	0	0	0	0	0	0	0	0	0	0	0	0	0	0	0	0	0	0	0	0	0	0	0	0	0	0	0	0	0	0	0	0	0	0	0	0	0
083b503ef8694208f4b8161b20d9d7f5	k__Fungi	p__unidentified	c__unidentified	o__unidentified	f__unidentified	g__unidentified	s__unidentified	0	0	0	0	0	0	0	0	0	0	0	0	0	0	0	0	0	0	0	0	0	0	0	0	0	0	0	0	0	0	0	0	0	0	0	0	0	0	0	0	0	0
083e9a9fd207af4599ab794276d90135	k__Fungi	p__unidentified	c__unidentified	o__unidentified	f__unidentified	g__unidentified	s__unidentified	0	0	0	0	0	0	0	0	0	0	0	0	0	0	0	0	0	0	0	0	0	0	0	0	0	0	0	0	0	0	0	0	0	0	0	0	0	0	0	0	0	0
084003013c48cf9c9f52f333fab52e3b	k__Fungi	p__unidentified	c__unidentified	o__unidentified	f__unidentified	g__unidentified	s__unidentified	0	0	0	0	0	0	0	0	0	0	0	0	0	0	0	0	0	0	0	0	0	0	0	0	0	0	0	0	0	0	0	0	0	0	0	0	0	0	0	0	0	0
084b1b2b4c3e40dbdb6905dfd8c5c51a	k__Fungi	p__unidentified	c__unidentified	o__unidentified	f__unidentified	g__unidentified	s__unidentified	0	0	0	0	0	0	0	0	0	0	0	0	0	0	0	0	0	0	0	0	0	0	0	0	0	0	0	0	0	0	0	0	0	0	0	0	0	0	0	0	0	0
084daaca98948b955c04026704de1f3a	k__Fungi	p__unidentified	c__unidentified	o__unidentified	f__unidentified	g__unidentified	s__unidentified	0	0	0	0	0	0	0	0	0	0	0	0	0	0	0	0	0	0	0	0	0	0	0	0	0	0	0	0	0	0	0	0	0	0	0	0	0	0	0	0	0	0
084e2660fbbe8c41c856ec264fd1d36b	k__Fungi	p__unidentified	c__unidentified	o__unidentified	f__unidentified	g__unidentified	s__unidentified	0	0	0	0	0	0	0	0	0	0	0	0	0	0	0	0	0	0	0	0	0	0	0	0	0	0	0	0	0	0	0	0	0	0	0	0	0	0	0	0	0	0
084f91eaedd45c95445ecb8ca925162b	k__Fungi	p__unidentified	c__unidentified	o__unidentified	f__unidentified	g__unidentified	s__unidentified	0	0	0	0	0	0	0	0	0	0	0	0	0	0	0	0	0	0	0	0	0	0	0	0	0	0	0	0	0	0	0	0	0	0	0	0	0	0	0	0	0	0
08516fbdab875f0a45ae12e5818e9932	k__Fungi	p__Chytridiomycota	c__unidentified	o__unidentified	f__unidentified	g__unidentified	s__unidentified	0	0	0	0	0	0	0	0	0	0	0	0	0	0	0	0	0	0	0	0	0	0	0	0	0	0	0	0	0	0	0	0	0	0	0	0	0	0	0	0	0	0
0851a61085b649a331497a61842efb49	k__Fungi	p__unidentified	c__unidentified	o__unidentified	f__unidentified	g__unidentified	s__unidentified	0	0	0	0	0	0	0	0	0	0	0	0	0	0	0	0	0	0	0	0	0	0	0	0	0	0	0	0	0	0	0	0	0	0	0	0	0	0	0	0	0	0
085473a68a120de12382c166e41d906a	k__Fungi	p__unidentified	c__unidentified	o__unidentified	f__unidentified	g__unidentified	s__unidentified	0	0	6	0	0	0	0	0	0	0	0	0	0	0	0	0	0	0	0	0	0	0	0	0	0	0	0	0	0	0	0	0	0	0	0	0	0	0	0	0	0	0
085845a9667252943e1c9bd42cab6eb3	k__Fungi	p__Rozellomycota	c__unidentified	o__unidentified	f__unidentified	g__unidentified	s__unidentified	0	0	0	0	0	0	0	0	0	0	0	0	0	0	0	0	0	0	0	0	0	0	0	0	0	0	0	0	0	0	0	0	0	0	0	0	0	0	0	0	0	0
08593745741775878bdf994db9e0b7cc	k__Fungi	p__unidentified	c__unidentified	o__unidentified	f__unidentified	g__unidentified	s__unidentified	0	0	0	0	0	0	0	0	0	0	0	0	0	0	0	0	0	0	0	0	0	0	0	0	5	0	0	0	0	0	0	0	0	0	0	0	0	0	0	0	0	0
08611da8061a1e551ca573439a689759	k__Fungi	p__Chytridiomycota	c__unidentified	o__unidentified	f__unidentified	g__unidentified	s__unidentified	0	0	5	0	0	0	0	0	0	0	0	0	0	0	0	0	0	0	0	0	0	0	0	0	0	0	0	0	0	0	0	0	0	0	0	0	0	0	0	0	0	0
08634f98d984f710c8aab3037fecc2da	k__Fungi	p__unidentified	c__unidentified	o__unidentified	f__unidentified	g__unidentified	s__unidentified	0	0	0	0	0	0	0	0	0	0	0	0	0	0	0	0	0	0	0	0	0	0	0	0	0	0	0	0	0	0	0	0	0	0	0	0	0	0	0	0	0	0
0864434029a08ea0cb0f0f31cd131473	k__Fungi	p__unidentified	c__unidentified	o__unidentified	f__unidentified	g__unidentified	s__unidentified	0	0	0	0	0	0	0	0	0	0	0	0	0	0	0	0	0	0	0	0	0	0	0	0	0	0	0	0	0	0	0	0	0	0	0	0	0	0	0	0	0	0
08658418aa9d17a8994483df9ecc47ba	k__Fungi	p__unidentified	c__unidentified	o__unidentified	f__unidentified	g__unidentified	s__unidentified	0	0	0	0	0	0	0	0	0	0	0	0	0	0	0	0	0	0	0	0	0	0	0	0	0	0	0	0	0	0	0	0	0	0	0	0	0	0	0	0	0	0
086d6f3c7cc501eca504413b38096764	k__Fungi	p__unidentified	c__unidentified	o__unidentified	f__unidentified	g__unidentified	s__unidentified	0	0	0	0	0	0	0	0	0	0	0	0	0	0	0	0	0	0	0	0	0	0	0	0	0	0	0	0	0	0	0	8	0	0	0	0	0	0	0	0	0	0
08721f640979bce693a1d5223b4061ff	k__Fungi	p__Rozellomycota	c__unidentified	o__unidentified	f__unidentified	g__unidentified	s__unidentified	0	0	0	0	0	0	0	0	0	0	0	0	0	0	0	0	0	0	0	0	0	0	0	0	0	0	0	0	0	0	0	0	0	0	0	0	0	0	0	0	0	0
087a631100251e9c8ec5e9a88161677e	k__Fungi	p__unidentified	c__unidentified	o__unidentified	f__unidentified	g__unidentified	s__unidentified	0	0	0	0	0	0	0	0	0	0	0	0	0	0	0	0	0	0	0	0	0	0	0	0	0	0	0	0	0	0	0	0	0	0	0	0	0	0	0	0	0	0
0886495013f2012114b3cb9c527b36c3	k__Fungi	p__unidentified	c__unidentified	o__unidentified	f__unidentified	g__unidentified	s__unidentified	0	0	0	0	8	0	0	0	0	0	0	0	0	0	0	0	0	0	0	0	0	0	0	0	0	0	0	0	0	0	0	0	0	0	0	0	0	0	0	0	0	0
088b835ddc412e5318cc211c09f34f00	k__Fungi	p__unidentified	c__unidentified	o__unidentified	f__unidentified	g__unidentified	s__unidentified	0	0	0	0	0	0	0	0	0	0	0	0	0	0	0	0	0	0	0	0	0	0	0	0	0	0	0	0	0	0	0	0	0	0	0	0	0	0	0	0	0	0
0897f12ed3e8066b56174265714a3bea	k__Fungi	p__Chytridiomycota	c__unidentified	o__unidentified	f__unidentified	g__unidentified	s__unidentified	0	0	0	0	0	0	0	0	0	0	0	0	0	0	0	0	0	0	0	0	0	0	0	0	0	0	0	0	0	0	0	0	0	0	0	0	0	0	0	0	0	0
0898ef8e17f944fd2f77d3146bc97b6f	k__Fungi	p__Ascomycota	c__Leotiomycetes	o__Helotiales	f__Hyaloscyphaceae	g__Calycina	s__unidentified	0	0	0	0	0	0	0	0	0	0	0	0	0	0	0	0	0	0	0	0	0	0	0	0	0	0	0	0	0	0	0	0	0	0	0	0	0	0	0	0	0	0
089e19b5b3d248c776dc50d7ae3c87ac	k__Fungi	p__Ascomycota	c__Eurotiomycetes	o__Eurotiales	f__Aspergillaceae	g__Aspergillus	s__Aspergillus_heterocaryoticus	0	0	0	0	0	0	0	0	0	0	0	0	0	0	0	0	0	0	0	0	0	0	0	0	0	0	0	0	0	0	0	0	0	0	0	0	0	0	0	0	0	0
089e6282cef81f886005f9987e2ee427	k__Fungi	p__Ascomycota	c__Sordariomycetes	o__unidentified	f__unidentified	g__unidentified	s__unidentified	0	0	0	0	0	0	0	0	0	0	0	0	0	0	0	0	0	0	0	0	0	0	0	0	0	0	0	0	0	0	0	0	0	0	0	0	0	0	0	0	0	0
08a0f22304254684be13adb3eb72b759	k__Fungi	p__unidentified	c__unidentified	o__unidentified	f__unidentified	g__unidentified	s__unidentified	0	0	0	0	0	0	0	0	0	0	0	0	0	0	0	0	0	0	0	0	0	0	0	0	0	0	0	0	0	0	0	0	0	0	0	0	0	0	0	0	0	0
08a5828eb208632b543d57ac5eeca77a	k__Fungi	p__Ascomycota	c__Leotiomycetes	o__Helotiales	f__Helotiales_fam_Incertae_sedis	g__Volucrispora	s__Volucrispora_graminea	0	0	0	0	0	0	0	0	0	0	0	0	0	0	0	0	0	0	0	0	0	0	0	0	0	0	0	0	0	0	0	0	0	0	0	0	0	0	0	0	0	0
08a6790620ea1e0c078722ab4b007b26	k__Fungi	p__unidentified	c__unidentified	o__unidentified	f__unidentified	g__unidentified	s__unidentified	0	0	0	0	0	0	0	0	0	0	0	0	0	0	0	0	0	0	0	0	0	0	0	0	0	0	0	0	0	0	0	0	0	0	0	0	0	0	0	0	0	0
08b2bbf97c6c99b26b2624f8aaea3707	k__Fungi	p__Chytridiomycota	c__unidentified	o__unidentified	f__unidentified	g__unidentified	s__unidentified	0	0	0	0	0	0	0	0	0	0	0	0	0	0	0	0	0	0	0	0	0	0	0	0	0	0	0	0	0	0	0	0	0	0	0	0	0	0	0	0	0	0
08b4125318b66792cbfb221092323328	k__Fungi	p__unidentified	c__unidentified	o__unidentified	f__unidentified	g__unidentified	s__unidentified	0	0	0	0	0	0	0	0	0	0	0	0	0	0	0	0	0	0	0	0	0	0	0	0	0	0	0	0	0	0	0	0	0	0	0	0	0	0	0	0	0	0
08b67d946d55337f4c8a41df88e8280c	k__Fungi	p__Chytridiomycota	c__unidentified	o__unidentified	f__unidentified	g__unidentified	s__unidentified	0	0	0	0	0	0	0	0	0	0	0	0	0	0	0	0	0	0	0	0	0	0	0	0	0	0	0	0	0	0	0	0	0	0	0	0	0	0	0	0	0	0
08b74f673a6c9c36589d121c05897123	k__Fungi	p__unidentified	c__unidentified	o__unidentified	f__unidentified	g__unidentified	s__unidentified	0	0	0	0	0	0	0	0	0	0	0	0	0	0	0	0	0	0	0	0	0	0	0	0	0	0	0	0	0	0	0	0	0	0	0	0	0	0	0	0	0	0
08bcdc3ae56ed0131a8e866480f5ede7	k__Fungi	p__unidentified	c__unidentified	o__unidentified	f__unidentified	g__unidentified	s__unidentified	0	0	0	0	0	0	0	0	0	0	0	0	0	0	0	0	0	0	0	0	0	0	0	0	0	0	0	0	0	0	0	0	0	0	0	0	0	0	0	0	0	0
08bcf033fd4ff0a3b88f6a4fbbe3315d	k__Fungi	p__unidentified	c__unidentified	o__unidentified	f__unidentified	g__unidentified	s__unidentified	0	0	0	0	0	0	0	0	0	0	0	0	0	0	0	0	0	0	0	0	0	0	0	0	0	0	0	0	0	0	0	0	0	0	0	0	0	0	0	0	0	0
08c129be3f35d2bbd9ea4515bc82abf3	k__Fungi	p__unidentified	c__unidentified	o__unidentified	f__unidentified	g__unidentified	s__unidentified	0	13	0	0	0	0	0	0	0	0	0	0	0	0	0	0	0	0	0	0	0	0	0	0	0	0	0	0	0	0	0	0	0	0	0	0	0	0	0	0	0	0
08c3fef9c5d6d71c05965524217973ce	k__Fungi	p__unidentified	c__unidentified	o__unidentified	f__unidentified	g__unidentified	s__unidentified	0	0	0	0	0	0	0	0	0	0	0	0	0	0	0	0	0	0	0	0	0	0	0	0	0	0	0	0	0	0	0	0	0	0	0	0	0	0	0	0	0	0
08d3f75f9d093ccc71180cb39085f286	k__Fungi	p__unidentified	c__unidentified	o__unidentified	f__unidentified	g__unidentified	s__unidentified	0	0	0	3	0	0	0	0	0	0	1515	0	0	0	0	0	0	0	0	0	0	0	0	0	0	0	0	0	6365	2213	0	0	0	2115	0	0	0	0	0	0	0	70
08daf1f30fa08f3ef9032919e81c0721	k__Fungi	p__Ascomycota	c__Leotiomycetes	o__Helotiales	f__Helotiales_fam_Incertae_sedis	g__Mycoarthris	s__Mycoarthris_corallina	0	0	0	0	0	0	0	10	0	0	0	0	0	0	0	12	0	0	0	0	0	0	0	0	0	0	0	0	0	0	0	0	0	0	0	0	0	0	0	0	0	0
08ebbda0c47c94e52043e2b519339598	k__Fungi	p__Basidiomycota	c__Tremellomycetes	o__Filobasidiales	f__Piskurozymaceae	g__Piskurozyma	s__unidentified	0	0	0	0	0	0	0	0	0	0	0	0	0	0	0	0	0	0	0	0	0	0	0	0	0	0	0	0	0	0	0	0	0	0	0	0	0	0	0	0	0	0
08f0c69bbc342dee9be5d2d496ecf159	k__Fungi	p__unidentified	c__unidentified	o__unidentified	f__unidentified	g__unidentified	s__unidentified	0	0	0	0	0	0	0	0	0	0	0	0	0	0	0	0	0	0	0	0	0	0	0	0	0	0	0	0	0	0	0	0	0	0	0	0	0	0	0	0	0	0
08f3cf07f46979739f3c852d638e0215	k__Fungi	p__unidentified	c__unidentified	o__unidentified	f__unidentified	g__unidentified	s__unidentified	0	13	0	0	0	0	0	0	0	0	0	0	0	0	0	0	0	0	0	0	0	0	0	0	0	0	0	0	0	0	0	0	0	0	0	0	0	0	0	0	0	0
08feac196554548de06b4e58b8993d5c	k__Fungi	p__unidentified	c__unidentified	o__unidentified	f__unidentified	g__unidentified	s__unidentified	0	0	0	0	0	0	0	0	0	0	0	0	0	0	0	0	0	0	0	0	0	0	0	0	0	0	0	0	0	0	0	0	0	0	0	0	0	0	0	0	0	0
090adb9bda0689c1ed2a3883493e99ff	k__Fungi	p__unidentified	c__unidentified	o__unidentified	f__unidentified	g__unidentified	s__unidentified	0	0	0	204	0	0	0	0	0	0	24	0	0	0	0	0	0	0	0	0	0	0	0	0	0	0	0	0	21	16	0	0	0	29	0	0	0	0	0	0	0	0
091878eb77da9f24f22c906a6f3e4815	k__Fungi	p__Ascomycota	c__Eurotiomycetes	o__Chaetothyriales	f__Cyphellophoraceae	g__Cyphellophora	s__Cyphellophora_oxyspora	0	0	0	0	0	0	0	0	0	0	0	0	32	0	0	0	0	0	0	0	0	0	0	0	0	0	0	0	0	0	0	0	0	0	0	0	0	0	0	0	0	0
09260c45bb2f6c1bc301a4e30ce5e7f5	k__Fungi	p__Ascomycota	c__Sordariomycetes	o__Sordariales	f__Chaetomiaceae	g__unidentified	s__unidentified	0	0	0	0	0	0	0	0	0	0	0	0	0	0	0	0	0	0	0	0	0	0	0	0	0	0	0	0	0	0	0	0	0	0	0	0	0	0	0	0	0	0
0928b2018683861f6484b5194a824c40	k__Fungi	p__Basidiomycota	c__unidentified	o__unidentified	f__unidentified	g__unidentified	s__unidentified	0	0	0	0	0	0	0	0	0	0	0	0	0	0	0	0	0	5	0	0	0	0	0	0	0	0	0	0	0	0	0	0	0	0	0	0	0	0	0	0	0	0
0929c59b46e2bc97f90e0f5a7d919b5c	k__Fungi	p__unidentified	c__unidentified	o__unidentified	f__unidentified	g__unidentified	s__unidentified	0	0	0	0	0	0	0	0	0	0	0	0	0	0	0	0	0	0	0	0	0	0	0	0	0	0	0	0	0	0	0	0	0	0	0	0	0	0	0	0	0	0
093201c3ba218454635af1d8db638ae5	k__Fungi	p__unidentified	c__unidentified	o__unidentified	f__unidentified	g__unidentified	s__unidentified	0	0	0	0	0	0	0	0	0	0	0	0	0	0	0	0	0	0	0	0	0	0	0	0	0	0	0	0	0	0	0	0	0	0	0	0	0	4	0	0	0	0
09335fb98920ecb629340cfd2570149e	k__Fungi	p__unidentified	c__unidentified	o__unidentified	f__unidentified	g__unidentified	s__unidentified	0	0	0	0	0	0	0	0	0	0	0	0	0	0	0	0	0	0	0	0	0	0	0	0	0	0	0	0	0	0	0	0	0	0	0	0	0	0	0	0	0	0
093e258885d9dc017f83ec362ca8f05f	k__Fungi	p__unidentified	c__unidentified	o__unidentified	f__unidentified	g__unidentified	s__unidentified	0	0	0	0	0	0	0	0	0	0	0	0	0	0	0	0	0	0	0	0	0	0	0	0	0	0	0	0	0	0	0	276	0	0	126	72	0	0	146	0	0	0
09411f6d3c4e58456ff5a9b70c7c25de	k__Fungi	p__Chytridiomycota	c__unidentified	o__unidentified	f__unidentified	g__unidentified	s__unidentified	0	0	0	0	0	0	0	0	0	0	0	0	0	0	0	0	0	0	0	0	0	0	0	0	0	0	0	0	0	0	0	0	0	0	0	0	0	0	0	0	0	0
094185b55e6aebbad9e6da3823986635	k__Fungi	p__unidentified	c__unidentified	o__unidentified	f__unidentified	g__unidentified	s__unidentified	0	0	0	0	0	0	0	0	0	0	0	0	0	0	0	0	0	0	0	0	0	0	0	0	0	0	0	0	0	0	0	0	0	0	0	0	0	0	0	0	0	0
094c460db9680b6ffe88b9b19ca04f6d	k__Fungi	p__unidentified	c__unidentified	o__unidentified	f__unidentified	g__unidentified	s__unidentified	0	0	0	0	0	0	0	0	0	0	0	0	0	0	0	0	0	0	0	0	0	0	0	0	0	0	0	0	0	0	0	0	0	0	0	0	0	0	0	0	0	0
094ed6a2dd16fb80ed59e4a91f53072f	k__Fungi	p__unidentified	c__unidentified	o__unidentified	f__unidentified	g__unidentified	s__unidentified	0	0	0	0	0	0	0	0	0	0	0	0	0	0	0	0	0	0	0	0	0	0	0	0	0	0	0	0	0	0	0	0	0	0	0	0	0	0	0	0	0	0
09557c5cfc4b6a704f6e6efbff3ff9ae	k__Fungi	p__unidentified	c__unidentified	o__unidentified	f__unidentified	g__unidentified	s__unidentified	0	0	0	0	0	0	0	0	0	0	0	0	0	0	3	0	0	0	0	0	0	0	0	0	0	0	0	0	0	0	0	0	0	0	0	0	0	0	0	0	0	0
095aaea5d84626b7d49055d84349f1bb	k__Fungi	p__Rozellomycota	c__unidentified	o__unidentified	f__unidentified	g__unidentified	s__unidentified	0	0	0	0	0	0	0	0	0	0	0	0	0	0	0	0	0	0	0	0	0	0	0	0	0	0	0	0	0	0	0	0	0	0	0	0	0	0	0	0	0	0
095b411599d41a4581943dc1899d10f1	k__Fungi	p__unidentified	c__unidentified	o__unidentified	f__unidentified	g__unidentified	s__unidentified	0	0	0	0	0	0	0	0	0	0	0	0	0	0	0	0	0	0	0	0	0	0	0	0	0	0	0	0	0	0	0	0	0	0	0	0	0	0	0	0	0	0
095ee4cb99528bad47888e9be4c7da5a	k__Fungi	p__Ascomycota	c__Sordariomycetes	o__Hypocreales	f__Nectriaceae	g__Xenoacremonium	s__Xenoacremonium_falcatum	0	0	0	0	0	0	0	0	0	0	0	0	0	0	0	0	0	0	0	0	0	0	0	0	0	0	0	0	0	0	0	0	0	0	0	0	0	0	0	0	0	0
095f4ff5988d72b9acbae659d11ac1ab	k__Fungi	p__unidentified	c__unidentified	o__unidentified	f__unidentified	g__unidentified	s__unidentified	0	0	0	28	0	0	0	0	0	0	0	0	0	0	0	0	0	0	0	0	0	0	0	0	0	0	0	0	0	0	0	0	0	0	0	0	0	0	0	0	0	0
0963b9d1c582c0e53872e0d700ea9b7e	k__Fungi	p__unidentified	c__unidentified	o__unidentified	f__unidentified	g__unidentified	s__unidentified	0	0	0	0	0	0	0	0	0	0	0	0	0	0	0	0	0	0	0	0	0	0	0	0	0	0	0	0	0	0	0	0	0	0	0	0	0	0	0	0	0	0
0964a0dafa4b96f51df325ccd46d6798	k__Fungi	p__Ascomycota	c__Eurotiomycetes	o__Chaetothyriales	f__Herpotrichiellaceae	g__Cladophialophora	s__Cladophialophora_minutissima	0	0	0	0	0	0	0	0	0	0	0	0	0	0	0	0	0	0	0	0	0	0	0	0	0	0	0	0	0	0	0	0	0	0	0	0	0	0	0	0	0	0
096987356f973167d08cf60ccabd85a8	k__Fungi	p__unidentified	c__unidentified	o__unidentified	f__unidentified	g__unidentified	s__unidentified	0	0	0	0	0	0	0	0	0	0	0	0	0	0	0	0	0	0	0	0	0	0	0	0	0	0	0	0	0	0	0	0	0	0	0	0	0	0	0	0	0	0
097197c25df992123345bb2f2b925357	k__Fungi	p__unidentified	c__unidentified	o__unidentified	f__unidentified	g__unidentified	s__unidentified	0	0	0	0	0	0	0	0	0	0	0	0	0	0	0	0	0	0	0	0	0	0	0	0	0	0	0	0	0	0	0	0	0	0	0	0	0	0	0	0	0	0
098151f95b23ef607940bb393edaf1f7	k__Fungi	p__unidentified	c__unidentified	o__unidentified	f__unidentified	g__unidentified	s__unidentified	0	0	0	0	0	0	0	0	0	0	0	0	0	0	0	0	0	0	0	0	0	0	0	0	0	0	0	0	0	0	0	0	0	0	0	0	0	0	0	0	0	0
0989e5240687c2054d2cecf63fafdae4	k__Fungi	p__unidentified	c__unidentified	o__unidentified	f__unidentified	g__unidentified	s__unidentified	0	0	0	0	0	0	0	0	0	0	0	0	0	0	0	0	0	0	0	0	0	0	0	0	0	0	0	0	0	0	0	0	0	0	0	0	0	0	0	0	0	0
099010f50ebceb8ed5a9436337fb4821	k__Fungi	p__Basidiomycota	c__Microbotryomycetes	o__Sporidiobolales	f__Sporidiobolaceae	g__Rhodotorula	s__unidentified	0	0	0	0	0	0	0	0	0	0	0	0	0	0	0	0	0	0	0	0	0	0	0	0	0	0	0	0	0	0	0	0	0	0	0	0	0	0	0	0	0	0
0991f8e796bc9d5b7175cca424feece8	k__Fungi	p__unidentified	c__unidentified	o__unidentified	f__unidentified	g__unidentified	s__unidentified	0	0	0	0	0	0	0	0	0	0	0	0	0	0	0	0	0	0	0	0	0	0	0	0	0	0	0	0	0	0	5	0	0	0	0	0	0	0	0	0	0	0
099265b3f8394ab8b4d58f554a67cd62	k__Fungi	p__unidentified	c__unidentified	o__unidentified	f__unidentified	g__unidentified	s__unidentified	0	0	0	0	0	0	0	0	0	0	10	0	0	0	0	0	0	0	0	0	0	0	0	0	0	0	0	0	0	0	0	0	0	0	0	0	0	0	0	0	0	0
09977bfae9feb5d15daff04454629b96	k__Fungi	p__unidentified	c__unidentified	o__unidentified	f__unidentified	g__unidentified	s__unidentified	0	0	0	0	0	0	0	0	0	0	0	0	0	0	0	0	0	0	0	0	0	0	0	0	0	0	0	0	0	0	0	0	0	0	0	0	0	0	0	0	0	0
099f465fc7115ff06bdf6ca01fb19f0f	k__Fungi	p__unidentified	c__unidentified	o__unidentified	f__unidentified	g__unidentified	s__unidentified	0	0	0	0	0	0	0	0	0	0	0	0	0	0	0	0	0	0	0	0	0	0	0	0	0	0	0	0	0	0	0	0	0	0	0	0	0	0	0	0	0	0
09a1bc2f6caee5781ecb1c920fb786f1	k__Fungi	p__unidentified	c__unidentified	o__unidentified	f__unidentified	g__unidentified	s__unidentified	0	0	0	0	0	0	0	0	0	0	0	0	0	0	0	0	0	0	0	0	0	0	0	0	0	0	0	0	0	0	0	0	0	0	0	0	0	0	0	0	0	0
09a5e53e1d225897bb2db75fa0e7d276	k__Fungi	p__unidentified	c__unidentified	o__unidentified	f__unidentified	g__unidentified	s__unidentified	0	0	0	0	0	0	0	0	0	0	0	0	0	0	0	0	0	0	0	0	0	0	0	0	0	0	0	0	0	0	0	0	0	0	0	0	0	0	0	0	0	0
09a67d07c1fd7915f46cbb90fb8daf8c	k__Fungi	p__unidentified	c__unidentified	o__unidentified	f__unidentified	g__unidentified	s__unidentified	0	0	0	0	0	0	0	0	0	0	0	0	0	0	0	0	0	0	0	0	0	0	0	0	0	0	0	0	0	0	0	0	0	0	0	0	0	0	0	0	0	0
09a71b2484fa99add428207055d505d6	k__Fungi	p__Chytridiomycota	c__unidentified	o__unidentified	f__unidentified	g__unidentified	s__unidentified	0	0	0	0	0	0	0	0	0	0	0	0	0	0	0	0	0	0	0	0	11	0	0	0	0	0	0	0	0	0	0	0	0	0	0	0	0	0	0	0	0	0
09a9a8d2c087565f2b4b9d246151cca9	k__Fungi	p__unidentified	c__unidentified	o__unidentified	f__unidentified	g__unidentified	s__unidentified	0	0	0	0	0	0	0	0	0	0	0	0	0	0	0	0	0	0	0	0	0	0	0	0	0	0	0	0	0	0	0	0	0	0	0	0	0	0	0	0	0	0
09a9b48730461e22bd96fc0d945f4149	k__Fungi	p__Ascomycota	c__Leotiomycetes	o__Helotiales	f__Hyaloscyphaceae	g__Calycina	s__unidentified	0	0	0	0	0	0	0	0	0	0	0	0	0	0	0	0	0	0	0	0	0	0	0	0	0	0	0	0	0	0	0	0	0	0	0	0	0	0	0	0	0	0
09abf222cd93a0cd9c7a06d056ac180c	k__Fungi	p__unidentified	c__unidentified	o__unidentified	f__unidentified	g__unidentified	s__unidentified	0	0	0	0	0	0	0	0	0	0	0	0	0	0	0	0	0	0	0	0	0	0	0	0	0	0	0	0	0	0	0	0	0	0	0	0	0	0	0	0	0	0
09ac85648131414d40aeca77588c91d0	k__Fungi	p__unidentified	c__unidentified	o__unidentified	f__unidentified	g__unidentified	s__unidentified	0	0	0	0	0	0	0	0	0	0	0	0	0	0	0	0	0	0	0	0	0	0	0	0	0	0	0	0	0	0	0	0	0	0	0	0	0	0	0	0	0	0
09aeeb1248526debbd0092546d075a3a	k__Fungi	p__unidentified	c__unidentified	o__unidentified	f__unidentified	g__unidentified	s__unidentified	0	0	0	0	0	0	0	0	0	0	0	0	0	0	0	0	0	0	0	0	0	0	0	0	0	0	0	0	0	0	0	0	0	0	0	0	0	0	0	0	0	0
09bc4b070dd1eaa79d2a432b30fcca24	k__Fungi	p__unidentified	c__unidentified	o__unidentified	f__unidentified	g__unidentified	s__unidentified	0	0	0	0	0	0	0	0	0	0	0	0	0	0	0	0	0	0	0	0	0	0	0	0	0	0	0	0	0	0	0	0	0	0	0	0	0	0	0	0	0	0
09be8ff1bf8e124055c05e5c4b4314f4	k__Fungi	p__Rozellomycota	c__Rozellomycotina_cls_Incertae_sedis	o__GS05	f__unidentified	g__unidentified	s__unidentified	0	0	0	0	0	0	0	0	0	0	0	0	0	0	0	0	0	0	0	0	0	0	0	0	0	0	0	0	0	0	0	0	0	0	0	0	0	0	0	0	0	0
09cad6625b095026bce7660eb307366b	k__Fungi	p__Basidiomycota	c__Microbotryomycetes	o__Kriegeriales	f__Camptobasidiaceae	g__Glaciozyma	s__Glaciozyma_antarctica	0	0	0	0	0	0	0	0	0	0	0	0	0	0	0	0	31	0	0	0	0	0	0	0	0	0	0	0	0	0	0	0	0	0	0	0	0	0	0	0	0	0
09ccc583cfe868f3dd4f2a0910cf2655	k__Fungi	p__unidentified	c__unidentified	o__unidentified	f__unidentified	g__unidentified	s__unidentified	0	48	79	0	0	0	0	0	0	0	0	0	0	0	0	0	0	0	0	0	0	0	0	0	0	0	0	0	0	0	0	0	0	0	3	0	0	0	13	23	0	0
09cd21495d968e4e227d99d82cedc379	k__Fungi	p__Chytridiomycota	c__unidentified	o__unidentified	f__unidentified	g__unidentified	s__unidentified	0	0	0	0	0	0	0	0	0	0	0	0	0	0	0	0	0	0	0	0	0	0	0	0	0	0	0	0	0	0	0	0	0	0	0	0	0	0	0	0	0	0
09cd56fdde09c98d17d9c574386b6f63	k__Fungi	p__Ascomycota	c__Leotiomycetes	o__Helotiales	f__unidentified	g__unidentified	s__unidentified	0	0	0	0	0	0	0	0	0	0	0	0	0	0	0	0	0	0	0	0	0	0	0	0	0	0	0	0	0	0	0	0	0	0	0	0	0	0	0	0	0	0
09cecb47a02ebcf1a1707b32d54f4e31	k__Fungi	p__unidentified	c__unidentified	o__unidentified	f__unidentified	g__unidentified	s__unidentified	0	0	0	0	0	0	0	0	0	0	0	0	0	0	0	0	0	0	0	0	0	0	0	0	0	0	0	0	0	0	0	0	0	0	0	0	0	0	0	0	0	0
09d0b80c3edcbec5a02cf52ef33c913a	k__Fungi	p__unidentified	c__unidentified	o__unidentified	f__unidentified	g__unidentified	s__unidentified	0	0	9	0	0	0	0	0	0	0	0	0	0	0	0	0	0	0	0	0	0	0	0	0	0	0	0	0	0	0	0	0	0	0	0	0	0	0	0	0	0	0
09d25e0cb52e595fbfa724e8803f7563	k__Fungi	p__unidentified	c__unidentified	o__unidentified	f__unidentified	g__unidentified	s__unidentified	0	0	0	0	0	0	0	0	0	0	0	0	0	0	0	0	0	0	0	0	0	0	0	0	0	0	0	0	0	0	0	0	0	0	59	0	0	0	0	0	0	0
09df3adfaef0b57d9deeb125e4595f0a	k__Fungi	p__Ascomycota	c__Dothideomycetes	o__Pleosporales	f__Phaeosphaeriaceae	g__Phaeosphaeria	s__Phaeosphaeria_lycopodina	0	0	0	0	0	0	0	0	0	0	0	0	0	0	0	0	0	0	0	0	0	0	0	0	0	0	0	0	0	0	0	0	0	0	0	0	0	0	0	0	0	0
09e5bff93717687b63ce488bfb3b7191	k__Fungi	p__Ascomycota	c__Leotiomycetes	o__Helotiales	f__Hyaloscyphaceae	g__Gyoerffyella	s__unidentified	0	0	0	0	0	0	0	0	0	0	0	0	0	0	0	0	0	0	0	0	0	0	0	0	0	0	0	0	0	0	0	0	0	0	0	0	0	0	0	0	0	0
09e767e47cbdd3a4e4eaa970acb4eb73	k__Fungi	p__unidentified	c__unidentified	o__unidentified	f__unidentified	g__unidentified	s__unidentified	0	0	0	0	0	0	0	0	0	0	0	0	0	0	0	0	0	0	0	0	0	0	0	0	0	0	0	0	0	0	0	0	0	166	0	0	0	0	0	0	0	0
09e8679ce1bce7debdf1e4fc0e78577c	k__Fungi	p__unidentified	c__unidentified	o__unidentified	f__unidentified	g__unidentified	s__unidentified	0	0	0	0	0	0	0	0	0	0	0	0	0	0	0	0	0	0	0	0	0	0	0	0	0	0	0	0	0	0	0	0	0	0	0	0	0	0	0	0	0	0
09e979c2172b72bbe98d25c9603a88fb	k__Fungi	p__unidentified	c__unidentified	o__unidentified	f__unidentified	g__unidentified	s__unidentified	0	0	0	0	0	0	0	0	0	0	0	0	0	0	48	0	0	0	0	0	0	0	0	0	0	0	0	0	0	0	0	0	0	0	0	0	0	0	0	0	0	0
09ead6ad3196636d2d6129442ad61a6a	k__Fungi	p__Chytridiomycota	c__unidentified	o__unidentified	f__unidentified	g__unidentified	s__unidentified	0	0	0	0	0	0	0	0	0	0	0	0	0	0	0	0	0	0	0	0	0	0	0	0	0	0	0	0	0	0	0	0	0	0	0	0	0	0	0	0	0	0
09eb7ee4a74b71e009993fea767da16d	k__Fungi	p__Ascomycota	c__Lecanoromycetes	o__Caliciales	f__Caliciaceae	g__Buellia	s__Buellia_russa	0	0	0	0	0	0	0	0	0	0	0	0	0	0	0	0	0	0	0	0	0	0	0	0	0	0	0	0	0	0	0	0	0	0	0	0	0	0	0	0	0	0
09f6671d1bb78b856bc2daffec98916d	k__Fungi	p__unidentified	c__unidentified	o__unidentified	f__unidentified	g__unidentified	s__unidentified	0	0	0	0	0	0	0	0	0	0	0	0	0	0	0	0	0	0	0	0	0	0	0	0	0	0	0	0	0	0	0	0	0	0	0	0	0	0	0	0	0	0
09f77e7c0a541b6ca8f0f05f2208ec72	k__Fungi	p__Basidiomycota	c__Microbotryomycetes	o__unidentified	f__unidentified	g__unidentified	s__unidentified	0	0	0	0	0	0	0	0	0	0	0	0	0	0	0	0	0	0	0	0	0	0	0	0	0	0	0	0	0	0	0	0	0	0	0	0	0	0	0	0	0	0
09f7fd3d84e192964b07b0ef9448ccbc	k__Fungi	p__unidentified	c__unidentified	o__unidentified	f__unidentified	g__unidentified	s__unidentified	0	0	0	0	0	0	0	0	0	0	0	0	0	0	0	0	0	0	0	0	0	0	0	0	0	0	0	0	0	0	0	0	0	0	0	0	0	0	0	0	0	0
09fbdf2ab82b58b89f92cdd07df081af	k__Fungi	p__unidentified	c__unidentified	o__unidentified	f__unidentified	g__unidentified	s__unidentified	0	0	0	0	0	0	0	0	0	0	0	0	0	0	0	0	0	0	0	0	0	0	0	0	0	0	0	0	0	0	0	0	0	0	0	0	0	0	0	0	0	0
09fec0cbe746e8a232a349bd0687c3e3	k__Fungi	p__unidentified	c__unidentified	o__unidentified	f__unidentified	g__unidentified	s__unidentified	0	0	0	0	0	0	0	0	0	0	0	0	0	0	0	0	0	0	0	0	0	0	0	0	0	0	0	0	0	0	0	0	0	0	0	0	0	0	0	0	0	0
0a03577d6e8f5d36076a8d64d113519d	k__Fungi	p__Ascomycota	c__Sordariomycetes	o__Hypocreales	f__Nectriaceae	g__Xenoacremonium	s__Xenoacremonium_falcatum	0	0	0	0	0	0	0	0	0	0	0	0	0	0	0	0	0	0	0	0	0	0	0	0	0	0	0	0	0	0	0	0	0	0	0	0	0	0	0	0	0	0
0a04e089caebf7f535af2a0bc41ef434	k__Fungi	p__Ascomycota	c__unidentified	o__unidentified	f__unidentified	g__unidentified	s__unidentified	0	0	0	0	0	0	0	0	0	0	0	0	0	0	0	0	0	0	0	0	0	0	0	0	0	0	0	0	0	0	0	0	0	0	0	0	0	0	0	0	0	0
0a074c253d2c428e5abf8e5f1f948725	k__Fungi	p__unidentified	c__unidentified	o__unidentified	f__unidentified	g__unidentified	s__unidentified	0	0	0	0	0	0	0	0	0	0	0	0	0	0	0	0	0	0	0	0	0	0	0	0	0	0	0	0	0	0	0	0	0	0	0	0	0	0	0	0	0	0
0a0819404a48aef66213cb3f62219418	k__Fungi	p__unidentified	c__unidentified	o__unidentified	f__unidentified	g__unidentified	s__unidentified	0	0	0	0	0	0	0	0	0	0	0	0	0	0	0	0	0	0	0	0	0	0	0	0	0	0	0	0	0	0	0	0	0	0	0	0	0	0	0	0	0	0
0a0dbf31190fc2bcbf29cc3fb531c068	k__Fungi	p__unidentified	c__unidentified	o__unidentified	f__unidentified	g__unidentified	s__unidentified	0	0	0	0	0	0	0	0	0	0	0	0	0	0	0	0	0	0	0	0	0	0	0	0	0	0	0	0	0	0	0	0	0	0	0	0	0	0	0	0	0	0
0a0e94e659a8729d2bd8ddd58950f9c4	k__Fungi	p__unidentified	c__unidentified	o__unidentified	f__unidentified	g__unidentified	s__unidentified	0	0	0	0	0	0	0	0	0	0	0	0	0	0	0	0	0	0	0	0	0	0	0	0	0	0	0	0	0	0	0	27	0	0	0	0	0	0	0	3	0	0
0a15f24595d9ee229ad0d4e58020a14e	k__Fungi	p__unidentified	c__unidentified	o__unidentified	f__unidentified	g__unidentified	s__unidentified	0	0	0	0	0	0	0	0	0	0	0	0	0	0	0	0	0	0	0	0	0	0	0	0	0	0	0	0	0	0	0	0	0	0	0	0	0	0	0	0	0	0
0a18746e1575d82845955f431f841dd6	k__Fungi	p__unidentified	c__unidentified	o__unidentified	f__unidentified	g__unidentified	s__unidentified	0	0	0	0	0	0	0	0	0	0	0	0	0	0	0	0	0	0	0	0	0	0	0	0	0	0	0	0	0	0	0	0	0	0	0	0	0	0	0	0	0	0
0a19d5725c85c3cd56b0bf274de49581	k__Fungi	p__Chytridiomycota	c__unidentified	o__unidentified	f__unidentified	g__unidentified	s__unidentified	0	0	0	0	0	0	0	0	0	0	0	0	0	0	0	0	0	8	0	0	0	0	0	0	0	0	0	0	0	0	0	0	0	0	0	0	0	0	0	0	0	0
0a1a550dfd1df196b384c825299ad625	k__Fungi	p__unidentified	c__unidentified	o__unidentified	f__unidentified	g__unidentified	s__unidentified	0	0	0	0	0	0	0	0	0	0	0	0	0	0	0	0	0	0	0	0	0	0	0	0	0	0	0	0	0	0	0	0	0	0	0	0	0	0	0	0	0	0
0a266f09774b26b03d4764cb419827cd	k__Fungi	p__Ascomycota	c__Sordariomycetes	o__Hypocreales	f__Nectriaceae	g__Xenoacremonium	s__Xenoacremonium_falcatum	0	0	0	6	0	0	0	0	0	0	0	0	0	0	0	0	0	0	0	0	0	0	0	0	0	0	0	0	0	0	0	0	0	0	0	0	0	0	0	0	0	0
0a28e998e771214cdd4ccdab6565e267	k__Fungi	p__Ascomycota	c__Orbiliomycetes	o__Orbiliales	f__unidentified	g__unidentified	s__unidentified	0	0	0	0	0	0	0	0	0	0	0	0	0	0	0	0	0	0	0	0	0	0	0	0	0	0	0	0	0	0	0	0	0	0	0	0	0	0	0	0	0	0
0a2906e2b7c0f66f3fc081afb472bea2	k__Fungi	p__Ascomycota	c__Eurotiomycetes	o__Eurotiales	f__Aspergillaceae	g__Aspergillus	s__unidentified	0	98	0	0	0	5	0	0	0	0	0	0	0	23	0	0	0	0	0	0	0	0	0	0	0	0	0	0	0	0	0	23	0	0	51	0	0	0	0	62	0	0
0a2ebae0e573d0f11d43677263eba7d8	k__Fungi	p__unidentified	c__unidentified	o__unidentified	f__unidentified	g__unidentified	s__unidentified	0	0	0	0	0	0	0	0	0	0	0	0	0	0	0	0	0	0	0	0	0	0	0	0	0	0	0	0	0	0	0	0	0	0	0	0	0	0	0	0	0	0
0a38069f35f7fa1429887fb734b4e8d3	k__Fungi	p__Rozellomycota	c__unidentified	o__unidentified	f__unidentified	g__unidentified	s__unidentified	0	0	0	0	0	0	0	0	0	0	0	0	0	0	0	0	0	0	0	0	0	0	0	0	0	0	0	0	0	0	0	0	0	0	0	0	0	0	0	0	0	0
0a39d69a2ab70b870c164d3730e62169	k__Fungi	p__Ascomycota	c__Pezizomycetes	o__Pezizales	f__Pyronemataceae	g__Scutellinia	s__Scutellinia_torrentis	0	0	0	0	0	0	0	0	0	0	0	0	0	0	0	0	0	0	0	23	0	0	0	0	0	0	0	0	0	0	0	0	0	0	0	0	0	0	0	0	0	0
0a3b8188639334d31c462403c6602ccd	k__Fungi	p__unidentified	c__unidentified	o__unidentified	f__unidentified	g__unidentified	s__unidentified	0	0	0	0	0	0	0	0	0	0	0	0	0	0	0	0	0	0	0	0	0	0	0	0	0	0	0	0	0	0	0	0	0	0	0	0	0	0	0	0	0	0
0a3c8f89f7c129208212ef9c579e1e26	k__Fungi	p__unidentified	c__unidentified	o__unidentified	f__unidentified	g__unidentified	s__unidentified	0	0	0	0	0	0	0	0	0	0	0	0	0	0	0	0	0	0	0	0	0	0	0	0	0	0	0	0	0	0	0	0	0	0	0	0	0	0	0	0	0	0
0a3d124e1450933ef3e4464c92cf001a	k__Fungi	p__unidentified	c__unidentified	o__unidentified	f__unidentified	g__unidentified	s__unidentified	0	0	0	0	0	0	0	0	0	0	0	0	0	0	0	0	0	0	0	0	0	0	0	0	0	0	0	0	0	0	0	0	0	0	0	0	0	0	0	0	0	0
0a3f6023f27a67d9662f16fb9aad9156	k__Fungi	p__unidentified	c__unidentified	o__unidentified	f__unidentified	g__unidentified	s__unidentified	0	0	0	149	0	0	0	0	0	0	0	0	0	0	0	0	0	0	0	0	0	0	0	0	0	0	0	0	0	0	0	0	0	0	0	0	0	0	0	0	0	0
0a4ea590110a1ac9920c45ca3c8d456f	k__Fungi	p__Chytridiomycota	c__unidentified	o__unidentified	f__unidentified	g__unidentified	s__unidentified	0	0	0	0	0	0	0	0	0	0	0	0	0	0	0	0	0	0	0	0	0	0	0	0	0	0	135	0	0	0	0	0	0	0	0	0	0	0	0	0	0	0
0a4ec3cbb953e7ade8e991d86bc2ee51	k__Fungi	p__unidentified	c__unidentified	o__unidentified	f__unidentified	g__unidentified	s__unidentified	0	0	0	0	0	0	0	0	0	0	0	0	0	0	0	0	0	0	0	0	0	0	0	0	0	0	0	0	0	0	0	0	0	0	0	0	0	0	0	0	0	0
0a4fb922ab58a3545772c071e60a35ee	k__Fungi	p__unidentified	c__unidentified	o__unidentified	f__unidentified	g__unidentified	s__unidentified	0	0	0	0	0	0	0	0	0	0	0	0	0	0	0	0	0	0	0	0	0	0	0	0	0	0	0	0	0	0	0	0	0	0	0	0	0	0	0	0	0	0
0a513f215faad6559e296f46847efb21	k__Fungi	p__unidentified	c__unidentified	o__unidentified	f__unidentified	g__unidentified	s__unidentified	0	0	0	0	0	0	0	0	0	0	0	0	0	0	0	0	0	0	0	0	0	0	0	0	0	0	0	0	0	0	0	0	0	0	0	0	0	0	0	0	0	0
0a5b75b06348fed6a779aa1580381c87	k__Fungi	p__unidentified	c__unidentified	o__unidentified	f__unidentified	g__unidentified	s__unidentified	0	0	0	0	0	0	0	0	0	0	0	0	0	0	0	0	0	0	0	0	0	0	0	0	0	0	0	0	0	0	0	0	0	0	0	0	0	0	0	0	0	0
0a604e3bce57eb5c78a4745cd2bc9478	k__Fungi	p__Ascomycota	c__Dothideomycetes	o__Capnodiales	f__Cladosporiaceae	g__Cladosporium	s__unidentified	0	0	0	0	0	0	0	0	0	0	0	0	0	0	0	0	0	0	0	0	0	0	0	0	0	0	0	0	0	0	0	0	0	0	0	0	0	0	0	0	0	0
0a64ebef69b199be9527d2af6335f82e	k__Fungi	p__Ascomycota	c__Sordariomycetes	o__Hypocreales	f__Nectriaceae	g__Xenoacremonium	s__Xenoacremonium_falcatum	0	0	0	0	0	0	0	0	0	0	0	0	0	0	0	0	0	0	0	0	0	0	0	0	0	0	0	0	0	0	0	0	0	0	0	0	0	0	0	0	0	0
0a68b1a923a83cbb4fc9ed32181743e4	k__Fungi	p__unidentified	c__unidentified	o__unidentified	f__unidentified	g__unidentified	s__unidentified	0	0	0	0	0	0	0	0	0	0	0	0	0	0	0	0	0	0	0	0	0	0	0	0	0	0	0	0	0	0	0	0	0	0	0	0	0	0	0	0	0	0
0a72b8212b53c4d6d9f2ffada35fb219	k__Fungi	p__unidentified	c__unidentified	o__unidentified	f__unidentified	g__unidentified	s__unidentified	0	0	0	0	0	0	0	0	0	0	0	0	0	0	0	0	0	0	0	534	236	0	0	0	0	0	0	0	0	0	0	0	0	0	0	0	0	0	0	0	0	0
0a770b82d796da6aa44b2fabdfced1c7	k__Fungi	p__unidentified	c__unidentified	o__unidentified	f__unidentified	g__unidentified	s__unidentified	0	0	0	0	0	0	0	0	0	0	0	0	0	0	0	0	0	0	0	0	0	0	0	0	0	0	0	0	0	0	0	0	0	0	0	0	0	0	0	0	0	0
0a791bc89b6756faeb584ec19ef66fc6	k__Fungi	p__unidentified	c__unidentified	o__unidentified	f__unidentified	g__unidentified	s__unidentified	0	0	0	0	0	0	0	0	0	0	0	0	0	0	0	0	0	0	0	0	0	0	0	0	0	0	0	0	0	0	0	0	0	0	0	0	0	0	0	0	0	0
0a7978544921209bdc603de0fc4efa75	k__Fungi	p__unidentified	c__unidentified	o__unidentified	f__unidentified	g__unidentified	s__unidentified	0	0	0	0	0	0	0	0	0	0	0	0	0	0	0	0	0	0	0	0	0	0	0	0	0	0	0	0	0	0	0	0	0	0	0	0	0	0	0	0	0	0
0a7baba33e2ab793ac733f40c3174dc8	k__Fungi	p__unidentified	c__unidentified	o__unidentified	f__unidentified	g__unidentified	s__unidentified	0	0	0	0	0	0	0	0	0	0	0	0	0	0	0	0	0	0	0	0	0	0	0	0	0	0	0	0	0	0	0	0	0	0	0	0	0	0	0	0	0	0
0a820d8db50c34e2d13dcdf08c1c4f33	k__Fungi	p__Ascomycota	c__Lecanoromycetes	o__Peltigerales	f__Pannariaceae	g__Psoroma	s__Psoroma_fruticulosum	0	0	0	0	0	0	0	0	0	0	0	0	0	0	0	0	0	0	0	0	0	0	0	0	0	0	0	0	0	0	0	0	0	0	0	0	0	0	0	0	0	0
0a8bc040adcf745ae9f3e65413d8e2e3	k__Fungi	p__unidentified	c__unidentified	o__unidentified	f__unidentified	g__unidentified	s__unidentified	0	0	0	0	0	0	0	0	0	0	0	0	0	0	0	0	0	0	0	9	0	0	0	0	0	0	0	0	0	0	0	0	0	0	0	0	0	0	0	0	0	0
0a8bf9c733973700ad134b493a1e09c1	k__Fungi	p__unidentified	c__unidentified	o__unidentified	f__unidentified	g__unidentified	s__unidentified	0	0	0	0	0	0	0	0	0	0	0	0	0	0	0	0	0	0	0	0	0	0	0	0	0	0	0	0	0	0	0	0	0	0	0	0	0	0	0	0	0	0
0a912dc3871e60141a89c3b9be077990	k__Fungi	p__unidentified	c__unidentified	o__unidentified	f__unidentified	g__unidentified	s__unidentified	0	0	0	0	0	0	0	0	0	0	0	0	0	0	0	0	0	0	0	0	0	0	0	0	0	0	0	0	0	0	0	0	0	0	0	0	0	0	0	0	0	0
0a9cf3a57f915f344163ac6b3e8ab0d2	k__Fungi	p__unidentified	c__unidentified	o__unidentified	f__unidentified	g__unidentified	s__unidentified	0	0	0	0	0	0	0	0	0	0	0	0	0	0	0	0	0	0	0	0	0	0	0	0	0	0	0	94	0	0	0	0	0	0	0	0	0	0	0	0	0	0
0aa097d47a8bb2285862bd06e638a1de	k__Fungi	p__unidentified	c__unidentified	o__unidentified	f__unidentified	g__unidentified	s__unidentified	0	0	0	0	0	0	0	0	0	0	0	0	0	0	61	0	0	0	0	0	0	0	0	0	0	0	0	0	0	0	0	0	0	0	0	0	0	0	0	0	0	0
0aa179622b79c6535a11f7bac361f3e2	k__Fungi	p__unidentified	c__unidentified	o__unidentified	f__unidentified	g__unidentified	s__unidentified	0	0	0	0	0	0	0	0	0	0	0	0	0	0	0	0	0	0	0	0	0	0	0	0	0	0	0	0	0	0	0	0	0	0	0	0	0	0	0	0	0	0
0aa1ae9d434400279a8ec65b33079b55	k__Fungi	p__unidentified	c__unidentified	o__unidentified	f__unidentified	g__unidentified	s__unidentified	0	0	5	0	0	0	0	0	0	0	0	0	0	0	0	0	0	0	0	0	0	0	0	0	0	0	0	0	0	0	0	0	0	0	0	0	0	0	0	0	0	0
0aa3f68df3eb46c050ee2d01874a6e04	k__Fungi	p__Ascomycota	c__Sordariomycetes	o__Hypocreales	f__Nectriaceae	g__Xenoacremonium	s__Xenoacremonium_falcatum	0	0	0	0	0	0	0	0	0	0	0	0	0	0	0	0	0	0	0	0	0	0	0	0	0	0	0	0	0	0	0	0	0	0	0	0	0	0	0	0	0	0
0aa86c3c202006c2c49f64059730b846	k__Fungi	p__Chytridiomycota	c__unidentified	o__unidentified	f__unidentified	g__unidentified	s__unidentified	0	0	0	0	0	0	0	0	0	0	0	0	0	0	0	0	0	0	0	0	0	0	0	0	0	0	0	0	0	0	0	0	0	0	0	0	0	0	0	0	0	0
0aabcc4c2f2dea3f1f2c815e72d959ca	k__Fungi	p__unidentified	c__unidentified	o__unidentified	f__unidentified	g__unidentified	s__unidentified	0	0	0	0	0	0	0	0	0	0	0	0	0	0	0	0	0	0	0	0	0	0	0	0	0	0	0	0	0	0	0	0	0	0	0	0	0	0	0	0	0	0
0aac009fc5e8e1123fc6644a454cb70e	k__Fungi	p__unidentified	c__unidentified	o__unidentified	f__unidentified	g__unidentified	s__unidentified	0	0	0	0	0	0	0	0	0	0	0	0	0	0	0	0	0	0	0	0	0	0	0	0	0	0	0	0	0	0	0	0	0	0	0	0	0	0	0	0	0	0
0ab2fb9ec575d12265cd1a9c4836fd50	k__Fungi	p__Basidiomycota	c__unidentified	o__unidentified	f__unidentified	g__unidentified	s__unidentified	0	0	0	0	0	0	0	0	0	0	0	0	0	0	0	0	0	0	0	0	0	0	0	0	0	0	0	0	0	0	0	0	0	0	0	0	0	0	0	0	0	0
0ab784116f6d1953a6e3e7ec4197412f	k__Fungi	p__Chytridiomycota	c__unidentified	o__unidentified	f__unidentified	g__unidentified	s__unidentified	0	0	0	0	0	0	0	0	0	0	0	0	0	0	0	0	0	0	0	0	0	0	0	0	0	0	0	0	0	0	0	0	0	0	0	0	0	0	0	0	0	0
0ab87f2466669ff876fcff16a143174b	k__Fungi	p__unidentified	c__unidentified	o__unidentified	f__unidentified	g__unidentified	s__unidentified	0	0	0	0	0	0	0	0	0	0	0	0	0	0	0	0	0	0	0	0	0	0	0	0	0	0	0	0	0	0	0	0	0	0	0	0	0	0	0	0	0	0
0ab8b6cc83c4d82b84965ec553f25d32	k__Fungi	p__unidentified	c__unidentified	o__unidentified	f__unidentified	g__unidentified	s__unidentified	0	0	0	0	0	0	0	0	0	0	0	0	0	0	0	0	0	0	0	0	0	0	0	0	0	0	0	0	0	0	0	0	0	0	0	0	0	0	0	0	0	0
0ac5860b66cdaa53ea8cf6f97582f379	k__Fungi	p__Rozellomycota	c__unidentified	o__unidentified	f__unidentified	g__unidentified	s__unidentified	0	0	0	0	0	0	0	0	0	0	0	0	0	0	0	0	0	0	0	0	0	0	0	0	0	0	0	0	0	0	0	0	0	0	0	0	0	0	0	0	0	0
0ac60e38f61f4c5432fe01e71a995ba2	k__Fungi	p__Ascomycota	c__Leotiomycetes	o__Helotiales	f__Myxotrichaceae	g__Oidiodendron	s__unidentified	0	0	0	0	0	0	0	0	0	0	0	0	0	0	0	0	0	0	0	0	0	0	0	0	0	0	0	0	0	0	0	0	0	7	0	0	0	0	0	0	0	0
0ac7fdd8deecc24173ca554e5164ae56	k__Fungi	p__unidentified	c__unidentified	o__unidentified	f__unidentified	g__unidentified	s__unidentified	0	0	0	0	0	0	0	0	0	0	0	0	0	0	0	0	0	0	0	0	0	0	0	0	0	0	0	0	0	0	0	0	0	0	0	0	0	0	0	0	0	0
0acb4b29cb434ecdc1c8f2088155e34c	k__Fungi	p__unidentified	c__unidentified	o__unidentified	f__unidentified	g__unidentified	s__unidentified	0	0	0	0	0	0	0	0	0	0	0	0	0	0	0	0	0	0	0	0	0	0	0	0	0	0	0	0	0	0	0	0	0	0	0	0	0	0	0	0	0	0
0acf5e4aedf412293e46c21fc3aabba9	k__Fungi	p__unidentified	c__unidentified	o__unidentified	f__unidentified	g__unidentified	s__unidentified	0	0	0	0	0	0	0	0	0	0	0	0	0	0	0	0	0	0	0	0	0	0	0	0	0	0	0	0	0	0	0	0	0	0	0	0	0	0	0	0	0	0
0ad3b08a12a8b43bc1c7b145c92ef366	k__Fungi	p__unidentified	c__unidentified	o__unidentified	f__unidentified	g__unidentified	s__unidentified	0	0	0	0	0	0	0	0	0	0	0	0	0	0	0	0	0	0	0	0	0	0	0	0	0	0	0	0	0	0	0	0	0	0	0	0	0	0	0	0	0	0
0ad928b8c7e8b21f272527e2745c8063	k__Fungi	p__Chytridiomycota	c__unidentified	o__unidentified	f__unidentified	g__unidentified	s__unidentified	0	0	0	0	0	0	0	0	0	0	0	0	0	0	0	0	0	0	0	0	0	0	0	0	0	0	0	0	0	0	0	0	0	0	0	0	0	0	0	0	0	0
0ada50fe6fa6c781d49f0678d9181449	k__Fungi	p__unidentified	c__unidentified	o__unidentified	f__unidentified	g__unidentified	s__unidentified	0	0	8	0	0	0	0	0	0	0	0	0	0	0	0	0	0	0	0	0	0	0	0	0	0	0	0	0	0	0	0	0	0	0	0	0	0	0	0	0	0	0
0ada95c395ba5f80eb5fc7cf7eceb7a6	k__Fungi	p__unidentified	c__unidentified	o__unidentified	f__unidentified	g__unidentified	s__unidentified	0	0	0	0	0	0	0	0	0	0	0	0	0	0	0	0	0	0	0	0	0	0	0	0	0	0	0	0	0	0	0	0	0	0	0	0	0	0	0	0	0	0
0addd7ae75ffeab77fb499f75eadf558	k__Fungi	p__unidentified	c__unidentified	o__unidentified	f__unidentified	g__unidentified	s__unidentified	0	0	0	0	0	0	0	0	0	0	0	0	0	0	0	0	0	0	0	0	0	0	0	0	0	0	0	0	0	0	0	0	0	0	0	0	0	0	0	0	0	0
0ae1279a272def87cf60bf5490f62e12	k__Fungi	p__Ascomycota	c__Leotiomycetes	o__Helotiales	f__Helotiales_fam_Incertae_sedis	g__Cadophora	s__Cadophora_gregata	0	0	0	0	0	0	0	0	0	0	0	0	0	0	0	0	0	0	0	0	0	0	0	0	0	0	0	0	0	0	0	0	0	0	0	0	0	0	0	0	0	0
0ae5494e82a8d2b2c0a6e76932137853	k__Fungi	p__unidentified	c__unidentified	o__unidentified	f__unidentified	g__unidentified	s__unidentified	0	0	0	0	0	0	0	0	0	0	0	0	0	0	0	0	0	0	0	0	0	0	0	0	0	0	0	0	0	0	0	0	0	0	0	0	0	0	0	0	0	0
0ae9fb4fecacb6c9e8eacdb308d3f724	k__Fungi	p__Ascomycota	c__Sordariomycetes	o__Glomerellales	f__Plectosphaerellaceae	g__Plectosphaerella	s__Plectosphaerella_cucumerina	0	0	0	0	0	0	0	0	0	0	0	0	0	0	0	0	0	0	0	0	0	0	0	0	0	0	0	0	0	0	5	0	0	0	0	0	0	8	0	0	0	0
0ae9fcdcebc7dcf7da539b1b766fe280	k__Fungi	p__Ascomycota	c__Sordariomycetes	o__Hypocreales	f__Nectriaceae	g__Xenoacremonium	s__Xenoacremonium_falcatum	0	0	0	0	0	0	0	0	0	0	0	0	0	0	0	0	0	0	0	0	0	0	0	0	0	0	0	0	0	0	0	0	0	0	0	0	0	0	0	0	0	0
0aea69f492c7c84d89cea3b83a1a1a19	k__Fungi	p__Chytridiomycota	c__unidentified	o__unidentified	f__unidentified	g__unidentified	s__unidentified	0	0	0	0	0	0	0	0	0	0	0	0	0	0	0	0	0	0	0	0	0	0	0	0	0	0	0	0	0	0	0	0	0	0	0	0	0	0	0	0	0	0
0aea793d15abdd3467dcde111ff58fca	k__Fungi	p__unidentified	c__unidentified	o__unidentified	f__unidentified	g__unidentified	s__unidentified	0	0	0	0	0	0	0	0	25	0	0	0	0	0	0	0	0	0	0	0	0	0	0	0	0	0	0	0	0	0	0	0	0	0	0	0	0	0	0	0	0	0
0aec3b72f86198c91a013539e132e3b1	k__Fungi	p__Ascomycota	c__Sordariomycetes	o__Hypocreales	f__Nectriaceae	g__Xenoacremonium	s__Xenoacremonium_falcatum	0	0	0	0	0	0	0	0	0	0	0	0	0	0	0	0	0	0	0	0	0	0	0	0	0	0	0	0	0	0	0	0	0	0	0	0	0	0	0	0	0	0
0aef42ba05bd96fbac98e6ff7871ea3b	k__Fungi	p__unidentified	c__unidentified	o__unidentified	f__unidentified	g__unidentified	s__unidentified	0	12	0	0	0	0	0	0	0	0	0	0	0	0	0	0	0	0	0	0	0	0	0	0	0	0	0	0	0	0	0	0	0	0	0	0	0	0	0	0	0	0
0af5c673bb9fd571da9a5f57d62080e5	k__Fungi	p__Ascomycota	c__unidentified	o__unidentified	f__unidentified	g__unidentified	s__unidentified	0	0	0	0	0	0	0	0	0	0	0	0	0	0	0	0	0	0	0	0	0	0	0	0	0	0	0	0	0	0	0	0	0	0	0	0	0	0	0	0	0	0
0af5ded162faa28cfef3d5b4815a74ba	k__Fungi	p__Ascomycota	c__Sordariomycetes	o__Hypocreales	f__Bionectriaceae	g__unidentified	s__unidentified	0	0	0	0	0	0	0	0	0	0	0	0	0	0	0	0	0	0	0	0	0	0	0	0	0	0	0	0	0	0	0	0	0	0	0	0	0	0	0	0	0	0
0af7eea9e5bdfba13941a4dea49d1dac	k__Fungi	p__Rozellomycota	c__unidentified	o__unidentified	f__unidentified	g__unidentified	s__unidentified	0	0	0	0	0	0	0	0	0	0	0	0	0	0	0	0	0	0	0	0	0	0	0	0	0	0	0	0	0	0	0	0	0	0	0	0	0	0	0	0	0	0
0af84c369413a656ad2d145b74b3f9db	k__Fungi	p__unidentified	c__unidentified	o__unidentified	f__unidentified	g__unidentified	s__unidentified	0	0	0	0	0	0	0	0	0	0	0	0	0	0	0	0	0	0	0	0	0	0	0	0	0	0	0	0	0	0	0	0	0	0	0	0	0	0	0	0	0	0
0afa77fc9efc6b1c315fbb5f590066b8	k__Fungi	p__unidentified	c__unidentified	o__unidentified	f__unidentified	g__unidentified	s__unidentified	0	0	0	0	0	0	0	0	0	0	0	0	0	0	0	0	0	0	0	0	0	0	0	0	0	0	0	0	0	0	0	0	0	0	0	0	0	0	0	0	0	0
0afb4d286cc7f316fe551ada9a11b539	k__Fungi	p__unidentified	c__unidentified	o__unidentified	f__unidentified	g__unidentified	s__unidentified	0	0	0	0	0	0	0	0	0	0	0	0	0	0	0	0	0	0	0	0	0	0	0	0	0	0	0	0	0	0	0	0	0	0	0	0	0	0	0	0	0	0
0afef755f0aa80c8623bb3e5521b98e4	k__Fungi	p__unidentified	c__unidentified	o__unidentified	f__unidentified	g__unidentified	s__unidentified	0	0	0	0	0	0	0	0	0	0	0	0	0	0	0	0	0	0	0	0	0	0	0	0	0	0	0	0	0	0	0	0	0	0	0	0	0	0	0	0	0	0
0b015454917adfe3ed3a9d593a739431	k__Fungi	p__Ascomycota	c__Sordariomycetes	o__Hypocreales	f__Nectriaceae	g__Fusicolla	s__Fusicolla_aquaeductuum	0	0	0	25	0	0	0	0	0	0	0	0	0	0	0	0	0	0	0	0	0	0	0	0	0	0	0	0	0	0	0	0	0	0	0	0	0	0	0	0	0	0
0b0672c75618a25207a918cb6e4897cc	k__Fungi	p__unidentified	c__unidentified	o__unidentified	f__unidentified	g__unidentified	s__unidentified	0	0	0	0	0	0	0	0	0	0	0	0	0	0	0	0	0	0	0	0	0	0	0	0	0	0	0	0	0	0	0	0	0	0	0	0	0	0	0	0	0	0
0b08d9628bd7b210046623382e2fc765	k__Fungi	p__unidentified	c__unidentified	o__unidentified	f__unidentified	g__unidentified	s__unidentified	0	0	0	0	0	0	0	0	0	0	25	0	0	0	0	0	0	0	0	0	0	0	0	0	0	0	0	0	0	4	0	0	0	0	0	0	0	0	0	0	0	0
0b0a0a0d2121c50fde16331b04c08c0a	k__Fungi	p__unidentified	c__unidentified	o__unidentified	f__unidentified	g__unidentified	s__unidentified	0	0	0	6	0	0	0	0	0	0	0	0	0	0	0	0	0	0	0	0	0	0	0	0	0	0	0	0	0	0	0	0	0	0	0	0	0	0	0	0	0	0
0b0ec56a239d7c7389ce53abd06ed7ac	k__Fungi	p__unidentified	c__unidentified	o__unidentified	f__unidentified	g__unidentified	s__unidentified	0	0	0	0	0	0	0	0	7	0	0	0	0	0	0	0	0	0	0	0	0	0	0	0	0	0	0	0	0	0	0	0	0	0	0	0	0	0	0	0	0	0
0b0f2fc6635e36ba2c61588f278fe028	k__Fungi	p__unidentified	c__unidentified	o__unidentified	f__unidentified	g__unidentified	s__unidentified	0	0	0	0	0	0	0	0	0	0	0	0	0	0	0	0	0	0	0	0	0	0	0	0	0	0	0	0	0	0	0	0	0	0	0	0	0	0	0	0	0	0
0b0fb950b89a7775133aae1d9f31b70a	k__Fungi	p__unidentified	c__unidentified	o__unidentified	f__unidentified	g__unidentified	s__unidentified	0	0	0	0	0	0	0	0	0	0	0	0	0	0	0	0	0	0	0	0	0	0	0	0	0	0	0	0	0	0	0	0	0	0	0	0	0	0	0	0	0	0
0b11fc8894f8424f42e7908fb275c149	k__Fungi	p__unidentified	c__unidentified	o__unidentified	f__unidentified	g__unidentified	s__unidentified	0	0	0	0	0	0	0	0	0	0	0	0	0	23	0	0	0	0	0	0	0	0	0	0	0	0	0	0	0	0	0	0	0	0	0	0	0	0	0	0	0	0
0b17dde5325f21c98fc1b60d059d5a48	k__Fungi	p__unidentified	c__unidentified	o__unidentified	f__unidentified	g__unidentified	s__unidentified	0	0	0	172	0	0	0	0	0	0	0	0	0	0	0	0	0	0	0	0	0	0	0	0	0	0	0	0	0	29	0	0	0	0	0	0	0	0	0	0	0	0
0b1c8758e1736b31cc9c954a6d4b12ff	k__Fungi	p__unidentified	c__unidentified	o__unidentified	f__unidentified	g__unidentified	s__unidentified	0	0	0	0	0	0	0	0	0	0	0	0	0	0	0	0	0	0	0	0	0	0	0	0	0	0	0	0	0	0	0	0	0	0	0	0	0	0	0	0	0	0
0b1d3a36372a3ab7a66b611778db943c	k__Fungi	p__unidentified	c__unidentified	o__unidentified	f__unidentified	g__unidentified	s__unidentified	0	0	0	0	0	0	0	0	0	0	0	0	0	0	0	0	0	0	0	0	0	0	0	0	0	0	0	0	0	0	0	0	0	0	0	0	0	0	0	0	0	0
0b1df723f73ceea24d7a7cf18d30a553	k__Fungi	p__unidentified	c__unidentified	o__unidentified	f__unidentified	g__unidentified	s__unidentified	0	0	0	0	0	0	0	0	23	0	0	121	0	0	0	0	0	0	0	0	0	0	0	0	0	0	0	0	0	0	0	0	0	0	0	0	0	0	0	0	0	0
0b252b34d9c0ccb9f880cd1b45729a30	k__Fungi	p__unidentified	c__unidentified	o__unidentified	f__unidentified	g__unidentified	s__unidentified	0	0	0	0	0	0	0	0	0	0	0	0	0	0	0	0	0	0	0	0	0	0	0	0	0	0	0	0	0	0	0	0	0	0	0	0	0	0	0	0	0	0
0b2721ced46d78c82d834832cf2f27d0	k__Fungi	p__unidentified	c__unidentified	o__unidentified	f__unidentified	g__unidentified	s__unidentified	0	0	0	0	0	0	0	0	0	0	0	0	0	0	0	0	0	0	0	0	0	0	0	0	0	0	0	0	0	0	0	0	0	0	0	0	0	0	0	0	0	0
0b285562bfa745ae540e2c2e1c738d3e	k__Fungi	p__unidentified	c__unidentified	o__unidentified	f__unidentified	g__unidentified	s__unidentified	0	0	0	0	0	0	0	0	0	0	0	0	0	0	0	0	0	0	0	0	0	25	0	0	0	0	0	0	0	0	0	0	0	0	0	0	0	0	0	0	0	0
0b311ad909898656c09d897cdf6a1eb8	k__Fungi	p__Basidiomycota	c__unidentified	o__unidentified	f__unidentified	g__unidentified	s__unidentified	0	0	0	0	0	0	0	0	0	0	0	0	0	0	0	0	0	0	0	0	0	0	0	0	0	0	0	0	0	0	0	0	0	0	0	0	0	0	0	0	0	0
0b340a6dd272ee4c9ccfaa19ac300613	k__Fungi	p__unidentified	c__unidentified	o__unidentified	f__unidentified	g__unidentified	s__unidentified	0	0	0	0	0	0	0	0	0	0	0	0	0	0	0	0	0	0	0	0	0	0	0	0	0	0	0	0	0	0	0	0	0	0	0	0	0	0	0	0	0	0
0b3b1583da7499353581a7dac20e5d8e	k__Fungi	p__Ascomycota	c__unidentified	o__unidentified	f__unidentified	g__unidentified	s__unidentified	0	0	0	0	0	4211	0	0	0	0	0	0	0	70	0	0	0	0	0	0	0	0	0	0	0	0	0	0	0	0	0	0	0	0	5	0	0	0	0	0	0	0
0b3be1befc5a9da46978a84e69f8131f	k__Fungi	p__Chytridiomycota	c__unidentified	o__unidentified	f__unidentified	g__unidentified	s__unidentified	0	0	0	0	0	0	0	0	0	0	0	0	0	0	0	0	0	0	0	0	0	0	0	0	0	0	0	0	0	0	0	0	0	0	0	0	0	0	0	0	0	0
0b3db6830a4523dc1436d8f359bbcb5e	k__Fungi	p__Chytridiomycota	c__unidentified	o__unidentified	f__unidentified	g__unidentified	s__unidentified	0	0	0	0	0	0	0	0	0	0	0	0	0	0	0	0	0	0	0	0	0	0	0	0	0	0	0	0	0	0	0	0	0	0	0	0	0	0	0	0	0	0
0b3fde65c6defe1b943e942c177683f4	k__Fungi	p__Rozellomycota	c__unidentified	o__unidentified	f__unidentified	g__unidentified	s__unidentified	0	0	0	0	0	0	0	0	0	0	0	0	0	0	0	0	0	0	0	0	0	0	0	0	0	0	0	0	0	0	0	0	0	0	0	0	0	0	0	0	0	0
0b45d143cae0b98398be3e4598dbd6f9	k__Fungi	p__unidentified	c__unidentified	o__unidentified	f__unidentified	g__unidentified	s__unidentified	0	0	23	0	0	0	0	0	0	0	0	0	0	0	0	0	0	0	0	0	0	0	0	0	0	0	0	0	0	0	0	0	0	0	0	0	0	0	0	0	0	0
0b4a69a58ce3d79469213e58fe33773a	k__Fungi	p__unidentified	c__unidentified	o__unidentified	f__unidentified	g__unidentified	s__unidentified	0	0	0	0	0	0	0	0	0	0	0	0	0	0	0	0	0	0	0	0	0	0	0	0	0	0	0	0	0	0	0	0	0	0	0	0	0	0	0	0	0	0
0b57d1bac0c1d9608d98294fbfb863b1	k__Fungi	p__unidentified	c__unidentified	o__unidentified	f__unidentified	g__unidentified	s__unidentified	0	0	0	0	0	0	0	0	0	0	0	0	0	0	0	0	0	0	0	0	0	0	0	0	0	0	0	0	0	0	0	0	0	129	0	0	0	0	0	0	0	0
0b58b7a4aa8b1c811bf5990e67524464	k__Fungi	p__Ascomycota	c__Leotiomycetes	o__Helotiales	f__Dermateaceae	g__Oculimacula	s__Oculimacula_yallundae	0	0	0	0	0	0	0	0	0	0	0	0	0	0	0	0	0	0	0	0	0	0	0	0	0	0	0	0	0	0	0	0	0	0	0	0	0	0	0	0	0	0
0b5f064ad897fc86472f48bb6102d2c6	k__Fungi	p__unidentified	c__unidentified	o__unidentified	f__unidentified	g__unidentified	s__unidentified	0	0	0	0	0	0	0	0	0	0	0	0	0	0	0	0	0	0	0	0	0	0	0	0	0	0	0	0	0	0	0	0	0	0	0	0	0	0	0	0	0	0
0b62ddecaf3b0677e1d15bc96771a817	k__Fungi	p__unidentified	c__unidentified	o__unidentified	f__unidentified	g__unidentified	s__unidentified	0	0	0	0	0	0	0	0	0	0	0	0	0	0	0	0	0	0	0	0	0	0	0	0	0	0	0	0	0	0	0	0	0	0	0	0	0	0	0	0	0	0
0b67e75b67c70958941d57958faabb22	k__Fungi	p__unidentified	c__unidentified	o__unidentified	f__unidentified	g__unidentified	s__unidentified	0	11	0	0	0	0	0	0	0	0	0	0	0	0	0	0	0	0	0	0	0	0	0	0	0	0	0	0	0	0	0	0	0	0	0	0	0	0	0	0	0	0
0b6b0ce20008facf0cb369dfae109c76	k__Fungi	p__unidentified	c__unidentified	o__unidentified	f__unidentified	g__unidentified	s__unidentified	0	0	0	0	0	0	0	0	0	0	0	0	0	0	0	0	0	0	0	0	0	0	0	0	0	0	0	0	0	0	0	0	0	0	0	0	0	0	0	0	0	0
0b6d567d2c814a404fb41d5dc1c50957	k__Fungi	p__Rozellomycota	c__Rozellomycotina_cls_Incertae_sedis	o__Branch03	f__unidentified	g__unidentified	s__unidentified	0	0	0	0	0	0	0	0	0	0	0	0	0	0	0	0	0	0	0	0	0	0	0	0	0	0	0	0	0	0	0	0	0	0	0	0	0	0	0	0	0	0
0b6f92d68a95e1f6873f098b8c7ba17f	k__Fungi	p__unidentified	c__unidentified	o__unidentified	f__unidentified	g__unidentified	s__unidentified	0	0	0	0	0	0	0	0	0	0	0	0	0	0	0	0	0	0	0	0	0	0	0	0	0	0	0	0	0	0	0	0	0	0	0	0	0	0	0	0	0	0
0b70becf9d93852bd66132a10139de08	k__Fungi	p__unidentified	c__unidentified	o__unidentified	f__unidentified	g__unidentified	s__unidentified	0	0	0	0	0	0	0	0	0	0	0	0	0	0	0	0	0	0	0	0	0	0	0	0	0	0	0	0	0	0	0	0	0	0	0	0	0	0	0	0	0	0
0b715cad59bf9892593f38ff1cba69a4	k__Fungi	p__unidentified	c__unidentified	o__unidentified	f__unidentified	g__unidentified	s__unidentified	0	0	0	0	0	0	0	0	0	0	0	0	0	0	0	0	0	0	0	3	0	0	0	0	0	0	0	0	0	0	0	0	0	0	0	0	0	0	0	0	0	0
0b72e3682fa724844ee2695e68f60c00	k__Fungi	p__unidentified	c__unidentified	o__unidentified	f__unidentified	g__unidentified	s__unidentified	0	0	0	0	0	0	0	0	0	0	0	0	0	0	0	0	0	0	0	0	0	0	0	0	0	0	0	0	0	0	0	0	0	0	0	0	0	0	0	0	0	0
0b7518d1c2eb7b3e659d4ee2f4b05dae	k__Fungi	p__unidentified	c__unidentified	o__unidentified	f__unidentified	g__unidentified	s__unidentified	0	0	0	179	0	0	0	0	0	0	0	0	0	0	0	0	0	0	0	0	0	0	0	0	0	0	0	0	0	74	0	0	0	0	0	0	0	0	0	0	0	0
0b76629a640e15e47af9afff37d90c10	k__Fungi	p__Chytridiomycota	c__unidentified	o__unidentified	f__unidentified	g__unidentified	s__unidentified	0	0	0	0	0	0	0	0	0	0	0	0	0	0	0	0	0	0	0	0	0	0	0	0	0	0	0	0	0	0	0	0	0	0	0	0	0	0	0	0	0	0
0b779ac11b29ec8da986ef2d90790e06	k__Fungi	p__unidentified	c__unidentified	o__unidentified	f__unidentified	g__unidentified	s__unidentified	0	0	0	0	0	0	0	0	0	0	0	0	0	0	0	0	0	0	0	0	0	0	0	0	0	0	0	0	0	0	0	0	0	0	0	0	0	0	0	0	0	0
0b7c5796a8f5de4594782d410dd37f9e	k__Fungi	p__unidentified	c__unidentified	o__unidentified	f__unidentified	g__unidentified	s__unidentified	0	0	0	0	0	0	0	0	0	0	0	0	0	0	0	0	0	0	0	0	0	0	0	0	0	0	0	0	0	0	0	0	0	0	0	0	0	0	0	0	0	0
0b7d05a801a0f633aee9ebffadc9f21e	k__Fungi	p__unidentified	c__unidentified	o__unidentified	f__unidentified	g__unidentified	s__unidentified	0	3	0	0	0	0	0	0	0	0	0	0	0	0	0	0	0	0	0	0	0	0	0	0	0	0	0	0	0	0	0	0	0	0	0	0	0	0	0	0	0	0
0b805533fc3a6ec7fe11d5c912aa2d1e	k__Fungi	p__unidentified	c__unidentified	o__unidentified	f__unidentified	g__unidentified	s__unidentified	0	0	0	0	0	0	0	0	0	0	0	0	0	0	0	0	0	0	0	0	0	0	0	0	0	0	0	0	0	0	0	0	0	0	0	0	0	0	0	0	0	0
0b82c6aacb1543ed369ab5b0c2e46c9c	k__Fungi	p__Ascomycota	c__Leotiomycetes	o__Helotiales	f__Helotiales_fam_Incertae_sedis	g__Volucrispora	s__Volucrispora_graminea	0	0	0	0	0	0	0	0	0	0	0	0	0	0	0	0	0	0	0	0	0	0	0	0	0	0	0	0	0	0	0	0	0	0	0	0	0	0	0	0	0	0
0b851e2d1e83a8a8e5902b31b9cba2b1	k__Fungi	p__unidentified	c__unidentified	o__unidentified	f__unidentified	g__unidentified	s__unidentified	0	0	0	0	0	0	0	0	0	0	0	0	0	0	0	0	0	0	0	0	0	0	0	0	0	0	0	0	0	0	0	0	0	0	0	0	0	0	0	0	0	0
0b85bcbe5179f62e31bd903f2e9d538d	k__Fungi	p__Ascomycota	c__Sordariomycetes	o__Hypocreales	f__Nectriaceae	g__Fusarium	s__Fusarium_fujikuroi	0	0	0	0	0	0	0	0	42	0	0	0	0	0	0	0	0	0	0	0	0	0	0	0	0	0	0	0	0	0	0	0	0	0	0	0	0	0	0	0	0	0
0b87f00098be4954d88982eb7626c933	k__Fungi	p__unidentified	c__unidentified	o__unidentified	f__unidentified	g__unidentified	s__unidentified	0	0	0	0	0	0	0	7	0	0	0	0	0	0	0	0	0	0	0	0	0	0	0	0	0	0	0	0	0	0	0	0	0	0	0	0	0	0	0	0	0	0
0b8ff41c055ecaf39649c72fd58d8353	k__Fungi	p__Chytridiomycota	c__unidentified	o__unidentified	f__unidentified	g__unidentified	s__unidentified	0	0	0	0	0	0	21	3	0	0	0	0	0	0	0	0	0	0	0	0	0	0	0	0	0	0	0	0	0	0	0	0	0	0	0	0	0	27	0	0	0	0
0b8ff901bb4cf37d04f1b44cb5922ffd	k__Fungi	p__Chytridiomycota	c__unidentified	o__unidentified	f__unidentified	g__unidentified	s__unidentified	0	0	0	0	0	0	0	0	0	0	0	0	0	0	0	0	0	0	0	0	0	0	0	0	0	0	0	0	0	0	0	0	0	0	0	0	0	0	0	0	0	0
0b91239d977df0d2b04b245c9a6f4f35	k__Fungi	p__unidentified	c__unidentified	o__unidentified	f__unidentified	g__unidentified	s__unidentified	0	0	0	0	0	0	0	0	0	0	0	0	0	0	0	0	0	0	0	0	0	0	0	0	0	0	0	0	0	0	0	0	0	0	0	0	0	0	0	0	0	0
0b91e0407e1a0468a96bd80258393e02	k__Fungi	p__unidentified	c__unidentified	o__unidentified	f__unidentified	g__unidentified	s__unidentified	0	0	0	0	0	0	0	0	0	0	0	0	0	0	0	0	0	0	0	0	0	0	0	0	0	0	0	0	0	0	0	0	0	0	0	0	0	0	0	0	0	0
0b92f1683460ebb39c11d7762c488633	k__Fungi	p__Chytridiomycota	c__unidentified	o__unidentified	f__unidentified	g__unidentified	s__unidentified	0	0	0	0	0	0	0	0	0	0	0	0	0	0	0	0	0	0	0	0	0	0	0	0	0	0	0	0	0	0	0	0	0	0	0	0	0	0	0	0	0	0
0b990784cf72050f9a244b84616d52f8	k__Fungi	p__unidentified	c__unidentified	o__unidentified	f__unidentified	g__unidentified	s__unidentified	0	0	0	0	0	0	0	0	0	0	0	0	0	0	0	0	0	0	0	0	0	0	0	0	0	0	0	0	0	0	0	0	0	0	0	0	0	0	0	0	0	0
0ba05ae22f9849267622fc4cb7f4c5ed	k__Fungi	p__unidentified	c__unidentified	o__unidentified	f__unidentified	g__unidentified	s__unidentified	0	0	0	0	0	0	0	0	0	0	0	0	0	0	0	0	0	0	0	0	0	0	0	0	0	0	0	0	0	0	0	0	0	0	0	0	0	0	0	0	0	0
0ba2f567df5506df9a831c23170920d2	k__Fungi	p__unidentified	c__unidentified	o__unidentified	f__unidentified	g__unidentified	s__unidentified	0	0	0	0	0	0	0	0	0	0	0	0	0	0	0	0	0	0	0	0	0	0	0	0	0	0	0	0	0	0	0	0	0	0	0	0	0	0	0	0	0	0
0ba44b39a19024211d2e17fe54db0973	k__Fungi	p__Ascomycota	c__Sordariomycetes	o__Togniniales	f__Togniniaceae	g__Phaeoacremonium	s__unidentified	0	0	0	0	0	0	0	0	0	0	0	0	0	0	0	0	0	0	0	0	0	0	0	0	0	0	0	0	0	0	0	0	0	0	0	0	0	0	0	0	0	0
0ba65218dd123678bfcd735010916098	k__Fungi	p__unidentified	c__unidentified	o__unidentified	f__unidentified	g__unidentified	s__unidentified	0	0	0	0	0	0	0	0	0	0	0	0	0	0	0	0	0	0	0	0	0	128	0	0	0	0	0	0	0	0	0	0	0	0	0	0	0	0	0	0	0	0
0ba7862a5f2f569b47c8f61fcda68cfe	k__Fungi	p__unidentified	c__unidentified	o__unidentified	f__unidentified	g__unidentified	s__unidentified	0	0	0	0	0	0	0	0	10	0	0	0	0	0	0	0	0	0	0	0	0	0	0	0	0	0	0	0	0	0	0	0	0	0	0	0	0	0	0	0	0	0
0bab4b221f04c451785fd361bb666696	k__Fungi	p__unidentified	c__unidentified	o__unidentified	f__unidentified	g__unidentified	s__unidentified	0	0	0	0	0	0	0	0	0	0	0	0	6	0	0	0	0	0	0	0	0	0	0	0	0	0	0	0	0	0	0	0	0	0	0	0	0	0	0	0	0	0
0bab52bcaa76d318d077a2de8c09ddd7	k__Fungi	p__unidentified	c__unidentified	o__unidentified	f__unidentified	g__unidentified	s__unidentified	0	0	0	0	0	0	0	0	0	0	0	0	0	0	0	0	0	0	0	0	0	0	0	0	0	0	0	0	0	0	0	0	0	0	0	0	0	0	0	0	0	0
0bab5862e9a07be91860790b74a69344	k__Fungi	p__unidentified	c__unidentified	o__unidentified	f__unidentified	g__unidentified	s__unidentified	0	0	0	0	0	0	0	0	0	0	0	0	0	0	0	0	0	0	0	0	0	0	0	0	0	0	0	0	0	0	0	0	0	0	0	0	0	0	0	0	0	0
0bad5ecd3a518ba1e10d779bbe96af8c	k__Fungi	p__unidentified	c__unidentified	o__unidentified	f__unidentified	g__unidentified	s__unidentified	0	0	0	0	0	0	0	0	0	0	0	0	0	0	0	0	0	0	0	0	0	0	0	0	0	0	0	0	0	0	0	0	0	0	0	0	0	0	0	0	0	0
0bafd683c49b7baf9b2fd9fa197df5ec	k__Fungi	p__unidentified	c__unidentified	o__unidentified	f__unidentified	g__unidentified	s__unidentified	0	0	0	0	0	0	0	0	0	0	0	0	0	0	0	0	0	0	0	0	0	0	0	0	0	0	0	0	0	0	0	0	0	0	0	0	0	0	0	0	0	0
0bb31ceae6b13df9d0b68831e1d2d695	k__Fungi	p__unidentified	c__unidentified	o__unidentified	f__unidentified	g__unidentified	s__unidentified	0	0	0	0	0	0	0	0	0	0	0	0	0	0	0	0	0	0	0	0	10	0	0	0	0	0	0	0	0	0	0	0	0	0	0	0	0	0	0	0	0	0
0bb54fa271a02e0e550b3e266f6c186c	k__Fungi	p__unidentified	c__unidentified	o__unidentified	f__unidentified	g__unidentified	s__unidentified	0	0	0	0	0	0	0	0	0	0	0	0	0	0	0	0	0	0	0	0	0	0	0	0	0	0	0	0	0	0	0	0	0	0	0	0	0	0	0	0	0	0
0bb5fa982acdf0479a880b1b40594f17	k__Fungi	p__unidentified	c__unidentified	o__unidentified	f__unidentified	g__unidentified	s__unidentified	0	0	0	0	0	0	0	0	0	0	0	0	0	0	0	0	0	0	0	0	0	0	0	0	0	0	0	0	0	0	0	0	0	0	0	0	0	0	0	0	0	0
0bb7ce72a7047e44467dff0ff1d89bdd	k__Fungi	p__unidentified	c__unidentified	o__unidentified	f__unidentified	g__unidentified	s__unidentified	0	0	0	0	0	0	0	0	0	0	0	0	0	0	16	0	0	0	0	0	0	0	0	0	0	0	0	0	0	0	0	0	0	0	0	0	0	0	0	0	0	0
0bb9fe941d973423e242dbf67741faec	k__Fungi	p__unidentified	c__unidentified	o__unidentified	f__unidentified	g__unidentified	s__unidentified	0	0	0	0	0	0	0	0	0	0	0	0	0	0	0	0	0	0	0	0	0	0	0	0	0	0	0	0	0	0	0	0	0	0	0	0	0	0	0	0	0	0
0bc0a33d84208e5d4e5b0e6c7305fdf5	k__Fungi	p__Chytridiomycota	c__unidentified	o__unidentified	f__unidentified	g__unidentified	s__unidentified	0	0	0	0	0	0	0	0	0	0	0	0	0	0	0	0	0	0	0	0	0	0	0	0	0	0	0	0	0	0	0	0	0	0	0	0	0	0	0	0	0	0
0bc306acab95649c9471cc567fa7877d	k__Fungi	p__Ascomycota	c__Dothideomycetes	o__Capnodiales	f__Mycosphaerellaceae	g__Zymoseptoria	s__unidentified	0	0	0	0	0	0	0	0	0	0	0	0	0	0	0	0	0	0	0	0	0	0	0	0	0	0	0	0	0	0	0	0	0	0	0	0	0	0	0	0	0	0
0bcacad94f7c0a85cb3d613f7fabe02d	k__Fungi	p__unidentified	c__unidentified	o__unidentified	f__unidentified	g__unidentified	s__unidentified	0	0	0	0	0	0	0	0	0	0	0	0	0	0	0	0	0	0	0	0	0	0	0	0	0	0	0	0	0	0	0	0	0	0	0	0	0	0	0	0	0	0
0bce4c5535cd4d5edc680e05d849c534	k__Fungi	p__unidentified	c__unidentified	o__unidentified	f__unidentified	g__unidentified	s__unidentified	0	0	0	0	0	0	0	0	0	0	0	0	0	0	0	0	0	0	0	0	0	0	0	0	0	0	0	0	0	0	0	0	0	0	0	0	0	0	0	0	0	0
0bceacf348da4dbf8fe68a6545ae36e9	k__Fungi	p__unidentified	c__unidentified	o__unidentified	f__unidentified	g__unidentified	s__unidentified	0	0	0	0	0	0	0	0	0	0	0	0	0	0	0	0	0	0	0	0	0	0	0	0	0	0	0	0	0	0	0	0	0	0	0	0	0	0	0	0	0	0
0bd675acd2e4e39ca8ef02cb23dece1d	k__Fungi	p__unidentified	c__unidentified	o__unidentified	f__unidentified	g__unidentified	s__unidentified	0	0	0	0	0	0	0	0	0	0	0	0	0	0	0	0	0	0	0	0	0	0	0	0	0	0	0	0	0	0	0	0	0	0	0	0	0	0	0	0	0	0
0bd719d9cbadbff26582f6f98c5c127b	k__Fungi	p__Rozellomycota	c__unidentified	o__unidentified	f__unidentified	g__unidentified	s__unidentified	0	0	0	0	0	0	0	0	0	0	0	0	0	0	0	0	0	0	0	0	0	0	0	0	0	0	0	0	0	0	0	0	0	0	0	0	0	0	0	0	0	0
0bd757c293e72eb075e81bf72b0b53cf	k__Fungi	p__unidentified	c__unidentified	o__unidentified	f__unidentified	g__unidentified	s__unidentified	0	0	13	0	0	0	0	0	0	0	0	0	0	0	0	0	0	0	0	0	0	0	0	0	0	0	0	0	0	0	0	0	0	0	0	0	0	0	0	0	0	0
0bdb7e1dc3fa341b7d49d0b40f1e2b23	k__Fungi	p__Ascomycota	c__Dothideomycetes	o__Capnodiales	f__Teratosphaeriaceae	g__Capnobotryella	s__unidentified	0	0	0	0	0	0	0	0	0	0	0	0	0	0	0	0	0	0	0	0	0	0	0	0	0	0	0	0	0	0	0	0	0	0	0	0	0	0	0	0	0	0
0be10ad2e6bd8a036a8a3f2d24d70166	k__Fungi	p__unidentified	c__unidentified	o__unidentified	f__unidentified	g__unidentified	s__unidentified	0	0	0	0	0	0	0	0	0	0	0	0	0	0	0	0	0	0	0	0	0	0	0	0	0	0	0	0	0	0	0	0	0	0	0	0	0	0	0	0	0	0
0bec569fe71ce75bc274f8d0bc3ef577	k__Fungi	p__unidentified	c__unidentified	o__unidentified	f__unidentified	g__unidentified	s__unidentified	0	0	0	0	0	0	0	0	0	0	0	0	0	0	0	0	0	0	0	0	0	0	0	0	0	0	0	0	0	0	0	0	0	0	0	0	0	0	0	0	0	0
0bed52bfe6ef5c3ce554054df650441b	k__Fungi	p__unidentified	c__unidentified	o__unidentified	f__unidentified	g__unidentified	s__unidentified	0	0	0	8	0	0	0	0	0	0	0	0	0	0	0	0	0	0	0	0	0	0	0	0	0	0	0	0	0	0	0	0	0	0	0	0	0	0	0	0	0	0
0bf09119d62a0604f0ea64f6fb63604b	k__Fungi	p__unidentified	c__unidentified	o__unidentified	f__unidentified	g__unidentified	s__unidentified	0	0	0	0	0	0	0	0	0	0	0	0	0	0	0	0	0	0	0	0	0	0	0	0	0	0	0	0	0	0	0	0	0	0	0	0	0	0	0	0	0	0
0bf1327398219ec23a01dbef2e34d5c2	k__Fungi	p__unidentified	c__unidentified	o__unidentified	f__unidentified	g__unidentified	s__unidentified	0	0	0	0	0	0	0	0	0	0	0	0	0	0	0	0	0	0	0	0	0	0	0	0	0	0	0	0	0	0	0	0	0	12	0	0	0	0	0	0	0	0
0bfe6fe8f683ffe5bc2e0d01c9255170	k__Fungi	p__unidentified	c__unidentified	o__unidentified	f__unidentified	g__unidentified	s__unidentified	0	0	0	0	0	0	0	0	0	0	0	0	0	0	0	0	0	0	0	0	0	0	0	0	0	0	0	0	0	0	0	0	0	0	0	0	0	0	0	0	0	0
0bff976e929cc04ca98d44e137da072d	k__Fungi	p__unidentified	c__unidentified	o__unidentified	f__unidentified	g__unidentified	s__unidentified	0	0	0	0	0	0	0	0	0	0	0	0	0	0	0	0	0	0	0	0	0	21	0	0	0	0	0	0	0	0	0	0	0	0	0	0	0	0	0	0	0	0
0c054e81952350159261421f2256623a	k__Fungi	p__unidentified	c__unidentified	o__unidentified	f__unidentified	g__unidentified	s__unidentified	0	0	0	0	0	0	0	0	0	0	0	0	0	0	0	0	0	0	0	0	0	0	0	0	0	0	0	0	0	0	0	0	0	0	0	0	0	0	0	0	0	0
0c06a7e44ef11492056fdaeb421f9f37	k__Fungi	p__unidentified	c__unidentified	o__unidentified	f__unidentified	g__unidentified	s__unidentified	0	0	0	0	0	0	0	0	0	0	0	0	0	0	0	0	0	0	0	0	0	0	0	0	0	0	0	0	0	0	0	0	0	0	0	0	0	0	0	0	0	0
0c081a8ba62aa9fd459f220ec4052e18	k__Fungi	p__unidentified	c__unidentified	o__unidentified	f__unidentified	g__unidentified	s__unidentified	0	0	0	0	0	0	0	0	0	0	0	0	0	0	0	0	0	0	0	0	0	0	0	0	0	0	0	0	0	0	0	0	0	0	0	0	0	0	0	0	0	0
0c0a644a3763444c0d00dddd65f7c5d7	k__Fungi	p__unidentified	c__unidentified	o__unidentified	f__unidentified	g__unidentified	s__unidentified	0	0	0	0	0	0	0	0	0	0	0	0	0	0	0	0	0	0	0	0	0	0	0	0	0	0	0	0	0	0	0	0	0	0	0	0	0	0	0	0	0	0
0c0b216e4b2a2443045f22fe2169eebe	k__Fungi	p__Ascomycota	c__Leotiomycetes	o__Helotiales	f__Helotiaceae	g__Tetracladium	s__unidentified	0	0	0	0	0	0	0	0	0	0	0	0	0	0	0	0	0	0	0	0	0	0	0	0	0	0	0	0	0	0	0	0	0	0	0	0	0	0	0	0	0	0
0c0c981455c66d8fea644fc73574ec15	k__Fungi	p__unidentified	c__unidentified	o__unidentified	f__unidentified	g__unidentified	s__unidentified	0	0	0	0	0	0	0	0	0	0	0	0	0	0	0	0	0	0	0	0	0	0	0	0	0	0	0	0	0	0	0	0	0	0	0	0	0	0	0	0	0	0
0c105172114dc0d7e3313ce34b0c7ca1	k__Fungi	p__Ascomycota	c__Leotiomycetes	o__Helotiales	f__Leotiaceae	g__Alatospora	s__Alatospora_acuminata	0	0	0	0	0	0	0	0	0	0	0	0	0	0	0	0	0	0	0	4	0	0	0	0	0	0	0	0	0	0	0	0	0	0	0	0	0	0	0	0	0	0
0c11cfb24c688fdb0f7b4f8292a8a089	k__Fungi	p__Basidiomycota	c__unidentified	o__unidentified	f__unidentified	g__unidentified	s__unidentified	0	0	0	0	0	0	0	0	0	0	0	0	7	0	0	0	0	0	0	0	0	0	0	0	0	0	0	0	0	0	0	0	0	0	0	0	0	0	0	0	0	0
0c1e6b0e802a215b5409443f015794d6	k__Fungi	p__Basidiomycota	c__unidentified	o__unidentified	f__unidentified	g__unidentified	s__unidentified	0	0	0	0	0	0	0	0	0	0	0	0	0	0	0	0	0	0	0	0	0	0	0	0	0	0	0	0	0	0	0	0	0	21	0	0	0	0	0	0	0	0
0c2596c23cafeceba630ab401bb9d1a8	k__Fungi	p__Chytridiomycota	c__unidentified	o__unidentified	f__unidentified	g__unidentified	s__unidentified	0	0	0	0	0	0	0	0	0	0	0	0	0	0	0	0	0	0	0	0	0	0	0	0	0	0	0	0	0	0	0	0	0	0	0	0	0	0	0	0	0	0
0c271a8345ebb58706fea2959c3ed9cc	k__Fungi	p__Ascomycota	c__Dothideomycetes	o__Pleosporales	f__Phaeosphaeriaceae	g__Juncaceicola	s__unidentified	0	0	0	0	0	0	0	0	0	0	0	0	0	0	0	0	0	0	0	0	0	0	0	0	0	0	0	0	0	0	0	0	0	0	0	0	0	0	0	0	0	0
0c339709fc84e7c609cee6f434be0c3e	k__Fungi	p__unidentified	c__unidentified	o__unidentified	f__unidentified	g__unidentified	s__unidentified	0	0	0	0	0	0	0	0	0	0	0	0	0	0	0	0	0	0	0	0	0	0	0	0	0	0	0	0	0	0	0	0	0	0	0	0	0	0	0	0	0	0
0c3626b6666c0a485a86e18114ec9acd	k__Fungi	p__Rozellomycota	c__unidentified	o__unidentified	f__unidentified	g__unidentified	s__unidentified	0	0	0	0	0	0	0	0	0	0	0	0	0	0	0	0	0	0	0	0	0	0	0	0	0	0	0	0	0	0	0	0	0	0	0	0	0	0	0	0	0	0
0c363917cd82ac91fb419c4af5b6af62	k__Fungi	p__unidentified	c__unidentified	o__unidentified	f__unidentified	g__unidentified	s__unidentified	0	0	0	0	0	0	0	0	0	0	0	0	0	0	0	0	0	0	0	0	0	0	0	0	0	0	0	0	0	0	0	0	0	0	0	0	0	0	0	0	0	0
0c38214b34a1b155556375b8b2534bef	k__Fungi	p__unidentified	c__unidentified	o__unidentified	f__unidentified	g__unidentified	s__unidentified	0	0	0	0	0	0	0	0	0	0	0	0	0	0	0	0	0	0	0	0	0	0	0	0	0	0	0	0	0	0	0	0	0	0	0	0	0	0	4	0	0	0
0c3de290a08f15260ddbcb72c283d607	k__Fungi	p__unidentified	c__unidentified	o__unidentified	f__unidentified	g__unidentified	s__unidentified	0	0	0	0	0	0	0	0	0	0	0	0	0	0	0	0	0	0	0	0	0	0	0	0	0	0	0	0	0	0	0	0	0	0	0	0	0	0	0	0	0	0
0c41eef76da50e6c1c75c350cf670108	k__Fungi	p__unidentified	c__unidentified	o__unidentified	f__unidentified	g__unidentified	s__unidentified	0	0	0	0	0	0	0	0	0	0	0	0	0	0	0	0	0	0	0	0	0	0	0	0	0	0	0	0	0	0	0	0	0	0	0	0	0	0	0	0	0	0
0c46e27003d619825c14f5399189409e	k__Fungi	p__unidentified	c__unidentified	o__unidentified	f__unidentified	g__unidentified	s__unidentified	0	0	0	0	0	0	0	0	0	0	0	0	0	0	0	0	0	0	0	0	0	0	0	0	0	0	0	0	0	0	0	0	0	0	0	0	0	0	0	0	0	0
0c5943a800202a14ca1e082798c10049	k__Fungi	p__unidentified	c__unidentified	o__unidentified	f__unidentified	g__unidentified	s__unidentified	0	0	0	0	0	0	0	0	0	0	0	0	0	0	0	0	0	0	0	0	0	0	0	0	0	0	0	0	0	0	0	0	0	0	0	0	0	0	0	0	0	0
0c5a62aaa72b2e35ec1f175c40ec7ec4	k__Fungi	p__unidentified	c__unidentified	o__unidentified	f__unidentified	g__unidentified	s__unidentified	0	0	0	0	0	0	0	0	7	0	0	0	0	0	0	0	0	0	0	0	0	0	0	0	0	0	0	0	0	0	0	0	0	0	0	0	0	0	0	0	0	0
0c5b8f025d1dc61a60bda46bc0bd514d	k__Fungi	p__Ascomycota	c__Leotiomycetes	o__Helotiales	f__Helotiales_fam_Incertae_sedis	g__Cadophora	s__Cadophora_luteo-olivacea	0	0	0	0	0	0	0	0	0	0	0	0	0	0	0	0	0	0	0	0	0	0	0	0	0	0	0	0	0	0	0	0	0	0	0	0	0	0	0	0	0	0
0c5d9567a4b48b513d8556fb6bab93e2	k__Fungi	p__unidentified	c__unidentified	o__unidentified	f__unidentified	g__unidentified	s__unidentified	0	0	0	0	0	0	0	0	0	0	0	0	0	0	0	0	0	0	0	0	0	0	0	0	0	0	0	0	0	0	0	0	0	0	0	0	0	0	0	0	0	0
0c5faba8cad2668a273753a3fec8e9e9	k__Fungi	p__unidentified	c__unidentified	o__unidentified	f__unidentified	g__unidentified	s__unidentified	0	0	0	0	0	0	0	0	0	0	0	0	0	0	0	0	0	0	0	0	0	0	0	0	0	0	0	0	0	0	0	0	0	0	0	0	0	0	0	0	0	0
0c601eb17b911a14728ba51339d7e5ca	k__Fungi	p__unidentified	c__unidentified	o__unidentified	f__unidentified	g__unidentified	s__unidentified	0	0	0	0	0	0	0	0	0	0	0	0	0	0	0	0	0	0	0	0	0	0	0	0	0	0	0	0	0	0	0	0	0	0	0	0	0	0	0	0	0	0
0c6020cfe4b707b544995253d40ca496	k__Fungi	p__unidentified	c__unidentified	o__unidentified	f__unidentified	g__unidentified	s__unidentified	0	0	0	0	0	0	0	0	0	0	0	0	0	0	0	0	0	0	0	0	0	0	0	0	0	0	0	0	0	0	0	0	0	0	0	0	0	0	0	0	0	0
0c61742dae3d1433c59fd7d36dc3afcb	k__Fungi	p__unidentified	c__unidentified	o__unidentified	f__unidentified	g__unidentified	s__unidentified	0	0	0	0	0	0	0	0	0	0	0	0	0	0	0	0	0	0	0	0	0	0	0	0	0	0	0	0	0	0	0	0	0	0	0	0	0	0	0	0	0	0
0c66f7f0876f68ecb6e506d9946798e9	k__Fungi	p__Ascomycota	c__Eurotiomycetes	o__Eurotiales	f__Aspergillaceae	g__Aspergillus	s__Aspergillus_heterocaryoticus	0	0	0	43	0	0	0	0	0	0	0	0	0	0	0	0	0	0	0	0	0	0	0	0	0	0	0	0	0	0	0	0	0	0	0	0	0	0	0	0	0	0
0c6953bcae4e6a844b2547ec394b4dfc	k__Fungi	p__unidentified	c__unidentified	o__unidentified	f__unidentified	g__unidentified	s__unidentified	0	0	0	0	0	0	0	0	0	0	0	0	0	0	0	0	0	0	0	0	0	0	0	0	0	0	0	0	0	0	0	0	0	0	0	0	0	0	0	0	0	0
0c6f1f4633a60b3a096cf103b5e5c6de	k__Fungi	p__unidentified	c__unidentified	o__unidentified	f__unidentified	g__unidentified	s__unidentified	0	0	0	0	0	0	0	0	0	0	0	0	0	0	0	0	0	0	0	0	0	0	0	0	0	0	0	0	0	0	0	0	0	0	0	0	0	0	0	0	0	0
0c71955905accf5c5bfcfbe754268ad3	k__Fungi	p__unidentified	c__unidentified	o__unidentified	f__unidentified	g__unidentified	s__unidentified	0	0	0	0	0	0	0	0	0	0	0	0	0	0	0	0	0	0	0	0	0	0	0	0	0	0	0	0	0	0	0	0	0	0	0	0	0	0	0	0	0	0
0c71ae4109ad750f6d67116092d0f5e4	k__Fungi	p__unidentified	c__unidentified	o__unidentified	f__unidentified	g__unidentified	s__unidentified	0	0	0	0	0	0	0	0	0	0	0	0	0	0	0	0	0	0	0	0	0	0	0	0	0	0	0	0	0	0	0	0	0	0	0	0	0	0	0	0	0	0
0c730b367b4b463c38fdfa4122f1d9ed	k__Fungi	p__unidentified	c__unidentified	o__unidentified	f__unidentified	g__unidentified	s__unidentified	0	0	0	0	0	0	0	0	0	0	0	0	0	0	0	0	0	0	0	0	0	0	0	0	0	0	0	0	0	0	0	0	0	0	0	0	0	0	0	0	0	0
0c76c78bb63ba1f811c10f0dfcbea1f5	k__Fungi	p__unidentified	c__unidentified	o__unidentified	f__unidentified	g__unidentified	s__unidentified	0	0	0	0	0	0	0	0	0	0	0	0	0	0	0	0	0	0	0	0	0	0	0	0	0	0	0	0	0	0	0	0	0	0	0	0	0	0	0	0	0	0
0c770825ce0e2cb2103326ac9d539bd3	k__Fungi	p__unidentified	c__unidentified	o__unidentified	f__unidentified	g__unidentified	s__unidentified	0	0	0	0	0	0	0	0	0	0	0	0	0	0	0	0	0	0	0	0	0	0	0	0	0	0	0	0	0	0	0	0	0	0	0	0	0	0	0	0	0	0
0c7c236d1d40d25219c8b59c4835b7d3	k__Fungi	p__unidentified	c__unidentified	o__unidentified	f__unidentified	g__unidentified	s__unidentified	0	0	0	0	0	0	0	0	0	0	0	0	0	0	0	0	0	0	0	0	0	0	0	0	0	0	0	0	0	0	0	0	0	0	0	0	0	0	0	0	0	0
0c7f0a7377c711d1fd4bdba0bdd81a2c	k__Fungi	p__unidentified	c__unidentified	o__unidentified	f__unidentified	g__unidentified	s__unidentified	0	0	0	0	0	0	0	0	0	0	0	0	0	0	0	0	0	0	0	0	0	0	0	0	0	0	0	0	0	0	0	0	0	0	0	0	0	0	0	0	0	0
0c877869b7a4bf982b948ca37fbb4b41	k__Fungi	p__Ascomycota	c__Lecanoromycetes	o__Trapeliales	f__Trapeliaceae	g__Placopsis	s__Placopsis_parellina	0	0	0	0	0	0	0	0	0	0	0	0	0	0	0	0	0	0	0	0	0	0	0	0	0	0	0	0	0	0	0	0	0	0	0	0	0	0	0	0	0	0
0c9c27380b949729d2697328f4067b8f	k__Fungi	p__unidentified	c__unidentified	o__unidentified	f__unidentified	g__unidentified	s__unidentified	0	0	0	0	0	0	0	0	0	0	0	0	0	0	0	0	0	0	0	0	0	0	0	0	0	0	0	0	0	0	0	0	0	0	0	0	0	0	0	0	0	0
0ca60b626c1d632066c9c82b8acd9835	k__Fungi	p__unidentified	c__unidentified	o__unidentified	f__unidentified	g__unidentified	s__unidentified	0	0	0	0	0	0	0	0	0	0	0	0	0	0	0	0	0	0	0	0	0	10	0	0	0	0	0	0	0	0	0	0	0	0	0	0	0	0	0	0	0	0
0ca741cc3d0439a0d260a42925f3af63	k__Fungi	p__Mortierellomycota	c__Mortierellomycetes	o__Mortierellales	f__Mortierellaceae	g__Mortierella	s__unidentified	0	0	0	0	0	0	0	0	0	0	0	0	0	0	96	0	0	0	0	0	0	0	0	0	0	0	0	0	0	0	0	0	0	0	0	0	0	0	0	0	0	0
0ca8f165517bd10eeffc6b3cf211e2eb	k__Fungi	p__unidentified	c__unidentified	o__unidentified	f__unidentified	g__unidentified	s__unidentified	0	0	0	0	0	0	0	0	0	0	0	0	0	0	0	0	0	0	0	0	0	0	0	0	0	0	0	0	0	0	0	0	0	0	0	0	0	0	0	0	0	0
0ca9e270f9cfb5cff3afbf68e5099ce6	k__Fungi	p__Basidiomycota	c__Tremellomycetes	o__Trichosporonales	f__Trichosporonaceae	g__unidentified	s__unidentified	0	0	0	0	0	0	0	0	0	0	0	0	0	0	0	0	0	0	0	0	0	0	0	0	0	0	0	0	0	0	0	0	0	0	0	0	0	0	0	0	0	0
0cac229edbaa6dcb38a8d0ed55f69d86	k__Fungi	p__unidentified	c__unidentified	o__unidentified	f__unidentified	g__unidentified	s__unidentified	0	0	0	0	0	0	0	0	0	0	0	0	0	0	0	0	0	0	0	0	0	0	0	0	0	0	0	0	0	0	0	0	0	0	0	0	0	0	0	0	0	0
0cacea369d407b07db2be2e5526d97fd	k__Fungi	p__unidentified	c__unidentified	o__unidentified	f__unidentified	g__unidentified	s__unidentified	0	0	0	0	0	0	0	0	0	0	0	0	0	0	0	0	0	0	0	0	0	0	0	0	0	0	0	0	0	0	0	0	0	0	0	0	0	0	0	0	0	0
0cae4fa5b9fcd28a7209f68865eb70bb	k__Fungi	p__unidentified	c__unidentified	o__unidentified	f__unidentified	g__unidentified	s__unidentified	0	0	0	0	0	0	0	0	0	0	0	0	0	0	0	0	0	0	0	0	5	0	0	0	0	0	0	0	0	0	0	0	0	0	0	0	0	0	0	0	0	0
0caea22fded59c5ac54fbfda37856471	k__Fungi	p__unidentified	c__unidentified	o__unidentified	f__unidentified	g__unidentified	s__unidentified	0	0	0	0	0	0	0	0	0	0	0	0	0	0	0	0	0	0	0	0	0	0	0	0	0	0	0	0	0	0	0	0	0	0	0	0	0	0	0	0	0	0
0cb00a0d7ee4167bcac87f996e8d6c40	k__Fungi	p__Chytridiomycota	c__unidentified	o__unidentified	f__unidentified	g__unidentified	s__unidentified	0	0	0	0	0	0	0	0	0	0	0	0	0	0	0	0	0	0	0	0	0	0	0	0	0	0	0	0	0	0	0	0	0	0	0	0	0	0	0	0	0	0
0cb2aa9ca364faa8a66506e63ac0d7cd	k__Fungi	p__unidentified	c__unidentified	o__unidentified	f__unidentified	g__unidentified	s__unidentified	0	0	0	0	0	0	0	0	0	0	0	0	0	0	0	0	0	0	0	0	0	0	0	0	0	0	0	0	0	0	0	0	0	0	0	0	0	0	0	0	0	0
0cbae55a1caaa793265fe08c07551dad	k__Fungi	p__Ascomycota	c__Lecanoromycetes	o__Lecanorales	f__Parmeliaceae	g__Usnea	s__Usnea_antarctica	0	0	0	0	0	0	0	0	0	0	0	0	0	0	0	0	0	0	0	0	0	0	0	0	0	0	0	0	0	0	0	0	0	0	0	0	0	0	0	0	0	0
0cbd9956d8024092614e913a61a8641d	k__Fungi	p__Chytridiomycota	c__unidentified	o__unidentified	f__unidentified	g__unidentified	s__unidentified	0	0	0	0	0	0	0	0	0	0	0	0	0	0	0	0	0	0	0	0	0	0	0	0	0	0	0	0	0	0	0	0	0	0	0	0	0	0	0	0	0	0
0cc0cea0f8b55b1b978e23f0be7d8752	k__Fungi	p__Ascomycota	c__Leotiomycetes	o__Helotiales	f__Helotiales_fam_Incertae_sedis	g__Xenopolyscytalum	s__Xenopolyscytalum_pinea	0	0	0	0	0	0	0	0	0	0	0	0	0	0	0	0	0	0	0	0	0	0	0	0	0	0	0	0	0	0	0	0	0	0	0	0	0	0	0	0	0	0
0cc5d92bd05784f3404b4277a36e7fb6	k__Fungi	p__unidentified	c__unidentified	o__unidentified	f__unidentified	g__unidentified	s__unidentified	0	0	0	0	0	0	0	0	0	0	0	0	0	0	0	0	0	0	0	0	0	0	0	0	0	0	0	0	0	0	0	0	0	0	0	0	0	0	0	0	0	0
0cccbfd406d4127a5e6d5c2e1c94a39f	k__Fungi	p__Basidiomycota	c__unidentified	o__unidentified	f__unidentified	g__unidentified	s__unidentified	0	0	0	0	0	0	0	0	0	0	0	0	0	0	0	0	0	0	0	0	0	0	0	0	0	0	0	0	0	0	0	0	0	0	0	0	0	0	0	0	0	0
0cd04156783d88eb7ef60988949627f6	k__Fungi	p__Mortierellomycota	c__Mortierellomycetes	o__Mortierellales	f__Mortierellaceae	g__Mortierella	s__unidentified	0	0	0	0	0	0	0	0	0	0	0	0	0	0	0	0	0	0	0	0	0	0	0	0	0	0	0	0	0	0	0	0	0	0	0	0	0	0	0	0	0	0
0cd2feb8f41bfa4bd88850a0a1831619	k__Fungi	p__Chytridiomycota	c__Rhizophydiomycetes	o__Rhizophydiales	f__unidentified	g__unidentified	s__unidentified	0	0	0	0	0	0	0	0	0	0	0	0	0	0	0	0	0	0	0	0	0	0	0	0	0	0	0	0	0	0	0	0	0	0	0	0	0	0	0	0	0	0
0cd96c6f1d16d3212aac23848c053c66	k__Fungi	p__Ascomycota	c__Lecanoromycetes	o__Peltigerales	f__Pannariaceae	g__Psoroma	s__Psoroma_saccharatum	0	0	0	0	0	0	0	0	0	0	0	0	0	0	0	0	0	0	0	0	0	0	0	0	0	0	0	0	0	0	0	0	0	0	0	0	0	0	0	0	0	0
0ce1035f5cb5a0d1f044ac03d987f3d2	k__Fungi	p__unidentified	c__unidentified	o__unidentified	f__unidentified	g__unidentified	s__unidentified	0	0	70	0	0	0	0	0	0	0	0	0	0	0	0	0	0	0	0	0	0	0	0	0	0	0	0	0	0	0	0	0	0	0	0	0	0	0	0	0	0	0
0ce2e81c887c25ce7caf9fb5bc5e3215	k__Fungi	p__unidentified	c__unidentified	o__unidentified	f__unidentified	g__unidentified	s__unidentified	0	0	0	0	0	0	0	0	0	0	0	0	0	0	0	0	0	0	0	0	0	0	0	0	0	0	0	0	0	0	0	0	0	0	0	0	0	0	0	0	0	0
0ceb04f5d93bec2aaaf9e2eabb2064e3	k__Fungi	p__Ascomycota	c__Eurotiomycetes	o__Eurotiales	f__Aspergillaceae	g__Aspergillus	s__unidentified	0	0	0	0	0	0	0	0	0	0	0	0	0	0	0	0	0	0	0	0	0	0	0	0	0	0	0	0	0	0	0	0	0	0	0	0	0	0	0	0	0	0
0cec4d768d46d736b9f8908a1ccbe2c6	k__Fungi	p__Mortierellomycota	c__Mortierellomycetes	o__Mortierellales	f__Mortierellaceae	g__Mortierella	s__Mortierella_zonata	0	0	0	0	0	0	0	0	0	0	0	0	0	0	0	0	0	0	0	0	0	0	0	0	0	0	0	0	0	0	0	0	0	0	0	0	0	0	0	0	0	0
0cedab18857126e679a2123ca709db66	k__Fungi	p__unidentified	c__unidentified	o__unidentified	f__unidentified	g__unidentified	s__unidentified	0	0	0	0	0	0	0	0	0	0	0	0	0	0	0	0	0	0	0	0	0	0	0	0	0	0	0	0	0	0	0	0	0	0	0	0	0	0	0	0	0	0
0cedfa555650ad8d52fc3e8eb086ec89	k__Fungi	p__unidentified	c__unidentified	o__unidentified	f__unidentified	g__unidentified	s__unidentified	0	0	0	0	0	0	0	0	0	0	0	0	0	0	0	0	0	0	0	0	0	0	0	0	0	0	0	0	0	0	0	0	0	0	0	0	0	0	0	0	0	0
0cf2d3a87f26cd82ab21f498c4b87720	k__Fungi	p__unidentified	c__unidentified	o__unidentified	f__unidentified	g__unidentified	s__unidentified	0	0	0	0	0	0	0	0	0	0	0	0	0	0	0	0	0	0	0	0	0	0	0	0	0	0	0	0	0	0	0	0	0	0	0	0	0	0	0	0	0	0
0cf4030451b4e694090951fc6f81079c	k__Fungi	p__Chytridiomycota	c__unidentified	o__unidentified	f__unidentified	g__unidentified	s__unidentified	0	0	0	0	0	0	0	0	0	0	0	0	0	0	0	0	0	0	0	0	0	0	0	0	0	0	0	0	0	0	0	0	0	0	0	0	0	0	0	0	0	0
0cf4cd1b500a1797a1117a3870ecf6f6	k__Fungi	p__Ascomycota	c__Leotiomycetes	o__Helotiales	f__Helotiaceae	g__Tetracladium	s__Tetracladium_setigerum	0	0	0	0	0	0	0	0	0	0	0	0	0	0	0	0	0	0	0	0	0	0	0	0	0	0	0	0	0	0	0	0	0	0	0	0	0	0	0	0	0	0
0cfbb5eb50781abb9ee84e3a8960af3d	k__Fungi	p__unidentified	c__unidentified	o__unidentified	f__unidentified	g__unidentified	s__unidentified	0	0	42	0	0	0	0	0	0	0	0	0	0	0	0	0	0	0	0	0	0	0	0	0	0	0	0	0	0	0	0	0	0	0	0	0	0	0	0	0	0	0
0d04314b61405bac02385087bd447b8f	k__Fungi	p__unidentified	c__unidentified	o__unidentified	f__unidentified	g__unidentified	s__unidentified	0	0	0	0	0	0	0	0	0	0	0	0	0	0	107	0	0	0	0	0	0	0	0	0	0	0	0	0	0	0	0	0	0	0	0	0	0	0	0	0	0	0
0d0a2e54bd20260d2f49fa6e20b984f8	k__Fungi	p__unidentified	c__unidentified	o__unidentified	f__unidentified	g__unidentified	s__unidentified	0	0	0	0	0	0	0	0	0	0	0	0	0	0	0	0	0	0	0	0	0	0	0	0	0	0	0	0	0	0	0	0	0	0	0	0	0	0	0	0	0	0
0d0b5b9d6a5e72afee2633366b608bbe	k__Fungi	p__unidentified	c__unidentified	o__unidentified	f__unidentified	g__unidentified	s__unidentified	0	0	0	0	0	0	0	0	0	0	0	0	0	0	0	0	0	0	0	0	0	0	0	0	0	0	0	0	0	0	0	0	0	0	0	0	0	0	0	0	0	0
0d0c9ddebe0ce07cad5b7d19ed8b0d93	k__Fungi	p__Basidiomycota	c__unidentified	o__unidentified	f__unidentified	g__unidentified	s__unidentified	0	0	0	0	0	0	0	0	0	0	0	0	0	0	0	0	0	0	0	0	0	0	0	0	0	0	0	0	0	0	0	0	0	0	0	0	0	0	0	0	0	0
0d13b2b7bdae03e7afffe991b3eb2634	k__Fungi	p__Ascomycota	c__Dothideomycetes	o__Capnodiales	f__Teratosphaeriaceae	g__Recurvomyces	s__unidentified	0	0	0	0	0	0	0	0	0	0	0	0	0	0	0	0	0	0	0	0	0	0	0	0	0	0	0	0	0	0	0	0	0	0	0	0	0	0	0	0	0	0
0d1450020a77e816fd7930d7941033b4	k__Fungi	p__unidentified	c__unidentified	o__unidentified	f__unidentified	g__unidentified	s__unidentified	0	0	0	0	0	0	0	0	0	0	0	0	0	0	0	0	0	0	0	0	0	0	0	0	0	0	0	0	0	0	0	0	0	0	0	0	0	0	0	0	0	0
0d1588f4f0a82852695f5851c1770136	k__Fungi	p__Ascomycota	c__Leotiomycetes	o__Thelebolales	f__Pseudeurotiaceae	g__Pseudogymnoascus	s__Pseudogymnoascus_destructans	0	0	0	0	0	0	0	0	0	0	0	0	0	0	0	0	0	0	0	0	0	0	0	0	0	0	0	0	0	0	0	0	0	0	0	0	0	0	0	0	0	0
0d1c374093558c7b7fd92887e606187f	k__Fungi	p__unidentified	c__unidentified	o__unidentified	f__unidentified	g__unidentified	s__unidentified	0	0	0	0	0	0	0	0	0	0	0	0	0	0	0	0	0	0	0	0	0	0	0	0	0	0	0	0	0	0	0	0	0	0	0	0	0	0	0	0	0	0
0d1dfd5011dfb33eb0526da9bb228e28	k__Fungi	p__Chytridiomycota	c__unidentified	o__unidentified	f__unidentified	g__unidentified	s__unidentified	0	0	0	0	0	0	0	0	0	0	0	0	0	0	0	0	0	0	0	0	0	0	0	0	0	0	0	0	0	0	0	0	0	0	0	0	0	0	0	0	0	0
0d1e1618d68a47cb68d061bf654f8a34	k__Fungi	p__unidentified	c__unidentified	o__unidentified	f__unidentified	g__unidentified	s__unidentified	0	0	0	0	0	0	0	0	0	0	0	0	0	0	0	0	0	0	0	0	0	0	0	0	0	0	0	0	0	0	0	0	0	0	0	0	0	0	0	0	0	0
0d1feaa58ec1ccc26e88125edfe3a7c5	k__Fungi	p__unidentified	c__unidentified	o__unidentified	f__unidentified	g__unidentified	s__unidentified	0	0	0	0	0	0	0	0	0	0	0	0	0	0	0	0	0	0	0	0	0	0	0	0	0	0	0	0	0	0	0	0	0	0	0	0	0	0	0	0	0	0
0d23ae166a896a18885ac7d09d04e052	k__Fungi	p__Ascomycota	c__Leotiomycetes	o__Helotiales	f__Helotiaceae	g__Tetracladium	s__unidentified	0	0	0	0	0	0	0	0	0	0	0	0	0	0	0	0	0	0	0	0	0	0	0	0	0	0	0	0	0	0	0	0	0	0	0	0	0	0	0	0	0	0
0d28e15618c259f20249897693da19da	k__Fungi	p__unidentified	c__unidentified	o__unidentified	f__unidentified	g__unidentified	s__unidentified	0	0	27	0	0	0	0	0	0	0	0	0	0	0	0	0	0	0	0	0	0	0	0	0	0	0	0	0	0	0	0	0	0	0	0	0	0	0	0	0	0	0
0d30a5677afe5e202c62b8f983ca69f1	k__Fungi	p__unidentified	c__unidentified	o__unidentified	f__unidentified	g__unidentified	s__unidentified	0	0	0	0	0	0	0	0	0	0	0	0	0	0	0	0	0	0	0	0	0	0	0	0	0	0	0	0	0	0	0	0	0	0	0	0	0	0	0	46	0	0
0d31723d11544f3d4e2a0cb086e68cb5	k__Fungi	p__unidentified	c__unidentified	o__unidentified	f__unidentified	g__unidentified	s__unidentified	0	0	0	0	0	0	0	0	0	0	0	0	0	0	0	0	0	0	0	0	0	0	0	0	0	0	0	0	0	0	0	0	0	0	0	0	0	5	0	0	0	0
0d327594a71d44619b7da03c44ee376f	k__Fungi	p__unidentified	c__unidentified	o__unidentified	f__unidentified	g__unidentified	s__unidentified	0	0	0	0	0	0	0	0	0	0	0	0	0	0	0	0	0	0	0	0	517	0	0	0	0	0	0	0	0	0	0	0	0	0	0	0	0	0	0	0	0	0
0d3c3a83b5cdfae8a12dbed7569e3dea	k__Fungi	p__unidentified	c__unidentified	o__unidentified	f__unidentified	g__unidentified	s__unidentified	0	0	0	0	0	0	0	0	0	0	0	0	0	0	0	0	0	0	0	0	0	0	0	0	0	0	0	0	0	0	0	0	0	0	0	0	0	0	0	0	0	0
0d45d0a2b3fec258f954f826af352651	k__Fungi	p__unidentified	c__unidentified	o__unidentified	f__unidentified	g__unidentified	s__unidentified	0	0	0	0	0	0	0	0	0	0	0	0	0	0	0	0	0	0	0	0	0	0	0	0	0	0	0	0	0	0	0	0	0	0	0	0	0	0	0	0	0	0
0d48bafa48e7083fc1edb908015c45f2	k__Fungi	p__unidentified	c__unidentified	o__unidentified	f__unidentified	g__unidentified	s__unidentified	0	0	0	0	0	0	0	0	0	0	0	0	0	0	0	0	0	0	0	0	0	0	0	0	0	0	0	0	0	0	0	0	0	0	0	0	0	0	0	0	0	0
0d4ca34b86f893528f344df427f273b1	k__Fungi	p__unidentified	c__unidentified	o__unidentified	f__unidentified	g__unidentified	s__unidentified	0	0	0	0	0	0	0	0	0	0	0	0	0	0	0	0	0	0	0	0	0	0	0	0	0	0	0	0	0	0	0	0	0	0	0	0	0	0	0	0	0	0
0d4daff98d3a69060769f4fa04e9ce69	k__Fungi	p__unidentified	c__unidentified	o__unidentified	f__unidentified	g__unidentified	s__unidentified	0	0	0	0	0	0	0	0	0	0	0	0	0	0	0	0	0	0	0	0	0	0	0	0	0	0	0	0	2	0	0	0	0	0	0	0	0	0	0	0	0	0
0d51594e184c3c41b057b8e446734ad3	k__Fungi	p__Ascomycota	c__Sordariomycetes	o__Hypocreales	f__Nectriaceae	g__Xenoacremonium	s__Xenoacremonium_falcatum	0	0	0	0	0	0	0	0	0	0	0	0	0	0	0	0	0	0	0	72	0	0	0	0	0	0	0	0	0	0	0	0	0	0	0	0	0	0	0	0	0	0
0d5380d0bfede3ef6a11f78532ba13d7	k__Fungi	p__unidentified	c__unidentified	o__unidentified	f__unidentified	g__unidentified	s__unidentified	0	0	0	0	0	0	0	0	0	0	0	0	0	0	0	0	0	0	0	0	0	0	0	0	0	0	0	0	0	0	0	0	0	0	0	0	0	0	0	0	0	0
0d565437e112c3613f104c92ceca8993	k__Fungi	p__Ascomycota	c__Eurotiomycetes	o__Chaetothyriales	f__Trichomeriaceae	g__Knufia	s__Knufia_karalitana	0	0	0	0	0	0	0	0	0	0	0	0	0	0	0	0	0	0	0	0	0	0	0	0	0	0	0	0	0	0	0	0	0	0	0	0	0	0	0	0	0	0
0d595163fb3ced39a005f0f44672c668	k__Fungi	p__unidentified	c__unidentified	o__unidentified	f__unidentified	g__unidentified	s__unidentified	0	0	0	0	0	0	0	0	0	0	0	0	0	0	0	0	0	0	0	0	0	0	0	0	0	0	0	0	0	0	0	0	0	0	0	0	0	0	0	0	0	0
0d59e1b325fb0968130795466f3260a5	k__Fungi	p__unidentified	c__unidentified	o__unidentified	f__unidentified	g__unidentified	s__unidentified	0	0	0	0	0	0	0	0	0	0	0	0	0	0	0	0	0	0	0	0	0	0	0	0	0	0	0	0	0	0	0	16	0	0	0	0	0	0	0	0	0	0
0d5c581b3b879cd5b990e35477884a3e	k__Fungi	p__unidentified	c__unidentified	o__unidentified	f__unidentified	g__unidentified	s__unidentified	0	0	0	0	0	0	0	0	0	0	0	0	0	0	0	0	0	0	0	0	74	0	0	0	0	0	0	0	0	0	0	0	0	0	0	0	0	0	0	0	0	0
0d614efe3d4df69c3cab2e5df3496178	k__Fungi	p__Ascomycota	c__Leotiomycetes	o__Thelebolales	f__Pseudeurotiaceae	g__Pseudogymnoascus	s__unidentified	0	0	0	0	0	0	0	0	0	0	0	0	0	0	0	0	0	0	0	0	0	0	0	0	0	0	0	0	0	0	0	0	0	0	0	0	0	0	0	0	0	0
0d631dd543bb6371c1a379b64d11bfc6	k__Fungi	p__unidentified	c__unidentified	o__unidentified	f__unidentified	g__unidentified	s__unidentified	0	0	0	0	0	0	0	0	0	0	0	0	0	0	0	0	0	0	0	0	0	0	0	0	0	0	0	0	0	0	0	0	0	0	0	0	0	0	0	0	0	0
0d649ac2b1f318dee9be91bf4dc78ce4	k__Fungi	p__unidentified	c__unidentified	o__unidentified	f__unidentified	g__unidentified	s__unidentified	0	0	0	0	0	0	0	0	0	0	0	0	0	0	0	0	0	0	0	0	0	0	0	0	0	0	0	0	0	0	0	0	0	0	0	6	0	0	0	0	0	0
0d69339e02979c89338e443e404cd9e8	k__Fungi	p__unidentified	c__unidentified	o__unidentified	f__unidentified	g__unidentified	s__unidentified	0	0	0	0	0	0	0	0	0	0	0	0	0	0	0	0	0	0	0	0	0	0	0	0	0	0	0	0	0	0	0	0	0	0	0	0	0	0	0	0	0	0
0d738a4090d51015f83f1702e5768eb7	k__Fungi	p__unidentified	c__unidentified	o__unidentified	f__unidentified	g__unidentified	s__unidentified	0	0	0	0	0	0	0	0	0	0	0	0	0	0	0	0	0	0	0	0	0	0	0	0	0	0	0	0	0	0	0	0	0	0	0	0	0	0	0	0	0	0
0d77ccc6e53b254ff9856804c8436b07	k__Fungi	p__Ascomycota	c__Eurotiomycetes	o__unidentified	f__unidentified	g__unidentified	s__unidentified	0	0	0	0	0	0	0	0	0	0	0	0	0	0	0	0	0	0	0	0	0	0	0	0	0	0	0	0	0	0	0	0	0	0	0	0	0	0	0	0	0	0
0d77fec6e8f394a43f31569654e085d9	k__Fungi	p__unidentified	c__unidentified	o__unidentified	f__unidentified	g__unidentified	s__unidentified	0	0	0	0	0	0	0	0	0	0	0	0	0	0	0	0	0	0	0	0	0	0	0	0	16	0	0	0	0	0	0	0	0	0	0	0	0	0	0	0	0	0
0d7b00932e93231974e114da29344dc2	k__Fungi	p__Chytridiomycota	c__unidentified	o__unidentified	f__unidentified	g__unidentified	s__unidentified	0	0	0	0	0	0	0	0	0	0	0	0	0	0	0	0	0	0	0	0	0	0	0	0	0	0	0	0	0	0	0	0	0	0	0	0	0	0	0	0	0	0
0d7bdaff8737dcf61249114627e060f0	k__Fungi	p__unidentified	c__unidentified	o__unidentified	f__unidentified	g__unidentified	s__unidentified	0	0	0	0	0	0	0	0	0	0	0	0	0	0	0	0	0	0	0	0	0	0	0	0	0	0	0	0	0	0	0	0	0	0	0	0	0	0	0	0	0	0
0d803ce2730db0a6f023ed1adf33718f	k__Fungi	p__unidentified	c__unidentified	o__unidentified	f__unidentified	g__unidentified	s__unidentified	0	0	0	0	0	0	0	0	0	0	0	0	0	0	0	0	0	0	0	0	0	0	0	0	0	0	0	0	0	0	0	0	0	0	0	0	0	0	0	0	0	0
0d819033606863ab1c2dfe0c9aad097b	k__Fungi	p__unidentified	c__unidentified	o__unidentified	f__unidentified	g__unidentified	s__unidentified	0	0	0	0	0	0	0	0	0	0	0	0	0	0	0	0	0	0	0	0	0	0	0	0	0	0	0	0	0	0	0	0	0	0	0	0	0	0	0	0	0	0
0d844f9157325265375267c26cf313b7	k__Fungi	p__Ascomycota	c__Lecanoromycetes	o__Lecanorales	f__Ramalinaceae	g__Bacidina	s__Bacidina_arnoldiana	0	0	0	0	0	0	0	0	0	0	0	0	0	0	73	0	0	0	0	0	0	0	0	0	0	0	0	0	0	0	0	0	0	0	0	0	0	0	0	0	0	0
0d8863100e9e13ca92925ee08b6d1e10	k__Fungi	p__unidentified	c__unidentified	o__unidentified	f__unidentified	g__unidentified	s__unidentified	0	0	0	0	0	0	0	0	0	0	0	0	0	0	0	0	0	0	0	0	0	0	0	0	0	0	0	0	0	0	0	0	0	0	0	0	0	0	0	0	0	0
0d924ec1df4019e6b132113bca1b91f8	k__Fungi	p__unidentified	c__unidentified	o__unidentified	f__unidentified	g__unidentified	s__unidentified	0	0	0	0	0	0	0	0	0	0	0	0	0	0	0	0	0	0	0	0	0	0	0	0	0	0	0	0	0	0	0	0	0	0	0	0	0	0	0	0	0	0
0d9798089ccc128f1edf7932a82db550	k__Fungi	p__unidentified	c__unidentified	o__unidentified	f__unidentified	g__unidentified	s__unidentified	0	0	0	0	0	0	0	0	0	0	0	0	0	0	0	0	0	0	0	0	0	0	0	0	0	0	0	0	0	0	0	0	0	0	0	0	0	0	0	0	0	0
0d97ec3c28c5fdbc5a4ad85ce8bb1174	k__Fungi	p__unidentified	c__unidentified	o__unidentified	f__unidentified	g__unidentified	s__unidentified	0	0	0	0	0	0	0	0	0	0	0	0	0	0	0	0	0	0	0	0	0	0	0	0	0	0	0	0	0	0	0	0	0	0	0	0	0	0	0	0	0	0
0d999906fdde300a81221cc94f082f9f	k__Fungi	p__unidentified	c__unidentified	o__unidentified	f__unidentified	g__unidentified	s__unidentified	0	0	0	0	0	0	0	0	0	0	0	0	0	0	0	0	0	0	0	0	0	0	0	0	0	0	0	0	0	0	0	0	0	0	0	0	0	0	0	0	0	0
0d9f3d958613ea301359a665cb32a13d	k__Fungi	p__Chytridiomycota	c__unidentified	o__unidentified	f__unidentified	g__unidentified	s__unidentified	0	0	0	0	0	0	0	0	0	0	0	0	0	0	0	0	0	0	0	0	0	0	0	0	0	0	0	0	0	0	0	0	0	0	0	0	0	0	0	0	0	0
0daa31f144565a77a9cb1b97ef6d1618	k__Fungi	p__Ascomycota	c__unidentified	o__unidentified	f__unidentified	g__unidentified	s__unidentified	0	0	0	0	0	0	0	0	0	0	0	0	0	0	0	0	0	0	0	0	0	0	0	0	0	0	0	0	0	0	0	0	0	0	0	0	0	0	0	0	0	0
0dad8ec4183db72678942594d629e514	k__Fungi	p__unidentified	c__unidentified	o__unidentified	f__unidentified	g__unidentified	s__unidentified	0	0	0	0	0	0	0	0	0	0	0	0	0	0	0	0	0	0	0	0	0	0	0	0	0	0	0	0	0	0	0	0	0	0	0	0	0	0	0	0	0	0
0daf429650e304b75e230e0cbe903ebc	k__Fungi	p__Basidiomycota	c__Microbotryomycetes	o__Kriegeriales	f__Camptobasidiaceae	g__Glaciozyma	s__Glaciozyma_litoralis	0	0	0	0	0	0	0	0	0	0	0	29	0	0	0	0	0	0	0	0	0	0	0	0	0	0	0	0	0	0	0	0	0	0	0	0	0	0	0	0	0	0
0db1f99aa371380adf3b68ca3d256d70	k__Fungi	p__unidentified	c__unidentified	o__unidentified	f__unidentified	g__unidentified	s__unidentified	0	0	0	0	0	0	0	0	0	0	0	0	0	0	0	0	0	0	0	0	0	0	0	0	0	0	0	0	0	0	0	0	0	0	0	0	0	0	0	0	0	0
0db292a1d121d64ed29e590b06a82d1f	k__Fungi	p__unidentified	c__unidentified	o__unidentified	f__unidentified	g__unidentified	s__unidentified	0	0	0	0	0	0	0	0	0	0	0	0	0	0	0	0	0	0	0	0	0	0	0	0	0	0	0	0	0	0	0	0	0	0	0	0	0	0	0	0	0	0
0db297faa3ca9899e7ffc43dfd123dd5	k__Fungi	p__unidentified	c__unidentified	o__unidentified	f__unidentified	g__unidentified	s__unidentified	0	0	0	0	0	0	0	0	0	0	0	0	0	0	0	0	0	0	0	0	0	0	0	0	0	0	0	0	0	0	0	0	0	0	0	0	0	0	0	0	0	0
0db43812c291bef3aa1feb71ecd21360	k__Fungi	p__unidentified	c__unidentified	o__unidentified	f__unidentified	g__unidentified	s__unidentified	0	0	0	0	0	0	0	0	0	0	0	0	0	0	0	0	0	0	0	0	0	0	0	0	0	0	0	0	0	0	0	0	0	0	0	0	0	0	0	0	0	0
0db856d802b3e3474652742780868fee	k__Fungi	p__unidentified	c__unidentified	o__unidentified	f__unidentified	g__unidentified	s__unidentified	0	0	0	0	0	0	0	0	0	0	0	0	0	0	0	0	0	0	0	0	0	0	0	0	0	0	0	0	0	0	0	0	0	0	0	0	0	0	0	0	0	0
0dbe434903f595e9420fbab8f6f221c7	k__Fungi	p__unidentified	c__unidentified	o__unidentified	f__unidentified	g__unidentified	s__unidentified	0	0	0	0	0	0	0	0	0	0	0	0	0	0	0	0	0	0	0	0	0	0	0	0	0	0	0	0	0	0	0	0	0	0	0	0	0	0	0	0	0	0
0dc6e5e935c74de6f6a6444637e49e63	k__Fungi	p__unidentified	c__unidentified	o__unidentified	f__unidentified	g__unidentified	s__unidentified	0	0	0	0	0	0	0	0	0	0	0	0	0	0	0	0	0	0	0	0	0	0	0	0	0	0	0	0	0	0	0	0	0	0	0	0	0	0	0	0	0	0
0dc8a6f88d0c09c264819b88ac3a286a	k__Fungi	p__Chytridiomycota	c__unidentified	o__unidentified	f__unidentified	g__unidentified	s__unidentified	0	0	0	0	0	0	0	0	0	0	0	0	0	0	0	0	0	0	0	0	0	0	0	0	0	0	0	0	0	0	0	0	0	0	0	0	0	0	0	0	0	0
0dd3ae553de5acf5622a8da5441028f9	k__Fungi	p__unidentified	c__unidentified	o__unidentified	f__unidentified	g__unidentified	s__unidentified	0	0	0	0	0	0	0	0	0	0	0	0	0	0	0	0	0	0	0	0	0	0	0	0	0	0	0	0	0	0	0	0	0	0	0	0	0	0	0	0	58	0
0dd5eac3d1033b84954d80016f6ff1eb	k__Fungi	p__unidentified	c__unidentified	o__unidentified	f__unidentified	g__unidentified	s__unidentified	0	0	0	0	0	0	0	0	0	0	0	0	0	0	0	0	0	0	0	0	0	0	0	0	0	0	0	0	0	0	0	0	0	0	0	0	0	0	0	0	0	0
0dd95fa34c380893cea06115ab99a730	k__Fungi	p__unidentified	c__unidentified	o__unidentified	f__unidentified	g__unidentified	s__unidentified	0	0	0	0	0	0	0	0	0	0	0	0	0	0	0	0	0	0	0	0	0	0	0	0	0	0	0	0	0	0	0	0	0	0	0	0	0	0	0	0	0	0
0de04375b33420dbfc6e2c41f3e87247	k__Fungi	p__Chytridiomycota	c__unidentified	o__unidentified	f__unidentified	g__unidentified	s__unidentified	0	0	0	0	0	0	0	0	0	0	0	0	0	0	0	0	0	0	0	0	0	0	0	0	0	0	0	0	0	0	0	0	0	0	0	0	0	0	0	0	0	0
0de8c79cf851115e1e03637e71cf5ce5	k__Fungi	p__unidentified	c__unidentified	o__unidentified	f__unidentified	g__unidentified	s__unidentified	0	0	0	0	0	0	0	0	0	0	0	0	0	0	0	0	0	0	0	0	0	0	0	0	0	0	0	0	0	0	0	0	0	0	0	0	0	0	0	0	0	0
0dee61cea78749b684c2da883b78d332	k__Fungi	p__unidentified	c__unidentified	o__unidentified	f__unidentified	g__unidentified	s__unidentified	0	0	0	0	0	0	0	0	0	0	0	0	0	0	0	0	0	0	0	0	0	0	0	0	0	0	0	0	0	0	0	0	0	0	0	0	0	0	0	0	0	0
0dee9faf077f3a82d58d58bfef5556f4	k__Fungi	p__unidentified	c__unidentified	o__unidentified	f__unidentified	g__unidentified	s__unidentified	0	0	0	0	0	0	0	0	0	0	0	0	0	0	0	0	0	0	0	0	0	0	0	0	0	0	0	0	0	0	0	0	0	0	0	0	0	0	0	0	0	0
0df7e82e253ac11e31c5c68b96e463d7	k__Fungi	p__Chytridiomycota	c__unidentified	o__unidentified	f__unidentified	g__unidentified	s__unidentified	0	0	0	0	0	0	0	0	0	0	0	0	0	0	0	0	0	0	0	0	0	0	0	0	0	0	0	0	0	0	0	0	0	0	0	0	0	0	0	0	0	0
0df8926c32df9c767b8d5fdef91fab43	k__Fungi	p__unidentified	c__unidentified	o__unidentified	f__unidentified	g__unidentified	s__unidentified	0	0	0	0	0	0	0	0	0	0	0	0	0	0	0	0	0	0	0	0	0	0	0	0	0	0	0	0	0	0	0	0	0	0	0	0	0	0	0	0	0	0
0e04c4e355f038f6a545c03a6a48dd8e	k__Fungi	p__unidentified	c__unidentified	o__unidentified	f__unidentified	g__unidentified	s__unidentified	0	0	0	0	0	0	0	0	0	0	0	0	0	0	0	0	0	0	0	0	0	0	0	0	0	0	0	0	0	0	0	0	0	0	0	0	0	0	0	0	0	0
0e06cd2983f66a8a145e86c66897bd00	k__Fungi	p__unidentified	c__unidentified	o__unidentified	f__unidentified	g__unidentified	s__unidentified	0	0	0	0	0	0	0	0	0	0	0	0	0	0	0	0	0	0	0	0	0	0	0	0	0	0	0	0	0	0	0	0	0	0	0	0	0	0	0	0	0	0
0e0ccbcdf3fa67aa06f2f558e6073483	k__Fungi	p__unidentified	c__unidentified	o__unidentified	f__unidentified	g__unidentified	s__unidentified	0	0	0	0	0	0	0	0	0	0	0	0	0	0	0	0	0	0	0	0	0	0	0	0	0	0	0	0	0	0	0	0	0	0	0	0	0	0	0	0	0	0
0e0f4c7bbab9e0c5cec43a3bbbf3c579	k__Fungi	p__Ascomycota	c__Leotiomycetes	o__Helotiales	f__Myxotrichaceae	g__Oidiodendron	s__Oidiodendron_truncatum	0	0	0	0	0	0	0	0	0	0	0	0	0	0	10	0	0	0	0	0	0	0	0	0	0	0	0	0	0	0	0	0	0	0	0	0	0	0	0	0	0	0
0e15a5b7520dab3c98a30f39f73b9f15	k__Fungi	p__unidentified	c__unidentified	o__unidentified	f__unidentified	g__unidentified	s__unidentified	0	0	0	0	0	0	0	0	0	0	0	0	0	0	0	0	0	0	0	0	0	0	0	0	0	0	0	0	0	0	0	0	0	0	0	0	0	0	0	0	0	0
0e1822c4fbaaf8a9254b0831ee097351	k__Fungi	p__unidentified	c__unidentified	o__unidentified	f__unidentified	g__unidentified	s__unidentified	0	0	0	0	0	0	0	0	0	0	0	0	0	0	0	0	0	0	0	0	0	0	0	0	0	0	0	0	0	0	0	0	0	0	0	0	0	0	0	0	0	0
0e207b397e22cc3ed7f0adcab7d107b7	k__Fungi	p__unidentified	c__unidentified	o__unidentified	f__unidentified	g__unidentified	s__unidentified	0	0	0	0	0	0	0	0	0	0	0	0	0	0	0	0	0	0	0	0	0	0	0	0	0	0	0	0	0	0	7	0	0	0	0	0	0	0	0	0	0	0
0e21e0020fbe8c367986daa77562ccc9	k__Fungi	p__Ascomycota	c__Eurotiomycetes	o__Eurotiales	f__Aspergillaceae	g__Aspergillus	s__Aspergillus_heterocaryoticus	0	0	0	46	0	0	0	0	0	0	0	0	0	0	0	0	0	0	0	0	0	0	0	0	0	0	0	0	0	17	0	0	0	0	0	0	0	0	0	0	0	0
0e221af56fd44290d95817fa180bc55e	k__Fungi	p__unidentified	c__unidentified	o__unidentified	f__unidentified	g__unidentified	s__unidentified	0	0	0	0	0	0	0	0	0	0	0	0	0	0	0	0	0	0	0	0	0	0	0	0	0	0	0	0	0	0	0	0	0	0	0	0	0	0	0	0	0	0
0e2895e4c7c6e7a425d3e5759c6b61a9	k__Fungi	p__unidentified	c__unidentified	o__unidentified	f__unidentified	g__unidentified	s__unidentified	0	0	0	0	0	0	0	0	0	0	0	0	0	0	0	0	0	0	0	0	0	0	0	0	0	0	0	0	0	0	0	0	0	0	0	0	0	0	0	0	0	0
0e2b0dd1f64af8815851ac8b30674b54	k__Fungi	p__unidentified	c__unidentified	o__unidentified	f__unidentified	g__unidentified	s__unidentified	0	0	0	0	0	0	0	0	0	0	0	0	0	0	0	0	0	0	0	0	0	0	0	0	0	0	0	0	0	0	0	0	0	0	0	0	0	0	0	0	0	0
0e35cd4ecfd111799fbffeb8703116d1	k__Fungi	p__Ascomycota	c__Leotiomycetes	o__Helotiales	f__Sclerotiniaceae	g__Sclerotinia	s__Sclerotinia_sclerotiorum	0	0	0	0	0	0	0	0	0	0	0	0	0	0	0	0	0	0	0	0	0	0	0	0	0	0	0	0	0	0	25	0	0	0	0	0	0	0	0	0	0	0
0e361ae113da21f4930622d78bbad392	k__Fungi	p__unidentified	c__unidentified	o__unidentified	f__unidentified	g__unidentified	s__unidentified	0	0	0	0	0	0	0	0	0	0	0	0	2	0	0	0	0	0	0	0	0	0	0	0	0	0	0	0	0	0	0	0	0	0	0	0	0	0	0	0	0	0
0e3644a098099fdc536161269a7349a6	k__Fungi	p__unidentified	c__unidentified	o__unidentified	f__unidentified	g__unidentified	s__unidentified	0	0	0	0	0	0	0	0	0	0	0	0	0	0	0	0	0	0	0	0	0	0	0	0	0	0	0	0	0	0	0	0	0	0	0	0	0	0	0	0	0	0
0e382c250173bbc81043f1bca5a4c79f	k__Fungi	p__unidentified	c__unidentified	o__unidentified	f__unidentified	g__unidentified	s__unidentified	0	0	0	0	0	0	0	0	0	0	0	0	0	0	0	0	0	0	0	0	0	0	0	0	0	0	0	0	0	0	0	0	0	0	0	0	0	0	0	0	0	0
0e38b46dfea209b20b570d36031c3f6f	k__Fungi	p__unidentified	c__unidentified	o__unidentified	f__unidentified	g__unidentified	s__unidentified	0	0	0	0	0	0	0	0	0	0	0	0	0	0	0	0	0	0	0	0	0	0	0	0	0	0	0	0	0	0	0	0	0	0	0	0	0	0	0	0	0	0
0e3ad9f74b7815a54690349548708789	k__Fungi	p__Chytridiomycota	c__unidentified	o__unidentified	f__unidentified	g__unidentified	s__unidentified	0	0	0	0	0	0	0	0	0	0	0	0	0	0	0	0	0	0	0	0	0	0	0	0	0	0	0	0	0	0	0	0	0	0	0	0	0	0	0	0	0	0
0e3c76c74439ddd3acc4f81a2796f683	k__Fungi	p__unidentified	c__unidentified	o__unidentified	f__unidentified	g__unidentified	s__unidentified	0	0	0	0	0	0	0	0	0	0	0	0	0	0	0	0	0	0	0	0	0	0	0	0	0	0	0	0	0	0	0	0	0	0	0	0	0	0	0	0	0	0
0e3e23a66f97a8b1de9bb9e02afb1d35	k__Fungi	p__unidentified	c__unidentified	o__unidentified	f__unidentified	g__unidentified	s__unidentified	0	0	0	0	0	0	0	0	0	0	0	0	0	0	0	0	0	0	0	0	0	0	0	0	0	0	0	0	0	0	0	0	0	0	0	0	0	0	0	0	0	0
0e3fc33f3e26a6c5ff80be503ac53860	k__Fungi	p__Chytridiomycota	c__unidentified	o__unidentified	f__unidentified	g__unidentified	s__unidentified	0	0	0	0	0	0	0	0	0	0	0	0	0	0	0	0	0	0	0	0	0	0	0	0	0	0	0	0	0	0	0	0	0	0	0	0	0	0	0	0	0	0
0e42be28415a315f2d31e10a1da05f91	k__Fungi	p__Chytridiomycota	c__unidentified	o__unidentified	f__unidentified	g__unidentified	s__unidentified	0	0	0	0	0	0	0	0	0	0	0	0	0	0	0	0	0	0	0	0	0	0	0	0	0	0	0	0	0	0	7	0	0	0	0	0	0	0	0	0	0	0
0e45989e6fa9662cc875cd26f3adbdf4	k__Fungi	p__unidentified	c__unidentified	o__unidentified	f__unidentified	g__unidentified	s__unidentified	0	0	0	0	0	0	0	0	0	0	0	0	0	0	0	0	0	0	0	0	0	0	0	0	0	0	0	0	0	0	0	0	0	0	0	0	0	0	0	0	0	0
0e4cc3fdd87fb1b608a5aad50ab9b7b3	k__Fungi	p__unidentified	c__unidentified	o__unidentified	f__unidentified	g__unidentified	s__unidentified	0	0	0	0	0	0	0	0	0	0	0	0	0	0	0	0	0	0	0	0	0	0	0	0	0	0	0	0	0	0	0	0	0	0	0	0	0	0	0	0	0	0
0e565dc99d5933f900262d4c0b7476d8	k__Fungi	p__unidentified	c__unidentified	o__unidentified	f__unidentified	g__unidentified	s__unidentified	0	0	0	0	0	0	0	0	0	0	0	0	0	0	0	0	0	0	0	0	0	0	0	0	0	0	0	0	0	0	0	0	0	0	0	0	0	0	0	0	0	0
0e58cce75ac41eb7b06ead95c50f8cc7	k__Fungi	p__Ascomycota	c__Leotiomycetes	o__Thelebolales	f__Pseudeurotiaceae	g__Pseudogymnoascus	s__Pseudogymnoascus_destructans	0	0	0	0	0	0	0	0	0	0	0	0	0	0	0	0	0	0	0	0	0	0	0	0	0	0	0	0	0	0	0	0	0	0	0	0	0	0	0	0	0	0
0e5a49fcf53b380c5aed59f0106e3340	k__Fungi	p__Ascomycota	c__Leotiomycetes	o__Helotiales	f__unidentified	g__unidentified	s__unidentified	0	0	0	0	0	0	0	0	0	0	0	0	0	0	0	0	0	0	0	0	0	0	0	0	0	0	0	0	0	0	0	0	0	0	0	0	0	0	0	0	0	0
0e5b1e3d46a182141d4af18f5f3b29b1	k__Fungi	p__unidentified	c__unidentified	o__unidentified	f__unidentified	g__unidentified	s__unidentified	0	0	0	0	0	0	0	0	0	0	0	0	0	0	0	0	0	0	0	0	0	0	0	0	0	0	0	0	0	0	0	0	0	0	0	0	0	0	0	0	0	0
0e62a2f18a44312930990804572334dd	k__Fungi	p__Ascomycota	c__Leotiomycetes	o__Thelebolales	f__Thelebolaceae	g__unidentified	s__unidentified	0	0	0	0	0	0	0	0	0	0	0	0	0	0	0	0	0	0	0	0	0	0	0	0	0	0	0	0	0	0	0	0	0	0	0	0	0	0	0	0	0	0
0e63124f578a50452aba528b042de113	k__Fungi	p__Ascomycota	c__Dothideomycetes	o__Pleosporales	f__Melanommataceae	g__unidentified	s__unidentified	0	0	0	0	0	0	0	0	0	0	0	0	0	0	0	0	0	0	0	0	0	0	0	0	0	0	0	0	0	0	0	0	0	0	0	0	0	0	0	0	0	0
0e67b6e67226c3a7f868632e63f7a3e8	k__Fungi	p__unidentified	c__unidentified	o__unidentified	f__unidentified	g__unidentified	s__unidentified	0	0	0	0	0	0	0	0	0	0	0	0	0	0	0	0	0	0	0	0	0	0	0	0	0	0	0	0	0	0	0	0	0	0	0	0	0	0	0	0	0	0
0e70c3cd3fe27aeaff423b35476cf020	k__Fungi	p__Ascomycota	c__Sordariomycetes	o__Microascales	f__Microascaceae	g__Cephalotrichum	s__Cephalotrichum_stemonitis	0	0	0	0	0	0	0	0	0	0	0	0	0	0	0	0	0	0	0	0	0	0	555	0	0	0	0	0	0	0	0	0	0	0	0	0	0	0	0	0	0	0
0e7c3b664b6b8431d5b6d7d6d3477004	k__Fungi	p__unidentified	c__unidentified	o__unidentified	f__unidentified	g__unidentified	s__unidentified	0	0	0	0	0	0	0	0	0	0	0	0	0	0	0	0	0	0	0	0	0	0	0	0	0	0	0	0	0	0	0	0	0	0	0	0	0	0	0	0	0	0
0e80fb781175036d7cc5321a53e9a211	k__Fungi	p__unidentified	c__unidentified	o__unidentified	f__unidentified	g__unidentified	s__unidentified	0	0	0	0	0	0	0	0	0	0	0	0	0	0	0	0	0	0	0	0	0	0	0	0	0	0	0	0	0	0	0	0	0	0	0	0	0	0	0	0	0	0
0e8455c6b38337328a66657e29356713	k__Fungi	p__unidentified	c__unidentified	o__unidentified	f__unidentified	g__unidentified	s__unidentified	0	0	0	0	0	0	0	0	0	0	0	0	0	0	0	0	0	0	0	0	0	0	0	0	0	2	0	0	0	0	0	0	0	0	0	0	0	0	0	0	0	0
0e87005f7550b348a3cbae839afeab55	k__Fungi	p__unidentified	c__unidentified	o__unidentified	f__unidentified	g__unidentified	s__unidentified	0	0	0	2	0	0	0	0	0	0	0	0	0	0	0	0	0	0	0	0	0	0	0	0	0	0	0	0	0	0	0	0	0	0	0	0	0	0	0	0	0	0
0e8b5af2d8dd873b229a7445c042cfa1	k__Fungi	p__unidentified	c__unidentified	o__unidentified	f__unidentified	g__unidentified	s__unidentified	0	0	0	0	0	0	0	0	0	0	0	0	0	0	0	0	0	0	0	0	0	0	0	0	0	0	0	0	0	0	0	0	0	0	0	0	0	0	0	0	0	0
0e8bd95f659eea8da04a855918b47e1d	k__Fungi	p__unidentified	c__unidentified	o__unidentified	f__unidentified	g__unidentified	s__unidentified	0	16	0	0	0	0	0	0	0	0	0	0	0	0	0	0	0	0	0	0	0	0	0	0	0	0	0	0	0	0	0	0	0	0	0	18	0	0	0	0	0	0
0e92b26d5dd9ceb7551ccbe6d7c6e6ad	k__Fungi	p__unidentified	c__unidentified	o__unidentified	f__unidentified	g__unidentified	s__unidentified	0	0	0	0	0	0	0	0	0	0	0	0	0	0	0	0	0	0	0	0	0	0	0	0	0	0	0	0	0	0	0	0	0	0	0	0	0	0	0	0	0	0
0e985a240c3d773ee6c0e387a6809008	k__Fungi	p__unidentified	c__unidentified	o__unidentified	f__unidentified	g__unidentified	s__unidentified	0	0	0	0	0	0	0	0	0	0	0	0	0	0	0	0	0	0	0	0	0	0	0	0	0	0	0	0	0	0	0	0	0	0	0	0	0	0	0	0	0	0
0e9913b91b8f16272fbe02e33726143f	k__Fungi	p__unidentified	c__unidentified	o__unidentified	f__unidentified	g__unidentified	s__unidentified	0	0	0	0	0	0	0	0	0	0	0	0	0	0	0	0	0	0	0	0	0	0	0	0	0	0	0	0	0	0	0	0	0	0	0	0	0	0	0	0	0	0
0e9a2f8698ae1fff28a415c7cb90c95c	k__Fungi	p__Ascomycota	c__Leotiomycetes	o__Helotiales	f__Helotiaceae	g__Tetracladium	s__unidentified	0	0	0	0	0	0	0	0	0	0	0	0	0	0	0	0	0	0	0	0	0	0	0	0	0	0	0	0	0	0	0	0	0	0	0	0	0	0	0	0	0	0
0e9ac4d9be7d0ff20e9ca7a2670b5aac	k__Fungi	p__unidentified	c__unidentified	o__unidentified	f__unidentified	g__unidentified	s__unidentified	0	0	0	0	0	0	0	0	0	0	0	0	0	0	0	0	0	0	0	0	0	0	4561	0	0	0	0	0	0	0	0	0	0	0	0	0	0	0	0	0	0	0
0e9b74f4f28058f6ebc19297e443b1e4	k__Fungi	p__unidentified	c__unidentified	o__unidentified	f__unidentified	g__unidentified	s__unidentified	0	0	0	7	0	0	0	0	0	0	0	0	0	0	0	0	0	0	0	0	0	0	0	0	0	0	0	0	0	0	0	0	0	0	0	0	0	0	0	0	0	0
0e9e64c3a13d0ce6751cc6c538e027f1	k__Fungi	p__unidentified	c__unidentified	o__unidentified	f__unidentified	g__unidentified	s__unidentified	0	0	0	0	0	0	0	0	0	0	0	0	0	0	0	0	0	0	0	0	0	0	0	0	0	1657	0	0	0	0	0	0	0	0	0	0	0	0	0	0	0	0
0ea3750e1f8a494b4d0d523f56209424	k__Fungi	p__unidentified	c__unidentified	o__unidentified	f__unidentified	g__unidentified	s__unidentified	0	0	0	0	0	0	0	0	0	0	0	0	0	0	0	0	0	0	0	0	0	0	0	0	0	0	0	0	0	0	0	0	0	0	0	0	0	0	0	0	0	0
0ea623b31263adb5afc8e5a65ec8bef2	k__Fungi	p__unidentified	c__unidentified	o__unidentified	f__unidentified	g__unidentified	s__unidentified	0	0	0	0	0	0	0	0	0	0	0	0	0	0	0	0	0	0	0	0	0	0	0	0	0	0	0	0	0	0	0	0	0	0	0	0	0	0	0	0	0	0
0eaa547340aee58ef4dbb52ebbbcb7a4	k__Fungi	p__Mortierellomycota	c__Mortierellomycetes	o__Mortierellales	f__Mortierellaceae	g__Mortierella	s__Mortierella_polygonia	0	0	0	0	0	0	0	57	0	0	0	0	0	0	0	0	0	0	0	0	0	0	0	0	0	0	0	0	0	0	0	0	0	0	0	0	0	0	0	0	0	0
0eab213a216fa80f1a4b0921edd12add	k__Fungi	p__Ascomycota	c__Sordariomycetes	o__Hypocreales	f__Cordycipitaceae	g__Parengyodontium	s__Parengyodontium_album	0	0	0	0	0	0	0	0	0	0	0	0	0	0	0	0	0	0	0	0	0	0	0	0	0	0	0	0	0	0	0	0	0	0	0	0	0	0	0	0	0	0
0eb208e560103c47a07bfc68e2969fd5	k__Fungi	p__unidentified	c__unidentified	o__unidentified	f__unidentified	g__unidentified	s__unidentified	0	0	0	0	0	0	0	0	0	0	0	0	0	0	0	0	0	0	0	0	0	0	0	0	0	0	0	0	0	0	0	0	0	0	0	0	0	0	0	0	0	0
0eb403ff1c0682087e53be8aaae8a6e9	k__Fungi	p__Mortierellomycota	c__Mortierellomycetes	o__Mortierellales	f__Mortierellaceae	g__Mortierella	s__Mortierella_antarctica	0	0	0	0	0	0	0	0	0	0	0	0	0	0	0	0	0	0	0	0	0	0	0	0	0	0	0	0	0	0	0	0	0	0	0	0	0	0	0	0	0	0
0eb470096bd918a2505c9eb61b862967	k__Fungi	p__unidentified	c__unidentified	o__unidentified	f__unidentified	g__unidentified	s__unidentified	0	0	0	0	0	0	0	0	0	0	0	0	0	0	151	0	0	0	0	0	0	0	0	0	0	0	0	0	0	0	0	0	0	0	0	0	0	0	0	0	0	0
0ebd5fdd4d31b76a979d42465b3da681	k__Fungi	p__unidentified	c__unidentified	o__unidentified	f__unidentified	g__unidentified	s__unidentified	0	0	0	0	0	0	0	0	0	0	0	0	0	0	0	0	0	0	0	0	0	0	0	0	0	0	0	0	0	0	0	0	0	0	0	0	0	0	0	0	0	0
0ec28acd5899254a0dcd3c13b8766aaa	k__Fungi	p__unidentified	c__unidentified	o__unidentified	f__unidentified	g__unidentified	s__unidentified	0	0	0	0	0	0	0	0	0	0	0	0	0	0	0	0	0	0	0	0	0	0	0	0	0	0	0	0	0	0	0	0	0	0	0	0	0	0	0	0	0	0
0ec84d55a71ea6a36d2c313920810efb	k__Fungi	p__unidentified	c__unidentified	o__unidentified	f__unidentified	g__unidentified	s__unidentified	0	0	0	0	0	0	0	0	0	0	0	0	0	0	0	0	0	0	0	0	0	0	0	0	0	0	0	0	0	0	0	0	0	0	0	0	0	0	0	0	0	0
0ed165856679d1bcf6941e2850388835	k__Fungi	p__unidentified	c__unidentified	o__unidentified	f__unidentified	g__unidentified	s__unidentified	0	0	0	0	0	0	0	0	0	0	0	0	0	0	0	0	0	0	0	0	0	0	0	0	0	0	0	0	0	0	0	0	0	0	0	0	0	0	0	0	0	0
0ed3191ff114528a506e275a428cddb2	k__Fungi	p__unidentified	c__unidentified	o__unidentified	f__unidentified	g__unidentified	s__unidentified	0	0	0	0	0	0	0	0	0	0	0	0	0	0	0	0	0	0	0	0	29	0	0	0	0	0	0	0	0	0	0	0	0	0	0	0	0	0	0	0	0	0
0ed398328b4f24350f345321441f91b3	k__Fungi	p__unidentified	c__unidentified	o__unidentified	f__unidentified	g__unidentified	s__unidentified	0	0	0	0	0	0	0	0	0	0	0	0	0	0	98	0	0	0	0	0	0	0	0	0	0	0	0	0	0	0	0	0	0	0	0	0	0	0	0	0	0	0
0ed39c014cad33aa9c77c741d7b144dc	k__Fungi	p__Ascomycota	c__Saccharomycetes	o__Saccharomycetales	f__Phaffomycetaceae	g__Wickerhamomyces	s__Wickerhamomyces_anomalus	0	0	0	0	0	0	0	0	0	0	0	0	0	0	0	0	0	0	0	0	0	0	0	0	3	0	0	0	0	0	0	0	0	0	0	0	0	0	0	0	0	0
0ed3fb91a71cd2319763c4d1a35bbe8b	k__Fungi	p__Chytridiomycota	c__unidentified	o__unidentified	f__unidentified	g__unidentified	s__unidentified	0	0	0	0	0	0	0	0	0	0	0	0	0	0	0	0	0	0	0	0	0	0	0	0	0	0	0	0	0	0	0	0	0	0	0	0	0	0	0	0	0	0
0ed59d7cd9cfad431363e96cfe48a8db	k__Fungi	p__unidentified	c__unidentified	o__unidentified	f__unidentified	g__unidentified	s__unidentified	0	0	0	0	0	0	0	0	0	0	0	0	0	0	0	0	0	0	0	0	0	0	0	0	0	0	0	0	0	0	0	0	0	0	0	0	0	0	0	0	0	0
0ee19ad31fd6d7630562ed45d31eb5f4	k__Fungi	p__unidentified	c__unidentified	o__unidentified	f__unidentified	g__unidentified	s__unidentified	0	0	0	0	0	0	0	0	0	0	0	0	0	0	0	0	0	0	0	0	0	0	0	0	0	0	0	0	0	0	0	0	0	0	0	0	0	0	0	0	0	0
0ee70534fcc0d4c319c7f50a25a7ecef	k__Fungi	p__Chytridiomycota	c__unidentified	o__unidentified	f__unidentified	g__unidentified	s__unidentified	0	0	0	0	0	0	0	0	0	0	0	0	0	0	0	0	0	0	0	0	0	0	0	0	0	0	0	0	0	0	0	0	0	0	0	0	0	0	0	0	0	0
0eebc7fc64f46c0da44e39a30da5b78e	k__Fungi	p__Rozellomycota	c__unidentified	o__unidentified	f__unidentified	g__unidentified	s__unidentified	0	0	0	0	0	0	0	0	0	0	0	0	0	0	0	0	0	0	0	0	0	0	0	0	0	0	0	0	0	0	0	0	0	0	0	0	0	0	0	0	0	0
0eed146a8b6e7d1f33ea05f96eb03226	k__Fungi	p__unidentified	c__unidentified	o__unidentified	f__unidentified	g__unidentified	s__unidentified	0	0	0	0	0	0	0	0	0	0	0	0	0	0	0	0	0	0	0	0	0	0	0	0	0	0	0	0	0	0	0	0	0	0	0	0	0	0	0	0	0	0
0eef8ef589e75e31eef035c21e98cb87	k__Fungi	p__unidentified	c__unidentified	o__unidentified	f__unidentified	g__unidentified	s__unidentified	0	0	0	0	0	0	0	0	0	0	0	0	0	0	0	0	0	0	0	0	0	0	0	0	0	0	0	0	0	0	0	0	0	0	0	0	0	0	0	0	0	0
0eef94b1cc14b5f31ad4db8549e21640	k__Fungi	p__Chytridiomycota	c__unidentified	o__unidentified	f__unidentified	g__unidentified	s__unidentified	0	0	0	0	0	0	0	0	0	0	0	0	0	0	0	0	0	0	0	0	0	0	0	0	0	0	0	0	0	0	0	0	0	0	0	0	0	0	0	0	0	0
0ef9de279668127c286fd74d5fea5189	k__Fungi	p__unidentified	c__unidentified	o__unidentified	f__unidentified	g__unidentified	s__unidentified	0	0	0	0	0	0	0	0	0	0	0	0	0	0	0	0	0	0	0	0	0	0	0	0	0	0	0	0	0	0	0	0	0	0	0	0	0	0	0	0	0	0
0f017634cee22bf1e48e1039f331e5c4	k__Fungi	p__Chytridiomycota	c__unidentified	o__unidentified	f__unidentified	g__unidentified	s__unidentified	0	0	0	0	0	0	0	0	0	0	0	0	0	0	0	0	0	0	0	0	0	0	0	0	0	0	0	0	0	0	0	0	0	0	0	0	0	0	0	0	0	0
0f0214a57fe78ea060ca83f1f1f5a379	k__Fungi	p__unidentified	c__unidentified	o__unidentified	f__unidentified	g__unidentified	s__unidentified	0	0	0	0	0	0	0	0	0	0	0	0	0	0	0	0	0	0	0	0	0	0	0	0	0	0	0	0	0	0	0	0	0	0	0	0	0	0	0	0	0	0
0f0eb29258b25d715c2be8fa2e97a28f	k__Fungi	p__Ascomycota	c__Eurotiomycetes	o__Chaetothyriales	f__Herpotrichiellaceae	g__unidentified	s__unidentified	0	0	0	0	0	0	0	0	0	0	0	0	0	0	0	0	0	0	0	0	0	0	0	0	0	0	0	0	0	0	0	0	0	0	0	0	0	0	0	0	0	0
0f0fb91484e0f9b11b87f36c7ef4598c	k__Fungi	p__unidentified	c__unidentified	o__unidentified	f__unidentified	g__unidentified	s__unidentified	0	0	0	0	0	0	0	0	0	0	0	0	0	0	0	0	0	0	0	0	0	0	0	0	0	0	0	0	0	0	0	0	0	0	0	0	0	0	0	0	0	0
0f106f2f7164ead94394d8db5ab17449	k__Fungi	p__unidentified	c__unidentified	o__unidentified	f__unidentified	g__unidentified	s__unidentified	0	0	0	0	0	0	0	0	0	0	0	0	0	0	0	0	0	0	0	0	0	0	0	0	0	0	0	0	0	0	0	0	0	0	0	0	0	0	0	0	0	0
0f1125e1393c3ebbfb3ad01a412563a7	k__Fungi	p__Ascomycota	c__Leotiomycetes	o__Thelebolales	f__Thelebolaceae	g__Antarctomyces	s__unidentified	0	0	0	0	0	0	0	0	0	0	0	0	0	0	0	0	0	0	0	0	0	0	0	0	0	0	0	0	0	0	0	0	0	0	0	0	0	0	0	0	0	0
0f1149c209e875e939325e606f4d1a3a	k__Fungi	p__unidentified	c__unidentified	o__unidentified	f__unidentified	g__unidentified	s__unidentified	0	0	0	0	0	0	0	0	0	0	0	0	0	0	0	0	0	0	0	0	0	4	0	0	0	0	0	0	0	0	0	0	0	0	0	0	0	0	0	0	0	0
0f13a5b375310da5599a2081ca191fae	k__Fungi	p__Ascomycota	c__unidentified	o__unidentified	f__unidentified	g__unidentified	s__unidentified	0	0	0	0	0	0	0	0	0	0	0	0	0	0	0	0	0	0	0	0	0	0	0	0	0	0	0	0	0	0	0	0	0	0	0	0	0	0	3	0	0	0
0f1784ac53780afbf4b2cc0883497fd8	k__Fungi	p__Chytridiomycota	c__unidentified	o__unidentified	f__unidentified	g__unidentified	s__unidentified	0	0	0	0	0	0	0	0	0	0	0	0	0	0	0	0	0	0	0	0	0	0	0	0	0	0	0	0	0	0	0	0	0	0	0	0	0	0	0	0	0	0
0f188f2ca49942715b72bf611eb5e075	k__Fungi	p__unidentified	c__unidentified	o__unidentified	f__unidentified	g__unidentified	s__unidentified	0	0	0	0	0	0	0	0	0	0	0	0	0	0	0	0	0	0	0	0	0	0	0	0	13	0	0	0	0	0	0	0	0	0	0	0	0	0	0	0	0	0
0f19e696e46a93ae317b008b20fd90f7	k__Fungi	p__Ascomycota	c__Eurotiomycetes	o__Eurotiales	f__Aspergillaceae	g__Aspergillus	s__Aspergillus_restrictus	0	0	0	0	0	0	0	0	0	0	0	0	0	0	0	0	0	0	0	0	0	0	0	0	0	0	0	0	0	0	0	0	0	0	0	0	0	0	0	0	0	0
0f1a4d3083416ffa9d1248cc67f8531a	k__Fungi	p__Ascomycota	c__Sordariomycetes	o__Hypocreales	f__Nectriaceae	g__Xenoacremonium	s__Xenoacremonium_falcatum	0	0	0	0	0	0	0	0	0	0	0	0	0	0	0	0	0	0	0	0	0	0	0	0	0	0	0	0	0	0	0	0	0	0	0	0	0	0	0	0	0	0
0f265722cdc0185bf3dcbd1a691d0b05	k__Fungi	p__unidentified	c__unidentified	o__unidentified	f__unidentified	g__unidentified	s__unidentified	0	0	0	0	0	0	0	0	0	0	0	0	0	0	0	0	0	0	0	0	0	0	0	0	0	0	0	0	0	0	0	0	0	29	0	0	0	0	0	0	0	0
0f290f3b071f3235105d7c3e624e4d03	k__Fungi	p__unidentified	c__unidentified	o__unidentified	f__unidentified	g__unidentified	s__unidentified	0	0	0	0	0	0	0	0	0	0	0	0	0	0	0	0	16	0	0	0	0	0	0	0	0	0	0	0	0	0	0	0	0	0	0	0	0	0	0	0	0	0
0f2a86f38367aab88439175ff5c355f2	k__Fungi	p__unidentified	c__unidentified	o__unidentified	f__unidentified	g__unidentified	s__unidentified	0	0	0	0	0	0	0	0	0	0	0	0	0	0	0	0	0	0	0	0	0	0	0	0	0	0	0	0	0	0	0	0	0	0	0	0	0	0	0	0	0	0
0f2b830a76c2de1432eb7093029d20d4	k__Fungi	p__Basidiomycota	c__Microbotryomycetes	o__Sporidiobolales	f__Sporidiobolaceae	g__Rhodotorula	s__unidentified	0	0	0	0	0	0	0	0	0	0	0	0	0	0	0	0	0	0	0	0	0	0	0	0	0	0	0	0	0	0	0	0	0	0	0	0	0	0	0	0	0	0
0f2da846514e70a51e50bbe49e87839a	k__Fungi	p__Chytridiomycota	c__unidentified	o__unidentified	f__unidentified	g__unidentified	s__unidentified	0	0	0	0	0	0	0	0	0	0	0	0	0	0	0	0	0	0	0	0	0	0	0	0	0	0	0	0	0	0	0	0	0	0	0	0	0	0	0	0	0	0
0f2e93d9b8c2e330b00d2e0d588352e1	k__Fungi	p__unidentified	c__unidentified	o__unidentified	f__unidentified	g__unidentified	s__unidentified	0	0	0	0	0	0	0	0	0	0	0	0	0	0	0	0	0	0	0	0	0	0	0	0	0	0	0	0	0	0	0	0	0	0	0	0	0	0	0	0	0	0
0f319f1cfe021eaa9beb36fe83996aa5	k__Fungi	p__unidentified	c__unidentified	o__unidentified	f__unidentified	g__unidentified	s__unidentified	0	0	0	0	0	0	0	0	7	0	0	0	0	0	0	0	0	0	0	0	0	0	0	0	0	0	0	0	0	0	0	0	0	0	0	0	3	0	0	0	18	0
0f352810ea9854057370ab6787e528c9	k__Fungi	p__unidentified	c__unidentified	o__unidentified	f__unidentified	g__unidentified	s__unidentified	0	0	0	0	0	0	0	0	0	0	0	0	0	0	0	0	0	0	0	0	0	0	0	0	0	0	0	0	0	0	0	0	0	0	0	0	0	0	0	0	0	0
0f36056a705f94f01d01029bdf197af9	k__Fungi	p__unidentified	c__unidentified	o__unidentified	f__unidentified	g__unidentified	s__unidentified	0	0	0	0	0	0	0	0	0	0	0	0	0	0	0	0	0	0	0	0	0	0	0	0	0	0	0	0	0	0	0	0	0	0	0	0	0	0	14	0	0	0
0f3fbbfadd2eefdaedd52052ca3c4efb	k__Fungi	p__unidentified	c__unidentified	o__unidentified	f__unidentified	g__unidentified	s__unidentified	0	0	0	0	0	0	0	0	0	0	0	0	0	0	0	0	0	0	0	0	0	0	0	0	0	0	0	0	0	0	0	9	0	0	0	66	0	0	0	0	0	0
0f425c7fc4381422e4fb2e41f50532f9	k__Fungi	p__unidentified	c__unidentified	o__unidentified	f__unidentified	g__unidentified	s__unidentified	0	0	0	0	0	0	0	0	5	0	0	0	0	0	0	0	0	0	0	0	0	0	0	0	0	0	0	0	0	0	0	0	0	0	0	0	0	0	0	0	0	0
0f4b21119307a5d9f6c439c78d7721e9	k__Fungi	p__Chytridiomycota	c__unidentified	o__unidentified	f__unidentified	g__unidentified	s__unidentified	0	0	0	0	0	0	0	0	0	0	0	0	0	0	0	0	0	0	0	0	0	0	0	0	0	0	0	0	0	0	0	0	0	0	0	0	0	0	0	0	0	0
0f4b56574b9402ce4cd07c173a8454eb	k__Fungi	p__unidentified	c__unidentified	o__unidentified	f__unidentified	g__unidentified	s__unidentified	0	0	0	0	0	0	0	0	0	0	0	0	0	0	0	0	0	0	0	0	0	0	0	0	0	0	0	0	0	0	0	0	0	0	0	0	0	0	0	0	0	0
0f4c3d6c5732fa7d182cbf54537d8d99	k__Fungi	p__Ascomycota	c__Sordariomycetes	o__Hypocreales	f__Nectriaceae	g__unidentified	s__unidentified	0	0	0	0	0	0	0	0	0	0	0	0	0	0	0	0	0	0	0	0	0	0	0	0	0	0	0	0	0	0	0	0	0	0	0	0	0	0	0	0	0	0
0f539c2d6b9960594050fac71d85af71	k__Fungi	p__unidentified	c__unidentified	o__unidentified	f__unidentified	g__unidentified	s__unidentified	0	0	0	0	0	0	0	0	0	0	0	0	0	0	0	0	0	0	0	0	0	0	0	0	0	0	0	0	0	0	0	0	0	0	0	0	0	0	0	0	0	0
0f585b0c056b100d486ec88eb8d098c5	k__Fungi	p__unidentified	c__unidentified	o__unidentified	f__unidentified	g__unidentified	s__unidentified	0	0	0	0	0	0	0	0	0	0	0	0	0	0	0	0	0	0	0	0	0	0	0	0	0	0	0	0	0	0	0	0	0	0	0	0	0	0	0	0	0	0
0f62eb2a7a2bbace90055abda18dcbb8	k__Fungi	p__unidentified	c__unidentified	o__unidentified	f__unidentified	g__unidentified	s__unidentified	0	0	0	0	0	0	0	0	0	0	0	0	0	0	0	0	0	0	0	0	0	0	0	0	0	0	0	0	0	0	0	0	0	0	0	0	0	0	0	0	0	0
0f6509b88219a4b659a6c732bd18a9ca	k__Fungi	p__Ascomycota	c__Sordariomycetes	o__Hypocreales	f__Nectriaceae	g__Xenoacremonium	s__Xenoacremonium_falcatum	0	0	0	0	0	0	0	0	0	0	0	0	0	0	0	0	0	0	0	0	0	0	0	0	0	0	0	0	0	0	0	0	0	0	0	0	0	0	0	0	0	0
0f6593568809bab27cca67fd98ac7d3d	k__Fungi	p__unidentified	c__unidentified	o__unidentified	f__unidentified	g__unidentified	s__unidentified	0	0	0	0	0	0	0	0	0	0	0	0	0	0	0	0	0	0	0	7	0	0	0	0	0	0	0	0	0	0	0	0	0	0	0	0	0	0	0	0	0	0
0f6607ad7b7a79fb01ba072af3f0dd55	k__Fungi	p__unidentified	c__unidentified	o__unidentified	f__unidentified	g__unidentified	s__unidentified	0	0	0	136	0	0	0	0	0	0	3270	0	0	0	0	0	0	0	0	0	0	0	0	0	0	0	0	0	379	191	0	0	0	1228	0	0	0	0	0	0	0	823
0f67b9d698386e38c5f016c85f970145	k__Fungi	p__unidentified	c__unidentified	o__unidentified	f__unidentified	g__unidentified	s__unidentified	0	0	0	0	0	0	0	0	0	0	0	0	0	0	0	0	0	0	0	0	0	0	0	0	0	0	0	0	0	0	0	0	0	0	0	0	0	0	0	0	0	0
0f6c3fbc9c36cc0a986fe98ca7a25dfb	k__Fungi	p__unidentified	c__unidentified	o__unidentified	f__unidentified	g__unidentified	s__unidentified	0	0	0	0	0	0	0	0	0	0	0	0	0	0	0	0	0	0	0	0	0	0	0	0	0	0	0	0	0	0	0	0	0	0	0	0	0	0	0	0	0	0
0f76b441d517a0729e789fa83b5f50fa	k__Fungi	p__unidentified	c__unidentified	o__unidentified	f__unidentified	g__unidentified	s__unidentified	0	0	0	0	0	0	0	0	0	0	0	0	0	0	0	0	0	0	0	0	0	0	0	0	0	0	0	0	0	0	0	0	0	12	0	0	0	0	0	0	0	0
0f7e36ed7a1434d9c6dc13c10260f8f3	k__Fungi	p__unidentified	c__unidentified	o__unidentified	f__unidentified	g__unidentified	s__unidentified	0	0	0	0	0	0	0	0	0	0	0	0	0	0	0	0	0	0	0	0	0	0	0	0	0	0	0	0	0	0	0	0	0	0	0	0	0	0	0	0	0	0
0f8481b375b89af2236426993efb5c96	k__Fungi	p__unidentified	c__unidentified	o__unidentified	f__unidentified	g__unidentified	s__unidentified	0	0	0	0	0	0	7	0	0	0	0	0	0	0	0	0	0	0	0	0	0	0	0	0	0	0	0	0	0	0	0	0	0	0	0	0	0	0	0	0	0	0
0f9e0f5a6e1e3b399729de195bd693fc	k__Fungi	p__Ascomycota	c__Eurotiomycetes	o__Eurotiales	f__Aspergillaceae	g__Aspergillus	s__unidentified	0	0	0	0	3	0	0	0	0	0	0	0	0	0	0	0	0	0	0	0	0	0	0	82	0	0	0	0	0	0	0	0	0	0	0	0	0	0	0	0	0	0
0fa478571d4e80bb3e65b99c3aa4c24c	k__Fungi	p__unidentified	c__unidentified	o__unidentified	f__unidentified	g__unidentified	s__unidentified	0	0	0	0	0	0	0	0	0	0	0	0	0	0	0	0	0	0	0	0	0	0	0	0	0	0	0	0	0	0	0	0	0	0	0	0	0	0	0	0	0	0
0fa7309e3d07bb5f7f3c3a097acbb3f0	k__Fungi	p__unidentified	c__unidentified	o__unidentified	f__unidentified	g__unidentified	s__unidentified	0	0	0	0	0	0	0	0	0	0	0	0	0	0	0	0	0	0	0	0	0	0	0	0	0	0	0	0	0	0	0	0	0	0	0	0	0	0	0	0	0	0
0fa8ced3163ef877c6239aa5b009aabf	k__Fungi	p__Ascomycota	c__Sordariomycetes	o__Hypocreales	f__Nectriaceae	g__Xenoacremonium	s__Xenoacremonium_falcatum	0	0	0	26	0	0	0	0	0	0	0	0	0	0	0	0	0	0	0	0	0	0	0	0	0	0	0	0	0	0	0	0	0	0	0	0	0	0	0	0	0	0
0fa92ecbb1e91a1b34edecf16d1dba82	k__Fungi	p__unidentified	c__unidentified	o__unidentified	f__unidentified	g__unidentified	s__unidentified	0	0	0	0	0	0	0	0	0	0	0	0	0	0	0	0	0	0	0	0	0	0	0	0	0	0	0	0	0	0	0	0	0	0	0	0	0	0	0	10	0	0
0fa9d2e67cbb95b323d6a4f16e527425	k__Fungi	p__unidentified	c__unidentified	o__unidentified	f__unidentified	g__unidentified	s__unidentified	0	0	0	0	0	0	0	0	0	0	0	0	0	0	0	0	0	0	0	0	0	0	0	0	0	0	0	0	0	0	0	0	0	0	0	0	0	0	0	0	0	0
0faa3cb33cdf38875ba6a9e74b4f41d3	k__Fungi	p__Ascomycota	c__Saccharomycetes	o__Saccharomycetales	f__Saccharomycetaceae	g__Zygosaccharomyces	s__unidentified	0	0	0	0	0	0	0	0	0	0	0	0	0	0	0	0	0	0	0	0	0	0	0	0	0	0	0	0	0	0	0	0	0	0	0	0	0	0	0	0	0	0
0fabd266f3ceaf07d2e2835674c22f11	k__Fungi	p__Basidiomycota	c__Microbotryomycetes	o__Kriegeriales	f__Kriegeriaceae	g__Phenoliferia	s__Phenoliferia_psychrophila	0	0	0	0	0	0	0	0	0	0	0	0	0	0	0	0	0	0	0	0	0	0	0	0	0	0	0	0	0	0	0	0	0	0	0	0	0	0	0	0	0	0
0fb3e423c30948ba7d4a80b21daf2f9e	k__Fungi	p__unidentified	c__unidentified	o__unidentified	f__unidentified	g__unidentified	s__unidentified	0	0	0	0	0	0	0	0	0	0	0	0	0	0	0	0	0	0	0	0	0	0	0	0	0	0	0	0	0	0	0	0	0	0	0	0	0	0	0	0	0	0
0fb63819cb313ac32e72f55697813bb6	k__Fungi	p__unidentified	c__unidentified	o__unidentified	f__unidentified	g__unidentified	s__unidentified	0	0	0	0	0	0	0	0	0	0	0	0	0	0	0	0	0	0	0	0	0	0	0	0	0	0	0	0	0	0	0	0	0	0	0	0	0	0	0	0	0	0
0fba851acc404d14e1f0ede589559569	k__Fungi	p__Chytridiomycota	c__unidentified	o__unidentified	f__unidentified	g__unidentified	s__unidentified	0	0	0	0	0	0	0	0	0	0	0	0	0	0	0	0	0	0	0	0	0	0	0	0	0	0	0	0	0	0	0	0	0	0	0	0	0	0	0	0	0	0
0fbc260c5a7c07e62389765ed3f1455e	k__Fungi	p__unidentified	c__unidentified	o__unidentified	f__unidentified	g__unidentified	s__unidentified	0	0	0	0	0	0	0	0	0	0	0	0	0	0	0	0	0	0	0	20	0	0	0	0	0	0	0	0	0	0	0	0	0	0	0	0	0	0	0	0	0	0
0fbc3692e633904a212e73667a11d0bb	k__Fungi	p__unidentified	c__unidentified	o__unidentified	f__unidentified	g__unidentified	s__unidentified	0	0	0	0	0	0	0	0	0	0	0	0	0	0	0	0	0	0	0	0	0	0	0	0	0	0	0	0	0	0	0	0	0	0	0	0	0	0	0	0	0	0
0fbd35cd89af21b1f070d578c9367171	k__Fungi	p__unidentified	c__unidentified	o__unidentified	f__unidentified	g__unidentified	s__unidentified	0	0	0	0	0	0	8	0	0	0	0	0	0	0	0	0	0	0	0	0	0	0	0	0	0	0	0	0	0	0	0	0	0	0	0	0	0	0	0	0	0	0
0fbfce99fb1e13e052b24ffc256a8a24	k__Fungi	p__Ascomycota	c__Leotiomycetes	o__Helotiales	f__Hyaloscyphaceae	g__Gyoerffyella	s__unidentified	0	0	0	0	0	0	0	0	0	0	0	0	0	0	0	0	0	0	0	0	0	0	0	0	0	0	0	0	0	0	0	0	0	0	0	0	0	0	0	0	0	0
0fc7c63283920e4c3f29736173d29f48	k__Fungi	p__unidentified	c__unidentified	o__unidentified	f__unidentified	g__unidentified	s__unidentified	0	0	0	0	0	0	0	0	0	0	0	0	0	0	0	0	0	0	0	0	0	0	0	0	0	0	0	0	0	0	0	0	0	0	0	0	0	0	0	0	0	0
0fca84358d18cf1e1873290112052b3c	k__Fungi	p__Chytridiomycota	c__unidentified	o__unidentified	f__unidentified	g__unidentified	s__unidentified	0	0	0	0	0	0	0	0	0	0	0	0	0	0	0	0	0	0	0	0	0	0	0	0	0	0	0	0	0	0	0	0	0	0	0	0	0	0	0	0	0	0
0fcb42f185ad3ea43219e7d170e9fec0	k__Fungi	p__unidentified	c__unidentified	o__unidentified	f__unidentified	g__unidentified	s__unidentified	0	0	0	0	0	0	0	0	0	0	0	0	0	0	0	0	0	0	0	0	0	0	0	0	0	0	0	0	0	0	0	0	0	0	0	0	0	0	0	0	0	0
0fcd18855ebe24565b4e44f03415cd1b	k__Fungi	p__unidentified	c__unidentified	o__unidentified	f__unidentified	g__unidentified	s__unidentified	0	0	0	0	0	0	0	0	0	0	0	0	0	0	0	0	0	0	0	0	0	0	0	0	0	0	0	0	0	0	0	0	0	0	0	0	0	0	0	0	0	0
0fd81389d7c4f4d9c0ca963906ab7f80	k__Fungi	p__unidentified	c__unidentified	o__unidentified	f__unidentified	g__unidentified	s__unidentified	0	0	0	0	0	0	0	0	0	0	0	0	0	0	0	0	0	0	0	0	0	0	0	0	0	0	0	0	0	0	0	0	0	0	0	0	0	0	0	0	0	0
0fdb151f6050fd553a812eab40f95e23	k__Fungi	p__Basidiomycota	c__Agaricomycetes	o__Atheliales	f__Atheliaceae	g__Athelia	s__Athelia_acrospora	0	0	0	0	0	0	0	0	0	0	0	0	0	0	0	0	0	0	0	0	0	0	0	0	0	0	0	0	0	0	0	0	0	0	0	0	0	0	0	0	0	0
0fdc7cbaf9db862d94a9815ea160b9ed	k__Fungi	p__unidentified	c__unidentified	o__unidentified	f__unidentified	g__unidentified	s__unidentified	0	0	0	0	0	0	0	0	0	0	0	0	0	0	0	0	0	0	0	0	0	0	0	0	0	0	0	0	0	0	0	0	0	0	0	0	0	0	0	0	0	0
0fe7eb82726d5b016f077910321f6bf6	k__Fungi	p__unidentified	c__unidentified	o__unidentified	f__unidentified	g__unidentified	s__unidentified	0	0	0	0	0	0	0	0	0	0	0	0	0	0	0	0	0	0	0	0	0	0	0	0	0	0	0	0	0	0	0	0	0	15	0	0	0	0	0	0	0	0
0fea83fba12dd20c19447a5424713384	k__Fungi	p__Ascomycota	c__Dothideomycetes	o__Capnodiales	f__Mycosphaerellaceae	g__Ramularia	s__Ramularia_eucalypti	0	0	0	0	0	0	0	0	0	0	0	0	0	0	0	0	0	0	0	0	0	0	0	0	0	0	0	0	0	0	0	0	0	0	0	0	0	0	6	0	0	0
0feb131f32d5926ca797b468eac15c34	k__Fungi	p__Basidiomycota	c__unidentified	o__unidentified	f__unidentified	g__unidentified	s__unidentified	0	0	0	0	0	0	0	0	0	0	0	0	0	0	0	0	0	0	0	0	0	0	0	0	0	0	0	0	0	0	0	0	0	0	0	0	0	0	0	0	0	0
0fefeb89abaddd12bd7d2975dbf87bd8	k__Fungi	p__Ascomycota	c__Sordariomycetes	o__Hypocreales	f__Nectriaceae	g__Xenoacremonium	s__Xenoacremonium_falcatum	0	0	0	0	0	0	0	0	0	0	0	0	0	0	0	0	0	0	0	0	0	0	0	0	0	0	0	0	0	0	0	0	0	0	0	0	0	0	0	0	0	0
0ff34ae65f1b3508cfe6ac6c7243351a	k__Fungi	p__Ascomycota	c__Sordariomycetes	o__Microascales	f__Microascaceae	g__Kernia	s__Kernia_columnaris	0	0	0	0	0	0	0	0	0	0	0	0	0	0	0	0	0	0	0	0	0	0	0	0	0	0	0	0	0	0	0	0	0	0	0	0	0	0	0	0	0	0
0ff3aae55a7deb45d0c8c83192a55e97	k__Fungi	p__unidentified	c__unidentified	o__unidentified	f__unidentified	g__unidentified	s__unidentified	0	0	0	0	0	0	0	0	0	0	0	0	0	0	0	0	0	0	0	0	0	0	0	0	0	0	0	0	0	0	0	0	0	0	0	0	0	0	0	0	0	0
0ff7e38d6a498c520160e76e7917645a	k__Fungi	p__unidentified	c__unidentified	o__unidentified	f__unidentified	g__unidentified	s__unidentified	0	0	0	0	0	0	0	0	0	0	0	0	0	0	0	0	0	0	0	0	0	0	0	0	0	0	0	0	0	0	0	0	0	0	0	0	0	0	0	0	0	0
0ff9ead183dbaaf4cae9cd26addfffcb	k__Fungi	p__unidentified	c__unidentified	o__unidentified	f__unidentified	g__unidentified	s__unidentified	0	0	0	0	0	0	0	0	0	0	0	0	0	0	0	0	0	0	0	0	0	0	0	0	0	0	0	0	0	0	0	0	0	0	0	0	0	0	0	0	0	0
0ffd2d77fe358e0531694a9e96a4e47b	k__Fungi	p__unidentified	c__unidentified	o__unidentified	f__unidentified	g__unidentified	s__unidentified	0	0	0	0	0	0	0	0	0	0	0	0	0	0	0	0	0	0	0	0	5	0	0	0	0	0	0	0	0	0	0	0	0	0	0	0	0	0	0	0	0	0
1000c130212f571089d282cfc9f8d151	k__Fungi	p__Ascomycota	c__Dothideomycetes	o__Capnodiales	f__Cladosporiaceae	g__Cladosporium	s__unidentified	0	0	0	0	0	0	0	0	0	0	0	0	0	0	0	0	0	0	0	0	0	0	0	0	0	0	0	0	0	0	0	0	0	0	0	0	0	0	0	0	0	0
100429f1a999f6992be763d9e3ebaf35	k__Fungi	p__Ascomycota	c__Sordariomycetes	o__Hypocreales	f__Nectriaceae	g__Xenoacremonium	s__Xenoacremonium_falcatum	0	0	0	0	0	0	0	0	0	0	0	0	0	0	0	0	0	0	0	0	0	0	0	0	0	0	0	0	0	0	0	0	0	0	0	0	0	0	0	0	0	0
100f9ae4af667a62192f99b0936cf449	k__Fungi	p__unidentified	c__unidentified	o__unidentified	f__unidentified	g__unidentified	s__unidentified	0	0	0	0	0	0	0	0	0	0	0	0	0	0	0	0	0	0	0	0	0	0	0	0	0	0	0	0	0	0	0	0	0	0	0	0	0	0	0	0	0	0
10128551d6796860bb9e1b4b6025dbe2	k__Fungi	p__unidentified	c__unidentified	o__unidentified	f__unidentified	g__unidentified	s__unidentified	0	0	0	0	0	0	0	0	0	0	0	0	0	0	0	0	0	0	0	0	0	0	0	0	0	0	0	0	0	0	0	0	0	0	0	0	0	0	0	0	0	0
1016f97237629def55dd220894052f96	k__Fungi	p__unidentified	c__unidentified	o__unidentified	f__unidentified	g__unidentified	s__unidentified	0	0	0	0	0	0	0	0	0	0	0	0	0	0	0	0	0	0	0	0	0	0	0	0	0	0	0	0	0	0	0	0	0	0	0	0	0	0	0	0	0	0
1018235eda9e8f9e39601e68de118bd1	k__Fungi	p__unidentified	c__unidentified	o__unidentified	f__unidentified	g__unidentified	s__unidentified	0	0	0	0	0	0	0	0	0	0	0	0	0	0	0	0	0	0	0	0	0	0	0	0	0	0	0	0	0	0	0	0	0	0	0	0	0	0	0	0	0	0
10192b4bdf46e1ca9c6934c13221b025	k__Fungi	p__unidentified	c__unidentified	o__unidentified	f__unidentified	g__unidentified	s__unidentified	0	0	0	0	0	0	0	0	0	0	0	0	0	0	0	0	0	0	0	0	0	0	0	0	0	0	0	0	0	0	0	0	0	0	0	0	0	0	0	0	0	0
1021762c21fa1d99130b79c3e55f517f	k__Fungi	p__unidentified	c__unidentified	o__unidentified	f__unidentified	g__unidentified	s__unidentified	0	0	0	0	0	0	0	0	0	0	0	0	0	0	0	0	0	0	0	0	0	0	0	0	0	0	0	0	0	0	0	0	0	0	0	0	0	0	0	0	0	0
102243f2c0b31835aa92f15eddd5f5b3	k__Fungi	p__unidentified	c__unidentified	o__unidentified	f__unidentified	g__unidentified	s__unidentified	0	0	0	0	0	0	0	0	0	0	0	0	0	0	0	0	0	0	0	0	0	0	0	0	0	0	0	0	0	0	0	0	0	0	0	0	0	0	0	0	0	0
10267a60bfb260d413147a5599c38698	k__Fungi	p__unidentified	c__unidentified	o__unidentified	f__unidentified	g__unidentified	s__unidentified	0	0	0	0	0	0	0	0	0	0	0	0	0	0	0	0	0	0	0	0	0	0	0	0	0	0	0	0	0	0	0	0	0	0	0	0	0	0	0	0	0	0
1026b539670debeaf8bfb16afa8deb26	k__Fungi	p__Ascomycota	c__Sordariomycetes	o__Hypocreales	f__Hypocreales_fam_Incertae_sedis	g__Sarocladium	s__Sarocladium_summerbellii	50	0	0	0	0	0	0	0	0	0	0	0	0	0	0	0	0	0	0	0	0	0	0	0	0	0	0	0	0	0	0	0	0	0	0	0	0	0	0	0	0	0
10273ff7d833134d6162daf13232deda	k__Fungi	p__unidentified	c__unidentified	o__unidentified	f__unidentified	g__unidentified	s__unidentified	0	0	0	0	0	0	0	0	0	0	0	0	0	0	0	0	0	0	0	0	0	0	0	0	0	0	0	0	0	0	0	0	0	0	0	0	0	0	0	0	0	0
1031e24b2bfda9eff6d9c93f33802c33	k__Fungi	p__unidentified	c__unidentified	o__unidentified	f__unidentified	g__unidentified	s__unidentified	0	0	0	0	0	0	0	0	0	0	0	0	0	0	0	0	0	0	0	0	0	0	0	0	0	0	0	0	0	0	0	0	0	0	0	0	0	0	0	0	0	0
1032a9b6935cceaef25094e060569427	k__Fungi	p__Chytridiomycota	c__unidentified	o__unidentified	f__unidentified	g__unidentified	s__unidentified	0	0	0	0	0	0	0	0	0	0	0	0	0	0	0	0	0	0	0	0	0	0	0	0	0	0	0	0	0	0	0	0	0	0	0	0	0	0	0	0	0	0
1032c9cdef30f80c1b8898224e8e42ff	k__Fungi	p__Basidiomycota	c__Microbotryomycetes	o__Leucosporidiales	f__Leucosporidiaceae	g__Mastigobasidium	s__unidentified	0	0	0	0	0	0	0	0	0	0	0	0	0	0	0	0	0	0	0	0	0	0	0	0	0	0	0	0	0	0	0	0	0	0	0	0	0	0	0	0	0	0
10355b86608a4121a76da1979d9e7ce7	k__Fungi	p__unidentified	c__unidentified	o__unidentified	f__unidentified	g__unidentified	s__unidentified	0	0	0	0	0	0	0	0	0	0	0	0	0	0	0	0	0	0	0	0	0	0	0	0	0	0	0	0	0	0	0	0	0	0	0	0	0	0	0	0	0	0
1036bf02027391d3f709986baf0055e6	k__Fungi	p__Basidiomycota	c__unidentified	o__unidentified	f__unidentified	g__unidentified	s__unidentified	0	0	0	0	0	0	0	0	0	0	0	0	0	0	0	0	0	0	0	0	0	0	0	0	0	0	0	0	0	0	0	0	0	0	0	0	0	0	0	0	0	0
10375914c53d2ffa335139781162be30	k__Fungi	p__unidentified	c__unidentified	o__unidentified	f__unidentified	g__unidentified	s__unidentified	0	0	0	47	0	0	0	0	0	0	0	0	0	0	0	0	0	0	197	0	0	0	0	0	26	0	0	0	0	0	0	0	0	0	0	0	0	0	0	0	0	0
10381ee7697c71a4878eceb76df3dd1b	k__Fungi	p__Chytridiomycota	c__Rhizophydiomycetes	o__Rhizophydiales	f__unidentified	g__unidentified	s__unidentified	0	0	0	0	0	0	0	0	0	0	0	0	0	0	0	0	0	0	0	0	0	0	0	0	0	0	0	0	0	0	0	0	0	0	0	0	0	0	0	0	0	0
103a85a43fa78e848a958dc8176a6e9c	k__Fungi	p__unidentified	c__unidentified	o__unidentified	f__unidentified	g__unidentified	s__unidentified	0	0	0	0	0	0	0	0	0	0	0	0	0	0	0	0	0	0	0	0	0	0	0	0	0	0	0	0	0	0	0	0	0	0	0	0	0	0	0	0	0	0
103b6ac48b46d1affef02be956c13415	k__Fungi	p__unidentified	c__unidentified	o__unidentified	f__unidentified	g__unidentified	s__unidentified	0	0	0	0	0	0	0	0	0	0	0	0	0	0	0	0	0	0	0	0	0	0	0	0	0	0	0	0	0	0	0	0	0	0	0	0	0	0	0	0	0	0
1045d2a7a72579e5b1f9ac7da5a388ec	k__Fungi	p__Chytridiomycota	c__unidentified	o__unidentified	f__unidentified	g__unidentified	s__unidentified	0	0	0	0	0	0	0	0	0	0	0	0	0	0	0	0	0	0	0	0	0	0	0	0	0	0	0	0	0	0	0	0	0	0	0	0	0	0	0	0	0	0
1048764a394ea89d91ade10a7a98e10b	k__Fungi	p__Ascomycota	c__Sordariomycetes	o__Hypocreales	f__Nectriaceae	g__Xenoacremonium	s__Xenoacremonium_falcatum	0	0	0	0	0	0	0	0	0	0	0	0	0	0	0	0	0	0	0	0	0	0	0	0	0	0	0	0	0	0	0	0	0	0	0	0	0	0	0	0	0	0
1048aa51ddeffe2bfb0766ca17cee7dd	k__Fungi	p__unidentified	c__unidentified	o__unidentified	f__unidentified	g__unidentified	s__unidentified	0	0	0	0	0	0	0	0	0	0	0	0	0	0	0	0	0	0	0	0	0	0	0	0	0	0	0	0	0	0	0	0	0	0	0	0	0	0	0	0	0	0
104c941fba28da3e229f6d9b4a447f4c	k__Fungi	p__Chytridiomycota	c__unidentified	o__unidentified	f__unidentified	g__unidentified	s__unidentified	0	0	0	0	0	0	0	0	0	0	0	0	0	0	0	0	0	0	0	16	0	0	0	0	0	0	0	0	0	0	0	0	0	0	0	0	0	0	0	0	0	0
10513e760e830aecb5c4527b2b615a3c	k__Fungi	p__unidentified	c__unidentified	o__unidentified	f__unidentified	g__unidentified	s__unidentified	0	0	0	0	0	0	0	0	0	0	0	0	0	0	0	0	0	0	0	0	0	0	0	0	0	0	0	0	0	0	0	0	0	0	0	0	0	0	0	0	0	0
1053fa47f26a824d21c37e089fb11329	k__Fungi	p__unidentified	c__unidentified	o__unidentified	f__unidentified	g__unidentified	s__unidentified	0	0	0	0	0	0	0	0	0	0	0	0	0	0	0	0	0	0	0	0	0	0	0	0	0	0	0	0	0	0	0	0	0	0	0	0	0	0	0	0	0	0
105571355b5bad28f95f18d3aaf3915a	k__Fungi	p__unidentified	c__unidentified	o__unidentified	f__unidentified	g__unidentified	s__unidentified	0	0	0	0	0	0	0	0	0	0	0	0	0	0	0	0	0	0	0	0	0	0	0	0	0	0	0	0	0	0	0	0	0	0	0	0	0	0	0	0	0	0
1056dc69c1bb9d4a8e959e886f81c60a	k__Fungi	p__Ascomycota	c__Sordariomycetes	o__Hypocreales	f__Nectriaceae	g__Xenoacremonium	s__Xenoacremonium_falcatum	0	0	0	0	0	0	0	0	0	0	0	0	0	0	0	0	0	0	0	0	0	0	0	0	0	0	0	0	0	0	0	0	0	0	0	0	0	0	0	0	0	0
105f4b53e0cc2aca3234ab04e19d5475	k__Fungi	p__Ascomycota	c__Sordariomycetes	o__Hypocreales	f__Nectriaceae	g__Xenoacremonium	s__Xenoacremonium_falcatum	0	0	0	0	0	0	0	0	51	0	0	0	0	0	0	0	0	0	0	0	0	0	0	0	0	0	0	0	0	0	0	0	0	0	0	0	0	0	0	0	0	0
106358a3152c9bc48f9f2e3a0e6c303c	k__Fungi	p__unidentified	c__unidentified	o__unidentified	f__unidentified	g__unidentified	s__unidentified	0	0	0	0	0	0	0	0	0	0	0	0	0	0	0	0	0	0	0	0	0	0	0	0	0	0	0	0	0	0	0	0	0	0	0	0	0	0	0	0	0	0
1064148694aebb30ab4ca1bf895a2da5	k__Fungi	p__Basidiomycota	c__Microbotryomycetes	o__Sporidiobolales	f__Sporidiobolaceae	g__Rhodotorula	s__unidentified	0	0	0	0	0	0	0	0	0	0	0	0	0	0	0	0	0	0	0	0	0	0	0	0	0	0	0	0	0	0	0	0	0	0	0	0	0	0	0	0	0	0
1069c9b8bd0d76ef3033b49139880a1e	k__Fungi	p__unidentified	c__unidentified	o__unidentified	f__unidentified	g__unidentified	s__unidentified	0	0	0	0	0	0	0	0	0	0	0	0	0	0	0	0	0	0	0	0	0	0	0	0	0	0	0	0	0	0	0	0	0	0	0	0	0	0	0	0	0	0
106aeee30ab27d9f09a9c64b3e250553	k__Fungi	p__Chytridiomycota	c__unidentified	o__unidentified	f__unidentified	g__unidentified	s__unidentified	0	0	0	0	0	0	0	0	0	0	0	0	0	0	0	0	0	0	0	0	0	0	0	0	0	0	0	0	0	0	0	0	0	0	0	0	0	0	0	0	0	0
10764898326622b3dc4fd2c8ee8ce1e8	k__Fungi	p__unidentified	c__unidentified	o__unidentified	f__unidentified	g__unidentified	s__unidentified	0	0	0	0	0	0	0	0	0	0	0	0	0	0	0	0	0	0	0	0	0	0	0	0	0	0	0	0	0	0	0	0	0	0	0	0	0	0	0	0	0	0
1080e55b7c01308ad8345d21233e4f89	k__Fungi	p__unidentified	c__unidentified	o__unidentified	f__unidentified	g__unidentified	s__unidentified	0	0	0	0	0	0	0	0	0	0	0	0	0	0	0	0	0	0	0	0	0	0	0	0	0	0	0	0	0	0	0	0	0	0	0	0	0	0	0	0	0	0
1081b3369a354d93d9825abf8cb116cd	k__Fungi	p__unidentified	c__unidentified	o__unidentified	f__unidentified	g__unidentified	s__unidentified	0	0	0	0	0	0	0	0	0	0	0	0	0	0	137	0	0	0	0	0	0	0	0	0	0	0	0	0	0	0	0	0	0	0	0	0	0	0	0	0	0	0
1085d71302fe7f620a7ddd1c4ae9fd16	k__Fungi	p__unidentified	c__unidentified	o__unidentified	f__unidentified	g__unidentified	s__unidentified	0	0	0	0	0	0	0	0	0	0	0	0	0	0	0	0	0	0	0	0	0	0	0	0	0	0	0	0	0	0	0	0	0	0	0	0	0	0	0	0	0	0
1086eb10a2dc44213bdcc6c5123c5f49	k__Fungi	p__unidentified	c__unidentified	o__unidentified	f__unidentified	g__unidentified	s__unidentified	0	0	0	0	0	0	0	0	0	0	0	0	0	0	0	0	0	0	0	0	0	0	0	0	0	0	0	0	0	0	0	0	0	0	0	0	0	0	0	0	0	0
10870bfa969c41c868364461bb507da3	k__Fungi	p__unidentified	c__unidentified	o__unidentified	f__unidentified	g__unidentified	s__unidentified	0	0	0	0	0	0	0	0	0	0	0	0	0	0	0	0	0	0	0	0	0	0	0	0	0	0	0	0	9	14	0	0	0	107	0	0	0	0	0	0	0	0
108ae388654e4ef728aab7fe4d9a5edb	k__Fungi	p__Rozellomycota	c__unidentified	o__unidentified	f__unidentified	g__unidentified	s__unidentified	0	0	0	53	0	0	0	0	0	0	0	0	0	0	0	0	0	0	0	0	0	0	0	0	0	0	0	0	0	0	0	0	0	0	0	0	0	0	0	0	0	0
10906baca736896860c9a5a6de910282	k__Fungi	p__unidentified	c__unidentified	o__unidentified	f__unidentified	g__unidentified	s__unidentified	0	0	0	0	0	0	0	0	0	0	0	0	0	0	0	0	0	0	0	0	0	0	0	0	0	0	0	0	0	0	0	0	0	0	0	0	0	0	0	0	0	0
1092dc9c5f7ac57d3e9d97a1132a4b7f	k__Fungi	p__unidentified	c__unidentified	o__unidentified	f__unidentified	g__unidentified	s__unidentified	0	0	94	0	0	0	0	0	0	0	0	0	0	0	0	0	0	0	0	0	0	0	0	0	0	0	0	0	0	0	0	0	0	0	0	0	0	0	0	0	0	0
109ec93d4b54e59b020829a7905cf1fa	k__Fungi	p__unidentified	c__unidentified	o__unidentified	f__unidentified	g__unidentified	s__unidentified	0	0	0	0	0	0	0	0	0	0	0	0	0	0	0	0	0	0	0	0	0	0	0	0	0	0	0	0	0	0	0	0	0	0	0	0	0	0	0	0	0	0
10a8afb29e148f6ec9645a7367ebae4e	k__Fungi	p__Chytridiomycota	c__unidentified	o__unidentified	f__unidentified	g__unidentified	s__unidentified	0	0	0	0	0	0	0	0	0	0	0	0	0	0	0	0	0	0	0	0	0	0	0	0	0	0	0	0	0	0	0	0	0	0	0	0	0	0	0	0	0	0
10ab86f43c399802974ec811c0e9a1c6	k__Fungi	p__unidentified	c__unidentified	o__unidentified	f__unidentified	g__unidentified	s__unidentified	0	0	0	0	0	0	0	0	0	0	0	0	0	0	0	0	0	0	0	0	0	0	0	0	0	0	0	0	0	0	0	0	0	0	0	0	0	0	0	0	0	0
10ac8a00ee4efdf9fc663aa93ea3768c	k__Fungi	p__Ascomycota	c__Sordariomycetes	o__Hypocreales	f__Nectriaceae	g__Xenoacremonium	s__Xenoacremonium_falcatum	0	0	0	0	0	0	0	0	0	0	0	0	0	0	0	0	0	0	0	0	0	0	0	0	0	0	0	0	0	0	0	0	0	0	0	0	0	4	0	0	0	0
10ad42df3ec9cc95c93cae8940ff2dc1	k__Fungi	p__Ascomycota	c__Eurotiomycetes	o__Verrucariales	f__Verrucariaceae	g__unidentified	s__unidentified	0	0	0	0	0	0	0	0	0	0	0	0	0	0	0	0	0	0	0	0	0	0	0	0	0	0	0	0	0	0	0	0	0	0	0	0	0	0	0	0	0	0
10ae5b473dbf8cb8329a4f364a2c783f	k__Fungi	p__unidentified	c__unidentified	o__unidentified	f__unidentified	g__unidentified	s__unidentified	0	0	0	0	0	0	0	0	0	0	0	0	0	0	0	0	0	0	0	0	0	0	0	0	0	0	0	0	0	0	0	0	0	0	0	0	0	0	0	0	0	0
10b3214743cf2dc8ee4b163b0d5a730f	k__Fungi	p__Chytridiomycota	c__unidentified	o__unidentified	f__unidentified	g__unidentified	s__unidentified	0	0	0	0	0	0	0	0	0	0	0	0	0	0	0	0	0	0	0	0	0	0	0	0	0	0	0	0	0	0	0	0	0	0	0	0	0	0	0	0	0	0
10ba14563ec45bc2d23caf22e623f5a2	k__Fungi	p__Chytridiomycota	c__unidentified	o__unidentified	f__unidentified	g__unidentified	s__unidentified	0	0	0	0	0	0	0	0	0	0	0	0	0	0	0	0	0	0	0	0	0	0	0	0	0	0	0	0	0	0	0	0	0	0	0	0	0	0	0	0	0	0
10be5b6b4df65f91e712afe861bdbda1	k__Fungi	p__unidentified	c__unidentified	o__unidentified	f__unidentified	g__unidentified	s__unidentified	0	0	0	0	0	0	0	0	0	0	0	0	0	0	0	0	0	0	0	0	0	0	0	0	0	0	0	0	0	0	0	0	0	0	0	0	0	0	0	0	0	0
10c04de6778ccb49740e8de6aca76f51	k__Fungi	p__unidentified	c__unidentified	o__unidentified	f__unidentified	g__unidentified	s__unidentified	0	0	0	0	0	0	0	0	0	0	0	0	0	0	0	0	0	0	0	0	0	0	0	0	0	0	0	0	0	0	0	0	0	0	0	0	0	0	0	0	0	0
10ca9d50cf85a6c16568649b27a4c6be	k__Fungi	p__unidentified	c__unidentified	o__unidentified	f__unidentified	g__unidentified	s__unidentified	0	0	0	0	0	0	0	0	0	0	0	0	6	0	0	0	0	0	0	0	0	0	0	0	0	0	0	0	0	0	0	0	0	0	0	0	0	0	0	0	0	0
10cd6ccd05eb418fd72d16d8cbd9bf8e	k__Fungi	p__Basidiomycota	c__unidentified	o__unidentified	f__unidentified	g__unidentified	s__unidentified	0	0	0	13	0	0	0	0	0	0	0	0	0	0	0	0	0	0	0	0	0	0	0	0	0	0	0	0	0	0	0	0	0	0	0	0	0	0	0	0	0	0
10d473e23e6867c41eae7eca28a00a0c	k__Fungi	p__unidentified	c__unidentified	o__unidentified	f__unidentified	g__unidentified	s__unidentified	0	0	0	0	0	0	0	0	0	0	0	0	0	0	0	0	0	0	0	0	0	0	0	0	0	0	0	0	0	0	0	0	0	0	0	0	0	0	0	0	0	0
10d5669616c72d53c4857f13c79aa867	k__Fungi	p__unidentified	c__unidentified	o__unidentified	f__unidentified	g__unidentified	s__unidentified	0	0	0	0	0	0	0	0	0	0	0	0	0	0	0	0	0	0	0	0	0	0	0	0	0	0	0	28	0	0	0	0	0	0	0	0	0	0	0	0	0	0
10da0703f12878d8d54fcc1bc491a04a	k__Fungi	p__unidentified	c__unidentified	o__unidentified	f__unidentified	g__unidentified	s__unidentified	0	0	0	0	0	0	0	0	0	0	0	0	0	0	0	0	0	0	0	0	0	0	0	0	0	0	0	0	0	0	0	0	0	0	0	0	0	0	0	0	0	0
10da0c63d535c5415f55990eef939503	k__Fungi	p__unidentified	c__unidentified	o__unidentified	f__unidentified	g__unidentified	s__unidentified	0	0	0	0	0	0	0	0	0	0	0	0	0	0	0	0	0	0	0	0	0	0	0	0	0	0	0	0	0	0	0	0	0	0	0	0	0	0	0	0	0	0
10dc129b5fa7f06f04f17ccf4d10b341	k__Fungi	p__unidentified	c__unidentified	o__unidentified	f__unidentified	g__unidentified	s__unidentified	0	0	0	0	0	0	0	0	0	0	0	0	0	0	0	0	0	0	0	0	0	0	0	0	0	0	0	0	0	0	0	0	0	0	0	0	0	0	0	0	0	0
10de074082d1d625a5cd5d27ff40d261	k__Fungi	p__unidentified	c__unidentified	o__unidentified	f__unidentified	g__unidentified	s__unidentified	0	0	0	0	0	0	0	0	0	0	0	0	0	0	0	0	0	0	0	0	0	0	0	0	0	0	0	0	0	15	0	0	0	0	0	0	0	0	0	0	0	0
10e08259cf6708517e530545f3a940a0	k__Fungi	p__unidentified	c__unidentified	o__unidentified	f__unidentified	g__unidentified	s__unidentified	0	0	0	0	0	0	0	0	0	0	0	0	0	0	0	0	0	0	0	0	0	0	0	0	0	0	0	0	0	0	0	0	0	0	0	0	0	0	0	0	0	0
10e2dda56b9c2fff0d9348eab877bd89	k__Fungi	p__unidentified	c__unidentified	o__unidentified	f__unidentified	g__unidentified	s__unidentified	0	0	0	0	0	0	0	0	0	0	0	0	0	0	0	0	0	0	0	0	0	0	0	0	0	0	0	0	0	0	0	0	0	0	0	0	0	0	0	0	0	0
10e3b9a2f59a815e7b43cb4a6e604724	k__Fungi	p__unidentified	c__unidentified	o__unidentified	f__unidentified	g__unidentified	s__unidentified	0	0	0	0	0	0	0	0	0	0	0	0	0	0	0	0	0	0	0	0	0	0	0	0	0	0	0	0	0	0	0	0	0	0	0	0	0	0	0	0	0	0
10e63dabfe2e2f13af657be8dfcdfe95	k__Fungi	p__unidentified	c__unidentified	o__unidentified	f__unidentified	g__unidentified	s__unidentified	0	0	0	0	0	0	0	0	0	0	0	0	0	0	0	0	0	0	0	0	0	0	0	0	0	0	0	0	0	0	0	0	0	0	0	0	0	0	0	0	0	0
10e70ff625c80bd8cdd695ae497d9fbe	k__Fungi	p__unidentified	c__unidentified	o__unidentified	f__unidentified	g__unidentified	s__unidentified	0	0	0	0	0	0	0	0	0	0	0	0	0	0	0	0	0	0	0	0	0	0	0	0	0	0	0	0	0	0	0	0	0	0	0	0	0	0	0	0	0	0
10eac71dc1747616f0ccc857ac10e41c	k__Fungi	p__Ascomycota	c__Leotiomycetes	o__Helotiales	f__Hyaloscyphaceae	g__Lachnellula	s__Lachnellula_fuscosanguinea	0	0	0	0	0	0	0	0	0	0	0	0	0	0	0	0	0	0	0	0	0	0	0	0	0	0	0	0	0	0	0	0	0	0	0	0	0	0	0	0	0	0
10ed1738d4805d704032cdbbb185596e	k__Fungi	p__Rozellomycota	c__Rozellomycotina_cls_Incertae_sedis	o__Branch03	f__unidentified	g__unidentified	s__unidentified	0	0	0	0	0	0	0	0	0	0	0	0	0	0	0	0	0	0	0	0	0	0	0	0	0	0	0	0	0	0	0	0	0	0	0	0	0	0	0	0	0	0
10f98968caef6bce69d4575872e49fb3	k__Fungi	p__unidentified	c__unidentified	o__unidentified	f__unidentified	g__unidentified	s__unidentified	0	0	0	0	0	0	0	0	0	0	0	0	0	0	0	0	0	0	0	0	0	0	0	0	0	0	0	0	0	0	0	0	0	0	8	0	0	0	0	11	0	0
10fae5e335f66d69032f88908dca0592	k__Fungi	p__unidentified	c__unidentified	o__unidentified	f__unidentified	g__unidentified	s__unidentified	0	0	0	0	0	0	0	0	0	0	0	0	0	0	0	0	0	0	0	0	0	0	0	0	0	0	0	0	0	0	0	0	0	0	0	0	0	0	0	0	0	0
11027b02360a639096d2ff848a5ecf81	k__Fungi	p__unidentified	c__unidentified	o__unidentified	f__unidentified	g__unidentified	s__unidentified	0	0	0	0	0	0	0	0	0	0	0	0	0	0	0	0	0	0	0	0	0	0	0	0	0	0	0	0	0	0	0	0	0	0	0	0	0	0	0	0	0	0
110f4b05525027eeaa7308271a544154	k__Fungi	p__unidentified	c__unidentified	o__unidentified	f__unidentified	g__unidentified	s__unidentified	0	0	0	0	0	0	0	0	21	0	0	127	0	0	0	0	0	0	0	0	0	0	0	0	0	0	0	0	0	0	0	0	0	0	0	0	0	0	0	0	0	0
111045db534d6968d2e2f63058cc9f7b	k__Fungi	p__unidentified	c__unidentified	o__unidentified	f__unidentified	g__unidentified	s__unidentified	0	0	0	0	0	0	0	0	0	0	0	0	0	0	35	0	0	0	0	0	0	0	0	0	0	0	0	0	0	0	0	0	0	0	0	0	0	0	0	0	0	0
11131e7eb21f75bd57eeb581c4420761	k__Fungi	p__Chytridiomycota	c__Lobulomycetes	o__Lobulomycetales	f__Lobulomycetaceae	g__Lobulomyces	s__unidentified	0	0	0	0	0	0	0	0	0	0	0	0	0	0	0	0	0	0	0	0	0	0	0	0	0	0	0	0	0	0	0	0	0	0	0	0	0	0	0	0	0	0
1118bcfec1c76eaff24419f0653f1eb1	k__Fungi	p__unidentified	c__unidentified	o__unidentified	f__unidentified	g__unidentified	s__unidentified	0	0	0	0	0	0	0	0	0	0	0	0	0	0	0	0	0	0	0	0	0	0	0	0	0	0	0	0	0	0	0	0	0	0	0	0	0	0	0	0	0	0
111a5c7fc8947d8ac4873ad9479bcdac	k__Fungi	p__unidentified	c__unidentified	o__unidentified	f__unidentified	g__unidentified	s__unidentified	0	0	0	0	0	0	0	0	0	0	0	0	0	0	0	0	0	0	0	0	0	0	0	0	0	0	0	0	0	0	0	0	0	0	0	0	0	0	0	0	0	0
111bb2ba8d269b2cbef7c5b6927ed433	k__Fungi	p__Ascomycota	c__unidentified	o__unidentified	f__unidentified	g__unidentified	s__unidentified	0	0	0	0	0	0	0	0	0	0	0	0	0	0	0	0	0	0	0	0	0	0	0	0	0	0	0	0	0	0	0	0	0	0	0	0	0	0	0	0	0	0
111e5419949fe42308a9c1cb38732fb5	k__Fungi	p__unidentified	c__unidentified	o__unidentified	f__unidentified	g__unidentified	s__unidentified	0	0	0	0	0	0	0	0	0	0	0	12	0	0	0	0	0	0	0	0	0	0	0	0	0	0	0	0	0	0	0	0	0	0	0	0	0	0	0	0	0	0
112054e9366053a50b7a4d5a473de803	k__Fungi	p__Ascomycota	c__Eurotiomycetes	o__Chaetothyriales	f__Herpotrichiellaceae	g__Cladophialophora	s__Cladophialophora_minutissima	0	0	0	0	0	0	0	0	0	0	0	0	0	0	61	0	0	0	0	0	0	0	0	0	0	0	0	0	0	0	0	0	0	0	0	0	0	0	0	0	0	0
1120f0e1b80bc2fcfca19344e24be143	k__Fungi	p__unidentified	c__unidentified	o__unidentified	f__unidentified	g__unidentified	s__unidentified	0	0	0	0	0	0	0	0	0	0	0	0	0	0	0	0	0	0	0	0	0	0	0	0	0	0	0	0	0	0	0	0	0	0	0	0	0	0	0	0	0	0
1125194924ff306425b1353a01da6941	k__Fungi	p__unidentified	c__unidentified	o__unidentified	f__unidentified	g__unidentified	s__unidentified	0	0	0	4	0	0	0	0	0	0	0	0	0	0	0	0	0	0	0	0	0	0	0	0	0	0	0	0	0	0	0	0	0	0	0	0	0	0	0	0	0	0
112b7665b72be3fc6a56bead906224a8	k__Fungi	p__unidentified	c__unidentified	o__unidentified	f__unidentified	g__unidentified	s__unidentified	0	0	0	0	0	0	0	0	0	0	0	0	0	0	0	0	0	0	0	0	0	0	0	0	0	0	0	0	0	0	0	0	0	0	0	0	0	0	0	0	0	0
112d55ed425fec258e9aaed236ba523e	k__Fungi	p__Ascomycota	c__Eurotiomycetes	o__Eurotiales	f__Aspergillaceae	g__Aspergillus	s__unidentified	0	0	0	0	0	0	0	0	0	0	0	0	0	0	0	0	0	0	0	0	0	0	0	0	0	0	0	0	0	0	0	0	0	0	0	0	0	0	0	0	0	0
112ffb1b718100934150afa208450fa0	k__Fungi	p__unidentified	c__unidentified	o__unidentified	f__unidentified	g__unidentified	s__unidentified	0	0	0	0	0	0	0	0	0	0	0	0	0	0	0	0	0	0	0	0	0	0	0	0	0	0	0	0	0	0	0	0	0	0	0	0	0	0	0	0	0	0
113315320ec6d606e456d114c9988756	k__Fungi	p__unidentified	c__unidentified	o__unidentified	f__unidentified	g__unidentified	s__unidentified	0	0	0	0	0	0	0	0	0	0	0	0	0	0	0	0	0	0	0	0	0	0	0	0	0	0	0	0	0	0	0	0	0	0	0	0	0	0	0	0	0	0
1133bffb5f3c566940cc22794f2e0ee7	k__Fungi	p__unidentified	c__unidentified	o__unidentified	f__unidentified	g__unidentified	s__unidentified	0	0	9	0	0	0	0	0	0	0	0	0	0	0	0	0	0	0	0	0	0	0	0	0	0	0	0	0	0	0	0	0	0	0	0	0	0	0	0	0	0	0
11361ff7648c2c1e78d631172fd08a12	k__Fungi	p__Ascomycota	c__Sordariomycetes	o__Hypocreales	f__Nectriaceae	g__Xenoacremonium	s__Xenoacremonium_falcatum	0	0	0	0	0	0	0	0	0	0	0	0	0	0	0	0	0	0	0	0	0	0	0	0	0	0	0	0	0	0	0	0	0	0	0	0	0	0	0	0	0	0
1136eb000f51ab60a648499c9b8cf612	k__Fungi	p__unidentified	c__unidentified	o__unidentified	f__unidentified	g__unidentified	s__unidentified	0	0	0	0	0	0	0	0	0	0	0	0	0	0	0	0	0	0	0	0	0	0	0	0	0	0	0	0	0	0	0	0	0	0	0	0	0	0	0	0	0	0
11376ced8a91a9160ca098ecdf1e1da5	k__Fungi	p__unidentified	c__unidentified	o__unidentified	f__unidentified	g__unidentified	s__unidentified	0	0	0	0	0	0	0	0	0	0	0	0	0	0	0	0	0	0	0	0	0	0	0	0	0	0	0	0	0	0	0	0	0	0	0	0	0	0	0	0	0	0
1149e38860fdfccd88ad363fbf9a6b45	k__Fungi	p__Chytridiomycota	c__unidentified	o__unidentified	f__unidentified	g__unidentified	s__unidentified	0	0	0	0	0	0	0	0	0	0	0	0	0	0	0	0	0	0	0	0	0	0	0	0	0	0	0	0	0	0	0	0	0	0	0	0	0	0	0	0	0	0
114f8056477ef2e4ffafbda1ed90697f	k__Fungi	p__unidentified	c__unidentified	o__unidentified	f__unidentified	g__unidentified	s__unidentified	0	11	30	0	0	0	0	0	0	0	0	0	0	7	0	0	0	0	0	0	0	0	0	0	0	0	0	0	0	0	0	0	0	0	0	62	0	0	49	269	0	0
11504e313dd4d2634e7ef424d3e4d8dd	k__Fungi	p__unidentified	c__unidentified	o__unidentified	f__unidentified	g__unidentified	s__unidentified	0	0	0	0	0	0	0	0	0	0	0	0	0	0	0	0	0	0	0	0	0	0	0	0	0	0	0	0	0	0	0	0	0	0	0	0	0	0	0	0	0	0
11549414f7c6df9436fd0f4c1acadb6e	k__Fungi	p__unidentified	c__unidentified	o__unidentified	f__unidentified	g__unidentified	s__unidentified	0	0	0	0	0	0	0	0	0	0	0	0	0	0	0	0	0	0	0	0	0	0	0	0	0	0	0	0	0	0	0	0	0	0	0	0	0	0	0	0	0	0
11554b1ac6af68e222d174a137f610fe	k__Fungi	p__unidentified	c__unidentified	o__unidentified	f__unidentified	g__unidentified	s__unidentified	0	0	0	0	0	0	0	0	0	0	0	0	0	0	0	0	0	0	0	0	0	0	0	0	0	0	0	0	0	0	0	0	0	0	0	0	0	0	0	0	0	0
115833c3b74ec9e8bd02c2adbeb1c8c3	k__Fungi	p__unidentified	c__unidentified	o__unidentified	f__unidentified	g__unidentified	s__unidentified	0	0	0	0	0	0	0	0	0	0	0	0	0	0	0	0	0	0	0	0	0	0	0	0	0	0	0	0	0	0	0	0	0	0	0	0	0	0	0	0	0	0
115f55bde66215fb168f32b7aa383b95	k__Fungi	p__unidentified	c__unidentified	o__unidentified	f__unidentified	g__unidentified	s__unidentified	0	0	0	0	0	0	0	0	0	0	0	0	0	0	0	0	0	0	0	0	0	0	0	0	0	0	0	0	0	0	0	0	0	0	0	0	0	0	0	0	0	0
1162174a47d9644deb173c74b4373643	k__Fungi	p__unidentified	c__unidentified	o__unidentified	f__unidentified	g__unidentified	s__unidentified	0	0	0	0	0	0	0	0	0	0	0	0	0	0	0	0	0	0	0	0	0	0	0	0	0	0	0	0	0	0	0	0	0	0	0	0	0	0	0	0	0	0
1167527df4a298f48085f07e8410ed76	k__Fungi	p__Basidiomycota	c__Agaricomycetes	o__Atheliales	f__Atheliaceae	g__Athelia	s__Athelia_acrospora	0	0	0	0	0	0	0	0	0	0	0	0	0	0	0	0	0	0	0	0	0	0	0	0	0	0	0	0	0	0	0	0	0	0	0	0	0	0	0	0	0	0
116d597e8b612b01d9ca2a4e1912a534	k__Fungi	p__Ascomycota	c__Sordariomycetes	o__Hypocreales	f__Nectriaceae	g__Xenoacremonium	s__Xenoacremonium_falcatum	0	0	0	0	0	0	0	0	0	0	0	0	0	0	0	0	0	0	0	0	0	0	0	0	0	0	0	0	0	0	0	0	0	0	0	0	0	0	0	0	0	0
116e21e0f52d9116f5229ca0e9b37696	k__Fungi	p__Ascomycota	c__unidentified	o__unidentified	f__unidentified	g__unidentified	s__unidentified	0	0	0	0	0	0	0	0	0	0	0	0	0	0	0	0	0	0	0	0	0	0	0	0	0	0	0	0	0	0	0	0	0	0	0	0	0	0	0	0	0	0
116e2352675d3ffde624d5b8ac5c417a	k__Fungi	p__unidentified	c__unidentified	o__unidentified	f__unidentified	g__unidentified	s__unidentified	0	0	0	0	0	0	0	0	0	0	0	0	0	0	0	0	0	0	0	0	0	0	0	0	0	0	0	0	0	0	0	0	0	0	0	0	0	0	0	0	0	0
117012d478f59658796699a16e13a38a	k__Fungi	p__unidentified	c__unidentified	o__unidentified	f__unidentified	g__unidentified	s__unidentified	0	0	0	0	0	0	0	0	0	0	0	0	0	0	0	0	0	0	0	0	0	0	0	0	0	0	0	0	0	0	0	0	0	0	0	0	0	0	0	0	0	0
117994669a5d7a366c57a407842d148f	k__Fungi	p__unidentified	c__unidentified	o__unidentified	f__unidentified	g__unidentified	s__unidentified	0	0	0	0	0	0	0	0	0	0	0	0	0	0	0	0	0	0	0	0	0	0	0	0	0	0	0	0	0	0	0	0	0	0	0	0	0	0	0	0	0	0
117f060f232ce1acb2bd524084cda069	k__Fungi	p__unidentified	c__unidentified	o__unidentified	f__unidentified	g__unidentified	s__unidentified	0	0	0	0	0	0	0	0	0	0	0	0	0	0	0	0	0	0	0	0	0	0	0	0	0	0	0	0	0	0	0	0	0	0	0	0	0	0	0	0	0	0
11803b322fd007d513fe1cc746e0c784	k__Fungi	p__unidentified	c__unidentified	o__unidentified	f__unidentified	g__unidentified	s__unidentified	0	0	0	0	0	0	0	0	0	0	0	0	0	0	0	0	0	0	0	0	0	0	0	0	0	0	0	0	0	0	0	0	0	0	0	0	0	0	0	0	0	0
11806d7bd5adb80fd9adc451736801b5	k__Fungi	p__Chytridiomycota	c__unidentified	o__unidentified	f__unidentified	g__unidentified	s__unidentified	0	0	0	0	0	0	0	0	0	0	0	0	0	0	0	0	0	0	0	0	0	0	0	0	0	0	0	0	0	0	0	0	0	0	0	0	0	0	0	0	0	0
119021fdf3e63c214113c8660947a949	k__Fungi	p__unidentified	c__unidentified	o__unidentified	f__unidentified	g__unidentified	s__unidentified	0	0	0	0	0	0	0	0	0	0	0	0	0	0	0	0	0	0	0	0	0	0	0	0	0	0	0	0	0	0	0	0	0	0	0	0	0	0	0	0	0	0
1191423531b8120f8d3fcda692a895f5	k__Fungi	p__unidentified	c__unidentified	o__unidentified	f__unidentified	g__unidentified	s__unidentified	0	0	0	0	0	0	0	0	0	0	0	0	0	0	0	0	0	0	0	0	0	0	0	0	0	0	0	0	0	0	0	0	0	0	0	0	0	0	0	0	0	0
11a0a881ec95026194a622c30310622f	k__Fungi	p__unidentified	c__unidentified	o__unidentified	f__unidentified	g__unidentified	s__unidentified	0	0	0	104	0	0	0	0	0	0	19	0	0	0	0	0	0	0	0	0	0	0	0	0	0	0	0	0	0	0	0	0	0	19	0	0	0	0	0	0	0	0
11a42c76b742f5ee14fe6482ecaef51f	k__Fungi	p__unidentified	c__unidentified	o__unidentified	f__unidentified	g__unidentified	s__unidentified	0	0	0	0	0	0	0	0	0	0	0	0	0	0	0	0	0	0	0	0	0	0	0	0	0	0	0	0	0	0	0	0	0	0	0	0	0	0	0	0	0	0
11a9701c0f1cff11c602a9bf84bdc8cb	k__Fungi	p__unidentified	c__unidentified	o__unidentified	f__unidentified	g__unidentified	s__unidentified	0	0	0	0	0	0	0	0	0	0	0	0	0	0	0	0	0	0	0	0	0	0	0	0	0	0	0	0	0	0	0	0	0	0	0	0	0	0	0	0	0	0
11af775e702784f0f43cb86960f3ff85	k__Fungi	p__Ascomycota	c__Leotiomycetes	o__Helotiales	f__unidentified	g__unidentified	s__unidentified	0	0	0	0	0	0	0	0	0	0	0	0	0	0	0	0	0	0	0	0	0	0	0	0	0	0	0	0	0	0	0	0	0	0	0	0	0	0	0	0	0	0
11b54bf52c61e225f78522b783f22f5e	k__Fungi	p__unidentified	c__unidentified	o__unidentified	f__unidentified	g__unidentified	s__unidentified	0	0	0	0	0	0	0	0	0	0	0	0	0	0	0	0	0	0	0	0	0	0	0	0	0	0	0	0	0	0	0	0	0	23	0	0	0	0	0	0	0	0
11b77df02f104393e8dd9149d7f074c1	k__Fungi	p__unidentified	c__unidentified	o__unidentified	f__unidentified	g__unidentified	s__unidentified	0	0	0	0	0	0	0	0	0	0	0	0	0	0	0	0	0	0	0	0	0	0	0	0	0	0	0	0	0	0	0	0	0	0	0	0	0	0	0	0	0	0
11b8df9b9f67d641938c3b04fc6c958f	k__Fungi	p__Chytridiomycota	c__unidentified	o__unidentified	f__unidentified	g__unidentified	s__unidentified	0	0	0	0	0	0	0	0	0	0	0	0	0	0	0	0	0	0	0	0	0	0	0	0	0	0	0	0	0	0	0	0	0	0	0	0	0	0	0	0	0	0
11bc8d4cd78432d793ee34f58c63449c	k__Fungi	p__unidentified	c__unidentified	o__unidentified	f__unidentified	g__unidentified	s__unidentified	0	0	0	0	0	0	0	0	0	0	77	0	0	0	0	0	0	0	0	0	0	0	0	0	0	0	0	0	0	0	0	0	0	0	0	0	0	0	0	0	0	0
11bf03024da9791b66eca1488cbc99ee	k__Fungi	p__Ascomycota	c__Dothideomycetes	o__Pleosporales	f__Phaeosphaeriaceae	g__Juncaceicola	s__unidentified	0	0	0	0	0	0	0	0	0	0	0	0	0	0	0	0	0	0	0	0	0	0	0	0	0	0	0	0	0	0	0	0	0	0	0	0	0	0	0	0	0	0
11ca953ba6ba163ff61c9fa10c64ab98	k__Fungi	p__unidentified	c__unidentified	o__unidentified	f__unidentified	g__unidentified	s__unidentified	0	0	0	0	0	0	0	0	0	0	0	0	0	0	0	0	0	0	0	0	0	0	0	0	0	0	0	0	0	0	0	0	0	0	0	0	0	0	0	0	0	0
11d263e6c7aca29de7dc34a46914a2aa	k__Fungi	p__unidentified	c__unidentified	o__unidentified	f__unidentified	g__unidentified	s__unidentified	0	0	0	0	0	0	0	0	0	0	0	0	0	0	0	0	0	0	0	0	0	0	0	0	0	0	0	0	0	0	0	0	0	0	0	0	0	0	0	0	0	0
11d6a4486936f48ed9c864762221e395	k__Fungi	p__unidentified	c__unidentified	o__unidentified	f__unidentified	g__unidentified	s__unidentified	0	0	14	0	0	0	0	0	0	0	0	0	0	0	0	0	0	0	0	0	0	0	0	0	0	0	0	0	0	0	0	0	0	0	0	0	0	0	0	0	0	0
11d849c0b7897f7bf5584a6aeeca97a4	k__Fungi	p__Chytridiomycota	c__unidentified	o__unidentified	f__unidentified	g__unidentified	s__unidentified	0	0	0	0	0	0	0	0	0	0	0	0	0	0	0	0	0	0	0	0	0	0	0	0	0	0	0	0	0	0	0	0	0	0	0	0	0	0	0	0	0	0
11d8c61ccc6cb278b66f47d925ab9053	k__Fungi	p__unidentified	c__unidentified	o__unidentified	f__unidentified	g__unidentified	s__unidentified	0	0	0	0	0	0	0	0	0	0	0	0	0	0	0	0	0	0	0	0	0	0	0	0	0	0	0	0	0	0	0	0	0	0	0	0	0	0	0	0	0	0
11db1042475c6be9dd2c2b1a5bd956bd	k__Fungi	p__unidentified	c__unidentified	o__unidentified	f__unidentified	g__unidentified	s__unidentified	0	0	0	0	0	0	0	0	0	0	0	0	0	0	0	0	0	0	0	0	0	0	0	0	0	0	0	0	0	0	0	0	0	0	0	0	0	0	0	0	0	0
11eb15ce36862562019e53e1217dc219	k__Fungi	p__unidentified	c__unidentified	o__unidentified	f__unidentified	g__unidentified	s__unidentified	0	0	0	0	0	0	0	0	0	0	0	0	0	7	0	0	0	0	0	0	0	0	0	0	0	0	0	0	0	0	0	0	0	0	0	0	0	0	0	0	0	0
11ebcbfabec483276c9078f958abb28b	k__Fungi	p__unidentified	c__unidentified	o__unidentified	f__unidentified	g__unidentified	s__unidentified	0	0	0	0	0	0	0	0	0	0	0	0	0	0	0	0	0	0	0	0	0	0	0	0	0	0	0	0	0	0	0	0	0	0	0	0	0	0	0	0	0	0
11ee24ead2925a1aa50e57a4cf5820c0	k__Fungi	p__Ascomycota	c__Sordariomycetes	o__Togniniales	f__Togniniaceae	g__Phaeoacremonium	s__unidentified	0	0	0	0	0	0	0	0	0	0	0	0	0	0	0	0	0	0	0	0	0	0	0	0	0	0	0	0	0	0	0	0	0	0	0	0	0	0	0	0	0	0
11ee5d632d871dc135380590f6053080	k__Fungi	p__unidentified	c__unidentified	o__unidentified	f__unidentified	g__unidentified	s__unidentified	0	0	0	0	0	0	0	0	0	0	69	0	0	0	0	0	0	0	0	0	0	0	0	0	0	0	0	0	0	0	0	0	0	0	0	0	0	0	0	0	0	0
11ef31940d223c4b086896362d28e630	k__Fungi	p__Ascomycota	c__Leotiomycetes	o__Helotiales	f__Helotiales_fam_Incertae_sedis	g__Volucrispora	s__Volucrispora_graminea	0	0	0	0	0	0	0	0	0	0	0	0	0	0	0	0	0	0	0	0	0	0	0	0	0	0	0	0	0	0	0	0	0	0	0	0	0	0	0	0	0	0
11f020792dfd87182ca102fa3aaa7be5	k__Fungi	p__Chytridiomycota	c__unidentified	o__unidentified	f__unidentified	g__unidentified	s__unidentified	0	0	0	0	0	0	0	0	0	0	0	0	0	0	0	0	0	0	0	0	0	0	0	0	0	0	0	0	0	0	0	0	0	0	0	0	0	0	0	0	0	0
11f085be2c444e4299f810392f4a6821	k__Fungi	p__unidentified	c__unidentified	o__unidentified	f__unidentified	g__unidentified	s__unidentified	0	0	0	0	0	0	0	0	0	0	0	0	0	0	0	0	0	0	0	0	0	0	0	0	0	0	0	0	0	0	0	0	0	0	0	0	0	0	0	0	0	0
11f29624d1c4d073c7370b0f308b2c23	k__Fungi	p__unidentified	c__unidentified	o__unidentified	f__unidentified	g__unidentified	s__unidentified	0	0	0	0	0	0	0	0	0	0	0	0	0	0	0	0	0	0	0	0	0	0	0	0	0	0	0	0	0	0	0	0	0	0	0	0	0	0	0	0	0	0
11f63cfb42bfbc766ff5281b3c9e53b3	k__Fungi	p__Ascomycota	c__Leotiomycetes	o__Helotiales	f__Helotiales_fam_Incertae_sedis	g__Volucrispora	s__Volucrispora_graminea	0	0	0	0	0	0	0	0	0	0	0	0	0	0	0	0	0	0	0	0	0	0	0	0	0	0	0	0	0	0	15	0	0	0	0	0	0	0	0	0	0	0
11f7df812c4495f66170dc8712e83708	k__Fungi	p__Mortierellomycota	c__Mortierellomycetes	o__Mortierellales	f__unidentified	g__unidentified	s__unidentified	0	0	0	0	0	0	0	0	0	0	0	0	0	0	0	0	0	0	0	0	0	0	0	0	0	0	0	0	0	0	0	0	0	0	0	0	0	0	0	0	0	0
11f90d84a9b313548df767861bc8e907	k__Fungi	p__unidentified	c__unidentified	o__unidentified	f__unidentified	g__unidentified	s__unidentified	0	0	0	0	0	0	0	0	0	0	0	0	0	0	0	0	0	0	0	0	0	0	0	0	0	0	0	0	0	0	0	0	0	0	0	0	0	0	0	0	0	0
11fe8403d6cd9814ae63a3a26329a863	k__Fungi	p__Ascomycota	c__Dothideomycetes	o__Capnodiales	f__Teratosphaeriaceae	g__Oleoguttula	s__unidentified	0	0	0	0	0	0	0	0	0	0	0	0	0	0	0	0	0	0	0	0	0	0	0	0	0	0	0	0	0	0	0	0	0	0	0	0	0	0	0	0	0	0
12012ec39341208b1833f73365b98107	k__Fungi	p__unidentified	c__unidentified	o__unidentified	f__unidentified	g__unidentified	s__unidentified	0	0	0	0	0	0	0	0	0	0	0	0	0	0	0	0	0	0	0	0	0	0	0	0	0	0	11	0	0	0	0	0	0	0	0	0	0	0	0	0	0	0
12052cbbe6d2e9704bf53b25722a0f11	k__Fungi	p__unidentified	c__unidentified	o__unidentified	f__unidentified	g__unidentified	s__unidentified	0	0	0	0	0	0	0	0	0	0	0	0	0	0	0	0	0	0	0	0	0	0	0	0	0	0	0	0	0	0	0	0	0	0	0	0	0	0	0	0	0	0
12085516b9f90a427a1e60e2f84bbf36	k__Fungi	p__Ascomycota	c__Leotiomycetes	o__unidentified	f__unidentified	g__unidentified	s__unidentified	0	0	0	0	0	0	0	0	0	0	0	0	0	0	0	0	0	0	0	0	0	0	0	0	0	0	0	0	0	0	0	0	0	0	0	0	0	0	0	0	0	0
120b470139037b138b4aade7d70809f1	k__Fungi	p__unidentified	c__unidentified	o__unidentified	f__unidentified	g__unidentified	s__unidentified	0	0	0	0	0	0	0	0	0	0	0	0	0	0	0	0	0	0	0	0	0	0	0	0	0	0	0	0	0	0	0	0	0	0	0	0	0	0	0	0	0	0
120e2450c295ddb4aafbd292220e2bc2	k__Fungi	p__unidentified	c__unidentified	o__unidentified	f__unidentified	g__unidentified	s__unidentified	0	0	0	0	0	0	0	0	0	0	0	0	0	0	0	0	0	0	0	0	0	0	0	0	0	0	0	0	0	0	0	0	0	0	0	0	0	0	0	0	0	0
1217100103e65dbd509c9c4d3a1aa606	k__Fungi	p__unidentified	c__unidentified	o__unidentified	f__unidentified	g__unidentified	s__unidentified	0	0	0	0	0	0	0	0	0	0	0	0	0	0	0	0	0	0	0	0	0	0	0	0	0	0	0	0	0	0	0	0	0	0	0	0	0	0	0	0	0	0
1219fa8a8424d211990b1335b383e782	k__Fungi	p__unidentified	c__unidentified	o__unidentified	f__unidentified	g__unidentified	s__unidentified	0	0	0	0	0	0	0	0	0	0	0	0	0	0	0	0	0	0	0	0	0	0	0	0	0	0	0	0	0	0	0	0	0	0	0	0	0	0	0	0	0	0
121d8afdcb640a583217734bc978fcb6	k__Fungi	p__unidentified	c__unidentified	o__unidentified	f__unidentified	g__unidentified	s__unidentified	0	0	0	0	0	0	0	0	0	0	0	0	0	0	0	0	0	0	0	0	0	0	0	0	0	0	0	0	0	0	0	0	0	0	0	0	0	0	0	0	0	0
122164669562f9b7856befc955a10be0	k__Fungi	p__Ascomycota	c__Pezizomycetes	o__Pezizales	f__Pyronemataceae	g__unidentified	s__unidentified	0	0	0	0	0	0	0	0	0	0	0	0	0	0	0	0	0	0	0	0	0	0	0	0	0	0	0	0	0	0	0	0	0	0	0	0	0	0	16	0	0	0
1230a59eea95300783541bae7039f8f5	k__Fungi	p__Ascomycota	c__Eurotiomycetes	o__Eurotiales	f__Trichocomaceae	g__Talaromyces	s__unidentified	0	0	0	0	0	0	0	0	0	0	0	0	0	0	0	0	0	0	0	0	0	0	0	0	0	0	0	0	0	0	0	0	0	0	0	0	0	0	0	0	0	0
123678c6ccfad6935d615c8a518b3c75	k__Fungi	p__Chytridiomycota	c__unidentified	o__unidentified	f__unidentified	g__unidentified	s__unidentified	0	0	0	0	0	0	0	0	0	0	0	0	0	0	0	0	0	0	0	0	0	0	0	0	0	0	0	0	0	0	0	0	0	0	0	0	0	0	0	0	0	0
123bb64132287d1bbc0863baefb4bf7b	k__Fungi	p__unidentified	c__unidentified	o__unidentified	f__unidentified	g__unidentified	s__unidentified	0	0	0	0	0	0	0	0	0	0	0	0	0	0	0	0	0	0	0	0	0	0	0	0	0	0	0	0	0	0	0	0	0	0	0	0	0	0	0	0	0	0
123fa13b0abb1a6f29353d4fce84c09f	k__Fungi	p__unidentified	c__unidentified	o__unidentified	f__unidentified	g__unidentified	s__unidentified	0	0	0	0	0	0	0	0	0	0	0	0	0	0	0	0	0	0	0	0	0	0	0	0	0	0	0	0	0	0	0	0	0	0	0	0	0	0	0	0	0	0
12408259edd69695e7cecdee0ce27031	k__Fungi	p__unidentified	c__unidentified	o__unidentified	f__unidentified	g__unidentified	s__unidentified	0	0	0	0	0	0	0	0	0	0	0	0	0	0	0	0	0	0	0	0	0	0	0	0	0	0	0	0	0	0	0	0	0	0	0	0	0	0	0	0	0	0
1242a0d48409ff284e04fdbd85f104e1	k__Fungi	p__unidentified	c__unidentified	o__unidentified	f__unidentified	g__unidentified	s__unidentified	0	0	0	0	0	0	0	0	0	0	0	0	0	0	0	0	0	0	0	0	0	0	0	0	0	0	0	0	0	0	0	0	0	0	0	0	0	0	0	0	0	0
1246644718304b5fccb410a3c93cbb22	k__Fungi	p__Ascomycota	c__Dothideomycetes	o__Capnodiales	f__Mycosphaerellaceae	g__Zasmidium	s__Zasmidium_fructigenum	0	8	287	0	0	0	0	0	0	0	0	0	0	0	0	0	0	0	0	0	0	0	0	0	0	0	0	0	0	0	0	0	0	0	0	0	0	0	0	0	0	0
124abb38d1688cfeeaed2b271ab48bc2	k__Fungi	p__Chytridiomycota	c__unidentified	o__unidentified	f__unidentified	g__unidentified	s__unidentified	0	0	0	0	0	0	0	0	0	0	0	0	0	0	0	0	0	0	0	0	0	0	0	0	0	0	0	0	0	0	3	0	0	0	0	0	0	0	0	0	0	0
124b1541148043c3dae63ab4ebcbaca6	k__Fungi	p__Ascomycota	c__Sordariomycetes	o__Hypocreales	f__Nectriaceae	g__Xenoacremonium	s__Xenoacremonium_falcatum	0	0	0	0	0	0	0	0	0	0	0	0	0	0	0	0	0	0	0	0	0	0	0	0	0	0	0	0	0	0	0	0	0	0	0	0	0	0	0	0	0	0
124ebed60262da2b734e4ce264b2aea1	k__Fungi	p__unidentified	c__unidentified	o__unidentified	f__unidentified	g__unidentified	s__unidentified	0	0	0	0	0	0	0	0	0	0	0	0	0	0	0	0	0	0	0	0	0	0	0	0	0	0	0	0	0	0	0	0	0	0	0	0	0	0	0	0	0	0
12541d0bb692c574c2f478af3842450f	k__Fungi	p__unidentified	c__unidentified	o__unidentified	f__unidentified	g__unidentified	s__unidentified	0	0	0	0	0	0	0	0	0	0	0	0	0	0	0	0	0	0	0	0	0	0	0	0	0	0	0	0	0	0	0	0	0	0	0	0	0	0	0	0	0	0
125a2f1f85edd291000ffd6aa2052164	k__Fungi	p__unidentified	c__unidentified	o__unidentified	f__unidentified	g__unidentified	s__unidentified	0	0	0	0	0	0	0	0	0	0	11	0	0	0	0	0	0	0	0	0	0	0	0	0	0	0	0	0	8	0	0	0	0	42	0	0	0	0	0	0	0	97
125e65799d5a1621ada7e016b137142e	k__Fungi	p__Ascomycota	c__Dothideomycetes	o__Botryosphaeriales	f__Botryosphaeriaceae	g__Dothiorella	s__unidentified	0	0	0	0	0	0	0	0	0	0	0	0	0	0	10	0	0	0	0	0	0	0	0	0	0	0	0	0	0	0	0	0	0	0	0	0	0	0	0	0	0	0
125f0b33ad69fbd97319bff77f8c2a15	k__Fungi	p__Chytridiomycota	c__unidentified	o__unidentified	f__unidentified	g__unidentified	s__unidentified	0	0	0	0	0	0	0	0	0	0	0	0	0	0	0	0	0	0	0	0	0	0	0	0	0	0	0	0	0	0	0	0	0	0	0	0	0	0	0	0	0	0
126bdcc0c38a8f4078f1d41a013b3e6a	k__Fungi	p__unidentified	c__unidentified	o__unidentified	f__unidentified	g__unidentified	s__unidentified	0	0	0	0	0	0	0	0	0	0	0	0	0	0	0	0	0	0	0	0	0	0	0	0	0	0	0	0	0	0	0	0	0	0	0	0	0	0	0	0	0	0
126e140a857fab18c0e0008c98b21370	k__Fungi	p__unidentified	c__unidentified	o__unidentified	f__unidentified	g__unidentified	s__unidentified	0	0	0	0	0	0	0	0	0	0	0	0	0	0	0	0	0	0	0	0	0	0	0	0	0	0	0	0	0	0	0	0	0	0	0	0	0	0	0	0	0	0
126f00e5c1b0306dd65ebfb7ba34a57c	k__Fungi	p__Chytridiomycota	c__unidentified	o__unidentified	f__unidentified	g__unidentified	s__unidentified	0	0	0	0	0	0	0	0	0	0	0	0	0	0	0	0	0	0	0	0	0	0	0	0	0	0	0	0	0	0	0	0	0	0	0	0	0	0	0	0	0	0
1277d413edb2c8725396712f05598113	k__Fungi	p__unidentified	c__unidentified	o__unidentified	f__unidentified	g__unidentified	s__unidentified	0	0	0	0	0	0	0	0	0	0	0	0	0	0	0	0	0	0	0	0	0	0	0	0	0	0	0	0	0	0	0	0	0	0	0	0	0	0	0	0	0	0
127a3b98815cd523a4e7e227c580d881	k__Fungi	p__unidentified	c__unidentified	o__unidentified	f__unidentified	g__unidentified	s__unidentified	0	0	0	0	0	0	0	0	0	0	0	0	0	0	0	0	0	0	0	0	0	0	0	0	0	0	0	0	0	0	0	0	0	0	0	0	0	0	0	0	0	0
127a3bb4582f2bf0e1083d6521c1bf50	k__Fungi	p__Ascomycota	c__Dothideomycetes	o__Pleosporales	f__Phaeosphaeriaceae	g__Juncaceicola	s__unidentified	0	0	0	0	0	0	0	0	0	0	0	0	0	0	0	0	0	0	0	0	0	0	0	0	0	0	0	0	0	0	0	0	0	0	0	0	0	0	0	0	0	0
127ede1265be39b85aa06cdf43038f28	k__Fungi	p__Basidiomycota	c__Microbotryomycetes	o__Kriegeriales	f__Camptobasidiaceae	g__unidentified	s__unidentified	0	0	0	0	0	0	0	0	0	0	0	0	0	0	0	0	0	0	0	0	0	0	0	0	0	0	0	0	0	0	0	0	0	0	0	0	0	0	0	0	0	0
12824633e990f55bd7aebeee61ef11cf	k__Fungi	p__unidentified	c__unidentified	o__unidentified	f__unidentified	g__unidentified	s__unidentified	0	0	0	0	0	0	0	0	0	0	122	0	0	0	0	0	0	0	0	0	0	0	0	0	0	0	0	0	0	0	0	0	0	0	0	0	0	0	0	0	0	0
12846ec3d8b58573d25fda84f419d073	k__Fungi	p__unidentified	c__unidentified	o__unidentified	f__unidentified	g__unidentified	s__unidentified	0	0	0	0	0	0	0	0	0	0	0	0	0	0	0	0	0	0	0	0	0	0	0	0	0	0	0	0	0	0	0	0	0	0	0	0	0	0	0	0	0	0
1286811239e195c57c48f2434d6c2f48	k__Fungi	p__unidentified	c__unidentified	o__unidentified	f__unidentified	g__unidentified	s__unidentified	0	0	0	0	0	0	0	0	0	0	0	0	0	0	0	0	0	0	0	0	0	0	0	0	0	0	0	0	0	0	0	0	0	0	0	0	0	0	0	0	0	0
1288b283b23f0bf79f1fbc02bd311287	k__Fungi	p__Basidiomycota	c__Tremellomycetes	o__Tremellales	f__Bulleribasidiaceae	g__Vishniacozyma	s__unidentified	0	0	0	0	0	0	0	0	0	0	0	0	12	0	0	0	0	0	0	0	0	0	0	0	0	0	0	0	0	0	0	0	0	0	0	0	0	0	0	0	0	0
128a01347440edcc2f52c6362436ad84	k__Fungi	p__Basidiomycota	c__Agaricomycetes	o__Thelephorales	f__Thelephoraceae	g__unidentified	s__unidentified	0	0	0	0	0	0	0	0	0	0	0	0	0	0	0	0	0	0	0	0	0	0	0	0	0	0	0	0	0	0	0	0	0	0	0	0	0	0	0	0	0	0
128b65b173b69b8418122dfdf4cb242d	k__Fungi	p__unidentified	c__unidentified	o__unidentified	f__unidentified	g__unidentified	s__unidentified	0	0	0	0	0	0	0	0	0	0	0	0	0	0	0	0	0	0	0	0	0	0	0	0	0	0	0	0	0	0	0	0	0	0	0	0	0	0	0	0	0	0
128f9fe0eb039c9537b4982a807c062c	k__Fungi	p__unidentified	c__unidentified	o__unidentified	f__unidentified	g__unidentified	s__unidentified	0	0	0	0	0	0	0	0	0	0	0	0	0	0	0	0	0	0	0	0	0	0	0	0	0	0	0	0	0	0	0	0	0	0	0	0	0	0	0	0	0	0
128fc1ec6ae4d241d913180be6f6281e	k__Fungi	p__unidentified	c__unidentified	o__unidentified	f__unidentified	g__unidentified	s__unidentified	0	0	25	0	0	0	0	0	0	0	0	0	0	0	0	0	0	0	0	0	0	0	0	0	0	0	0	0	0	0	0	0	0	0	0	0	0	0	0	0	0	0
128ffbbc90e949115f9b07ee82bb5701	k__Fungi	p__unidentified	c__unidentified	o__unidentified	f__unidentified	g__unidentified	s__unidentified	0	0	0	0	0	0	0	0	0	0	0	0	0	0	0	0	0	0	0	0	0	0	0	0	0	0	0	0	0	26	0	0	0	0	0	0	0	0	0	0	0	0
1295f155a8bf7401d0ab7d791b76c49d	k__Fungi	p__unidentified	c__unidentified	o__unidentified	f__unidentified	g__unidentified	s__unidentified	0	0	0	0	0	0	0	0	0	0	0	0	0	0	0	15	0	0	0	0	0	0	0	0	0	0	0	0	0	0	0	0	0	0	0	0	0	0	0	0	0	0
129cd876ee1bada1d856aa6caf255a60	k__Fungi	p__unidentified	c__unidentified	o__unidentified	f__unidentified	g__unidentified	s__unidentified	0	0	0	0	0	0	0	0	0	0	0	0	0	0	0	0	0	0	0	0	0	0	0	0	0	0	0	0	0	0	0	0	0	0	0	0	0	0	0	0	0	0
129ce38d239a662f9aeaa121d027f6c1	k__Fungi	p__unidentified	c__unidentified	o__unidentified	f__unidentified	g__unidentified	s__unidentified	0	0	0	0	0	0	0	0	0	0	0	0	0	0	0	0	0	0	0	0	0	0	0	0	0	0	0	0	0	0	0	0	0	0	0	0	0	0	0	0	0	0
12a155e119a25d26596da6c0711687ee	k__Fungi	p__unidentified	c__unidentified	o__unidentified	f__unidentified	g__unidentified	s__unidentified	0	0	0	0	0	0	0	0	0	0	0	0	0	0	0	0	0	8	0	30	0	0	0	0	0	0	0	0	0	0	0	0	0	0	0	0	0	0	0	0	0	0
12a4016027f4f80dc67a798e0521950b	k__Fungi	p__unidentified	c__unidentified	o__unidentified	f__unidentified	g__unidentified	s__unidentified	0	0	0	0	0	0	166	0	0	0	0	0	40	0	0	0	0	0	0	0	0	0	0	0	0	0	0	0	0	0	0	0	0	0	0	0	0	64	0	0	0	0
12b22435c5b56fd4cf32a9014af69773	k__Fungi	p__unidentified	c__unidentified	o__unidentified	f__unidentified	g__unidentified	s__unidentified	0	0	0	0	0	0	0	0	0	0	0	0	0	0	0	0	0	0	0	0	0	0	0	0	0	0	0	0	0	0	0	0	0	0	0	0	0	0	0	0	0	0
12b5ecc3d177b3e70042225228d3e78f	k__Fungi	p__unidentified	c__unidentified	o__unidentified	f__unidentified	g__unidentified	s__unidentified	0	0	0	0	0	0	0	0	0	0	0	0	0	0	0	0	0	0	0	0	0	0	0	0	0	0	0	0	0	0	0	0	0	0	0	0	0	0	0	0	0	0
12b710bb702a42915cb90c7cc8274128	k__Fungi	p__Chytridiomycota	c__unidentified	o__unidentified	f__unidentified	g__unidentified	s__unidentified	0	0	0	0	0	0	0	0	0	0	0	0	0	0	0	0	0	0	0	0	0	0	0	0	0	0	0	0	0	0	0	0	0	0	0	0	0	0	0	0	0	0
12b89501950e5676362a392a06ea9384	k__Fungi	p__unidentified	c__unidentified	o__unidentified	f__unidentified	g__unidentified	s__unidentified	0	0	0	0	0	0	0	0	0	0	0	0	0	0	0	0	0	0	0	0	0	0	0	0	0	0	0	0	0	0	0	0	0	0	0	0	0	0	0	0	0	0
12bbf88f5c9a9adaffd5d84bc1f1538c	k__Fungi	p__unidentified	c__unidentified	o__unidentified	f__unidentified	g__unidentified	s__unidentified	0	0	0	0	0	0	0	0	0	0	0	0	0	0	0	0	0	0	0	0	0	0	0	0	0	0	0	0	0	0	0	0	0	0	0	0	0	0	0	0	0	0
12bc4128a65332ab27d45f4f3b864db1	k__Fungi	p__unidentified	c__unidentified	o__unidentified	f__unidentified	g__unidentified	s__unidentified	0	0	0	0	0	0	0	0	0	0	0	0	0	0	0	0	0	0	0	0	0	0	0	0	0	0	0	0	0	0	0	0	0	0	0	0	0	0	0	0	0	0
12c0f32d39e55957d901e91abf5652fb	k__Fungi	p__Ascomycota	c__Eurotiomycetes	o__Eurotiales	f__Aspergillaceae	g__Penicillium	s__Penicillium_carneum	0	0	0	0	0	0	0	0	0	0	0	0	0	0	0	0	0	0	0	0	0	0	0	0	0	0	0	0	0	0	0	0	0	0	0	0	0	0	0	0	0	0
12c69f2dc93d3fa53425d44083ebfd8c	k__Fungi	p__unidentified	c__unidentified	o__unidentified	f__unidentified	g__unidentified	s__unidentified	0	0	0	0	0	0	0	0	0	0	0	0	0	0	0	0	0	0	0	0	0	0	0	0	0	0	0	0	0	0	0	0	0	0	0	0	0	0	0	0	0	0
12c7b6a47dabe096f5979ad2d6f07f5f	k__Fungi	p__Ascomycota	c__Leotiomycetes	o__Helotiales	f__Hyaloscyphaceae	g__Calycina	s__unidentified	0	0	0	0	0	0	0	0	0	0	0	0	0	0	0	0	0	0	0	0	0	0	0	0	0	0	0	0	0	0	0	0	0	0	0	0	0	0	0	0	0	0
12d00e2794deeefaf67f45d3ac626748	k__Fungi	p__Chytridiomycota	c__unidentified	o__unidentified	f__unidentified	g__unidentified	s__unidentified	0	0	0	0	0	0	0	0	0	0	0	0	0	0	0	0	0	0	0	0	0	0	0	0	0	0	0	0	0	0	0	0	0	0	0	0	0	0	0	0	0	0
12d46eb6e2c263e868316da90a5e09d0	k__Fungi	p__unidentified	c__unidentified	o__unidentified	f__unidentified	g__unidentified	s__unidentified	0	0	0	0	0	0	0	0	0	0	0	0	0	0	0	0	0	0	0	2	0	0	0	0	0	0	0	0	0	0	0	0	0	0	0	0	0	0	0	0	0	0
12d5716edbbe62393acfe883a6b8531f	k__Fungi	p__unidentified	c__unidentified	o__unidentified	f__unidentified	g__unidentified	s__unidentified	0	0	0	0	0	0	0	0	0	0	0	0	0	0	0	0	0	0	0	0	0	0	0	0	0	0	0	0	0	0	0	0	0	0	0	0	0	0	0	0	0	0
12e289075a7bd6644b8f6be5281660d4	k__Fungi	p__Chytridiomycota	c__unidentified	o__unidentified	f__unidentified	g__unidentified	s__unidentified	0	0	0	0	0	0	0	0	0	0	0	0	0	0	0	0	0	0	0	0	0	0	0	0	0	0	0	0	0	0	0	0	0	0	0	0	0	0	0	0	0	0
12e834553f6787ba40c916296a7d93c5	k__Fungi	p__unidentified	c__unidentified	o__unidentified	f__unidentified	g__unidentified	s__unidentified	0	0	0	0	0	0	0	0	0	0	0	0	0	0	0	0	0	0	0	0	0	0	0	0	0	0	0	0	0	0	0	0	0	0	0	0	0	0	0	0	0	0
12e90dceb4d3aaa1356b432b91d43c75	k__Fungi	p__unidentified	c__unidentified	o__unidentified	f__unidentified	g__unidentified	s__unidentified	0	12	0	0	0	0	0	0	0	0	0	0	0	0	0	0	0	0	0	0	0	0	0	0	0	0	0	0	0	0	0	0	0	0	0	0	0	0	0	0	0	0
12ec5dabcdcb2624b75f6d46e1e08542	k__Fungi	p__unidentified	c__unidentified	o__unidentified	f__unidentified	g__unidentified	s__unidentified	0	5651	2915	0	0	6189	0	0	0	0	0	0	0	10439	0	0	0	0	0	0	0	0	0	0	0	0	0	0	0	0	0	513	0	0	10352	3722	0	0	9575	10633	0	0
12f6f56dccfa01c168ee43b2fb23d9a7	k__Fungi	p__unidentified	c__unidentified	o__unidentified	f__unidentified	g__unidentified	s__unidentified	0	0	0	0	0	0	0	0	0	0	0	13	0	0	0	0	0	0	0	0	0	0	0	0	0	0	0	0	0	0	0	0	0	0	0	0	0	0	0	0	0	0
12f9d2bfb19dd1266881aefb4c2887af	k__Fungi	p__unidentified	c__unidentified	o__unidentified	f__unidentified	g__unidentified	s__unidentified	0	0	0	0	0	0	0	0	0	0	0	0	0	0	0	0	0	0	0	0	0	0	0	0	0	0	0	0	0	0	0	0	0	0	0	0	0	0	0	0	0	0
12fb4797dc92dca4848c667375ce876c	k__Fungi	p__Ascomycota	c__Eurotiomycetes	o__Eurotiales	f__Aspergillaceae	g__Aspergillus	s__unidentified	0	0	0	0	0	0	0	0	0	0	0	0	0	0	0	0	0	0	0	0	0	0	0	0	0	0	0	0	0	0	0	0	0	0	0	0	0	0	0	0	0	0
12ffed63fabc8ccc56d54a2613da1165	k__Fungi	p__unidentified	c__unidentified	o__unidentified	f__unidentified	g__unidentified	s__unidentified	0	0	0	0	0	0	0	0	0	0	0	0	0	0	0	0	0	0	0	0	0	0	0	0	0	0	7	0	0	0	0	0	0	0	0	0	0	0	0	0	0	0
130307649c6224f0fa5534f6ac6fa63e	k__Fungi	p__unidentified	c__unidentified	o__unidentified	f__unidentified	g__unidentified	s__unidentified	0	0	0	0	0	0	0	0	0	0	0	0	0	0	0	0	0	0	0	0	0	0	0	0	0	0	0	0	0	0	0	0	0	0	0	0	0	0	0	0	0	0
130baa9b69d39cbb92643ccbb8ba51c1	k__Fungi	p__unidentified	c__unidentified	o__unidentified	f__unidentified	g__unidentified	s__unidentified	0	0	0	0	0	0	0	0	0	0	0	0	28	0	0	0	0	0	0	0	23	0	0	0	0	0	0	0	0	0	0	0	0	0	0	0	0	0	0	0	0	0
130d5eb4fde7bf096efcc49ed47976d2	k__Fungi	p__unidentified	c__unidentified	o__unidentified	f__unidentified	g__unidentified	s__unidentified	0	0	0	0	0	0	0	0	0	0	0	0	0	0	0	0	0	0	0	0	0	0	0	0	0	0	0	0	0	0	0	0	0	0	0	0	0	0	0	0	0	0
13106c51d8d2fdc61286628041468980	k__Fungi	p__unidentified	c__unidentified	o__unidentified	f__unidentified	g__unidentified	s__unidentified	0	0	0	0	0	0	0	0	0	0	0	0	0	0	0	0	0	0	0	0	0	0	0	0	0	0	0	0	0	0	0	0	0	0	0	0	0	0	0	0	0	0
131099cae8258977e1aca4cf064100ff	k__Fungi	p__unidentified	c__unidentified	o__unidentified	f__unidentified	g__unidentified	s__unidentified	0	0	0	0	0	0	0	0	0	0	0	0	0	0	0	0	0	0	0	0	0	0	0	0	0	0	0	0	0	0	0	0	0	0	0	0	0	0	0	0	0	0
1314bbeeb68a9a20eef3ed86b236eeb0	k__Fungi	p__unidentified	c__unidentified	o__unidentified	f__unidentified	g__unidentified	s__unidentified	303	0	0	0	0	0	0	49	0	0	0	0	0	0	0	0	0	0	0	0	0	0	0	0	0	0	0	0	0	0	0	0	0	0	0	0	0	0	0	0	0	0
131949f38f36b756978f1fc733fe8844	k__Fungi	p__Chytridiomycota	c__unidentified	o__unidentified	f__unidentified	g__unidentified	s__unidentified	0	0	0	0	0	0	0	0	0	0	0	0	0	0	0	0	0	0	0	0	0	0	0	0	0	0	0	0	0	0	0	0	0	0	0	0	0	0	0	0	0	0
13198ff140c124e58dbc6cd505b26791	k__Fungi	p__unidentified	c__unidentified	o__unidentified	f__unidentified	g__unidentified	s__unidentified	0	0	0	0	0	0	0	0	9	0	0	0	0	0	0	0	0	0	0	0	0	0	0	0	0	0	0	0	0	0	0	0	0	0	0	0	0	0	0	0	0	0
131b1dab30a15b90f5cc979fe67467dc	k__Fungi	p__unidentified	c__unidentified	o__unidentified	f__unidentified	g__unidentified	s__unidentified	0	0	0	0	0	0	0	0	0	0	0	0	0	0	0	0	0	0	0	0	0	0	0	0	0	0	0	0	0	0	0	0	0	0	0	0	0	0	0	0	0	0
1326d17e33ead40b30602e8579b5ce42	k__Fungi	p__unidentified	c__unidentified	o__unidentified	f__unidentified	g__unidentified	s__unidentified	0	0	0	0	0	0	0	0	0	0	0	0	0	0	0	0	0	0	0	0	0	0	0	0	0	0	0	0	0	0	0	0	0	0	0	0	0	0	0	0	0	0
132917d385c8ca25f9bbb78e3f3ff17f	k__Fungi	p__Ascomycota	c__Leotiomycetes	o__Helotiales	f__unidentified	g__unidentified	s__unidentified	0	0	0	0	0	0	0	0	0	0	0	0	0	0	0	0	0	0	0	0	0	0	0	0	0	0	0	0	0	0	0	0	0	0	0	0	0	0	0	0	0	0
132b0598f1baa08e4990ff463a9a496d	k__Fungi	p__unidentified	c__unidentified	o__unidentified	f__unidentified	g__unidentified	s__unidentified	0	0	0	0	0	0	0	0	0	0	0	0	0	0	0	0	0	0	0	0	0	0	0	0	0	0	0	0	0	0	0	0	0	0	0	0	0	0	0	0	0	0
132b08062008ff5b270db31f9ebd2d2d	k__Fungi	p__Ascomycota	c__Sordariomycetes	o__Hypocreales	f__Nectriaceae	g__Xenoacremonium	s__Xenoacremonium_falcatum	0	0	0	17	0	0	0	0	0	0	0	0	0	0	0	0	0	0	0	0	0	0	0	0	0	0	0	0	0	0	0	0	0	0	0	0	0	0	0	0	0	0
132b7ef6443a70fe5e046a81bccdf6fd	k__Fungi	p__unidentified	c__unidentified	o__unidentified	f__unidentified	g__unidentified	s__unidentified	0	0	0	0	0	0	0	0	0	0	0	0	0	0	0	0	10	0	0	0	0	0	0	0	0	0	0	0	0	0	0	0	0	0	0	0	0	0	0	0	0	0
132fafc3bf8904f840b7171ffa5242e4	k__Fungi	p__unidentified	c__unidentified	o__unidentified	f__unidentified	g__unidentified	s__unidentified	0	0	0	0	0	0	0	0	0	0	0	0	0	0	0	0	0	0	0	0	0	0	0	0	0	0	0	0	0	0	0	0	0	0	0	0	0	0	0	0	0	0
1331a7a7814aea9576d3f6857cc63169	k__Fungi	p__unidentified	c__unidentified	o__unidentified	f__unidentified	g__unidentified	s__unidentified	0	0	0	0	0	0	0	0	0	0	0	0	0	0	0	0	0	0	0	0	0	0	0	0	0	0	0	0	0	0	3	0	0	0	0	0	0	0	0	0	0	0
1331d486b903003751c127339fd181ac	k__Fungi	p__unidentified	c__unidentified	o__unidentified	f__unidentified	g__unidentified	s__unidentified	0	0	0	0	0	0	0	0	0	0	0	0	0	0	0	0	0	0	0	0	0	0	0	0	0	0	0	0	0	0	0	0	0	0	0	0	0	0	0	0	0	0
1335e4fa71914ae8d197f9550dffe5b0	k__Fungi	p__Mortierellomycota	c__Mortierellomycetes	o__Mortierellales	f__Mortierellaceae	g__Mortierella	s__Mortierella_antarctica	0	0	0	0	0	0	0	0	0	0	0	0	0	0	0	0	0	0	0	0	0	0	0	0	0	0	0	0	0	0	0	0	0	0	0	0	0	0	0	0	0	0
13379c8952ff6a7b90b72dc27725f39a	k__Fungi	p__unidentified	c__unidentified	o__unidentified	f__unidentified	g__unidentified	s__unidentified	0	0	0	0	0	0	0	0	0	0	0	0	0	0	0	0	0	0	0	0	0	0	0	0	0	0	0	0	0	0	0	0	0	0	0	0	0	0	0	0	0	0
1343c71f437f8637c9fcaebc0b9bb048	k__Fungi	p__unidentified	c__unidentified	o__unidentified	f__unidentified	g__unidentified	s__unidentified	0	0	0	0	0	0	0	0	0	0	0	0	0	0	0	0	0	0	0	0	0	0	0	0	0	223	0	0	0	0	0	0	0	0	0	0	0	0	0	0	0	0
13462b9b76aef464d51fa4a1899ec910	k__Fungi	p__unidentified	c__unidentified	o__unidentified	f__unidentified	g__unidentified	s__unidentified	0	0	0	0	0	0	0	0	0	0	0	0	0	0	0	0	0	0	0	0	0	0	0	0	0	0	0	0	0	0	0	0	0	0	0	0	0	0	0	0	0	0
134640004234b21560173b1a80636eaa	k__Fungi	p__unidentified	c__unidentified	o__unidentified	f__unidentified	g__unidentified	s__unidentified	0	0	0	9	0	0	0	0	0	0	0	0	0	0	0	0	0	0	0	0	0	0	0	0	0	0	0	0	0	0	0	0	0	0	0	0	0	0	0	0	0	0
13496c95c79634ad9ef05d210c2ff171	k__Fungi	p__unidentified	c__unidentified	o__unidentified	f__unidentified	g__unidentified	s__unidentified	0	0	0	0	0	0	0	0	0	0	0	0	0	0	0	0	0	0	0	0	0	0	0	0	0	0	0	0	0	0	0	0	0	0	0	0	0	0	0	0	0	0
1350224604a23772ccc214f45f3b7dcb	k__Fungi	p__Ascomycota	c__Leotiomycetes	o__Helotiales	f__unidentified	g__unidentified	s__unidentified	0	0	0	0	0	0	0	0	0	0	0	0	0	0	0	0	0	0	0	0	0	0	0	0	0	0	0	0	0	0	0	0	0	0	0	0	0	0	0	0	0	0
13507d58fe616405b8c9b374265808f9	k__Fungi	p__Chytridiomycota	c__unidentified	o__unidentified	f__unidentified	g__unidentified	s__unidentified	0	0	0	0	0	0	0	0	0	0	0	0	0	0	0	0	0	0	0	0	0	0	0	0	0	0	0	0	0	0	0	0	0	0	0	0	0	0	0	0	0	0
1355287c523bfdc99cea3beeca3898c0	k__Fungi	p__unidentified	c__unidentified	o__unidentified	f__unidentified	g__unidentified	s__unidentified	0	0	0	0	0	0	0	0	0	0	0	0	0	0	0	0	0	0	0	0	0	0	0	0	0	0	0	0	0	0	0	0	0	0	0	0	0	0	0	0	0	0
13575a56b1b23063c0fb36d94c869757	k__Fungi	p__Rozellomycota	c__unidentified	o__unidentified	f__unidentified	g__unidentified	s__unidentified	0	0	0	0	0	0	2	0	0	0	0	0	0	0	0	0	0	0	0	0	0	0	0	0	0	0	0	0	0	0	0	0	0	0	0	0	0	0	0	0	0	0
135a4aa103f352f2875f979b0422eec1	k__Fungi	p__Ascomycota	c__Leotiomycetes	o__Helotiales	f__unidentified	g__unidentified	s__unidentified	0	0	0	0	0	0	0	0	0	0	0	0	0	0	0	0	0	0	0	0	0	0	0	0	0	0	0	0	0	0	0	0	0	0	0	0	0	0	0	0	0	0
135c4071b652882d155892ee296f14ab	k__Fungi	p__Ascomycota	c__Leotiomycetes	o__Helotiales	f__Leotiaceae	g__Neobulgaria	s__unidentified	0	0	0	0	0	0	0	0	0	0	0	0	0	0	0	0	0	0	0	0	0	0	0	0	0	0	0	0	0	0	0	0	0	0	0	0	0	0	0	0	0	0
13616a28894a651c113587b290bb2b69	k__Fungi	p__unidentified	c__unidentified	o__unidentified	f__unidentified	g__unidentified	s__unidentified	0	0	0	0	0	0	0	0	0	0	0	0	0	0	0	0	0	0	0	0	0	0	0	0	0	0	0	0	0	0	0	0	0	0	0	0	0	0	0	0	0	0
13654163a753b93d9f34ec5797b746cc	k__Fungi	p__unidentified	c__unidentified	o__unidentified	f__unidentified	g__unidentified	s__unidentified	0	0	0	0	0	0	0	0	0	0	0	0	0	0	0	0	0	0	0	0	0	0	0	0	0	0	0	0	0	0	0	0	0	0	0	0	0	0	0	0	0	0
1365681f138fee5ca19d28569ab6fa70	k__Fungi	p__Ascomycota	c__unidentified	o__unidentified	f__unidentified	g__unidentified	s__unidentified	0	0	0	0	0	0	0	0	0	0	0	0	0	0	0	0	0	0	0	0	0	0	0	0	0	0	0	0	0	0	0	0	0	0	0	0	0	0	0	0	0	0
1369e89589b4ce15c9afef4e4f5bf211	k__Fungi	p__Mortierellomycota	c__Mortierellomycetes	o__Mortierellales	f__Mortierellaceae	g__Mortierella	s__unidentified	0	0	0	0	0	0	0	0	0	0	0	0	0	0	0	0	0	0	0	0	0	0	0	0	0	0	0	0	0	0	0	0	0	0	0	0	0	0	0	0	0	0
136be656b89651c29ab67b3055884ff8	k__Fungi	p__unidentified	c__unidentified	o__unidentified	f__unidentified	g__unidentified	s__unidentified	0	0	0	0	0	0	0	0	0	0	0	0	0	0	0	0	0	0	0	0	0	0	0	0	0	0	0	0	0	0	0	0	0	0	0	0	0	0	0	0	0	0
136fe189e6f2288fc9f3f9d7fca9f3eb	k__Fungi	p__Chytridiomycota	c__unidentified	o__unidentified	f__unidentified	g__unidentified	s__unidentified	0	0	0	0	0	0	0	0	0	0	0	0	0	0	0	0	0	0	0	0	0	0	0	0	0	0	0	0	0	0	0	0	0	0	0	0	0	0	0	0	0	0
136ff6a62497dff61b9b38fe2dfc0555	k__Fungi	p__unidentified	c__unidentified	o__unidentified	f__unidentified	g__unidentified	s__unidentified	0	0	0	0	0	0	0	0	0	0	0	0	0	0	0	0	0	0	0	0	0	0	0	0	0	0	0	0	0	0	0	0	0	0	0	0	0	0	0	0	0	0
1379b2ae7d9267e01b699eb88fdd61c0	k__Fungi	p__Ascomycota	c__Eurotiomycetes	o__unidentified	f__unidentified	g__unidentified	s__unidentified	0	0	0	0	0	0	0	0	0	0	0	0	0	0	0	0	0	0	0	0	0	0	0	0	0	0	0	0	0	0	0	0	0	0	0	0	0	0	0	0	0	0
137e5a729ecf704df532a427837528fc	k__Fungi	p__Ascomycota	c__Dothideomycetes	o__Capnodiales	f__Teratosphaeriaceae	g__Recurvomyces	s__unidentified	0	0	0	0	0	0	0	0	0	0	0	0	0	0	0	0	0	0	0	0	0	0	0	0	0	0	0	0	0	0	0	0	0	0	0	0	0	0	0	0	0	0
13802eae2b6a83b00620e24e7b98f7d5	k__Fungi	p__unidentified	c__unidentified	o__unidentified	f__unidentified	g__unidentified	s__unidentified	0	0	0	0	0	0	0	0	0	0	0	0	0	0	0	0	0	0	0	0	0	0	0	0	0	0	0	0	0	0	0	0	0	0	0	0	0	0	0	0	0	0
1381c4bf94c4b0504c47ffdea447a47e	k__Fungi	p__unidentified	c__unidentified	o__unidentified	f__unidentified	g__unidentified	s__unidentified	0	0	0	0	0	0	0	0	0	0	0	0	0	0	0	0	0	0	0	0	0	0	0	0	0	0	0	0	0	0	0	0	0	0	0	0	0	0	0	0	0	0
1387ff1bfb95ebab34144fd8499dba7d	k__Fungi	p__unidentified	c__unidentified	o__unidentified	f__unidentified	g__unidentified	s__unidentified	0	0	0	0	0	0	0	0	0	0	0	0	0	0	0	0	0	0	0	0	0	0	0	0	0	0	0	0	0	0	0	0	0	0	0	0	0	0	0	0	0	0
13890500ad8004c345f3c48599f2f58d	k__Fungi	p__unidentified	c__unidentified	o__unidentified	f__unidentified	g__unidentified	s__unidentified	0	0	0	0	0	0	0	0	0	0	0	0	0	0	0	0	0	0	0	0	0	0	0	0	0	0	0	0	0	0	0	0	0	0	0	0	0	0	0	0	0	0
138acab6f18d458f8d4059575c41f1b5	k__Fungi	p__unidentified	c__unidentified	o__unidentified	f__unidentified	g__unidentified	s__unidentified	0	0	10	0	0	0	0	0	0	0	0	0	0	0	0	0	0	0	0	0	0	0	0	0	0	0	0	0	0	0	0	0	0	0	0	0	0	0	0	0	0	0
13a1189d51a3e240f501daac47aa4733	k__Fungi	p__unidentified	c__unidentified	o__unidentified	f__unidentified	g__unidentified	s__unidentified	0	0	64	0	0	0	0	0	0	0	0	0	0	0	0	0	0	0	0	0	0	0	0	0	0	0	0	0	0	0	0	0	0	0	0	0	0	0	0	0	0	0
13a86fc600d66205a607990cbb0a4f5c	k__Fungi	p__unidentified	c__unidentified	o__unidentified	f__unidentified	g__unidentified	s__unidentified	0	0	0	0	0	0	0	0	0	0	0	0	0	0	0	0	0	0	0	0	0	0	0	0	0	0	0	0	0	0	0	0	0	0	0	0	0	0	0	0	0	0
13ac9a2d38b56e714d34442c5e4c19d5	k__Fungi	p__Ascomycota	c__Eurotiomycetes	o__Chaetothyriales	f__Herpotrichiellaceae	g__unidentified	s__unidentified	0	0	0	0	0	0	0	0	0	0	0	0	0	0	29	0	0	0	0	0	0	0	0	0	0	0	0	0	0	0	0	0	0	0	0	0	0	0	0	0	0	0
13b1ac593bf88a37d3c50cdd380f4d78	k__Fungi	p__unidentified	c__unidentified	o__unidentified	f__unidentified	g__unidentified	s__unidentified	0	0	0	0	0	0	0	0	0	0	0	0	0	0	0	0	0	0	0	0	0	0	0	0	0	0	0	0	0	13	0	0	0	0	0	0	0	0	0	0	0	0
13c07d88e808da108df61fa0a7450731	k__Fungi	p__unidentified	c__unidentified	o__unidentified	f__unidentified	g__unidentified	s__unidentified	0	0	0	0	0	0	0	0	0	0	0	0	0	0	0	0	0	0	0	0	0	0	0	0	0	0	0	0	0	0	0	0	0	0	0	0	0	0	0	0	0	0
13c1bd3a16aed43c814007113ee84e15	k__Fungi	p__unidentified	c__unidentified	o__unidentified	f__unidentified	g__unidentified	s__unidentified	0	0	0	0	0	0	0	0	0	0	0	7	0	0	0	0	0	0	0	0	0	0	0	0	0	0	0	0	0	0	0	0	0	0	0	0	0	0	0	0	0	0
13c94f9090c4f0b80d342ac1e2843eb6	k__Fungi	p__Ascomycota	c__Leotiomycetes	o__Helotiales	f__unidentified	g__unidentified	s__unidentified	0	0	0	0	0	0	0	0	0	0	0	0	0	0	0	0	0	0	0	0	0	0	0	0	0	0	0	0	0	0	0	0	0	0	0	0	0	0	0	0	0	0
13cb53a39420e5eb644a7d3c6ceedbb1	k__Fungi	p__unidentified	c__unidentified	o__unidentified	f__unidentified	g__unidentified	s__unidentified	0	0	0	0	0	0	0	0	0	0	0	0	0	0	0	0	0	0	0	0	0	0	0	0	0	0	0	0	0	0	0	0	0	0	0	0	0	0	0	0	0	0
13cc8346b29aeaa7fb7adc3f5adab0e7	k__Fungi	p__unidentified	c__unidentified	o__unidentified	f__unidentified	g__unidentified	s__unidentified	0	0	0	0	0	0	0	0	0	0	0	0	0	0	0	0	0	0	0	0	22	0	0	0	0	0	0	0	0	0	0	0	0	0	0	0	0	0	0	0	0	0
13ce12824112a3715dc281650664d410	k__Fungi	p__unidentified	c__unidentified	o__unidentified	f__unidentified	g__unidentified	s__unidentified	0	3	0	0	0	0	0	0	0	0	0	0	0	0	0	0	0	0	0	0	0	0	0	0	0	0	0	0	0	0	0	0	0	0	0	0	0	0	0	0	0	0
13d6bb247d68bd9f16c4827cda7f6f25	k__Fungi	p__unidentified	c__unidentified	o__unidentified	f__unidentified	g__unidentified	s__unidentified	0	0	0	0	0	0	0	0	0	0	0	0	0	0	0	0	0	0	0	0	0	0	0	0	0	0	0	0	0	0	0	0	0	0	0	0	0	0	0	0	0	0
13d716fd059ab57cce9876f093b17014	k__Fungi	p__Ascomycota	c__Leotiomycetes	o__Helotiales	f__Helotiaceae	g__Tetracladium	s__unidentified	0	0	0	0	0	0	0	0	0	0	0	0	0	0	0	0	0	0	0	0	0	0	0	0	0	0	0	0	0	0	0	0	0	0	0	0	0	0	0	0	0	0
13d8709ffc7df78e315b09b88724eeac	k__Fungi	p__Chytridiomycota	c__unidentified	o__unidentified	f__unidentified	g__unidentified	s__unidentified	0	0	0	0	0	0	0	0	0	0	0	0	0	0	0	0	0	0	0	0	0	0	0	0	0	0	0	0	0	0	0	0	0	0	0	0	0	0	0	0	0	0
13da04b5c5213cb559ff346b498245d0	k__Fungi	p__Chytridiomycota	c__unidentified	o__unidentified	f__unidentified	g__unidentified	s__unidentified	0	0	0	0	0	0	0	0	0	0	0	0	0	0	0	0	0	0	0	0	0	0	0	0	0	0	0	0	0	0	0	0	0	0	0	0	0	0	0	0	0	0
13da66720eddfc7c11c32ac331eb2303	k__Fungi	p__unidentified	c__unidentified	o__unidentified	f__unidentified	g__unidentified	s__unidentified	0	0	0	0	0	0	0	0	0	0	0	0	0	0	0	0	0	0	0	0	0	0	0	0	0	0	0	0	0	0	0	0	0	0	0	0	0	0	0	0	0	0
13dca9dbe8c4135e8a476e773ba5a1fa	k__Fungi	p__unidentified	c__unidentified	o__unidentified	f__unidentified	g__unidentified	s__unidentified	0	0	0	0	0	0	0	0	0	0	0	0	0	0	0	0	0	0	0	0	0	0	0	0	0	0	0	0	0	0	0	0	0	0	0	0	0	0	0	0	0	0
13e02be39a5b69163e495353cfcb9f81	k__Fungi	p__unidentified	c__unidentified	o__unidentified	f__unidentified	g__unidentified	s__unidentified	0	0	0	0	0	0	0	0	0	0	0	0	0	0	0	0	0	0	0	0	0	0	0	0	0	0	0	5	0	0	0	0	0	0	0	0	0	0	0	0	0	0
13e4c0475827bccb718ca078f46a5cb7	k__Fungi	p__unidentified	c__unidentified	o__unidentified	f__unidentified	g__unidentified	s__unidentified	0	0	0	0	0	0	0	0	0	0	0	0	9	0	0	0	0	0	0	0	0	0	0	0	0	0	0	0	0	0	0	0	0	0	0	0	0	0	0	0	0	0
13e50923ec79f1ea1382f5dcd0920f5f	k__Fungi	p__unidentified	c__unidentified	o__unidentified	f__unidentified	g__unidentified	s__unidentified	0	0	0	0	0	0	0	0	0	0	0	0	0	0	0	0	0	0	0	0	0	0	0	0	0	0	0	0	0	0	0	0	0	0	0	0	0	0	0	0	0	0
13e59a011e0ddb23ec7f0166287574a2	k__Fungi	p__unidentified	c__unidentified	o__unidentified	f__unidentified	g__unidentified	s__unidentified	0	0	0	0	0	0	0	0	0	0	0	0	0	0	0	0	0	0	0	0	0	0	0	0	0	0	0	0	0	0	0	0	0	0	0	0	0	0	0	0	0	0
13eaaee13469b940c90e1e50093a24d8	k__Fungi	p__unidentified	c__unidentified	o__unidentified	f__unidentified	g__unidentified	s__unidentified	0	0	0	0	0	0	0	0	0	0	0	0	0	0	0	0	0	0	0	0	0	0	0	0	0	0	0	0	0	0	0	0	0	0	0	0	0	0	0	0	0	0
13faf77dbde30673a8c59c54e03e962f	k__Fungi	p__Ascomycota	c__Sordariomycetes	o__Hypocreales	f__Nectriaceae	g__Fusarium	s__unidentified	0	0	0	0	0	0	0	0	0	0	0	0	0	0	0	0	0	0	0	0	0	0	0	0	0	0	0	0	0	0	0	0	0	0	0	0	0	0	0	0	0	0
13fbbc3a862f17ada47b3943d916353e	k__Fungi	p__unidentified	c__unidentified	o__unidentified	f__unidentified	g__unidentified	s__unidentified	19	0	0	0	0	0	7	59	0	0	0	0	9	0	0	0	0	0	0	0	0	0	0	0	0	0	0	0	0	0	0	0	0	0	0	0	0	0	0	0	0	0
13fcd8f003ec3711b5a93983abb9b66c	k__Fungi	p__unidentified	c__unidentified	o__unidentified	f__unidentified	g__unidentified	s__unidentified	0	0	0	0	0	0	0	0	0	0	0	0	0	0	0	0	0	0	0	0	0	0	51	0	0	0	0	0	0	0	0	0	0	0	0	0	0	0	0	0	0	0
14007545562ebccbedf9ee58366ca1db	k__Fungi	p__unidentified	c__unidentified	o__unidentified	f__unidentified	g__unidentified	s__unidentified	0	0	0	0	0	0	0	0	0	0	0	0	0	0	0	0	0	0	0	0	0	0	0	0	0	0	0	0	0	13	0	0	0	978	0	0	0	0	0	0	0	0
1405d5156fb4e990ef106f118c05bdce	k__Fungi	p__unidentified	c__unidentified	o__unidentified	f__unidentified	g__unidentified	s__unidentified	0	0	0	0	0	0	0	0	0	0	0	0	0	0	0	0	0	0	0	0	0	0	0	0	0	0	0	0	0	0	0	0	0	0	0	0	0	0	0	0	0	0
1407de1ae588d12d815d9b076ab5c793	k__Fungi	p__Ascomycota	c__Dothideomycetes	o__Capnodiales	f__Cladosporiaceae	g__Cladosporium	s__Cladosporium_cladosporioides	0	0	0	0	0	0	0	0	0	0	0	0	0	0	0	0	0	0	0	0	0	0	0	0	0	0	0	0	0	0	0	0	0	0	0	0	0	0	0	0	0	0
140e0f293c7998e1023f259ba64651cd	k__Fungi	p__Ascomycota	c__Dothideomycetes	o__Pleosporales	f__Pleosporaceae	g__Curvularia	s__Curvularia_intermedia	0	0	0	0	0	0	0	0	0	0	0	0	0	0	0	0	0	0	0	0	0	0	0	0	0	0	0	0	0	0	0	0	0	0	0	0	0	0	0	0	0	0
1412ff8b0528fc56d2c794798b6a6b46	k__Fungi	p__unidentified	c__unidentified	o__unidentified	f__unidentified	g__unidentified	s__unidentified	0	0	0	0	0	0	0	0	0	0	0	0	0	0	0	0	0	0	0	0	0	0	0	0	0	0	0	0	0	0	0	0	0	0	0	0	0	0	0	0	0	0
14169c8b08917e0c8c6c1d5153dd915f	k__Fungi	p__unidentified	c__unidentified	o__unidentified	f__unidentified	g__unidentified	s__unidentified	0	3	0	0	0	0	0	0	0	0	0	0	0	0	0	0	0	0	0	0	0	0	0	0	0	0	0	0	0	0	0	0	0	0	0	0	0	0	0	0	0	0
142124de894c95fb2bbd14ee87b76ba6	k__Fungi	p__unidentified	c__unidentified	o__unidentified	f__unidentified	g__unidentified	s__unidentified	0	0	0	0	0	0	0	0	0	0	0	0	0	0	0	0	0	0	0	0	0	0	0	0	0	0	0	0	0	0	0	0	0	0	0	0	0	0	0	0	0	0
1429a9a9b5c40bf866912f1363bb4285	k__Fungi	p__unidentified	c__unidentified	o__unidentified	f__unidentified	g__unidentified	s__unidentified	0	0	0	0	0	0	0	0	0	0	0	0	0	0	0	0	0	0	0	0	0	0	0	0	0	0	0	0	0	0	0	0	0	0	0	0	0	0	0	0	0	0
143e3039d32ad7ac158e542a3bdb8911	k__Fungi	p__unidentified	c__unidentified	o__unidentified	f__unidentified	g__unidentified	s__unidentified	0	0	0	0	0	0	0	0	0	0	0	0	0	0	0	0	0	0	0	0	0	0	0	0	0	0	0	0	0	0	0	0	0	0	0	0	0	0	0	0	0	0
1445d1a64ad98331262208af6b27724d	k__Fungi	p__unidentified	c__unidentified	o__unidentified	f__unidentified	g__unidentified	s__unidentified	0	0	0	35	0	0	0	0	0	0	135	0	0	0	0	0	0	0	0	0	0	0	0	0	0	0	0	0	0	0	0	0	0	0	0	0	0	0	0	0	0	0
14468f27dc0767290f42125d0b9c3c34	k__Fungi	p__Basidiomycota	c__Microbotryomycetes	o__Leucosporidiales	f__Leucosporidiaceae	g__Leucosporidium	s__Leucosporidium_fragarium	0	0	0	0	0	0	0	0	0	0	0	0	0	0	0	0	0	0	0	0	0	0	0	0	0	0	0	0	0	0	0	0	0	0	0	0	0	0	0	0	0	0
144a94240fbfe31d907ebaa56010270f	k__Fungi	p__unidentified	c__unidentified	o__unidentified	f__unidentified	g__unidentified	s__unidentified	0	0	0	0	0	0	0	0	0	0	0	0	0	0	0	0	0	0	0	0	0	0	0	0	0	0	0	0	0	0	0	0	0	0	0	0	0	0	0	0	0	0
144d1fdf5e1193f6fc63bc197fc8ed6c	k__Fungi	p__unidentified	c__unidentified	o__unidentified	f__unidentified	g__unidentified	s__unidentified	0	0	0	0	0	0	0	0	0	0	8	0	0	0	0	0	0	0	0	0	0	0	0	0	0	0	0	0	0	0	0	0	0	0	0	0	0	0	0	0	0	0
1450337f0dbb49a1fdf9675dd2a2675f	k__Fungi	p__unidentified	c__unidentified	o__unidentified	f__unidentified	g__unidentified	s__unidentified	0	0	0	0	0	0	0	0	0	0	0	0	0	0	0	0	0	0	0	0	0	0	0	0	0	0	0	0	0	0	0	0	0	0	0	0	0	0	0	0	0	0
145165f98917081f9c9164d977e90e18	k__Fungi	p__Ascomycota	c__Leotiomycetes	o__Helotiales	f__Helotiaceae	g__Holwaya	s__Holwaya_mucida	0	0	0	0	0	0	0	0	0	0	0	0	0	0	0	0	0	0	0	0	0	0	0	0	0	0	0	0	0	0	0	0	0	0	0	0	0	0	0	0	0	0
145859b1908c33fe0ff35910c016b4ad	k__Fungi	p__unidentified	c__unidentified	o__unidentified	f__unidentified	g__unidentified	s__unidentified	0	0	0	0	0	0	0	0	0	0	0	0	0	0	0	0	0	0	0	0	0	0	0	0	0	0	0	0	0	0	0	0	0	0	0	0	0	0	0	0	0	0
145901bc735912a4bbf5e57bf85bf836	k__Fungi	p__unidentified	c__unidentified	o__unidentified	f__unidentified	g__unidentified	s__unidentified	0	28	6	0	0	0	0	0	0	0	0	0	0	0	0	0	0	0	0	0	0	0	0	0	0	0	0	0	0	0	0	0	0	0	0	0	0	0	0	0	0	0
145b9b7e518649b8295a8a4aaa53361c	k__Fungi	p__unidentified	c__unidentified	o__unidentified	f__unidentified	g__unidentified	s__unidentified	0	0	0	0	0	0	0	0	0	0	0	0	0	0	0	0	0	0	0	0	0	0	0	0	0	0	0	0	0	0	0	0	0	0	0	0	0	0	0	0	0	0
145cca6604453fbfd3cc14321c7f8528	k__Fungi	p__unidentified	c__unidentified	o__unidentified	f__unidentified	g__unidentified	s__unidentified	0	0	0	0	0	0	0	0	0	0	0	0	0	0	0	0	0	0	0	0	0	0	0	0	0	0	0	0	0	0	0	0	0	6	0	0	0	0	0	0	0	0
145d9302a8592c037acccd8b1afe4a96	k__Fungi	p__unidentified	c__unidentified	o__unidentified	f__unidentified	g__unidentified	s__unidentified	0	0	0	0	0	0	0	0	0	0	0	0	0	0	0	0	0	0	0	0	0	0	0	0	0	0	0	0	0	0	0	0	0	0	0	0	0	0	0	0	0	0
145e4d93b13c7fc394dc2add4281aca6	k__Fungi	p__unidentified	c__unidentified	o__unidentified	f__unidentified	g__unidentified	s__unidentified	0	0	0	0	0	0	0	0	0	0	0	0	0	0	0	0	0	0	0	0	0	0	0	0	0	0	0	0	0	0	0	0	0	0	0	0	0	0	0	0	0	0
146273fcff60a58faf1104324176583b	k__Fungi	p__Ascomycota	c__Sordariomycetes	o__unidentified	f__unidentified	g__unidentified	s__unidentified	0	0	0	0	0	0	0	0	0	0	0	0	0	0	0	0	0	0	0	0	0	0	0	0	0	0	0	0	0	0	0	0	0	0	0	0	0	0	0	0	0	0
14659ffbe1e261661c20c7d8fc804365	k__Fungi	p__unidentified	c__unidentified	o__unidentified	f__unidentified	g__unidentified	s__unidentified	0	0	0	0	0	0	0	0	0	0	0	0	0	0	0	0	0	0	0	0	0	0	0	0	0	0	0	0	0	0	0	0	0	0	0	0	0	0	0	0	0	0
14678c40a88ecc65a0c3eca5f77d5cf7	k__Fungi	p__unidentified	c__unidentified	o__unidentified	f__unidentified	g__unidentified	s__unidentified	0	0	0	0	0	0	0	0	0	0	0	0	0	0	0	0	0	0	0	0	0	0	0	0	0	0	0	0	0	0	0	0	0	0	0	0	0	0	0	0	0	0
14678eabbef2c72e00e23e9f0c800591	k__Fungi	p__unidentified	c__unidentified	o__unidentified	f__unidentified	g__unidentified	s__unidentified	0	0	0	0	0	0	0	0	0	0	0	0	0	0	0	0	0	0	0	0	0	0	0	0	0	0	0	0	0	0	0	0	0	0	0	0	0	0	0	0	0	0
146b8e9dbf2299ecad892c676a59d407	k__Fungi	p__unidentified	c__unidentified	o__unidentified	f__unidentified	g__unidentified	s__unidentified	0	0	0	0	0	0	0	0	0	0	0	0	0	0	0	0	0	0	0	0	0	0	0	0	0	0	0	0	0	0	0	0	0	0	0	0	0	0	0	0	0	0
1476271a91975b677d3a7858664904cd	k__Fungi	p__Ascomycota	c__Leotiomycetes	o__Thelebolales	f__Thelebolaceae	g__unidentified	s__unidentified	0	0	0	0	0	0	0	0	0	0	0	0	0	0	0	0	0	0	0	0	0	0	0	0	0	0	0	0	0	0	0	0	0	0	0	0	0	0	0	0	0	0
1484d3c89a10e095e2e5276e6175f12e	k__Fungi	p__Chytridiomycota	c__unidentified	o__unidentified	f__unidentified	g__unidentified	s__unidentified	0	0	0	0	0	0	0	0	0	0	0	0	0	0	0	0	0	0	0	0	0	0	0	0	0	0	0	0	0	0	0	0	0	0	0	0	0	0	0	0	0	0
14884707a0735dbf428b541f08d3cacb	k__Fungi	p__unidentified	c__unidentified	o__unidentified	f__unidentified	g__unidentified	s__unidentified	0	0	55	0	0	0	0	0	0	0	0	0	0	0	0	0	0	0	0	0	0	0	0	0	0	0	0	0	0	0	0	0	0	0	0	0	0	0	116	0	0	0
14890a2f1b00953dbee9cafa8c717ebd	k__Fungi	p__unidentified	c__unidentified	o__unidentified	f__unidentified	g__unidentified	s__unidentified	0	0	0	0	0	0	0	0	0	0	0	0	0	0	0	0	0	0	0	0	0	0	0	0	0	0	0	0	0	0	0	0	0	0	0	0	0	0	0	0	0	0
148c56bd70e7301f8f6d0447d737152f	k__Fungi	p__unidentified	c__unidentified	o__unidentified	f__unidentified	g__unidentified	s__unidentified	0	0	0	0	0	0	0	0	0	0	0	0	0	0	0	0	0	0	0	0	0	0	0	0	0	0	0	0	0	0	0	0	0	0	0	0	0	0	0	0	0	0
148daa7958240319794f69b7fa2a7b9c	k__Fungi	p__unidentified	c__unidentified	o__unidentified	f__unidentified	g__unidentified	s__unidentified	0	0	0	0	0	0	0	0	0	0	0	0	0	0	0	0	0	0	0	0	0	0	0	0	0	0	0	0	0	0	0	0	0	0	0	0	0	0	0	0	0	0
149173ba5f98563e7187a616f9fff945	k__Fungi	p__unidentified	c__unidentified	o__unidentified	f__unidentified	g__unidentified	s__unidentified	0	0	0	0	0	0	0	0	0	0	0	0	0	0	0	0	0	0	0	0	0	0	0	0	0	0	0	0	0	0	0	0	0	0	0	0	0	0	0	0	0	0
14975a18a2f19ac4d5a8b7aa8b914089	k__Fungi	p__Ascomycota	c__unidentified	o__unidentified	f__unidentified	g__unidentified	s__unidentified	0	0	0	26	0	0	0	0	0	0	0	0	0	0	0	0	0	0	0	0	0	0	0	0	0	0	0	0	0	0	0	0	0	0	0	0	0	0	0	0	0	0
1497867f2812194aada74ab636076874	k__Fungi	p__Ascomycota	c__Sordariomycetes	o__Hypocreales	f__Nectriaceae	g__Xenoacremonium	s__Xenoacremonium_falcatum	0	0	0	98	0	0	0	0	0	0	0	0	0	0	0	0	0	0	0	0	0	0	0	0	0	0	0	0	0	6	0	0	0	0	0	0	0	0	0	0	0	0
149d35c21418fa93876d1e0d3437349e	k__Fungi	p__unidentified	c__unidentified	o__unidentified	f__unidentified	g__unidentified	s__unidentified	0	0	0	0	0	0	0	0	0	0	0	0	0	0	0	0	0	0	0	0	8	0	0	0	0	0	0	0	0	0	0	0	0	0	0	0	0	0	0	0	0	0
14a3095abc17270ce0c6ebb39a753a8a	k__Fungi	p__unidentified	c__unidentified	o__unidentified	f__unidentified	g__unidentified	s__unidentified	0	0	0	0	0	0	0	0	0	0	0	0	0	0	0	0	0	0	0	0	0	0	0	0	0	0	0	0	0	0	0	0	0	0	0	0	0	0	0	0	0	0
14a6aa8ec3eae41330f35a5005c97633	k__Fungi	p__Ascomycota	c__Sordariomycetes	o__Hypocreales	f__Nectriaceae	g__Xenoacremonium	s__Xenoacremonium_falcatum	0	0	0	0	0	0	0	0	0	0	0	0	0	0	0	0	0	0	0	0	0	0	0	0	0	0	0	0	0	0	0	0	0	0	0	0	0	0	0	0	0	0
14a9faad2c2f27f49bd7dda615ad404f	k__Fungi	p__Chytridiomycota	c__unidentified	o__unidentified	f__unidentified	g__unidentified	s__unidentified	0	0	0	0	0	0	0	0	0	0	0	0	0	0	0	0	0	0	0	0	0	0	0	0	0	0	0	0	0	0	0	0	0	0	0	0	0	0	0	0	0	0
14aad6a9281068fe4119f5dd5888b992	k__Fungi	p__unidentified	c__unidentified	o__unidentified	f__unidentified	g__unidentified	s__unidentified	0	0	0	0	0	0	0	0	0	0	0	0	0	0	0	0	0	0	0	0	0	0	0	0	0	0	0	0	0	0	0	0	0	0	0	0	0	0	0	0	0	0
14af15a974190b78666d6a6e8035550e	k__Fungi	p__unidentified	c__unidentified	o__unidentified	f__unidentified	g__unidentified	s__unidentified	0	0	0	0	0	0	0	0	0	0	0	0	0	0	0	0	0	0	0	0	0	0	0	0	0	0	0	0	0	0	0	0	0	0	0	0	0	0	0	0	0	0
14af4469b82e47fdd3e8e450c21b7aba	k__Fungi	p__unidentified	c__unidentified	o__unidentified	f__unidentified	g__unidentified	s__unidentified	0	0	0	0	0	0	0	0	0	0	0	0	0	0	0	0	0	0	0	0	0	0	0	0	0	0	0	0	0	0	0	0	0	0	0	0	0	0	0	0	0	0
14b03ef86b96a6ef0059c26a96b452db	k__Fungi	p__unidentified	c__unidentified	o__unidentified	f__unidentified	g__unidentified	s__unidentified	0	0	0	0	0	0	0	0	0	0	0	0	0	0	0	0	0	0	0	0	0	0	0	0	0	0	0	0	0	0	0	0	0	0	0	0	0	0	4	0	0	0
14b0d54eb85f8b6de751a63c2b257f12	k__Fungi	p__Monoblepharomycota	c__Monoblepharidomycetes	o__Monoblepharidales	f__unidentified	g__unidentified	s__unidentified	0	0	0	0	0	0	0	0	0	0	0	0	0	0	0	0	0	0	0	0	0	0	0	0	0	0	0	0	0	0	0	0	0	0	0	0	0	0	0	0	0	0
14b4a20c56b3d32a948aa72ec8fde417	k__Fungi	p__Basidiomycota	c__Tremellomycetes	o__Filobasidiales	f__Filobasidiaceae	g__Heterocephalacria	s__unidentified	0	0	0	0	0	0	0	0	0	0	0	0	0	0	0	0	0	0	0	0	0	0	0	0	0	0	0	0	0	0	0	0	0	0	0	0	0	0	0	0	0	0
14b9551420d9caf3ee9feabc7bd1eba2	k__Fungi	p__unidentified	c__unidentified	o__unidentified	f__unidentified	g__unidentified	s__unidentified	0	0	0	0	0	0	0	0	0	0	0	0	0	0	0	0	0	0	0	0	0	0	0	0	0	0	0	0	0	0	0	0	0	0	0	0	0	0	0	0	0	0
14bf92d0b998ca69a239139d13ad035a	k__Fungi	p__Ascomycota	c__Dothideomycetes	o__Capnodiales	f__unidentified	g__unidentified	s__unidentified	0	0	0	0	0	0	0	0	0	0	0	0	0	0	0	0	0	0	0	0	0	0	0	0	0	0	0	0	0	0	0	0	0	0	0	0	0	0	0	0	0	0
14c5b35983529fcb396587e7e15a55f4	k__Fungi	p__unidentified	c__unidentified	o__unidentified	f__unidentified	g__unidentified	s__unidentified	10	0	0	0	0	0	71	88	0	5	0	0	74	0	0	0	0	0	0	0	0	0	0	0	0	0	0	0	0	0	21	0	0	0	0	0	0	0	0	0	0	0
14d1a153e97a9c65844bcd257e1e5e9b	k__Fungi	p__unidentified	c__unidentified	o__unidentified	f__unidentified	g__unidentified	s__unidentified	0	0	0	0	0	0	0	0	0	0	0	0	0	0	0	0	0	0	0	0	0	0	0	0	0	0	0	0	0	0	0	0	0	0	0	0	0	0	0	0	0	0
14d42e3b621e2148639d310bfab08f8e	k__Fungi	p__unidentified	c__unidentified	o__unidentified	f__unidentified	g__unidentified	s__unidentified	0	0	0	0	0	0	4	0	0	0	0	0	0	0	0	0	0	0	0	0	0	0	0	0	0	0	0	0	0	0	0	0	0	0	0	0	0	0	0	0	0	0
14d57883dda06540220bcb809d88a80e	k__Fungi	p__unidentified	c__unidentified	o__unidentified	f__unidentified	g__unidentified	s__unidentified	0	0	0	0	0	0	0	0	0	0	0	0	0	0	0	0	0	0	0	0	0	0	0	0	0	0	0	0	0	0	0	0	0	0	0	0	0	0	0	0	0	0
14e16856c337661a0237a9c97da72c92	k__Fungi	p__unidentified	c__unidentified	o__unidentified	f__unidentified	g__unidentified	s__unidentified	0	0	0	0	0	0	0	0	33	0	0	0	0	0	0	0	0	0	0	0	0	0	0	0	0	0	0	0	0	0	0	0	0	0	0	0	252	0	0	0	15	0
14e206bc41120d2f20e379b80a0e8ddb	k__Fungi	p__Chytridiomycota	c__Rhizophydiomycetes	o__Rhizophydiales	f__unidentified	g__unidentified	s__unidentified	0	0	0	0	0	0	0	0	0	0	0	0	0	0	33	0	0	0	0	0	0	0	0	0	0	0	0	0	0	0	0	0	0	0	0	0	0	0	0	0	0	0
14eb3e97172f6323671eb6c8fa268af3	k__Fungi	p__unidentified	c__unidentified	o__unidentified	f__unidentified	g__unidentified	s__unidentified	0	0	0	0	0	0	0	0	0	0	0	0	0	0	0	0	0	0	0	0	0	0	0	0	0	0	0	0	0	0	0	0	0	0	0	0	0	0	0	0	0	0
14ebed26a80f43015789dbf4677a5e57	k__Fungi	p__unidentified	c__unidentified	o__unidentified	f__unidentified	g__unidentified	s__unidentified	0	0	0	0	0	0	0	0	0	0	0	0	0	0	0	0	0	0	0	0	0	0	0	0	0	0	0	0	0	0	3	0	0	0	0	0	0	0	0	0	0	0
14ec07c6363b9d379192f0b5f8c722ae	k__Fungi	p__unidentified	c__unidentified	o__unidentified	f__unidentified	g__unidentified	s__unidentified	0	0	0	0	0	0	0	0	0	0	0	0	0	0	0	0	0	0	0	0	0	0	0	0	0	0	0	10	0	0	0	0	0	0	0	0	0	0	0	0	0	0
14f4fce47a4082aa0816ddbc628e7f87	k__Fungi	p__Chytridiomycota	c__unidentified	o__unidentified	f__unidentified	g__unidentified	s__unidentified	0	0	0	0	0	0	0	0	0	0	0	0	0	0	0	0	0	0	0	0	0	0	0	0	0	0	0	0	0	0	0	0	0	0	0	0	0	0	0	0	0	0
14fb29f47b7cf43f86f0c3ecffa2bd07	k__Fungi	p__Ascomycota	c__Leotiomycetes	o__Thelebolales	f__Thelebolaceae	g__unidentified	s__unidentified	0	0	0	0	0	0	0	0	0	0	0	0	0	0	0	0	0	0	0	0	0	0	0	0	0	0	0	0	0	0	0	0	0	0	0	0	0	0	0	0	0	0
1503c27b5a79f29af4d419ba8c51a4aa	k__Fungi	p__unidentified	c__unidentified	o__unidentified	f__unidentified	g__unidentified	s__unidentified	0	0	0	0	0	0	0	0	0	0	0	0	0	0	0	0	0	0	0	0	0	0	0	0	0	0	0	0	0	0	0	0	0	0	0	0	0	0	0	0	0	0
150733b749de8de770d469e7329882fd	k__Fungi	p__unidentified	c__unidentified	o__unidentified	f__unidentified	g__unidentified	s__unidentified	0	0	0	0	0	0	0	0	0	0	0	0	0	0	0	0	0	0	0	0	0	0	0	0	0	0	0	0	0	0	0	0	0	0	0	0	0	0	0	0	0	0
1508516ea2d8b0c0fc6fb5fbe337e840	k__Fungi	p__unidentified	c__unidentified	o__unidentified	f__unidentified	g__unidentified	s__unidentified	0	0	0	0	0	0	0	0	0	0	0	0	0	0	0	0	0	0	0	0	0	0	0	0	0	0	0	0	0	0	0	0	0	0	0	0	0	0	0	0	0	0
150a4c3fa11d718490d0e770f9cc12c2	k__Fungi	p__unidentified	c__unidentified	o__unidentified	f__unidentified	g__unidentified	s__unidentified	0	0	0	0	0	0	0	0	0	0	0	0	0	0	0	0	0	0	0	8	0	0	0	0	0	0	0	0	0	0	0	0	0	0	0	0	0	0	0	0	0	0
151e4d5076e90ac5f64af6ebec54c818	k__Fungi	p__unidentified	c__unidentified	o__unidentified	f__unidentified	g__unidentified	s__unidentified	0	0	0	0	0	0	0	0	0	0	0	0	0	0	0	0	0	0	0	0	0	0	0	0	0	0	0	0	0	0	0	0	0	0	0	0	0	0	0	0	0	0
152257907db9bf02f9462298570fd144	k__Fungi	p__unidentified	c__unidentified	o__unidentified	f__unidentified	g__unidentified	s__unidentified	0	0	0	0	0	0	0	0	0	0	0	0	0	0	0	0	0	0	0	0	0	0	0	0	0	0	0	0	0	0	0	0	0	0	0	0	0	0	0	0	0	0
152d167ebc755a6c0023f29ff1a02e04	k__Fungi	p__unidentified	c__unidentified	o__unidentified	f__unidentified	g__unidentified	s__unidentified	0	0	0	0	0	0	0	0	0	0	0	0	0	0	0	0	0	0	0	0	0	0	0	0	0	0	0	0	0	0	0	0	0	0	0	0	0	0	0	0	0	0
152d9e38e1ec0cd2fe26612ab6831bd3	k__Fungi	p__unidentified	c__unidentified	o__unidentified	f__unidentified	g__unidentified	s__unidentified	0	0	0	0	0	0	0	0	0	0	0	0	11	0	0	0	0	0	0	0	0	0	0	0	0	0	0	0	0	0	0	0	0	0	0	0	0	0	0	0	0	0
152dc6e3d41c1527750a4ce111fc18f9	k__Fungi	p__Ascomycota	c__Leotiomycetes	o__Helotiales	f__Helotiales_fam_Incertae_sedis	g__Leohumicola	s__unidentified	0	0	0	0	0	0	0	0	0	0	0	0	0	0	0	0	0	0	0	0	0	0	0	0	0	0	0	0	0	0	0	0	0	0	0	0	0	0	0	0	0	0
153262b7611c4d29878512c78f3ec6cc	k__Fungi	p__Ascomycota	c__Leotiomycetes	o__Helotiales	f__Helotiaceae	g__Holwaya	s__Holwaya_mucida	0	0	0	0	0	0	0	0	0	0	0	0	0	0	0	0	0	0	0	0	0	0	0	0	0	0	0	0	0	0	0	0	0	0	0	0	0	0	0	0	0	0
1533f2ecf4d0881348073219cca38e40	k__Fungi	p__unidentified	c__unidentified	o__unidentified	f__unidentified	g__unidentified	s__unidentified	0	0	0	0	0	0	0	0	0	0	0	0	0	0	0	0	0	0	0	0	0	0	0	0	0	0	0	0	0	0	0	0	0	0	0	0	0	0	0	0	0	0
15358591944c6a5303b80993a01d0e00	k__Fungi	p__Basidiomycota	c__Tremellomycetes	o__Filobasidiales	f__Filobasidiaceae	g__Naganishia	s__Naganishia_albida	0	0	0	0	0	0	0	0	0	0	0	0	0	0	0	0	0	0	0	0	0	0	0	0	0	0	0	0	0	0	0	0	0	0	0	0	0	0	0	0	0	0
153c02c2e7875692d469f06ff7df2411	k__Fungi	p__Ascomycota	c__Eurotiomycetes	o__Verrucariales	f__Verrucariaceae	g__Verrucaria	s__unidentified	0	0	0	0	0	0	0	0	0	0	0	0	0	0	0	0	0	0	0	0	0	0	0	0	0	0	0	0	0	0	0	0	0	0	0	0	0	0	0	0	0	0
153d007fcadee16539ad129ff72a3fe3	k__Fungi	p__unidentified	c__unidentified	o__unidentified	f__unidentified	g__unidentified	s__unidentified	0	0	0	0	0	0	0	0	0	0	0	0	0	0	0	0	0	0	0	0	0	0	0	0	0	0	0	0	0	0	0	0	0	0	0	0	0	0	0	0	0	0
153ebbd70aad51ab137b377e8f65d305	k__Fungi	p__Rozellomycota	c__Rozellomycotina_cls_Incertae_sedis	o__GS08	f__unidentified	g__unidentified	s__unidentified	0	0	0	0	0	0	0	0	0	0	0	0	0	0	0	0	0	0	0	0	0	0	0	0	0	0	0	0	0	0	0	0	0	0	0	0	0	0	0	0	0	0
153f8ef26559d72c04ed6b8cb7684c9a	k__Fungi	p__unidentified	c__unidentified	o__unidentified	f__unidentified	g__unidentified	s__unidentified	0	0	0	0	0	0	0	0	0	0	0	0	0	0	0	0	0	0	0	0	0	0	0	0	0	0	0	0	0	0	0	0	0	0	0	0	0	0	0	0	0	0
154420d67b99db979bbbe74157a7ce55	k__Fungi	p__unidentified	c__unidentified	o__unidentified	f__unidentified	g__unidentified	s__unidentified	0	0	0	0	0	0	0	0	0	0	0	0	0	0	0	0	0	0	0	0	0	0	0	0	0	0	0	0	0	0	0	0	0	0	0	0	0	0	0	0	0	0
154ac23314ffd2894de7d8410287d6f9	k__Fungi	p__Ascomycota	c__unidentified	o__unidentified	f__unidentified	g__unidentified	s__unidentified	0	0	0	0	0	0	0	0	0	0	0	0	0	0	0	0	0	0	0	0	0	0	0	0	0	0	0	0	0	0	0	0	0	0	0	0	0	0	0	0	0	0
1551e9769ec2dd39690bf9731a556383	k__Fungi	p__Ascomycota	c__Leotiomycetes	o__Helotiales	f__Hyaloscyphaceae	g__Lachnellula	s__Lachnellula_fuscosanguinea	0	0	0	0	0	0	0	0	0	0	0	0	0	0	0	0	0	0	0	0	0	0	0	0	0	0	0	0	0	0	0	0	0	0	0	0	0	0	0	0	0	0
15530664318b7b2ac9508e1a240faddd	k__Fungi	p__Ascomycota	c__Leotiomycetes	o__Helotiales	f__Hyaloscyphaceae	g__Calycina	s__unidentified	0	0	0	0	0	0	0	0	0	0	0	0	0	0	0	0	0	0	0	0	0	0	0	0	0	0	0	0	0	0	0	0	0	0	0	0	0	0	0	0	0	0
15563899162689c23fe76b19e4fb9825	k__Fungi	p__Ascomycota	c__Sordariomycetes	o__Sordariales	f__Lasiosphaeriaceae	g__Schizothecium	s__unidentified	0	0	0	0	0	0	0	0	0	0	0	0	0	0	0	0	0	0	0	0	0	0	0	0	0	0	0	0	0	0	0	0	0	0	0	0	0	0	0	0	0	0
155940601e70a65254205fb9b240ff40	k__Fungi	p__unidentified	c__unidentified	o__unidentified	f__unidentified	g__unidentified	s__unidentified	0	0	0	0	0	0	0	0	0	0	0	0	0	0	0	0	0	0	0	0	0	0	0	0	0	0	0	0	0	0	0	0	0	0	0	0	0	0	0	0	0	0
155bf459a1cbf8915ccc137cd78b48b7	k__Fungi	p__Ascomycota	c__Dothideomycetes	o__Capnodiales	f__Mycosphaerellaceae	g__Zymoseptoria	s__unidentified	0	0	0	0	0	0	8	0	0	0	0	0	0	0	0	0	0	0	0	0	0	0	0	0	0	0	0	0	0	0	0	0	0	0	0	0	0	0	0	0	0	0
15617c36f5c51ab490b462ca8e9d282c	k__Fungi	p__Chytridiomycota	c__unidentified	o__unidentified	f__unidentified	g__unidentified	s__unidentified	0	0	0	0	0	0	0	0	0	0	0	0	0	0	0	0	0	0	0	0	0	0	0	0	0	0	0	0	0	0	0	0	0	0	0	0	0	0	0	0	0	0
15631524bcea5d324752dc22b4f2adad	k__Fungi	p__Chytridiomycota	c__unidentified	o__unidentified	f__unidentified	g__unidentified	s__unidentified	0	0	0	0	0	0	0	0	0	0	0	0	0	0	0	0	0	0	0	0	0	0	0	0	0	0	0	0	0	0	0	0	0	0	0	0	0	0	0	0	0	0
1563c021b4c1aa8b620b1850b643af67	k__Fungi	p__unidentified	c__unidentified	o__unidentified	f__unidentified	g__unidentified	s__unidentified	0	0	0	0	0	0	0	0	0	0	0	0	0	0	0	0	0	0	0	0	0	0	0	0	0	0	0	0	0	0	0	0	0	0	0	0	0	0	0	0	0	0
1564b6bac53851b3d8f4a4597b1dd7b3	k__Fungi	p__unidentified	c__unidentified	o__unidentified	f__unidentified	g__unidentified	s__unidentified	0	0	0	0	0	0	0	0	0	0	0	0	0	0	0	0	0	0	0	0	0	0	0	0	0	0	0	0	0	0	0	0	0	0	0	0	0	0	0	0	0	0
1565c3bdf4b287c115e4b8e6563caea7	k__Fungi	p__unidentified	c__unidentified	o__unidentified	f__unidentified	g__unidentified	s__unidentified	0	0	0	0	0	0	0	0	0	0	0	0	0	0	0	0	0	0	0	0	0	0	0	0	0	0	0	0	0	0	0	0	0	0	0	0	0	0	0	0	0	0
15675e4eed7272799111a566e57c20fe	k__Fungi	p__unidentified	c__unidentified	o__unidentified	f__unidentified	g__unidentified	s__unidentified	0	0	0	0	0	0	0	0	0	0	0	0	0	0	0	0	0	0	0	0	0	0	0	0	0	0	0	0	0	0	0	0	0	0	0	0	0	0	0	0	0	0
156f54ad85de384c80e5395de8db7cbc	k__Fungi	p__unidentified	c__unidentified	o__unidentified	f__unidentified	g__unidentified	s__unidentified	0	0	0	0	0	0	0	0	0	0	0	0	0	0	0	0	0	0	0	0	0	0	0	0	0	0	0	0	0	0	0	0	0	0	0	0	0	0	0	0	0	0
156ffeb220d9029be784ec94d89c62a0	k__Fungi	p__unidentified	c__unidentified	o__unidentified	f__unidentified	g__unidentified	s__unidentified	0	0	0	0	0	0	0	0	0	0	0	0	0	0	0	0	0	0	0	0	0	0	0	0	0	0	0	0	0	0	0	0	0	0	0	0	0	0	0	0	0	0
157891f4f13035c9f07e5018ee67f080	k__Fungi	p__unidentified	c__unidentified	o__unidentified	f__unidentified	g__unidentified	s__unidentified	0	0	0	0	0	0	0	0	0	0	0	0	0	0	0	0	0	0	0	0	0	0	0	0	0	0	0	0	0	0	0	0	0	0	0	0	0	0	0	0	0	0
157a06ad9b0b84c3daa37ea4a9105655	k__Fungi	p__unidentified	c__unidentified	o__unidentified	f__unidentified	g__unidentified	s__unidentified	0	0	0	0	0	0	0	0	0	0	0	0	0	0	0	0	0	0	0	0	0	0	0	0	0	0	0	0	0	0	0	0	0	0	0	0	0	0	0	0	0	0
1581b58cdebdedba4d676bdfa4e17e6e	k__Fungi	p__unidentified	c__unidentified	o__unidentified	f__unidentified	g__unidentified	s__unidentified	0	0	0	0	0	0	0	0	0	0	0	0	0	0	13	0	0	0	0	0	0	0	0	0	0	0	0	0	0	0	0	0	0	0	0	0	0	0	0	0	0	0
158653ac7cca29c7c1131b6bbffb298e	k__Fungi	p__Ascomycota	c__Dothideomycetes	o__Pleosporales	f__Phaeosphaeriaceae	g__Juncaceicola	s__unidentified	0	0	0	0	0	0	0	0	0	0	0	0	0	0	0	0	0	0	0	0	0	0	0	0	0	0	0	0	0	0	0	0	0	0	0	0	0	0	0	0	0	0
158e9ae6c6cc223917ca3281aab588e8	k__Fungi	p__unidentified	c__unidentified	o__unidentified	f__unidentified	g__unidentified	s__unidentified	0	0	0	6	0	0	0	0	0	0	0	0	0	0	0	0	0	0	0	0	0	0	0	0	0	0	0	0	0	0	0	0	0	0	0	0	0	0	0	0	0	0
159187f8a3732fb5eb7e8c7d2db9a911	k__Fungi	p__unidentified	c__unidentified	o__unidentified	f__unidentified	g__unidentified	s__unidentified	0	0	0	0	0	0	0	0	0	0	0	0	0	0	0	0	0	0	0	0	0	0	0	0	0	0	0	0	0	0	0	0	0	0	0	0	0	0	0	0	0	0
1592c9da2c8a2bcf5600ba12f91a623d	k__Fungi	p__unidentified	c__unidentified	o__unidentified	f__unidentified	g__unidentified	s__unidentified	0	0	0	0	0	0	0	0	0	0	0	0	0	0	0	0	0	0	0	0	0	0	0	0	0	0	0	0	0	0	0	0	0	0	0	0	0	0	0	0	0	0
15953d36db4a62ac2d468f5ff088cbea	k__Fungi	p__Ascomycota	c__Sordariomycetes	o__Microascales	f__Microascaceae	g__Kernia	s__Kernia_columnaris	0	0	0	0	0	0	0	0	0	0	0	0	0	0	0	0	0	0	0	0	0	0	0	0	0	0	0	0	0	0	0	0	0	0	0	0	0	0	0	0	0	0
1597ad41b3a7d86d179d0bd10b54963b	k__Fungi	p__unidentified	c__unidentified	o__unidentified	f__unidentified	g__unidentified	s__unidentified	0	0	0	0	0	0	0	0	0	0	0	0	0	0	0	0	0	0	0	0	0	0	0	0	0	0	0	0	0	0	0	0	0	0	0	0	0	0	0	0	0	0
1598897a2d7e444cce88915701e2e8c7	k__Fungi	p__Ascomycota	c__unidentified	o__unidentified	f__unidentified	g__unidentified	s__unidentified	0	11	294	0	0	0	0	0	0	0	0	0	0	0	0	0	0	0	0	0	0	0	0	0	0	0	0	0	0	0	0	0	0	0	0	0	0	0	0	0	0	0
159becb0bdc07d51846507be3455c472	k__Fungi	p__unidentified	c__unidentified	o__unidentified	f__unidentified	g__unidentified	s__unidentified	0	0	0	0	0	0	0	0	67	0	0	0	0	0	0	0	0	0	0	0	0	0	0	0	0	0	0	0	0	0	0	0	0	0	0	0	0	0	0	0	0	0
15a42afc97505f40a58a5b6ff2d11008	k__Fungi	p__unidentified	c__unidentified	o__unidentified	f__unidentified	g__unidentified	s__unidentified	0	0	0	0	0	0	0	0	0	0	0	0	0	0	0	0	0	0	0	0	0	0	0	0	0	0	0	0	0	0	0	0	0	0	0	0	0	0	0	0	0	0
15a712b022a57c2c1b3e313ecc06bc57	k__Fungi	p__Chytridiomycota	c__unidentified	o__unidentified	f__unidentified	g__unidentified	s__unidentified	0	0	0	0	0	0	0	0	0	0	0	0	0	0	0	0	0	0	0	0	0	0	0	0	0	0	0	0	0	0	0	0	0	0	0	0	0	0	0	0	0	0
15a7fe76c0aef9cfec1736ede90d4b07	k__Fungi	p__Ascomycota	c__Eurotiomycetes	o__Chaetothyriales	f__unidentified	g__unidentified	s__unidentified	0	0	0	0	0	0	0	0	0	0	0	0	0	0	0	0	0	0	0	0	0	0	0	0	0	0	0	0	0	0	0	0	0	0	0	0	0	0	0	0	0	0
15a9161a23e4aca17e428c3a367a8bdf	k__Fungi	p__unidentified	c__unidentified	o__unidentified	f__unidentified	g__unidentified	s__unidentified	0	0	0	0	0	0	0	0	0	0	0	0	0	0	0	0	0	0	0	0	0	0	0	0	0	0	0	0	0	0	0	0	0	0	0	0	0	0	0	0	0	0
15aad570921fd1a3438e5c899ab3c42e	k__Fungi	p__unidentified	c__unidentified	o__unidentified	f__unidentified	g__unidentified	s__unidentified	0	0	0	0	0	0	0	0	0	0	0	0	0	0	0	0	0	0	0	0	0	0	0	0	0	0	0	0	0	0	0	0	0	0	0	0	0	0	0	0	0	0
15abc6fd37e8bfc3752a5891f80f53f9	k__Fungi	p__Rozellomycota	c__unidentified	o__unidentified	f__unidentified	g__unidentified	s__unidentified	0	0	0	0	0	0	0	0	0	0	0	0	0	0	0	0	0	0	0	0	0	0	0	0	0	0	0	0	0	0	0	0	0	0	0	0	0	0	0	0	0	0
15ac9bcbb0c598a42a552f08aef2f7f2	k__Fungi	p__unidentified	c__unidentified	o__unidentified	f__unidentified	g__unidentified	s__unidentified	0	0	0	0	0	0	0	0	0	0	0	0	0	0	0	0	0	0	0	0	0	0	0	0	0	0	0	0	0	0	0	0	0	0	0	0	0	0	0	0	0	0
15acddec6da6d3fce42f98e0257c5d63	k__Fungi	p__unidentified	c__unidentified	o__unidentified	f__unidentified	g__unidentified	s__unidentified	0	0	0	0	0	0	0	0	0	0	0	0	0	0	0	0	0	0	0	0	0	0	0	0	0	0	0	0	0	0	0	0	0	22	0	0	0	0	0	0	0	0
15ad5e394e4093de9e3e52ee4475f0d6	k__Fungi	p__Ascomycota	c__Sordariomycetes	o__Chaetosphaeriales	f__Chaetosphaeriaceae	g__Chaetosphaeria	s__unidentified	0	0	0	0	0	0	0	0	0	0	0	0	0	0	0	0	0	0	0	0	0	0	0	0	0	0	0	0	0	0	0	0	0	0	0	0	0	0	0	0	0	0
15ae3520a81848a3fb6bd1b5434cdce5	k__Fungi	p__Ascomycota	c__Leotiomycetes	o__Helotiales	f__Chaetomellaceae	g__Pilidium	s__unidentified	0	0	0	0	0	0	0	0	0	0	0	0	0	0	0	0	0	0	0	0	0	0	0	0	0	0	0	0	0	0	0	0	0	0	0	0	0	0	0	0	0	0
15b08a8b9d7324de84cf9e3ecc5e0fdd	k__Fungi	p__unidentified	c__unidentified	o__unidentified	f__unidentified	g__unidentified	s__unidentified	0	0	0	0	0	0	0	0	0	0	0	0	0	0	0	0	0	0	0	0	0	0	0	0	0	0	0	0	0	0	0	0	0	0	0	0	0	0	0	0	0	0
15b0d2b420210173be2e8ed929ae50a9	k__Fungi	p__unidentified	c__unidentified	o__unidentified	f__unidentified	g__unidentified	s__unidentified	0	0	0	0	0	0	0	0	0	0	0	0	0	0	0	0	0	0	0	0	0	0	0	0	0	0	0	0	0	0	3	0	0	0	0	0	0	0	0	0	0	0
15b4d2bfad9c440c8fa4744bad6d5298	k__Fungi	p__unidentified	c__unidentified	o__unidentified	f__unidentified	g__unidentified	s__unidentified	0	0	0	0	0	0	0	0	0	0	0	0	0	0	0	0	0	0	0	0	0	0	0	0	0	0	0	0	0	0	0	0	0	0	0	0	0	0	0	0	0	0
15b82aa45e0d453c227a058265c077f1	k__Fungi	p__Ascomycota	c__Saccharomycetes	o__Saccharomycetales	f__Debaryomycetaceae	g__Debaryomyces	s__Debaryomyces_prosopidis	0	0	0	0	0	0	0	0	0	0	0	0	0	0	0	0	0	0	0	0	0	0	0	0	0	0	0	0	0	0	0	0	0	0	0	0	0	3	0	0	0	0
15bc7d035de38f58456d172f0867f4ad	k__Fungi	p__unidentified	c__unidentified	o__unidentified	f__unidentified	g__unidentified	s__unidentified	0	0	0	0	0	0	0	0	0	0	0	0	0	0	0	0	0	0	0	0	0	0	0	0	0	0	0	0	0	0	0	0	0	0	0	0	0	0	0	0	0	0
15bf8d6d56d3290cfb75696f63efe290	k__Fungi	p__unidentified	c__unidentified	o__unidentified	f__unidentified	g__unidentified	s__unidentified	0	0	0	0	0	0	0	0	0	0	0	0	0	0	0	0	0	0	0	0	0	0	0	0	0	0	0	0	0	0	0	0	0	0	0	0	0	0	0	0	0	0
15c1db2929ac5d8f7a12a7d10d29db09	k__Fungi	p__unidentified	c__unidentified	o__unidentified	f__unidentified	g__unidentified	s__unidentified	0	0	0	0	0	0	0	0	0	0	0	0	0	0	0	0	0	0	0	0	0	0	0	0	0	0	0	0	0	0	0	0	0	0	0	0	0	0	0	0	0	0
15c411b529820248f24ac9259cee2ade	k__Fungi	p__unidentified	c__unidentified	o__unidentified	f__unidentified	g__unidentified	s__unidentified	0	0	0	0	0	0	0	0	0	0	0	0	0	0	0	0	0	0	0	0	0	0	0	0	0	0	0	0	0	0	0	0	0	0	0	0	0	0	0	0	0	0
15c4e542d65c4507738074aa3b2b2c19	k__Fungi	p__unidentified	c__unidentified	o__unidentified	f__unidentified	g__unidentified	s__unidentified	0	0	0	0	0	0	0	0	0	0	0	0	0	0	0	0	0	0	0	0	0	0	0	0	0	0	0	0	0	0	0	0	0	0	0	0	0	0	0	0	0	0
15c517b57d05d15b9ff1dcd7a5e85337	k__Fungi	p__unidentified	c__unidentified	o__unidentified	f__unidentified	g__unidentified	s__unidentified	0	0	0	0	0	0	0	0	0	0	0	0	0	0	0	0	0	0	0	0	0	0	0	0	0	0	0	5	0	0	0	0	0	0	0	0	0	0	0	0	0	0
15c5e7971000b76a59cefffb1c1becf9	k__Fungi	p__unidentified	c__unidentified	o__unidentified	f__unidentified	g__unidentified	s__unidentified	0	0	0	0	0	0	0	0	0	0	0	0	0	0	0	0	0	0	0	0	0	0	0	0	0	0	0	0	0	0	0	0	0	0	0	0	0	0	0	0	0	0
15c6caf0f60ccb0a7b5220d8b12573ea	k__Fungi	p__unidentified	c__unidentified	o__unidentified	f__unidentified	g__unidentified	s__unidentified	0	0	0	0	0	0	0	0	0	0	0	0	0	0	0	0	0	0	0	0	0	0	0	0	0	0	0	0	0	0	0	0	0	0	0	0	0	0	0	0	0	0
15c6e6ca2394a63bea261dac6810d8d8	k__Fungi	p__Chytridiomycota	c__unidentified	o__unidentified	f__unidentified	g__unidentified	s__unidentified	0	0	0	0	0	0	0	0	0	0	0	0	0	0	0	0	0	0	0	0	0	0	0	0	0	0	0	0	0	0	0	0	0	0	0	0	0	0	0	0	0	0
15cb2fe22ef0b35ca3952f6ed17aba98	k__Fungi	p__unidentified	c__unidentified	o__unidentified	f__unidentified	g__unidentified	s__unidentified	0	0	0	0	0	0	0	0	0	0	0	0	0	0	0	0	0	0	0	0	0	0	0	0	0	0	0	0	0	0	0	0	0	0	0	0	0	0	0	0	0	0
15ced18dac241b479404b1ac050c25f2	k__Fungi	p__unidentified	c__unidentified	o__unidentified	f__unidentified	g__unidentified	s__unidentified	0	0	0	0	0	0	0	0	0	0	0	0	0	0	0	0	0	0	0	0	0	0	0	0	0	0	0	0	0	0	0	0	0	0	0	0	0	0	0	0	0	0
15cfd23c7ee39c45f101bc4bf2e6ed67	k__Fungi	p__unidentified	c__unidentified	o__unidentified	f__unidentified	g__unidentified	s__unidentified	0	0	0	0	0	0	0	0	0	0	0	0	0	0	0	0	0	0	0	0	0	0	0	0	0	0	0	0	0	0	0	0	0	0	0	0	0	0	0	0	0	0
15d08d1afc1f48d8bfd4241658ddea31	k__Fungi	p__unidentified	c__unidentified	o__unidentified	f__unidentified	g__unidentified	s__unidentified	0	0	0	0	0	0	0	0	0	0	0	0	0	0	0	0	0	0	0	0	0	0	0	0	0	0	0	0	0	0	0	0	0	0	0	0	0	0	0	0	0	0
15d6347d1c1989b75803ccacace51649	k__Fungi	p__unidentified	c__unidentified	o__unidentified	f__unidentified	g__unidentified	s__unidentified	0	0	0	0	0	0	0	0	0	0	0	0	0	0	0	0	0	0	0	0	0	0	0	0	0	0	0	0	0	0	0	0	0	0	0	0	0	0	0	0	0	0
15d6736986fd9627cca37d540a8dc679	k__Fungi	p__unidentified	c__unidentified	o__unidentified	f__unidentified	g__unidentified	s__unidentified	0	4	0	0	0	0	0	0	0	0	0	0	0	0	0	0	0	0	0	0	0	0	0	0	0	0	0	0	0	0	0	0	0	0	0	0	0	0	0	0	0	0
15d9609f4e9bdea647bd2b0a4b3e6dd0	k__Fungi	p__unidentified	c__unidentified	o__unidentified	f__unidentified	g__unidentified	s__unidentified	0	0	0	0	0	0	0	0	0	0	0	0	0	0	0	0	0	0	0	0	0	0	0	0	0	0	0	0	0	0	0	0	0	0	0	0	0	0	0	0	0	0
15df83cc62b57644f007048722c7d51c	k__Fungi	p__Ascomycota	c__Sordariomycetes	o__Hypocreales	f__Nectriaceae	g__Fusarium	s__Fusarium_fujikuroi	0	0	0	0	0	0	0	0	0	0	0	0	0	0	0	0	0	0	0	0	0	0	0	0	0	0	0	0	0	0	0	0	0	0	0	0	0	0	0	0	0	0
15dfa20ac952c4ae1c9c9a453a66405c	k__Fungi	p__unidentified	c__unidentified	o__unidentified	f__unidentified	g__unidentified	s__unidentified	0	0	0	0	0	17	0	0	0	0	0	0	0	0	0	0	0	0	0	0	0	0	0	0	0	0	0	0	0	0	0	0	0	0	0	0	0	0	0	0	0	0
15e1db8bd932974514ed596a30472318	k__Fungi	p__unidentified	c__unidentified	o__unidentified	f__unidentified	g__unidentified	s__unidentified	0	0	0	0	0	0	0	0	0	0	0	0	0	0	0	0	0	0	0	0	0	0	0	0	0	0	0	0	0	0	0	0	0	0	0	0	0	0	0	0	0	0
15e6db41ab2237cb533d23c29243a811	k__Fungi	p__Basidiomycota	c__Agaricostilbomycetes	o__Agaricostilbales	f__Kondoaceae	g__Kondoa	s__Kondoa_malvinella	0	5	0	0	0	0	0	0	0	0	0	0	0	0	0	0	0	0	0	0	0	0	0	0	0	0	0	0	0	0	0	0	0	0	0	0	0	0	121	0	0	0
15e8ca61142998da6be4f5b2fd373067	k__Fungi	p__unidentified	c__unidentified	o__unidentified	f__unidentified	g__unidentified	s__unidentified	0	0	0	0	0	0	0	0	0	0	0	0	0	0	0	0	0	0	0	0	0	0	0	0	0	0	0	0	0	0	0	0	0	0	0	0	0	0	0	0	0	0
15e8ef21b853e45432c01bd0bb768d9f	k__Fungi	p__Chytridiomycota	c__unidentified	o__unidentified	f__unidentified	g__unidentified	s__unidentified	0	0	0	0	0	0	0	0	0	0	0	0	0	0	0	0	0	0	0	0	0	0	0	0	0	0	0	0	0	0	0	0	0	0	0	0	0	0	0	0	0	0
15e9e324b8ecf1612e9acb2db6868b1e	k__Fungi	p__unidentified	c__unidentified	o__unidentified	f__unidentified	g__unidentified	s__unidentified	0	0	0	0	0	0	0	0	0	0	0	0	0	0	0	0	0	0	0	0	0	0	0	0	0	0	0	0	0	0	0	0	0	0	0	0	0	0	0	0	0	0
15ed189a79dcdaa6647aa6d7577143bb	k__Fungi	p__Chytridiomycota	c__unidentified	o__unidentified	f__unidentified	g__unidentified	s__unidentified	0	0	0	0	0	0	0	0	0	0	0	0	0	0	0	0	0	0	0	0	0	0	0	0	0	0	0	0	0	0	0	0	0	0	0	0	0	0	0	0	0	0
15f4185d99de505b831639098afe130d	k__Fungi	p__unidentified	c__unidentified	o__unidentified	f__unidentified	g__unidentified	s__unidentified	0	0	0	0	0	0	26	0	0	0	0	0	0	0	0	0	0	0	0	0	0	0	0	0	0	0	0	0	0	0	0	0	0	0	0	0	0	0	0	0	0	0
15f4b97c49577e9dc5c211448e0ca9aa	k__Fungi	p__unidentified	c__unidentified	o__unidentified	f__unidentified	g__unidentified	s__unidentified	0	0	0	0	0	0	0	0	0	0	0	0	0	0	0	0	0	0	0	0	0	0	0	0	0	0	0	0	0	0	0	0	0	0	0	0	0	0	0	0	0	0
15f53b04d1f7f6ebe532ca336daa77e4	k__Fungi	p__unidentified	c__unidentified	o__unidentified	f__unidentified	g__unidentified	s__unidentified	0	0	0	0	0	0	0	0	0	0	0	0	0	0	0	0	0	0	0	0	0	0	0	0	0	0	0	0	0	0	0	0	0	0	0	0	0	0	0	0	0	0
15f7f4db07d842a53d5f977467c3bdf3	k__Fungi	p__Basidiomycota	c__unidentified	o__unidentified	f__unidentified	g__unidentified	s__unidentified	0	0	0	0	0	0	0	0	0	0	0	0	0	0	0	0	0	0	0	0	0	0	0	0	0	0	0	0	0	0	2	0	0	0	0	0	0	0	0	0	0	0
15ff1befb4ae46ca07e8e6fd62746754	k__Fungi	p__unidentified	c__unidentified	o__unidentified	f__unidentified	g__unidentified	s__unidentified	0	0	0	0	0	0	0	0	0	0	0	0	0	0	0	0	0	0	0	0	0	0	0	0	0	0	0	0	0	0	0	0	0	0	0	0	0	0	0	0	0	0
1602ae3b4c8904007071099ca10fbf57	k__Fungi	p__unidentified	c__unidentified	o__unidentified	f__unidentified	g__unidentified	s__unidentified	0	0	0	0	0	0	0	0	0	0	0	0	0	0	0	0	0	0	0	0	0	0	0	0	0	0	0	0	0	0	0	0	0	0	0	0	0	0	0	0	0	0
1602c3ac72248e4c3960b6f7f73b5966	k__Fungi	p__Chytridiomycota	c__unidentified	o__unidentified	f__unidentified	g__unidentified	s__unidentified	0	0	0	0	0	0	0	0	0	0	0	0	0	0	0	0	0	0	0	0	0	0	0	0	0	0	0	0	0	0	0	0	0	0	0	0	0	0	0	0	0	0
16066bcaad5a1fcb20da8304e11d0acf	k__Fungi	p__unidentified	c__unidentified	o__unidentified	f__unidentified	g__unidentified	s__unidentified	0	0	0	0	0	0	0	0	0	0	0	0	0	0	0	0	0	0	0	0	0	0	0	0	0	0	0	0	0	0	0	0	0	0	0	0	0	0	0	0	0	0
160b0f8ff4330ed7dfd831f5de787923	k__Fungi	p__Ascomycota	c__Eurotiomycetes	o__Eurotiales	f__Aspergillaceae	g__Penicillium	s__Penicillium_sumatraense	0	0	0	0	0	0	0	0	0	0	0	0	0	0	0	0	0	0	0	0	0	0	0	0	0	0	0	0	0	0	3	0	0	0	0	0	0	0	0	0	0	0
160b65061a7b598da08134b31148cd57	k__Fungi	p__Ascomycota	c__Dothideomycetes	o__Capnodiales	f__unidentified	g__unidentified	s__unidentified	0	0	0	0	0	0	0	0	0	0	0	0	0	0	12	0	0	0	0	0	0	0	0	0	0	0	0	0	0	0	0	0	0	0	0	0	0	0	0	0	0	0
160c3eadc31fe1177e4917b97f2757ea	k__Fungi	p__unidentified	c__unidentified	o__unidentified	f__unidentified	g__unidentified	s__unidentified	0	0	0	0	0	0	0	0	0	0	0	0	0	0	0	0	0	0	0	0	0	0	0	0	0	0	0	0	0	0	0	0	0	0	0	0	0	0	0	0	0	0
160efb18f8bd13e600db8188d44ace6b	k__Fungi	p__Ascomycota	c__Sordariomycetes	o__Hypocreales	f__Nectriaceae	g__Fusarium	s__unidentified	0	0	0	0	0	0	0	0	0	0	0	0	0	0	0	0	0	0	0	0	0	0	0	0	0	0	0	0	0	0	0	0	0	0	0	0	0	0	0	0	0	0
1614099f09fe987eadd09572c7934f05	k__Fungi	p__unidentified	c__unidentified	o__unidentified	f__unidentified	g__unidentified	s__unidentified	0	0	0	0	0	0	0	0	0	0	0	0	0	0	0	0	0	0	0	0	0	0	0	0	0	0	0	0	0	0	0	0	0	0	0	0	0	0	0	0	0	0
16173964b969e550a98b5cfe6e2e679e	k__Fungi	p__Ascomycota	c__Sordariomycetes	o__Hypocreales	f__Hypocreales_fam_Incertae_sedis	g__Acremonium	s__unidentified	0	0	0	0	0	0	0	0	0	0	0	0	0	0	0	0	0	0	0	0	0	0	0	0	0	0	0	0	0	0	0	0	0	0	0	0	0	0	72	0	0	0
161779840f1f7dcaeaa81aa6f0d6a549	k__Fungi	p__unidentified	c__unidentified	o__unidentified	f__unidentified	g__unidentified	s__unidentified	0	0	0	0	0	0	0	0	0	0	0	0	0	0	0	0	0	0	0	0	0	0	0	0	0	0	0	0	0	0	0	0	0	0	0	0	0	0	0	0	0	0
161f13befcd75d54da27e41f3c3adbf2	k__Fungi	p__unidentified	c__unidentified	o__unidentified	f__unidentified	g__unidentified	s__unidentified	0	0	0	0	0	0	0	0	0	0	0	0	0	0	0	0	0	0	0	0	0	0	0	0	0	0	0	0	52	0	0	0	0	105	0	0	0	0	0	0	0	0
1620363c1ebb754ef5725af8106043e1	k__Fungi	p__unidentified	c__unidentified	o__unidentified	f__unidentified	g__unidentified	s__unidentified	0	0	0	0	0	0	0	0	90	0	0	0	0	0	0	0	0	0	0	0	0	0	0	0	0	0	0	0	0	0	0	0	0	0	0	0	22	0	0	0	0	0
162361889703a24f3372fc3347110b7a	k__Fungi	p__Rozellomycota	c__unidentified	o__unidentified	f__unidentified	g__unidentified	s__unidentified	0	0	0	0	0	0	0	0	0	0	0	0	0	0	0	0	0	0	0	0	0	0	0	0	0	0	0	0	0	0	0	0	0	0	0	0	0	0	0	0	0	0
16266cd980e0626b7d0f6473607ec786	k__Fungi	p__Chytridiomycota	c__unidentified	o__unidentified	f__unidentified	g__unidentified	s__unidentified	0	0	0	0	0	0	0	0	0	0	0	0	0	0	0	0	0	0	0	0	0	0	0	0	0	0	0	0	0	0	0	0	0	0	0	0	0	0	0	0	0	0
162834d09b8a63061dca7eba2aad5526	k__Fungi	p__unidentified	c__unidentified	o__unidentified	f__unidentified	g__unidentified	s__unidentified	0	0	0	0	0	0	0	0	0	0	0	0	0	0	0	0	0	0	0	0	0	0	0	0	0	0	0	0	0	0	0	0	0	0	0	0	0	0	0	0	0	0
162a1479f89455ce1fc3b21911a6682e	k__Fungi	p__unidentified	c__unidentified	o__unidentified	f__unidentified	g__unidentified	s__unidentified	0	0	0	12	0	0	0	0	0	0	51	0	0	0	0	0	0	0	0	0	0	0	0	0	0	0	0	0	0	0	0	0	0	0	0	0	0	0	0	0	0	0
162e12f5321f7c7bc741dcac148f1296	k__Fungi	p__unidentified	c__unidentified	o__unidentified	f__unidentified	g__unidentified	s__unidentified	0	0	0	0	0	0	0	3	0	0	0	0	0	0	0	0	0	0	0	0	0	0	0	0	0	0	0	0	0	0	0	0	0	0	0	0	0	0	0	0	0	0
162eaefc9dd6c00f1a160cba8fafb6ab	k__Fungi	p__Rozellomycota	c__unidentified	o__unidentified	f__unidentified	g__unidentified	s__unidentified	0	0	0	0	0	0	0	0	0	0	0	0	0	0	0	0	0	0	0	0	0	0	0	0	0	0	0	0	0	0	0	0	0	0	0	0	0	0	0	0	0	0
162f656220abe867775fd9517e95fc90	k__Fungi	p__unidentified	c__unidentified	o__unidentified	f__unidentified	g__unidentified	s__unidentified	0	0	0	0	0	0	0	0	0	0	0	0	0	0	0	0	0	0	0	0	0	0	0	0	0	0	0	0	0	0	0	0	0	0	0	0	0	0	0	0	0	0
1630f761cae1a32f15c5671d646e48ea	k__Fungi	p__unidentified	c__unidentified	o__unidentified	f__unidentified	g__unidentified	s__unidentified	0	0	0	0	0	0	0	0	0	0	0	0	0	0	0	0	0	0	0	0	0	0	0	0	0	0	0	0	0	0	0	0	0	0	0	0	0	0	0	0	0	0
1632f373ee38b0716a729c9cacd470ed	k__Fungi	p__Ascomycota	c__Leotiomycetes	o__Helotiales	f__Helotiales_fam_Incertae_sedis	g__Cadophora	s__Cadophora_luteo-olivacea	0	0	0	0	0	0	0	0	0	0	0	0	0	0	0	0	0	0	0	0	0	0	0	0	0	0	0	0	0	0	0	0	0	0	0	0	0	0	0	0	0	0
1636f95ba6125977d2c851f5da8010a6	k__Fungi	p__unidentified	c__unidentified	o__unidentified	f__unidentified	g__unidentified	s__unidentified	0	0	0	0	0	0	0	0	0	0	0	0	0	0	0	0	0	0	0	0	0	0	0	0	0	0	0	0	0	0	0	0	0	0	0	0	0	0	0	0	0	0
1638f705306d401a5c6a90f05f67532b	k__Fungi	p__unidentified	c__unidentified	o__unidentified	f__unidentified	g__unidentified	s__unidentified	0	0	0	0	0	0	0	0	0	0	0	0	0	0	0	0	0	0	0	0	0	0	0	0	0	0	0	0	0	0	0	0	0	0	0	0	0	0	0	0	0	0
163eb02cdf32aab2a38596aacbb42eb7	k__Fungi	p__Ascomycota	c__Dothideomycetes	o__Pleosporales	f__Didymellaceae	g__Didymella	s__Didymella_glomerata	0	0	0	0	0	0	0	0	0	0	0	0	0	0	0	0	0	0	0	0	0	0	0	0	0	0	0	0	0	0	0	0	0	0	0	0	0	0	0	0	0	0
1643130689f54c85e13a98337ff2df9f	k__Fungi	p__unidentified	c__unidentified	o__unidentified	f__unidentified	g__unidentified	s__unidentified	0	0	0	0	0	0	0	0	0	0	0	0	0	0	0	0	0	0	0	0	0	0	0	0	0	0	0	0	0	0	0	0	0	0	0	0	0	0	0	0	0	0
164b5229e7df46c5ce6c73226c219a43	k__Fungi	p__Ascomycota	c__Sordariomycetes	o__Hypocreales	f__unidentified	g__unidentified	s__unidentified	0	0	0	0	0	0	0	0	0	0	0	0	0	0	0	0	0	0	0	0	0	0	0	0	0	0	0	0	0	0	0	0	0	0	0	0	0	0	0	0	0	0
164c7487b72196751c959da29fbbd0bd	k__Fungi	p__unidentified	c__unidentified	o__unidentified	f__unidentified	g__unidentified	s__unidentified	0	0	0	0	0	0	0	0	0	0	0	0	0	0	0	0	0	0	0	0	0	0	0	0	0	0	0	0	0	0	0	0	0	0	0	0	0	0	0	0	0	0
164fd61304cfa46133e34ce3b0fab42e	k__Fungi	p__Chytridiomycota	c__unidentified	o__unidentified	f__unidentified	g__unidentified	s__unidentified	0	0	0	0	0	0	0	0	0	0	0	0	0	0	0	0	0	0	0	0	2	0	0	0	0	0	0	0	0	0	0	0	0	0	0	0	0	0	0	0	0	0
165e9e0326a050bb08b920f3e2ffdcbf	k__Fungi	p__unidentified	c__unidentified	o__unidentified	f__unidentified	g__unidentified	s__unidentified	0	0	0	0	0	0	0	0	0	0	0	0	0	0	0	0	0	0	0	0	0	0	0	0	0	0	0	0	0	0	0	0	0	0	0	0	0	0	0	0	0	0
166010f85cb4f035460085a0e12fb846	k__Fungi	p__unidentified	c__unidentified	o__unidentified	f__unidentified	g__unidentified	s__unidentified	0	0	0	0	0	0	0	0	0	0	0	0	0	0	0	0	0	0	0	0	0	0	0	0	0	0	0	0	0	0	0	0	0	0	0	0	0	0	0	0	0	0
166219a9cdf4c959b54150336e08d670	k__Fungi	p__unidentified	c__unidentified	o__unidentified	f__unidentified	g__unidentified	s__unidentified	0	0	0	0	0	0	0	0	0	0	0	0	0	0	0	0	0	0	0	0	0	0	0	0	0	0	0	0	0	0	0	0	0	0	0	0	0	0	0	0	0	0
16658031c84b11905cb3c99db8eaffe5	k__Fungi	p__unidentified	c__unidentified	o__unidentified	f__unidentified	g__unidentified	s__unidentified	0	0	0	0	0	0	0	0	0	0	0	0	0	0	0	0	0	0	0	0	0	0	0	0	0	0	0	0	0	0	0	0	0	0	0	0	0	0	0	0	0	0
166803fe4b2c82bb055b354c8c879f78	k__Fungi	p__unidentified	c__unidentified	o__unidentified	f__unidentified	g__unidentified	s__unidentified	0	0	0	0	0	0	0	0	0	0	0	0	0	0	0	0	0	0	0	0	0	0	0	14806	0	0	0	0	0	0	0	0	0	0	0	0	0	0	0	0	0	0
166c08a8c72b9c6f87c672d4de76b375	k__Fungi	p__unidentified	c__unidentified	o__unidentified	f__unidentified	g__unidentified	s__unidentified	0	0	0	0	0	0	0	0	0	0	0	0	0	0	0	0	0	0	0	0	0	0	0	0	0	0	0	0	0	0	0	0	0	0	0	0	0	0	0	0	0	0
166c9bc56afbf9df18de43aa53e6f8ca	k__Fungi	p__unidentified	c__unidentified	o__unidentified	f__unidentified	g__unidentified	s__unidentified	0	0	0	0	0	0	0	0	0	0	0	0	0	0	0	0	0	0	0	0	0	0	0	0	0	0	0	0	0	0	0	0	0	0	0	0	0	0	0	0	0	0
168177c3e82c2ae7505401d0cce88db3	k__Fungi	p__unidentified	c__unidentified	o__unidentified	f__unidentified	g__unidentified	s__unidentified	0	0	0	0	0	0	0	0	0	0	0	0	0	0	0	0	0	0	0	0	0	0	0	0	0	0	0	0	0	0	0	0	0	0	0	0	0	0	0	0	0	0
1682fff3b9b49ccf47768bfefeb95172	k__Fungi	p__unidentified	c__unidentified	o__unidentified	f__unidentified	g__unidentified	s__unidentified	0	0	0	0	0	0	0	0	0	0	0	0	0	0	0	0	0	0	0	0	0	0	0	0	0	0	0	0	0	0	0	0	0	0	0	0	0	0	0	0	0	0
1686517d41389cd6e49d75f58f455536	k__Fungi	p__unidentified	c__unidentified	o__unidentified	f__unidentified	g__unidentified	s__unidentified	0	0	0	0	0	0	0	0	0	0	0	0	0	0	0	0	0	0	0	0	0	0	0	0	0	0	0	0	0	0	0	0	0	0	0	0	0	0	0	0	0	0
168793320c9d15a3d9a9e81837750441	k__Fungi	p__unidentified	c__unidentified	o__unidentified	f__unidentified	g__unidentified	s__unidentified	0	0	0	0	0	0	0	0	0	0	0	0	0	0	0	0	0	0	0	0	0	0	0	0	0	0	0	0	0	0	0	0	0	0	0	0	0	0	0	0	0	0
16880f9a48652117e20faaf49df9ccd0	k__Fungi	p__unidentified	c__unidentified	o__unidentified	f__unidentified	g__unidentified	s__unidentified	0	0	0	0	0	0	0	0	0	0	0	0	0	0	0	0	0	0	0	0	0	0	0	0	0	0	0	0	0	0	0	0	0	0	0	0	0	0	0	0	0	0
168adcae57a02ba6a2f28e1d1e00b474	k__Fungi	p__unidentified	c__unidentified	o__unidentified	f__unidentified	g__unidentified	s__unidentified	0	0	0	0	0	0	0	0	0	0	0	0	0	0	0	0	0	0	0	0	0	0	0	0	0	0	0	0	0	0	0	0	0	0	0	0	0	0	0	0	0	0
168c659ceb36308d40dd6363584492f9	k__Fungi	p__unidentified	c__unidentified	o__unidentified	f__unidentified	g__unidentified	s__unidentified	0	0	0	0	0	0	0	0	0	0	0	0	0	0	0	0	0	0	0	0	0	0	0	0	0	0	0	0	0	0	0	0	0	0	0	0	0	0	0	0	0	0
168cfc2d6a6062af5821f6d43a6a3f62	k__Fungi	p__unidentified	c__unidentified	o__unidentified	f__unidentified	g__unidentified	s__unidentified	0	0	0	0	0	0	0	0	0	0	0	0	0	0	0	0	0	0	0	0	0	0	0	0	0	0	0	0	0	0	0	0	0	0	0	0	0	0	0	0	0	0
168ea9ef2c14e1093f4dbfbf48dd2fb7	k__Fungi	p__unidentified	c__unidentified	o__unidentified	f__unidentified	g__unidentified	s__unidentified	0	23	0	0	0	0	0	0	0	0	0	0	0	8	0	0	0	0	0	0	0	0	0	0	0	0	0	0	0	0	0	0	0	0	0	0	0	0	0	0	0	0
16925a29cdc4952d8999b06bbce0fd59	k__Fungi	p__unidentified	c__unidentified	o__unidentified	f__unidentified	g__unidentified	s__unidentified	0	0	0	0	0	0	0	0	0	0	0	0	0	0	0	0	0	0	0	0	0	0	0	0	0	0	0	0	0	0	0	0	0	0	0	0	0	0	0	0	0	0
1697e004bde1f3e6c7d58155a6e21e3e	k__Fungi	p__Ascomycota	c__Dothideomycetes	o__Pleosporales	f__Didymellaceae	g__unidentified	s__unidentified	0	0	0	0	0	0	0	0	0	0	0	0	0	0	0	0	0	0	0	0	0	0	0	0	0	0	0	0	0	0	0	0	0	0	0	0	0	0	0	0	0	0
16a8b8e1455cbed8946f78147d7c0c27	k__Fungi	p__Ascomycota	c__Dothideomycetes	o__Pleosporales	f__Phaeosphaeriaceae	g__Juncaceicola	s__unidentified	0	0	0	0	0	0	0	0	0	0	0	0	0	0	0	0	0	0	0	0	0	0	0	0	0	0	0	0	0	0	0	0	0	0	0	0	0	0	0	0	0	0
16a999a6b8f588392869f3efc37d0c1c	k__Fungi	p__Chytridiomycota	c__unidentified	o__unidentified	f__unidentified	g__unidentified	s__unidentified	0	0	0	0	0	0	0	0	0	0	0	0	0	0	0	0	0	0	0	0	0	0	0	0	0	0	0	0	0	0	0	0	0	0	0	0	0	0	0	0	0	0
16b3709c44f8738f874d52c4e9ddf26d	k__Fungi	p__unidentified	c__unidentified	o__unidentified	f__unidentified	g__unidentified	s__unidentified	0	0	0	0	0	0	0	0	0	0	0	0	0	0	0	0	0	0	0	0	0	0	0	0	0	0	0	0	0	0	0	0	0	0	0	0	0	0	0	0	0	0
16b44ccab53eaa14666e063fba953a7b	k__Fungi	p__unidentified	c__unidentified	o__unidentified	f__unidentified	g__unidentified	s__unidentified	0	0	0	0	0	0	0	0	0	0	0	0	0	0	0	0	0	0	0	0	0	0	0	0	0	0	0	0	0	0	0	0	0	0	0	0	0	0	0	0	0	0
16b61cf6908929c4f3846e5cb45ca7df	k__Fungi	p__Ascomycota	c__unidentified	o__unidentified	f__unidentified	g__unidentified	s__unidentified	0	0	0	0	0	0	0	0	0	0	0	0	0	0	0	0	0	0	0	0	0	0	0	0	0	0	0	0	0	0	0	0	0	0	0	0	0	0	0	0	0	0
16b7f09e5abc602dc1820e326a9e9790	k__Fungi	p__unidentified	c__unidentified	o__unidentified	f__unidentified	g__unidentified	s__unidentified	0	0	0	0	0	0	0	0	0	0	0	0	0	0	0	0	0	0	0	0	0	0	0	0	0	0	0	0	0	0	0	0	0	0	0	0	0	0	0	0	0	0
16baab9735857772dfb4745d27c57f66	k__Fungi	p__unidentified	c__unidentified	o__unidentified	f__unidentified	g__unidentified	s__unidentified	0	0	0	0	0	0	0	0	0	0	0	0	0	0	0	0	0	0	0	0	0	0	0	0	0	0	0	0	0	0	0	0	0	0	0	0	0	0	0	0	0	0
16bced2e338d83ad88aa7b56528bd6dd	k__Fungi	p__Ascomycota	c__Dothideomycetes	o__Pleosporales	f__Didymosphaeriaceae	g__Laburnicola	s__unidentified	0	0	0	0	0	0	0	0	0	0	0	0	0	0	0	0	0	0	0	0	0	0	0	0	0	0	0	0	0	0	0	0	0	0	0	0	0	0	0	0	0	0
16be4c5e4dfbf308e092f3fc5e2de912	k__Fungi	p__unidentified	c__unidentified	o__unidentified	f__unidentified	g__unidentified	s__unidentified	0	0	0	0	0	0	0	0	0	0	0	0	0	0	0	0	0	0	0	0	0	0	0	0	0	0	0	0	0	0	0	0	0	0	0	0	0	0	0	0	0	0
16be762914600e20da648c8a08f10a68	k__Fungi	p__unidentified	c__unidentified	o__unidentified	f__unidentified	g__unidentified	s__unidentified	0	0	0	0	0	0	0	0	0	0	0	0	0	0	0	0	0	0	0	0	0	0	0	0	0	0	0	0	0	0	0	0	0	0	0	0	0	0	0	0	0	0
16bf163858417ab0a9666c976018154d	k__Fungi	p__unidentified	c__unidentified	o__unidentified	f__unidentified	g__unidentified	s__unidentified	0	29	0	0	0	0	0	0	0	0	0	0	0	0	0	0	0	0	0	0	0	0	0	0	0	0	0	0	0	0	0	0	0	0	0	0	0	0	0	0	0	0
16c778b650c6b9a2517b16bb6976c3f2	k__Fungi	p__Chytridiomycota	c__unidentified	o__unidentified	f__unidentified	g__unidentified	s__unidentified	0	0	0	0	0	0	0	0	0	0	0	0	0	0	0	0	0	0	0	0	0	0	0	0	0	0	0	0	0	0	0	0	0	0	0	0	0	0	0	0	0	0
16d5bf232666662ee438bdef02c185ae	k__Fungi	p__unidentified	c__unidentified	o__unidentified	f__unidentified	g__unidentified	s__unidentified	0	0	0	0	0	0	0	0	0	0	0	0	0	0	0	0	0	0	0	0	0	0	0	0	0	0	0	0	0	0	0	0	0	0	0	0	0	0	0	0	0	0
16d9a0998bc0d5c7ce30c144783dc968	k__Fungi	p__unidentified	c__unidentified	o__unidentified	f__unidentified	g__unidentified	s__unidentified	0	0	0	0	0	0	0	0	0	0	0	0	0	0	0	0	0	0	0	0	0	0	0	0	0	0	0	0	0	0	0	0	0	0	0	0	0	0	0	0	0	0
16dc1df4925168296ab74eb5d1d0e590	k__Fungi	p__unidentified	c__unidentified	o__unidentified	f__unidentified	g__unidentified	s__unidentified	0	0	0	0	0	0	0	0	0	0	0	0	0	0	0	0	0	0	0	0	0	0	0	0	0	0	0	0	0	0	0	0	0	0	0	0	0	0	0	0	0	0
16e4f8900381312a70f058122bfa691b	k__Fungi	p__unidentified	c__unidentified	o__unidentified	f__unidentified	g__unidentified	s__unidentified	0	0	0	0	0	0	0	0	0	0	0	0	0	0	0	0	0	0	0	0	0	0	0	0	0	0	0	0	0	0	0	0	0	0	0	0	0	0	0	0	0	0
16eb3ac7ccc34c2bee4631c379828cea	k__Fungi	p__unidentified	c__unidentified	o__unidentified	f__unidentified	g__unidentified	s__unidentified	0	0	0	0	0	0	0	0	0	0	0	0	0	0	0	0	0	0	0	0	0	0	0	0	0	0	0	0	0	0	0	0	0	0	0	0	0	0	0	0	0	0
16f16b555efebfb90655b0bf87d565f3	k__Fungi	p__Ascomycota	c__Sordariomycetes	o__Hypocreales	f__Hypocreales_fam_Incertae_sedis	g__Acremonium	s__Acremonium_dichromosporum	0	0	0	0	0	0	0	0	0	0	0	0	0	0	0	0	0	0	0	11	0	0	0	0	0	0	0	0	0	0	0	0	0	0	0	0	0	0	0	0	0	0
16f4865086f45c411fd7a958e5d647e5	k__Fungi	p__unidentified	c__unidentified	o__unidentified	f__unidentified	g__unidentified	s__unidentified	0	0	0	0	0	0	0	0	0	0	0	0	0	0	0	0	0	0	0	0	0	0	0	0	0	0	0	0	0	0	0	0	0	0	0	0	0	0	0	0	0	0
16fec73992a27af7708b794d3df8ad26	k__Fungi	p__Mortierellomycota	c__Mortierellomycetes	o__Mortierellales	f__Mortierellaceae	g__Mortierella	s__unidentified	0	0	0	0	0	0	0	0	0	0	0	0	0	0	0	0	0	0	0	0	0	0	0	0	0	0	0	0	0	0	0	0	0	0	0	0	0	0	0	0	0	0
17096ac82488f869db2a551313554c48	k__Fungi	p__unidentified	c__unidentified	o__unidentified	f__unidentified	g__unidentified	s__unidentified	0	0	0	0	0	0	0	0	0	0	0	0	0	0	0	0	0	0	0	0	0	0	0	0	0	0	0	0	0	0	0	0	0	0	0	0	0	0	0	0	0	0
17135bad822a7d00c06fcb90f8577db8	k__Fungi	p__unidentified	c__unidentified	o__unidentified	f__unidentified	g__unidentified	s__unidentified	0	0	0	0	0	0	0	0	0	0	0	0	0	0	0	0	0	0	0	0	0	0	0	0	0	0	0	0	0	0	0	0	0	0	0	0	0	0	0	0	0	0
1714b301d1b4cecf0b2914fd0bd5ad56	k__Fungi	p__unidentified	c__unidentified	o__unidentified	f__unidentified	g__unidentified	s__unidentified	0	0	0	0	0	0	0	0	0	0	0	0	0	0	0	0	0	0	0	0	0	0	0	0	0	0	0	0	0	32	0	0	0	0	0	0	0	0	0	0	0	0
171cf76f93ec9e4bafa312586e207720	k__Fungi	p__unidentified	c__unidentified	o__unidentified	f__unidentified	g__unidentified	s__unidentified	0	0	0	0	0	0	0	0	0	0	0	0	0	0	0	0	0	0	0	0	0	0	0	0	0	0	0	0	0	0	0	0	0	0	0	19	0	0	0	0	0	0
171e352fe2a2076d7791b30ab2715b53	k__Fungi	p__unidentified	c__unidentified	o__unidentified	f__unidentified	g__unidentified	s__unidentified	0	0	0	0	0	0	0	0	0	0	0	0	0	0	0	0	0	0	0	0	0	0	0	0	0	0	0	0	0	0	0	0	0	0	0	0	0	0	0	0	0	0
171f3622c8fa68a6f5953c476f7367e6	k__Fungi	p__unidentified	c__unidentified	o__unidentified	f__unidentified	g__unidentified	s__unidentified	0	0	0	0	0	0	0	0	0	0	0	0	0	0	0	0	0	0	0	0	0	0	0	0	0	0	0	0	0	0	0	0	0	0	0	0	0	0	0	0	0	0
172116a1e3d6e094317cdb8eea20d830	k__Fungi	p__unidentified	c__unidentified	o__unidentified	f__unidentified	g__unidentified	s__unidentified	0	0	0	0	0	0	0	0	0	0	0	0	0	0	0	0	0	0	0	0	0	0	0	0	0	0	0	0	0	0	0	0	0	0	0	0	0	0	0	0	0	0
172457a14c894ffd8aebf34c14c30b48	k__Fungi	p__unidentified	c__unidentified	o__unidentified	f__unidentified	g__unidentified	s__unidentified	0	0	0	0	0	0	0	0	0	0	0	0	0	0	0	0	0	0	0	0	0	0	0	0	0	0	0	0	0	0	0	0	0	0	0	0	0	0	0	0	0	0
17282499a325c72e7c4696a75c3a3752	k__Fungi	p__Rozellomycota	c__Rozellomycotina_cls_Incertae_sedis	o__GS05	f__unidentified	g__unidentified	s__unidentified	0	0	0	0	0	0	0	0	0	0	0	0	0	0	0	0	0	0	0	0	0	0	0	0	0	0	0	0	0	0	0	0	0	0	0	0	0	0	0	0	0	0
172a58b491e734cbd20714887ae02b2a	k__Fungi	p__Basidiomycota	c__Microbotryomycetes	o__Leucosporidiales	f__Leucosporidiaceae	g__Leucosporidium	s__unidentified	0	0	0	0	0	0	0	0	0	0	0	0	0	0	0	0	0	0	0	0	0	0	0	0	0	0	0	0	0	0	0	0	0	0	0	0	0	0	0	0	0	0
172ab7501a7fa8a7ba913b166f38f1b6	k__Fungi	p__unidentified	c__unidentified	o__unidentified	f__unidentified	g__unidentified	s__unidentified	0	0	0	0	0	0	0	0	0	0	0	0	0	0	0	0	0	0	0	0	0	0	0	0	0	0	0	0	0	0	0	0	0	0	0	0	0	0	0	0	0	0
17349d4ffdd44a96f2ac77aba2884abe	k__Fungi	p__Ascomycota	c__Leotiomycetes	o__Thelebolales	f__Pseudeurotiaceae	g__Pseudeurotium	s__Pseudeurotium_hygrophilum	0	0	0	0	0	0	0	0	0	0	0	0	0	0	0	0	0	0	0	0	0	0	0	0	0	0	0	0	0	0	0	0	0	0	0	0	0	0	0	0	0	0
173abfb35082ff58230eb5174fdb9c83	k__Fungi	p__unidentified	c__unidentified	o__unidentified	f__unidentified	g__unidentified	s__unidentified	0	0	0	0	0	0	0	0	0	0	0	0	0	0	0	0	0	0	0	0	0	0	0	0	0	0	0	0	0	0	0	0	0	0	0	0	0	0	0	0	0	0
173f3cafc0b36f3bf81c771c84931cfa	k__Fungi	p__Basidiomycota	c__Microbotryomycetes	o__Kriegeriales	f__Kriegeriaceae	g__Phenoliferia	s__Phenoliferia_psychrophila	0	0	0	0	0	0	0	0	0	0	0	0	0	0	0	0	0	0	0	0	0	0	0	0	0	0	0	0	0	0	0	0	0	0	0	0	0	0	0	0	0	0
174839c3c2739d0c9458fa0734732f54	k__Fungi	p__Rozellomycota	c__unidentified	o__unidentified	f__unidentified	g__unidentified	s__unidentified	0	0	0	0	0	0	0	0	0	0	0	0	0	0	0	0	0	0	0	0	0	0	0	0	0	0	0	0	0	0	0	0	0	0	0	0	0	0	0	0	0	0
174a04c4580c65de6aec6b95b33731dc	k__Fungi	p__unidentified	c__unidentified	o__unidentified	f__unidentified	g__unidentified	s__unidentified	0	0	0	0	0	0	0	0	0	0	0	0	0	0	0	0	0	0	0	0	0	0	0	0	0	0	0	0	0	0	0	0	0	0	0	0	0	0	0	0	0	0
174b41fe196c670040ef4a21780edcc7	k__Fungi	p__Ascomycota	c__Saccharomycetes	o__Saccharomycetales	f__Trichomonascaceae	g__Blastobotrys	s__Blastobotrys_adeninivorans	0	0	0	0	0	0	0	0	0	0	0	0	0	0	0	0	0	0	0	0	0	0	0	0	0	0	0	0	0	0	0	0	0	0	0	0	0	5	0	0	0	0
17574dfe90cc659948b1d39f00562185	k__Fungi	p__unidentified	c__unidentified	o__unidentified	f__unidentified	g__unidentified	s__unidentified	0	0	0	0	0	0	0	0	0	0	0	0	0	0	0	0	0	0	0	0	0	0	0	0	0	0	0	0	0	0	0	0	0	0	0	0	0	0	0	0	0	0
175e79aafd8d20469187d46cd68cd1a4	k__Fungi	p__Basidiomycota	c__Agaricomycetes	o__Cantharellales	f__Cantharellales_fam_Incertae_sedis	g__Sistotrema	s__Sistotrema_autumnale	0	0	0	26	0	0	0	0	0	0	0	0	0	0	0	0	0	0	0	0	0	0	0	0	0	0	0	0	0	0	0	0	0	0	0	0	0	0	0	0	0	0
17690ac470a5612eaf5b0eacebbd63f6	k__Fungi	p__unidentified	c__unidentified	o__unidentified	f__unidentified	g__unidentified	s__unidentified	0	0	0	0	0	0	0	0	0	0	0	0	0	0	0	0	0	0	0	0	0	0	0	0	0	0	0	0	0	0	0	0	0	0	0	0	0	0	0	0	0	0
176b75cf29646aed1366f551b0bd02f7	k__Fungi	p__unidentified	c__unidentified	o__unidentified	f__unidentified	g__unidentified	s__unidentified	0	0	0	0	0	0	0	0	0	0	0	0	0	0	0	0	0	0	0	0	0	0	0	0	0	0	0	0	0	0	0	0	0	0	0	0	0	0	0	0	0	0
17707798427af6b9fc19a010c161905b	k__Fungi	p__unidentified	c__unidentified	o__unidentified	f__unidentified	g__unidentified	s__unidentified	0	0	0	0	0	0	0	0	0	0	0	0	0	0	0	0	0	0	0	0	0	0	0	0	0	0	0	0	0	0	0	0	0	0	0	0	0	0	0	0	0	0
1773dbdb53fbcbde19c00a7a00160b15	k__Fungi	p__unidentified	c__unidentified	o__unidentified	f__unidentified	g__unidentified	s__unidentified	0	0	0	0	0	0	0	0	0	0	0	0	0	0	0	0	0	0	0	0	0	0	0	0	0	0	0	0	0	0	0	0	0	0	0	0	0	0	0	0	0	0
1774687201064a702dae6831e3d9db81	k__Fungi	p__unidentified	c__unidentified	o__unidentified	f__unidentified	g__unidentified	s__unidentified	0	0	0	0	0	0	0	0	0	0	0	0	0	0	0	0	0	0	0	0	0	0	0	0	0	0	0	0	0	49	0	0	0	0	0	0	0	0	0	0	0	0
177a4028e0ad95bb86dcacab4874219a	k__Fungi	p__unidentified	c__unidentified	o__unidentified	f__unidentified	g__unidentified	s__unidentified	0	0	0	0	0	0	0	0	0	0	0	0	0	0	0	0	0	0	0	0	0	0	0	0	0	0	0	0	0	0	0	0	0	0	0	0	0	0	0	0	0	0
177b583df850bb669a92fd7356dbbba6	k__Fungi	p__unidentified	c__unidentified	o__unidentified	f__unidentified	g__unidentified	s__unidentified	0	0	4	0	0	0	0	0	0	0	0	0	0	0	0	0	0	0	0	0	0	0	0	0	0	0	0	0	0	0	0	0	0	0	0	0	0	0	0	0	0	0
177b90c370fc4799230f2e472873fb35	k__Fungi	p__Rozellomycota	c__unidentified	o__unidentified	f__unidentified	g__unidentified	s__unidentified	0	0	0	0	0	0	0	0	0	0	0	0	0	0	0	0	0	0	0	0	0	0	0	0	0	0	0	0	0	0	0	0	0	0	0	0	0	0	0	0	0	0
177d2cf20bae3799e7115ac6a02f8ec0	k__Fungi	p__unidentified	c__unidentified	o__unidentified	f__unidentified	g__unidentified	s__unidentified	0	0	0	0	0	0	0	0	0	0	0	0	0	0	0	0	0	0	0	0	0	0	0	0	0	0	0	0	0	0	0	0	0	0	0	0	0	0	0	0	0	0
1780eb527f5a676ff0c32c7296c098f7	k__Fungi	p__Chytridiomycota	c__unidentified	o__unidentified	f__unidentified	g__unidentified	s__unidentified	0	0	0	0	0	0	0	0	0	0	0	0	0	0	0	0	0	0	0	0	0	0	0	0	0	0	0	0	0	0	0	0	0	0	0	0	0	0	0	0	0	0
17839a2ed4cb7ba848793bf99b6a4ed9	k__Fungi	p__unidentified	c__unidentified	o__unidentified	f__unidentified	g__unidentified	s__unidentified	0	0	0	0	0	0	0	0	7	0	0	0	0	0	0	0	0	0	0	0	0	0	0	0	0	0	0	0	0	0	0	0	0	0	0	0	0	0	0	0	0	0
1785bd5967ea49a93a529207db1ae64c	k__Fungi	p__unidentified	c__unidentified	o__unidentified	f__unidentified	g__unidentified	s__unidentified	0	0	0	0	0	0	0	0	0	0	0	0	0	0	0	0	0	0	0	0	0	0	0	0	0	0	0	0	0	0	0	0	0	0	0	0	0	0	0	0	0	0
17876a985cbdc5cfdf28a677ea0401ad	k__Fungi	p__unidentified	c__unidentified	o__unidentified	f__unidentified	g__unidentified	s__unidentified	0	0	0	0	0	0	0	0	0	0	0	0	0	0	0	0	0	0	0	0	0	0	0	0	0	0	0	0	0	0	0	0	0	0	0	0	0	0	0	0	0	0
1788da8d929ef4eed3dd7807f461e436	k__Fungi	p__Ascomycota	c__unidentified	o__unidentified	f__unidentified	g__unidentified	s__unidentified	0	0	0	0	0	0	0	0	0	0	0	0	0	0	0	0	0	0	0	0	0	0	0	0	0	0	0	0	0	0	0	0	0	0	0	0	0	0	0	0	0	0
17897a937b77be170f35d546797554e3	k__Fungi	p__Ascomycota	c__Sordariomycetes	o__Hypocreales	f__Hypocreales_fam_Incertae_sedis	g__Acremonium	s__Acremonium_biseptum	0	0	0	0	0	0	0	0	0	0	7	0	0	0	0	0	0	0	0	0	0	0	0	0	14	0	326	0	0	0	0	0	0	0	0	0	0	0	0	0	0	0
178aed2d168c55d84a7bdeb9451011de	k__Fungi	p__Ascomycota	c__Leotiomycetes	o__Helotiales	f__Hyaloscyphaceae	g__Hyphodiscus	s__unidentified	0	0	0	0	0	0	0	0	0	0	0	0	0	0	0	0	0	0	0	0	0	0	0	0	0	0	0	0	0	0	0	0	0	0	0	0	0	0	0	0	0	0
1791cb527d3553d879836322ea01f3c8	k__Fungi	p__unidentified	c__unidentified	o__unidentified	f__unidentified	g__unidentified	s__unidentified	0	59	104	0	0	9	0	0	0	0	0	0	0	0	0	0	0	0	0	0	0	0	0	0	0	0	0	0	0	0	0	0	0	0	0	0	0	0	8	10	0	0
1793f1f20ab8dd9c75a28224cf44baf7	k__Fungi	p__Ascomycota	c__Dothideomycetes	o__Pleosporales	f__Torulaceae	g__Torula	s__unidentified	0	0	0	0	0	0	0	0	0	0	0	0	0	0	0	0	0	0	0	0	0	0	0	0	0	0	0	0	0	0	0	0	0	0	0	0	0	0	0	0	0	0
1794f7eadafbbe2dc6f3e4e5abc842ed	k__Fungi	p__Ascomycota	c__Sordariomycetes	o__Hypocreales	f__Nectriaceae	g__Xenoacremonium	s__Xenoacremonium_falcatum	0	0	0	0	0	0	0	0	0	0	0	0	0	0	0	0	0	0	0	0	0	0	0	0	0	0	0	0	0	0	0	0	0	0	0	0	0	0	0	0	0	0
179c791f6ab71b87de529532d556527f	k__Fungi	p__Chytridiomycota	c__unidentified	o__unidentified	f__unidentified	g__unidentified	s__unidentified	0	0	0	0	0	0	0	0	0	0	0	0	0	0	0	0	0	0	0	0	0	0	0	0	0	0	0	0	0	0	0	0	0	0	0	0	0	0	0	0	0	0
17ad87e3326356f080c27816a2ceda4e	k__Fungi	p__unidentified	c__unidentified	o__unidentified	f__unidentified	g__unidentified	s__unidentified	0	0	0	0	0	0	0	0	0	0	0	0	0	0	0	0	0	0	0	0	0	0	0	0	0	0	0	0	0	0	0	0	0	0	0	0	0	0	0	0	0	0
17b47fc7aeaabec0327bb60bade0d953	k__Fungi	p__unidentified	c__unidentified	o__unidentified	f__unidentified	g__unidentified	s__unidentified	0	0	0	0	0	0	0	0	0	0	0	0	0	0	0	0	0	0	0	0	0	0	0	0	0	0	0	0	0	0	0	0	0	0	0	0	0	0	0	0	0	0
17b5b982dd1eeeda282c6b17476c91de	k__Fungi	p__unidentified	c__unidentified	o__unidentified	f__unidentified	g__unidentified	s__unidentified	0	0	0	0	0	0	0	0	0	0	0	0	0	0	0	0	0	0	0	0	0	0	0	0	0	0	0	0	0	0	0	0	0	0	0	0	0	0	0	0	0	0
17b6dc070154c75d2aeafe379f8c3cf6	k__Fungi	p__unidentified	c__unidentified	o__unidentified	f__unidentified	g__unidentified	s__unidentified	0	0	0	0	0	0	0	0	0	0	0	0	0	0	0	0	0	0	0	0	0	0	0	0	0	0	0	0	0	0	0	0	0	0	0	0	0	0	0	0	0	0
17b76f61c0e856eb4a7ef6d131dc0895	k__Fungi	p__Basidiomycota	c__Microbotryomycetes	o__Leucosporidiales	f__Leucosporidiaceae	g__Leucosporidium	s__unidentified	27	0	0	0	0	0	0	0	0	0	0	0	4	0	0	0	0	0	0	0	0	0	0	0	0	0	0	0	0	0	0	0	0	0	0	0	0	452	0	0	0	0
17ba46821ffbd935ddb409d4ae5ee309	k__Fungi	p__Ascomycota	c__Lecanoromycetes	o__Trapeliales	f__Trapeliaceae	g__Placopsis	s__unidentified	0	0	0	0	0	0	0	0	0	0	0	0	0	0	3	0	0	0	0	0	0	0	0	0	0	0	0	0	0	0	0	0	0	0	0	0	0	0	0	0	0	0
17c0353c6b07ee53cb289af5607a3e20	k__Fungi	p__Ascomycota	c__Sordariomycetes	o__Hypocreales	f__Nectriaceae	g__Fusarium	s__Fusarium_solani	0	0	0	0	0	0	0	0	0	0	0	0	0	0	0	0	0	0	0	0	0	0	0	0	0	0	0	0	0	0	0	0	0	0	0	0	0	0	0	0	0	0
17c0b3090c16650bfc01be4998b16674	k__Fungi	p__unidentified	c__unidentified	o__unidentified	f__unidentified	g__unidentified	s__unidentified	0	0	0	0	0	0	0	0	0	0	0	0	0	0	0	0	0	0	0	0	0	0	0	0	0	0	0	0	0	0	0	0	0	0	0	0	0	0	0	0	0	0
17c1f6ede1e8007d1f88af16f2d224a7	k__Fungi	p__Ascomycota	c__Dothideomycetes	o__Pleosporales	f__Pleosporaceae	g__Alternaria	s__Alternaria_angustiovoidea	0	0	0	0	0	0	0	0	0	0	0	0	0	0	0	0	0	0	0	0	0	0	0	0	0	0	0	0	0	0	0	0	0	0	0	0	0	0	0	0	0	0
17c4a01589e348a7581854b371658fed	k__Fungi	p__unidentified	c__unidentified	o__unidentified	f__unidentified	g__unidentified	s__unidentified	0	0	0	0	0	0	0	0	0	0	0	0	0	0	0	0	0	15	0	0	0	0	0	0	0	0	0	0	0	0	0	0	0	0	0	0	0	0	0	0	0	0
17c656486698fa603bc1fba9d78dfe22	k__Fungi	p__unidentified	c__unidentified	o__unidentified	f__unidentified	g__unidentified	s__unidentified	0	0	0	0	0	0	0	0	0	0	0	0	0	0	0	0	0	0	0	0	0	0	0	0	0	0	0	0	0	0	0	0	0	0	0	0	0	0	0	0	0	0
17c6e7ef41d9f1e5f839ed53fb046592	k__Fungi	p__unidentified	c__unidentified	o__unidentified	f__unidentified	g__unidentified	s__unidentified	0	0	0	0	0	0	0	0	0	0	0	0	0	0	0	0	0	0	0	0	0	0	0	0	0	0	0	0	0	0	0	0	0	0	0	0	0	0	0	0	0	0
17c8b1354fea33c8639ee7e6972ffa40	k__Fungi	p__unidentified	c__unidentified	o__unidentified	f__unidentified	g__unidentified	s__unidentified	0	0	0	0	0	0	0	0	0	0	0	0	0	0	0	0	0	0	0	0	0	0	0	0	0	0	0	0	0	0	0	0	0	0	0	0	0	0	0	0	0	0
17cdccb32f27b36948078047c485925a	k__Fungi	p__Ascomycota	c__unidentified	o__unidentified	f__unidentified	g__unidentified	s__unidentified	0	0	0	0	0	0	0	0	0	0	0	0	0	0	0	0	0	0	0	0	0	0	0	0	0	0	0	0	0	0	0	0	0	0	0	0	0	0	0	0	0	0
17cff64918bed8b279930056d3693879	k__Fungi	p__unidentified	c__unidentified	o__unidentified	f__unidentified	g__unidentified	s__unidentified	0	0	0	0	0	0	0	0	0	0	0	0	0	0	0	0	0	0	0	0	0	0	0	0	0	0	0	0	0	0	0	0	0	0	0	0	0	0	0	0	0	0
17d341dcf445fba066ff09fb558f152c	k__Fungi	p__unidentified	c__unidentified	o__unidentified	f__unidentified	g__unidentified	s__unidentified	0	0	0	0	0	0	0	0	0	0	0	0	0	0	0	0	0	0	0	0	0	0	0	0	0	0	176	0	0	0	0	0	0	0	0	0	0	0	0	0	0	0
17d4ebdaa14bb2e26f9acf31d13b54f8	k__Fungi	p__Ascomycota	c__Sordariomycetes	o__Hypocreales	f__Nectriaceae	g__Xenoacremonium	s__Xenoacremonium_falcatum	0	0	0	0	0	0	0	0	0	0	0	0	0	0	0	0	0	0	0	0	0	0	0	0	0	0	0	0	0	0	0	0	0	0	0	0	0	0	0	0	0	0
17d8b9d9bf96cf1ee6722bacf2390dce	k__Fungi	p__Chytridiomycota	c__unidentified	o__unidentified	f__unidentified	g__unidentified	s__unidentified	0	0	0	0	0	0	0	0	0	0	0	0	0	0	0	0	0	0	0	0	0	0	0	0	0	0	0	0	0	0	0	0	0	0	0	0	0	0	0	0	0	0
17dc99724df9c81c0d1bdb3a92345af2	k__Fungi	p__unidentified	c__unidentified	o__unidentified	f__unidentified	g__unidentified	s__unidentified	0	0	0	0	0	0	0	0	0	0	0	0	0	0	0	0	0	0	0	0	0	0	0	0	0	0	0	0	0	0	0	0	0	0	0	0	0	0	0	0	0	0
17e401ac99c0187d58704698909df3b8	k__Fungi	p__unidentified	c__unidentified	o__unidentified	f__unidentified	g__unidentified	s__unidentified	0	0	0	0	0	0	0	0	0	0	0	0	0	0	0	0	0	0	0	0	0	0	0	0	0	0	0	0	0	0	0	0	0	0	0	0	0	0	0	0	0	0
17e9386dd2ffe15255eb435698c60644	k__Fungi	p__unidentified	c__unidentified	o__unidentified	f__unidentified	g__unidentified	s__unidentified	0	0	0	0	0	0	0	0	0	0	0	0	0	0	0	0	0	0	0	0	0	0	0	0	0	0	0	0	0	0	0	0	0	0	0	0	0	0	0	0	0	0
17eb250f331d4b50cfc5fdf54245f76a	k__Fungi	p__unidentified	c__unidentified	o__unidentified	f__unidentified	g__unidentified	s__unidentified	0	0	0	0	0	0	0	0	0	0	0	0	0	0	0	0	0	0	0	0	0	0	0	0	0	0	0	0	0	0	0	0	0	0	0	0	0	0	0	0	0	0
17eb3d8c4778a4953fa906089489af6b	k__Fungi	p__unidentified	c__unidentified	o__unidentified	f__unidentified	g__unidentified	s__unidentified	0	0	0	0	0	0	0	0	0	0	0	0	0	0	0	0	0	0	0	0	0	0	0	0	0	0	0	0	0	0	0	0	0	0	0	0	0	0	0	0	0	0
17ec31d5a26922bd4edbbd992fd692f9	k__Fungi	p__unidentified	c__unidentified	o__unidentified	f__unidentified	g__unidentified	s__unidentified	0	0	0	0	0	0	0	0	0	0	0	0	0	0	0	0	0	0	0	0	0	0	0	0	0	0	0	0	0	0	0	0	0	0	0	0	0	0	0	0	0	0
17f0faa904f7ea4d089eaab347f6d672	k__Fungi	p__Chytridiomycota	c__unidentified	o__unidentified	f__unidentified	g__unidentified	s__unidentified	0	0	0	0	0	0	0	0	0	0	0	0	0	0	0	0	0	0	0	0	0	0	0	0	0	0	0	0	0	0	0	0	0	0	0	0	0	0	0	0	0	0
17f77a0593baea4d7615f9a24c43b7e0	k__Fungi	p__unidentified	c__unidentified	o__unidentified	f__unidentified	g__unidentified	s__unidentified	0	0	0	0	0	0	0	0	0	0	0	0	0	0	0	0	0	0	0	0	0	0	0	0	0	0	0	0	0	0	0	0	0	0	0	0	0	0	0	0	0	0
17fa3115891866cf3bd8a8213e5f3fb8	k__Fungi	p__Chytridiomycota	c__unidentified	o__unidentified	f__unidentified	g__unidentified	s__unidentified	0	0	0	0	0	0	0	0	0	0	0	0	0	0	0	0	0	0	0	0	0	0	0	0	0	0	0	0	0	0	0	0	0	0	0	0	0	0	0	0	0	0
180b63a5289ca16200e3e75a3ac02651	k__Fungi	p__unidentified	c__unidentified	o__unidentified	f__unidentified	g__unidentified	s__unidentified	0	0	0	0	0	0	0	0	0	0	0	0	0	0	0	0	0	0	0	0	0	0	0	0	0	0	0	0	0	0	0	0	0	0	0	0	0	0	0	0	0	0
1810238bda9191dfcf586668e7e58c37	k__Fungi	p__unidentified	c__unidentified	o__unidentified	f__unidentified	g__unidentified	s__unidentified	0	0	0	0	0	0	0	0	0	0	0	0	0	0	0	0	0	0	0	0	0	0	0	0	0	0	0	0	0	0	0	0	0	0	0	0	0	0	0	0	0	0
1811a1ba7e09ca44b4d56ac59aab28fc	k__Fungi	p__unidentified	c__unidentified	o__unidentified	f__unidentified	g__unidentified	s__unidentified	0	0	0	0	0	0	0	0	0	0	0	0	0	0	0	0	0	0	0	0	0	0	0	0	0	0	0	0	0	0	0	0	0	0	0	0	0	0	0	0	0	0
18171c36a40841212de87af397ecbc33	k__Fungi	p__Chytridiomycota	c__unidentified	o__unidentified	f__unidentified	g__unidentified	s__unidentified	0	0	0	0	0	0	0	0	0	0	0	0	0	0	0	0	0	0	0	0	0	0	0	0	0	0	0	0	0	0	0	0	0	0	0	0	0	0	0	0	0	0
181755f69348f00c85bf59d367ce1b63	k__Fungi	p__Chytridiomycota	c__unidentified	o__unidentified	f__unidentified	g__unidentified	s__unidentified	0	0	0	0	0	0	0	0	0	0	0	0	0	0	0	0	0	0	0	0	0	0	0	0	0	0	0	0	0	0	0	0	0	0	0	0	0	0	0	0	0	0
181ecebcb1529c81fe86c122cafeaf21	k__Fungi	p__unidentified	c__unidentified	o__unidentified	f__unidentified	g__unidentified	s__unidentified	0	0	0	0	0	0	0	0	0	0	0	0	0	0	0	0	0	0	0	0	0	0	0	0	0	0	0	0	0	0	0	0	0	0	0	0	0	0	0	0	0	0
1821f3dcb47177d5e1d7d6ba0ca5c439	k__Fungi	p__unidentified	c__unidentified	o__unidentified	f__unidentified	g__unidentified	s__unidentified	0	0	0	0	0	0	0	0	0	0	0	0	0	0	0	0	0	0	0	0	0	0	0	0	0	0	0	0	0	0	0	0	0	0	0	0	0	0	0	0	0	0
1823371bb56cadbbb951ea5253853541	k__Fungi	p__unidentified	c__unidentified	o__unidentified	f__unidentified	g__unidentified	s__unidentified	0	0	0	0	0	0	0	0	0	0	0	0	0	0	0	0	0	0	0	0	0	0	0	0	0	0	0	0	0	0	0	0	0	0	0	0	0	0	0	0	0	0
182582739cf13a8dec27a6b3331be435	k__Fungi	p__unidentified	c__unidentified	o__unidentified	f__unidentified	g__unidentified	s__unidentified	0	0	0	0	0	0	0	0	0	0	0	0	0	0	0	0	0	0	0	0	0	0	0	0	0	0	0	0	0	0	0	0	0	0	0	0	0	0	0	0	0	0
1826a81547bc7804018d331334f57cf2	k__Fungi	p__unidentified	c__unidentified	o__unidentified	f__unidentified	g__unidentified	s__unidentified	0	0	0	0	0	0	0	0	0	0	0	0	0	0	0	0	0	0	0	0	0	0	0	0	0	0	0	0	0	0	0	0	0	0	0	0	0	0	0	0	0	0
1832f7bb8b108ea2467ff7f3b3282e2e	k__Fungi	p__unidentified	c__unidentified	o__unidentified	f__unidentified	g__unidentified	s__unidentified	0	0	0	0	0	0	0	0	0	0	0	0	0	0	0	0	0	0	0	0	1309	0	0	0	0	0	0	0	0	0	0	0	0	0	0	0	0	0	0	0	0	0
1834c9e65b84cc0fc3e240623fb21119	k__Fungi	p__Ascomycota	c__Leotiomycetes	o__Helotiales	f__Helotiales_fam_Incertae_sedis	g__Cadophora	s__Cadophora_luteo-olivacea	0	0	0	0	0	0	0	0	0	0	0	47	0	0	0	0	0	0	0	0	0	0	0	0	0	0	0	0	0	0	0	0	0	0	0	0	0	0	0	0	0	0
183528573fd46e7e025ad6fd4cf84ccf	k__Fungi	p__unidentified	c__unidentified	o__unidentified	f__unidentified	g__unidentified	s__unidentified	0	0	0	0	0	0	0	0	0	0	0	0	0	0	0	0	0	0	0	0	0	0	0	0	0	0	0	0	0	0	0	0	0	0	0	0	0	0	0	0	0	0
1835edc803531172c90b596dfc1be9fa	k__Fungi	p__unidentified	c__unidentified	o__unidentified	f__unidentified	g__unidentified	s__unidentified	0	0	0	0	0	0	0	0	0	0	0	0	0	0	0	0	0	0	0	0	0	0	0	0	0	0	0	0	0	0	0	0	0	0	0	0	0	0	0	0	0	0
183f8f6eaed8997e1b519501066db4d5	k__Fungi	p__unidentified	c__unidentified	o__unidentified	f__unidentified	g__unidentified	s__unidentified	0	0	0	0	0	0	15	0	0	0	0	0	33	0	0	0	0	0	0	0	0	0	0	0	0	0	0	0	0	0	318	0	0	0	0	0	0	25	0	0	0	0
18403d551b2b69156f59e8b265302ad1	k__Fungi	p__Ascomycota	c__Eurotiomycetes	o__Chaetothyriales	f__Herpotrichiellaceae	g__Exophiala	s__Exophiala_equina	0	0	0	0	0	0	0	0	0	0	0	0	0	0	0	0	0	0	0	0	0	0	76	0	0	0	0	0	0	0	0	0	0	0	0	0	0	0	0	0	0	0
1841b2d3d52d21e4c4cdc6885e8b1abc	k__Fungi	p__unidentified	c__unidentified	o__unidentified	f__unidentified	g__unidentified	s__unidentified	0	0	0	0	0	0	0	0	0	0	0	0	0	0	0	0	0	0	0	0	0	0	0	0	0	0	0	0	0	0	0	0	0	0	0	0	0	0	0	0	0	0
184f6ad6f85b2773e71e78deda0e9714	k__Fungi	p__unidentified	c__unidentified	o__unidentified	f__unidentified	g__unidentified	s__unidentified	0	0	0	0	0	0	0	0	0	0	0	0	0	0	0	0	0	0	0	0	0	0	0	0	0	0	0	0	0	0	0	0	0	0	0	0	0	0	0	0	0	0
1854f628fb436451fca23563122545ad	k__Fungi	p__unidentified	c__unidentified	o__unidentified	f__unidentified	g__unidentified	s__unidentified	0	0	0	0	0	0	0	0	0	0	0	0	0	0	0	0	0	0	0	0	0	0	0	0	0	0	0	0	0	0	0	0	0	0	0	0	0	0	0	0	0	0
185788b3840bbbd2e988a805a3f137c4	k__Fungi	p__unidentified	c__unidentified	o__unidentified	f__unidentified	g__unidentified	s__unidentified	0	0	0	0	0	0	0	0	0	0	0	0	0	0	0	0	0	0	0	0	0	0	0	0	0	0	0	0	0	0	0	0	0	0	0	0	0	0	0	0	0	0
18595e9170c759a4ceffc276b8b31d17	k__Fungi	p__unidentified	c__unidentified	o__unidentified	f__unidentified	g__unidentified	s__unidentified	0	0	0	0	0	0	0	0	0	0	0	0	0	0	0	0	0	0	0	0	0	0	0	0	0	0	0	0	0	0	0	0	0	0	0	0	0	0	0	0	0	0
185b81d3eb7593dddc829e5927de2594	k__Fungi	p__Rozellomycota	c__unidentified	o__unidentified	f__unidentified	g__unidentified	s__unidentified	0	0	0	0	0	0	0	0	0	0	0	0	0	0	0	0	0	0	0	0	0	0	0	0	0	0	0	0	0	0	0	0	0	0	0	0	0	0	0	0	0	0
1860dbb51d460abde3503950dcf96543	k__Fungi	p__unidentified	c__unidentified	o__unidentified	f__unidentified	g__unidentified	s__unidentified	0	0	0	0	0	0	0	0	0	0	0	0	0	0	0	0	0	0	0	0	0	0	0	0	0	0	0	0	0	0	0	0	0	0	0	0	0	0	0	0	0	0
1862cbf49863af50bb3bfda2bd49fb1e	k__Fungi	p__Ascomycota	c__Leotiomycetes	o__Helotiales	f__Hyaloscyphaceae	g__Gyoerffyella	s__unidentified	0	0	0	0	0	0	0	0	0	0	0	0	0	0	0	0	0	0	0	0	49	0	0	0	0	0	0	0	0	0	0	0	0	0	0	0	0	0	0	0	0	0
186675ba824636313a33b9871a9cf8c4	k__Fungi	p__unidentified	c__unidentified	o__unidentified	f__unidentified	g__unidentified	s__unidentified	0	0	0	0	0	0	0	0	0	0	0	0	0	0	0	0	0	0	0	0	0	0	0	0	0	0	0	0	0	0	0	0	0	0	0	0	0	0	0	0	0	0
186af258fa864f91ba4012727ed3e23b	k__Fungi	p__unidentified	c__unidentified	o__unidentified	f__unidentified	g__unidentified	s__unidentified	0	0	0	0	0	0	0	0	0	0	0	0	0	0	0	0	0	0	0	0	0	0	0	0	0	0	0	0	0	0	0	0	0	0	0	0	0	0	0	0	0	0
186cfe1f32b751b9b4846e91eaeb5606	k__Fungi	p__unidentified	c__unidentified	o__unidentified	f__unidentified	g__unidentified	s__unidentified	0	0	0	0	0	0	0	0	0	0	0	0	0	0	0	0	0	0	0	0	0	0	0	0	0	0	0	0	0	0	0	0	0	0	0	0	0	0	0	0	0	0
186d5244186e52d2fc043158b8afc2d5	k__Fungi	p__unidentified	c__unidentified	o__unidentified	f__unidentified	g__unidentified	s__unidentified	0	0	0	0	0	0	0	0	0	0	0	0	0	0	0	0	0	0	0	0	0	0	0	0	0	0	0	0	0	0	0	0	0	0	0	0	0	0	0	0	0	0
186f7e2abe58a590eaf6c8f9d94095dd	k__Fungi	p__unidentified	c__unidentified	o__unidentified	f__unidentified	g__unidentified	s__unidentified	0	0	0	0	0	0	0	0	0	0	0	0	0	0	0	0	0	0	0	0	0	0	0	0	0	0	0	0	0	0	4	0	0	0	0	0	0	0	0	0	0	0
1878cf931aaa5d3ad2e2dd55b7252192	k__Fungi	p__Ascomycota	c__unidentified	o__unidentified	f__unidentified	g__unidentified	s__unidentified	0	0	0	14	0	0	0	0	0	0	0	0	0	0	0	0	0	0	0	0	0	0	0	0	0	0	0	0	0	0	0	0	0	0	0	0	0	0	0	0	0	0
187c064cf0297fe3d2a348de5b1bd70a	k__Fungi	p__Basidiomycota	c__unidentified	o__unidentified	f__unidentified	g__unidentified	s__unidentified	0	0	0	0	0	0	0	0	0	0	0	0	0	0	0	0	0	0	0	0	0	0	0	0	0	0	0	0	0	0	0	0	0	0	0	0	0	0	0	0	0	0
187cfdc5722795bbcdadc870704b9ab3	k__Fungi	p__unidentified	c__unidentified	o__unidentified	f__unidentified	g__unidentified	s__unidentified	0	0	0	0	0	0	0	0	0	0	0	0	0	0	0	0	0	0	0	0	0	0	0	0	0	0	0	0	0	0	0	0	0	0	0	0	0	0	0	0	0	0
187f9662d0cf239f2b33a93948e5386d	k__Fungi	p__Ascomycota	c__Eurotiomycetes	o__unidentified	f__unidentified	g__unidentified	s__unidentified	0	0	0	0	0	0	0	0	0	0	0	0	0	0	0	0	0	0	0	0	0	0	0	0	0	0	0	0	0	0	0	0	0	0	0	0	0	0	0	0	0	0
188396ff05f0b5cf084a55860ad517c4	k__Fungi	p__unidentified	c__unidentified	o__unidentified	f__unidentified	g__unidentified	s__unidentified	0	0	0	0	0	0	0	0	0	0	0	0	0	0	0	0	0	0	0	0	0	0	0	0	0	0	0	0	0	0	0	0	0	0	0	0	0	0	0	0	0	0
188a4855026eb57b181c1c0ebfe89c8f	k__Fungi	p__unidentified	c__unidentified	o__unidentified	f__unidentified	g__unidentified	s__unidentified	0	0	0	0	0	0	0	0	0	0	0	0	0	0	0	0	0	0	0	0	0	0	0	0	0	0	0	0	0	0	0	0	0	0	0	0	0	0	0	0	0	0
18905deda484697da0bae20b18c335ef	k__Fungi	p__unidentified	c__unidentified	o__unidentified	f__unidentified	g__unidentified	s__unidentified	0	0	0	0	0	0	0	0	0	0	0	0	0	0	0	0	0	0	0	0	0	5	0	0	0	0	0	0	0	0	0	0	0	0	0	0	0	0	0	0	0	0
18912004d507f959553591e998b2e4b2	k__Fungi	p__unidentified	c__unidentified	o__unidentified	f__unidentified	g__unidentified	s__unidentified	0	0	0	0	0	0	0	0	8	0	0	0	0	0	0	0	0	0	0	0	0	0	0	0	0	0	0	0	0	0	0	0	0	0	0	0	0	0	0	0	0	0
189488ffa70368ab12705112c9a51283	k__Fungi	p__unidentified	c__unidentified	o__unidentified	f__unidentified	g__unidentified	s__unidentified	0	0	0	0	0	0	0	0	0	0	0	0	0	0	0	0	0	0	0	0	0	0	0	0	0	0	0	0	0	0	0	0	0	0	0	0	0	0	0	0	0	0
18982200db73ab5d8a673833d5a3ac98	k__Fungi	p__unidentified	c__unidentified	o__unidentified	f__unidentified	g__unidentified	s__unidentified	0	0	0	0	0	0	0	0	0	0	0	0	0	0	0	0	0	0	0	0	0	0	0	0	0	0	0	0	0	0	0	0	0	0	0	0	0	0	0	0	0	0
189857af9ebb9ee7cb89bbf7576fa4e8	k__Fungi	p__unidentified	c__unidentified	o__unidentified	f__unidentified	g__unidentified	s__unidentified	0	0	0	0	0	0	0	0	0	0	0	0	0	0	0	0	0	0	0	0	0	0	0	0	0	0	0	0	0	14	0	0	0	0	0	0	0	0	0	0	0	0
189c72d5fae20863a43d90af3c6c5399	k__Fungi	p__Ascomycota	c__Sordariomycetes	o__Hypocreales	f__Nectriaceae	g__Xenoacremonium	s__Xenoacremonium_falcatum	0	0	0	0	0	0	0	0	0	0	0	0	0	0	0	0	0	0	0	0	0	0	0	0	0	0	0	0	0	0	0	0	0	0	0	0	0	0	0	0	0	0
189e3b149d44fa0a9558a1360999d47f	k__Fungi	p__Rozellomycota	c__unidentified	o__unidentified	f__unidentified	g__unidentified	s__unidentified	0	0	0	0	0	0	0	0	0	0	0	0	0	0	0	0	0	0	0	0	0	23	0	0	0	0	0	0	0	0	0	0	0	0	0	0	0	0	0	0	0	0
18a45b9d7144f858683fd844f1787ec2	k__Fungi	p__unidentified	c__unidentified	o__unidentified	f__unidentified	g__unidentified	s__unidentified	0	0	0	0	0	0	0	0	0	0	0	0	0	0	0	0	0	0	0	0	0	0	0	0	0	0	0	0	0	0	0	0	0	0	0	0	0	0	0	0	0	0
18a473b795c4f701d3c519c7a4678a6a	k__Fungi	p__unidentified	c__unidentified	o__unidentified	f__unidentified	g__unidentified	s__unidentified	0	294	112	0	0	16	0	0	0	0	0	0	0	24	0	0	0	0	0	0	0	0	0	0	0	0	0	0	0	0	0	20020	0	0	10265	5447	0	0	7209	2729	0	0
18a5ad648b7d560b654904bb1c350d81	k__Fungi	p__Monoblepharomycota	c__unidentified	o__unidentified	f__unidentified	g__unidentified	s__unidentified	0	0	0	0	0	0	0	0	0	0	0	0	0	0	0	0	0	0	0	0	0	0	0	0	0	0	0	0	0	0	0	0	0	0	0	0	0	0	0	0	0	0
18a5edb7cec9be531db0ca02265e631e	k__Fungi	p__unidentified	c__unidentified	o__unidentified	f__unidentified	g__unidentified	s__unidentified	0	0	0	0	0	0	0	0	0	0	0	0	0	0	0	0	0	0	0	0	0	0	0	0	0	0	0	0	0	0	0	0	0	0	0	0	0	0	0	0	0	0
18a6df57b0fe4cff4abd7b0c97fce689	k__Fungi	p__Ascomycota	c__Sordariomycetes	o__Hypocreales	f__Nectriaceae	g__Fusarium	s__Fusarium_biseptatum	0	0	0	25	0	0	0	0	0	0	0	0	0	0	0	0	0	0	0	0	0	0	0	0	0	0	0	0	0	0	0	0	0	0	0	0	0	0	0	0	0	0
18a8a77890bf88ed133ed549a0c7273e	k__Fungi	p__Rozellomycota	c__unidentified	o__unidentified	f__unidentified	g__unidentified	s__unidentified	0	0	0	0	0	0	0	0	0	0	0	0	0	0	126	0	0	0	0	0	0	0	0	0	0	0	0	0	0	0	0	0	0	0	0	0	0	0	0	0	0	0
18a920c1039a2e8c7bea3e326a9328cb	k__Fungi	p__Ascomycota	c__Leotiomycetes	o__Helotiales	f__Helotiales_fam_Incertae_sedis	g__Volucrispora	s__Volucrispora_graminea	0	0	0	0	0	0	0	0	0	0	0	0	0	0	0	0	0	0	0	0	0	0	0	0	0	0	0	0	0	0	0	0	0	0	0	0	0	0	0	0	0	0
18a9d2854135f59a893f7b739f4695d9	k__Fungi	p__unidentified	c__unidentified	o__unidentified	f__unidentified	g__unidentified	s__unidentified	0	0	0	0	0	0	0	0	0	0	0	0	0	0	0	0	0	0	0	0	0	0	0	0	0	0	0	0	0	0	0	0	0	0	0	0	0	0	0	0	0	0
18afd9e0dcad5561e1ec10532beb1d2c	k__Fungi	p__Ascomycota	c__Leotiomycetes	o__Thelebolales	f__Thelebolaceae	g__unidentified	s__unidentified	0	0	0	0	0	0	11	0	0	0	0	0	0	0	0	0	0	0	0	501	198	0	0	0	0	0	0	0	0	0	0	0	0	0	0	0	0	0	0	0	0	0
18b716504c333abcc10f21013b8ea86d	k__Fungi	p__unidentified	c__unidentified	o__unidentified	f__unidentified	g__unidentified	s__unidentified	0	0	0	0	0	0	0	0	0	0	0	0	0	0	0	0	0	0	0	0	0	0	0	0	0	0	0	0	0	0	0	0	0	0	0	0	0	0	0	0	0	0
18bbad486c4198698d795beda5afa2c5	k__Fungi	p__unidentified	c__unidentified	o__unidentified	f__unidentified	g__unidentified	s__unidentified	0	0	0	0	0	0	0	0	0	0	0	0	0	0	0	0	0	0	0	0	0	0	0	0	0	0	0	0	0	0	0	0	0	0	0	0	0	0	0	0	0	0
18bca6a002073ac9b9bf5705b4fc736e	k__Fungi	p__Rozellomycota	c__unidentified	o__unidentified	f__unidentified	g__unidentified	s__unidentified	0	0	0	0	0	0	0	0	0	0	0	0	0	0	0	0	0	0	0	0	0	0	0	0	0	0	0	0	0	0	0	0	0	0	0	0	0	0	0	0	0	0
18c03880f235eb449888722cf21d237a	k__Fungi	p__Ascomycota	c__Leotiomycetes	o__Helotiales	f__Chaetomellaceae	g__Pilidium	s__unidentified	0	0	0	0	0	0	0	0	0	0	0	0	0	0	0	0	0	0	0	0	0	0	0	0	0	0	0	0	0	0	0	0	0	0	0	0	0	0	0	0	0	0
18c3a9239c328dbda58bd860a94d9da6	k__Fungi	p__Basidiomycota	c__Tremellomycetes	o__Cystofilobasidiales	f__Mrakiaceae	g__Mrakia	s__Mrakia_niccombsii	0	0	0	0	0	0	0	0	0	0	0	0	0	0	0	0	0	0	0	0	0	0	0	0	0	0	0	0	0	0	0	0	0	0	0	0	0	0	0	0	0	0
18ccb39ff311849ea2cfb1fdc9137148	k__Fungi	p__unidentified	c__unidentified	o__unidentified	f__unidentified	g__unidentified	s__unidentified	0	0	0	0	0	0	0	0	0	0	0	0	0	0	0	0	0	0	0	0	0	0	0	0	0	0	0	0	0	0	0	0	0	0	0	0	0	0	0	0	0	0
18d30779a069b9486b0c2e7aa286b800	k__Fungi	p__unidentified	c__unidentified	o__unidentified	f__unidentified	g__unidentified	s__unidentified	0	0	0	0	0	0	0	0	0	0	0	0	0	0	0	0	0	0	0	0	0	0	0	0	0	0	0	0	0	0	0	0	0	0	0	0	0	0	0	0	0	0
18da6b698f2f9668cdee69e8150c0cc6	k__Fungi	p__Chytridiomycota	c__unidentified	o__unidentified	f__unidentified	g__unidentified	s__unidentified	0	0	0	0	0	0	0	0	0	0	0	0	0	0	0	0	0	0	0	0	0	0	0	0	0	0	0	0	0	0	0	0	0	0	0	0	0	0	0	0	0	0
18ddba9294a7511efcfdba14e1887bc5	k__Fungi	p__unidentified	c__unidentified	o__unidentified	f__unidentified	g__unidentified	s__unidentified	0	0	0	0	0	0	0	0	0	0	0	0	0	0	0	0	0	0	0	0	0	0	0	0	0	0	0	0	0	0	0	0	0	0	0	0	0	0	0	0	0	0
18e04cf0294e74ffecb73fa576f62698	k__Fungi	p__Chytridiomycota	c__unidentified	o__unidentified	f__unidentified	g__unidentified	s__unidentified	0	0	0	0	0	0	0	0	0	0	0	0	0	0	0	0	0	0	0	0	0	0	0	0	0	0	0	0	0	0	0	0	0	0	0	0	0	0	0	0	0	0
18e7d705b8ecc59b97a8cad4dd8b2d49	k__Fungi	p__unidentified	c__unidentified	o__unidentified	f__unidentified	g__unidentified	s__unidentified	0	0	0	0	0	0	0	0	0	0	0	99	0	0	0	0	0	0	0	0	0	0	0	0	0	0	0	0	0	0	0	0	0	0	0	0	0	0	0	0	0	0
18ebc0bcec11d65912c449e3fb53b68b	k__Fungi	p__unidentified	c__unidentified	o__unidentified	f__unidentified	g__unidentified	s__unidentified	0	0	0	0	0	0	0	0	0	0	0	0	0	0	0	0	0	0	0	0	0	0	0	0	0	0	0	0	0	0	0	0	0	0	0	0	0	0	0	0	0	0
18edb129a639d4ef4ca5c62fada3393d	k__Fungi	p__Ascomycota	c__Sordariomycetes	o__Hypocreales	f__Nectriaceae	g__Xenoacremonium	s__Xenoacremonium_falcatum	0	0	0	0	0	0	0	0	0	0	0	0	0	0	0	0	0	0	0	0	0	0	0	0	0	0	0	0	0	0	0	0	0	0	0	0	0	0	0	0	0	0
18efaa1ff43db19d50584dd1afc6819c	k__Fungi	p__Monoblepharomycota	c__unidentified	o__unidentified	f__unidentified	g__unidentified	s__unidentified	0	0	0	0	0	0	0	0	0	0	0	0	0	0	0	0	0	0	0	0	0	0	0	0	0	0	0	0	0	0	0	0	0	0	0	0	0	0	0	0	0	0
18f1726aa8d9cc43ae1fe2166743bca7	k__Fungi	p__unidentified	c__unidentified	o__unidentified	f__unidentified	g__unidentified	s__unidentified	0	0	0	0	0	0	0	0	0	0	0	0	0	0	0	0	0	0	0	0	0	0	0	0	0	0	0	0	0	0	0	0	0	0	0	0	0	0	0	0	0	0
18f3c396a5b1392f52be8876bc6afcbf	k__Fungi	p__unidentified	c__unidentified	o__unidentified	f__unidentified	g__unidentified	s__unidentified	0	0	0	0	0	0	0	0	0	0	0	0	0	0	0	0	0	0	0	0	0	0	0	0	6	0	0	0	0	0	0	0	0	0	0	0	0	0	0	0	0	0
18f9a859a6d0dfb8874e0426c76f6c88	k__Fungi	p__unidentified	c__unidentified	o__unidentified	f__unidentified	g__unidentified	s__unidentified	0	0	0	0	0	0	0	0	0	0	0	0	0	0	0	0	0	0	0	0	0	0	0	0	0	0	0	0	0	0	0	0	0	0	0	0	0	0	0	0	0	0
18fa36dbafa665110644468e874470e8	k__Fungi	p__Rozellomycota	c__unidentified	o__unidentified	f__unidentified	g__unidentified	s__unidentified	0	0	0	0	0	0	0	0	0	0	0	0	0	0	0	0	0	0	0	0	0	0	0	0	0	0	0	0	0	0	0	0	0	0	0	0	0	0	0	0	0	0
18ff95f596484e7ded597205d0132b73	k__Fungi	p__unidentified	c__unidentified	o__unidentified	f__unidentified	g__unidentified	s__unidentified	0	0	0	0	0	0	0	0	0	0	0	0	0	0	0	0	0	0	0	0	0	0	0	0	0	0	0	0	0	0	0	0	0	0	0	0	0	0	0	0	0	0
1902d0f6cd8886bc31e49484a71ed834	k__Fungi	p__unidentified	c__unidentified	o__unidentified	f__unidentified	g__unidentified	s__unidentified	0	0	0	0	0	0	0	0	0	0	0	0	0	0	0	0	0	0	0	0	0	0	0	0	0	0	0	0	0	0	0	0	0	0	0	0	0	0	0	0	0	0
1903301938f3a7a2c966725cc5091f9b	k__Fungi	p__unidentified	c__unidentified	o__unidentified	f__unidentified	g__unidentified	s__unidentified	0	0	0	0	0	0	0	0	0	0	0	0	0	0	0	0	0	0	0	0	0	0	0	0	0	0	0	0	0	0	0	0	0	0	0	0	0	0	0	0	0	0
1903d5d2f6f71ef547bc740f444416bb	k__Fungi	p__unidentified	c__unidentified	o__unidentified	f__unidentified	g__unidentified	s__unidentified	0	0	0	0	0	0	0	0	0	0	0	0	0	0	0	0	0	0	0	0	0	0	0	0	0	0	0	0	0	0	0	0	0	0	0	0	0	0	0	0	0	0
190594257a61a538f384011f3717ee1d	k__Fungi	p__unidentified	c__unidentified	o__unidentified	f__unidentified	g__unidentified	s__unidentified	0	0	0	0	0	0	0	0	0	0	0	0	0	0	0	0	0	0	0	0	0	0	0	0	0	0	0	0	0	0	0	0	0	0	0	0	0	0	0	0	0	0
1906489ad5364d9ffe80096b6ffa2067	k__Fungi	p__unidentified	c__unidentified	o__unidentified	f__unidentified	g__unidentified	s__unidentified	0	0	0	0	0	0	0	0	0	0	0	0	0	0	0	0	0	0	0	0	0	0	0	0	0	0	0	0	0	0	0	0	0	0	0	0	0	0	0	0	0	0
1908a11a0a5b8c63502b7024e3eeb2e0	k__Fungi	p__unidentified	c__unidentified	o__unidentified	f__unidentified	g__unidentified	s__unidentified	0	0	0	0	0	0	0	0	0	0	0	0	0	0	0	0	0	0	0	0	0	0	0	0	0	0	0	0	0	0	0	0	0	0	0	0	0	0	0	0	0	0
1909633d4bdc3835d267197a58f4821c	k__Fungi	p__unidentified	c__unidentified	o__unidentified	f__unidentified	g__unidentified	s__unidentified	0	0	0	0	0	0	0	0	0	0	0	0	0	0	0	0	0	0	0	0	0	0	0	0	0	0	0	0	0	0	0	0	0	0	0	0	0	0	0	0	0	0
190aba80b59d5170685f3c23d2dccf0f	k__Fungi	p__unidentified	c__unidentified	o__unidentified	f__unidentified	g__unidentified	s__unidentified	0	0	0	0	0	0	0	0	0	0	0	0	0	0	0	0	0	0	0	0	0	0	0	0	0	0	0	0	0	0	0	0	0	0	0	0	0	0	0	0	0	0
191703fd7d8a61ca6f0cbbcc40734320	k__Fungi	p__Ascomycota	c__Leotiomycetes	o__Helotiales	f__unidentified	g__unidentified	s__unidentified	0	0	0	0	0	0	0	0	0	0	0	0	0	0	0	0	0	0	0	0	0	0	0	0	0	0	0	0	0	0	0	0	0	0	0	0	0	0	0	0	0	0
19185a8c62239d4b58cedf3ba08bd4d9	k__Fungi	p__Basidiomycota	c__Tremellomycetes	o__Cystofilobasidiales	f__Cystofilobasidiaceae	g__Cystofilobasidium	s__Cystofilobasidium_macerans	0	0	0	0	0	0	0	0	0	0	0	0	0	0	0	0	0	0	0	0	0	0	0	0	0	0	0	0	0	0	0	0	0	0	0	0	0	0	0	0	0	0
1919b080a97b6ab2851a007b71bf75c1	k__Fungi	p__unidentified	c__unidentified	o__unidentified	f__unidentified	g__unidentified	s__unidentified	0	0	0	0	0	0	0	0	0	0	0	0	0	0	0	0	0	0	0	0	0	0	0	0	0	0	0	0	0	0	0	0	0	0	0	0	0	0	0	0	0	0
1927089fb5b9a9eea8218ea36fef237e	k__Fungi	p__unidentified	c__unidentified	o__unidentified	f__unidentified	g__unidentified	s__unidentified	0	0	0	0	0	0	0	0	0	0	0	0	0	0	0	0	0	0	0	0	0	0	0	0	0	0	0	0	0	0	0	0	0	0	0	0	0	0	0	0	0	0
19274b4c57a78d110b71e78b07364f8e	k__Fungi	p__Ascomycota	c__Dothideomycetes	o__Capnodiales	f__Cladosporiaceae	g__Cladosporium	s__unidentified	27	0	0	0	0	0	0	0	0	0	0	0	0	0	0	0	0	0	0	0	0	0	0	0	0	0	0	0	0	0	0	0	0	0	0	0	0	0	0	0	0	0
192a0672159fb85f6281fa3f9dfd239b	k__Fungi	p__Rozellomycota	c__unidentified	o__unidentified	f__unidentified	g__unidentified	s__unidentified	0	0	0	0	0	0	0	0	0	0	0	0	0	0	0	0	0	0	0	0	9	0	0	0	0	0	0	0	0	0	0	0	0	0	0	0	0	0	0	0	0	0
192c9e9ce4069335d269018e92c79d31	k__Fungi	p__Ascomycota	c__unidentified	o__unidentified	f__unidentified	g__unidentified	s__unidentified	0	0	0	0	0	0	0	0	0	0	0	0	0	0	0	0	0	0	0	0	0	0	0	0	0	0	0	0	0	0	0	0	0	0	0	0	0	0	0	0	0	0
192f978ce63a4249e92d76e7f0826fa3	k__Fungi	p__unidentified	c__unidentified	o__unidentified	f__unidentified	g__unidentified	s__unidentified	0	0	0	0	0	0	0	0	0	0	0	0	0	0	0	0	0	0	0	0	0	0	0	0	0	0	0	0	0	0	0	0	0	0	0	0	0	0	0	0	0	0
192fd7b43e16566edc458b3d9a011346	k__Fungi	p__unidentified	c__unidentified	o__unidentified	f__unidentified	g__unidentified	s__unidentified	0	0	0	0	0	18	0	0	0	0	0	0	0	0	0	0	0	0	0	0	0	0	0	0	0	0	0	0	0	0	0	0	0	0	0	0	0	0	0	0	0	0
193521d43a685f13ae17cdfc68bdacbd	k__Fungi	p__unidentified	c__unidentified	o__unidentified	f__unidentified	g__unidentified	s__unidentified	0	0	0	0	0	0	0	0	0	0	0	0	0	0	0	0	0	0	0	0	0	0	0	0	0	0	0	0	0	0	0	0	0	0	0	0	0	0	0	0	0	0
1939aa9681e33f6ebd114e1a6272bc13	k__Fungi	p__unidentified	c__unidentified	o__unidentified	f__unidentified	g__unidentified	s__unidentified	0	0	0	0	0	0	0	0	0	0	0	0	0	0	11	0	0	0	0	0	0	0	0	0	0	0	0	0	0	0	0	0	0	0	0	0	0	0	0	0	0	0
193ff4b4036c9b40297503b0fd8711ca	k__Fungi	p__unidentified	c__unidentified	o__unidentified	f__unidentified	g__unidentified	s__unidentified	0	0	0	0	0	0	0	0	0	0	0	0	0	0	0	0	0	0	0	0	0	0	0	0	0	0	0	0	0	0	0	0	0	0	0	0	0	0	0	0	0	0
194b0fa97ca002e9afa7b37efb3e9588	k__Fungi	p__unidentified	c__unidentified	o__unidentified	f__unidentified	g__unidentified	s__unidentified	0	0	0	0	0	0	2	0	0	0	0	0	0	0	0	0	0	0	0	0	0	0	0	0	0	0	0	0	0	0	0	0	0	0	0	0	0	0	0	0	0	0
1957f9ff32f2acd28fa3a4eda0c3fd89	k__Fungi	p__Ascomycota	c__Leotiomycetes	o__Helotiales	f__unidentified	g__unidentified	s__unidentified	0	0	0	0	0	0	0	0	0	0	0	0	0	0	0	0	0	0	0	0	0	0	0	0	0	0	0	0	0	0	0	0	0	0	0	0	0	0	0	0	0	0
1960a0bbe5b919995035b02d0b64ab05	k__Fungi	p__Basidiomycota	c__unidentified	o__unidentified	f__unidentified	g__unidentified	s__unidentified	0	0	0	0	0	0	0	0	0	0	0	0	0	0	0	0	0	0	0	0	0	0	0	0	0	0	0	0	0	0	0	0	0	0	0	0	0	0	0	0	0	0
1961da850df6e7092e62cb059df158ec	k__Fungi	p__unidentified	c__unidentified	o__unidentified	f__unidentified	g__unidentified	s__unidentified	0	0	0	0	0	0	0	0	0	0	0	0	0	0	0	0	0	0	0	0	0	0	0	0	0	0	0	0	0	0	0	0	0	0	0	0	0	0	0	0	0	0
19632ea613ff56bf86fd45325abfb95d	k__Fungi	p__Ascomycota	c__Leotiomycetes	o__Helotiales	f__unidentified	g__unidentified	s__unidentified	0	0	0	0	0	0	0	0	0	0	0	0	0	0	0	0	0	0	0	0	0	0	0	0	0	0	0	0	0	0	0	0	0	0	0	0	0	0	0	0	0	0
19636fbbbe4dbf42d0ee575a645a06d8	k__Fungi	p__Basidiomycota	c__Tremellomycetes	o__Filobasidiales	f__Piskurozymaceae	g__Piskurozyma	s__unidentified	0	0	0	0	0	0	0	0	0	0	0	0	0	0	0	0	0	0	0	0	0	0	0	0	0	0	0	0	0	0	0	0	0	0	0	0	0	0	0	0	0	0
19641d149e26cba0632f0594c1782a2d	k__Fungi	p__Chytridiomycota	c__Lobulomycetes	o__unidentified	f__unidentified	g__unidentified	s__unidentified	0	0	0	0	0	0	0	0	0	0	0	0	0	0	0	0	0	0	0	0	0	0	0	0	0	0	0	0	0	0	0	0	0	0	0	0	0	0	0	0	0	0
1965057c3f02f1be7bd789589d57e5ae	k__Fungi	p__Chytridiomycota	c__unidentified	o__unidentified	f__unidentified	g__unidentified	s__unidentified	0	0	0	0	0	0	0	0	0	0	0	0	0	0	0	0	0	0	0	0	0	0	0	0	0	0	0	0	0	0	0	0	0	0	0	0	0	0	0	0	0	0
196f82af0a3f3fc91aa0d6c0f49d53ad	k__Fungi	p__unidentified	c__unidentified	o__unidentified	f__unidentified	g__unidentified	s__unidentified	0	0	0	0	0	0	0	0	0	0	0	0	0	0	0	0	0	0	0	0	0	0	0	0	0	0	0	0	0	0	0	0	0	0	0	0	0	0	0	0	0	0
19716b9284c4548ad3d24f8187b4b333	k__Fungi	p__unidentified	c__unidentified	o__unidentified	f__unidentified	g__unidentified	s__unidentified	0	0	0	0	0	0	0	0	0	0	0	0	0	0	0	0	0	0	0	0	0	0	0	0	0	0	0	0	0	0	0	0	0	0	0	0	0	0	0	0	0	0
1972e104c6b012e5811d4447b8f7c227	k__Fungi	p__Ascomycota	c__Leotiomycetes	o__Helotiales	f__Hyaloscyphaceae	g__Hyphodiscus	s__unidentified	0	0	0	0	0	0	0	0	0	0	0	0	0	0	0	0	0	0	0	0	0	11	0	0	0	0	0	0	0	0	0	0	0	0	0	0	0	0	0	0	0	0
197859176dee3449c71c89e06ade43ac	k__Fungi	p__Ascomycota	c__Lecanoromycetes	o__Lecanorales	f__Ramalinaceae	g__unidentified	s__unidentified	0	0	0	0	0	0	0	0	0	0	0	0	0	0	0	0	0	0	0	0	0	0	0	0	0	0	0	0	0	0	0	0	0	0	0	0	0	0	0	0	0	0
197fc1e12b706f00476881238bbb06e2	k__Fungi	p__Ascomycota	c__Dothideomycetes	o__Capnodiales	f__Cladosporiaceae	g__Cladosporium	s__Cladosporium_cladosporioides	0	0	0	0	0	0	923	12	0	17	0	0	178	0	0	0	0	0	0	0	0	0	0	0	0	0	0	0	0	0	2250	0	0	0	0	0	0	17	0	0	0	0
197ffb74716243b9e3a8ba2203f8a9ce	k__Fungi	p__unidentified	c__unidentified	o__unidentified	f__unidentified	g__unidentified	s__unidentified	0	0	20	0	0	0	0	0	0	0	0	0	0	0	0	0	0	0	0	0	0	0	0	0	0	0	0	0	0	0	0	0	0	0	0	0	0	0	0	0	0	0
1980e61015759194ee7823a828294650	k__Fungi	p__Ascomycota	c__Lecanoromycetes	o__unidentified	f__unidentified	g__unidentified	s__unidentified	0	0	0	0	0	0	0	0	0	0	0	0	0	0	0	0	0	0	0	0	0	0	0	0	0	0	0	0	0	0	0	0	0	0	0	0	0	0	0	0	0	0
19845528e627faaad1b38e29667e73e4	k__Fungi	p__unidentified	c__unidentified	o__unidentified	f__unidentified	g__unidentified	s__unidentified	0	0	0	0	0	0	0	0	0	0	0	0	0	0	0	0	0	0	0	0	0	0	0	0	0	0	0	0	0	0	0	0	0	0	0	0	0	0	0	0	0	0
19849148d4f559f29c9c32f4535aa2fa	k__Fungi	p__unidentified	c__unidentified	o__unidentified	f__unidentified	g__unidentified	s__unidentified	0	0	0	0	0	0	0	6	0	0	0	0	89	0	0	0	0	0	0	0	0	0	0	0	0	0	0	0	0	0	50	0	0	0	0	0	0	0	0	0	0	0
19852e7b1b17649f1ae2737e89284fff	k__Fungi	p__unidentified	c__unidentified	o__unidentified	f__unidentified	g__unidentified	s__unidentified	0	0	0	0	0	0	0	0	0	0	0	0	0	0	0	0	0	0	0	0	0	0	0	0	0	0	0	0	0	0	0	0	0	0	0	0	0	0	0	0	0	0
19857c1de1d3a7b1109ac9670eddddef	k__Fungi	p__Ascomycota	c__Leotiomycetes	o__Helotiales	f__unidentified	g__unidentified	s__unidentified	0	0	0	0	0	0	0	0	0	0	0	0	0	0	0	0	0	0	0	0	0	0	0	0	0	0	0	0	0	0	0	0	0	0	0	0	0	0	0	0	0	0
19877fad47dc2b0189ccdbbed0da9af2	k__Fungi	p__unidentified	c__unidentified	o__unidentified	f__unidentified	g__unidentified	s__unidentified	0	0	0	0	0	0	0	0	0	0	0	0	0	0	0	0	0	0	0	0	0	0	0	0	0	0	0	0	0	0	0	0	0	0	0	0	0	0	0	0	0	0
1988bbb3cca4de19b55b936b4cf0928a	k__Fungi	p__Ascomycota	c__Dothideomycetes	o__Pleosporales	f__Melanommataceae	g__Alpinaria	s__Alpinaria_rhododendri	0	0	0	0	0	0	0	0	0	0	0	0	0	0	0	0	0	0	0	0	0	0	0	0	0	0	0	0	0	0	0	0	0	0	0	0	0	0	0	0	0	0
198a9e6bd314e0c082d8f3b7e7b01261	k__Fungi	p__unidentified	c__unidentified	o__unidentified	f__unidentified	g__unidentified	s__unidentified	0	0	0	0	0	0	0	0	0	0	0	0	0	0	0	0	0	0	0	0	0	0	0	0	0	0	0	0	0	0	0	0	0	0	0	0	0	0	0	0	0	0
199a90e45c86d33b66c4d29a0e57d7ed	k__Fungi	p__Chytridiomycota	c__unidentified	o__unidentified	f__unidentified	g__unidentified	s__unidentified	0	0	0	0	0	0	0	0	0	0	0	0	0	0	0	0	0	0	0	0	0	0	0	0	0	0	0	0	0	0	0	0	0	0	0	0	0	0	0	0	0	0
199cbeb71e8b1008f801a4615c7dfc98	k__Fungi	p__Chytridiomycota	c__unidentified	o__unidentified	f__unidentified	g__unidentified	s__unidentified	0	0	0	0	0	0	0	0	0	0	0	0	0	0	0	0	0	0	0	0	0	0	0	0	0	0	0	0	0	0	0	0	0	0	0	0	0	0	0	0	0	0
19a163a9ca8bb8f5f740e389d2449da8	k__Fungi	p__Chytridiomycota	c__unidentified	o__unidentified	f__unidentified	g__unidentified	s__unidentified	0	0	0	0	0	0	0	0	0	0	0	0	0	0	0	0	0	0	0	0	0	0	0	0	0	0	0	0	0	0	0	0	0	0	0	0	0	0	0	0	0	0
19a321676cf57a0c2febcb4328d5a3cf	k__Fungi	p__Chytridiomycota	c__unidentified	o__unidentified	f__unidentified	g__unidentified	s__unidentified	0	0	0	0	0	0	0	0	0	0	0	0	0	0	0	0	0	0	0	0	0	0	0	0	0	0	0	0	0	0	0	0	0	0	0	0	0	0	0	0	0	0
19a756a65d10ea8ac33439dd0c2e9f1c	k__Fungi	p__Basidiomycota	c__Microbotryomycetes	o__Kriegeriales	f__Kriegeriaceae	g__Phenoliferia	s__Phenoliferia_psychrophila	0	0	0	0	0	0	0	0	0	0	0	0	0	0	0	0	0	0	0	0	0	0	0	0	0	0	0	0	0	0	0	0	0	0	0	0	0	0	0	0	0	0
19aae36b911593dc39107fb2790677ac	k__Fungi	p__Ascomycota	c__Lecanoromycetes	o__Trapeliales	f__Trapeliaceae	g__Placopsis	s__Placopsis_contortuplicata	0	6	0	0	0	0	0	0	0	0	0	0	0	0	0	0	0	0	0	0	0	0	0	0	0	0	0	0	0	0	0	0	0	0	0	0	0	0	0	0	0	0
19ae2c160b7186f66aacd49f2d118e36	k__Fungi	p__unidentified	c__unidentified	o__unidentified	f__unidentified	g__unidentified	s__unidentified	0	0	0	0	0	0	0	0	0	0	0	0	0	0	0	0	0	0	0	0	0	0	0	0	0	0	0	0	0	0	0	0	0	0	0	0	0	0	0	0	0	0
19b0fe1ec60f6e979283766592414241	k__Fungi	p__Chytridiomycota	c__unidentified	o__unidentified	f__unidentified	g__unidentified	s__unidentified	0	0	0	0	0	0	0	0	0	0	0	0	0	0	0	0	0	0	0	0	0	0	0	0	0	0	0	0	0	0	0	0	0	0	0	0	0	0	0	0	0	0
19b91f4c5b273c7a90a58cb15f684dca	k__Fungi	p__unidentified	c__unidentified	o__unidentified	f__unidentified	g__unidentified	s__unidentified	0	0	0	0	0	0	0	0	0	0	0	0	0	0	0	0	0	0	0	0	0	0	0	0	0	0	0	0	0	0	0	0	0	0	0	0	0	0	0	0	0	0
19bb7a9c73bb8b68ae20cd0ce9ce7068	k__Fungi	p__Chytridiomycota	c__unidentified	o__unidentified	f__unidentified	g__unidentified	s__unidentified	0	0	0	0	0	0	0	0	0	0	0	0	0	0	0	0	0	0	0	0	0	0	0	0	0	0	0	0	0	0	0	0	0	0	0	0	0	0	0	0	0	0
19bcf9ef258475a57b5b0a880ea47f37	k__Fungi	p__unidentified	c__unidentified	o__unidentified	f__unidentified	g__unidentified	s__unidentified	0	0	0	0	0	0	0	0	0	0	0	0	0	0	0	0	0	0	0	0	0	0	0	0	0	0	0	0	0	0	0	0	0	0	0	0	0	0	0	0	0	0
19bf4b0c8f39e06caf724e9b9f4f4bfc	k__Fungi	p__Chytridiomycota	c__unidentified	o__unidentified	f__unidentified	g__unidentified	s__unidentified	0	0	0	0	0	0	0	0	0	0	0	0	0	0	0	0	0	0	0	0	0	0	0	0	0	0	0	0	0	0	0	0	0	0	0	0	0	0	0	0	0	0
19c4d39bd61827f490b8dc85cb5eb8ea	k__Fungi	p__unidentified	c__unidentified	o__unidentified	f__unidentified	g__unidentified	s__unidentified	0	3	0	0	0	0	0	0	0	0	0	0	0	0	0	0	0	0	0	0	0	0	0	0	0	0	0	0	0	0	0	0	0	0	0	0	0	0	0	0	0	0
19c56731cd3d4635e2ac72a95886d4a9	k__Fungi	p__unidentified	c__unidentified	o__unidentified	f__unidentified	g__unidentified	s__unidentified	0	0	0	0	0	0	0	0	0	0	0	0	0	0	0	0	0	0	0	0	0	0	0	0	0	0	0	0	0	0	0	0	0	0	0	0	0	0	0	0	0	0
19cdce35d9e96ccf09484954bd2a6d39	k__Fungi	p__unidentified	c__unidentified	o__unidentified	f__unidentified	g__unidentified	s__unidentified	0	0	0	0	0	0	0	0	0	0	0	0	0	0	0	0	0	0	0	0	0	0	0	0	0	0	0	0	0	0	0	0	0	0	0	0	0	0	0	0	0	0
19d2901a9d3b8c4b5ef522757ba2414c	k__Fungi	p__unidentified	c__unidentified	o__unidentified	f__unidentified	g__unidentified	s__unidentified	0	0	22	0	0	0	0	0	0	0	0	0	0	0	0	0	0	0	0	0	0	0	0	0	0	0	0	0	0	0	0	0	0	0	0	0	0	0	0	0	0	0
19d2efc727b812e22be0726397d155e2	k__Fungi	p__unidentified	c__unidentified	o__unidentified	f__unidentified	g__unidentified	s__unidentified	0	0	0	0	0	0	0	0	0	0	0	0	0	0	0	0	0	0	0	0	0	0	0	0	0	0	0	0	0	0	0	0	0	0	0	0	0	0	0	0	0	0
19d7381b8a38ec205eac8a82b0ac05de	k__Fungi	p__unidentified	c__unidentified	o__unidentified	f__unidentified	g__unidentified	s__unidentified	0	0	0	0	0	0	0	0	0	0	0	0	0	0	0	0	0	0	0	0	0	0	0	0	0	0	0	0	0	0	0	0	0	0	0	0	0	0	0	0	0	0
19d91d013f1a0d1be2e231b580f4ac6a	k__Fungi	p__unidentified	c__unidentified	o__unidentified	f__unidentified	g__unidentified	s__unidentified	0	0	0	0	0	0	0	0	0	0	0	0	0	0	0	0	0	0	0	0	0	0	0	0	0	0	0	0	0	0	0	0	0	0	0	0	0	0	0	0	0	0
[truncated: 15,473 more rows]
[truncated: 171 more columns]
